# Supplementary material
Source: HighWire-hosted journal article supplement (doi:10.1101/rna.057208.116)
Supplement: Supplemental_Tables_S1-S4.xlsx [file Supplemental_Tables_S1-S4.xlsx]

## Sheet: FPKM_heatmap
Supplemental Table S1: FPKMs of differentially expressed mRNAs
		L2	L312	PhaxSh/Sh	SmnX7/D	Ars2C/E	Ore-R	P1-2
1	CG13958,sick,snRNA:U2:38ABb	11.9415	7.92003	42.7418	11.908	14.3995	3.86398	5.4338
2	CG11300	2289.81	2812.75	752.851	1088.83	1068.59	1889.54	1366.02
3	Obp56a	2000.68	677.297	655.779	115.74	587.005	329.699	256.294
4	Cys	1055	1038.64	480.14	240.288	404.217	606.393	414.645
5	CG14300	908.06	2358.37	291.417	881.36	640.436	1828.91	4194.52
6	CG3264	567.714	166.395	3.47795	33.3685	38.745	23.4597	427.693
7	Ucrh	562.566	631.315	285.527	207.625	658.104	754.303	295.295
8	Peritrophin-15b,lectin-29Ca	525.096	1132.72	214.496	480.605	853.636	1194.94	2965.06
9	CG12057	403.154	124.785	43.3146	95.1936	174.265	1190.04	1794.71
10	CG13560	402.994	1836	539.199	698.238	16.4597	1106.45	807.303
11	CG13049	387.311	372.346	2150.92	35.4105	858.439	2.57527	0.319035
12	TwdlBeta	200.963	186.185	609.877	15.9546	420.059	10.4861	4.80755
13	GstD4,GstD5,GstD6,GstD7	196.259	158.96	1588.31	373.26	732.895	301.827	19.7424
14	CG14147	193.211	197.712	669.749	20.0278	488.277	1.06036	0.165898
15	Obp99a	191.572	377.381	54.8102	26.7741	133.429	428.974	300.542
16	CG7548	186.612	108.539	500.027	32.2295	287.309	0.927331	0.114065
17	CG10621	150.658	296.394	73.1794	91.2029	54.4717	232.043	213.785
18	Oat	142.223	143.701	22.9171	14.3024	28.7829	242.648	108.263
19	CG10911	131.36	205.445	829.848	1040.71	502.348	212.229	57.5668
20	GstE9	125.428	143.706	450.333	298.323	236.879	146.527	67.7118
21	GstS1	115.621	141.518	472.161	177.434	263.325	159.311	158.445
22	deltaTry	111.77	152.019	30.1539	36.1734	99.1235	111.591	961.738
23	vanin-like	110.222	49.7055	150.559	202.732	295.488	85.2423	66.7055
24	CG33281	98.3882	141.349	30.4975	44.5829	45.6636	79.0226	57.6359
25	CG12171	98.214	135.357	915.868	322.948	220.808	137.417	73.4667
26	CG15212	95.0378	291.684	1119.51	93.9272	382.94	12.9288	35.292
27	CG2076	92.7825	114.73	401.467	170.366	168.707	104.948	101.567
28	CG16790,CG9396	89.9779	164.889	31.0765	99.3545	56.6227	102.464	41.7436
29	CG2150	85.0857	61.8686	254.7	15.5596	149.511	0.265041	0.294692
30	CG1969	81.6647	152.621	52.1311	32.2161	67.5426	70.3707	104.711
31	CG14095	78.931	189.337	628.869	53.5999	344.887	1.5358	1.68488
32	CG18522	78.5822	85.5907	861.771	216.186	227.751	56.0139	36.8118
33	CG7252	76.9171	78.0135	24.9244	81.2811	56.6861	76.885	126.406
34	Aph-4	75.0229	97.7924	25.4089	81.7011	77.3791	63.5913	19.9489
35	mRpS5	72.6301	74.5899	292.77	226.896	148.731	110.662	31.5296
36	CG33267,CG7394	71.1616	69.5993	473.741	362.119	129.424	54.5862	35.2201
37	CG3292	70.9554	42.332	0.274588	0.402166	0.458477	83.6852	432.777
38	Cpr65Ec	68.7244	124.883	365.142	40.7341	205.795	1.50063	2.71157
39	CG10073	68.0695	330.695	2.80943	115.3	21.0177	123.539	73.8414
40	ImpE2	66.5226	17.9075	133.281	1.4308	80.8484	8.51256	25.9027
41	CG12734,CG32284,CG42494	65.9127	127.458	63.9285	582.74	392.464	118.033	213.657
42	CG14205	65.4056	25.169	11.2023	46.2326	217.356	28.3845	51.2312
43	CG15250,CG15251	64.4698	107.841	333.371	24.5028	251.537	3.3783	2.90482
44	Tsf1	61.206	174.949	23.668	130.037	82.3596	208.852	351.578
45	CG18431,CG4844	60.6166	38.3193	26.8985	9.81723	19.6119	77.9842	131.89
46	GstD2	56.0722	142.781	761.093	264.223	458.333	240.852	14.7502
47	CG11425	53.4058	99.2722	8.57112	26.4152	13.63	33.944	8.6412
48	CG12164	51.1939	64.3701	193.718	17.1326	81.2177	0.554509	0.718242
49	GstE8	51.0716	38.0405	233.418	90.4177	82.9029	76.6407	31.7496
50	Cyp6a2	49.1382	30.6949	102.773	14.2692	334.836	25.2411	11.2521
51	CG15369	48.1924	137.601	263.102	3.75949	201.95	801.631	973.545
52	Cyp6a8	46.6399	97.4966	50.8345	14.1415	104.991	254.02	36.1803
53	CG30413	45.5522	23.9363	119.529	34.876	66.5734	15.497	2.19306
54	GalNAc-T1	45.1205	39.5722	22.6517	12.801	22.6379	28.2866	34.1336
55	CG31288	44.814	47.5832	425.206	157.138	112.371	52.0183	12.9033
56	v	43.8299	56.8599	12.5458	17.5132	40.5465	28.9604	19.4831
57	CG10638	42.6082	60.2745	363.317	252.067	75.6316	62.7819	47.925
58	TwdlE	41.9806	24.2794	106.39	7.93676	62.703	2.91368	2.982
59	Cirl	37.2973	27.3869	9.18404	7.76977	12.4554	19.7972	39.2741
60	Cht4	36.7995	63.4148	13.3657	75.4438	57.7067	31.5797	6.17969
61	CG15818	34.8169	30.2849	203.031	51.9791	27.7192	49.3772	66.9295
62	sgl	33.6205	23.9051	90.7554	85.8284	48.7482	30.5011	16.112
63	rtet	30.9123	20.1601	15.4317	2.96631	16.1309	15.7532	21.3831
64	MRP	30.6305	35.5164	101.112	70.9028	136.891	25.473	15.5759
65	CG40160	30.2365	49.2302	29.2735	37.5624	6.82875	40.3876	48.4079
66	CG14120	30.0804	12.9907	54.684	97.6318	69.6726	36.733	79.7676
67	Cyp4ad1	30.0024	24.0114	8.73947	12.7448	18.0166	30.2402	70.0206
68	CG12490,CG30265,CG9825	28.5267	13.6748	3.58507	21.6958	49.0229	38.4886	46.8774
69	Cyp28d2	28.5028	18.1253	1.16858	93.7635	93.2155	10.9174	4.31297
70	CG2064	27.7264	41.0838	288.989	273.832	98.4693	96.1826	49.4937
71	eIF4E-3	26.8884	30.9157	1.34295	14.3158	1.8199	40.849	48.2765
72	CG1208,glob3	25.914	18.4208	32.805	49.2039	5.12323	50.1933	11.2389
73	CG14291	22.1961	17.79	8.36619	5.42309	13.2074	14.1923	27.0456
74	CG5550	20.2619	35.915	154.468	219.171	436.158	40.2282	17.3034
75	Pk61C	19.8343	17.8073	98.0341	22.3229	76.5334	15.4014	17.5207
76	CG7720	19.4729	12.277	71.0602	62.5215	28.0367	19.7969	22.5002
77	Cyp12c1	19.1841	28.4959	164.21	56.1845	113.886	7.74965	19.8793
78	CG40263	17.4485	21.5392	20.6828	30.7968	3.34778	39.4524	17.5382
79	GstD3	17.4322	24.6049	678.272	114.054	185.626	62.3654	20.8795
80	Cyp309a1,Cyp309a2	17.0373	28.392	319.66	135.349	117.545	113.713	20.7101
81	Cyp6a17	16.2388	29.0621	20.3368	31.2647	3.27805	34.9733	45.1
82	CG17082	16.1335	16.7706	22.0642	29.8744	75.1565	35.1214	18.4746
83	CG15784	15.1508	32.9676	1300.96	611.931	2815.58	168.725	61.2931
84	GstD8	14.8912	9.6786	12.4571	65.6941	63.3117	8.82376	1.55398
85	CG6996	14.7702	10.9366	67.9157	15.2497	84.6577	38.8603	57.4503
86	CG4860	14.4181	24.3121	7.35132	1.57678	12.457	16.8948	12.844
87	PPP4R2r	14.3147	14.314	13.7483	10.9488	4.67654	23.9843	23.9345
88	CG31793	13.6435	16.7649	45.3386	47.4076	7.51953	5.56439	6.58596
89	CG17374	13.5946	4.97359	3.17889	1.26844	9.78799	9.01849	15.3625
90	Cyp6a23	13.2245	23.1393	23.9445	161.177	173.22	61.5056	24.7127
91	CG18417	13.0298	15.6064	2.44122	0.47982	3.61005	13.5683	84.551
92	beta4GalNAcTB	12.856	16.1347	49.4035	22.486	28.7979	19.1402	18.2684
93	Arc1,CG10102	12.6328	65.885	3606.55	3270.54	816.891	593.255	78.6169
94	NAAT1	12.5848	11.4655	7.4705	36.6272	11.8045	11.7134	27.317
95	CG4607	12.2238	13.2258	37.9958	16.1873	14.248	7.98544	15.5661
96	CG16820	11.8637	16.9625	44.9712	8.92209	30.9014	13.5596	4.7386
97	CG15255	11.0242	21.6287	178.496	97.6664	50.4829	83.776	29.2124
98	IM3	10.7196	99.5882	7.08339	641.162	177.567	25.0709	126.326
99	CG12769	10.5738	7.07694	15.3318	0.90118	30.8483	0.104967	0.135964
100	CG14961	10.475	26.5796	72.7558	1.21176	28.5096	1.04145	0.566447
101	IM4	10.3375	25.5688	9.21824	154.615	53.0283	16.0566	50.724
102	CG12766	10.1642	10.1008	161.204	101.662	32.8762	4.652	1.03708
103	CG42807	10.158	158.095	290.438	1036.46	142.838	227.771	123.158
104	CG5830	9.79852	11.7673	18.2151	22.811	32.9455	16.2875	11.1537
105	CG31224	8.6173	9.0761	8.39391	6.88998	24.8737	4.64216	8.25594
106	Mocs1	8.15865	12.084	66.3412	36.6495	26.5773	6.40311	6.13725
107	CG4465	8.11314	17.0823	5.62933	8.09855	0.969116	6.55692	11.7128
108	IM1	7.85886	48.7892	10.5741	159.055	181.176	36.4074	37.723
109	CG34394	7.51383	8.05357	17.4683	19.7012	21.3629	9.24907	5.51385
110	CG17560	7.21642	14.0616	0.40221	3.64646	2.81156	2.48386	2.50445
111	CG10562	6.86779	7.11149	13.9205	23.823	10.2609	3.94406	3.55523
112	Socs36E	6.83928	7.63828	8.45377	20.7011	26.9495	7.12257	5.86171
113	CG2543	6.64833	8.16637	12.811	11.11	22.4742	7.39163	4.10954
114	CG32195,CG7341	6.55471	11.9059	36.3799	15.847	17.5613	11.6529	4.75211
115	CG34043	6.46753	13.8131	23.1206	44.045	15.8641	10.3841	5.24302
116	CG14567	6.43331	5.55449	13.6028	27.1842	25.1453	1.94037	1.44446
117	CG13675	6.21866	6.74802	23.9106	3.11036	18.8228	0.10137	1.32036
118	ASPP,CG15661	6.18471	4.96128	152.47	30.1274	32.5826	7.85515	4.53646
119	CG31633	6.0522	7.02342	27.5086	17.6622	9.9571	11.6188	6.28816
120	CG8665	6.03247	48.6281	0.791015	12.7279	0.527099	26.239	181.956
121	CG14907	5.98301	7.38189	65.7098	29.6576	40.7142	10.8166	6.60705
122	CG30151	5.88158	10.1511	18.4429	33.972	26.9087	13.1015	8.1022
123	Poxm	5.48593	7.83209	9.83655	14.1042	53.9253	15.973	86.5375
124	CG9426	5.34356	6.83758	5.57082	7.41549	25.4033	5.44472	8.43467
125	CG9928	5.33041	56.2047	256.967	164.815	28.1303	9.15529	47.0029
126	CG4835	5.28041	4.64816	15.6438	44.7737	9.92192	18.0495	9.29211
127	v(2)k05816	5.2695	9.55315	5.15991	3.04981	35.9189	1.77928	5.63602
128	Bace	5.17134	12.0979	162.022	477.506	224.875	29.3384	57.894
129	CG14606	5.14145	9.45932	8.47244	10.7184	27.6787	7.60029	7.30847
130	lcs	4.56995	7.12094	60.1422	81.252	20.0162	5.86627	14.1252
131	Edg91	4.56125	85.9251	57.3148	237.78	299.442	18.4295	19.6762
132	CG9505	4.54077	7.25228	16.3358	19.9409	6.24305	4.58189	8.52631
133	CycE	4.36276	3.97297	2.91324	2.71743	13.3745	4.71351	3.95638
134	CG34401	4.33465	4.84005	20.5987	2.5083	3.084	2.11584	4.23154
135	CG3857	4.26911	6.66336	5.03942	6.64346	32.265	3.04246	8.63995
136	CG31436	3.91514	4.46974	5.02068	18.5287	11.5665	7.81558	6.36899
137	CG18437	3.85941	1.53353	0.677397	0.670703	13.1221	0.300092	0.675687
138	CG3397	3.76681	14.7336	427.354	4.94549	11.6206	85.3937	112.074
139	CG13239	3.51329	25.0462	79.214	6.38271	37.361	0.849899	0.419849
140	CG13028	3.44402	7.07537	26.7059	9.92739	25.6185	2.37681	2.53605
141	CG42369	3.44377	31.6765	104.677	35.9325	12.4917	8.91224	13.9511
142	CG17352	3.41929	3.86511	2.45144	1.39802	14.658	0.967977	1.62264
143	CG8620	3.24691	4.60688	173.712	76.7094	14.8274	4.80149	4.60058
144	Obp18a	3.236	2.71937	19.2233	3.06601	3.25198	1.60856	1.73417
145	FucTC	3.23105	3.18702	45.4977	21.3994	19.9582	16.5627	1.93462
146	CG5953	2.85467	4.60666	6.65651	11.6238	14.1902	4.95752	2.7007
147	CG2065	2.85364	4.14563	29.3901	23.4866	10.5968	6.96847	3.53508
148	d	2.78157	3.38662	1.52879	0.626518	1.79349	4.84824	8.84116
149	CG15394	2.66585	1.41006	6.40539	24.6342	15.1616	2.82499	1.55597
150	CG12224	2.60069	4.30376	87.8526	21.9816	9.43207	7.37566	5.23377
151	ds	2.44116	2.09746	0.711469	0.396898	1.07977	1.85057	3.75619
152	Su(z)2	2.34507	1.98326	2.00171	1.94284	10.6844	1.10926	1.38189
153	Ugt86Dc	2.20642	0.927663	3.35668	2.01685	19.8159	0.148878	0.0617369
154	CG18661,Try29F	2.06911	6.71623	3.5396	31.3948	3.87677	6.87043	5.20935
155	alphagamma-element:CR32865	1.95537	2.10266	12.4711	61.3945	132.423	37.6818	1.26874
156	Obp46a	1.83547	1.23036	0.266478	0	0.477475	0.644346	0.809897
157	Dro	1.82696	34.158	41.4925	256.128	96.7476	74.1511	121.288
158	phr	1.56808	1.95927	18.1382	1.82531	14.2064	7.29478	3.91449
159	CG14219	1.56723	4.53702	3.61315	9.91918	140.031	3.1643	1.18207
160	CG18278	1.10747	2.26688	0.761176	0.653387	0	0.882145	2.13187
161	sv	1.06686	0.472678	8.66803	4.44428	0.603292	0.283928	0.497991
162	CG8539	1.04625	1.5978	11.4669	1.77638	8.76027	2.87731	3.39763
163	CG4949	1.01029	1.32625	22.8218	2.79374	7.49984	3.9262	1.8107
164	CG4017	0.855889	0.955233	9.72722	1.01132	10.133	0.148812	0.0792738
165	CG17999	0.813404	0.619499	1.60486	22.5248	3.5423	0.50199	4.03843
166	Cpr49Ae	0.772235	12.0995	34.3452	24.5855	12.7546	1.39334	2.66054
167	CG30080,CG42662	0.740226	8.62182	4.97133	34.2454	14.2395	7.32039	16.7551
168	Ugt86Di	0.61865	0.488691	11.4041	6.45637	2.24191	1.36754	3.75149
169	AttA	0.600592	18.2474	9.25698	125.94	98.6777	27.9671	54.3909
170	CG6639	0.549425	11.707	5.2297	238.273	19.6552	32.8353	84.8694
171	CG11878	0.509005	1.43503	16.4265	5.12795	6.19988	2.8891	2.60646
172	CG33225	0.47844	12.8501	2.20701	26.1852	64.4829	25.9906	75.1053
173	ppk6	0.462508	0.741154	2.03536	31.351	2.2449	0.481565	0.908663
174	Btd	0.34612	0.368112	0.18638	0.196552	0.260664	0.891908	1.47107
175	Cyp6d2	0.316968	2.05711	92.7492	54.9218	3.59314	20.9113	15.9159
176	CG9447	0.305525	0.802981	0.185363	0.36485	5.41376	0.879965	0.607881
177	w	0.161843	0.685434	0.610169	2.68579	0.887656	1.50024	0.624104
178	TepI	0.0959811	0.937367	0.336764	27.8398	2.58885	8.29235	8.00709
179	dro6	0	0	0.537708	0.0917839	0	0	0
180	CG42791	0	0	0	0.837112	0.186909	0	0
181	CG5302	0	0	0	0.522389	0	0	0.372433
182	TotZ	0	0	0.0508757	11.089	0.634763	0	0.055281
183	Acp29AB	0	0	0	0	0.562563	0	0
184	snoRNA:185	0	0	0	0	2.96138	0	0
185	Cp19	0	0	0	0	0.60236	0	0.546073
186	CG1678	0	0	0	0.105793	6.48283	0	0.310198

## Sheet: Phax_Smn_overlap
Supplemental Table S2: Overlapping changes in differential expression between PhaxSH/SH and SmnX7/D mutants.
	gene(s)	locus	sample_1	sample_2	status	value_1	value_2	delta FPKM	log2(fold_change)	test_stat	p_value	q_value	significant
1	Obp99a	chr3R:25497381-25498056	Smn	Ore-R	OK	26.7741	428.974	402.2	4.00198	6.89495	5e-05	0.00120009	yes
2	Oat	chr3L:19640375-19642949	Smn	Ore-R	OK	14.3024	242.648	228.346	4.08453	7.18464	5e-05	0.00120009	yes
3	CG3292	chr2R:18091198-18093081	Smn	Ore-R	OK	0.402166	83.6852	83.283	7.70104	8.94639	5e-05	0.00120009	yes
4	deltaTry	chr2R:7242837-7243998	Smn	Ore-R	OK	36.1734	111.591	75.4176	1.62521	2.96109	5e-05	0.00120009	yes
5	CG18417	chr3L:7393176-7394773	Smn	Ore-R	OK	0.47982	13.5683	13.0885	4.8216	5.46154	5e-05	0.00120009	yes
6	Cirl	chr2R:4502207-4512776	Smn	Ore-R	OK	7.76977	19.7972	12.0274	1.34935	2.48005	0.00055	0.00899017	yes
7	Ugt86Di	chr3R:6976719-6979571	Smn	Ore-R	OK	6.45637	1.36754	-5.08883	-2.23914	-2.80567	0.0012	0.0166684	yes
8	CG12224	chr3R:7806303-7808439	Smn	Ore-R	OK	21.9816	7.37566	-14.6059	-1.57545	-2.51842	0.00075	0.0114911	yes
9	CG2065	chr2R:3551073-3552776	Smn	Ore-R	OK	23.4866	6.96847	-16.5181	-1.75292	-2.89096	0.00025	0.00473139	yes
10	CG14907	chr3R:12475702-12478029	Smn	Ore-R	OK	29.6576	10.8166	-18.841	-1.45515	-2.81733	0.00015	0.00309809	yes
11	Mocs1	chr3L:11063682-11066448	Smn	Ore-R	OK	36.6495	6.40311	-30.2464	-2.51695	-4.48933	5e-05	0.00120009	yes
12	Cyp6d2	chr2R:18540077-18542032	Smn	Ore-R	OK	54.9218	20.9113	-34.0105	-1.3931	-2.49361	0.0004	0.00696173	yes
13	CG31793	chr2L:19003409-19008231	Smn	Ore-R	OK	47.4076	5.56439	-41.8432	-3.09082	-5.35129	5e-05	0.00120009	yes
14	CG7720	chr3R:14584949-14620887	Smn	Ore-R	OK	62.5215	19.7969	-42.7246	-1.65908	-3.11182	5e-05	0.00120009	yes
15	CG8620	chr3L:7151198-7152010	Smn	Ore-R	OK	76.7094	4.80149	-71.9079	-3.99785	-5.70569	5e-05	0.00120009	yes
16	lcs	chrX:21267753-21268326	Smn	Ore-R	OK	81.252	5.86627	-75.3857	-3.79189	-5.26797	5e-05	0.00120009	yes
17	Cyp28d2	chr2L:5207307-5209345	Smn	Ore-R	OK	93.7635	10.9174	-82.8461	-3.10239	-5.35877	5e-05	0.00120009	yes
18	CG12766	chr3L:3938623-3940084	Smn	Ore-R	OK	101.662	4.652	-97.01	-4.44978	-5.89938	5e-05	0.00120009	yes
19	CG31288	chr3R:21121849-21128076	Smn	Ore-R	OK	157.138	52.0183	-105.12	-1.59494	-2.22163	0.00485	0.0486827	yes
20	CG9928	chr2L:13142480-13142902	Smn	Ore-R	OK	164.815	9.15529	-155.66	-4.1701	-5.28926	5e-05	0.00120009	yes
21	CG2064	chr2R:3553334-3556534	Smn	Ore-R	OK	273.832	96.1826	-177.649	-1.50945	-2.53474	0.0004	0.00696173	yes
22	CG5550	chr2R:12704091-12706775	Smn	Ore-R	OK	219.171	40.2282	-178.943	-2.44577	-4.11268	5e-05	0.00120009	yes
23	CG10638	chr3L:12491503-12494411	Smn	Ore-R	OK	252.067	62.7819	-189.285	-2.00539	-3.63133	5e-05	0.00120009	yes
24	CG33267,CG7394	chr3L:11555755-11565805	Smn	Ore-R	OK	362.119	54.5862	-307.533	-2.72985	-4.10474	5e-05	0.00120009	yes
25	CG15784	chrX:5322403-5326546	Smn	Ore-R	OK	611.931	168.725	-443.206	-1.85869	-2.95267	0.0001	0.00219251	yes
26	Bace	chr2L:8491867-8506845	Smn	Ore-R	OK	477.506	29.3384	-448.168	-4.02466	-6.08413	5e-05	0.00120009	yes
27	CG10911	chr2R:13940052-13941569	Smn	Ore-R	OK	1040.71	212.229	-828.481	-2.29387	-3.67877	5e-05	0.00120009	yes
28	Arc1,CG10102	chr2R:10245306-10250330	Smn	Ore-R	OK	3270.54	593.255	-2677.28	-2.4628	-3.78103	5e-05	0.00120009	yes
1	Obp99a	chr3R:25497381-25498056	Phax	Ore-R	OK	54.8102	428.974	374.164	2.96837	5.37398	5e-05	0.00120009	yes
2	Oat	chr3L:19640375-19642949	Phax	Ore-R	OK	22.9171	242.648	219.731	3.40437	6.19241	5e-05	0.00120009	yes
3	CG3292	chr2R:18091198-18093081	Phax	Ore-R	OK	0.274588	83.6852	83.4106	8.25156	8.18644	5e-05	0.00120009	yes
4	deltaTry	chr2R:7242837-7243998	Phax	Ore-R	OK	30.1539	111.591	81.4371	1.8878	3.39804	5e-05	0.00120009	yes
5	CG18417	chr3L:7393176-7394773	Phax	Ore-R	OK	2.44122	13.5683	11.1271	2.47457	3.4346	5e-05	0.00120009	yes
6	Cirl	chr2R:4502207-4512776	Phax	Ore-R	OK	9.18404	19.7972	10.6132	1.10809	2.01674	0.00455	0.0464374	yes
7	Ugt86Di	chr3R:6976719-6979571	Phax	Ore-R	OK	11.4041	1.36754	-10.0366	-3.05991	-4.07084	5e-05	0.00120009	yes
8	CG12224	chr3R:7806303-7808439	Phax	Ore-R	OK	87.8526	7.37566	-80.4769	-3.57424	-5.85191	5e-05	0.00120009	yes
9	CG2065	chr2R:3551073-3552776	Phax	Ore-R	OK	29.3901	6.96847	-22.4216	-2.07642	-3.45169	5e-05	0.00120009	yes
10	CG14907	chr3R:12475702-12478029	Phax	Ore-R	OK	65.7098	10.8166	-54.8932	-2.60286	-4.92925	5e-05	0.00120009	yes
11	Mocs1	chr3L:11063682-11066448	Phax	Ore-R	OK	66.3412	6.40311	-59.9381	-3.37306	-5.90062	5e-05	0.00120009	yes
12	Cyp6d2	chr2R:18540077-18542032	Phax	Ore-R	OK	92.7492	20.9113	-71.8379	-2.14905	-3.97982	5e-05	0.00120009	yes
13	CG31793	chr2L:19003409-19008231	Phax	Ore-R	OK	45.3386	5.56439	-39.7742	-3.02644	-5.2831	5e-05	0.00120009	yes
14	CG7720	chr3R:14584949-14620887	Phax	Ore-R	OK	71.0602	19.7969	-51.2633	-1.84377	-3.38243	5e-05	0.00120009	yes
15	CG8620	chr3L:7151198-7152010	Phax	Ore-R	OK	173.712	4.80149	-168.911	-5.17707	-7.20799	5e-05	0.00120009	yes
16	lcs	chrX:21267753-21268326	Phax	Ore-R	OK	60.1422	5.86627	-54.2759	-3.35786	-4.53486	5e-05	0.00120009	yes
17	Cyp28d2	chr2L:5207307-5209345	Phax	Ore-R	OK	1.16858	10.9174	9.74882	3.2238	4.1088	5e-05	0.00120009	yes
18	CG12766	chr3L:3938623-3940084	Phax	Ore-R	OK	161.204	4.652	-156.552	-5.1149	-6.67955	5e-05	0.00120009	yes
19	CG31288	chr3R:21121849-21128076	Phax	Ore-R	OK	425.206	52.0183	-373.188	-3.03107	-4.1707	5e-05	0.00120009	yes
20	CG9928	chr2L:13142480-13142902	Phax	Ore-R	OK	256.967	9.15529	-247.812	-4.81083	-6.0422	5e-05	0.00120009	yes
21	CG2064	chr2R:3553334-3556534	Phax	Ore-R	OK	288.989	96.1826	-192.806	-1.58716	-2.62954	0.0004	0.00696173	yes
22	CG5550	chr2R:12704091-12706775	Phax	Ore-R	OK	154.468	40.2282	-114.24	-1.94103	-3.31391	5e-05	0.00120009	yes
23	CG10638	chr3L:12491503-12494411	Phax	Ore-R	OK	363.317	62.7819	-300.535	-2.53281	-4.49887	5e-05	0.00120009	yes
24	CG33267,CG7394	chr3L:11555755-11565805	Phax	Ore-R	OK	473.741	54.5862	-419.155	-3.11749	-4.61628	5e-05	0.00120009	yes
25	CG15784	chrX:5322403-5326546	Phax	Ore-R	OK	1300.96	168.725	-1132.24	-2.94683	-4.67946	5e-05	0.00120009	yes
26	Bace	chr2L:8491867-8506845	Phax	Ore-R	OK	162.022	29.3384	-132.684	-2.46533	-3.83717	0.00015	0.00309809	yes
27	CG10911	chr2R:13940052-13941569	Phax	Ore-R	OK	829.848	212.229	-617.619	-1.96722	-3.18876	5e-05	0.00120009	yes
28	Arc1,CG10102	chr2R:10245306-10250330	Phax	Ore-R	OK	3606.55	593.255	-3013.3	-2.6039	-4.05187	5e-05	0.00120009	yes

## Sheet: Smn_only
Supplemental Table S3: SmnX7/D-specific changes in mRNA expression.
	gene(s)	locus	sample_1	sample_2	status	value_1	value_2	delta FPKM	log2(fold_change)	test_stat	p_value	q_value	significant
1	CG15394	chr2L:2588853-2592775	Smn	Ore-R	OK	24.6342	2.82499	-21.8092	-3.12435	-3.26783	0.00085	0.0126988	yes
2	CG9505	chr2L:6367883-6370195	Smn	Ore-R	OK	19.9409	4.58189	-15.359	-2.12171	-3.70977	5e-05	0.00120009	yes
3	d	chr2L:8466827-8488752	Smn	Ore-R	OK	0.626518	4.84824	4.22172	2.95203	4.209	5e-05	0.00120009	yes
4	CG18661,Try29F	chr2L:8997640-8999468	Smn	Ore-R	OK	31.3948	6.87043	-24.5244	-2.19205	-3.11208	0.0002	0.00392609	yes
5	CG42791	chr2L:15863261-15863663	Smn	Ore-R	OK	0.837112	0	-0.837112	inf	nan	0.00135	0.0182351	yes
6	ds	chr2L:640020-714968	Smn	Ore-R	OK	0.396898	1.85057	1.45367	2.22113	3.39108	5e-05	0.00120009	yes
7	CG34043	chr2L:10278950-10280846	Smn	Ore-R	OK	44.045	10.3841	-33.6609	-2.0846	-3.67262	5e-05	0.00120009	yes
8	TepI	chr2L:15888638-15893811	Smn	Ore-R	OK	27.8398	8.29235	-19.5474	-1.7473	-3.42368	5e-05	0.00120009	yes
9	CG6639	chr2L:17452923-17458775	Smn	Ore-R	OK	238.273	32.8353	-205.438	-2.8593	-3.13447	0.0003	0.00550104	yes
10	Dro	chr2R:10633460-10633821	Smn	Ore-R	OK	256.128	74.1511	-181.977	-1.78832	-2.96811	0.0004	0.00696173	yes
11	GalNAc-T1	chr2R:11399217-11403102	Smn	Ore-R	OK	12.801	28.2866	15.4856	1.14386	2.05153	0.0031	0.0350352	yes
12	CG18431,CG4844	chr2R:13389747-13396150	Smn	Ore-R	OK	9.81723	77.9842	68.167	2.98979	5.36277	5e-05	0.00120009	yes
13	IM3	chr2R:14275624-14275995	Smn	Ore-R	OK	641.162	25.0709	-616.091	-4.6766	-6.36072	5e-05	0.00120009	yes
14	Obp56a	chr2R:15585227-15586015	Smn	Ore-R	OK	115.74	329.699	213.959	1.51027	2.82376	5e-05	0.00120009	yes
15	Obp46a	chr2R:6198676-6199528	Smn	Ore-R	OK	0	0.644346	0.644346	inf	nan	5e-05	0.00120009	yes
16	CG42807	chr2R:9459028-9460045	Smn	Ore-R	OK	1036.46	227.771	-808.689	-2.18601	-3.69709	5e-05	0.00120009	yes
17	Cyp6a8	chr2R:10774675-10776514	Smn	Ore-R	OK	14.1415	254.02	239.879	4.16693	7.19577	5e-05	0.00120009	yes
18	CG30080,CG42662	chr2R:11586230-11589199	Smn	Ore-R	OK	34.2454	7.32039	-26.925	-2.22592	-3.58041	5e-05	0.00120009	yes
19	ppk6	chr2R:16133275-16135078	Smn	Ore-R	OK	31.351	0.481565	-30.8694	-6.02464	-7.12914	5e-05	0.00120009	yes
20	CG30151	chr2R:16416008-16416969	Smn	Ore-R	OK	33.972	13.1015	-20.8705	-1.37462	-2.44345	0.001	0.014442	yes
21	CG17999	chr2R:16735484-16737424	Smn	Ore-R	OK	22.5248	0.50199	-22.0228	-5.48771	-5.8918	5e-05	0.00120009	yes
22	IM4	chr2R:16756341-16756826	Smn	Ore-R	OK	154.615	16.0566	-138.558	-3.26744	-4.73586	5e-05	0.00120009	yes
23	CG12734,CG32284,CG42494	chr3L:3178904-3187245	Smn	Ore-R	OK	582.74	118.033	-464.707	-2.30366	-3.06361	5e-05	0.00120009	yes
24	CG4835	chr3L:5472847-5476796	Smn	Ore-R	OK	44.7737	18.0495	-26.7242	-1.31069	-2.23477	0.00205	0.0253318	yes
25	CG14120	chr3L:12878151-12882355	Smn	Ore-R	OK	97.6318	36.733	-60.8988	-1.41028	-2.20212	0.0021	0.0258398	yes
26	ImpE2	chr3L:3510973-3512677	Smn	Ore-R	OK	1.4308	8.51256	7.08176	2.57277	3.25161	5e-05	0.00120009	yes
27	Ucrh	chr3LHet:606164-611589	Smn	Ore-R	OK	207.625	754.303	546.678	1.86116	3.24937	5e-05	0.00120009	yes
28	CG17374	chr3LHet:1135431-1145645	Smn	Ore-R	OK	1.26844	9.01849	7.75005	2.82983	4.17634	5e-05	0.00120009	yes
29	CG5302	chr3R:11458604-11464977	Smn	Ore-R	OK	0.522389	0	-0.522389	inf	nan	5e-05	0.00120009	yes
30	rtet	chr3R:16934169-16936554	Smn	Ore-R	OK	2.96631	15.7532	12.7869	2.4089	3.43599	5e-05	0.00120009	yes
31	CG31436	chr3R:21129898-21131373	Smn	Ore-R	OK	18.5287	7.81558	-10.7131	-1.24534	-2.07633	0.00285	0.0328472	yes
32	CG1969	chr3R:25565566-25567674	Smn	Ore-R	OK	32.2161	70.3707	38.1546	1.1272	2.19566	0.00285	0.0328472	yes
33	CG4860	chr3R:8045602-8047848	Smn	Ore-R	OK	1.57678	16.8948	15.318	3.42152	4.4693	5e-05	0.00120009	yes
34	Cys	chr3R:10394752-10395363	Smn	Ore-R	OK	240.288	606.393	366.105	1.33549	2.37387	0.00105	0.0150069	yes
35	CG14291	chr3R:14736772-14738641	Smn	Ore-R	OK	5.42309	14.1923	8.76921	1.38792	2.328	0.00105	0.0150069	yes
36	CG10562	chr3R:21146774-21148473	Smn	Ore-R	OK	23.823	3.94406	-19.8789	-2.59461	-3.77675	5e-05	0.00120009	yes
37	CG15369	chrX:9110925-9111401	Smn	Ore-R	OK	3.75949	801.631	797.872	7.73626	8.93437	5e-05	0.00120009	yes
38	NAAT1	chrX:5299264-5304878	Smn	Ore-R	OK	36.6272	11.7134	-24.9138	-1.64476	-3.18043	5e-05	0.00120009	yes

## Sheet: Ars2_only
Supplemental Table S4: Ars2C/E-specific changes in mRNA expression.
	gene(s)	locus	sample_1	sample_2	status	value_1	value_2	delta FPKM	log2(fold_change)	test_stat	p_value	q_value	significant
1	v(2)k05816	chr2L:3043972-3055601	Ars2	Ore-R	OK	35.9189	1.77928	-34.1396	-4.33538	-6.99076	5e-05	0.00120009	yes
2	MRP	chr2L:12713275-12744809	Ars2	Ore-R	OK	136.891	25.473	-111.418	-2.42599	-3.28461	0.00025	0.00473139	yes
3	CG34394	chr2L:3358626-3373410	Ars2	Ore-R	OK	21.3629	9.24907	-12.1138	-1.20773	-2.23962	0.0019	0.0238773	yes
4	Acp29AB	chr2L:8392472-8393239	Ars2	Ore-R	OK	0.562563	0	-0.562563	inf	nan	0.0001	0.00219251	yes
5	CG9426	chr2L:13216289-13219933	Ars2	Ore-R	OK	25.4033	5.44472	-19.9586	-2.22209	-4.14984	5e-05	0.00120009	yes
6	CycE	chr2L:15727761-15748155	Ars2	Ore-R	OK	13.3745	4.71351	-8.66099	-1.50461	-2.76434	0.00035	0.00622606	yes
7	CG5953	chr2L:16507970-16534662	Ars2	Ore-R	OK	14.1902	4.95752	-9.23268	-1.51721	-2.46427	0.00085	0.0126988	yes
8	CG10621	chr2L:18952205-18954425	Ars2	Ore-R	OK	54.4717	232.043	177.571	2.09081	3.80277	5e-05	0.00120009	yes
9	CG17082	chr2R:631835-645547	Ars2	Ore-R	OK	75.1565	35.1214	-40.0351	-1.09755	-2.05114	0.00455	0.0464374	yes
10	Su(z)2	chr2R:8884029-8895307	Ars2	Ore-R	OK	10.6844	1.10926	-9.57514	-3.26784	-5.44806	5e-05	0.00120009	yes
11	Cyp6a17	chr2R:10761458-10763063	Ars2	Ore-R	OK	3.27805	34.9733	31.6953	3.41534	5.12021	5e-05	0.00120009	yes
12	CG33225	chr2R:17477815-17479089	Ars2	Ore-R	OK	64.4829	25.9906	-38.4923	-1.31093	-2.09721	0.00415	0.0434042	yes
13	CG13560	chr2R:19635095-19635741	Ars2	Ore-R	OK	16.4597	1106.45	1089.99	6.07085	8.93733	5e-05	0.00120009	yes
14	Cyp6a2	chr2R:2649413-2687098	Ars2	Ore-R	OK	334.836	25.2411	-309.595	-3.72961	-5.80499	5e-05	0.00120009	yes
15	CG9447	chr2R:2760836-2763118	Ars2	Ore-R	OK	5.41376	0.879965	-4.53379	-2.62111	-2.88032	0.0008	0.012115	yes
16	CG12769	chr2R:3939584-3953056	Ars2	Ore-R	OK	30.8483	0.104967	-30.7433	-8.19911	-8.86249	5e-05	0.00120009	yes
17	CG18278	chr2R:9294510-9297458	Ars2	Ore-R	OK	0	0.882145	0.882145	inf	nan	5e-05	0.00120009	yes
18	snoRNA:185	chr2R:15613989-15614712	Ars2	Ore-R	OK	2.96138	0	-2.96138	inf	nan	5e-05	0.00120009	yes
19	CG40263	chr2RHet:1265403-1336065	Ars2	Ore-R	OK	3.34778	39.4524	36.1046	3.55884	4.82828	5e-05	0.00120009	yes
20	Cp19	chr3L:8722964-8723704	Ars2	Ore-R	OK	0.60236	0	-0.60236	inf	nan	0.0004	0.00696173	yes
21	CG6996	chr3L:20200626-20202249	Ars2	Ore-R	OK	84.6577	38.8603	-45.7974	-1.12335	-2.04385	0.0044	0.0452968	yes
22	CG17352	chr3L:8345454-8349396	Ars2	Ore-R	OK	14.658	0.967977	-13.69	-3.92057	-5.52025	5e-05	0.00120009	yes
23	CG5830	chr3L:15985757-15998240	Ars2	Ore-R	OK	32.9455	16.2875	-16.658	-1.01631	-2.04457	0.00345	0.0379315	yes
24	CG40160	chr3LHet:1562330-1577458	Ars2	Ore-R	OK	6.82875	40.3876	33.5588	2.56422	3.81832	5e-05	0.00120009	yes
25	CG1208,glob3	chr3R:1655783-1664504	Ars2	Ore-R	OK	5.12323	50.1933	45.0701	3.29237	4.7805	5e-05	0.00120009	yes
26	Ugt86Dc	chr3R:6980376-6982235	Ars2	Ore-R	OK	19.8159	0.148878	-19.667	-7.05638	-6.2736	0.0033	0.0366756	yes
27	CG18437	chr3R:23486999-23502818	Ars2	Ore-R	OK	13.1221	0.300092	-12.822	-5.45045	-7.52894	5e-05	0.00120009	yes
28	CG14606	chr3R:3040060-3042913	Ars2	Ore-R	OK	27.6787	7.60029	-20.0784	-1.86465	-3.27194	5e-05	0.00120009	yes
29	Poxm	chr3R:4142670-4159514	Ars2	Ore-R	OK	53.9253	15.973	-37.9523	-1.75533	-2.91493	5e-05	0.00120009	yes
30	alphagamma-element:CR32865	chr3R:8299785-8304020	Ars2	Ore-R	OK	132.423	37.6818	-94.7412	-1.81322	-3.21717	5e-05	0.00120009	yes
31	CG31224	chr3R:14470176-14485081	Ars2	Ore-R	OK	24.8737	4.64216	-20.2315	-2.42175	-4.52538	5e-05	0.00120009	yes
32	CG4465	chr3R:15741589-15743562	Ars2	Ore-R	OK	0.969116	6.55692	5.5878	2.75828	3.41187	0.00015	0.00309809	yes
33	PPP4R2r	chrX:10372865-10375977	Ars2	Ore-R	OK	4.67654	23.9843	19.3078	2.35858	4.30713	5e-05	0.00120009	yes
34	CG2543	chrX:12505946-12509563	Ars2	Ore-R	OK	22.4742	7.39163	-15.0826	-1.6043	-2.83075	0.0002	0.00392609	yes
35	CG14205	chrX:19486644-19489581	Ars2	Ore-R	OK	217.356	28.3845	-188.971	-2.93688	-4.58338	5e-05	0.00120009	yes
36	CG3857	chrX:1831730-1834040	Ars2	Ore-R	OK	32.265	3.04246	-29.2225	-3.40666	-5.47773	5e-05	0.00120009	yes
37	vanin-like	chrX:6094219-6096592	Ars2	Ore-R	OK	295.488	85.2423	-210.246	-1.79346	-2.77703	0.0002	0.00392609	yes
38	CG14219	chrX:19481389-19485739	Ars2	Ore-R	OK	140.031	3.1643	-136.867	-5.46771	-8.16247	5e-05	0.00120009	yes
39	CG1678	chrX:21273399-21273765	Ars2	Ore-R	OK	6.48283	0	-6.48283	inf	nan	5e-05	0.00120009	yes
