# Supplementary material
Source: HighWire-hosted journal article supplement (doi:10.1101/rna.057208.116)
Supplement: Supplemental_Tables_S5-S8.xlsx [file Supplemental_Tables_S5-S8.xlsx]

## Sheet: Phax_Smn_overlap
Supplemental Table S5: Overlapping mRNA length differences between PhaxSH/SH and SmnX7/D mutants.
	>2-fold Shortened						>2-fold Lengthened
		Mean_PDUI		PDUI				Mean_PDUI		PDUI
	Gene	OregonR	Smn	Group_diff			Gene	OregonR	Smn	Group_diff
1	NM_134928|CG9662|chr2L|-	1	0.15	-0.85		1	NM_139444|CG9018|chr3L|-	0.49	1	0.51
2	NM_001202200|CG33255|chr3L|+	1	0.24	-0.76		2	NM_001274523|CG5537|chr3L|+	0.47	1	0.53
3	NM_140161|Cpr67Fa1|chr3L|+	1	0.27	-0.73		3	NM_001260447|Npc2h|chr3R|-	0.29	0.89	0.6
4	NM_143627|CG11563|chr3R|+	0.93	0.26	-0.67		4	NM_138060|CG3376|chr2R|+	0.38	1	0.62
5	NM_132527|CG10347|chrX|-	0.83	0.19	-0.64		5	NM_001273086|CG3714|chr2L|-	0.07	0.71	0.64
6	NM_206518|Pk92B|chr3R|+	0.94	0.33	-0.61		6	NM_132526|p24-1|chrX|-	0.17	0.96	0.79
7	NM_057741|Pk92B|chr3R|+	0.94	0.33	-0.61		7	NM_140443|CG13482|chr3L|+	0.14	1	0.86
8	NM_001201882|CG15282|chr2L|+	0.73	0.14	-0.59		8	NM_001169813|CG42568|chr2R|-	0.09	1	0.91
9	NM_166156|mrj|chr2R|-	0.9	0.31	-0.59		9	NM_134574|CG1304|chrX|-	0.02	1	0.98
10	NM_165494|coro|chr2R|-	0.8	0.22	-0.58
11	NM_139770|loj|chr3L|+	0.74	0.16	-0.58				Mean_PDUI		PDUI
12	NM_142960|CG5463|chr3R|-	0.77	0.19	-0.58			Gene	OregonR	Phax	Group_diff
13	NM_079079|Acox57D-d|chr2R|+	0.77	0.2	-0.57			NM_139444|CG9018|chr3L|-	0.5	1	0.5
14	NM_080048|L|chr2R|+	0.93	0.36	-0.57			NM_001274523|CG5537|chr3L|+	0.47	1	0.53
15	NM_137979|CG13560|chr2R|+	0.97	0.41	-0.56			NM_001260447|Npc2h|chr3R|-	0.29	0.92	0.63
16	NM_001273095|l(2)k05819|chr2L|+	0.72	0.16	-0.56			NM_138060|CG3376|chr2R|+	0.4	1	0.6
17	NM_142592|CG4462|chr3R|-	0.74	0.18	-0.56			NM_001273086|CG3714|chr2L|-	0.07	0.76	0.69
18	NM_057594|cact|chr2L|-	0.82	0.27	-0.55			NM_132526|p24-1|chrX|-	0.17	0.92	0.75
19	NM_001169624|Pkn|chr2R|-	0.85	0.3	-0.55			NM_140443|CG13482|chr3L|+	0.14	1	0.86
20	NM_080496|mtSSB|chr3R|-	0.7	0.16	-0.54			NM_001169813|CG42568|chr2R|-	0.09	1	0.91
21	NM_143796|Vps28|chr2R|-	1	0.47	-0.53			NM_134574|CG1304|chrX|-	0.25	1	0.75
22	NM_134885|CG8814|chr2L|+	0.8	0.29	-0.51
23	NM_141660|bocksbeutel|chr3R|-	1	0.49	-0.51
24	NM_080244|Peritrophin-15a|chr2L|-	0.72	0.22	-0.5
25	NM_143711|Ref1|chr3R|-	0.79	0.29	-0.5
		Mean_PDUI		PDUI
	Gene	OregonR	Phax	Group_diff
	NM_134928|CG9662|chr2L|-	1	0.04	-0.96
	NM_001202200|CG33255|chr3L|+	1	0.06	-0.94
	NM_140161|Cpr67Fa1|chr3L|+	1	0.33	-0.67
	NM_143627|CG11563|chr3R|+	0.93	0.37	-0.56
	NM_132527|CG10347|chrX|-	0.83	0.28	-0.55
	NM_206518|Pk92B|chr3R|+	0.94	0.44	-0.5
	NM_057741|Pk92B|chr3R|+	0.94	0.44	-0.5
	NM_001201882|CG15282|chr2L|+	0.73	0.23	-0.5
	NM_166156|mrj|chr2R|-	0.89	0.37	-0.52
	NM_165494|coro|chr2R|-	0.8	0.27	-0.53
	NM_139770|loj|chr3L|+	0.74	0.19	-0.55
	NM_142960|CG5463|chr3R|-	0.77	0.26	-0.51
	NM_079079|Acox57D-d|chr2R|+	0.8	0.11	-0.69
	NM_080048|L|chr2R|+	0.93	0.27	-0.66
	NM_137979|CG13560|chr2R|+	0.87	0.33	-0.54
	NM_001273095|l(2)k05819|chr2L|+	0.72	0.18	-0.54
	NM_142592|CG4462|chr3R|-	0.75	0.18	-0.57
	NM_057594|cact|chr2L|-	0.82	0.31	-0.51
	NM_001169624|Pkn|chr2R|-	0.8	0.22	-0.58
	NM_080496|mtSSB|chr3R|-	0.7	0.19	-0.51
	NM_143796|Vps28|chr2R|-	1	0.46	-0.54
	NM_134885|CG8814|chr2L|+	0.8	0.3	-0.5
	NM_141660|bocksbeutel|chr3R|-	1	0.49	-0.51
	NM_080244|Peritrophin-15a|chr2L|-	0.72	0.18	-0.54
	NM_143711|Ref1|chr3R|-	0.8	0.29	-0.51

## Sheet: Phax
Supplemental Table S6: Significant mRNA length differences in PhaxSH/SH mutants.
<2-fold					>2-fold Shortened					>2-fold Lengthened
	Mean_PDUI		PDUI			Mean_PDUI		PDUI			Mean_PDUI		PDUI
Gene	OregonR	Phax	Group_diff		Gene	OregonR	Phax	Group_diff		Gene	OregonR	Phax	Group_diff
NM_135296|CG13796|chr2L|-	0.87	0.38	-0.49		NM_134928|CG9662|chr2L|-	1	0.04	-0.96		NM_139444|CG9018|chr3L|-	0.5	1	0.5
NM_137717|Lapsyn|chr2R|+	1	0.51	-0.49		NM_001202200|CG33255|chr3L|+	1	0.06	-0.94		NM_001274523|CG5537|chr3L|+	0.47	1	0.53
NM_135146|CG9147|chr2L|+	1	0.51	-0.49		NM_001273068|CG9662|chr2L|-	0.89	0.05	-0.84		NM_143458|CG7593|chr3R|-	0.45	1	0.55
NM_167310|CG10347|chrX|-	0.74	0.25	-0.49		NM_001032048|GlyP|chr2L|+	0.9	0.14	-0.76		NM_001275224|CG7324|chr3L|-	0.43	1	0.57
NM_169877|CG4662|chr3R|+	0.94	0.45	-0.49		NM_132790|CG9123|chrX|-	1	0.26	-0.74		NM_142329|CG3590|chr3R|-	0.41	1	0.59
NM_139677|CG13707|chr3L|-	0.69	0.2	-0.49		NM_134959|CG2816|chr2L|+	1	0.3	-0.7		NM_138060|CG3376|chr2R|+	0.4	1	0.6
NM_137441|Muc55B|chr2R|-	1	0.52	-0.48		NM_079079|Acox57D-d|chr2R|+	0.8	0.11	-0.69		NM_167083|Pink1|chrX|+	0.28	0.9	0.62
NM_168663|CG4729|chr3L|-	0.85	0.37	-0.48		NM_140161|Cpr67Fa1|chr3L|+	1	0.33	-0.67		NM_165219|dl|chr2L|-	0.38	1	0.62
NM_135866|l(2)34Fc|chr2L|-	0.89	0.41	-0.48		NM_080048|L|chr2R|+	0.93	0.27	-0.66		NM_001260447|Npc2h|chr3R|-	0.29	0.92	0.63
NM_001104347|CG34278|chr3R|+	0.74	0.26	-0.48		NM_144151|CG14104|chr3L|-	0.9	0.28	-0.62		NM_001273086|CG3714|chr2L|-	0.07	0.76	0.69
NM_130493|CG13365|chrX|-	1	0.52	-0.48		NM_141638|GstZ2|chr3R|-	1	0.39	-0.61		NM_137559|CG10476|chr2R|-	0.25	0.96	0.71
NM_167994|CG32280|chr3L|+	0.83	0.35	-0.48		NM_001273376|CG4594|chr2L|+	0.7	0.1	-0.6		NM_132526|p24-1|chrX|-	0.17	0.92	0.75
NM_165425|d4|chr2R|+	1	0.52	-0.48		NM_138235|CG13912|chr3L|+	0.91	0.31	-0.6		NM_134574|CG1304|chrX|-	0.25	1	0.75
NM_001032272|CG33785|chr2R|-	0.86	0.38	-0.48		NR_048372|CR43283|chr3R|-	0.77	0.18	-0.59		NM_001038895|CG33966|chr3L|+	0.22	1	0.78
NM_135512|CG4901|chr2L|+	1	0.52	-0.48		NM_001169624|Pkn|chr2R|-	0.8	0.22	-0.58		NM_165656|CG30345|chr2R|+	0.18	1	0.82
NM_001260349|CG18428|chr3R|+	0.87	0.39	-0.48		NM_165939|CG42708|chr2R|-	0.73	0.16	-0.57		NM_140443|CG13482|chr3L|+	0.14	1	0.86
NM_137696|CG15653|chr2R|-	0.67	0.19	-0.48		NM_142592|CG4462|chr3R|-	0.75	0.18	-0.57		NM_137486|GstE8|chr2R|+	0.11	1	0.89
NM_001260365|CG43273|chr3R|+	0.79	0.31	-0.48		NM_001169989|Oatp74D|chr3L|+	0.71	0.15	-0.56		NM_001169813|CG42568|chr2R|-	0.09	1	0.91
NM_001170148|Tm1|chr3R|+	0.79	0.32	-0.47		NM_143627|CG11563|chr3R|+	0.93	0.37	-0.56
NM_136572|CG13751|chr2R|+	1	0.53	-0.47		NM_139770|loj|chr3L|+	0.74	0.19	-0.55
NM_001272963|Der-1|chr2L|+	0.99	0.52	-0.47		NM_132527|CG10347|chrX|-	0.83	0.28	-0.55
NM_141571|CG8223|chr3R|+	0.83	0.36	-0.47		NM_080244|Peritrophin-15a|chr2L|-	0.72	0.18	-0.54
NM_166593|CG30413|chr2R|-	0.82	0.35	-0.47		NM_137979|CG13560|chr2R|+	0.87	0.33	-0.54
NM_136237|CG9265|chr2L|-	1	0.53	-0.47		NM_143796|Vps28|chr2R|-	1	0.46	-0.54
NM_001031902|Shawn|chrX|+	0.83	0.36	-0.47		NM_001273095|l(2)k05819|chr2L|+	0.72	0.18	-0.54
NM_001031901|Shawn|chrX|+	0.84	0.37	-0.47		NM_137248|CG8435|chr2R|-	0.89	0.35	-0.54
NM_001032241|CG33671|chr2R|-	0.98	0.52	-0.46		NM_165494|coro|chr2R|-	0.8	0.27	-0.53
NM_001038751|Vago|chrX|+	0.92	0.46	-0.46		NM_136508|Cul-4|chr2R|-	1	0.47	-0.53
NM_142463|Vha100-4|chr3R|-	0.57	0.11	-0.46		NM_137045|CG42807|chr2R|-	0.82	0.3	-0.52
NM_136486|CG12159|chr2R|-	0.86	0.4	-0.46		NM_166156|mrj|chr2R|-	0.89	0.37	-0.52
NM_001273956|Vhl|chr2R|+	1	0.54	-0.46		NM_206468|GstZ2|chr3R|-	1	0.48	-0.52
NM_132936|CG4768|chrX|+	1	0.54	-0.46		NM_140185|CG14143|chr3L|+	1	0.49	-0.51
NM_137660|CG16799|chr2R|-	0.52	0.07	-0.45		NM_137982|CG5532|chr2R|+	0.82	0.31	-0.51
NM_001202209|CG42833|chr3L|+	0.88	0.43	-0.45		NM_143711|Ref1|chr3R|-	0.8	0.29	-0.51
NM_141205|CG14646|chr3R|+	1	0.55	-0.45		NM_080496|mtSSB|chr3R|-	0.7	0.19	-0.51
NM_001275149|Mi-2|chr3L|-	0.79	0.34	-0.45		NM_057594|cact|chr2L|-	0.82	0.31	-0.51
NM_137047|CG6197|chr2R|+	0.96	0.51	-0.45		NM_141660|bocksbeutel|chr3R|-	1	0.49	-0.51
NM_001274091|Asph|chr2R|+	0.83	0.38	-0.45		NM_176103|CG14764|chr2R|-	0.68	0.17	-0.51
NM_167805|CG16940|chr3L|+	0.78	0.33	-0.45		NM_142960|CG5463|chr3R|-	0.77	0.26	-0.51
NM_167552|CG4928|chrX|+	1	0.56	-0.44		NM_001201882|CG15282|chr2L|+	0.73	0.23	-0.5
NM_176585|janA|chr3R|-	0.56	0.12	-0.44		NM_132711|CG1368|chrX|+	0.94	0.44	-0.5
NM_001169772|CG42496|chr2R|+	0.59	0.15	-0.44		NM_079013|mRpS16|chr2R|-	0.56	0.06	-0.5
NM_001272653|sd|chrX|+	1	0.56	-0.44		NM_137684|CG9344|chr2R|+	0.52	0.02	-0.5
NM_165687|CG30339|chr2R|-	0.75	0.31	-0.44		NM_134885|CG8814|chr2L|+	0.8	0.3	-0.5
NM_001170202|CG5919|chr3R|+	0.84	0.4	-0.44		NM_206228|trio|chr3L|-	0.76	0.26	-0.5
NM_079458|Ide|chr3L|-	0.63	0.19	-0.44		NM_001170083|CG8116|chr3R|+	0.87	0.37	-0.5
NM_135656|Ppt2|chr2L|+	0.65	0.21	-0.44		NM_206518|Pk92B|chr3R|+	0.94	0.44	-0.5
NM_169286|GstZ2|chr3R|-	0.78	0.34	-0.44		NM_057741|Pk92B|chr3R|+	0.94	0.44	-0.5
NM_001201995|CG6701|chr2R|-	1	0.56	-0.44		NM_001103882|mute|chr2R|-	0.91	0.41	-0.5
NM_165218|dl|chr2L|-	0.76	0.32	-0.44
NM_001042906|CG34136|chr2L|+	0.59	0.15	-0.44
NM_137390|CG6484|chr2R|-	0.96	0.52	-0.44
NM_169676|cv-d|chr3R|-	0.72	0.28	-0.44
NM_144356|Roc1b|chr3L|+	1	0.56	-0.44
NM_166855|RpL36|chrX|-	0.75	0.32	-0.43
NM_144095|Nplp4|chr2L|+	1	0.57	-0.43
NM_001273213|Galt|chr2L|-	0.89	0.46	-0.43
NM_169226|mRpS18A|chr3R|-	0.77	0.34	-0.43
NM_001169291|sd|chrX|+	1	0.57	-0.43
NM_057711|bcn92|chrX|-	0.62	0.19	-0.43
NM_001260429|CG7582|chr3R|-	0.84	0.41	-0.43
NM_001014538|CG10737|chr2R|+	0.53	0.1	-0.43
NM_144348|c12.1|chrX|-	0.81	0.38	-0.43
NM_001104254|CG8176|chr3R|+	0.73	0.3	-0.43
NM_001273220|GRHR|chr2L|-	0.73	0.3	-0.43
NM_168271|Jon66Ci|chr3L|+	1	0.58	-0.42
NM_142546|CG18493|chr3R|+	0.84	0.42	-0.42
NM_169295|Kap-alpha3|chr3R|-	1	0.58	-0.42
NM_135218|Galt|chr2L|-	0.84	0.42	-0.42
NM_130690|CG3603|chrX|+	0.84	0.42	-0.42
NM_167941|CG1275|chr3L|-	0.74	0.32	-0.42
NM_134678|CG11885|chr2L|-	1	0.58	-0.42
NM_136843|Egm|chr2R|-	1	0.58	-0.42
NM_134484|CG14210|chrX|+	0.68	0.26	-0.42
NM_138121|Eps-15|chr2R|-	0.9	0.48	-0.42
NM_166204|CG6665|chr2R|+	0.86	0.44	-0.42
NM_135973|CG6012|chr2L|-	1	0.58	-0.42
NM_001202213|CG32428|chr3L|-	0.84	0.42	-0.42
NM_138170|CG13877|chr3L|+	0.87	0.45	-0.42
NM_001202084|CG13877|chr3L|+	0.86	0.44	-0.42
NM_144281|CG9034|chrX|-	0.82	0.41	-0.41
NM_001202182|CG42728|chr3L|-	1	0.59	-0.41
NM_141354|Gasp|chr3R|-	0.85	0.44	-0.41
NM_166039|CG8468|chr2R|+	0.8	0.39	-0.41
NM_166910|Pex5|chrX|-	0.98	0.57	-0.41
NM_001014648|jar|chr3R|-	0.73	0.32	-0.41
NM_058130|Sps2|chr2L|+	0.74	0.33	-0.41
NM_138052|CG3356|chr2R|+	0.83	0.42	-0.41
NM_001103680|CG34163|chr2L|+	0.69	0.28	-0.41
NM_001275632|140up|chr3R|-	1	0.59	-0.41
NM_164317|aux|chr3R|+	1	0.59	-0.41
NM_141651|CG9393|chr3R|-	0.76	0.35	-0.41
NM_058019|Ts|chr2L|-	0.82	0.41	-0.41
NM_169801|tatl|chr3R|+	1	0.59	-0.41
NM_137327|CG6665|chr2R|+	0.84	0.43	-0.41
NM_133166|imd|chr2R|-	0.66	0.25	-0.41
NM_136175|vls|chr2L|-	0.68	0.27	-0.41
NM_001276155|CG15514|chr3R|-	0.71	0.3	-0.41
NM_132186|CG10932|chrX|-	0.82	0.42	-0.4
NM_141032|CG10512|chr3L|+	0.66	0.26	-0.4
NM_144354|SF2|chr3R|-	0.93	0.53	-0.4
NM_144101|CG5011|chr2L|+	0.55	0.15	-0.4
NM_130718|HIP|chrX|+	0.62	0.22	-0.4
NM_001273993|CG33671|chr2R|-	1	0.6	-0.4
NM_144443|CG18858|chr2L|-	0.56	0.16	-0.4
NM_143365|Noa36|chr3R|-	0.85	0.45	-0.4
NM_079661|CREG|chr3R|-	0.58	0.18	-0.4
NM_135969|mdy|chr2L|+	0.55	0.15	-0.4
NM_135801|CG9302|chr2L|-	0.5	0.1	-0.4
NM_001273471|CG34163|chr2L|+	0.69	0.29	-0.4
NM_132897|CG4301|chrX|+	0.77	0.37	-0.4
NM_079885|Pur-alpha|chr4|+	0.86	0.46	-0.4
NM_133001|CG8289|chrX|-	0.8	0.4	-0.4
NM_169338|sle|chr3R|+	0.88	0.48	-0.4
NM_142040|CG9269|chr3R|+	0.79	0.39	-0.4
NM_135420|CG13101|chr2L|-	1	0.6	-0.4
NM_136802|CG13227|chr2R|+	0.81	0.41	-0.4
NM_141480|CG2641|chr3R|+	0.81	0.41	-0.4
NM_142389|CG7655|chr3R|+	0.61	0.21	-0.4
NM_001258481|CG31998|chr4|-	0.76	0.36	-0.4
NM_143482|CG15514|chr3R|-	0.81	0.41	-0.4
NM_001274564|CG9948|chr3L|+	0.68	0.28	-0.4
NM_142710|CG16791|chr3R|-	0.74	0.34	-0.4
NM_139953|Pex2|chr3L|+	0.68	0.28	-0.4
NM_136566|PGRP-SC2|chr2R|+	0.96	0.57	-0.39
NM_165314|fbp|chr2L|-	0.99	0.6	-0.39
NM_143244|CG6403|chr3R|-	0.74	0.35	-0.39
NM_140726|CG7603|chr3L|+	0.65	0.26	-0.39
NM_135378|l(2)k12914|chr2L|-	0.88	0.49	-0.39
NM_078720|Spp|chr2L|-	0.66	0.27	-0.39
NM_137994|CG5554|chr2R|+	0.62	0.23	-0.39
NM_130593|Pex5|chrX|-	1	0.61	-0.39
NM_136325|CG10417|chr2R|-	0.9	0.51	-0.39
NM_165919|Galpha49B|chr2R|+	1	0.61	-0.39
NM_145335|mthl3|chr2R|-	0.67	0.28	-0.39
NM_139888|PGRP-SD|chr3L|+	0.74	0.35	-0.39
NM_143348|CG4849|chr3R|+	1	0.61	-0.39
NM_001272877|Tbc1d15-17|chr2L|+	1	0.61	-0.39
NM_057579|Dbp45A|chr2R|+	0.6	0.21	-0.39
NM_132014|CG4119|chrX|+	1	0.61	-0.39
NM_142350|m-cup|chr3R|-	0.79	0.4	-0.39
NM_001276214|Gprk2|chr3R|+	0.68	0.29	-0.39
NM_079050|RpL18A|chr2R|-	0.82	0.44	-0.38
NM_136989|CG13324|chr2R|-	0.83	0.45	-0.38
NM_168306|pix|chr3L|-	0.81	0.43	-0.38
NM_135858|CG15293|chr2L|-	0.97	0.59	-0.38
NM_001274120|CG4802|chr2R|+	0.51	0.13	-0.38
NM_135533|CG5384|chr2L|-	0.65	0.27	-0.38
NM_001043269|CG17271|chr3R|-	0.59	0.21	-0.38
NM_001103633|CG34310|chr2L|+	0.67	0.29	-0.38
NM_001103909|CG34198|chr2R|-	0.99	0.61	-0.38
NM_139691|CG10673|chr3L|-	0.97	0.59	-0.38
NM_176008|CG4658|chr2L|+	0.79	0.41	-0.38
NM_058103|Pfrx|chrX|+	0.95	0.57	-0.38
NR_073686|CR43767|chr2L|-	0.94	0.56	-0.38
NM_001274296|CG13902|chr3L|-	1	0.62	-0.38
NM_135761|DnaJ-H|chr2L|-	0.81	0.43	-0.38
NM_136435|fa2h|chr2R|-	0.93	0.55	-0.38
NM_139908|CG8042|chr3L|-	0.7	0.32	-0.38
NM_136550|CG8736|chr2R|-	1	0.62	-0.38
NM_142000|pic|chr3R|+	0.69	0.31	-0.38
NM_080247|Vhl|chr2R|+	0.98	0.6	-0.38
NM_001201735|Ucp4A|chrX|+	0.67	0.29	-0.38
NM_140581|IntS9|chr3L|-	1	0.62	-0.38
NM_080245|wds|chrX|+	0.7	0.32	-0.38
NM_001111009|su(f)|chrXHet|+	0.6	0.22	-0.38
NM_137269|CG7747|chr2R|-	0.69	0.31	-0.38
NM_166629|Upf3|chr2R|-	0.56	0.18	-0.38
NM_176345|CG33052|chr3L|-	0.61	0.23	-0.38
NM_078970|deltaTry|chr2R|+	0.85	0.48	-0.37
NM_141689|RpS29|chr3R|+	0.86	0.49	-0.37
NM_165824|CG30031|chr2R|+	0.68	0.31	-0.37
NM_137435|CG5084|chr2R|+	0.63	0.26	-0.37
NM_001104040|CG10625|chr3L|-	1	0.63	-0.37
NM_057874|Surf4|chr3R|-	0.61	0.24	-0.37
NM_001273660|Tep4|chr2L|+	0.89	0.52	-0.37
NM_001273392|CG5384|chr2L|-	0.63	0.26	-0.37
NM_140281|Pop2|chr3L|-	0.45	0.08	-0.37
NM_001104034|DOR|chr3L|+	0.85	0.48	-0.37
NM_142525|Cyp12a5|chr3R|+	1	0.63	-0.37
NM_168788|nes|chr3L|-	1	0.63	-0.37
NM_079266|Dhpr|chr3L|+	0.68	0.31	-0.37
NM_138219|CG13902|chr3L|-	1	0.63	-0.37
NM_165938|CG42708|chr2R|-	0.54	0.17	-0.37
NM_164503|daw|chr2L|+	0.56	0.19	-0.37
NM_142446|CG7142|chr3R|-	0.98	0.61	-0.37
NM_139397|CG18173|chr3L|-	0.67	0.3	-0.37
NM_140994|Pitslre|chr3L|+	0.69	0.32	-0.37
NM_142284|CG14881|chr3R|+	0.89	0.52	-0.37
NM_142691|Ubpy|chr3R|+	1	0.63	-0.37
NM_135151|CG9175|chr2L|-	0.68	0.31	-0.37
NM_140590|CG5027|chr3L|+	0.87	0.5	-0.37
NM_175942|CG33127|chr2L|+	0.91	0.55	-0.36
NM_001103901|l(2)03709|chr2R|+	0.95	0.59	-0.36
NM_167152|ND75|chrX|-	0.66	0.3	-0.36
NM_001202085|CG42846|chr3L|-	0.81	0.45	-0.36
NM_135632|CG16743|chr2L|+	1	0.64	-0.36
NM_169528|sqd|chr3R|-	1	0.64	-0.36
NM_167289|CG1572|chrX|-	0.76	0.4	-0.36
NM_001103634|CG34310|chr2L|+	0.61	0.25	-0.36
NM_001274045|LamC|chr2R|-	0.97	0.61	-0.36
NM_078809|me31B|chr2L|+	0.63	0.27	-0.36
NM_130678|CG14419|chrX|-	0.88	0.52	-0.36
NM_058028|CG4585|chr2R|-	0.96	0.6	-0.36
NM_080527|drm|chr2L|+	1	0.64	-0.36
NM_130656|Seipin|chrX|+	0.96	0.6	-0.36
NM_143679|MED26|chr4|-	1	0.64	-0.36
NM_143771|kermit|chr2R|-	0.84	0.48	-0.36
NM_139800|CG8549|chr3L|+	0.79	0.43	-0.36
NM_168859|CG5130|chr3L|-	1	0.64	-0.36
NM_134917|CG15406|chr2L|+	0.72	0.36	-0.36
NM_137822|CG13506|chr2R|+	0.92	0.56	-0.36
NM_206269|CG12006|chr3L|+	0.94	0.58	-0.36
NM_001275214|pzg|chr3L|+	0.75	0.39	-0.36
NM_079024|Cyp6a9|chr2R|-	0.43	0.07	-0.36
NM_001260302|CG31431|chr3R|+	0.86	0.5	-0.36
NM_001260303|CG31431|chr3R|+	0.86	0.5	-0.36
NM_140623|CG4933|chr3L|+	0.85	0.49	-0.36
NM_001103557|CG7378|chrX|+	0.63	0.27	-0.36
NM_141219|Fip1|chr3R|+	0.78	0.42	-0.36
NM_001274230|TM4SF|chr2R|+	0.59	0.23	-0.36
NM_001038944|Deaf1|chr3L|+	0.93	0.57	-0.36
NM_142099|CG3321|chr3R|+	0.9	0.55	-0.35
NM_133137|Muc18B|chrX|+	0.89	0.54	-0.35
NM_166594|Rpi|chr2R|+	1	0.65	-0.35
NM_132208|CG2254|chrX|-	0.63	0.28	-0.35
NM_057577|Sod2|chr2R|-	0.74	0.39	-0.35
NM_142030|CG9796|chr3R|-	0.95	0.6	-0.35
NM_166986|Rala|chrX|-	0.41	0.06	-0.35
NM_165412|CG3262|chr2L|+	0.93	0.58	-0.35
NM_137816|CG5819|chr2R|+	1	0.65	-0.35
NM_167942|CG1275|chr3L|-	0.6	0.25	-0.35
NM_058129|Sps2|chr2L|+	0.45	0.1	-0.35
NM_078858|Syx5|chr2L|+	0.74	0.39	-0.35
NM_166482|Tango11|chr2R|-	0.75	0.4	-0.35
NM_079907|ras|chrX|+	1	0.65	-0.35
NM_167652|Pfrx|chrX|+	0.93	0.58	-0.35
NM_001258821|Pfrx|chrX|+	0.93	0.58	-0.35
NM_079854|mRpS18C|chr3R|+	0.86	0.51	-0.35
NM_143572|Cpr100A|chr3R|+	0.71	0.36	-0.35
NM_001274942|Pex3|chr3L|+	0.83	0.48	-0.35
NM_137949|CG9812|chr2R|-	0.74	0.39	-0.35
NM_001201991|CG42808|chr2R|-	1	0.65	-0.35
NM_001273802|CG9410|chr2R|+	0.92	0.57	-0.35
NM_134543|l(1)G0004|chrX|+	1	0.65	-0.35
NM_001258905|CG43348|chr2L|+	0.49	0.14	-0.35
NM_164512|CG31950|chr2L|+	0.66	0.31	-0.35
NM_153771|CG8920|chr2R|+	0.69	0.34	-0.35
NM_143064|Smg6|chr3R|-	0.65	0.3	-0.35
NM_001275492|MBD-like|chr3R|+	0.74	0.39	-0.35
NM_169214|CG31464|chr3R|+	0.71	0.36	-0.35
NM_078569|RpII215|chrX|-	0.75	0.4	-0.35
NM_132503|CG11696|chrX|+	0.69	0.34	-0.35
NM_137849|RpS24|chr2R|-	0.97	0.63	-0.34
NM_176684|CG2930|chrX|+	0.88	0.54	-0.34
NM_058125|Rpt1|chr2R|-	0.82	0.48	-0.34
NM_132440|CG2145|chrX|+	0.6	0.26	-0.34
NM_132577|CG2556|chrX|+	0.89	0.55	-0.34
NM_137910|CG9877|chr2R|-	0.59	0.25	-0.34
NM_141581|CG9837|chr3R|-	0.96	0.62	-0.34
NM_136008|CG6870|chr2L|-	0.72	0.38	-0.34
NM_001144361|CLIP-190|chr2L|+	0.61	0.27	-0.34
NM_141648|CG8199|chr3R|+	0.92	0.58	-0.34
NM_001258482|Crk|chr4|+	0.61	0.27	-0.34
NM_153772|MED8|chr2R|-	1	0.66	-0.34
NM_001272498|ras|chrX|+	0.99	0.65	-0.34
NM_167656|Pfrx|chrX|+	0.92	0.58	-0.34
NM_169756|CREG|chr3R|-	0.5	0.16	-0.34
NM_001260206|bor|chr3R|-	0.71	0.37	-0.34
NM_001272623|Flo-2|chrX|+	0.64	0.3	-0.34
NM_141346|CG2017|chr3R|-	0.66	0.32	-0.34
NM_143493|Cog7|chr3R|-	1	0.66	-0.34
NM_166456|MESK2|chr2R|+	0.59	0.25	-0.34
NM_206287|smid|chr3L|+	0.5	0.16	-0.34
NM_137201|CG8187|chr2R|-	0.66	0.32	-0.34
NM_001274595|ltl|chr3L|+	1	0.66	-0.34
NM_143412|CG11877|chr3R|+	0.47	0.13	-0.34
NM_001274328|CG12084|chr3L|-	0.78	0.44	-0.34
NM_135305|CG7149|chr2L|-	0.88	0.54	-0.34
NM_080042|RpL37A|chr2L|+	0.8	0.47	-0.33
NM_058037|Int6|chr3L|-	1	0.67	-0.33
NM_079398|TpnC73F|chr3L|+	0.65	0.32	-0.33
NM_169810|Vha100-2|chr3R|-	0.78	0.45	-0.33
NM_140871|CG9231|chr3L|-	0.6	0.27	-0.33
NM_079207|Srp54k|chr3L|+	0.77	0.44	-0.33
NM_078914|Tsp42El|chr2R|+	0.4	0.07	-0.33
NM_001276067|Lerp|chr3R|-	0.78	0.45	-0.33
NM_079582|mRpL37|chr3R|-	0.6	0.27	-0.33
NM_057910|Idgf1|chr2L|+	0.64	0.31	-0.33
NM_170296|CG6330|chr3R|-	0.62	0.29	-0.33
NM_001042858|CG13865|chrX|+	0.8	0.47	-0.33
NM_079020|Dro|chr2R|+	0.46	0.13	-0.33
NM_136348|Pngl|chr2R|+	0.63	0.3	-0.33
NM_135403|Trs23|chr2L|+	0.79	0.46	-0.33
NM_143123|CG10550|chr3R|-	0.53	0.2	-0.33
NM_057433|usp|chrX|-	0.86	0.53	-0.33
NM_141551|CG8021|chr3R|+	0.58	0.25	-0.33
NM_057277|Mal-A2|chr2R|+	0.51	0.18	-0.33
NM_001272660|shi|chrX|+	0.85	0.52	-0.33
NM_141958|CG18616|chr3R|+	0.71	0.38	-0.33
NM_169802|l(3)05822|chr3R|-	0.84	0.51	-0.33
NM_167323|Rab40|chrX|-	0.55	0.22	-0.33
NM_057282|RpLP1|chr2L|+	0.83	0.51	-0.32
NM_169965|CG31233|chr3R|+	0.95	0.63	-0.32
NM_057307|ng1|chrX|+	0.59	0.27	-0.32
NM_079112|Adk2|chr2R|+	0.61	0.29	-0.32
NM_167081|l(1)G0255|chrX|+	0.58	0.26	-0.32
NM_143581|l(3)03670|chr3R|-	0.92	0.6	-0.32
NM_168120|CG10625|chr3L|-	1	0.68	-0.32
NM_080227|PebIII|chr2R|+	0.71	0.39	-0.32
NM_079017|Hsc70-5|chr2R|-	0.97	0.65	-0.32
NM_001144366|CG42305|chr2L|+	0.43	0.11	-0.32
NM_140794|Chmp1|chr3L|-	0.92	0.6	-0.32
NM_143538|aralar1|chr3R|-	1	0.68	-0.32
NM_139906|Srp9|chr3L|+	0.61	0.29	-0.32
NM_001272270|CG3603|chrX|+	0.77	0.45	-0.32
NM_141760|Art1|chr3R|-	0.94	0.62	-0.32
NM_135721|CG5446|chr2L|-	0.52	0.2	-0.32
NM_135534|CG4972|chr2L|+	0.62	0.3	-0.32
NM_167943|obst-I|chr3L|+	0.89	0.57	-0.32
NM_058023|Irp-1A|chr3R|-	0.95	0.63	-0.32
NM_137562|CG18607|chr2R|+	0.83	0.51	-0.32
NM_137477|Idgf5|chr2R|+	0.73	0.41	-0.32
NM_165581|ACC|chr2R|-	0.68	0.36	-0.32
NM_079376|mRpS31|chr3L|+	0.87	0.55	-0.32
NM_001042979|p120ctn|chr2R|+	0.82	0.5	-0.32
NM_001144650|Doa|chr3R|+	1	0.68	-0.32
NM_001144294|lectin-22C|chr2L|-	0.94	0.62	-0.32
NM_142325|CG3534|chr3R|+	0.61	0.29	-0.32
NM_140876|Lon|chr3L|-	0.79	0.47	-0.32
NM_079873|faf|chr3R|+	0.62	0.3	-0.32
NM_142809|CG6937|chr3R|+	0.62	0.3	-0.32
NM_001272695|CG9784|chrX|-	0.96	0.64	-0.32
NM_170287|Tl|chr3R|+	1	0.68	-0.32
NM_132047|CG16721|chrX|+	0.75	0.43	-0.32
NM_001103493|Sec16|chrX|+	0.69	0.37	-0.32
NM_001272559|Sec16|chrX|+	0.69	0.37	-0.32
NM_132584|Sec16|chrX|+	0.69	0.37	-0.32
NM_143222|CG14237|chr3R|+	0.62	0.3	-0.32
NM_165663|ltd|chr2R|-	0.7	0.38	-0.32
NM_141325|CG2091|chr3R|-	0.88	0.56	-0.32
NM_057814|lic|chrX|+	0.71	0.39	-0.32
NM_080370|ltd|chr2R|-	0.7	0.38	-0.32
NR_073726|CR31912|chr2L|+	0.85	0.53	-0.32
NM_001273184|Gpdh|chr2L|+	0.83	0.51	-0.32
NM_001169297|shi|chrX|+	0.85	0.53	-0.32
NM_140674|Lmpt|chr3L|+	0.55	0.23	-0.32
NM_137825|Mes4|chr2R|+	0.64	0.32	-0.32
NM_141592|CAHbeta|chr3R|+	0.93	0.61	-0.32
NM_142605|CG4936|chr3R|+	0.71	0.39	-0.32
NM_136988|CG13323|chr2R|-	1	0.69	-0.31
NM_001274572|RpL18|chr3L|-	0.72	0.41	-0.31
NM_165823|gammaTry|chr2R|+	0.79	0.48	-0.31
NM_131995|CG15784|chrX|+	0.99	0.68	-0.31
NM_001258906|CG43349|chr2L|+	0.51	0.2	-0.31
NM_138139|Tina-1|chr2R|-	0.6	0.29	-0.31
NM_057327|CG9757|chr3R|-	0.96	0.65	-0.31
NM_141624|CG16749|chr3R|-	0.51	0.2	-0.31
NR_073641|CR43836|chrX|-	0.62	0.31	-0.31
NM_176714|CG10962|chrX|-	0.61	0.3	-0.31
NM_001202130|akirin|chr3L|+	1	0.69	-0.31
NM_143199|Dak1|chr3R|-	0.98	0.67	-0.31
NM_001169213|Inx2|chrX|+	1	0.69	-0.31
NM_166658|CG3209|chr2R|+	0.6	0.29	-0.31
NM_141915|CG17738|chr3R|+	0.45	0.14	-0.31
NM_079145|Mtch|chr3L|+	0.72	0.41	-0.31
NM_001259596|Mtch|chr3L|+	0.67	0.36	-0.31
NM_132249|CG1440|chrX|+	0.43	0.12	-0.31
NM_141983|grsm|chr3R|-	0.69	0.38	-0.31
NM_136726|CAP|chr2R|+	1	0.69	-0.31
NM_135945|CG5861|chr2L|-	0.64	0.33	-0.31
NM_169221|stck|chr3R|+	0.76	0.45	-0.31
NM_169220|stck|chr3R|+	0.76	0.45	-0.31
NM_001273484|CG5446|chr2L|-	0.51	0.2	-0.31
NM_001274667|SrpRbeta|chr3L|-	0.54	0.23	-0.31
NM_142967|CG5510|chr3R|-	0.88	0.57	-0.31
NM_079135|emp|chr2R|-	0.88	0.57	-0.31
NM_134573|Npc1b|chrX|+	0.91	0.6	-0.31
NM_079146|mRpL17|chr3L|+	0.71	0.4	-0.31
NM_135850|Cyp28a5|chr2L|+	0.53	0.22	-0.31
NM_079752|mRpS24|chr3R|-	0.76	0.45	-0.31
NM_132938|CG4789|chrX|+	0.58	0.27	-0.31
NM_001274028|CG6191|chr2R|-	0.8	0.49	-0.31
NM_001144634|CG5746|chr3R|-	0.98	0.67	-0.31
NM_165949|Dgkepsilon|chr2R|+	1	0.69	-0.31
NM_133147|CG8028|chrX|-	1	0.69	-0.31
NM_133150|out|chrX|-	0.46	0.15	-0.31
NM_142496|CG7720|chr3R|-	0.79	0.48	-0.31
NM_001015122|rl|chr2RHet|+	0.61	0.3	-0.31
NM_001275720|CG18622|chr3R|-	0.98	0.67	-0.31
NM_001104173|fz2|chr3L|-	0.98	0.67	-0.31
NR_074017|CR44133|chr3R|+	0.49	0.18	-0.31
NM_143792|qsm|chr2R|-	0.51	0.2	-0.31
NM_001202236|CG14646|chr3R|+	0.91	0.6	-0.31
NM_001169473|CG6700|chr2L|-	0.43	0.12	-0.31
NM_001274631|CG13676|chr3L|-	0.77	0.46	-0.31
NM_001276041|LpR2|chr3R|-	0.67	0.36	-0.31
NM_170453|Acph-1|chr3R|-	0.62	0.31	-0.31
NM_136074|CG10428|chr2L|+	1	0.69	-0.31
NM_001169683|Inr-a|chr2R|-	0.64	0.33	-0.31
NM_169193|Sp7|chr3R|+	0.66	0.35	-0.31
NM_143636|CG2135|chr3R|-	0.48	0.17	-0.31
NM_001169353|Eph|chr4|+	0.52	0.21	-0.31
NM_176242|grau|chr2R|-	0.96	0.65	-0.31
NM_137791|CG2921|chr2R|-	0.89	0.58	-0.31
NM_135140|CG12393|chr2L|+	0.68	0.37	-0.31
NM_001032044|CG33635|chr2L|-	0.65	0.34	-0.31
NM_001272532|Tango10|chrX|+	0.89	0.58	-0.31
NM_001170186|CG4662|chr3R|+	0.65	0.34	-0.31
NM_137764|LBR|chr2R|+	0.71	0.4	-0.31
NM_001273705|CG2614|chr2L|+	0.61	0.3	-0.31
NM_057780|Nap1|chr2R|-	0.4	0.1	-0.3
NM_140511|CG7272|chr3L|+	0.42	0.12	-0.3
NM_001274239|Mov34|chr2R|+	0.88	0.58	-0.3
NM_001144417|CG10625|chr3L|-	0.65	0.35	-0.3
NM_167539|TwdlX|chrX|+	0.49	0.19	-0.3
NM_001272903|cbt|chr2L|-	1	0.7	-0.3
NM_135563|CG5322|chr2L|-	1	0.7	-0.3
NM_136880|CG8888|chr2R|-	0.9	0.6	-0.3
NM_176698|Inx7|chrX|-	0.81	0.51	-0.3
NM_175954|CG33123|chr2L|-	1	0.7	-0.3
NM_165595|CG30373|chr2R|-	0.61	0.31	-0.3
NM_141646|RnpS1|chr3R|+	1	0.7	-0.3
NM_132452|Vago|chrX|+	0.6	0.3	-0.3
NM_166244|CG30109|chr2R|+	0.45	0.15	-0.3
NM_001274422|prominin-like|chr3L|-	0.99	0.69	-0.3
NM_142683|CG7044|chr3R|-	1	0.7	-0.3
NM_001201829|jp|chr2L|-	0.97	0.67	-0.3
NM_001273772|CG17883|chr2R|+	0.72	0.42	-0.3
NM_142705|CG5919|chr3R|+	0.63	0.33	-0.3
NM_001043009|l(2)01289|chr2R|-	1	0.7	-0.3
NM_079533|alpha-Est10|chr3R|-	0.65	0.35	-0.3
NM_141744|Rrp46|chr3R|+	1	0.7	-0.3
NM_001273085|ed|chr2L|+	0.98	0.68	-0.3
NM_143073|veli|chr3R|-	0.51	0.21	-0.3
NM_169693|Hel89B|chr3R|+	0.9	0.6	-0.3
NM_206133|CG33459|chr2R|+	0.69	0.39	-0.3
NM_057673|Mef2|chr2R|-	0.78	0.48	-0.3
NM_001042800|CG32699|chrX|-	0.77	0.47	-0.3
NM_143099|CG10420|chr3R|-	0.88	0.58	-0.3
NM_079581|TfIIFbeta|chr3R|-	0.65	0.35	-0.3
NM_138111|CG4806|chr2R|-	0.84	0.54	-0.3
NM_001043288|CG13624|chr3R|-	0.92	0.62	-0.3
NM_057500|CycC|chr3R|-	0.57	0.27	-0.3
NM_001274071|Khc-73|chr2R|-	0.43	0.13	-0.3
NM_001103484|CG34348|chrX|+	0.78	0.48	-0.3
NM_169267|CG8121|chr3R|+	0.56	0.26	-0.3
NM_136090|Ttc19|chr2L|-	0.69	0.39	-0.3
NM_132515|Tango10|chrX|+	0.88	0.58	-0.3
NM_170194|CG31109|chr3R|-	0.62	0.32	-0.3
NM_176359|pip|chr3L|-	0.53	0.23	-0.3
NM_165579|nito|chr2R|+	0.8	0.5	-0.3
NM_170451|Jon99Ciii|chr3R|+	1	0.71	-0.29
NM_139583|CG10863|chr3L|-	0.42	0.13	-0.29
NM_139892|CG12262|chr3L|+	0.82	0.53	-0.29
NM_142964|CG6178|chr3R|+	0.92	0.63	-0.29
NM_135272|CG15818|chr2L|+	0.34	0.05	-0.29
NM_080353|Pros28.1|chrX|+	0.65	0.36	-0.29
NM_143728|CG14630|chrX|+	0.96	0.67	-0.29
NM_080031|Ag5r|chrX|-	0.6	0.31	-0.29
NM_132290|CG7267|chrX|-	0.7	0.41	-0.29
NM_136652|CG1809|chr2R|+	0.68	0.39	-0.29
NM_079244|Arp3|chr3L|-	1	0.71	-0.29
NM_144417|CG18815|chr3L|+	0.5	0.21	-0.29
NM_142415|DNaseII|chr3R|+	0.84	0.55	-0.29
NM_167351|CG32640|chrX|+	0.61	0.32	-0.29
NM_168501|CG10638|chr3L|-	0.54	0.25	-0.29
NM_001275018|TMS1|chr3L|+	0.46	0.17	-0.29
NM_137847|bonsai|chr2R|+	0.93	0.64	-0.29
NM_058154|G-ialpha65A|chr3L|-	1	0.71	-0.29
NM_080381|Nop60B|chr2R|+	0.7	0.41	-0.29
NM_136811|Cpr47Eb|chr2R|+	0.87	0.58	-0.29
NM_141942|CG5844|chr3R|+	0.61	0.32	-0.29
NM_135214|Tango1|chr2L|+	1	0.71	-0.29
NM_166417|CG30291|chr2R|-	0.69	0.4	-0.29
NM_143339|CG4980|chr3R|-	0.97	0.68	-0.29
NM_001201982|CG8520|chr2R|+	0.49	0.2	-0.29
NM_001201916|Lectin-galC1|chr2L|+	0.67	0.38	-0.29
NM_001144657|sima|chr3R|+	0.47	0.18	-0.29
NM_132889|CG9917|chrX|-	0.9	0.61	-0.29
NM_165814|CG9062|chr2R|-	1	0.71	-0.29
NM_079460|Psn|chr3L|+	0.57	0.28	-0.29
NM_001042983|CG17883|chr2R|+	0.71	0.42	-0.29
NM_134606|CG1486|chrX|+	0.6	0.31	-0.29
NR_073892|CR43786|chr2R|-	1	0.71	-0.29
NM_001259904|Max|chr3L|-	0.77	0.48	-0.29
NM_167141|sws|chrX|-	0.98	0.69	-0.29
NM_143519|CG1983|chr3R|-	0.8	0.51	-0.29
NM_206116|CG7639|chr2R|-	0.87	0.58	-0.29
NM_141178|CG12581|chr3R|+	0.77	0.48	-0.29
NM_166390|CG8929|chr2R|+	0.84	0.55	-0.29
NM_168170|CG18769|chr3L|+	0.82	0.53	-0.29
NM_136915|CG13163|chr2R|+	0.95	0.66	-0.29
NM_001259779|A2bp1|chr3L|+	0.87	0.58	-0.29
NM_001272409|CG12112|chrX|-	0.56	0.27	-0.29
NM_001170082|CG8116|chr3R|+	0.6	0.31	-0.29
NM_165213|CLIP-190|chr2L|+	0.61	0.32	-0.29
NM_132586|CG2543|chrX|+	0.59	0.3	-0.29
NM_136300|RpL21|chr2L|-	0.67	0.39	-0.28
NM_080165|betaTry|chr2R|+	0.79	0.51	-0.28
NM_001273496|Vha68-2|chr2L|+	0.51	0.23	-0.28
NM_079044|Amy-d|chr2R|+	0.55	0.27	-0.28
NM_136894|CG8860|chr2R|-	1	0.72	-0.28
NM_001275972|CG5515|chr3R|-	0.92	0.64	-0.28
NM_078782|Tep2|chr2L|-	1	0.72	-0.28
NM_136000|CG6453|chr2L|-	0.6	0.32	-0.28
NM_167352|CG32641|chrX|+	0.7	0.42	-0.28
NM_001031982|CG33722|chr3R|+	1	0.72	-0.28
NM_136299|CG3262|chr2L|+	0.92	0.64	-0.28
NM_078636|exd|chrX|+	0.94	0.66	-0.28
NM_137178|mRpL41|chr2R|-	1	0.72	-0.28
NM_001259447|CG5550|chr2R|+	0.41	0.13	-0.28
NM_167427|opm|chrX|-	1	0.72	-0.28
NM_141693|CG8507|chr3R|+	0.35	0.07	-0.28
NM_001272687|Anxb11|chrX|-	0.66	0.38	-0.28
NM_164736|milt|chr2L|+	0.88	0.6	-0.28
NM_001043109|CG34140|chr3L|-	0.97	0.69	-0.28
NM_132766|opm|chrX|-	0.98	0.7	-0.28
NM_001104277|cu|chr3R|+	0.49	0.21	-0.28
NM_167997|CG32284|chr3L|+	0.91	0.63	-0.28
NM_001031907|Rpp20|chrX|+	1	0.72	-0.28
NM_143308|CG5402|chr3R|-	0.63	0.35	-0.28
NM_001169315|CG32495|chrX|+	0.65	0.37	-0.28
NM_078597|mRpL38|chrX|+	0.83	0.55	-0.28
NM_001104371|CG4562|chr3R|-	0.84	0.56	-0.28
NM_140800|MED11|chr3L|+	0.9	0.62	-0.28
NM_001260471|krz|chr3R|-	0.95	0.67	-0.28
NM_136425|CG11107|chr2R|+	0.59	0.31	-0.28
NM_001103438|CG33181|chrX|+	0.79	0.51	-0.28
NM_136583|CG8232|chr2R|+	0.78	0.5	-0.28
NM_001272694|CG9784|chrX|-	1	0.72	-0.28
NM_143378|CG1523|chr3R|-	1	0.72	-0.28
NM_057754|Sr-CI|chr2L|+	0.82	0.54	-0.28
NM_001275541|Ugt86Dh|chr3R|+	0.95	0.67	-0.28
NM_001104094|I-2|chr3L|-	0.63	0.35	-0.28
NM_169022|Cdep|chr3R|+	0.69	0.41	-0.28
NM_143626|CstF-50|chr3R|-	0.89	0.61	-0.28
NM_139525|CG14958|chr3L|+	0.74	0.46	-0.28
NM_001258932|bowl|chr2L|+	0.69	0.41	-0.28
NM_145873|CG18659|chr2R|-	0.79	0.51	-0.28
NM_135560|holn1|chr2L|+	0.9	0.62	-0.28
NM_057225|hk|chr2L|-	0.55	0.27	-0.28
NM_001258584|Mnt|chrX|+	0.77	0.49	-0.28
NM_001274121|qkr54B|chr2R|+	0.81	0.53	-0.28
NM_057519|Gprk2|chr3R|+	0.89	0.61	-0.28
NM_165469|Pld|chr2R|+	0.49	0.21	-0.28
NM_140288|l(3)j2D3|chr3L|+	0.43	0.15	-0.28
NM_165823|gammaTry|chr2R|-	0.8	0.53	-0.27
NM_165824|CG30031|chr2R|-	0.8	0.53	-0.27
NM_168313|Argk|chr3L|-	0.9	0.63	-0.27
NM_001275220|CG11309|chr3L|-	1	0.73	-0.27
NM_136640|CG8801|chr2R|-	0.93	0.66	-0.27
NM_170557|CycG|chr3R|-	0.86	0.59	-0.27
NM_079362|mex1|chr3L|-	0.91	0.64	-0.27
NM_130694|CG14265|chrX|-	0.71	0.44	-0.27
NM_001276128|Rpn2|chr3R|+	0.96	0.69	-0.27
NM_138036|CG3209|chr2R|+	0.51	0.24	-0.27
NM_001031945|Hsp67Bb|chr3L|+	1	0.73	-0.27
NM_079770|OstStt3|chr3R|-	0.77	0.5	-0.27
NM_001274073|CG12963|chr2R|+	0.71	0.44	-0.27
NM_001169876|CG15012|chr3L|-	0.67	0.4	-0.27
NM_001273915|Jra|chr2R|+	0.99	0.72	-0.27
NM_079619|poly|chr3R|-	0.67	0.4	-0.27
NM_134933|Snx1|chr2L|+	0.5	0.23	-0.27
NM_001273761|Tif-IA|chr2L|+	0.34	0.07	-0.27
NM_001103507|Pdcd4|chrX|-	0.48	0.21	-0.27
NM_001201964|CG8026|chr2R|-	0.68	0.41	-0.27
NM_058115|Taf10|chr2L|+	0.44	0.17	-0.27
NM_001169657|nemy|chr2R|-	0.75	0.48	-0.27
NM_137697|mRpL54|chr2R|+	0.42	0.15	-0.27
NM_165968|Spt-I|chr2R|+	0.53	0.26	-0.27
NM_134657|CG3436|chr2L|+	0.88	0.61	-0.27
NM_134986|Dim1|chr2L|+	0.52	0.25	-0.27
NM_139403|CG2021|chr3L|-	0.88	0.61	-0.27
NM_167650|mRpS14|chrX|-	0.61	0.34	-0.27
NM_001274840|tral|chr3L|+	0.66	0.39	-0.27
NM_001169780|Oatp58Dc|chr2R|-	0.57	0.3	-0.27
NM_078872|bsf|chr2L|-	0.92	0.65	-0.27
NM_001274700|CG3529|chr3L|+	0.67	0.4	-0.27
NM_001274003|sug|chr2R|+	0.92	0.65	-0.27
NM_140395|CG10116|chr3L|-	0.85	0.58	-0.27
NM_001259975|CG34112|chr3R|-	0.55	0.28	-0.27
NM_135345|CG8475|chr2L|-	0.62	0.35	-0.27
NM_166642|CG3065|chr2R|+	0.98	0.71	-0.27
NM_167570|l(1)G0222|chrX|-	1	0.73	-0.27
NM_001273193|stai|chr2L|+	0.58	0.31	-0.27
NM_132896|CG9981|chrX|-	0.61	0.34	-0.27
NM_143114|CG10514|chr3R|-	0.55	0.28	-0.27
NM_133086|CG6540|chrX|+	0.88	0.61	-0.27
NM_079794|Tl|chr3R|+	1	0.73	-0.27
NM_001260224|sll|chr3R|+	0.35	0.08	-0.27
NM_134533|CG9578|chrX|+	0.75	0.48	-0.27
NM_136323|CG10395|chr2R|+	0.46	0.19	-0.27
NM_143532|CG15536|chr3R|-	0.92	0.65	-0.27
NM_001170041|CG2100|chr3R|-	0.69	0.42	-0.27
NM_057671|Mef2|chr2R|-	0.72	0.45	-0.27
NM_176344|CG33051|chr3L|-	0.71	0.44	-0.27
NM_001042863|CG7337|chr2L|+	0.85	0.58	-0.27
NM_176244|dom|chr2R|+	0.89	0.62	-0.27
NM_140028|CG4911|chr3L|-	0.82	0.55	-0.27
NM_079046|EDTP|chr2R|-	0.43	0.16	-0.27
NM_001273535|l(2)35Cc|chr2L|+	0.83	0.56	-0.27
NM_166231|qkr54B|chr2R|+	0.82	0.55	-0.27
NM_001144470|sowah|chr3L|-	0.76	0.49	-0.27
NM_001274684|CG4911|chr3L|-	0.82	0.55	-0.27
NM_079620|yellow-e|chr3R|-	0.72	0.45	-0.27
NM_139756|Jon65Aiii|chr3L|+	0.65	0.39	-0.26
NM_001273760|RpL21|chr2L|-	0.62	0.36	-0.26
NM_142665|RpS30|chr3R|+	0.5	0.24	-0.26
NM_001032010|fabp|chr3R|-	0.34	0.08	-0.26
NM_143787|Idh|chr3L|-	0.99	0.73	-0.26
NM_078863|Mhc|chr2L|+	0.98	0.72	-0.26
NM_137700|CG10527|chr2R|-	0.93	0.67	-0.26
NM_001144690|CG3011|chrX|-	1	0.74	-0.26
NM_170556|CycG|chr3R|-	0.86	0.6	-0.26
NM_142266|CG5903|chr3R|-	0.85	0.59	-0.26
NM_142610|CG5023|chr3R|+	0.76	0.5	-0.26
NM_136832|CG12384|chr2R|-	0.39	0.13	-0.26
NM_140489|Aats-gly|chr3L|+	1	0.74	-0.26
NM_001274987|th|chr3L|-	0.86	0.6	-0.26
NM_080383|NitFhit|chr3L|+	1	0.74	-0.26
NM_141271|CG1161|chr3R|+	0.48	0.22	-0.26
NM_001169994|Indy|chr3L|-	0.71	0.45	-0.26
NM_176491|B52|chr3R|+	0.81	0.55	-0.26
NM_133129|Mec2|chrX|+	0.36	0.1	-0.26
NM_167463|CG8974|chrX|-	0.55	0.29	-0.26
NM_057932|Lcp65Aa|chr3L|+	0.87	0.61	-0.26
NM_001275019|TMS1|chr3L|+	0.42	0.16	-0.26
NM_130501|CG5273|chrX|+	1	0.74	-0.26
NM_001272257|mRpL14|chrX|-	1	0.74	-0.26
NM_057269|LanA|chr3L|-	0.89	0.63	-0.26
NM_140496|Pex3|chr3L|+	1	0.74	-0.26
NM_166956|CG3588|chrX|+	0.85	0.59	-0.26
NM_141330|CG2051|chr3R|-	1	0.74	-0.26
NM_165796|CG7220|chr2R|+	0.54	0.28	-0.26
NM_001201849|CG17768|chr2L|-	0.65	0.39	-0.26
NM_169068|Rheb|chr3R|+	0.65	0.39	-0.26
NM_168204|lark|chr3L|+	0.8	0.54	-0.26
NM_001275028|CG32164|chr3L|+	0.82	0.56	-0.26
NM_132582|CG1824|chrX|-	0.43	0.17	-0.26
NM_001259193|CG43346|chr2L|-	0.95	0.69	-0.26
NM_132237|CG2147|chrX|+	0.98	0.72	-0.26
NM_167839|CG32483|chr3L|-	0.7	0.44	-0.26
NM_138269|cue|chr3L|-	0.87	0.61	-0.26
NM_079337|Gl|chr3L|+	1	0.74	-0.26
NM_079053|Rab4|chr2R|+	0.71	0.45	-0.26
NM_167421|Flo-2|chrX|+	0.36	0.1	-0.26
NM_079174|rasp|chr3L|+	1	0.74	-0.26
NM_001274821|thoc6|chr3L|-	1	0.74	-0.26
NM_001202155|CG42671|chr3L|+	0.39	0.13	-0.26
NM_142170|Spn88Eb|chr3R|-	0.7	0.44	-0.26
NM_078749|mRpS2|chr2L|-	0.81	0.55	-0.26
NM_001272676|CG9917|chrX|-	0.75	0.49	-0.26
NM_167491|eas|chrX|+	0.73	0.47	-0.26
NM_135341|CG8552|chr2L|-	0.74	0.48	-0.26
NM_168449|Alg10|chr3L|+	0.94	0.68	-0.26
NM_169816|fru|chr3R|-	0.96	0.7	-0.26
NM_140289|ssp|chr3L|+	0.57	0.31	-0.26
NM_001272645|CG6340|chrX|+	0.9	0.64	-0.26
NM_057981|ebi|chr2L|+	0.87	0.61	-0.26
NM_079990|Sara|chr2R|+	0.51	0.25	-0.26
NM_134801|CG4259|chr2L|-	0.86	0.6	-0.26
NM_168298|Tsp66E|chr3L|+	0.59	0.33	-0.26
NM_057604|Map60|chr2R|+	0.86	0.6	-0.26
NM_001202340|sav|chr3R|-	0.61	0.35	-0.26
NM_134786|CG7337|chr2L|+	0.89	0.63	-0.26
NM_001260384|CG6073|chr3R|-	0.91	0.65	-0.26
NM_206068|CG12128|chr2R|+	0.79	0.53	-0.26
NM_167521|hang|chrX|+	0.41	0.15	-0.26
NM_001042862|CG7337|chr2L|+	0.84	0.58	-0.26
NM_078844|l(2)35Bd|chr2L|+	0.42	0.16	-0.26
NM_001259804|app|chr3L|-	0.91	0.65	-0.26
NM_139755|Jon65Aiv|chr3L|+	0.67	0.42	-0.25
NM_079987|RpL8|chr3L|+	1	0.75	-0.25
NM_079570|Fst|chr3R|-	0.73	0.48	-0.25
NM_057686|tsr|chr2R|-	0.3	0.05	-0.25
NM_079220|yip7|chr3L|+	0.61	0.36	-0.25
NM_143778|l(2)06225|chr2L|-	0.88	0.63	-0.25
NM_057947|Thor|chr2L|+	0.72	0.47	-0.25
NM_078754|Trip1|chr2L|-	0.82	0.57	-0.25
NM_165158|Idgf3|chr2L|+	0.95	0.7	-0.25
NM_140977|CG6020|chr3L|+	0.57	0.32	-0.25
NM_079831|Jon99Ci|chr3R|-	0.7	0.45	-0.25
NM_170386|CG11876|chr3R|+	0.38	0.13	-0.25
NM_058097|Manf|chr3R|+	0.44	0.19	-0.25
NM_001103606|CG34176|chr2L|+	0.86	0.61	-0.25
NM_140001|CG13311|chr3L|-	0.99	0.74	-0.25
NM_142016|CG8773|chr3R|+	0.74	0.49	-0.25
NM_140912|Tom20|chr3L|+	0.74	0.49	-0.25
NM_079692|Elongin-B|chr3R|-	0.69	0.44	-0.25
NM_001276159|CG15515|chr3R|+	0.56	0.31	-0.25
NM_140194|Plod|chr3L|-	0.84	0.59	-0.25
NM_080192|Catsup|chr2L|+	0.72	0.47	-0.25
NM_139632|CG1319|chr3L|+	0.81	0.56	-0.25
NM_058066|UbcD10|chr2R|-	0.87	0.62	-0.25
NM_001259302|Etf-QO|chr2R|+	0.8	0.55	-0.25
NM_144328|CG10570|chr2L|-	0.64	0.39	-0.25
NM_135999|CG5110|chr2L|+	0.93	0.68	-0.25
NM_079025|Cyp6a8|chr2R|-	0.66	0.41	-0.25
NM_166328|CG15111|chr2R|+	0.99	0.74	-0.25
NM_001275952|RanBP3|chr3R|-	0.96	0.71	-0.25
NM_141417|CG1315|chr3R|-	0.88	0.63	-0.25
NM_143413|CG11880|chr3R|+	1	0.75	-0.25
NM_142274|CG6901|chr3R|+	1	0.75	-0.25
NM_001202286|poly|chr3R|-	0.53	0.28	-0.25
NM_135946|CG4278|chr2L|+	1	0.75	-0.25
NM_079308|viaf|chr3L|-	0.84	0.59	-0.25
NM_139928|MED24|chr3L|+	1	0.75	-0.25
NM_169762|CG5840|chr3R|+	0.28	0.03	-0.25
NM_142123|CG3505|chr3R|+	0.95	0.7	-0.25
NM_058070|Taf10b|chr2L|-	0.85	0.6	-0.25
NM_135724|Oatp33Ea|chr2L|-	0.69	0.44	-0.25
NM_132451|CG15203|chrX|+	0.47	0.22	-0.25
NM_001104476|woc|chr3R|-	0.98	0.73	-0.25
NM_058100|Stam|chr2L|+	0.77	0.52	-0.25
NM_001259202|CG3635|chr2L|+	0.43	0.18	-0.25
NM_141095|Rpb8|chr3L|+	0.73	0.48	-0.25
NM_143039|CG7006|chr3R|+	0.73	0.48	-0.25
NM_001169811|Dcp1|chr2R|-	0.92	0.67	-0.25
NM_001169907|CG42445|chr3L|-	1	0.75	-0.25
NM_139439|CG15820|chr3L|-	0.91	0.66	-0.25
NM_165625|stmA|chr2R|-	0.53	0.28	-0.25
NM_134988|CG15432|chr2L|+	0.85	0.6	-0.25
NM_001273650|RanGap|chr2L|+	0.66	0.41	-0.25
NM_143639|CG2118|chr3R|-	0.52	0.27	-0.25
NM_001273502|DnaJ-H|chr2L|-	0.68	0.43	-0.25
NM_079761|Syx18|chr3R|-	0.54	0.29	-0.25
NM_132970|CG5070|chrX|+	0.69	0.44	-0.25
NM_139532|CG14967|chr3L|-	0.88	0.63	-0.25
NM_131942|CG3527|chrX|+	0.83	0.58	-0.25
NM_079137|uzip|chr2R|+	0.52	0.27	-0.25
NM_001259450|CG6805|chr2R|+	0.53	0.28	-0.25
NM_143511|CG7946|chr3R|+	0.46	0.21	-0.25
NM_132483|CG1737|chrX|+	1	0.75	-0.25
NM_079019|RpI1|chr2R|-	0.71	0.46	-0.25
NM_001169807|Pde8|chr2R|+	0.8	0.55	-0.25
NM_166809|ATPsyn-beta|chr4|+	1	0.76	-0.24
NM_166890|sta|chrX|-	0.95	0.71	-0.24
NM_001110960|RpL15|chr3LHet|+	0.98	0.74	-0.24
NM_057283|RpL19|chr2R|-	0.48	0.24	-0.24
NM_001272152|ATPsyn-beta|chr4|+	0.89	0.65	-0.24
NM_132689|CG11151|chrX|+	0.53	0.29	-0.24
NM_166293|Pepck|chr2R|+	1	0.76	-0.24
NM_080188|Hsp70Bb|chr3R|+	0.87	0.63	-0.24
NM_079519|Rm62|chr3R|-	0.98	0.74	-0.24
NM_001202253|Rm62|chr3R|-	0.98	0.74	-0.24
NM_142502|CG14292|chr3R|-	0.92	0.68	-0.24
NM_140482|CG18649|chr3L|-	0.5	0.26	-0.24
NM_001144364|CG17325|chr2L|+	1	0.76	-0.24
NM_142517|NP15.6|chr3R|+	0.8	0.56	-0.24
NM_131943|CG11444|chrX|-	1	0.76	-0.24
NM_164820|Akap200|chr2L|+	1	0.76	-0.24
NM_135205|Ent2|chr2L|+	1	0.76	-0.24
NM_001170131|Hrb87F|chr3R|-	0.67	0.43	-0.24
NM_168949|Csp|chr3L|+	0.97	0.73	-0.24
NM_132923|CG9672|chrX|-	0.63	0.39	-0.24
NM_136003|CG6412|chr2L|-	0.96	0.72	-0.24
NM_001273350|CG9586|chr2L|-	0.48	0.24	-0.24
NM_137015|CG10799|chr2R|+	0.68	0.44	-0.24
NM_142921|RanBP3|chr3R|-	0.96	0.72	-0.24
NM_080176|GstD6|chr3R|+	0.95	0.71	-0.24
NM_164983|Qtzl|chr2L|+	0.49	0.25	-0.24
NM_001031920|Kaz1-ORFB|chr3L|+	0.39	0.15	-0.24
NM_001144319|Tfb5|chr2L|-	0.48	0.24	-0.24
NM_001274594|CG7546|chr3L|+	0.98	0.74	-0.24
NM_001274593|CG7546|chr3L|+	0.98	0.74	-0.24
NM_058064|nop5|chr2L|-	0.46	0.22	-0.24
NM_136554|Vps25|chr2R|+	0.81	0.57	-0.24
NM_167435|Top1|chrX|+	0.75	0.51	-0.24
NM_141475|pyd3|chr3R|-	0.37	0.13	-0.24
NM_137754|pirk|chr2R|-	0.87	0.63	-0.24
NM_167124|CG1677|chrX|-	0.87	0.63	-0.24
NM_001275332|tacc|chr3R|-	0.45	0.21	-0.24
NM_001259682|CG14989|chr3L|+	0.59	0.35	-0.24
NM_137222|CG8299|chr2R|-	0.9	0.66	-0.24
NM_132013|Sirt4|chrX|-	0.94	0.7	-0.24
NM_135825|TM9SF4|chr2L|+	0.65	0.41	-0.24
NM_140055|Bet3|chr3L|-	0.47	0.23	-0.24
NM_140068|pall|chr3L|-	1	0.76	-0.24
NM_057665|ine|chr2L|-	0.56	0.32	-0.24
NM_001272802|Alr|chrX|+	1	0.76	-0.24
NM_138029|MAN1|chr2R|+	1	0.76	-0.24
NM_001043001|CG14464|chr2R|+	0.45	0.21	-0.24
NM_165655|CG30344|chr2R|+	0.45	0.21	-0.24
NM_079016|Mdr50|chr2R|+	0.45	0.21	-0.24
NM_141772|CG6574|chr3R|-	0.75	0.51	-0.24
NM_140727|CG7589|chr3L|+	0.47	0.23	-0.24
NM_141048|CG7324|chr3L|-	0.85	0.61	-0.24
NM_001275070|cln3|chr3L|-	0.79	0.55	-0.24
NM_141584|CG8379|chr3R|+	0.66	0.42	-0.24
NM_058093|CHIP|chr2L|+	0.67	0.43	-0.24
NM_140688|CG7728|chr3L|+	0.95	0.71	-0.24
NM_141568|CG9797|chr3R|-	0.53	0.29	-0.24
NM_137583|hpo|chr2R|-	0.86	0.62	-0.24
NM_165058|CG31731|chr2L|+	0.72	0.48	-0.24
NM_134897|GABPI|chr2L|+	0.53	0.29	-0.24
NM_141761|CG14687|chr3R|+	0.83	0.59	-0.24
NM_167309|CG43154|chrX|+	0.64	0.4	-0.24
NM_001258583|Mnt|chrX|+	0.72	0.48	-0.24
NM_169932|CG31223|chr3R|+	0.82	0.58	-0.24
NM_136623|Rme-8|chr2R|-	0.53	0.29	-0.24
NM_136340|gp210|chr2R|+	0.49	0.25	-0.24
NM_139905|CG8111|chr3L|-	0.7	0.46	-0.24
NM_140188|wls|chr3L|-	0.75	0.51	-0.24
NM_165825|CG30025|chr2R|-	0.75	0.52	-0.23
NM_080366|Ef2b|chr2L|-	0.97	0.74	-0.23
NM_137529|CG15093|chr2R|-	1	0.77	-0.23
NM_001272964|Nplp4|chr2L|+	0.36	0.13	-0.23
NM_001169368|Gs1|chr2L|+	0.86	0.63	-0.23
NM_144456|GstD10|chr3R|-	0.86	0.63	-0.23
NM_001202181|mex1|chr3L|-	0.86	0.63	-0.23
NM_079472|AcCoAS|chr3L|-	0.81	0.58	-0.23
NM_135299|CG7203|chr2L|-	1	0.77	-0.23
NM_136384|CG3270|chr2R|+	1	0.77	-0.23
NM_001274938|Aats-gly|chr3L|+	1	0.77	-0.23
NM_164511|CG31694|chr2L|-	0.51	0.28	-0.23
NM_139642|CG15019|chr3L|-	0.43	0.2	-0.23
NM_140016|Srp68|chr3L|+	0.89	0.66	-0.23
NM_078813|mRpS7|chr2L|+	0.87	0.64	-0.23
NM_079874|ferrochelatase|chr3R|-	0.98	0.75	-0.23
NM_137316|CG5550|chr2R|+	0.35	0.12	-0.23
NM_057720|cni|chr2L|-	0.38	0.15	-0.23
NM_001169641|whd|chr2R|-	0.62	0.39	-0.23
NM_170120|CG5991|chr3R|+	0.97	0.74	-0.23
NM_141064|Est-Q|chr3L|+	0.96	0.73	-0.23
NM_080171|RpII18|chr3R|+	0.77	0.54	-0.23
NM_001275416|alpha-Est2|chr3R|+	0.84	0.61	-0.23
NM_170329|TfIIA-L|chr3R|+	0.54	0.31	-0.23
NM_130503|CG13360|chrX|-	0.38	0.15	-0.23
NM_137462|CG5721|chr2R|-	0.81	0.58	-0.23
NM_141401|Neurochondrin|chr3R|+	0.91	0.68	-0.23
NM_170344|Mtl|chr3R|+	1	0.77	-0.23
NM_165804|CG30016|chr2R|-	0.55	0.32	-0.23
NM_001169675|CG6145|chr2R|-	0.76	0.53	-0.23
NM_142648|Cpr92F|chr3R|+	1	0.77	-0.23
NM_001169400|ine|chr2L|-	0.63	0.4	-0.23
NM_137998|Dcp1|chr2R|-	0.91	0.68	-0.23
NM_140132|scramb1|chr3L|-	0.52	0.29	-0.23
NM_001273038|daw|chr2L|+	0.31	0.08	-0.23
NM_134509|Alr|chrX|+	1	0.77	-0.23
NM_170492|PH4alphaEFB|chr3R|+	0.5	0.27	-0.23
NM_133145|CG8010|chrX|-	0.75	0.52	-0.23
NM_132637|CG2453|chrX|-	0.34	0.11	-0.23
NM_134932|CG2772|chr2L|+	0.65	0.42	-0.23
NM_001104488|CG1646|chr3R|+	0.71	0.48	-0.23
NM_134916|CG9663|chr2L|-	0.98	0.75	-0.23
NM_143201|CG14543|chr3R|+	0.85	0.62	-0.23
NM_080325|lva|chrX|-	0.57	0.34	-0.23
NM_001110899|CG41378|chr2RHet|-	0.5	0.27	-0.23
NM_142459|Nup43|chr3R|+	0.88	0.65	-0.23
NM_141847|CG6834|chr3R|-	0.37	0.14	-0.23
NM_139703|membrin|chr3L|+	0.76	0.53	-0.23
NM_143500|CG15525|chr3R|-	0.64	0.41	-0.23
NM_001038977|Saf-B|chr3R|+	0.64	0.41	-0.23
NM_079573|alphaTub85E|chr3R|-	0.78	0.55	-0.23
NM_001104104|A2bp1|chr3L|+	0.67	0.44	-0.23
NM_079162|RpL23A|chr3L|-	0.68	0.46	-0.22
NM_057925|Lcp65Ag1|chr3L|-	0.43	0.21	-0.22
NM_167394|CG32603|chrX|+	1	0.78	-0.22
NM_001260387|CG43117|chr3R|+	0.57	0.35	-0.22
NM_141306|CG12171|chr3R|+	0.9	0.68	-0.22
NM_058112|Akap200|chr2L|+	1	0.78	-0.22
NM_058021|TER94|chr2R|+	0.75	0.53	-0.22
NM_142863|CG6726|chr3R|+	0.45	0.23	-0.22
NM_001273881|Acsl|chr2R|+	0.76	0.54	-0.22
NM_001273902|Uba1|chr2R|-	0.89	0.67	-0.22
NM_001259544|CG3499|chr2R|-	1	0.78	-0.22
NM_136509|CG18316|chr2R|+	1	0.78	-0.22
NM_168702|Nc73EF|chr3L|+	0.59	0.37	-0.22
NM_135556|CG5168|chr2L|+	0.82	0.6	-0.22
NM_001259517|Glycogenin|chr2R|+	0.62	0.4	-0.22
NM_001274250|CG9380|chr2R|-	0.72	0.5	-0.22
NM_001259223|l(2)01289|chr2R|-	1	0.78	-0.22
NM_137302|Picot|chr2R|-	0.63	0.41	-0.22
NM_079115|Dat|chr2R|+	0.76	0.54	-0.22
NM_169663|CG44014|chr3R|-	0.79	0.57	-0.22
NM_001275429|CG14463|chr3R|+	1	0.78	-0.22
NM_001169612|lig|chr2R|+	0.9	0.68	-0.22
NM_137656|maf-S|chr2R|+	0.75	0.53	-0.22
NM_001275395|CG1315|chr3R|-	0.87	0.65	-0.22
NM_130692|CG3939|chrX|+	0.61	0.39	-0.22
NM_166469|CG42365|chr2R|+	1	0.78	-0.22
NM_140839|Bet1|chr3L|+	0.56	0.34	-0.22
NM_166703|emp|chr2R|-	0.86	0.64	-0.22
NR_073624|CR44031|chr4|+	0.86	0.64	-0.22
NM_132542|Sclp|chrX|-	0.37	0.15	-0.22
NM_167448|CG6340|chrX|+	0.27	0.05	-0.22
NM_001274554|CG10103|chr3L|-	0.43	0.21	-0.22
NM_001273488|Oatp33Ea|chr2L|-	0.63	0.41	-0.22
NM_206748|Stim|chrX|-	0.34	0.12	-0.22
NM_132633|CG4332|chrX|+	1	0.78	-0.22
NM_141746|Cyp12e1|chr3R|+	0.85	0.63	-0.22
NM_167111|Sxl|chrX|-	0.81	0.59	-0.22
NM_141061|CG7519|chr3L|+	0.87	0.65	-0.22
NM_164339|CG9776|chr3R|-	0.93	0.71	-0.22
NM_168404|scramb1|chr3L|-	0.51	0.29	-0.22
NM_140003|CG13312|chr3L|-	0.86	0.64	-0.22
NM_142623|Sirt2|chr3R|+	0.83	0.61	-0.22
NM_134990|Elp3|chr2L|+	1	0.78	-0.22
NM_139690|CHMP2B|chr3L|+	0.79	0.57	-0.22
NM_001272624|Flo-2|chrX|+	0.49	0.27	-0.22
NM_001144371|CG31688|chr2L|+	1	0.78	-0.22
NM_176271|CG2469|chr3L|+	0.6	0.38	-0.22
NM_001274276|mthl10|chr3L|-	0.88	0.66	-0.22
NM_001014513|stmA|chr2R|-	0.52	0.3	-0.22
NM_136294|CG3635|chr2L|+	0.47	0.25	-0.22
NM_132676|tth|chrX|-	0.64	0.42	-0.22
NM_166434|MFS16|chr2R|+	0.48	0.26	-0.22
NM_001273379|CG31712|chr2L|-	0.55	0.33	-0.22
NM_079085|qkr58E-1|chr2R|-	0.4	0.18	-0.22
NM_142425|cdm|chr3R|-	0.31	0.09	-0.22
NM_135367|CG14275|chr2L|+	0.7	0.48	-0.22
NM_168040|CG32266|chr3L|+	0.55	0.33	-0.22
NM_001144235|abba|chr2R|+	0.83	0.61	-0.22
NM_001169606|CG1399|chr2R|-	0.56	0.34	-0.22
NM_135348|CG8451|chr2L|-	0.93	0.71	-0.22
NM_168542|CG10171|chr3L|-	0.59	0.37	-0.22
NM_135865|mTTF|chr2L|-	0.67	0.45	-0.22
NM_166605|CG30411|chr2R|+	0.42	0.2	-0.22
NM_136483|CG12822|chr2R|+	0.86	0.64	-0.22
NM_001275743|SF1|chr3R|+	0.41	0.19	-0.22
NM_135922|CG3793|chr2L|+	0.59	0.37	-0.22
NM_138012|thoc5|chr2R|+	0.48	0.26	-0.22
NM_165394|Ef2b|chr2L|-	0.97	0.76	-0.21
NM_001273288|Rack1|chr2L|-	0.84	0.63	-0.21
NM_137981|CG11300|chr2R|+	0.53	0.32	-0.21
NM_001202043|CG15093|chr2R|-	1	0.79	-0.21
NM_137485|GstE7|chr2R|+	1	0.79	-0.21
NM_001104360|CG34282|chr3R|+	0.61	0.4	-0.21
NM_001272934|CG43349|chr2L|+	0.31	0.1	-0.21
NM_166237|CG4847|chr2R|+	1	0.79	-0.21
NM_141434|CG1943|chr3R|+	0.9	0.69	-0.21
NM_136209|CG9318|chr2L|-	1	0.79	-0.21
NM_058006|Hop|chr2L|+	0.34	0.13	-0.21
NM_079047|robl|chr2R|+	0.39	0.18	-0.21
NM_164624|His3.3A|chr2L|+	0.57	0.36	-0.21
NM_137331|ste24a|chr2R|-	1	0.79	-0.21
NM_079473|ppl|chr3L|-	0.63	0.42	-0.21
NM_205966|vir-1|chr2L|-	0.52	0.31	-0.21
NM_137541|Jheh1|chr2R|-	0.7	0.49	-0.21
NM_167276|Dlic|chrX|+	1	0.79	-0.21
NM_135433|CG9586|chr2L|-	0.42	0.21	-0.21
NM_142951|CG5991|chr3R|+	1	0.79	-0.21
NM_137919|CG13545|chr2R|-	0.65	0.44	-0.21
NM_166952|CG32795|chrX|-	0.59	0.38	-0.21
NM_140420|CG9040|chr3L|+	0.85	0.64	-0.21
NM_001104400|CG34288|chr3R|-	0.74	0.53	-0.21
NM_001275363|CG31549|chr3R|+	0.93	0.72	-0.21
NM_141294|CG12746|chr3R|+	1	0.79	-0.21
NM_001202145|Galk|chr3L|-	0.75	0.54	-0.21
NM_142283|CG17565|chr3R|+	0.24	0.03	-0.21
NM_140518|AGO2|chr3L|+	0.83	0.62	-0.21
NM_131932|CG2982|chrX|+	1	0.79	-0.21
NM_141102|CG14572|chr3L|+	0.7	0.49	-0.21
NM_167949|CG42669|chr3L|+	1	0.79	-0.21
NM_168789|Bet1|chr3L|+	0.49	0.28	-0.21
NM_080207|PpD3|chr3R|+	0.44	0.23	-0.21
NM_134958|CG10031|chr2L|-	0.4	0.19	-0.21
NM_001273561|EndoGI|chr2L|+	0.52	0.31	-0.21
NM_135642|Ge-1|chr2L|-	1	0.79	-0.21
NM_001170086|CG9837|chr3R|-	0.9	0.69	-0.21
NM_130590|CG14812|chrX|-	0.75	0.54	-0.21
NM_167903|ABCB7|chr3L|+	0.49	0.28	-0.21
NM_132906|CG13014|chrX|+	1	0.79	-0.21
NM_167313|pot|chrX|-	1	0.79	-0.21
NM_001103806|CG34229|chr2R|+	0.35	0.14	-0.21
NM_001275858|Synd|chr3R|+	0.59	0.38	-0.21
NM_167788|Cda4|chrX|-	0.63	0.42	-0.21
NM_001144409|CG10359|chr3L|+	0.89	0.68	-0.21
NM_130666|CG2681|chrX|+	0.95	0.74	-0.21
NM_140771|CG5147|chr3L|-	1	0.79	-0.21
NM_079479|Hr78|chr3L|-	0.84	0.63	-0.21
NM_140765|CG16775|chr3L|-	0.76	0.55	-0.21
NM_168136|vito|chr3L|-	1	0.79	-0.21
NM_001144699|CG42308|chrX|+	0.85	0.64	-0.21
NM_136611|Mys45A|chr2R|-	0.96	0.75	-0.21
NM_134700|KH1|chr2L|+	1	0.79	-0.21
NM_001202303|GATAe|chr3R|+	0.76	0.55	-0.21
NM_001274485|Syx17|chr3L|+	0.9	0.69	-0.21
NM_164973|CG31704|chr2L|+	0.87	0.66	-0.21
NM_001273938|RanBPM|chr2R|+	0.73	0.52	-0.21
NM_001202176|CG6833|chr3L|+	1	0.79	-0.21
NM_137859|CG4250|chr2R|+	0.33	0.12	-0.21
NM_168289|CG32022|chr3L|-	0.83	0.62	-0.21
NM_141146|CG14456|chr3L|+	0.75	0.54	-0.21
NM_142436|CG7175|chr3R|-	0.57	0.36	-0.21
NM_132197|CG10778|chrX|-	0.61	0.4	-0.21
NR_048118|CR43429|chr2R|-	0.77	0.56	-0.21
NM_142220|CG6045|chr3R|-	0.73	0.52	-0.21
NM_167043|RpL35|chrX|+	0.69	0.49	-0.2
NM_057424|alphaTub84B|chr3R|+	0.86	0.66	-0.2
NM_176290|Lcp65Ae|chr3L|-	0.23	0.03	-0.2
NM_143454|Obp99c|chr3R|-	0.63	0.43	-0.2
NM_057908|Idgf3|chr2L|+	0.94	0.74	-0.2
NM_139727|CG10576|chr3L|-	0.71	0.51	-0.2
NM_078939|Pgi|chr2R|-	0.57	0.37	-0.2
NM_079057|Dp1|chr2R|+	0.42	0.22	-0.2
NM_001031915|CG33713|chrX|-	0.95	0.75	-0.2
NM_135530|CG5390|chr2L|-	0.86	0.66	-0.2
NM_135469|IP3K1|chr2L|+	0.82	0.62	-0.2
NM_136470|CG12107|chr2R|+	0.37	0.17	-0.2
NR_048398|CR43471|chr3R|-	0.99	0.79	-0.2
NM_132238|sni|chrX|-	0.95	0.75	-0.2
NM_001043225|CG34117|chr3R|-	0.38	0.18	-0.2
NM_169302|Unc-115b|chr3R|-	0.62	0.42	-0.2
NM_137093|CG30069|chr2R|+	0.49	0.29	-0.2
NM_057731|sw|chrX|-	0.54	0.34	-0.2
NM_001274186|Treh|chr2R|+	0.69	0.49	-0.2
NM_078610|Arp6|chrX|-	1	0.8	-0.2
NM_001169832|Vdup1|chr3L|-	0.26	0.06	-0.2
NM_142915|CG31148|chr3R|+	0.54	0.34	-0.2
NM_001201867|loqs|chr2L|+	0.99	0.79	-0.2
NM_144355|SC35|chr2L|-	0.68	0.48	-0.2
NM_135208|CG11050|chr2L|+	0.77	0.57	-0.2
NM_141522|CG11672|chr3R|-	0.81	0.61	-0.2
NM_143632|salt|chr3R|-	0.43	0.23	-0.2
NM_143717|eIF5B|chr3L|-	0.59	0.39	-0.2
NM_134725|CG4552|chr2L|+	1	0.8	-0.2
NM_001272219|mRpL16|chrX|+	0.48	0.28	-0.2
NM_080499|Zip3|chr3R|+	0.31	0.11	-0.2
NM_169012|CG9775|chr3R|-	0.55	0.35	-0.2
NM_001272868|CG13694|chr2L|-	0.99	0.79	-0.2
NM_001201953|Lpin|chr2R|-	0.88	0.68	-0.2
NM_001273301|CG8475|chr2L|-	0.38	0.18	-0.2
NM_001274664|CG5989|chr3L|-	0.64	0.44	-0.2
NM_167178|AP-1gamma|chrX|+	0.91	0.71	-0.2
NM_001272451|CG12118|chrX|-	0.86	0.66	-0.2
NM_001274557|CG10103|chr3L|-	0.44	0.24	-0.2
NM_142231|CG9590|chr3R|+	0.69	0.49	-0.2
NM_140170|blos2|chr3L|+	0.95	0.75	-0.2
NM_001258660|AP-1gamma|chrX|+	0.91	0.71	-0.2
NM_001258661|AP-1gamma|chrX|+	0.91	0.71	-0.2
NM_079937|sls|chr3L|-	1	0.8	-0.2
NM_166787|myo|chr4|-	0.54	0.34	-0.2
NM_001170076|CG2747|chr3R|-	1	0.8	-0.2
NM_001273098|CG15432|chr2L|+	0.76	0.56	-0.2
NR_073816|CR43809|chr2L|-	0.8	0.6	-0.2
NM_136747|trsn|chr2R|-	0.54	0.34	-0.2
NM_137344|CG30456|chr2R|+	0.59	0.39	-0.2
NM_001258985|CG11236|chr2L|+	0.53	0.33	-0.2
NM_132629|MFS10|chrX|+	0.97	0.77	-0.2
NM_143129|CHKov1|chr3R|-	0.72	0.52	-0.2
NM_001274468|CG14995|chr3L|-	0.68	0.48	-0.2
NM_176322|Est-6|chr3L|+	0.34	0.14	-0.2
NM_176731|CG33178|chrX|+	0.59	0.39	-0.2
NM_142188|CG6276|chr3R|-	0.77	0.57	-0.2
NM_001170197|Mvl|chr3R|-	0.5	0.3	-0.2
NM_168059|CG14995|chr3L|-	0.63	0.43	-0.2
NM_166318|abba|chr2R|+	0.79	0.59	-0.2
NM_165729|CG1407|chr2R|-	0.66	0.46	-0.2
NM_079895|Rfabg|chr4|+	0.86	0.67	-0.19
NM_001276037|RpL27|chr3R|-	0.52	0.33	-0.19
NM_057590|RpS13|chr2L|-	0.62	0.43	-0.19
NM_080145|RpS14a|chrX|+	0.45	0.26	-0.19
NM_140737|Jon74E|chr3L|-	0.79	0.6	-0.19
NM_165870|Cam|chr2R|+	0.6	0.41	-0.19
NM_057733|CG5210|chr2R|+	0.84	0.65	-0.19
NM_176588|Tpi|chr3R|-	0.83	0.64	-0.19
NM_139977|GstO3|chr3L|+	1	0.81	-0.19
NM_167207|Idgf4|chrX|-	0.75	0.56	-0.19
NM_143266|CG17191|chr3R|-	0.88	0.69	-0.19
NM_001169723|CG5174|chr2R|+	1	0.81	-0.19
NM_165577|CG2915|chr2R|-	1	0.81	-0.19
NM_001202268|skap|chr3R|+	0.47	0.28	-0.19
NM_135423|CG9568|chr2L|+	0.28	0.09	-0.19
NM_139521|CG14963|chr3L|-	0.74	0.55	-0.19
NM_134975|CG3702|chr2L|-	1	0.81	-0.19
NM_079391|Pros26|chr3L|-	0.78	0.59	-0.19
NM_135072|Cyp4ac1|chr2L|+	0.99	0.8	-0.19
NM_001169934|CG42455|chr3L|+	0.92	0.73	-0.19
NM_001170217|CG7048|chr3R|+	0.31	0.12	-0.19
NM_168076|Hexo1|chr3L|+	0.91	0.72	-0.19
NM_130576|CG3740|chrX|-	1	0.81	-0.19
NM_170121|CG5991|chr3R|+	1	0.81	-0.19
NM_001275889|CG6455|chr3R|-	0.47	0.28	-0.19
NM_001273380|CG5853|chr2L|-	0.28	0.09	-0.19
NM_058057|Inos|chr2R|-	0.5	0.31	-0.19
NM_137127|CG12868|chr2R|-	0.69	0.5	-0.19
NM_057288|mago|chr2R|+	0.36	0.17	-0.19
NM_080107|e(y)2|chrX|-	0.99	0.8	-0.19
NM_143464|IntS11|chr3R|+	1	0.81	-0.19
NM_140995|Pex16|chr3L|-	1	0.81	-0.19
NM_057730|sw|chrX|-	0.54	0.35	-0.19
NM_141844|CG14715|chr3R|+	0.44	0.25	-0.19
NM_140802|Aut1|chr3L|+	0.9	0.71	-0.19
NM_141270|CG11999|chr3R|-	0.75	0.56	-0.19
NM_001144295|CG42371|chr2L|-	0.8	0.61	-0.19
NM_141512|Gie|chr3R|+	0.36	0.17	-0.19
NM_143634|Smvt|chr3R|-	0.8	0.61	-0.19
NM_001170313|gammaCop|chr3R|+	0.68	0.49	-0.19
NM_079560|mRpL19|chr3R|+	0.93	0.74	-0.19
NM_079550|RpA-70|chr3R|-	0.63	0.44	-0.19
NM_001273244|snRNP-U1-70K|chr2L|-	0.24	0.05	-0.19
NM_139835|mRpL50|chr3L|-	0.86	0.67	-0.19
NM_001259672|eIF5B|chr3L|-	0.58	0.39	-0.19
NM_165321|mRpS18B|chr2L|-	0.46	0.27	-0.19
NM_165556|CG30497|chr2R|-	0.81	0.62	-0.19
NM_143789|CG11899|chr3R|+	0.43	0.24	-0.19
NM_001275232|CG7519|chr3L|+	0.87	0.68	-0.19
NM_001038967|CG8927|chr3R|+	1	0.81	-0.19
NM_141633|CG8135|chr3R|+	1	0.81	-0.19
NM_001103607|CG3714|chr2L|-	0.84	0.65	-0.19
NM_140243|crim|chr3L|-	0.78	0.59	-0.19
NM_001259026|CG5850|chr2L|-	0.88	0.69	-0.19
NM_136765|CG12935|chr2R|+	0.48	0.29	-0.19
NM_130637|CG3071|chrX|+	1	0.81	-0.19
NM_168907|Hr78|chr3L|-	0.8	0.61	-0.19
NM_001273465|CycY|chr2L|-	0.59	0.4	-0.19
NM_135231|CG11236|chr2L|+	0.53	0.34	-0.19
NM_001274506|CG4603|chr3L|+	0.84	0.65	-0.19
NM_139504|scramb2|chr3L|-	0.57	0.38	-0.19
NM_167520|hang|chrX|+	0.32	0.13	-0.19
NM_130663|Csat|chrX|-	0.89	0.7	-0.19
NM_079701|Mvl|chr3R|-	0.76	0.57	-0.19
NM_134824|CG16995|chr2L|+	0.49	0.3	-0.19
NM_142189|CG6236|chr3R|-	0.85	0.66	-0.19
NM_001273627|Acn|chr2L|+	0.56	0.37	-0.19
NM_001169974|bmm|chr3L|-	0.74	0.55	-0.19
NM_165770|RanBPM|chr2R|+	0.67	0.48	-0.19
NM_169548|flfl|chr3R|+	0.8	0.61	-0.19
NM_001274393|CG2034|chr3L|+	0.71	0.52	-0.19
NM_136558|CG8586|chr2R|-	0.84	0.65	-0.19
NM_167827|fwd|chr3L|-	0.84	0.65	-0.19
NM_001104116|CG14132|chr3L|-	0.8	0.61	-0.19
NM_141236|atms|chr3R|+	0.6	0.41	-0.19
NM_169774|CG31249|chr3R|-	0.77	0.58	-0.19
NM_079830|Jon99Cii|chr3R|-	1	0.82	-0.18
NM_001272893|RpLP1|chr2L|+	0.27	0.09	-0.18
NM_170460|RpL32|chr3R|-	0.4	0.22	-0.18
NM_168266|Idh|chr3L|-	1	0.82	-0.18
NM_168534|RpS12|chr3L|+	0.42	0.24	-0.18
NM_133136|Mur18B|chrX|+	1	0.82	-0.18
NM_137186|CG8157|chr2R|-	0.55	0.37	-0.18
NM_079273|Hsp26|chr3L|-	1	0.82	-0.18
NM_132836|CG8206|chrX|+	1	0.82	-0.18
NM_132844|CG8952|chrX|-	0.93	0.75	-0.18
NM_001274929|CG18649|chr3L|-	0.38	0.2	-0.18
NM_169469|Hsp70Ba|chr3R|-	0.72	0.54	-0.18
NM_057931|Lcp65Ac|chr3L|+	0.63	0.45	-0.18
NM_135196|CG9547|chr2L|-	1	0.82	-0.18
NM_140760|CG7430|chr3L|+	0.44	0.26	-0.18
NM_140911|CG7433|chr3L|-	0.8	0.62	-0.18
NM_135045|CG3792|chr2L|+	1	0.82	-0.18
NM_001169281|ben|chrX|+	0.8	0.62	-0.18
NR_037753|7SLRNA:CR42652|chr3R|-	1	0.82	-0.18
NR_037753|7SLRNA:CR42652|chr3R|+	1	0.82	-0.18
NM_166045|SelD|chr2R|-	1	0.82	-0.18
NM_078808|Pros35|chr2L|+	0.53	0.35	-0.18
NM_130496|Roc1a|chrX|+	0.71	0.53	-0.18
NM_001274225|CG4019|chr2R|-	0.57	0.39	-0.18
NM_001272998|Rab5|chr2L|-	0.88	0.7	-0.18
NM_135960|CG17331|chr2L|-	0.65	0.47	-0.18
NM_080097|beta'Cop|chr2L|+	0.93	0.75	-0.18
NM_132717|CG11590|chrX|+	1	0.82	-0.18
NM_001273573|Tpr2|chr2L|+	0.38	0.2	-0.18
NM_001103812|CG34232|chr2R|-	0.75	0.57	-0.18
NM_134534|obst-A|chrX|+	0.32	0.14	-0.18
NM_080214|Spn55B|chr2R|+	0.55	0.37	-0.18
NM_001275397|CG1943|chr3R|+	0.66	0.48	-0.18
NM_141971|CG5724|chr3R|+	0.86	0.68	-0.18
NM_165676|ced-6|chr2R|-	0.97	0.79	-0.18
NM_135080|CG12512|chr2L|-	0.26	0.08	-0.18
NM_001273410|mRpS7|chr2L|+	0.71	0.53	-0.18
NM_143781|l(2)08717|chr2R|-	0.91	0.73	-0.18
NM_057933|Alas|chr2R|+	0.71	0.53	-0.18
NM_001170100|CG9399|chr3R|-	0.76	0.58	-0.18
NM_138107|CG4781|chr2R|-	0.66	0.48	-0.18
NM_137509|CG5482|chr2R|-	0.65	0.47	-0.18
NM_140592|MED10|chr3L|+	0.48	0.3	-0.18
NM_139370|CG12004|chr3L|+	0.73	0.55	-0.18
NM_166783|gw|chr4|-	0.32	0.14	-0.18
NM_079916|Gyk|chr3L|-	0.3	0.12	-0.18
NM_139527|CG14966|chr3L|-	0.9	0.72	-0.18
NM_138108|CG3663|chr2R|+	0.48	0.3	-0.18
NM_142184|CG4338|chr3R|+	1	0.82	-0.18
NM_142074|Npc2b|chr3R|+	0.73	0.55	-0.18
NM_137495|GstE11|chr2R|+	0.6	0.42	-0.18
NM_140330|ver|chr3L|+	1	0.82	-0.18
NM_170231|Npl4|chr3R|-	0.4	0.22	-0.18
NM_142386|CG7523|chr3R|-	0.58	0.4	-0.18
NM_136899|Cyp6g1|chr2R|+	0.43	0.25	-0.18
NM_144351|pont|chr3R|+	0.47	0.29	-0.18
NM_132771|CG15027|chrX|-	0.93	0.75	-0.18
NM_001103968|Sesn|chr2R|+	0.91	0.73	-0.18
NM_170297|Tsp97E|chr3R|-	0.29	0.11	-0.18
NM_001273913|Mef2|chr2R|-	0.95	0.77	-0.18
NM_137387|CG14480|chr2R|+	0.67	0.49	-0.18
NM_001260170|RpII15|chr3R|+	0.8	0.62	-0.18
NM_001272933|CG43348|chr2L|+	0.24	0.06	-0.18
NM_141040|pzg|chr3L|+	0.36	0.18	-0.18
NM_142672|CG5630|chr3R|+	0.78	0.6	-0.18
NM_001272643|Scamp|chrX|-	0.42	0.24	-0.18
NM_001273047|CG3558|chr2L|+	0.86	0.68	-0.18
NM_001144169|CAP|chr2R|+	0.25	0.07	-0.18
NM_165368|Mio|chr2L|-	0.7	0.52	-0.18
NM_001201744|Tao|chrX|-	0.66	0.48	-0.18
NM_144382|CG3021|chrX|+	0.78	0.6	-0.18
NM_141355|Obp83cd|chr3R|+	0.39	0.21	-0.18
NM_142192|CG31301|chr3R|+	0.43	0.25	-0.18
NM_135783|CG16820|chr2L|+	0.39	0.21	-0.18
NM_001144629|CG31145|chr3R|-	0.94	0.76	-0.18
NM_168825|Prp3|chr3L|+	0.84	0.66	-0.18
NM_001274650|Unr|chr3L|-	0.76	0.58	-0.18
NM_132075|CG3781|chrX|+	0.66	0.48	-0.18
NM_001273579|grp|chr2L|+	0.75	0.57	-0.18
NM_132334|BCL7-like|chrX|+	0.9	0.72	-0.18
NM_135037|Jon25Biii|chr2L|-	0.86	0.69	-0.17
NM_165618|Jon44E|chr2R|+	0.98	0.81	-0.17
NM_080173|GstD2|chr3R|+	1	0.83	-0.17
NM_165744|14-3-3zeta|chr2R|+	0.51	0.34	-0.17
NM_137600|Obp56d|chr2R|-	0.48	0.31	-0.17
NM_080275|nol|chr3L|+	0.92	0.75	-0.17
NM_140935|CG17145|chr3L|+	0.95	0.78	-0.17
NM_140648|CG4169|chr3L|+	0.91	0.74	-0.17
NM_166217|GstS1|chr2R|-	0.9	0.73	-0.17
NM_137442|CG10911|chr2R|-	0.76	0.59	-0.17
NM_001032249|Zasp52|chr2R|-	1	0.83	-0.17
NM_142571|CG6300|chr3R|-	0.93	0.76	-0.17
NM_001258831|CG14207|chrX|+	0.4	0.23	-0.17
NM_141001|CG4365|chr3L|+	0.98	0.81	-0.17
NM_135919|CG18477|chr2L|+	1	0.83	-0.17
NM_142791|Rpn7|chr3R|-	0.88	0.71	-0.17
NM_144370|Ugt36Bc|chr2L|+	0.92	0.75	-0.17
NM_079640|FK506-bp1|chr3R|-	0.65	0.48	-0.17
NM_139681|CG13705|chr3L|+	0.91	0.74	-0.17
NM_141631|CG8132|chr3R|+	0.97	0.8	-0.17
NM_079126|Cyp9c1|chr2R|+	0.67	0.5	-0.17
NM_164750|CG5973|chr2L|+	0.86	0.69	-0.17
NM_140319|CG10616|chr3L|+	1	0.83	-0.17
NM_136277|CG1416|chr2L|+	0.47	0.3	-0.17
NM_165398|CG1416|chr2L|+	0.54	0.37	-0.17
NM_135689|CG12264|chr2L|+	0.64	0.47	-0.17
NR_073978|CR44134|chr3R|+	1	0.83	-0.17
NM_001258848|Sdic1|chrX|-	0.18	0.01	-0.17
NM_001104125|CG34242|chr3L|+	0.28	0.11	-0.17
NM_001103686|CG44085|chr2L|+	0.25	0.08	-0.17
NM_169303|Unc-115b|chr3R|-	0.69	0.52	-0.17
NM_167803|Gyk|chr3L|-	0.28	0.11	-0.17
NM_001015320|eIF-4B|chr2RHet|+	0.68	0.51	-0.17
NM_141655|CG9396|chr3R|-	0.92	0.75	-0.17
NM_206640|Tom40|chrX|+	0.75	0.58	-0.17
NM_079625|su(Hw)|chr3R|-	1	0.83	-0.17
NM_001275135|HLH106|chr3L|+	0.67	0.5	-0.17
NM_001144527|CG33169|chr3L|+	0.54	0.37	-0.17
NM_130567|rush|chrX|+	0.51	0.34	-0.17
NM_001273912|Mef2|chr2R|-	1	0.83	-0.17
NM_138021|CG3860|chr2R|-	0.62	0.45	-0.17
NM_142081|twf|chr3R|+	0.87	0.7	-0.17
NM_136250|Nbr|chr2L|-	1	0.83	-0.17
NM_134278|sgg|chrX|+	0.77	0.6	-0.17
NM_135370|CG7778|chr2L|+	0.84	0.67	-0.17
NM_001144543|CG1021|chr3R|-	0.99	0.82	-0.17
NM_169941|Calx|chr3R|+	0.97	0.8	-0.17
NM_001169971|CG9628|chr3L|+	1	0.83	-0.17
NM_137089|CG8323|chr2R|+	0.81	0.64	-0.17
NM_057852|Lectin-galC1|chr2L|+	0.61	0.44	-0.17
NM_001258771|sd|chrX|+	0.4	0.23	-0.17
NM_137997|CG5597|chr2R|+	0.41	0.24	-0.17
NM_078535|Nrg|chrX|+	0.58	0.41	-0.17
NM_165664|CG8026|chr2R|-	0.74	0.57	-0.17
NM_130600|CG14806|chrX|+	0.61	0.44	-0.17
NM_001169561|Mio|chr2L|-	0.69	0.52	-0.17
NM_001274323|CG2199|chr3L|-	1	0.83	-0.17
NM_166372|hrg|chr2R|-	0.28	0.11	-0.17
NM_135753|CG9934|chr2L|-	0.51	0.34	-0.17
NM_001169496|CG9934|chr2L|-	0.57	0.4	-0.17
NM_142622|CG4360|chr3R|-	1	0.83	-0.17
NM_134989|morgue|chr2L|-	0.99	0.82	-0.17
NM_141557|CG8043|chr3R|+	0.91	0.74	-0.17
NM_168589|CG9238|chr3L|-	0.58	0.41	-0.17
NM_079769|Hr96|chr3R|+	0.79	0.62	-0.17
NM_140084|CG18180|chr3L|+	0.98	0.82	-0.16
NM_001169509|CG34166|chr2L|+	0.42	0.26	-0.16
NM_164955|RpL9|chr2L|-	0.75	0.59	-0.16
NM_143619|RpL6|chr3R|-	0.65	0.49	-0.16
NM_167998|CG32276|chr3L|-	0.69	0.53	-0.16
NM_132921|CG9673|chrX|-	0.83	0.67	-0.16
NM_139825|CG15829|chr3L|+	0.4	0.24	-0.16
NM_167272|ran|chrX|-	0.78	0.62	-0.16
NM_135517|eEF1delta|chr2L|+	0.77	0.61	-0.16
NM_143756|cathD|chr2R|-	0.31	0.15	-0.16
NM_144096|CG15353|chr2L|-	0.21	0.05	-0.16
NM_135872|CG15282|chr2L|+	0.25	0.09	-0.16
NM_079822|Pglym78|chr3R|+	0.6	0.44	-0.16
NM_139518|CG12079|chr3L|-	0.93	0.77	-0.16
NM_134971|CG15423|chr2L|+	0.65	0.49	-0.16
NM_168873|CG4365|chr3L|+	0.98	0.82	-0.16
NM_001169294|MSBP|chrX|-	0.64	0.48	-0.16
NM_001274546|ImpL3|chr3L|-	0.49	0.33	-0.16
NM_168994|lost|chr3R|+	0.73	0.57	-0.16
NM_136267|Lamp1|chr2L|+	0.56	0.4	-0.16
NM_168158|Cpr65Av|chr3L|-	0.26	0.1	-0.16
NM_135275|CG5958|chr2L|-	0.39	0.23	-0.16
NM_079639|mRpL9|chr3R|+	1	0.84	-0.16
NM_001273582|CG17331|chr2L|-	0.52	0.36	-0.16
NM_001275156|Tom20|chr3L|+	0.45	0.29	-0.16
NM_132069|vanin-like|chrX|-	0.45	0.29	-0.16
NM_142953|CG6000|chr3R|+	0.99	0.83	-0.16
NM_164918|CG5096|chr2L|+	0.64	0.48	-0.16
NM_142687|CG5793|chr3R|+	0.89	0.73	-0.16
NM_135188|mmy|chr2L|-	0.87	0.71	-0.16
NM_079541|alpha-Est5|chr3R|-	0.87	0.71	-0.16
NM_139499|CG2107|chr3L|+	0.24	0.08	-0.16
NM_143656|CG1674|chr4|+	0.76	0.6	-0.16
NM_001274435|ZnT63C|chr3L|+	1	0.84	-0.16
NM_057914|Amyrel|chr2R|-	0.82	0.66	-0.16
NM_136830|kappaTry|chr2R|-	0.76	0.6	-0.16
NM_001014455|PNUTS|chr2L|+	0.99	0.83	-0.16
NM_001014558|CG33514|chr3L|+	0.64	0.48	-0.16
NM_001170157|gish|chr3R|+	0.24	0.08	-0.16
NM_001014627|gish|chr3R|+	0.23	0.07	-0.16
NM_001144468|CG34242|chr3L|+	0.27	0.11	-0.16
NM_143400|beta4GalNAcTB|chr3R|-	1	0.84	-0.16
NM_138104|CG4741|chr2R|-	0.59	0.43	-0.16
NM_080017|Uba2|chr3L|-	0.91	0.75	-0.16
NM_078882|mRpS18B|chr2L|-	0.31	0.15	-0.16
NM_176177|Ranbp11|chr2R|+	1	0.84	-0.16
NM_133126|CG7556|chrX|-	0.77	0.61	-0.16
NM_142185|MRG15|chr3R|-	1	0.84	-0.16
NM_078710|Hlc|chrX|-	0.28	0.12	-0.16
NM_001272932|CG5001|chr2L|+	0.81	0.65	-0.16
NM_137502|CG5323|chr2R|+	0.44	0.28	-0.16
NM_134850|Drp1|chr2L|-	0.49	0.33	-0.16
NM_078931|lin19|chr2R|+	0.56	0.4	-0.16
NM_137989|Nxt1|chr2R|-	0.55	0.39	-0.16
NM_168012|CG14968|chr3L|-	0.78	0.62	-0.16
NM_135307|Herp|chr2L|-	0.53	0.37	-0.16
NM_169113|CG1213|chr3R|+	1	0.84	-0.16
NM_206223|CG33229|chr3L|+	0.57	0.41	-0.16
NM_001169178|sgg|chrX|+	0.75	0.59	-0.16
NM_141885|Ect3|chr3R|+	1	0.84	-0.16
NM_136373|Fmo-2|chr2R|-	0.51	0.35	-0.16
NM_206023|Atf6|chr2R|+	0.87	0.71	-0.16
NM_001273508|Ski6|chr2L|-	1	0.84	-0.16
NM_143325|ALiX|chr3R|-	0.53	0.37	-0.16
NM_206209|l(2)tid|chr2R|+	0.69	0.53	-0.16
NM_079713|E2f|chr3R|-	0.81	0.65	-0.16
NM_001273949|Rpb5|chr2R|-	0.4	0.24	-0.16
NM_165854|PI31|chr2R|-	0.54	0.38	-0.16
NM_206171|par-1|chr2R|+	0.68	0.52	-0.16
NM_001276230|CG41378|chr2RHet|-	0.27	0.11	-0.16
NM_058090|Tehao|chr2L|+	1	0.84	-0.16
NM_136273|Cul-2|chr2L|+	0.61	0.45	-0.16
NM_143312|wdb|chr3R|-	0.5	0.34	-0.16
NM_166466|CG10082|chr2R|+	1	0.84	-0.16
NM_140519|CG7739|chr3L|-	0.62	0.46	-0.16
NM_135402|PrBP|chr2L|-	0.57	0.41	-0.16
NM_137255|CG15706|chr2R|-	0.8	0.64	-0.16
NM_132095|CG3918|chrX|+	0.8	0.64	-0.16
NM_169325|Fmr1|chr3R|-	0.78	0.62	-0.16
NM_164434|Eno|chr2L|-	0.94	0.79	-0.15
NM_001274433|Hsp83|chr3L|+	1	0.85	-0.15
NM_167680|CoVIb|chrX|-	0.39	0.24	-0.15
NM_165865|Oda|chr2R|-	0.38	0.23	-0.15
NM_001272644|Ahcy13|chrX|+	1	0.85	-0.15
NM_169841|Xrp1|chr3R|+	0.88	0.73	-0.15
NM_057217|Gpdh|chr2L|+	0.23	0.08	-0.15
NM_001169607|CG30382|chr2R|-	0.64	0.49	-0.15
NM_166868|TRAM|chrX|+	0.92	0.77	-0.15
NM_168767|CG32198|chr3L|+	0.41	0.26	-0.15
NM_001273844|Aldh-III|chr2R|-	1	0.85	-0.15
NM_079833|Nlp|chr3R|+	0.66	0.51	-0.15
NM_078968|etaTry|chr2R|-	0.98	0.83	-0.15
NM_169751|CG31267|chr3R|+	1	0.85	-0.15
NM_134687|CG2789|chr2L|+	0.47	0.32	-0.15
NM_141649|AP-47|chr3R|-	1	0.85	-0.15
NM_079309|yps|chr3L|-	0.71	0.56	-0.15
NM_165063|Arpc1|chr2L|-	0.87	0.72	-0.15
NM_141108|CG7414|chr3L|+	0.57	0.42	-0.15
NM_135766|CG16974|chr2L|-	1	0.85	-0.15
NM_001275916|Gclm|chr3R|-	0.4	0.25	-0.15
NM_079590|Ugt35a|chr3R|-	0.86	0.71	-0.15
NM_001169744|CG13868|chr2R|-	0.29	0.14	-0.15
NM_136210|CG9319|chr2L|-	1	0.85	-0.15
NM_001103384|CG17636|chrX|-	0.93	0.78	-0.15
NM_169085|CG31548|chr3R|-	0.53	0.38	-0.15
NM_001273069|CG17593|chr2L|+	0.27	0.12	-0.15
NM_001259660|CG12082|chr3L|-	1	0.85	-0.15
NM_136703|sel|chr2R|-	0.57	0.42	-0.15
NR_073958|CR43944|chr3L|-	0.65	0.5	-0.15
NM_001272895|crq|chr2L|-	0.9	0.75	-0.15
NM_206764|Rbp2|chrX|+	0.57	0.42	-0.15
NM_140242|mtTFB1|chr3L|+	0.85	0.7	-0.15
NM_167050|MAPk-Ak2|chrX|-	0.54	0.39	-0.15
NM_165776|CG11777|chr2R|+	1	0.85	-0.15
NM_001274267|mRpL17|chr3L|+	0.28	0.13	-0.15
NM_001260427|alph|chr3R|+	0.56	0.41	-0.15
NM_167615|CG32549|chrX|-	0.33	0.18	-0.15
NM_142801|CG5346|chr3R|-	0.23	0.08	-0.15
NM_001275002|MED10|chr3L|+	0.46	0.31	-0.15
NM_206425|CG33217|chr3L|+	0.96	0.81	-0.15
NM_137118|CG17385|chr2R|-	0.49	0.34	-0.15
NM_143524|CG9743|chr3R|-	0.75	0.6	-0.15
NM_143801|Dek|chr2R|+	0.74	0.59	-0.15
NM_001273017|Drp1|chr2L|-	0.35	0.2	-0.15
NM_140331|nst|chr3L|-	0.33	0.18	-0.15
NM_136225|CG9336|chr2L|+	0.53	0.38	-0.15
NM_135064|CG4230|chr2L|+	0.98	0.83	-0.15
NM_001170307|CG2246|chr3R|-	0.53	0.38	-0.15
NM_001260202|msps|chr3R|+	1	0.85	-0.15
NM_001201820|Ggamma30A|chr2L|+	0.6	0.45	-0.15
NM_168114|shep|chr3L|-	0.55	0.4	-0.15
NM_169575|RpII15|chr3R|+	0.82	0.67	-0.15
NM_001272989|gho|chr2L|-	0.54	0.39	-0.15
NM_137798|GM130|chr2R|-	0.9	0.75	-0.15
NM_001144280|slik|chr2R|-	0.94	0.79	-0.15
NM_143471|CG7789|chr3R|+	0.9	0.75	-0.15
NM_058072|Rep|chr2R|+	0.21	0.06	-0.15
NM_143761|Cyp6a17|chr2R|+	0.63	0.48	-0.15
NM_206767|CG9132|chrX|-	0.32	0.17	-0.15
NM_079602|GstD1|chr3R|-	1	0.86	-0.14
NM_001169505|CG31775|chr2L|-	0.45	0.31	-0.14
NM_079948|RpL30|chr2L|-	0.21	0.07	-0.14
NM_080063|Fer2LCH|chr3R|+	0.75	0.61	-0.14
NM_138096|CG4692|chr2R|-	0.86	0.72	-0.14
NM_058031|Ip259|chr2L|+	1	0.86	-0.14
NM_001273418|Ip259|chr2L|+	1	0.86	-0.14
NM_170101|Gdh|chr3R|-	0.82	0.68	-0.14
NM_167678|CoVIb|chrX|-	0.39	0.25	-0.14
NM_143773|l(2)03709|chr2R|+	1	0.86	-0.14
NM_137351|CG11395|chr2R|+	1	0.86	-0.14
NM_138146|Phk-3|chr2R|-	0.58	0.44	-0.14
NM_141619|VhaM8.9|chr3R|+	0.65	0.51	-0.14
NM_057431|Uro|chr2L|+	0.48	0.34	-0.14
NM_142607|CG4390|chr3R|-	0.96	0.82	-0.14
NM_001103813|CG34232|chr2R|-	1	0.86	-0.14
NM_170204|vig2|chr3R|+	0.9	0.76	-0.14
NM_137508|Eip55E|chr2R|+	0.93	0.79	-0.14
NM_136085|CG10650|chr2L|-	0.62	0.48	-0.14
NM_170529|Sap-r|chr3R|-	0.74	0.6	-0.14
NM_136565|PGRP-SC1b|chr2R|+	0.61	0.47	-0.14
NM_168852|fbl|chr3L|+	0.96	0.82	-0.14
NM_001275930|CG17109|chr3R|+	0.19	0.05	-0.14
NM_078551|Gip|chrX|-	0.79	0.65	-0.14
NM_167203|CG1354|chrX|+	0.86	0.72	-0.14
NM_001272460|CG1354|chrX|+	0.86	0.72	-0.14
NM_001201993|CG42806|chr2R|+	1	0.86	-0.14
NM_176440|p24-2|chr3R|-	0.51	0.37	-0.14
NM_079319|eIF-2beta|chr3L|-	0.62	0.48	-0.14
NM_130655|CG8636|chrX|-	0.65	0.51	-0.14
NM_138200|Gale|chr3L|+	0.85	0.71	-0.14
NM_057862|SdhA|chr2R|-	0.78	0.64	-0.14
NM_142848|CG17244|chr3R|+	0.75	0.61	-0.14
NM_137421|OstDelta|chr2R|-	0.66	0.52	-0.14
NM_142674|CG10827|chr3R|-	0.51	0.37	-0.14
NM_136786|Rpb5|chr2R|-	1	0.86	-0.14
NM_143729|Lk6|chr3R|-	0.53	0.39	-0.14
NM_176494|B52|chr3R|+	0.63	0.49	-0.14
NM_080309|mRpL14|chrX|-	1	0.86	-0.14
NM_168438|l(3)01239|chr3L|-	0.63	0.49	-0.14
NM_142342|CG31265|chr3R|+	0.87	0.73	-0.14
NM_164808|Mur29B|chr2L|+	0.24	0.1	-0.14
NM_080109|Hex-A|chrX|+	0.95	0.81	-0.14
NM_140901|Rpn1|chr3L|+	0.83	0.69	-0.14
NM_165696|CG1648|chr2R|-	0.81	0.67	-0.14
NM_001274823|Pbgs|chr3L|-	0.21	0.07	-0.14
NM_001276229|MFS17|chr2RHet|-	0.18	0.04	-0.14
NM_001259089|CG16974|chr2L|-	0.21	0.07	-0.14
NM_140758|CG5567|chr3L|-	0.92	0.78	-0.14
NM_078733|Rab5|chr2L|-	0.69	0.55	-0.14
NM_135553|CG5355|chr2L|-	0.61	0.47	-0.14
NM_001259424|Mlf|chr2R|-	0.95	0.81	-0.14
NM_001170289|Ppn|chr3R|-	0.88	0.74	-0.14
NM_001275170|CG17147|chr3L|+	0.78	0.64	-0.14
NM_057425|tud|chr2R|+	0.9	0.76	-0.14
NM_058091|Trap1|chr2R|-	0.22	0.08	-0.14
NM_133103|CG7280|chrX|-	0.83	0.69	-0.14
NM_135040|Scox|chr2L|-	0.63	0.49	-0.14
NM_140767|Prestin|chr3L|-	0.85	0.71	-0.14
NM_001259568|CG4741|chr2R|-	0.52	0.38	-0.14
NM_001275406|gfzf|chr3R|-	0.86	0.72	-0.14
NM_001273939|CG12895|chr2R|-	0.32	0.18	-0.14
NM_078515|CBP|chrX|+	0.81	0.67	-0.14
NM_135189|CG9536|chr2L|-	0.86	0.72	-0.14
NM_080162|mit(1)15|chrX|+	1	0.86	-0.14
NM_140086|CG16717|chr3L|+	0.94	0.8	-0.14
NM_080311|tko|chrX|-	0.58	0.44	-0.14
NM_080040|san|chr2R|+	0.64	0.5	-0.14
NM_137581|TBCB|chr2R|-	0.31	0.17	-0.14
NM_136517|RagC|chr2R|-	0.55	0.41	-0.14
NM_141194|vps24|chr3R|-	0.48	0.34	-0.14
NM_144464|CG18508|chrX|-	0.47	0.33	-0.14
NM_168493|Adk1|chr3L|-	0.41	0.27	-0.14
NM_135480|CG4592|chr2L|+	0.68	0.54	-0.14
NM_080193|l(2)tid|chr2R|+	0.67	0.53	-0.14
NM_142706|CG3308|chr3R|-	0.61	0.47	-0.14
NM_132070|Btd|chrX|-	1	0.86	-0.14
NM_142060|CG9286|chr3R|+	0.83	0.69	-0.14
NM_079760|Pp1alpha-96A|chr3R|+	0.76	0.62	-0.14
NM_080069|Ef1beta|chr2R|+	1	0.87	-0.13
NM_165847|wal|chr2R|-	1	0.87	-0.13
NM_057276|Lsp1beta|chr2L|+	1	0.87	-0.13
NM_167679|CoVIb|chrX|-	0.36	0.23	-0.13
NM_135839|CG7953|chr2L|+	0.66	0.53	-0.13
NM_137535|CG15098|chr2R|-	0.38	0.25	-0.13
NM_079212|DnaJ-1|chr3L|-	1	0.87	-0.13
NM_170206|vig2|chr3R|+	0.85	0.72	-0.13
NM_141555|CG8036|chr3R|+	0.53	0.4	-0.13
NM_135798|CG9306|chr2L|-	0.23	0.1	-0.13
NM_001272925|Pino|chr2L|-	1	0.87	-0.13
NM_001275790|Xrp1|chr3R|+	0.82	0.69	-0.13
NM_001031914|CG33713|chrX|-	1	0.87	-0.13
NM_057512|Pgd|chrX|+	0.89	0.76	-0.13
NM_135840|CG7968|chr2L|+	0.87	0.74	-0.13
NM_167001|cib|chrX|+	0.45	0.32	-0.13
NM_079663|Prx3|chr3R|-	0.84	0.71	-0.13
NM_167002|cib|chrX|+	0.45	0.32	-0.13
NM_057810|Cpr|chr2L|+	0.74	0.61	-0.13
NM_169152|CG31286|chr3R|+	1	0.87	-0.13
NM_141807|CG5214|chr3R|+	0.66	0.53	-0.13
NM_142028|CCHa2|chr3R|-	0.24	0.11	-0.13
NM_001032020|Prx5|chr3R|-	0.63	0.5	-0.13
NM_057246|ifc|chr2L|+	0.71	0.58	-0.13
NM_001032232|Pex6|chr2R|+	0.86	0.73	-0.13
NM_001104032|CG15019|chr3L|-	0.33	0.2	-0.13
NM_143628|CG1890|chr3R|+	0.32	0.19	-0.13
NM_134849|Arpc5|chr2L|+	0.87	0.74	-0.13
NM_001274712|CG6767|chr3L|-	0.77	0.64	-0.13
NM_080334|mRpL30|chrX|+	0.8	0.67	-0.13
NM_079537|alpha-Est7|chr3R|-	0.54	0.41	-0.13
NM_057769|Cyp4e2|chr2R|+	0.52	0.39	-0.13
NM_001259492|hts|chr2R|-	0.28	0.15	-0.13
NM_166349|hts|chr2R|-	0.28	0.15	-0.13
NM_079543|alpha-Est3|chr3R|-	0.84	0.71	-0.13
NM_001170279|Men-b|chr3R|+	0.72	0.59	-0.13
NM_058055|JTBR|chr3L|-	1	0.87	-0.13
NM_205999|cact|chr2L|-	0.9	0.77	-0.13
NM_001104402|CG34376|chr3R|+	1	0.87	-0.13
NM_166674|Letm1|chr2R|-	0.86	0.73	-0.13
NM_170462|CG7943|chr3R|+	0.99	0.86	-0.13
NM_134889|CG9643|chr2L|-	0.99	0.86	-0.13
NM_001042931|CG17493|chr2L|+	0.59	0.46	-0.13
NM_142944|CG5902|chr3R|+	0.84	0.71	-0.13
NM_001170234|CG5902|chr3R|+	0.84	0.71	-0.13
NM_167579|CG15814|chrX|-	0.5	0.37	-0.13
NM_140525|CG12304|chr3L|+	0.73	0.6	-0.13
NM_079653|Bin1|chr3R|-	0.62	0.49	-0.13
NM_167795|Pdk1|chr3L|+	0.9	0.77	-0.13
NM_136551|CG8735|chr2R|-	0.18	0.05	-0.13
NM_167902|ABCB7|chr3L|+	0.3	0.17	-0.13
NM_001202238|tacc|chr3R|-	0.28	0.15	-0.13
NM_166198|Dek|chr2R|+	0.75	0.62	-0.13
NM_141686|CG9471|chr3R|-	0.88	0.75	-0.13
NM_138138|CG2811|chr2R|-	0.58	0.45	-0.13
NM_001258691|CG34348|chrX|+	0.97	0.84	-0.13
NM_079727|CSN6|chr3R|+	0.78	0.65	-0.13
NM_080200|mRpL4|chr2L|-	0.46	0.33	-0.13
NM_139473|CG16985|chr3L|+	0.23	0.1	-0.13
NM_001169212|CG4558|chrX|+	0.99	0.86	-0.13
NM_175947|CG33128|chr2L|+	1	0.88	-0.12
NM_166383|RpS18|chr2R|+	0.59	0.47	-0.12
NM_137111|Arc1|chr2R|-	0.89	0.77	-0.12
NM_140480|CG12310|chr3L|-	0.21	0.09	-0.12
NM_135805|RpL24|chr2L|-	0.33	0.21	-0.12
NM_001258978|eIF-4a|chr2L|+	0.27	0.15	-0.12
NM_166027|Cp1|chr2R|+	0.99	0.87	-0.12
NM_140933|CG7017|chr3L|-	0.95	0.83	-0.12
NM_057222|Gs1|chr2L|+	0.83	0.71	-0.12
NM_001273425|Fatp|chr2L|-	1	0.88	-0.12
NM_132251|CG15347|chrX|-	0.81	0.69	-0.12
NM_080321|ng3|chrX|-	0.86	0.74	-0.12
NM_001274227|l(2)efl|chr2R|-	0.71	0.59	-0.12
NM_080243|Peritrophin-15b|chr2L|-	0.72	0.6	-0.12
NM_168124|Msr-110|chr3L|-	0.4	0.28	-0.12
NM_001273153|His3.3A|chr2L|+	0.29	0.17	-0.12
NM_078861|VhaSFD|chr2L|-	0.48	0.36	-0.12
NR_073792|pncr003:2L|chr2L|+	0.78	0.66	-0.12
NM_142026|Droj2|chr3R|+	0.83	0.71	-0.12
NM_141718|Npc2d|chr3R|-	0.57	0.45	-0.12
NM_001170146|Caf1|chr3R|+	1	0.88	-0.12
NM_169936|Atpalpha|chr3R|+	0.52	0.4	-0.12
NM_001110921|uex|chr2RHet|-	0.18	0.06	-0.12
NM_001169593|l(2)01289|chr2R|-	1	0.88	-0.12
NM_079875|mod|chr3R|+	0.8	0.68	-0.12
NM_001144202|ATPCL|chr2R|-	0.28	0.16	-0.12
NM_001202107|CG1246|chr3L|+	0.95	0.83	-0.12
NM_001273873|Lcp2|chr2R|-	0.23	0.11	-0.12
NM_001169713|Mapmodulin|chr2R|-	0.8	0.68	-0.12
NM_167466|Chc|chrX|-	0.51	0.39	-0.12
NM_001103884|CG34191|chr2R|+	0.73	0.61	-0.12
NM_001032056|Pp2A-29B|chr2L|+	0.53	0.41	-0.12
NM_001201738|CG6762|chrX|+	0.75	0.63	-0.12
NM_168851|fbl|chr3L|+	0.57	0.45	-0.12
NM_078716|mRpL10|chr2L|+	0.93	0.81	-0.12
NM_001272608|Clic|chrX|-	0.52	0.4	-0.12
NM_164885|Trp1|chr2L|+	0.95	0.83	-0.12
NM_142280|CG42446|chr3R|-	0.57	0.45	-0.12
NM_001275640|CG8066|chr3R|-	0.31	0.19	-0.12
NM_134500|Ubqn|chrX|+	0.72	0.6	-0.12
NM_132508|CG1703|chrX|+	0.92	0.8	-0.12
NM_078695|Rab10|chrX|+	0.42	0.3	-0.12
NM_057766|noi|chr3R|-	1	0.88	-0.12
NM_142697|CG5862|chr3R|+	0.87	0.75	-0.12
NM_001272831|CG32521|chrX|-	0.61	0.49	-0.12
NM_001273763|CG17493|chr2L|+	0.61	0.49	-0.12
NM_057510|drk|chr2R|-	0.48	0.36	-0.12
NM_001202064|CG9849|chr2R|+	0.85	0.73	-0.12
NM_141252|CG1124|chr3R|+	0.2	0.08	-0.12
NM_078715|l(2)gl|chr2L|-	0.58	0.46	-0.12
NM_079158|LysB|chr3L|+	1	0.89	-0.11
NM_057668|chic|chr2L|-	0.59	0.48	-0.11
NM_057786|RpL22|chrX|-	0.4	0.29	-0.11
NM_166265|pAbp|chr2R|+	0.53	0.42	-0.11
NM_169798|14-3-3epsilon|chr3R|+	0.3	0.19	-0.11
NM_132882|CG3560|chrX|+	0.59	0.48	-0.11
NM_136514|Obp44a|chr2R|-	0.69	0.58	-0.11
NR_004370|CR41602|chrXHet|+	0.32	0.21	-0.11
NM_167669|CG14207|chrX|+	0.23	0.12	-0.11
NM_142745|CG6028|chr3R|-	0.81	0.7	-0.11
NM_134493|Sec61gamma|chrX|+	0.54	0.43	-0.11
NM_058042|skpA|chrX|+	0.52	0.41	-0.11
NM_001275151|RhoGDI|chr3L|+	0.66	0.55	-0.11
NM_135161|CG9486|chr2L|+	1	0.89	-0.11
NM_137718|Glycogenin|chr2R|+	0.56	0.45	-0.11
NM_001274576|CG8602|chr3L|-	1	0.89	-0.11
NM_001273016|Arpc5|chr2L|+	0.15	0.04	-0.11
NM_079959|bgm|chr2L|+	0.74	0.63	-0.11
NM_058022|NTPase|chr2L|-	0.49	0.38	-0.11
NM_132628|CG15717|chrX|+	0.86	0.75	-0.11
NM_001258699|CkIIbeta|chrX|+	0.27	0.16	-0.11
NM_078860|Tpr2|chr2L|+	0.66	0.55	-0.11
NM_080762|CkIIbeta|chrX|+	0.26	0.15	-0.11
NM_001015321|eIF-4B|chr2RHet|+	0.69	0.58	-0.11
NM_142901|CG10182|chr3R|-	0.58	0.47	-0.11
NM_001014614|pug|chr3R|+	0.38	0.27	-0.11
NM_136618|shrb|chr2R|-	0.66	0.55	-0.11
NM_132485|Tim8|chrX|+	0.49	0.38	-0.11
NM_169715|CG17931|chr3R|-	0.56	0.45	-0.11
NM_079991|Inx3|chr3R|-	0.9	0.79	-0.11
NM_168019|Drsl2|chr3L|+	0.27	0.16	-0.11
NM_080220|Rbp2|chrX|+	0.5	0.39	-0.11
NM_168678|Baldspot|chr3L|-	0.82	0.71	-0.11
NM_001260074|RhoL|chr3R|-	0.42	0.31	-0.11
NM_136961|CG8778|chr2R|-	0.75	0.64	-0.11
NM_135332|baf|chr2L|+	0.59	0.48	-0.11
NM_137319|CG6426|chr2R|+	0.25	0.14	-0.11
NM_135090|CG7277|chr2L|-	0.89	0.78	-0.11
NM_001169648|Roc2|chr2R|-	0.13	0.02	-0.11
NM_001274037|CG18327|chr2R|+	0.96	0.85	-0.11
NM_137756|CG9865|chr2R|-	0.83	0.72	-0.11
NM_001259959|jim|chr3L|-	0.14	0.03	-0.11
NM_001014688|PMCA|chr4|-	0.46	0.35	-0.11
NM_001274063|row|chr2R|-	1	0.89	-0.11
NM_135943|CG5869|chr2L|-	0.31	0.2	-0.11
NM_078633|Stim|chrX|-	0.18	0.07	-0.11
NM_132394|CG17841|chrX|+	0.77	0.66	-0.11
NM_079879|RpS3A|chr4|-	0.72	0.62	-0.1
NM_135592|CG7299|chr2L|-	1	0.9	-0.1
NM_141790|SdhC|chr3R|-	1	0.9	-0.1
NR_033152|CR42491|chrX|-	0.49	0.39	-0.1
NM_169797|14-3-3epsilon|chr3R|+	0.3	0.2	-0.1
NM_138034|eIF-5A|chr2R|+	0.55	0.45	-0.1
NM_167015|ctp|chrX|+	0.33	0.23	-0.1
NM_168207|pst|chr3L|-	0.96	0.86	-0.1
NM_134862|CG9894|chr2L|+	0.29	0.19	-0.1
NM_141070|VhaM9.7-b|chr3L|+	0.45	0.35	-0.1
NM_132357|CG1468|chrX|+	0.79	0.69	-0.1
NM_001104452|CG5028|chr3R|+	0.14	0.04	-0.1
NM_057854|Prosalpha5|chr2R|+	0.93	0.83	-0.1
NM_143446|CG1907|chr3R|+	0.87	0.77	-0.1
NM_137481|GstE3|chr2R|+	0.83	0.73	-0.1
NM_142572|CG11659|chr3R|-	0.79	0.69	-0.1
NM_080174|GstD4|chr3R|+	0.89	0.79	-0.1
NM_143767|Spn27A|chr2L|-	0.99	0.89	-0.1
NM_001275310|CG40045|chr3L|+	0.61	0.51	-0.1
NM_139979|GstO2|chr3L|-	0.85	0.75	-0.1
NM_168673|mbf1|chr3L|+	0.26	0.16	-0.1
NM_130731|Vap-33-1|chrX|+	0.44	0.34	-0.1
NM_001259848|CG18081|chr3L|-	0.25	0.15	-0.1
NM_079428|CSN1b|chr3L|-	1	0.9	-0.1
NM_164515|NTPase|chr2L|-	0.49	0.39	-0.1
NM_141806|CG17734|chr3R|-	0.44	0.34	-0.1
NM_135693|CG6766|chr2L|-	0.17	0.07	-0.1
NM_176301|ergic53|chr3L|+	0.59	0.49	-0.1
NM_167667|Tao|chrX|-	1	0.9	-0.1
NM_168877|Pka-R1|chr3L|+	0.35	0.25	-0.1
NM_142346|CG5246|chr3R|+	0.84	0.74	-0.1
NM_001273472|Qtzl|chr2L|+	0.27	0.17	-0.1
NM_169045|mtd|chr3R|-	0.83	0.73	-0.1
NM_168950|Csp|chr3L|+	0.91	0.81	-0.1
NM_141043|Cpr78Cc|chr3L|+	0.79	0.69	-0.1
NM_079093|Fib|chr2R|-	0.76	0.66	-0.1
NM_079743|TfIIA-S|chr3R|-	0.62	0.52	-0.1
NR_002097|roX1|chrX|-	0.87	0.77	-0.1
NM_058032|Fpps|chr2R|-	0.48	0.38	-0.1
NM_141167|CG11137|chr3L|-	0.65	0.55	-0.1
NM_176561|CG33095|chr3R|+	1	0.9	-0.1
NM_167693|Sdic3|chrX|-	0.47	0.37	-0.1
NM_001259010|Snx6|chr2L|-	0.76	0.66	-0.1
NM_141937|CG17202|chr3R|+	0.89	0.79	-0.1
NM_078490|snf|chrX|+	0.53	0.43	-0.1
NM_165330|CG31683|chr2L|-	0.22	0.12	-0.1
NM_001273699|CG18858|chr2L|-	0.22	0.12	-0.1
NM_142116|CG14852|chr3R|+	0.39	0.29	-0.1
NM_001276039|RpL27|chr3R|-	0.2	0.11	-0.09
NM_168537|RpS4|chr3L|+	0.76	0.67	-0.09
NM_079251|RpL14|chr3L|+	0.6	0.51	-0.09
NM_001273874|Lcp3|chr2R|+	0.19	0.1	-0.09
NR_048206|CR42862|chr3L|+	0.99	0.9	-0.09
NM_001259134|CG6453|chr2L|-	1	0.91	-0.09
NM_167724|Mgstl|chrX|+	0.59	0.5	-0.09
NM_168291|Prm|chr3L|-	0.42	0.33	-0.09
NM_001144664|CG42376|chrX|+	1	0.91	-0.09
NM_205909|eIF-3p40|chr2L|-	0.73	0.64	-0.09
NM_079545|alpha-Est1|chr3R|-	0.98	0.89	-0.09
NM_169251|CG11980|chr3R|+	1	0.91	-0.09
NM_132838|Tcp-1zeta|chrX|+	0.93	0.84	-0.09
NM_139846|CG8602|chr3L|-	1	0.91	-0.09
NM_001043071|Sod3|chr2R|-	0.13	0.04	-0.09
NM_206316|CG33493|chr3L|-	0.96	0.87	-0.09
NM_001169423|Kr-h2|chr2L|+	0.88	0.79	-0.09
NM_138207|CG3344|chr3L|-	0.36	0.27	-0.09
NM_079245|Nmt|chr3L|-	0.96	0.87	-0.09
NM_134578|Ntf-2|chrX|+	0.55	0.46	-0.09
NM_164358|Sam-S|chr2L|+	0.37	0.28	-0.09
NM_168129|Ubp64E|chr3L|+	1	0.91	-0.09
NM_140638|Aats-tyr|chr3L|-	0.96	0.87	-0.09
NM_001273485|CG5446|chr2L|-	0.16	0.07	-0.09
NM_001275366|elm|chr3R|-	0.36	0.27	-0.09
NM_001273918|Pfk|chr2R|+	0.89	0.8	-0.09
NM_001202034|CG43164|chr2R|+	0.94	0.85	-0.09
NM_001014594|Pka-R1|chr3L|+	0.43	0.34	-0.09
NM_170019|CG5315|chr3R|-	0.3	0.21	-0.09
NM_001273572|Tpr2|chr2L|+	0.31	0.22	-0.09
NM_001032269|sm|chr2R|-	1	0.91	-0.09
NM_001260395|CG31075|chr3R|-	0.69	0.6	-0.09
NM_142637|CG10877|chr3R|-	0.9	0.81	-0.09
NM_001014702|CG33521|chr4|+	1	0.91	-0.09
NM_140199|scyl|chr3L|+	0.86	0.77	-0.09
NM_001031991|CG43674|chr3R|+	0.76	0.67	-0.09
NM_001275029|Mo25|chr3L|-	0.9	0.81	-0.09
NM_057825|Reg-5|chr2R|-	1	0.91	-0.09
NM_001202126|Sh3beta|chr3L|-	0.49	0.4	-0.09
NM_001144473|Wbp2|chr3L|+	0.41	0.32	-0.09
NM_134942|CG17593|chr2L|+	0.74	0.65	-0.09
NM_135492|CG4747|chr2L|+	0.91	0.82	-0.09
NM_142926|Lsd-1|chr3R|+	0.45	0.36	-0.09
NM_141420|Ccp84Ag|chr3R|+	0.12	0.03	-0.09
NM_058133|ligatin|chr3R|-	1	0.91	-0.09
NM_136389|Eb1|chr2R|+	0.67	0.58	-0.09
NM_134674|CG11911|chr2L|-	0.93	0.85	-0.08
NM_135441|Aldh|chr2L|+	0.98	0.9	-0.08
NM_057291|Mlc1|chr3R|-	0.12	0.04	-0.08
NM_170554|RpL6|chr3R|-	0.89	0.81	-0.08
NM_080373|epsilonTry|chr2R|-	0.83	0.75	-0.08
NM_001258977|chic|chr2L|-	0.25	0.17	-0.08
NM_135948|CaBP1|chr2L|-	1	0.92	-0.08
NM_135695|CG6770|chr2L|-	0.53	0.45	-0.08
NM_169966|CG31198|chr3R|+	0.73	0.65	-0.08
NM_001275543|SdhC|chr3R|-	0.13	0.05	-0.08
NM_001259708|CG4769|chr3L|+	0.87	0.79	-0.08
NM_001275650|eff|chr3R|-	0.28	0.2	-0.08
NM_057560|Vha55|chr3R|-	0.33	0.25	-0.08
NM_142144|CG3731|chr3R|+	0.65	0.57	-0.08
NM_137961|levy|chr2R|+	0.68	0.6	-0.08
NM_143753|VhaPPA1-1|chr3R|-	0.77	0.69	-0.08
NM_080351|Gbeta13F|chrX|+	1	0.92	-0.08
NM_001259024|Gdi|chr2L|-	0.26	0.18	-0.08
NM_001276069|BM-40-SPARC|chr3R|-	0.7	0.62	-0.08
NM_001258742|Ag5r|chrX|-	0.15	0.07	-0.08
NM_001273581|VhaSFD|chr2L|-	0.26	0.18	-0.08
NM_001259801|yps|chr3L|-	0.94	0.86	-0.08
NM_167369|CG1640|chrX|+	0.3	0.22	-0.08
NM_167365|CG1640|chrX|+	0.3	0.22	-0.08
NM_001273803|Rab2|chr2R|+	0.96	0.88	-0.08
NM_165756|Syb|chr2R|-	0.49	0.41	-0.08
NM_169503|CG32473|chr3R|+	0.83	0.75	-0.08
NM_001014598|Pka-R1|chr3L|+	0.27	0.19	-0.08
NM_001259536|CG13510|chr2R|+	0.42	0.34	-0.08
NM_001014731|CkIIbeta|chrX|+	0.92	0.84	-0.08
NM_001259212|CG17508|chr2R|+	0.22	0.14	-0.08
NM_136213|Pomp|chr2L|+	0.3	0.22	-0.08
NM_001259031|Trp1|chr2L|+	0.2	0.12	-0.08
NM_001260210|SF2|chr3R|-	0.19	0.11	-0.08
NM_001272445|His3.3B|chrX|-	0.51	0.43	-0.08
NM_135171|CG9498|chr2L|-	0.93	0.85	-0.08
NM_001275172|Clc|chr3L|+	0.51	0.43	-0.08
NM_001273370|und|chr2L|+	0.92	0.84	-0.08
NM_165699|hebe|chr2R|-	0.78	0.7	-0.08
NM_136974|mRpL18|chr2R|+	1	0.92	-0.08
NM_132768|Lsd-2|chrX|-	0.67	0.59	-0.08
NM_141659|P58IPK|chr3R|+	0.84	0.76	-0.08
NM_001038776|CG3164|chr2L|-	0.68	0.6	-0.08
NM_137095|RpS23|chr2R|-	0.11	0.04	-0.07
NM_206010|CoIV|chr2L|+	0.18	0.11	-0.07
NM_001259794|RpL10Ab|chr3L|+	0.54	0.47	-0.07
NM_164667|chic|chr2L|-	0.2	0.13	-0.07
NM_079745|Pros26.4|chr3R|-	1	0.93	-0.07
NM_058089|Vha13|chr3R|-	0.41	0.34	-0.07
NM_001258976|chic|chr2L|-	0.61	0.54	-0.07
NM_169167|CG1943|chr3R|+	1	0.93	-0.07
NM_001043301|Cnx99A|chr3R|-	1	0.93	-0.07
NM_166599|CG30415|chr2R|-	0.34	0.27	-0.07
NM_080148|Gtp-bp|chrX|-	1	0.93	-0.07
NM_057846|ATPsyn-Cf6|chr3R|-	0.54	0.47	-0.07
NR_048205|CR42862|chr3L|+	0.98	0.91	-0.07
NM_167559|CG32564|chrX|+	1	0.93	-0.07
NM_135409|CG9468|chr2L|-	0.82	0.75	-0.07
NM_057822|Rab11|chr3R|+	0.29	0.22	-0.07
NM_135190|Sec61alpha|chr2L|-	0.42	0.35	-0.07
NM_079989|eIF-1A|chr3R|+	0.55	0.48	-0.07
NM_001275166|CG7017|chr3L|-	0.58	0.51	-0.07
NM_132984|CG8661|chrX|-	0.83	0.76	-0.07
NM_001273319|Peritrophin-15b|chr2L|-	0.71	0.64	-0.07
NM_001169598|CG30159|chr2R|+	1	0.93	-0.07
NM_057259|l(2)37Cc|chr2L|-	0.89	0.82	-0.07
NM_164361|Sam-S|chr2L|+	0.7	0.63	-0.07
NM_141311|elm|chr3R|-	0.79	0.72	-0.07
NM_144243|CG13364|chrX|-	0.57	0.5	-0.07
NR_073896|CR44168|chr2R|-	0.1	0.03	-0.07
NM_079636|Tm1|chr3R|+	0.54	0.47	-0.07
NM_001202202|asf1|chr3L|+	1	0.93	-0.07
NM_001272665|Nipsnap|chrX|-	0.38	0.31	-0.07
NM_079130|Lcp9|chr2R|-	0.55	0.48	-0.07
NM_001103824|CG17574|chr2R|-	0.62	0.55	-0.07
NM_001038778|CG3662|chr2L|+	0.45	0.38	-0.07
NM_167988|CG11537|chr3L|-	0.99	0.92	-0.07
NM_142618|CG4367|chr3R|-	0.71	0.64	-0.07
NM_165319|pr|chr2L|-	0.76	0.69	-0.07
NM_135038|Jon25Bii|chr2L|-	0.9	0.84	-0.06
NM_001042975|RpL38|chr2R|-	0.74	0.68	-0.06
NM_001273289|Rack1|chr2L|-	0.24	0.18	-0.06
NM_001275098|CG3819|chr3L|-	0.99	0.93	-0.06
NM_078967|zetaTry|chr2R|-	1	0.94	-0.06
NM_001273188|eIF-4a|chr2L|+	0.24	0.18	-0.06
NM_165740|14-3-3zeta|chr2R|+	0.22	0.16	-0.06
NM_058030|Thiolase|chr2R|-	1	0.94	-0.06
NM_134283|porin|chr2L|-	0.44	0.38	-0.06
NM_001275501|Crc|chr3R|-	0.22	0.16	-0.06
NM_001273183|Gpdh|chr2L|+	0.11	0.05	-0.06
NM_001259889|CG43085|chr3L|-	1	0.94	-0.06
NM_133072|CG15043|chrX|-	0.31	0.25	-0.06
NM_165256|CG31789|chr2L|+	0.27	0.21	-0.06
NM_001032217|Df31|chr2L|-	0.1	0.04	-0.06
NM_001273708|CG9318|chr2L|-	1	0.94	-0.06
NM_001103570|Ntf-2|chrX|+	0.11	0.05	-0.06
NM_001259572|GstE12|chr2R|-	0.85	0.79	-0.06
NM_144369|Ugt86Da|chr3R|+	1	0.94	-0.06
NM_079586|Fdh|chr3R|-	0.95	0.89	-0.06
NM_079287|ATPsyn-b|chr3L|+	0.58	0.52	-0.06
NM_001272235|Actn|chrX|-	0.09	0.03	-0.06
NM_137598|Obp56a|chr2R|+	0.57	0.51	-0.06
NM_001275656|Mf|chr3R|-	0.22	0.16	-0.06
NM_078540|His3.3B|chrX|-	0.87	0.81	-0.06
NM_169296|Kap-alpha3|chr3R|-	0.12	0.06	-0.06
NM_167017|l(1)G0334|chrX|+	0.36	0.3	-0.06
NM_139702|Uev1A|chr3L|-	0.18	0.12	-0.06
NM_001274587|CG8560|chr3L|-	0.56	0.5	-0.06
NM_142526|Cyp12a4|chr3R|+	0.67	0.61	-0.06
NM_058047|alphaCop|chr3L|-	0.99	0.93	-0.06
NM_169218|DppIII|chr3R|+	0.88	0.82	-0.06
NM_140668|CG9669|chr3L|-	0.85	0.79	-0.06
NM_001103692|CG34166|chr2L|+	0.15	0.1	-0.05
NM_165091|CG31775|chr2L|-	0.12	0.07	-0.05
NM_079071|betaTub56D|chr2R|-	1	0.95	-0.05
NM_001275096|RpL26|chr3L|+	0.76	0.71	-0.05
NM_001258724|up|chrX|-	0.32	0.27	-0.05
NM_167376|up|chrX|-	0.35	0.3	-0.05
NM_001273469|CG44008|chr2L|-	0.17	0.12	-0.05
NM_169074|exba|chr3R|-	0.09	0.04	-0.05
NM_137484|GstE6|chr2R|+	0.98	0.93	-0.05
NM_164677|slmo|chr2L|-	1	0.95	-0.05
NM_001273053|CG17259|chr2L|-	0.98	0.93	-0.05
NM_058063|smt3|chr2L|-	0.84	0.79	-0.05
NM_001273062|CG12400|chr2L|-	0.07	0.02	-0.05
NM_134309|Rho1|chr2R|+	0.41	0.36	-0.05
NM_132494|CG1749|chrX|+	1	0.95	-0.05
NM_001273375|CG4598|chr2L|+	0.12	0.07	-0.05
NM_001273262|CG5177|chr2L|+	0.26	0.21	-0.05
NM_132188|CG18624|chrX|-	0.57	0.52	-0.05
NM_079983|Xbp1|chr2R|+	0.78	0.73	-0.05
NM_001273268|CG5973|chr2L|+	0.1	0.05	-0.05
NM_164616|Cg25C|chr2L|+	0.39	0.34	-0.05
NM_136757|CG12934|chr2R|+	1	0.96	-0.04
NM_001038953|GstD1|chr3R|-	0.16	0.12	-0.04
NM_139720|CG5150|chr3L|+	1	0.96	-0.04
NM_001273031|CG9894|chr2L|+	0.14	0.1	-0.04
NM_135635|dUTPase|chr2L|+	1	0.96	-0.04
NM_140276|CG43896|chr3L|+	0.99	0.95	-0.04
NM_168425|Aps|chr3L|-	1	0.96	-0.04
NM_169601|eff|chr3R|-	0.72	0.68	-0.04
NM_166427|Xbp1|chr2R|+	0.92	0.88	-0.04
NM_001273406|CG33303|chr2L|-	0.1	0.06	-0.04
NM_001272947|RFeSP|chr2L|-	0.2	0.16	-0.04
NM_080336|ctp|chrX|+	0.67	0.63	-0.04
NM_078497|Act5C|chrX|+	0.08	0.05	-0.03
NM_001273089|RpL40|chr2L|+	0.91	0.88	-0.03
NM_205913|chic|chr2L|-	0.1	0.07	-0.03
NM_136057|Jwa|chr2L|-	1	0.97	-0.03
NM_001273875|Lcp4|chr2R|+	0.72	0.69	-0.03
NM_001258601|ctp|chrX|+	0.06	0.03	-0.03
NM_176479|GstD3|chr3R|+	1	0.97	-0.03
NM_001275241|VhaM9.7-b|chr3L|+	0.12	0.09	-0.03
NM_079637|Tm2|chr3R|+	0.67	0.64	-0.03
NM_140972|mag|chr3L|+	0.26	0.23	-0.03
NM_164863|Trx-2|chr2L|+	0.18	0.15	-0.03
NM_001104198|Arf79F|chr3L|-	0.56	0.53	-0.03
NM_001110937|Ucrh|chr3LHet|+	0.12	0.09	-0.03
NM_001042925|RpL5|chr2L|-	0.04	0.02	-0.02
NM_144295|Muc26B|chr2L|+	0.11	0.09	-0.02
NM_169635|Tm1|chr3R|+	0.04	0.02	-0.02
NM_001272156|Rfabg|chr4|+	0.03	0.01	-0.02
NM_143483|RpS8|chr3R|+	0.03	0.01	-0.02
NM_001201762|RpL37A|chr2L|+	0.04	0.02	-0.02
NM_058114|decay|chr3R|-	1	0.98	-0.02
NM_143785|l(3)neo18|chr3L|-	0.05	0.03	-0.02
NM_001260350|Spase22-23|chr3R|-	0.03	0.01	-0.02
NM_001042889|l(2)06225|chr2L|-	0.11	0.09	-0.02
NM_169311|RpS29|chr3R|+	0.04	0.03	-0.01
NM_001273771|RpL38|chr2R|-	0.02	0.01	-0.01
NM_001014725|Act5C|chrX|+	0.89	0.88	-0.01
NM_142977|Spase22-23|chr3R|-	1	0.99	-0.01
NM_001274538|Cpr65Ax2|chr3L|-	0.02	0.01	-0.01
NM_140821|CG3819|chr3L|-	0.99	0.98	-0.01
NM_165253|RpS26|chr2L|-	0.04	0.03	-0.01
NM_001259348|Cam|chr2R|+	0.09	0.08	-0.01
NM_057274|Lcp4|chr2R|+	0.09	0.08	-0.01
NM_169377|RpL3|chr3R|+	0.01	0.01	0
NR_037759|CR31144|chr3R|-	0	0	0
NM_132777|RpL37a|chrX|-	0.01	0.01	0
NM_137851|CG2852|chr2R|-	0.99	1	0.01
NM_001275304|RpL10|chr3L|-	0.02	0.03	0.01
NM_142061|Dip-B|chr3R|+	0.99	1	0.01
NM_079352|Prosbeta2|chr3L|+	0.99	1	0.01
NM_001272632|RpL37a|chrX|-	0.98	1	0.02
NM_001260437|Fer1HCH|chr3R|-	0.98	1	0.02
NM_001276175|Fer1HCH|chr3R|-	0.98	1	0.02
NM_168834|CG6933|chr3L|-	0.98	1	0.02
NM_140934|CG6933|chr3L|-	0.98	1	0.02
NM_169796|14-3-3epsilon|chr3R|+	0.98	1	0.02
NM_057909|Idgf2|chr2L|+	0.98	1	0.02
NM_143267|CG6283|chr3R|-	0.88	0.9	0.02
NM_080427|RpS14b|chrX|+	0.21	0.23	0.02
NM_143730|Vha36-1|chr2R|+	0.97	1	0.03
NM_001260081|CG16817|chr3R|+	0.97	1	0.03
NM_141952|Hsp70Bc|chr3R|+	0.97	1	0.03
NM_001259114|Idgf2|chr2L|+	0.97	1	0.03
NM_169378|RpL3|chr3R|+	0.26	0.29	0.03
NM_136563|PGRP-SC1a|chr2R|+	0.91	0.94	0.03
NM_141864|CG6950|chr3R|-	0.97	1	0.03
NM_167492|CG32576|chrX|-	0.04	0.07	0.03
NM_206715|CG5541|chrX|+	0.97	1	0.03
NM_132393|l(1)G0289|chrX|-	0.97	1	0.03
NM_079068|FK506-bp2|chr2R|+	0.64	0.67	0.03
NM_143743|Ef1gamma|chr3R|+	0.96	1	0.04
NM_169799|14-3-3epsilon|chr3R|+	0.96	1	0.04
NM_143264|CG6295|chr3R|-	0.96	1	0.04
NM_130519|CG3699|chrX|-	0.96	1	0.04
NM_057743|Act87E|chr3R|+	0.96	1	0.04
NM_001259113|Idgf2|chr2L|+	0.96	1	0.04
NM_001170010|Clc|chr3L|+	0.96	1	0.04
NM_168043|Ubi-p63E|chr3L|-	0.51	0.55	0.04
NM_135113|obst-E|chr2L|-	0.96	1	0.04
NM_139760|CG10472|chr3L|-	0.82	0.86	0.04
NM_205984|CG33306|chr2L|-	0.93	0.97	0.04
NM_135339|CG12375|chr2L|-	0.96	1	0.04
NM_137070|CG16935|chr2R|-	0.96	1	0.04
NM_136987|CG13321|chr2R|+	0.46	0.5	0.04
NM_140158|CG6409|chr3L|-	0.86	0.9	0.04
NM_001260383|CG31086|chr3R|+	0.8	0.84	0.04
NM_001258885|Sam-S|chr2L|+	0.03	0.07	0.04
NM_164617|Cg25C|chr2L|+	0.95	1	0.05
NM_137760|CG10306|chr2R|+	0.95	1	0.05
NM_136115|fon|chr2L|-	0.05	0.1	0.05
NM_140812|CG3902|chr3L|-	0.95	1	0.05
NM_167476|CG9172|chrX|-	0.95	1	0.05
NM_001170211|CG6439|chr3R|-	0.95	1	0.05
NM_001038810|porin|chr2L|-	0.55	0.6	0.05
NM_143102|RpS27|chr3R|-	0.5	0.55	0.05
NM_138019|Gadd34|chr2R|-	0.95	1	0.05
NM_137995|ytr|chr2R|-	0.93	0.98	0.05
NM_170474|Mlc2|chr3R|-	0.05	0.11	0.06
NM_167266|Hsp60|chrX|+	0.94	1	0.06
NM_167150|Trxr-1|chrX|+	0.94	1	0.06
NM_001258803|wupA|chrX|-	0.48	0.54	0.06
NM_132922|CG4653|chrX|+	0.94	1	0.06
NM_001260335|ATPsyn-Cf6|chr3R|-	0.56	0.62	0.06
NM_170266|Ald|chr3R|-	0.51	0.57	0.06
NM_001275299|CG11131|chr3L|+	0.92	0.98	0.06
NM_168292|Prm|chr3L|-	0.72	0.78	0.06
NM_001274335|Cct1|chr3L|+	0.94	1	0.06
NM_001275861|Atpalpha|chr3R|+	0.13	0.19	0.06
NM_141972|CG5999|chr3R|-	0.83	0.89	0.06
NM_168307|Galk|chr3L|-	0.03	0.09	0.06
NM_001272370|ogre|chrX|-	0.93	0.99	0.06
NM_166033|CG18324|chr2R|+	0.94	1	0.06
NM_136617|CG8788|chr2R|+	0.94	1	0.06
NM_079847|Mlc2|chr3R|-	0.05	0.12	0.07
NM_079592|RpL3|chr3R|+	0.52	0.59	0.07
NM_001258800|scu|chrX|+	0.93	1	0.07
NM_078672|scu|chrX|+	0.93	1	0.07
NM_001169662|CG3884|chr2R|-	0.93	1	0.07
NM_001272573|REG|chrX|+	0.93	1	0.07
NM_144186|CG13315|chr3L|+	0.42	0.49	0.07
NM_057828|Cyt-c-p|chr2L|+	0.77	0.84	0.07
NM_166912|arm|chrX|-	0.93	1	0.07
[truncated: 1,006 more rows]

## Sheet: Smn
Supplemental Table S7: Significant mRNA length differences in SmnX7/D mutants.
<2-fold					>2-fold Shortened					>2-fold Lengthened
	Mean_PDUI		PDUI			Mean_PDUI		PDUI			Mean_PDUI		PDUI
Gene	OregonR	Smn	Group_diff		Gene	OregonR	Smn	Group_diff		Gene	OregonR	Smn	Group_diff
NM_165314|fbp|chr2L|-	1	0.51	-0.49		NM_134928|CG9662|chr2L|-	1	0.15	-0.85		NM_139652|CG7465|chr3L|+	0.5	1	0.5
NM_167552|CG4928|chrX|+	1	0.51	-0.49		NM_001202200|CG33255|chr3L|+	1	0.24	-0.76		NM_138760|dmGlut|chr2L|+	0.5	1	0.5
NM_135866|l(2)34Fc|chr2L|-	0.89	0.4	-0.49		NM_001170286|larp|chr3R|-	1	0.26	-0.74		NM_137505|CG5335|chr2R|+	0.5	1	0.5
NM_132711|CG1368|chrX|+	0.95	0.46	-0.49		NM_140161|Cpr67Fa1|chr3L|+	1	0.27	-0.73		NM_165834|CG7777|chr2R|+	0.5	1	0.5
NM_001042906|CG34136|chr2L|+	0.65	0.16	-0.49		NM_169276|Fps85D|chr3R|-	0.98	0.3	-0.68		NM_167358|IP3K2|chrX|+	0.5	1	0.5
NM_141651|CG9393|chr3R|-	0.76	0.27	-0.49		NM_143627|CG11563|chr3R|+	0.93	0.26	-0.67		NM_139444|CG9018|chr3L|-	0.49	1	0.51
NM_135420|CG13101|chr2L|-	1	0.51	-0.49		NM_001104040|CG10625|chr3L|-	0.99	0.35	-0.64		NM_001274523|CG5537|chr3L|+	0.47	1	0.53
NM_001260365|CG43273|chr3R|+	0.79	0.3	-0.49		NM_132527|CG10347|chrX|-	0.83	0.19	-0.64		NM_001169656|Cpr49Ac|chr2R|+	0.34	0.87	0.53
NM_136572|CG13751|chr2R|+	1	0.52	-0.48		NM_135296|CG13796|chr2L|-	0.87	0.24	-0.63		NM_141037|CG9391|chr3L|-	0.46	1	0.54
NM_140185|CG14143|chr3L|+	1	0.52	-0.48		NM_206108|CG33470|chr2R|+	0.93	0.32	-0.61		NM_079194|Akh|chr3L|+	0.42	1	0.58
NM_135218|Galt|chr2L|-	0.84	0.36	-0.48		NM_206518|Pk92B|chr3R|+	0.94	0.33	-0.61		NM_001260447|Npc2h|chr3R|-	0.29	0.89	0.6
NM_001273993|CG33671|chr2R|-	1	0.52	-0.48		NM_057741|Pk92B|chr3R|+	0.94	0.33	-0.61		NM_166065|Rpn6|chr2R|-	0.38	1	0.62
NM_001032241|CG33671|chr2R|-	1	0.52	-0.48		NM_170463|spn-A|chr3R|-	1	0.39	-0.61		NM_138060|CG3376|chr2R|+	0.38	1	0.62
NM_001273772|CG17883|chr2R|+	0.72	0.24	-0.48		NM_137717|Lapsyn|chr2R|+	1	0.4	-0.6		NM_080522|bel|chr3R|-	0.37	1	0.63
NM_140581|IntS9|chr3L|-	1	0.52	-0.48		NM_167310|CG10347|chrX|-	0.74	0.14	-0.6		NM_001273086|CG3714|chr2L|-	0.07	0.71	0.64
NM_001032272|CG33785|chr2R|-	0.86	0.38	-0.48		NM_001274415|CG43444|chr3L|-	1	0.4	-0.6		NM_136001|CG5131|chr2L|+	0.26	0.94	0.68
NM_001170148|Tm1|chr3R|+	0.79	0.32	-0.47		NM_167687|Nup205|chrX|+	0.95	0.35	-0.6		NM_132526|p24-1|chrX|-	0.17	0.96	0.79
NM_135632|CG16743|chr2L|+	1	0.53	-0.47		NM_001201882|CG15282|chr2L|+	0.73	0.14	-0.59		NM_140443|CG13482|chr3L|+	0.14	1	0.86
NM_144354|SF2|chr3R|-	0.93	0.46	-0.47		NM_166156|mrj|chr2R|-	0.9	0.31	-0.59		NM_001169813|CG42568|chr2R|-	0.09	1	0.91
NM_136726|CAP|chr2R|+	1	0.53	-0.47		NM_132936|CG4768|chrX|+	1	0.41	-0.59		NM_168723|CG6479|chr3L|-	0.05	1	0.95
NM_130656|Seipin|chrX|+	1	0.53	-0.47		NM_079734|cenB1A|chr3R|+	0.99	0.4	-0.59		NM_134574|CG1304|chrX|-	0.02	1	0.98
NM_001042983|CG17883|chr2R|+	0.71	0.24	-0.47		NM_165494|coro|chr2R|-	0.8	0.22	-0.58
NM_132889|CG9917|chrX|-	0.9	0.43	-0.47		NM_139770|loj|chr3L|+	0.74	0.16	-0.58
NM_142000|pic|chr3R|+	0.77	0.3	-0.47		NM_134678|CG11885|chr2L|-	0.99	0.41	-0.58
NM_143099|CG10420|chr3R|-	0.91	0.44	-0.47		NM_145882|CG30148|chr2R|-	0.83	0.25	-0.58
NM_139651|CG11349|chr3L|+	1	0.53	-0.47		NM_142960|CG5463|chr3R|-	0.77	0.19	-0.58
NM_142446|CG7142|chr3R|-	0.98	0.51	-0.47		NM_079079|Acox57D-d|chr2R|+	0.77	0.2	-0.57
NM_143532|CG15536|chr3R|-	0.92	0.45	-0.47		NM_080048|L|chr2R|+	0.93	0.36	-0.57
NM_166426|CG4050|chr2R|-	0.96	0.49	-0.47		NM_166289|slim|chr2R|+	0.88	0.31	-0.57
NM_001275196|CG3634|chr3L|-	0.96	0.49	-0.47		NM_137979|CG13560|chr2R|+	0.97	0.41	-0.56
NM_001144711|CG34408|chrX|+	0.64	0.17	-0.47		NM_001273095|l(2)k05819|chr2L|+	0.72	0.16	-0.56
NM_141972|CG5999|chr3R|-	0.82	0.36	-0.46		NM_142592|CG4462|chr3R|-	0.74	0.18	-0.56
NM_140726|CG7603|chr3L|+	0.88	0.42	-0.46		NM_057594|cact|chr2L|-	0.82	0.27	-0.55
NM_001273660|Tep4|chr2L|+	0.89	0.43	-0.46		NM_001169624|Pkn|chr2R|-	0.85	0.3	-0.55
NM_176585|janA|chr3R|-	0.56	0.1	-0.46		NM_166403|CG9945|chr2R|+	0.99	0.44	-0.55
NM_130678|CG14419|chrX|-	1	0.54	-0.46		NM_144290|CG12643|chrX|-	1	0.46	-0.54
NM_130493|CG13365|chrX|-	1	0.54	-0.46		NM_080496|mtSSB|chr3R|-	0.7	0.16	-0.54
NM_057711|bcn92|chrX|-	0.62	0.16	-0.46		NM_001260429|CG7582|chr3R|-	0.83	0.29	-0.54
NM_001103680|CG34163|chr2L|+	0.69	0.23	-0.46		NM_001103696|CG34168|chr2L|-	0.68	0.14	-0.54
NM_001273471|CG34163|chr2L|+	0.69	0.23	-0.46		NM_001274414|CG43444|chr3L|-	1	0.46	-0.54
NM_001272695|CG9784|chrX|-	0.96	0.5	-0.46		NM_143796|Vps28|chr2R|-	1	0.47	-0.53
NM_134988|CG15432|chr2L|+	0.85	0.39	-0.46		NM_001273956|Vhl|chr2R|+	1	0.47	-0.53
NM_001274091|Asph|chr2R|+	0.83	0.37	-0.46		NM_168663|CG4729|chr3L|-	0.85	0.33	-0.52
NM_001259797|CG43064|chr3L|-	0.96	0.5	-0.46		NM_167994|CG32280|chr3L|+	0.83	0.31	-0.52
NM_132385|CG34408|chrX|+	0.62	0.16	-0.46		NM_130690|CG3603|chrX|+	0.85	0.33	-0.52
NM_166855|RpL36|chrX|-	0.75	0.3	-0.45		NM_137811|CG3264|chr2R|-	1	0.48	-0.52
NM_135858|CG15293|chr2L|-	0.98	0.53	-0.45		NM_001272653|sd|chrX|+	1	0.48	-0.52
NM_140794|Chmp1|chr3L|-	0.92	0.47	-0.45		NM_136843|Egm|chr2R|-	1	0.48	-0.52
NM_135378|l(2)k12914|chr2L|-	0.89	0.44	-0.45		NM_141205|CG14646|chr3R|+	1	0.48	-0.52
NM_139936|CG13678|chr3L|+	1	0.55	-0.45		NM_001275149|Mi-2|chr3L|-	0.79	0.27	-0.52
NM_143538|aralar1|chr3R|-	1	0.55	-0.45		NM_143493|Cog7|chr3R|-	1	0.48	-0.52
NM_166910|Pex5|chrX|-	0.98	0.53	-0.45		NM_001273608|RpS26|chr2L|-	0.76	0.24	-0.52
NM_135999|CG5110|chr2L|+	0.93	0.48	-0.45		NM_169295|Kap-alpha3|chr3R|-	1	0.49	-0.51
NM_169226|mRpS18A|chr3R|-	0.77	0.32	-0.45		NM_001104347|CG34278|chr3R|+	0.74	0.23	-0.51
NM_165425|d4|chr2R|+	1	0.55	-0.45		NM_001273213|Galt|chr2L|-	0.89	0.38	-0.51
NM_001042979|p120ctn|chr2R|+	0.83	0.38	-0.45		NM_141648|CG8199|chr3R|+	0.92	0.41	-0.51
NM_168315|Tequila|chr3L|+	1	0.55	-0.45		NM_134885|CG8814|chr2L|+	0.8	0.29	-0.51
NM_138235|CG13912|chr3L|+	1	0.55	-0.45		NM_079885|Pur-alpha|chr4|+	0.92	0.41	-0.51
NM_139575|CG12006|chr3L|+	1	0.55	-0.45		NM_141660|bocksbeutel|chr3R|-	1	0.49	-0.51
NM_001014538|CG10737|chr2R|+	0.53	0.08	-0.45		NM_136483|CG12822|chr2R|+	0.89	0.38	-0.51
NM_001274821|thoc6|chr3L|-	1	0.55	-0.45		NM_136550|CG8736|chr2R|-	1	0.49	-0.51
NM_080247|Vhl|chr2R|+	0.98	0.53	-0.45		NM_141219|Fip1|chr3R|+	0.8	0.29	-0.51
NM_136237|CG9265|chr2L|-	1	0.55	-0.45		NM_001202084|CG13877|chr3L|+	0.86	0.35	-0.51
NM_169214|CG31464|chr3R|+	0.71	0.26	-0.45		NM_138170|CG13877|chr3L|+	0.87	0.36	-0.51
NM_165663|ltd|chr2R|-	0.7	0.25	-0.45		NM_080244|Peritrophin-15a|chr2L|-	0.72	0.22	-0.5
NM_140688|CG7728|chr3L|+	0.95	0.5	-0.45		NM_137441|Muc55B|chr2R|-	1	0.5	-0.5
NM_001273220|GRHR|chr2L|-	0.73	0.28	-0.45		NM_143711|Ref1|chr3R|-	0.79	0.29	-0.5
NM_001260349|CG18428|chr3R|+	0.87	0.42	-0.45		NM_164317|aux|chr3R|+	1	0.5	-0.5
NM_079398|TpnC73F|chr3L|+	0.78	0.34	-0.44		NM_134484|CG14210|chrX|+	0.68	0.18	-0.5
NM_001144563|CG42394|chr3R|+	0.71	0.27	-0.44		NM_138121|Eps-15|chr2R|-	0.9	0.4	-0.5
NM_167941|CG1275|chr3L|-	0.76	0.32	-0.44		NM_133166|imd|chr2R|-	0.66	0.16	-0.5
NM_001272257|mRpL14|chrX|-	1	0.56	-0.44		NM_135512|CG4901|chr2L|+	1	0.5	-0.5
NM_001031982|CG33722|chr3R|+	1	0.56	-0.44		NM_165525|CG11141|chr2R|-	0.88	0.38	-0.5
NM_001169291|sd|chrX|+	1	0.56	-0.44
NM_001275416|alpha-Est2|chr3R|+	0.84	0.4	-0.44
NM_139800|CG8549|chr3L|+	0.79	0.35	-0.44
NM_079854|mRpS18C|chr3R|+	0.87	0.43	-0.44
NM_141638|GstZ2|chr3R|-	1	0.56	-0.44
NM_206269|CG12006|chr3L|+	0.94	0.5	-0.44
NM_138052|CG3356|chr2R|+	0.85	0.41	-0.44
NM_166593|CG30413|chr2R|-	0.82	0.38	-0.44
NM_206228|trio|chr3L|-	0.82	0.38	-0.44
NM_080370|ltd|chr2R|-	0.7	0.26	-0.44
NM_057814|lic|chrX|+	0.72	0.28	-0.44
NM_139367|Pex10|chr3L|+	0.73	0.29	-0.44
NM_176133|lola|chr2R|-	0.87	0.43	-0.44
NM_001275197|CG3680|chr3L|+	0.83	0.39	-0.44
NM_001258481|CG31998|chr4|-	0.76	0.32	-0.44
NM_169235|CG8112|chr3R|+	0.97	0.53	-0.44
NM_136175|vls|chr2L|-	0.68	0.24	-0.44
NM_134935|Cog3|chr2L|-	0.81	0.37	-0.44
NM_167805|CG16940|chr3L|+	0.81	0.37	-0.44
NM_142734|CG6656|chr3R|+	0.63	0.19	-0.44
NM_080165|betaTry|chr2R|+	0.78	0.35	-0.43
NM_131995|CG15784|chrX|+	0.99	0.56	-0.43
NM_143244|CG6403|chr3R|-	0.74	0.31	-0.43
NM_166594|Rpi|chr2R|+	1	0.57	-0.43
NM_079244|Arp3|chr3L|-	1	0.57	-0.43
NM_001038751|Vago|chrX|+	0.92	0.49	-0.43
NM_130593|Pex5|chrX|-	1	0.57	-0.43
NM_135969|mdy|chr2L|+	0.55	0.12	-0.43
NM_140249|CG14131|chr3L|+	1	0.57	-0.43
NM_001274422|prominin-like|chr3L|-	0.99	0.56	-0.43
NM_165939|CG42708|chr2R|-	0.72	0.29	-0.43
NM_001274506|CG4603|chr3L|+	0.87	0.44	-0.43
NM_001272694|CG9784|chrX|-	1	0.57	-0.43
NM_001169907|CG42445|chr3L|-	1	0.57	-0.43
NM_135444|FucTB|chr2L|-	0.86	0.43	-0.43
NM_001274328|CG12084|chr3L|-	0.86	0.43	-0.43
NM_001272532|Tango10|chrX|+	0.86	0.43	-0.43
NM_132515|Tango10|chrX|+	0.86	0.43	-0.43
NM_001201872|CG42711|chr2L|-	0.71	0.28	-0.43
NM_168271|Jon66Ci|chr3L|+	1	0.58	-0.42
NM_001202130|akirin|chr3L|+	1	0.58	-0.42
NM_132186|CG10932|chrX|-	0.83	0.41	-0.42
NM_141581|CG9837|chr3R|-	0.96	0.54	-0.42
NM_140319|CG10616|chr3L|+	1	0.58	-0.42
NM_001169772|CG42496|chr2R|+	0.58	0.16	-0.42
NM_058103|Pfrx|chrX|+	0.95	0.53	-0.42
NM_079376|mRpS31|chr3L|+	0.87	0.45	-0.42
NM_141571|CG8223|chr3R|+	0.83	0.41	-0.42
NM_079135|emp|chr2R|-	0.88	0.46	-0.42
NM_139527|CG14966|chr3L|-	0.9	0.48	-0.42
NM_135656|Ppt2|chr2L|+	0.65	0.23	-0.42
NM_079661|CREG|chr3R|-	0.58	0.16	-0.42
NM_001275979|Orct|chr3R|+	0.96	0.54	-0.42
NM_057277|Mal-A2|chr2R|+	0.51	0.09	-0.42
NM_001272877|Tbc1d15-17|chr2L|+	1	0.58	-0.42
NM_169877|CG4662|chr3R|+	0.94	0.52	-0.42
NM_135116|CG7239|chr2L|+	0.95	0.53	-0.42
NM_134700|KH1|chr2L|+	1	0.58	-0.42
NM_001104254|CG8176|chr3R|+	0.73	0.31	-0.42
NM_135087|CG7371|chr2L|-	1	0.58	-0.42
NM_136412|pgant3|chr2R|-	0.69	0.27	-0.42
NM_144095|Nplp4|chr2L|+	1	0.59	-0.41
NM_144004|CG3348|chr3R|-	0.9	0.49	-0.41
NM_136566|PGRP-SC2|chr2R|+	0.96	0.55	-0.41
NM_144101|CG5011|chr2L|+	0.55	0.14	-0.41
NM_135299|CG7203|chr2L|-	0.99	0.58	-0.41
NM_137660|CG16799|chr2R|-	0.52	0.11	-0.41
NM_141354|Gasp|chr3R|-	0.85	0.44	-0.41
NM_136718|CG12214|chr2R|-	1	0.59	-0.41
NM_143679|MED26|chr4|-	1	0.59	-0.41
NM_143771|kermit|chr2R|-	0.85	0.44	-0.41
NM_079907|ras|chrX|+	1	0.59	-0.41
NM_001144650|Doa|chr3R|+	1	0.59	-0.41
NM_134917|CG15406|chr2L|+	0.72	0.31	-0.41
NM_001275632|140up|chr3R|-	1	0.59	-0.41
NM_001170202|CG5919|chr3R|+	0.85	0.44	-0.41
NM_165814|CG9062|chr2R|-	1	0.59	-0.41
NM_139908|CG8042|chr3L|-	0.7	0.29	-0.41
NM_079458|Ide|chr3L|-	0.63	0.22	-0.41
NM_137344|CG30456|chr2R|+	0.59	0.18	-0.41
NM_135761|DnaJ-H|chr2L|-	0.84	0.43	-0.41
NM_166204|CG6665|chr2R|+	0.94	0.53	-0.41
NM_057433|usp|chrX|-	0.88	0.47	-0.41
NM_137327|CG6665|chr2R|+	0.93	0.52	-0.41
NM_136074|CG10428|chr2L|+	1	0.59	-0.41
NM_169801|tatl|chr3R|+	1	0.59	-0.41
NM_132483|CG1737|chrX|+	1	0.59	-0.41
NM_001170186|CG4662|chr3R|+	0.65	0.24	-0.41
NM_170451|Jon99Ciii|chr3R|+	1	0.6	-0.4
NM_166293|Pepck|chr2R|+	1	0.6	-0.4
NM_058037|Int6|chr3L|-	1	0.6	-0.4
NM_057577|Sod2|chr2R|-	0.75	0.35	-0.4
NM_137816|CG5819|chr2R|+	1	0.6	-0.4
NM_137477|Idgf5|chr2R|+	0.74	0.34	-0.4
NM_176008|CG4658|chr2L|+	0.79	0.39	-0.4
NM_139691|CG10673|chr3L|-	0.96	0.56	-0.4
NM_001043109|CG34140|chr3L|-	0.97	0.57	-0.4
NM_164503|daw|chr2L|+	0.56	0.16	-0.4
NM_001272498|ras|chrX|+	0.99	0.59	-0.4
NM_136486|CG12159|chr2R|-	0.9	0.5	-0.4
NM_001202209|CG42833|chr3L|+	0.88	0.48	-0.4
NM_135216|CG11070|chr2L|+	1	0.6	-0.4
NM_001273098|CG15432|chr2L|+	0.76	0.36	-0.4
NM_166456|MESK2|chr2R|+	0.58	0.18	-0.4
NM_001144317|CG43773|chr2L|+	0.94	0.54	-0.4
NM_140994|Pitslre|chr3L|+	0.69	0.29	-0.4
NM_057519|Gprk2|chr3R|+	1	0.6	-0.4
NM_001170081|CG42489|chr3R|-	0.57	0.17	-0.4
NM_169693|Hel89B|chr3R|+	0.9	0.5	-0.4
NM_001103557|CG7378|chrX|+	0.63	0.23	-0.4
NM_139505|Sk2|chr3L|+	0.89	0.49	-0.4
NM_135151|CG9175|chr2L|-	0.76	0.36	-0.4
NM_141592|CAHbeta|chr3R|+	0.93	0.53	-0.4
NM_136090|Ttc19|chr2L|-	0.69	0.29	-0.4
NM_080094|dom|chr2R|+	0.9	0.5	-0.4
NM_141689|RpS29|chr3R|+	0.86	0.47	-0.39
NM_133137|Muc18B|chrX|+	0.89	0.5	-0.39
NM_130694|CG14265|chrX|-	0.77	0.38	-0.39
NM_175942|CG33127|chr2L|+	0.91	0.52	-0.39
NM_001103901|l(2)03709|chr2R|+	0.95	0.56	-0.39
NM_132208|CG2254|chrX|-	0.63	0.24	-0.39
NM_141032|CG10512|chr3L|+	0.67	0.28	-0.39
NM_057874|Surf4|chr3R|-	0.59	0.2	-0.39
NM_001274987|th|chr3L|-	0.86	0.47	-0.39
NM_176684|CG2930|chrX|+	0.88	0.49	-0.39
NM_058125|Rpt1|chr2R|-	0.82	0.43	-0.39
NM_001169876|CG15012|chr3L|-	0.67	0.28	-0.39
NM_001273392|CG5384|chr2L|-	0.63	0.24	-0.39
NM_144443|CG18858|chr2L|-	0.56	0.17	-0.39
NM_001103633|CG34310|chr2L|+	0.67	0.28	-0.39
NM_140281|Pop2|chr3L|-	0.45	0.06	-0.39
NM_142525|Cyp12a5|chr3R|+	1	0.61	-0.39
NM_136325|CG10417|chr2R|-	0.9	0.51	-0.39
NM_137178|mRpL41|chr2R|-	1	0.61	-0.39
NM_143365|Noa36|chr3R|-	0.85	0.46	-0.39
NM_167427|opm|chrX|-	1	0.61	-0.39
NM_001273924|CG12214|chr2R|-	1	0.61	-0.39
NM_001259682|CG14989|chr3L|+	0.8	0.41	-0.39
NM_080527|drm|chr2L|+	1	0.61	-0.39
NM_167656|Pfrx|chrX|+	0.92	0.53	-0.39
NM_167652|Pfrx|chrX|+	0.93	0.54	-0.39
NM_001258821|Pfrx|chrX|+	0.93	0.54	-0.39
NM_001272676|CG9917|chrX|-	0.75	0.36	-0.39
NM_137822|CG13506|chr2R|+	0.92	0.53	-0.39
NM_001144634|CG5746|chr3R|-	0.97	0.58	-0.39
NM_001260302|CG31431|chr3R|+	0.86	0.47	-0.39
NM_132897|CG4301|chrX|+	0.77	0.38	-0.39
NM_001260303|CG31431|chr3R|+	0.86	0.47	-0.39
NM_169756|CREG|chr3R|-	0.5	0.11	-0.39
NM_001202236|CG14646|chr3R|+	0.91	0.52	-0.39
NM_133086|CG6540|chrX|+	0.88	0.49	-0.39
NM_166390|CG8929|chr2R|+	0.84	0.45	-0.39
NM_141178|CG12581|chr3R|+	0.79	0.4	-0.39
NM_141480|CG2641|chr3R|+	0.81	0.42	-0.39
NM_141003|CG3634|chr3L|-	0.99	0.6	-0.39
NM_141958|CG18616|chr3R|+	0.71	0.32	-0.39
NM_144001|CG6503|chr3R|-	0.57	0.18	-0.39
NM_079050|RpL18A|chr2R|-	0.82	0.44	-0.38
NM_137242|Got1|chr2R|+	1	0.62	-0.38
NM_143199|Dak1|chr3R|-	0.98	0.6	-0.38
NM_167152|ND75|chrX|-	0.66	0.28	-0.38
NM_079543|alpha-Est3|chr3R|-	1	0.62	-0.38
NM_001274120|CG4802|chr2R|+	0.51	0.13	-0.38
NM_001273915|Jra|chr2R|+	1	0.62	-0.38
NM_132577|CG2556|chrX|+	0.89	0.51	-0.38
NM_078809|me31B|chr2L|+	0.63	0.25	-0.38
NM_165919|Galpha49B|chr2R|+	1	0.62	-0.38
NM_142274|CG6901|chr3R|+	1	0.62	-0.38
NM_132766|opm|chrX|-	0.97	0.59	-0.38
NM_058130|Sps2|chr2L|+	0.74	0.36	-0.38
NM_142325|CG3534|chr3R|+	0.61	0.23	-0.38
NM_001201991|CG42808|chr2R|-	1	0.62	-0.38
NM_001031907|Rpp20|chrX|+	1	0.62	-0.38
NM_001104173|fz2|chr3L|-	0.98	0.6	-0.38
NM_001260471|krz|chr3R|-	0.96	0.58	-0.38
NM_001169675|CG6145|chr2R|-	0.76	0.38	-0.38
NM_001144699|CG42308|chrX|+	0.85	0.47	-0.38
NM_001273068|CG9662|chr2L|-	0.51	0.13	-0.38
NM_079675|dnk|chr3R|+	0.74	0.36	-0.38
NM_164512|CG31950|chr2L|+	0.66	0.28	-0.38
NM_142188|CG6276|chr3R|-	0.81	0.43	-0.38
NM_001042863|CG7337|chr2L|+	0.86	0.48	-0.38
NM_168472|Bmcp|chr3L|+	0.76	0.38	-0.38
NM_139724|Eaf6|chr3L|-	0.46	0.08	-0.38
NM_136349|dream|chr2R|-	0.64	0.26	-0.38
NM_176345|CG33052|chr3L|-	0.61	0.23	-0.38
NM_001274572|RpL18|chr3L|-	0.72	0.35	-0.37
NM_135037|Jon25Biii|chr2L|-	0.89	0.52	-0.37
NM_079570|Fst|chr3R|-	0.86	0.49	-0.37
NM_169965|CG31233|chr3R|+	0.95	0.58	-0.37
NM_001272644|Ahcy13|chrX|+	1	0.63	-0.37
NM_142546|CG18493|chr3R|+	0.84	0.47	-0.37
NM_136894|CG8860|chr2R|-	1	0.63	-0.37
NM_001275220|CG11309|chr3L|-	1	0.63	-0.37
NM_169810|Vha100-2|chr3R|-	0.78	0.41	-0.37
NM_079017|Hsc70-5|chr2R|-	0.97	0.6	-0.37
NM_001202085|CG42846|chr3L|-	0.81	0.44	-0.37
NM_142030|CG9796|chr3R|-	0.95	0.58	-0.37
NM_001202182|CG42728|chr3L|-	1	0.63	-0.37
NM_142346|CG5246|chr3R|+	0.99	0.62	-0.37
NM_135533|CG5384|chr2L|-	0.66	0.29	-0.37
NM_001103634|CG34310|chr2L|+	0.61	0.24	-0.37
NM_080381|Nop60B|chr2R|+	0.7	0.33	-0.37
NM_167839|CG32483|chr3L|-	0.7	0.33	-0.37
NM_165687|CG30339|chr2R|-	0.75	0.38	-0.37
NM_141417|CG1315|chr3R|-	0.88	0.51	-0.37
NM_131932|CG2982|chrX|+	1	0.63	-0.37
NM_206468|GstZ2|chr3R|-	1	0.63	-0.37
NM_079560|mRpL19|chr3R|+	0.93	0.56	-0.37
NM_001144351|CG32971|chr2L|+	1	0.63	-0.37
NM_001272623|Flo-2|chrX|+	0.64	0.27	-0.37
NM_132771|CG15027|chrX|-	0.93	0.56	-0.37
NM_001043009|l(2)01289|chr2R|-	1	0.63	-0.37
NM_135547|CG5056|chr2L|+	0.9	0.53	-0.37
NM_135973|CG6012|chr2L|-	1	0.63	-0.37
NM_001144350|CG31855|chr2L|+	0.61	0.24	-0.37
NM_169338|sle|chr3R|+	0.87	0.5	-0.37
NM_136052|CG10383|chr2L|-	0.95	0.58	-0.37
NM_133001|CG8289|chrX|-	0.71	0.34	-0.37
NM_134989|morgue|chr2L|-	1	0.63	-0.37
NM_057579|Dbp45A|chr2R|+	0.6	0.23	-0.37
NM_136915|CG13163|chr2R|+	0.92	0.55	-0.37
NM_132052|CG12728|chrX|+	0.78	0.41	-0.37
NM_001275449|CG42489|chr3R|-	0.73	0.36	-0.37
NM_001042862|CG7337|chr2L|+	0.85	0.48	-0.37
NM_206529|Mvl|chr3R|-	0.7	0.33	-0.37
NM_079275|Hsp23|chr3L|+	1	0.64	-0.36
NM_080275|nol|chr3L|+	1	0.64	-0.36
NM_078863|Mhc|chr2L|+	0.98	0.62	-0.36
NM_079519|Rm62|chr3R|-	0.98	0.62	-0.36
NM_001202253|Rm62|chr3R|-	0.98	0.62	-0.36
NM_079831|Jon99Ci|chr3R|-	0.7	0.34	-0.36
NM_136640|CG8801|chr2R|-	0.93	0.57	-0.36
NM_168306|pix|chr3L|-	0.81	0.45	-0.36
NM_137485|GstE7|chr2R|+	1	0.64	-0.36
NM_079767|Ela|chr3R|+	1	0.64	-0.36
NM_137994|CG5554|chr2R|+	0.62	0.26	-0.36
NM_001144417|CG10625|chr3L|-	0.66	0.3	-0.36
NM_142415|DNaseII|chr3R|+	0.84	0.48	-0.36
NM_139906|Srp9|chr3L|+	0.61	0.25	-0.36
NM_001259223|l(2)01289|chr2R|-	1	0.64	-0.36
NM_001272270|CG3603|chrX|+	0.77	0.41	-0.36
NM_166956|CG3588|chrX|+	0.86	0.5	-0.36
NM_001275028|CG32164|chr3L|+	0.82	0.46	-0.36
NM_139690|CHMP2B|chr3L|+	0.9	0.54	-0.36
NM_138269|cue|chr3L|-	0.87	0.51	-0.36
NM_142060|CG9286|chr3R|+	0.97	0.61	-0.36
NR_073686|CR43767|chr2L|-	0.94	0.58	-0.36
NM_175954|CG33123|chr2L|-	1	0.64	-0.36
NM_166703|emp|chr2R|-	0.85	0.49	-0.36
NM_001201829|jp|chr2L|-	1	0.64	-0.36
NM_079337|Gl|chr3L|+	1	0.64	-0.36
NM_001273802|CG9410|chr2R|+	0.92	0.56	-0.36
NM_142683|CG7044|chr3R|-	1	0.64	-0.36
NM_136435|fa2h|chr2R|-	0.96	0.6	-0.36
NM_079873|faf|chr3R|+	0.62	0.26	-0.36
NM_058093|CHIP|chr2L|+	0.67	0.31	-0.36
NM_135801|CG9302|chr2L|-	0.5	0.14	-0.36
NM_169816|fru|chr3R|-	0.96	0.6	-0.36
NM_135650|RfC38|chr2L|-	0.95	0.59	-0.36
NM_001202176|CG6833|chr3L|+	1	0.64	-0.36
NM_143519|CG1983|chr3R|-	0.8	0.44	-0.36
NM_079581|TfIIFbeta|chr3R|-	0.65	0.29	-0.36
NM_001273535|l(2)35Cc|chr2L|+	0.82	0.46	-0.36
NM_139888|PGRP-SD|chr3L|+	0.73	0.37	-0.36
NM_139397|CG18173|chr3L|-	0.67	0.31	-0.36
NM_001274230|TM4SF|chr2R|+	0.6	0.24	-0.36
NM_132127|CG4542|chrX|+	0.69	0.33	-0.36
NM_137849|RpS24|chr2R|-	1	0.65	-0.35
NM_142224|CG5399|chr3R|+	0.76	0.41	-0.35
NM_079112|Adk2|chr2R|+	0.61	0.26	-0.35
NM_141915|CG17738|chr3R|+	0.52	0.17	-0.35
NM_165577|CG2915|chr2R|-	1	0.65	-0.35
NM_143728|CG14630|chrX|+	0.96	0.61	-0.35
NM_079277|aay|chr3L|+	0.92	0.57	-0.35
NM_078720|Spp|chr2L|-	0.51	0.16	-0.35
NM_135205|Ent2|chr2L|+	1	0.65	-0.35
NM_001275018|TMS1|chr3L|+	0.48	0.13	-0.35
NM_168501|CG10638|chr3L|-	0.57	0.22	-0.35
NM_142951|CG5991|chr3R|+	1	0.65	-0.35
NM_079020|Dro|chr2R|+	0.53	0.18	-0.35
NM_080309|mRpL14|chrX|-	1	0.65	-0.35
NM_001103909|CG34198|chr2R|-	0.99	0.64	-0.35
NM_078715|l(2)gl|chr2L|-	0.58	0.23	-0.35
NM_133126|CG7556|chrX|-	0.84	0.49	-0.35
NM_001144361|CLIP-190|chr2L|+	0.62	0.27	-0.35
NM_170296|CG6330|chr3R|-	0.62	0.27	-0.35
NM_168094|CG32243|chr3L|-	1	0.65	-0.35
NM_001275395|CG1315|chr3R|-	0.87	0.52	-0.35
NM_058023|Irp-1A|chr3R|-	0.95	0.6	-0.35
NM_165595|CG30373|chr2R|-	0.61	0.26	-0.35
NM_001276042|LpR2|chr3R|-	1	0.65	-0.35
NM_170581|heph|chr3R|-	0.7	0.35	-0.35
NM_001260206|bor|chr3R|-	0.69	0.34	-0.35
NM_001274594|CG7546|chr3L|+	0.98	0.63	-0.35
NM_001274593|CG7546|chr3L|+	0.98	0.63	-0.35
NM_142463|Vha100-4|chr3R|-	0.58	0.23	-0.35
NM_132938|CG4789|chrX|+	0.58	0.23	-0.35
NM_165938|CG42708|chr2R|-	0.53	0.18	-0.35
NM_001169811|Dcp1|chr2R|-	0.92	0.57	-0.35
NM_080359|nAcRbeta-21C|chr2L|+	0.98	0.63	-0.35
NM_143378|CG1523|chr3R|-	0.93	0.58	-0.35
NM_206287|smid|chr3L|+	0.5	0.15	-0.35
NM_134533|CG9578|chrX|+	0.75	0.4	-0.35
NM_138111|CG4806|chr2R|-	0.84	0.49	-0.35
NM_001104146|l(3)72Do|chr3L|+	0.91	0.56	-0.35
NM_001014605|Gnf1|chr3R|+	0.9	0.55	-0.35
NM_169267|CG8121|chr3R|+	0.56	0.21	-0.35
NM_001031902|Shawn|chrX|+	0.74	0.39	-0.35
NM_136988|CG13323|chr2R|-	1	0.66	-0.34
NM_136300|RpL21|chr2L|-	0.67	0.33	-0.34
NM_137435|CG5084|chr2R|+	0.63	0.29	-0.34
NM_001144364|CG17325|chr2L|+	1	0.66	-0.34
NM_135530|CG5390|chr2L|-	0.86	0.52	-0.34
NM_136652|CG1809|chr2R|+	0.68	0.34	-0.34
NM_144417|CG18815|chr3L|+	0.5	0.16	-0.34
NM_057269|LanA|chr3L|-	0.89	0.55	-0.34
NM_170120|CG5991|chr3R|+	0.97	0.63	-0.34
NM_141760|Art1|chr3R|-	0.94	0.6	-0.34
NM_058028|CG4585|chr2R|-	0.96	0.62	-0.34
NM_165581|ACC|chr2R|-	0.68	0.34	-0.34
NM_176698|Inx7|chrX|-	0.81	0.47	-0.34
NM_167942|CG1275|chr3L|-	0.58	0.24	-0.34
NM_135534|CG4972|chr2L|+	0.62	0.28	-0.34
NM_001144294|lectin-22C|chr2L|-	0.94	0.6	-0.34
NM_001042858|CG13865|chrX|+	0.79	0.45	-0.34
NM_142929|CG10208|chr3R|-	0.99	0.65	-0.34
NM_135403|Trs23|chr2L|+	0.79	0.45	-0.34
NM_142809|CG6937|chr3R|+	0.62	0.28	-0.34
NM_001274468|CG14995|chr3L|-	0.83	0.49	-0.34
NM_137047|CG6197|chr2R|+	0.96	0.62	-0.34
NM_141511|CG9667|chr3R|-	0.79	0.45	-0.34
NM_135328|Spn28Dc|chr2L|-	0.85	0.51	-0.34
NM_001273957|CG9062|chr2R|-	0.87	0.53	-0.34
NM_001032244|seq|chr2R|-	0.95	0.61	-0.34
NM_001274631|CG13676|chr3L|-	0.77	0.43	-0.34
NM_079243|nmo|chr3L|+	1	0.66	-0.34
NM_135305|CG7149|chr2L|-	0.88	0.54	-0.34
NM_142436|CG7175|chr3R|-	0.66	0.32	-0.34
NM_001169402|CG12194|chr2L|+	0.39	0.05	-0.34
NM_140674|Lmpt|chr3L|+	0.58	0.24	-0.34
NM_001202383|CG7824|chr3R|-	0.77	0.43	-0.34
NM_001031901|Shawn|chrX|+	0.74	0.4	-0.34
NM_141645|mura|chr3R|-	0.92	0.58	-0.34
NM_166629|Upf3|chr2R|-	0.54	0.2	-0.34
NM_139953|Pex2|chr3L|+	0.67	0.33	-0.34
NM_057481|LysS|chr3L|+	0.81	0.48	-0.33
NM_079987|RpL8|chr3L|+	1	0.67	-0.33
NM_142099|CG3321|chr3R|+	0.87	0.54	-0.33
NM_057780|Nap1|chr2R|-	0.4	0.07	-0.33
NM_138139|Tina-1|chr2R|-	0.62	0.29	-0.33
NM_141624|CG16749|chr3R|-	0.52	0.19	-0.33
NM_001144690|CG3011|chrX|-	1	0.67	-0.33
NM_168120|CG10625|chr3L|-	1	0.67	-0.33
NM_134578|Ntf-2|chrX|+	0.55	0.22	-0.33
NM_132290|CG7267|chrX|-	0.7	0.37	-0.33
NM_078782|Tep2|chr2L|-	1	0.67	-0.33
NM_001104034|DOR|chr3L|+	0.85	0.52	-0.33
NM_001276128|Rpn2|chr3R|+	0.96	0.63	-0.33
NM_166658|CG3209|chr2R|+	0.6	0.27	-0.33
NM_080353|Pros28.1|chrX|+	0.65	0.32	-0.33
NM_168949|Csp|chr3L|+	1	0.67	-0.33
NM_079145|Mtch|chr3L|+	0.72	0.39	-0.33
NM_176424|CG9821|chr3R|-	0.96	0.63	-0.33
NM_001259596|Mtch|chr3L|+	0.67	0.34	-0.33
NM_135563|CG5322|chr2L|-	1	0.67	-0.33
NM_001043269|CG17271|chr3R|-	0.59	0.26	-0.33
NM_140871|CG9231|chr3L|-	0.59	0.26	-0.33
NM_165412|CG3262|chr2L|+	0.93	0.6	-0.33
NM_001202348|CG13607|chr3R|-	1	0.67	-0.33
NM_170121|CG5991|chr3R|+	1	0.67	-0.33
NM_080176|GstD6|chr3R|+	0.95	0.62	-0.33
NM_132440|CG2145|chrX|+	0.6	0.27	-0.33
NR_048372|CR43283|chr3R|-	0.77	0.44	-0.33
NM_136008|CG6870|chr2L|-	0.72	0.39	-0.33
NM_001273801|Adf1|chr2R|+	1	0.67	-0.33
NM_001014648|jar|chr3R|-	0.73	0.4	-0.33
NM_143471|CG7789|chr3R|+	1	0.67	-0.33
NM_079760|Pp1alpha-96A|chr3R|+	0.82	0.49	-0.33
NM_164325|CG1092|chr3R|+	1	0.67	-0.33
NM_139379|metl|chr3L|-	0.95	0.62	-0.33
NM_001259975|CG34112|chr3R|-	0.55	0.22	-0.33
NM_141061|CG7519|chr3L|+	0.87	0.54	-0.33
NM_142496|CG7720|chr3R|-	0.72	0.39	-0.33
NM_001274507|CG4603|chr3L|+	0.74	0.41	-0.33
NM_001272451|CG12118|chrX|-	0.86	0.53	-0.33
NM_001103466|CG15309|chrX|-	0.64	0.31	-0.33
NM_132633|CG4332|chrX|+	1	0.67	-0.33
NM_137998|Dcp1|chr2R|-	0.91	0.58	-0.33
NM_001144485|GXIVsPLA2|chr3L|+	0.91	0.58	-0.33
NM_168059|CG14995|chr3L|-	0.79	0.46	-0.33
NM_142177|Art3|chr3R|-	1	0.67	-0.33
NM_143792|qsm|chr2R|-	0.51	0.18	-0.33
NR_073892|CR43786|chr2R|-	1	0.67	-0.33
NM_001272645|CG6340|chrX|+	0.91	0.58	-0.33
NM_136802|CG13227|chr2R|+	0.81	0.48	-0.33
NM_169286|GstZ2|chr3R|-	0.69	0.36	-0.33
NM_132970|CG5070|chrX|+	0.69	0.36	-0.33
NM_143348|CG4849|chr3R|+	1	0.67	-0.33
NM_169431|ClC-a|chr3R|-	0.52	0.19	-0.33
NM_136323|CG10395|chr2R|+	0.47	0.14	-0.33
NM_167502|Dsp1|chrX|+	0.59	0.26	-0.33
NM_078742|Ptpa|chr2L|+	0.79	0.46	-0.33
NM_079019|RpI1|chr2R|-	0.68	0.35	-0.33
NM_136655|CG1814|chr2R|+	0.7	0.37	-0.33
NM_140288|l(3)j2D3|chr3L|+	0.43	0.1	-0.33
NM_132161|unc-119|chrX|-	0.62	0.29	-0.33
NM_137248|CG8435|chr2R|-	0.7	0.37	-0.33
NM_079178|sty|chr3L|-	0.75	0.42	-0.33
NM_001169712|CG4984|chr2R|+	0.78	0.45	-0.33
NM_001103882|mute|chr2R|-	0.85	0.52	-0.33
NM_001111009|su(f)|chrXHet|+	0.6	0.27	-0.33
NM_078970|deltaTry|chr2R|+	0.85	0.53	-0.32
NM_001273760|RpL21|chr2L|-	0.62	0.3	-0.32
NM_143787|Idh|chr3L|-	0.99	0.67	-0.32
NM_139583|CG10863|chr3L|-	0.41	0.09	-0.32
NM_170556|CycG|chr3R|-	0.86	0.54	-0.32
NM_170557|CycG|chr3R|-	0.86	0.54	-0.32
NM_142266|CG5903|chr3R|-	0.85	0.53	-0.32
NM_080031|Ag5r|chrX|-	0.6	0.28	-0.32
NM_140420|CG9040|chr3L|+	0.85	0.53	-0.32
NM_169528|sqd|chr3R|-	1	0.68	-0.32
NM_001272963|Der-1|chr2L|+	0.99	0.67	-0.32
NM_136003|CG6412|chr2L|-	0.97	0.65	-0.32
NM_168543|flr|chr3L|+	0.81	0.49	-0.32
NM_079024|Cyp6a9|chr2R|-	0.43	0.11	-0.32
NM_001170086|CG9837|chr3R|-	0.9	0.58	-0.32
NM_079207|Srp54k|chr3L|+	0.74	0.42	-0.32
NM_001275363|CG31549|chr3R|+	0.93	0.61	-0.32
NM_135074|Cyp4ac3|chr2L|+	1	0.68	-0.32
NM_079013|mRpS16|chr2R|-	0.55	0.23	-0.32
NM_141294|CG12746|chr3R|+	1	0.68	-0.32
NM_079308|viaf|chr3L|-	0.84	0.52	-0.32
NM_078858|Syx5|chr2L|+	0.74	0.42	-0.32
NM_141401|Neurochondrin|chr3R|+	0.91	0.59	-0.32
NM_001144409|CG10359|chr3L|+	0.89	0.57	-0.32
NM_135724|Oatp33Ea|chr2L|-	0.7	0.38	-0.32
NM_079582|mRpL37|chr3R|-	0.6	0.28	-0.32
NM_168012|CG14968|chr3L|-	0.84	0.52	-0.32
NM_166417|CG30291|chr2R|-	0.69	0.37	-0.32
NM_141095|Rpb8|chr3L|+	0.73	0.41	-0.32
NM_167111|Sxl|chrX|-	0.81	0.49	-0.32
NM_001104476|woc|chr3R|-	0.98	0.66	-0.32
NM_136583|CG8232|chr2R|+	0.78	0.46	-0.32
NM_001144371|CG31688|chr2L|+	1	0.68	-0.32
NM_001104331|CG6171|chr3R|-	0.62	0.3	-0.32
NM_001169683|Inr-a|chr2R|-	0.64	0.32	-0.32
NM_001202303|GATAe|chr3R|+	0.76	0.44	-0.32
NM_001144352|CG32971|chr2L|+	0.85	0.53	-0.32
NM_135359|CG7840|chr2L|+	0.88	0.56	-0.32
NM_079761|Syx18|chr3R|-	0.54	0.22	-0.32
NM_153771|CG8920|chr2R|+	0.69	0.37	-0.32
NM_001169989|Oatp74D|chr3L|+	0.67	0.35	-0.32
NM_001274195|CG10321|chr2R|+	0.93	0.61	-0.32
NM_143298|CG3368|chr3R|+	0.92	0.6	-0.32
NM_057225|hk|chr2L|-	0.55	0.23	-0.32
NM_140028|CG4911|chr3L|-	0.83	0.51	-0.32
NM_001274684|CG4911|chr3L|-	0.83	0.51	-0.32
NM_001274795|Pi3K68D|chr3L|-	0.9	0.58	-0.32
NM_001274121|qkr54B|chr2R|+	0.83	0.51	-0.32
NM_001038944|Deaf1|chr3L|+	0.92	0.6	-0.32
NM_001169448|CG33298|chr2L|+	0.85	0.53	-0.32
NM_132287|CG42388|chrX|+	0.76	0.44	-0.32
NM_143818|Cyp6a22|chr2R|+	0.85	0.53	-0.32
NM_166809|ATPsyn-beta|chr4|+	1	0.69	-0.31
NM_139756|Jon65Aiii|chr3L|+	0.65	0.34	-0.31
NM_080366|Ef2b|chr2L|-	0.97	0.66	-0.31
NM_001104360|CG34282|chr3R|+	0.59	0.28	-0.31
NM_001273496|Vha68-2|chr2L|+	0.51	0.2	-0.31
NM_168207|pst|chr3L|-	1	0.69	-0.31
NM_078754|Trip1|chr2L|-	0.87	0.56	-0.31
NM_132923|CG9672|chrX|-	0.63	0.32	-0.31
NM_001144366|CG42305|chr2L|+	0.42	0.11	-0.31
NM_001144415|CG10625|chr3L|-	1	0.69	-0.31
NM_079663|Prx3|chr3R|-	0.84	0.53	-0.31
NM_144456|GstD10|chr3R|-	0.86	0.55	-0.31
NM_001275019|TMS1|chr3L|+	0.45	0.14	-0.31
NM_001170131|Hrb87F|chr3R|-	0.67	0.36	-0.31
NM_166952|CG32795|chrX|-	0.59	0.28	-0.31
NM_144328|CG10570|chr2L|-	0.64	0.33	-0.31
NM_058154|G-ialpha65A|chr3L|-	1	0.69	-0.31
NM_168204|lark|chr3L|+	0.81	0.5	-0.31
NM_136554|Vps25|chr2R|+	0.81	0.5	-0.31
NM_143308|CG5402|chr3R|-	0.67	0.36	-0.31
NM_001201964|CG8026|chr2R|-	0.65	0.34	-0.31
NM_169364|Rbp1|chr3R|+	1	0.69	-0.31
NM_001170316|heph|chr3R|-	0.58	0.27	-0.31
NM_001258905|CG43348|chr2L|+	0.49	0.18	-0.31
NM_001104168|Sgf11|chr3L|-	0.97	0.66	-0.31
NM_001170319|heph|chr3R|-	0.58	0.27	-0.31
NM_079990|Sara|chr2R|+	0.35	0.04	-0.31
NM_140447|bbg|chr3L|-	0.56	0.25	-0.31
NM_001275077|CG32195|chr3L|+	0.46	0.15	-0.31
NM_080162|mit(1)15|chrX|+	1	0.69	-0.31
NM_169193|Sp7|chr3R|+	0.66	0.35	-0.31
NM_001273650|RanGap|chr2L|+	0.66	0.35	-0.31
NM_132896|CG9981|chrX|-	0.6	0.29	-0.31
NM_137390|CG6484|chr2R|-	0.96	0.65	-0.31
NM_079794|Tl|chr3R|+	1	0.69	-0.31
NM_165058|CG31731|chr2L|+	0.69	0.38	-0.31
NM_136939|Nup54|chr2R|-	0.61	0.3	-0.31
NM_131942|CG3527|chrX|+	0.83	0.52	-0.31
NM_001042857|Rab21|chrX|-	0.74	0.43	-0.31
NM_133098|CG7053|chrX|+	0.82	0.51	-0.31
NM_143412|CG11877|chr3R|+	0.47	0.16	-0.31
NM_136340|gp210|chr2R|+	0.49	0.18	-0.31
NM_142564|Nup58|chr3R|+	0.69	0.38	-0.31
NM_001276155|CG15514|chr3R|-	0.71	0.4	-0.31
NM_143138|Vps33B|chr3R|+	0.79	0.48	-0.31
NM_167406|betaNACtes6|chrX|-	0.64	0.33	-0.31
NM_079220|yip7|chr3L|+	0.62	0.32	-0.3
NM_132754|CG9512|chrX|-	0.94	0.64	-0.3
NM_143321|CG5590|chr3R|+	1	0.7	-0.3
NM_135196|CG9547|chr2L|-	1	0.7	-0.3
NM_058021|TER94|chr2R|+	0.78	0.48	-0.3
NM_166237|CG4847|chr2R|+	1	0.7	-0.3
NM_167559|CG32564|chrX|+	1	0.7	-0.3
NM_141971|CG5724|chr3R|+	0.86	0.56	-0.3
NM_168950|Csp|chr3L|+	1	0.7	-0.3
NM_078813|mRpS7|chr2L|+	0.9	0.6	-0.3
NM_168076|Hexo1|chr3L|+	0.91	0.61	-0.3
NM_001259447|CG5550|chr2R|+	0.41	0.11	-0.3
NM_137302|Picot|chr2R|-	0.63	0.33	-0.3
NM_140194|Plod|chr3L|-	0.64	0.34	-0.3
NM_165796|CG7220|chr2R|+	0.54	0.24	-0.3
NM_001276067|Lerp|chr3R|-	0.79	0.49	-0.3
NM_001272687|Anxb11|chrX|-	0.68	0.38	-0.3
NM_135945|CG5861|chr2L|-	0.63	0.33	-0.3
NM_167943|obst-I|chr3L|+	0.89	0.59	-0.3
NM_134657|CG3436|chr2L|+	0.88	0.58	-0.3
NM_001275858|Synd|chr3R|+	0.6	0.3	-0.3
NM_079266|Dhpr|chr3L|+	0.68	0.38	-0.3
NM_140395|CG10116|chr3L|-	0.85	0.55	-0.3
NM_057825|Reg-5|chr2R|-	1	0.7	-0.3
NM_079625|su(Hw)|chr3R|-	1	0.7	-0.3
NM_001201995|CG6701|chr2R|-	1	0.7	-0.3
NM_143222|CG14237|chr3R|+	0.62	0.32	-0.3
NM_136348|Pngl|chr2R|+	0.63	0.33	-0.3
NM_132906|CG13014|chrX|+	1	0.7	-0.3
NM_134889|CG9643|chr2L|-	1	0.7	-0.3
NM_164339|CG9776|chr3R|-	0.93	0.63	-0.3
NM_001201982|CG8520|chr2R|+	0.49	0.19	-0.3
NM_079016|Mdr50|chr2R|+	0.52	0.22	-0.3
NM_001258826|CoRest|chrX|+	1	0.7	-0.3
NM_001275232|CG7519|chr3L|+	0.87	0.57	-0.3
NM_057983|Lip3|chr3R|-	0.58	0.28	-0.3
NM_132055|CG6067|chrX|+	0.88	0.58	-0.3
NM_001276041|LpR2|chr3R|-	0.67	0.37	-0.3
NM_143201|CG14543|chr3R|+	0.85	0.55	-0.3
NM_001274185|RIC-3|chr2R|+	0.9	0.6	-0.3
NM_001038977|Saf-B|chr3R|+	0.64	0.34	-0.3
NM_170453|Acph-1|chr3R|-	0.62	0.32	-0.3
NM_166709|CG30428|chr2R|+	0.91	0.61	-0.3
NM_001170093|hyx|chr3R|+	0.63	0.33	-0.3
NM_079046|EDTP|chr2R|-	0.43	0.13	-0.3
NM_143636|CG2135|chr3R|-	0.48	0.18	-0.3
NM_167488|kat80|chrX|-	0.35	0.05	-0.3
NM_133124|RhoGAP18B|chrX|-	0.78	0.48	-0.3
NM_143482|CG15514|chr3R|-	0.81	0.51	-0.3
NM_165469|Pld|chr2R|+	0.49	0.19	-0.3
NR_073726|CR31912|chr2L|+	0.85	0.55	-0.3
NM_143481|CG7824|chr3R|-	0.76	0.46	-0.3
NM_168298|Tsp66E|chr3L|+	0.59	0.29	-0.3
NM_001169807|Pde8|chr2R|+	0.85	0.55	-0.3
NM_001272400|Trf2|chrX|+	0.6	0.3	-0.3
NM_139755|Jon65Aiv|chr3L|+	0.67	0.38	-0.29
NM_001272152|ATPsyn-beta|chr4|+	0.89	0.6	-0.29
NM_140737|Jon74E|chr3L|-	0.88	0.59	-0.29
NM_165394|Ef2b|chr2L|-	0.97	0.68	-0.29
NM_057307|ng1|chrX|+	0.59	0.3	-0.29
NM_079590|Ugt35a|chr3R|-	1	0.71	-0.29
NM_140977|CG6020|chr3L|+	0.57	0.28	-0.29
NM_137222|CG8299|chr2R|-	0.93	0.64	-0.29
NM_142964|CG6178|chr3R|+	0.91	0.62	-0.29
NM_001169213|Inx2|chrX|+	1	0.71	-0.29
NM_140511|CG7272|chr3L|+	0.42	0.13	-0.29
NM_134975|CG3702|chr2L|-	1	0.71	-0.29
NM_001169994|Indy|chr3L|-	0.7	0.41	-0.29
NM_168702|Nc73EF|chr3L|+	0.59	0.3	-0.29
NM_144281|CG9034|chrX|-	0.58	0.29	-0.29
NM_080383|NitFhit|chr3L|+	1	0.71	-0.29
NM_001170384|CG40160|chr3LHet|+	1	0.71	-0.29
NM_079115|Dat|chr2R|+	0.76	0.47	-0.29
NM_137847|bonsai|chr2R|+	0.92	0.63	-0.29
NM_080192|Catsup|chr2L|+	0.72	0.43	-0.29
NM_140518|AGO2|chr3L|+	0.92	0.63	-0.29
NM_079874|ferrochelatase|chr3R|-	0.98	0.69	-0.29
NM_143781|l(2)08717|chr2R|-	0.91	0.62	-0.29
NM_132249|CG1440|chrX|+	0.44	0.15	-0.29
NM_001275170|CG17147|chr3L|+	0.79	0.5	-0.29
NM_001258482|Crk|chr4|+	0.61	0.32	-0.29
NM_001144319|Tfb5|chr2L|-	0.48	0.19	-0.29
NM_058064|nop5|chr2L|-	0.46	0.17	-0.29
NM_170329|TfIIA-L|chr3R|+	0.54	0.25	-0.29
NM_141330|CG2051|chr3R|-	1	0.71	-0.29
NM_137562|CG18607|chr2R|+	0.83	0.54	-0.29
NM_142081|twf|chr3R|+	0.87	0.58	-0.29
NM_140765|CG16775|chr3L|-	0.8	0.51	-0.29
NM_079053|Rab4|chr2R|+	0.71	0.42	-0.29
NM_001043001|CG14464|chr2R|+	0.45	0.16	-0.29
NM_141746|Cyp12e1|chr3R|+	0.85	0.56	-0.29
NM_166482|Tango11|chr2R|-	0.74	0.45	-0.29
NM_167788|Cda4|chrX|-	0.61	0.32	-0.29
NM_001169780|Oatp58Dc|chr2R|-	0.57	0.28	-0.29
NM_078597|mRpL38|chrX|+	0.83	0.54	-0.29
NM_132542|Sclp|chrX|-	0.37	0.08	-0.29
NM_165630|sec31|chr2R|+	0.68	0.39	-0.29
NM_001014677|Rb97D|chr3R|-	0.93	0.64	-0.29
NM_140132|scramb1|chr3L|-	0.52	0.23	-0.29
NM_134801|CG4259|chr2L|-	0.86	0.57	-0.29
NM_137251|clu|chr2R|+	0.77	0.48	-0.29
NM_134509|Alr|chrX|+	1	0.71	-0.29
NM_001169473|CG6700|chr2L|-	0.43	0.14	-0.29
NM_001274595|ltl|chr3L|+	0.98	0.69	-0.29
NM_141584|CG8379|chr3R|+	0.67	0.38	-0.29
NM_169022|Cdep|chr3R|+	0.69	0.4	-0.29
NM_141236|atms|chr3R|+	0.6	0.31	-0.29
NM_142459|Nup43|chr3R|+	0.88	0.59	-0.29
NM_001274071|Khc-73|chr2R|-	0.43	0.14	-0.29
NM_140513|CG7841|chr3L|-	0.52	0.23	-0.29
NM_001275492|MBD-like|chr3R|+	0.72	0.43	-0.29
NM_132014|CG4119|chrX|+	1	0.71	-0.29
NM_001259756|dally|chr3L|+	0.56	0.27	-0.29
NM_001274656|foi|chr3L|+	0.71	0.42	-0.29
NM_140174|CG7839|chr3L|+	0.4	0.11	-0.29
NM_134786|CG7337|chr2L|+	0.88	0.59	-0.29
NM_176244|dom|chr2R|+	0.89	0.6	-0.29
NM_141321|CG2100|chr3R|-	0.76	0.47	-0.29
NM_001104435|CG6422|chr3R|-	0.61	0.32	-0.29
NM_141212|Spargel|chr3R|-	0.88	0.59	-0.29
NM_145106|Gug|chr3L|+	0.61	0.32	-0.29
NM_141146|CG14456|chr3L|+	0.75	0.46	-0.29
NM_001276214|Gprk2|chr3R|+	0.69	0.4	-0.29
NM_170459|Axn|chr3R|+	0.88	0.59	-0.29
NM_166231|qkr54B|chr2R|+	0.84	0.55	-0.29
NM_001169505|CG31775|chr2L|-	0.45	0.17	-0.28
NM_166890|sta|chrX|-	0.96	0.68	-0.28
NM_165824|CG30031|chr2R|+	0.79	0.51	-0.28
NM_001110960|RpL15|chr3LHet|+	0.98	0.7	-0.28
NM_165823|gammaTry|chr2R|+	0.79	0.51	-0.28
NM_142665|RpS30|chr3R|+	0.5	0.22	-0.28
NM_080042|RpL37A|chr2L|+	0.8	0.52	-0.28
NM_143753|VhaPPA1-1|chr3R|-	0.77	0.49	-0.28
NM_140482|CG18649|chr3L|-	0.51	0.23	-0.28
NM_142502|CG14292|chr3R|-	0.92	0.64	-0.28
NM_001169723|CG5174|chr2R|+	1	0.72	-0.28
NM_057327|CG9757|chr3R|-	0.98	0.7	-0.28
NR_073641|CR43836|chrX|-	0.62	0.34	-0.28
NM_141807|CG5214|chr3R|+	0.66	0.38	-0.28
NM_140001|CG13311|chr3L|-	0.99	0.71	-0.28
NM_131943|CG11444|chrX|-	0.95	0.67	-0.28
NM_138036|CG3209|chr2R|+	0.51	0.23	-0.28
NM_140912|Tom20|chr3L|+	0.74	0.46	-0.28
NM_137015|CG10799|chr2R|+	0.88	0.6	-0.28
NM_001275397|CG1943|chr3R|+	0.66	0.38	-0.28
NM_167539|TwdlX|chrX|+	0.5	0.22	-0.28
NM_058066|UbcD10|chr2R|-	0.87	0.59	-0.28
NM_130501|CG5273|chrX|+	1	0.72	-0.28
NM_140496|Pex3|chr3L|+	1	0.72	-0.28
NM_136899|Cyp6g1|chr2R|+	0.52	0.24	-0.28
NM_001275029|Mo25|chr3L|-	0.94	0.66	-0.28
NM_141693|CG8507|chr3R|+	0.35	0.07	-0.28
NM_142697|CG5862|chr3R|+	0.92	0.64	-0.28
NM_136974|mRpL18|chr2R|+	1	0.72	-0.28
NM_164736|milt|chr2L|+	0.77	0.49	-0.28
NM_143634|Smvt|chr3R|-	0.81	0.53	-0.28
NM_001103806|CG34229|chr2R|+	0.35	0.07	-0.28
NM_132237|CG2147|chrX|+	0.98	0.7	-0.28
NM_001014676|Rb97D|chr3R|-	1	0.72	-0.28
NM_057754|Sr-CI|chr2L|+	0.82	0.54	-0.28
NM_001273488|Oatp33Ea|chr2L|-	0.64	0.36	-0.28
NM_142185|MRG15|chr3R|-	1	0.72	-0.28
NM_139403|CG2021|chr3L|-	0.88	0.6	-0.28
NM_137387|CG14480|chr2R|+	0.67	0.39	-0.28
NM_135345|CG8475|chr2L|-	0.61	0.33	-0.28
NM_168404|scramb1|chr3L|-	0.51	0.23	-0.28
NM_165804|CG30016|chr2R|-	0.55	0.27	-0.28
NM_141346|CG2017|chr3R|-	0.66	0.38	-0.28
NM_137358|CG12699|chr2R|-	0.71	0.43	-0.28
NM_001104488|CG1646|chr3R|+	0.71	0.43	-0.28
NM_137823|babos|chr2R|-	0.74	0.46	-0.28
NM_001258716|CG3775|chrX|+	0.9	0.62	-0.28
NM_165040|CG31855|chr2L|+	0.48	0.2	-0.28
NM_001103438|CG33181|chrX|+	0.78	0.5	-0.28
NM_001258932|bowl|chr2L|+	0.69	0.41	-0.28
NM_001259202|CG3635|chr2L|+	0.43	0.15	-0.28
NM_168907|Hr78|chr3L|-	0.8	0.52	-0.28
NM_136420|Gadd45|chr2R|+	0.73	0.45	-0.28
NM_001258584|Mnt|chrX|+	0.89	0.61	-0.28
NM_001201735|Ucp4A|chrX|+	0.67	0.39	-0.28
NM_001103493|Sec16|chrX|+	0.61	0.33	-0.28
NM_001272559|Sec16|chrX|+	0.61	0.33	-0.28
NM_132584|Sec16|chrX|+	0.61	0.33	-0.28
NM_145873|CG18659|chr2R|-	0.79	0.51	-0.28
NM_079533|alpha-Est10|chr3R|-	0.6	0.32	-0.28
NM_001275873|slmb|chr3R|-	0.6	0.32	-0.28
NM_001043288|CG13624|chr3R|-	0.91	0.63	-0.28
NM_001275793|dnk|chr3R|+	0.7	0.42	-0.28
NM_143064|Smg6|chr3R|-	0.64	0.36	-0.28
NM_057673|Mef2|chr2R|-	0.78	0.5	-0.28
NM_001273331|lmgB|chr2L|-	1	0.72	-0.28
NM_141568|CG9797|chr3R|-	0.53	0.25	-0.28
NM_078884|betaInt-nu|chr2L|+	0.88	0.6	-0.28
NM_079573|alphaTub85E|chr3R|-	0.78	0.5	-0.28
NM_080241|gk|chr3L|+	0.56	0.28	-0.28
NM_001170041|CG2100|chr3R|-	0.72	0.44	-0.28
NM_001259804|app|chr3L|-	0.91	0.63	-0.28
NM_001259256|CG43340|chr2R|+	0.78	0.5	-0.28
NM_142220|CG6045|chr3R|-	0.73	0.45	-0.28
NM_139905|CG8111|chr3L|-	0.7	0.42	-0.28
NM_079158|LysB|chr3L|+	1	0.73	-0.27
NM_168313|Argk|chr3L|-	0.9	0.63	-0.27
NM_057283|RpL19|chr2R|-	0.48	0.21	-0.27
NM_001273288|Rack1|chr2L|-	0.84	0.57	-0.27
NM_167247|sesB|chrX|-	0.76	0.49	-0.27
NM_001260387|CG43117|chr3R|+	0.58	0.31	-0.27
NM_165870|Cam|chr2R|+	0.6	0.33	-0.27
NM_057733|CG5210|chr2R|+	0.84	0.57	-0.27
NM_167272|ran|chrX|-	0.78	0.51	-0.27
NM_139892|CG12262|chr3L|+	0.82	0.55	-0.27
NM_165158|Idgf3|chr2L|+	0.95	0.68	-0.27
NM_137045|CG42807|chr2R|-	0.8	0.53	-0.27
NM_142610|CG5023|chr3R|+	0.76	0.49	-0.27
NM_001272925|Pino|chr2L|-	1	0.73	-0.27
NM_167081|l(1)G0255|chrX|+	0.58	0.31	-0.27
NM_143266|CG17191|chr3R|-	0.88	0.61	-0.27
NM_176714|CG10962|chrX|-	0.61	0.34	-0.27
NM_001169934|CG42455|chr3L|+	0.99	0.72	-0.27
NM_001276159|CG15515|chr3R|+	0.56	0.29	-0.27
NM_079692|Elongin-B|chr3R|-	0.69	0.42	-0.27
NM_137331|ste24a|chr2R|-	1	0.73	-0.27
NM_001275868|AnnIX|chr3R|+	0.52	0.25	-0.27
NM_001275972|CG5515|chr3R|-	0.92	0.65	-0.27
NM_132511|CG2444|chrX|-	0.4	0.13	-0.27
NM_137399|P32|chr2R|-	0.44	0.17	-0.27
NM_135850|Cyp28a5|chr2L|+	0.53	0.26	-0.27
NM_078914|Tsp42El|chr2R|+	0.4	0.13	-0.27
NM_137798|GM130|chr2R|-	1	0.73	-0.27
NM_142967|CG5510|chr3R|-	0.88	0.61	-0.27
NM_001273064|Hydr2|chr2L|+	0.74	0.47	-0.27
NM_001014672|Rb97D|chr3R|-	1	0.73	-0.27
NM_001274003|sug|chr2R|+	0.92	0.65	-0.27
NM_001201849|CG17768|chr2L|-	0.65	0.38	-0.27
NM_001274840|tral|chr3L|+	0.66	0.39	-0.27
NM_079752|mRpS24|chr3R|-	0.76	0.49	-0.27
NM_136545|Cyp6a14|chr2R|-	0.72	0.45	-0.27
NM_144379|lectin-28C|chr2L|+	0.48	0.21	-0.27
NM_001169400|ine|chr2L|-	0.63	0.36	-0.27
NM_078872|bsf|chr2L|-	0.92	0.65	-0.27
NM_079146|mRpL17|chr3L|+	0.69	0.42	-0.27
NM_206209|l(2)tid|chr2R|+	0.67	0.4	-0.27
NM_080193|l(2)tid|chr2R|+	0.66	0.39	-0.27
NM_140003|CG13312|chr3L|-	0.9	0.63	-0.27
NM_140068|pall|chr3L|-	1	0.73	-0.27
NM_140330|ver|chr3L|+	1	0.73	-0.27
NM_166244|CG30109|chr2R|+	0.46	0.19	-0.27
NM_141847|CG6834|chr3R|-	0.37	0.1	-0.27
NM_144351|pont|chr3R|+	0.47	0.2	-0.27
NM_001274664|CG5989|chr3L|-	0.62	0.35	-0.27
NM_001272802|Alr|chrX|+	1	0.73	-0.27
NM_001275214|pzg|chr3L|+	0.71	0.44	-0.27
NM_142623|Sirt2|chr3R|+	0.84	0.57	-0.27
NM_134606|CG1486|chrX|+	0.6	0.33	-0.27
NM_135374|CG13390|chr2L|-	1	0.73	-0.27
NM_133150|out|chrX|-	0.46	0.19	-0.27
NM_206374|CrebA|chr3L|+	0.79	0.52	-0.27
NM_057449|cdc2|chr2L|-	0.43	0.16	-0.27
NM_169587|CG7987|chr3R|-	0.68	0.41	-0.27
NM_169676|cv-d|chr3R|-	0.72	0.45	-0.27
NM_001104344|Fas1|chr3R|+	0.7	0.43	-0.27
NM_142399|CG7379|chr3R|-	0.79	0.52	-0.27
NM_167309|CG43154|chrX|+	0.64	0.37	-0.27
NM_001202340|sav|chr3R|-	0.6	0.33	-0.27
NM_132932|CG9634|chrX|-	0.65	0.38	-0.27
NM_001260386|CG6503|chr3R|-	0.38	0.11	-0.27
NM_079137|uzip|chr2R|+	0.59	0.32	-0.27
NM_135922|CG3793|chr2L|+	0.59	0.32	-0.27
NM_136623|Rme-8|chr2R|-	0.53	0.26	-0.27
NM_001169353|Eph|chr4|+	0.52	0.25	-0.27
NM_001260384|CG6073|chr3R|-	0.91	0.64	-0.27
NM_001259450|CG6805|chr2R|+	0.53	0.26	-0.27
NM_001276164|CG7903|chr3R|-	0.41	0.14	-0.27
NM_135476|Etl1|chr2L|-	0.68	0.41	-0.27
NM_001169428|uif|chr2L|-	0.6	0.33	-0.27
NM_001032010|fabp|chr3R|-	0.34	0.08	-0.26
NM_057282|RpLP1|chr2L|+	0.83	0.57	-0.26
NM_135441|Aldh|chr2L|+	0.98	0.72	-0.26
NM_057686|tsr|chr2R|-	0.3	0.04	-0.26
NM_167207|Idgf4|chrX|-	0.75	0.49	-0.26
NM_001258906|CG43349|chr2L|+	0.51	0.25	-0.26
NM_079745|Pros26.4|chr3R|-	1	0.74	-0.26
NM_136832|CG12384|chr2R|-	0.39	0.13	-0.26
NM_142863|CG6726|chr3R|+	0.45	0.19	-0.26
NM_142517|NP15.6|chr3R|+	0.8	0.54	-0.26
NM_078968|etaTry|chr2R|-	1	0.74	-0.26
NM_001201993|CG42806|chr2R|+	1	0.74	-0.26
NM_135072|Cyp4ac1|chr2L|+	0.99	0.73	-0.26
NM_001274073|CG12963|chr2R|+	0.71	0.45	-0.26
NM_057932|Lcp65Aa|chr3L|+	0.87	0.61	-0.26
NM_130718|HIP|chrX|+	0.62	0.36	-0.26
NM_137316|CG5550|chr2R|+	0.35	0.09	-0.26
NM_140016|Srp68|chr3L|+	0.89	0.63	-0.26
NM_132452|Vago|chrX|+	0.6	0.34	-0.26
NM_169221|stck|chr3R|+	0.77	0.51	-0.26
NM_135689|CG12264|chr2L|+	0.64	0.38	-0.26
NM_001169928|UGP|chr3L|-	0.7	0.44	-0.26
NM_001169641|whd|chr2R|-	0.62	0.36	-0.26
NM_206223|CG33229|chr3L|+	0.57	0.31	-0.26
NM_145191|CG4098|chr3L|-	1	0.74	-0.26
NM_141064|Est-Q|chr3L|+	0.95	0.69	-0.26
NM_142915|CG31148|chr3R|+	0.54	0.28	-0.26
NM_143789|CG11899|chr3R|+	0.43	0.17	-0.26
NM_168115|lama|chr3L|-	0.89	0.63	-0.26
NM_132451|CG15203|chrX|+	0.47	0.21	-0.26
NM_001275659|MRG15|chr3R|-	1	0.74	-0.26
NM_001273193|stai|chr2L|+	0.58	0.32	-0.26
NM_143202|CG14550|chr3R|-	0.84	0.58	-0.26
NM_057779|Iap2|chr2R|-	0.69	0.43	-0.26
NM_135825|TM9SF4|chr2L|+	0.65	0.39	-0.26
NM_140289|ssp|chr3L|+	0.57	0.31	-0.26
NM_167650|mRpS14|chrX|-	0.61	0.35	-0.26
NM_078749|mRpS2|chr2L|-	0.85	0.59	-0.26
NM_001273085|ed|chr2L|+	0.98	0.72	-0.26
NM_140170|blos2|chr3L|+	0.95	0.69	-0.26
NM_141633|CG8135|chr3R|+	1	0.74	-0.26
NM_170287|Tl|chr3R|+	1	0.74	-0.26
NM_080323|dm|chrX|+	0.83	0.57	-0.26
NM_206196|CG33225|chr2R|+	0.7	0.44	-0.26
NM_001259740|Unr|chr3L|-	0.82	0.56	-0.26
NM_001202076|Mmp1|chr2R|-	0.67	0.41	-0.26
NM_134559|Cyp6v1|chrX|+	0.9	0.64	-0.26
NM_168449|Alg10|chr3L|+	0.94	0.68	-0.26
NM_079597|Ho|chr3R|+	0.63	0.37	-0.26
NM_001259570|Mmp1|chr2R|-	0.67	0.41	-0.26
NM_176521|mod(mdg4)|chr3R|+	0.8	0.54	-0.26
NM_131987|Sas10|chrX|+	0.89	0.63	-0.26
NM_001272878|Tbc1d15-17|chr2L|+	0.98	0.72	-0.26
NM_001014499|Nipped-A|chr2R|-	0.58	0.32	-0.26
NM_136701|CG12129|chr2R|+	0.63	0.37	-0.26
NR_047763|CR43614|chrX|-	0.87	0.61	-0.26
NM_136953|Ak6|chr2R|-	0.44	0.18	-0.26
NM_139408|GV1|chr3L|+	0.69	0.43	-0.26
NM_169052|kkv|chr3R|-	0.9	0.64	-0.26
NM_001038806|CG6144|chr2L|+	0.78	0.52	-0.26
NM_001274257|CG7028|chr3L|-	0.65	0.39	-0.26
NM_001169666|Kdm4B|chr2R|-	0.44	0.18	-0.26
NM_140590|CG5027|chr3L|+	0.8	0.54	-0.26
NM_143480|dgt1|chr3R|-	0.67	0.41	-0.26
NM_165823|gammaTry|chr2R|-	0.8	0.55	-0.25
NM_165824|CG30031|chr2R|-	0.8	0.55	-0.25
NM_168266|Idh|chr3L|-	1	0.75	-0.25
NM_001272964|Nplp4|chr2L|+	0.38	0.13	-0.25
NM_137981|CG11300|chr2R|+	0.56	0.31	-0.25
NM_001274433|Hsp83|chr3L|+	1	0.75	-0.25
NM_132689|CG11151|chrX|+	0.52	0.27	-0.25
NM_001273418|Ip259|chr2L|+	1	0.75	-0.25
NM_058031|Ip259|chr2L|+	1	0.75	-0.25
NM_143773|l(2)03709|chr2R|+	1	0.75	-0.25
NM_001169368|Gs1|chr2L|+	0.86	0.61	-0.25
NM_001274546|ImpL3|chr3L|-	0.5	0.25	-0.25
NM_001032249|Zasp52|chr2R|-	1	0.75	-0.25
NM_078939|Pgi|chr2R|-	0.57	0.32	-0.25
NM_139727|CG10576|chr3L|-	0.73	0.48	-0.25
NM_079472|AcCoAS|chr3L|-	0.81	0.56	-0.25
NM_142618|CG4367|chr3R|-	0.71	0.46	-0.25
NM_136384|CG3270|chr2R|+	1	0.75	-0.25
NM_205966|vir-1|chr2L|-	0.52	0.27	-0.25
NM_001273881|Acsl|chr2R|+	0.77	0.52	-0.25
NM_166045|SelD|chr2R|-	1	0.75	-0.25
NM_164624|His3.3A|chr2L|+	0.57	0.32	-0.25
NM_167289|CG1572|chrX|-	0.76	0.51	-0.25
NM_001031915|CG33713|chrX|-	0.95	0.7	-0.25
NM_176440|p24-2|chr3R|-	0.51	0.26	-0.25
NM_001273902|Uba1|chr2R|-	0.89	0.64	-0.25
NM_142791|Rpn7|chr3R|-	0.88	0.63	-0.25
NM_136470|CG12107|chr2R|+	0.37	0.12	-0.25
NM_136299|CG3262|chr2L|+	0.92	0.67	-0.25
NM_140043|UGP|chr3L|-	0.37	0.12	-0.25
NM_168788|nes|chr3L|-	1	0.75	-0.25
NM_141631|CG8132|chr3R|+	0.97	0.72	-0.25
NM_137982|CG5532|chr2R|+	0.7	0.45	-0.25
NM_057480|LysP|chr3L|-	0.64	0.39	-0.25
NM_136000|CG6453|chr2L|-	0.6	0.35	-0.25
NM_169220|stck|chr3R|+	0.77	0.52	-0.25
NM_169068|Rheb|chr3R|+	0.65	0.4	-0.25
NM_141102|CG14572|chr3L|+	0.71	0.46	-0.25
NM_001015320|eIF-4B|chr2RHet|+	0.68	0.43	-0.25
NM_136880|CG8888|chr2R|-	0.78	0.53	-0.25
NM_132508|CG1703|chrX|+	0.92	0.67	-0.25
NM_169762|CG5840|chr3R|+	0.28	0.03	-0.25
NM_142386|CG7523|chr3R|-	0.58	0.33	-0.25
NM_153772|MED8|chr2R|-	1	0.75	-0.25
NM_080207|PpD3|chr3R|+	0.44	0.19	-0.25
NM_135090|CG7277|chr2L|-	0.89	0.64	-0.25
NM_001273761|Tif-IA|chr2L|+	0.34	0.09	-0.25
NM_001259193|CG43346|chr2L|-	0.95	0.7	-0.25
NM_167903|ABCB7|chr3L|+	0.49	0.24	-0.25
NM_141942|CG5844|chr3R|+	0.56	0.31	-0.25
NM_165968|Spt-I|chr2R|+	0.51	0.26	-0.25
NM_001104402|CG34376|chr3R|+	1	0.75	-0.25
NM_134573|Npc1b|chrX|+	0.91	0.66	-0.25
NM_139504|scramb2|chr3L|-	0.57	0.32	-0.25
NM_001275332|tacc|chr3R|-	0.45	0.2	-0.25
NM_167421|Flo-2|chrX|+	0.36	0.11	-0.25
NM_166642|CG3065|chr2R|+	0.98	0.73	-0.25
NM_057665|ine|chr2L|-	0.56	0.31	-0.25
NM_165949|Dgkepsilon|chr2R|+	1	0.75	-0.25
NM_134986|Dim1|chr2L|+	0.48	0.23	-0.25
NM_058070|Taf10b|chr2L|-	0.85	0.6	-0.25
NM_138759|bur|chr2L|-	0.71	0.46	-0.25
NM_139928|MED24|chr3L|+	0.96	0.71	-0.25
NM_141646|RnpS1|chr3R|+	0.97	0.72	-0.25
NM_132047|CG16721|chrX|+	0.75	0.5	-0.25
NM_057770|crn|chrX|-	1	0.75	-0.25
NM_001169974|bmm|chr3L|-	0.74	0.49	-0.25
NM_079479|Hr78|chr3L|-	0.82	0.57	-0.25
NM_079965|Mkrn1|chr3L|-	0.48	0.23	-0.25
NM_169548|flfl|chr3R|+	0.84	0.59	-0.25
NM_143402|Slu7|chr3R|-	0.95	0.7	-0.25
NM_135341|CG8552|chr2L|-	0.74	0.49	-0.25
NM_144348|c12.1|chrX|-	0.81	0.56	-0.25
NM_001104094|I-2|chr3L|-	0.63	0.38	-0.25
NM_132637|CG2453|chrX|-	0.33	0.08	-0.25
NM_001103588|CG15387|chr2L|-	0.45	0.2	-0.25
NM_001202368|CG6503|chr3R|-	0.38	0.13	-0.25
NM_144382|CG3021|chrX|+	0.77	0.52	-0.25
NM_170234|jigr1|chr3R|+	0.68	0.43	-0.25
NR_033167|CR42549|chr3R|-	0.87	0.62	-0.25
NM_057671|Mef2|chr2R|-	0.72	0.47	-0.25
NM_168023|CG11526|chr3L|-	0.42	0.17	-0.25
NM_132197|CG10778|chrX|-	0.61	0.36	-0.25
NM_137757|NC2alpha|chr2R|+	0.88	0.63	-0.25
NM_001169943|CG6279|chr3L|-	0.68	0.43	-0.25
NM_137825|Mes4|chr2R|+	0.64	0.39	-0.25
NM_140623|CG4933|chr3L|+	0.78	0.53	-0.25
NM_206068|CG12128|chr2R|+	0.79	0.54	-0.25
NM_140983|mTerf3|chr3L|-	0.63	0.38	-0.25
NM_079830|Jon99Cii|chr3R|-	1	0.76	-0.24
NM_057424|alphaTub84B|chr3R|+	0.86	0.62	-0.24
NM_001202043|CG15093|chr2R|-	1	0.76	-0.24
NM_057947|Thor|chr2L|+	0.72	0.48	-0.24
NM_137529|CG15093|chr2R|-	0.97	0.73	-0.24
NM_001259889|CG43085|chr3L|-	1	0.76	-0.24
NM_001169607|CG30382|chr2R|-	0.64	0.4	-0.24
NM_170386|CG11876|chr3R|+	0.36	0.12	-0.24
NM_140911|CG7433|chr3L|-	0.79	0.55	-0.24
NM_135919|CG18477|chr2L|+	1	0.76	-0.24
NM_080227|PebIII|chr2R|+	0.76	0.52	-0.24
NM_142016|CG8773|chr3R|+	0.73	0.49	-0.24
NM_058097|Manf|chr3R|+	0.44	0.2	-0.24
NM_143767|Spn27A|chr2L|-	0.99	0.75	-0.24
NM_001259544|CG3499|chr2R|-	1	0.76	-0.24
NM_164511|CG31694|chr2L|-	0.51	0.27	-0.24
NM_142687|CG5793|chr3R|+	0.89	0.65	-0.24
NM_079770|OstStt3|chr3R|-	0.77	0.53	-0.24
NM_001169593|l(2)01289|chr2R|-	1	0.76	-0.24
NM_142637|CG10877|chr3R|-	0.9	0.66	-0.24
NM_136786|Rpb5|chr2R|-	1	0.76	-0.24
NM_137656|maf-S|chr2R|+	0.75	0.51	-0.24
NM_143114|CG10514|chr3R|-	0.55	0.31	-0.24
NM_001259010|Snx6|chr2L|-	0.69	0.45	-0.24
NM_057425|tud|chr2R|+	0.9	0.66	-0.24
NM_078773|ade3|chr2L|-	1	0.76	-0.24
NM_080499|Zip3|chr3R|+	0.31	0.07	-0.24
NM_134932|CG2772|chr2L|+	0.65	0.41	-0.24
NM_135323|CG7231|chr2L|+	0.64	0.4	-0.24
NM_135721|CG5446|chr2L|-	0.45	0.21	-0.24
NM_143632|salt|chr3R|-	0.43	0.19	-0.24
NM_001273038|daw|chr2L|+	0.31	0.07	-0.24
NM_132582|CG1824|chrX|-	0.43	0.19	-0.24
NM_080040|san|chr2R|+	0.64	0.4	-0.24
NM_058115|Taf10|chr2L|+	0.44	0.2	-0.24
NM_138062|CG3394|chr2R|+	0.76	0.52	-0.24
NM_206748|Stim|chrX|-	0.34	0.1	-0.24
NM_135726|Oatp33Eb|chr2L|+	0.84	0.6	-0.24
NM_137754|pirk|chr2R|-	0.89	0.65	-0.24
NM_001274554|CG10103|chr3L|-	0.43	0.19	-0.24
NM_167313|pot|chrX|-	1	0.76	-0.24
NM_001259779|A2bp1|chr3L|+	0.98	0.74	-0.24
NM_001260165|CG43179|chr3R|+	0.42	0.18	-0.24
NM_137335|Ehbp1|chr2R|-	1	0.76	-0.24
NM_136347|Src42A|chr2R|+	0.36	0.12	-0.24
NM_140243|crim|chr3L|-	0.78	0.54	-0.24
NM_001275539|Tsp86D|chr3R|+	1	0.76	-0.24
NM_136044|CG10333|chr2L|+	1	0.76	-0.24
NM_001038967|CG8927|chr3R|+	1	0.76	-0.24
NM_080325|lva|chrX|-	0.57	0.33	-0.24
NM_001274650|Unr|chr3L|-	0.73	0.49	-0.24
NM_140727|CG7589|chr3L|+	0.44	0.2	-0.24
NM_001104369|Ire1|chr3R|-	0.93	0.69	-0.24
NM_139532|CG14967|chr3L|-	0.88	0.64	-0.24
NM_001276003|nct|chr3R|+	0.82	0.58	-0.24
NM_134543|l(1)G0004|chrX|+	0.87	0.63	-0.24
NM_001169592|CG3409|chr2R|-	0.54	0.3	-0.24
NM_168912|Cdk12|chr3L|+	0.54	0.3	-0.24
NM_130592|MED18|chrX|+	0.48	0.24	-0.24
NM_140205|CG7560|chr3L|+	0.6	0.36	-0.24
NM_134663|CG3645|chr2L|-	0.75	0.51	-0.24
NM_001144470|sowah|chr3L|-	0.76	0.52	-0.24
NM_167323|Rab40|chrX|-	0.55	0.31	-0.24
NM_170247|Lnk|chr3R|+	0.49	0.25	-0.24
NM_165825|CG30025|chr2R|-	0.75	0.52	-0.23
NM_175947|CG33128|chr2L|+	1	0.77	-0.23
NM_137436|CG10910|chr2R|+	0.86	0.63	-0.23
NM_143454|Obp99c|chr3R|-	0.63	0.4	-0.23
NM_165865|Oda|chr2R|-	0.5	0.27	-0.23
NM_078540|His3.3B|chrX|-	0.95	0.72	-0.23
NM_132357|CG1468|chrX|+	0.8	0.57	-0.23
NM_001043301|Cnx99A|chr3R|-	1	0.77	-0.23
NM_001272588|CG32633|chrX|+	0.92	0.69	-0.23
NM_079362|mex1|chr3L|-	0.92	0.69	-0.23
NM_140935|CG17145|chr3L|+	0.95	0.72	-0.23
NM_140760|CG7430|chr3L|+	0.44	0.21	-0.23
NM_133129|Mec2|chrX|+	0.36	0.13	-0.23
NM_165063|Arpc1|chr2L|-	0.87	0.64	-0.23
NM_140802|Aut1|chr3L|+	0.98	0.75	-0.23
NM_079126|Cyp9c1|chr2R|+	0.68	0.45	-0.23
NM_080109|Hex-A|chrX|+	0.95	0.72	-0.23
NM_165981|IM10|chr2R|+	0.64	0.41	-0.23
NM_137541|Jheh1|chr2R|-	0.71	0.48	-0.23
NM_136830|kappaTry|chr2R|-	0.77	0.54	-0.23
NM_057352|ref(2)P|chr2L|+	0.72	0.49	-0.23
NM_176491|B52|chr3R|+	0.81	0.58	-0.23
NM_136210|CG9319|chr2L|-	1	0.77	-0.23
NM_142571|CG6300|chr3R|-	0.93	0.7	-0.23
NM_136277|CG1416|chr2L|+	0.47	0.24	-0.23
NM_140242|mtTFB1|chr3L|+	0.85	0.62	-0.23
NR_002097|roX1|chrX|-	0.87	0.64	-0.23
NM_001201820|Ggamma30A|chr2L|+	0.64	0.41	-0.23
NM_001273484|CG5446|chr2L|-	0.44	0.21	-0.23
NM_141522|CG11672|chr3R|-	0.81	0.58	-0.23
NM_140177|CG6272|chr3L|-	0.84	0.61	-0.23
NM_135306|LKR|chr2L|-	0.83	0.6	-0.23
NM_136373|Fmo-2|chr2R|-	0.51	0.28	-0.23
NM_079550|RpA-70|chr3R|-	0.63	0.4	-0.23
NM_167624|Aats-his|chrX|+	0.65	0.42	-0.23
NM_139911|CG8038|chr3L|-	1	0.77	-0.23
NM_142208|CG6125|chr3R|-	0.74	0.51	-0.23
NM_134725|CG4552|chr2L|+	1	0.77	-0.23
NM_001202064|CG9849|chr2R|+	0.85	0.62	-0.23
NM_078535|Nrg|chrX|+	0.58	0.35	-0.23
NM_140055|Bet3|chr3L|-	0.47	0.24	-0.23
NM_001144543|CG1021|chr3R|-	0.99	0.76	-0.23
NM_140519|CG7739|chr3L|-	0.69	0.46	-0.23
NM_176032|nimB4|chr2L|-	0.71	0.48	-0.23
NM_001272219|mRpL16|chrX|+	0.48	0.25	-0.23
NM_134479|CG14205|chrX|+	0.44	0.21	-0.23
NM_001110899|CG41378|chr2RHet|-	0.49	0.26	-0.23
NM_138029|MAN1|chr2R|+	1	0.77	-0.23
NM_140876|Lon|chr3L|-	0.79	0.56	-0.23
NM_206133|CG33459|chr2R|+	0.69	0.46	-0.23
NM_133145|CG8010|chrX|-	0.75	0.52	-0.23
NM_170492|PH4alphaEFB|chr3R|+	0.5	0.27	-0.23
NM_164981|CG18789|chr2L|-	0.73	0.5	-0.23
NM_079937|sls|chr3L|-	1	0.77	-0.23
NM_170273|CG5455|chr3R|+	0.87	0.64	-0.23
NM_001259658|prominin-like|chr3L|-	0.86	0.63	-0.23
NM_143286|grass|chr3R|+	0.9	0.67	-0.23
NM_132676|tth|chrX|-	0.64	0.41	-0.23
NM_165664|CG8026|chr2R|-	0.74	0.51	-0.23
NM_136444|CG12736|chr2R|-	0.33	0.1	-0.23
NM_142192|CG31301|chr3R|+	0.46	0.23	-0.23
NM_001260311|loco|chr3R|-	0.83	0.6	-0.23
NM_139703|membrin|chr3L|+	0.59	0.36	-0.23
NM_136294|CG3635|chr2L|+	0.68	0.45	-0.23
NM_134897|GABPI|chr2L|+	0.53	0.3	-0.23
NM_132864|Rrp47|chrX|+	0.65	0.42	-0.23
NM_001104472|spz|chr3R|-	0.42	0.19	-0.23
NM_001144372|CG31678|chr2L|-	0.74	0.51	-0.23
NM_141946|CG18549|chr3R|+	0.6	0.37	-0.23
NM_136353|tbce|chr2R|+	0.52	0.29	-0.23
NM_001043251|Mhcl|chr3R|-	0.7	0.47	-0.23
NM_141214|CG1074|chr3R|+	0.82	0.59	-0.23
NM_143123|CG10550|chr3R|-	0.54	0.31	-0.23
NM_001258692|CG1597|chrX|-	0.51	0.28	-0.23
NM_001104160|Exn|chr3L|+	0.48	0.25	-0.23
NM_057500|CycC|chr3R|-	0.57	0.34	-0.23
NM_165618|Jon44E|chr2R|+	0.98	0.76	-0.22
NM_137351|CG11395|chr2R|+	1	0.78	-0.22
NM_132844|CG8952|chrX|-	0.93	0.71	-0.22
NM_164820|Akap200|chr2L|+	1	0.78	-0.22
NM_143581|l(3)03670|chr3R|-	0.92	0.7	-0.22
NM_141001|CG4365|chr3L|+	0.98	0.76	-0.22
NM_137640|CG18067|chr2R|+	0.94	0.72	-0.22
NM_058006|Hop|chr2L|+	0.35	0.13	-0.22
NM_057246|ifc|chr2L|+	0.74	0.52	-0.22
NM_164762|Tep2|chr2L|-	0.94	0.72	-0.22
NM_079640|FK506-bp1|chr3R|-	0.65	0.43	-0.22
NM_135960|CG17331|chr2L|-	0.65	0.43	-0.22
NM_135556|CG5168|chr2L|+	0.83	0.61	-0.22
NM_142342|CG31265|chr3R|+	0.87	0.65	-0.22
NM_001274250|CG9380|chr2R|-	0.72	0.5	-0.22
NM_001259302|Etf-QO|chr2R|+	0.8	0.58	-0.22
NM_001273350|CG9586|chr2L|-	0.46	0.24	-0.22
NM_080017|Uba2|chr3L|-	0.91	0.69	-0.22
NM_136811|Cpr47Eb|chr2R|+	0.91	0.69	-0.22
NM_135509|CG5734|chr2L|-	1	0.78	-0.22
NM_001273410|mRpS7|chr2L|+	0.71	0.49	-0.22
NM_001272895|crq|chr2L|-	0.9	0.68	-0.22
NM_143413|CG11880|chr3R|+	1	0.78	-0.22
NM_137042|Roe1|chr2R|+	0.79	0.57	-0.22
NM_001169657|nemy|chr2R|-	0.76	0.54	-0.22
NM_135208|CG11050|chr2L|+	0.76	0.54	-0.22
NM_145335|mthl3|chr2R|-	0.67	0.45	-0.22
NM_001015254|CG17168|chrXHet|+	1	0.78	-0.22
NM_078610|Arp6|chrX|-	1	0.78	-0.22
NM_142241|Arpc3A|chr3R|+	0.66	0.44	-0.22
NM_137989|Nxt1|chr2R|-	0.55	0.33	-0.22
NM_136779|nclb|chr2R|+	0.89	0.67	-0.22
NM_143761|Cyp6a17|chr2R|+	0.63	0.41	-0.22
NM_001260202|msps|chr3R|+	1	0.78	-0.22
NM_167124|CG1677|chrX|-	0.87	0.65	-0.22
NM_136273|Cul-2|chr2L|+	0.61	0.39	-0.22
NM_139378|CG13928|chr3L|-	0.98	0.76	-0.22
NM_057812|Lis-1|chr2R|+	0.51	0.29	-0.22
NM_001202155|CG42671|chr3L|+	0.38	0.16	-0.22
NM_142648|Cpr92F|chr3R|+	0.97	0.75	-0.22
NM_141475|pyd3|chr3R|-	0.37	0.15	-0.22
NM_001274557|CG10103|chr3L|-	0.44	0.22	-0.22
NM_001274942|Pex3|chr3L|+	0.73	0.51	-0.22
NM_135753|CG9934|chr2L|-	0.51	0.29	-0.22
NM_136425|CG11107|chr2R|+	0.61	0.39	-0.22
NM_143073|veli|chr3R|-	0.45	0.23	-0.22
NM_142705|CG5919|chr3R|+	0.63	0.41	-0.22
NM_142529|CG11779|chr3R|-	0.79	0.57	-0.22
NM_176271|CG2469|chr3L|+	0.6	0.38	-0.22
NM_001014633|Rpb4|chr3R|-	0.28	0.06	-0.22
NM_001275070|cln3|chr3L|-	0.79	0.57	-0.22
NM_001274356|CG13933|chr3L|-	1	0.78	-0.22
NM_176344|CG33051|chr3L|-	0.72	0.5	-0.22
NM_169774|CG31249|chr3R|-	0.77	0.55	-0.22
NM_079199|TfIIEbeta|chr3L|+	0.6	0.38	-0.22
NM_137701|CG4030|chr2R|-	1	0.78	-0.22
NM_167521|hang|chrX|+	0.41	0.19	-0.22
NM_001273908|cbx|chr2R|-	0.32	0.1	-0.22
NM_001275743|SF1|chr3R|+	0.41	0.19	-0.22
NM_138046|Zfrp8|chr2R|+	0.73	0.51	-0.22
NM_137059|CG13339|chr2R|+	0.59	0.37	-0.22
NR_073684|CR44060|chr2L|+	0.74	0.52	-0.22
NM_170194|CG31109|chr3R|-	0.62	0.4	-0.22
NM_143511|CG7946|chr3R|+	0.46	0.24	-0.22
NM_137795|CG6613|chr2R|+	0.52	0.3	-0.22
NM_140084|CG18180|chr3L|+	0.99	0.78	-0.21
NM_079895|Rfabg|chr4|+	0.86	0.65	-0.21
NM_001276037|RpL27|chr3R|-	0.52	0.31	-0.21
NM_080063|Fer2LCH|chr3R|+	0.8	0.59	-0.21
NM_080188|Hsp70Bb|chr3R|+	0.88	0.67	-0.21
NM_140933|CG7017|chr3L|-	0.96	0.75	-0.21
NM_080173|GstD2|chr3R|+	1	0.79	-0.21
NM_141790|SdhC|chr3R|-	1	0.79	-0.21
NM_057431|Uro|chr2L|+	0.5	0.29	-0.21
NM_140648|CG4169|chr3L|+	0.91	0.7	-0.21
NM_001274929|CG18649|chr3L|-	0.39	0.18	-0.21
NM_057908|Idgf3|chr2L|+	0.94	0.73	-0.21
NM_079212|DnaJ-1|chr3L|-	1	0.79	-0.21
NM_058112|Akap200|chr2L|+	1	0.79	-0.21
NM_142745|CG6028|chr3R|-	0.81	0.6	-0.21
NM_170204|vig2|chr3R|+	0.9	0.69	-0.21
NM_170206|vig2|chr3R|+	0.85	0.64	-0.21
NM_136267|Lamp1|chr2L|+	0.56	0.35	-0.21
NM_168873|CG4365|chr3L|+	0.98	0.77	-0.21
NM_135339|CG12375|chr2L|-	1	0.79	-0.21
NM_142674|CG10827|chr3R|-	0.51	0.3	-0.21
NM_001272998|Rab5|chr2L|-	0.88	0.67	-0.21
NM_138200|Gale|chr3L|+	0.85	0.64	-0.21
NM_140560|CG17032|chr3L|+	1	0.79	-0.21
NM_139521|CG14963|chr3L|-	0.74	0.53	-0.21
NM_130496|Roc1a|chrX|+	0.71	0.5	-0.21
NM_144370|Ugt36Bc|chr2L|+	0.93	0.72	-0.21
NM_057914|Amyrel|chr2R|-	0.76	0.55	-0.21
NM_143729|Lk6|chr3R|-	0.59	0.38	-0.21
NM_140489|Aats-gly|chr3L|+	1	0.79	-0.21
NM_058061|ApepP|chr2L|-	0.94	0.73	-0.21
NM_079047|robl|chr2R|+	0.39	0.18	-0.21
NM_130503|CG13360|chrX|-	0.57	0.36	-0.21
NM_080097|beta'Cop|chr2L|+	0.93	0.72	-0.21
NM_144401|mRpL36|chr3L|-	1	0.79	-0.21
NM_139642|CG15019|chr3L|-	0.43	0.22	-0.21
NM_001260395|CG31075|chr3R|-	0.69	0.48	-0.21
NM_001274045|LamC|chr2R|-	0.97	0.76	-0.21
NM_080054|mys|chrX|+	0.4	0.19	-0.21
NM_141271|CG1161|chr3R|+	0.48	0.27	-0.21
NM_079541|alpha-Est5|chr3R|-	0.86	0.65	-0.21
NM_165398|CG1416|chr2L|+	0.54	0.33	-0.21
NM_001031920|Kaz1-ORFB|chr3L|+	0.38	0.17	-0.21
NM_143630|nero|chr3R|-	1	0.79	-0.21
NM_079393|Mo25|chr3L|-	0.89	0.68	-0.21
NM_135946|CG4278|chr2L|+	1	0.79	-0.21
NM_164659|obst-E|chr2L|-	1	0.79	-0.21
NM_137127|CG12868|chr2R|-	0.63	0.42	-0.21
NM_137509|CG5482|chr2R|-	0.65	0.44	-0.21
NM_001274435|ZnT63C|chr3L|+	0.95	0.74	-0.21
NM_139370|CG12004|chr3L|+	0.73	0.52	-0.21
NM_142074|Npc2b|chr3R|+	0.73	0.52	-0.21
NM_058013|p38b|chr2L|+	0.82	0.61	-0.21
NM_140839|Bet1|chr3L|+	0.56	0.35	-0.21
NM_167435|Top1|chrX|+	0.75	0.54	-0.21
NM_167094|pod1|chrX|+	1	0.79	-0.21
NM_001103427|pod1|chrX|+	1	0.79	-0.21
NM_080128|Bka|chr2L|+	1	0.79	-0.21
NM_079653|Bin1|chr3R|-	0.63	0.42	-0.21
NM_137697|mRpL54|chr2R|+	0.43	0.22	-0.21
NM_137568|CG9975|chr2R|+	1	0.79	-0.21
NM_143572|Cpr100A|chr3R|+	0.71	0.5	-0.21
NM_001169608|CG8726|chr2R|-	1	0.79	-0.21
NM_001272624|Flo-2|chrX|+	0.5	0.29	-0.21
NM_001201744|Tao|chrX|-	0.66	0.45	-0.21
NM_001275731|m-cup|chr3R|-	0.28	0.07	-0.21
NM_134916|CG9663|chr2L|-	0.98	0.77	-0.21
NM_001169496|CG9934|chr2L|-	0.57	0.36	-0.21
NM_001014611|bocksbeutel|chr3R|-	0.81	0.6	-0.21
NM_141557|CG8043|chr3R|+	0.89	0.68	-0.21
NM_165168|CG42389|chr2L|+	1	0.79	-0.21
NM_001144357|CG42389|chr2L|+	1	0.79	-0.21
NM_001170145|CG42542|chr3R|+	0.79	0.58	-0.21
NM_133068|CG6361|chrX|-	0.45	0.24	-0.21
NM_137063|CG6357|chr2R|+	0.5	0.29	-0.21
NM_134824|CG16995|chr2L|+	0.49	0.28	-0.21
NM_057604|Map60|chr2R|+	0.86	0.65	-0.21
NM_136747|trsn|chr2R|-	0.54	0.33	-0.21
NM_057682|cin|chrX|+	0.38	0.17	-0.21
NM_168825|Prp3|chr3L|+	0.78	0.57	-0.21
NM_001201955|Lpin|chr2R|-	0.85	0.64	-0.21
NM_132075|CG3781|chrX|+	0.67	0.46	-0.21
NM_137201|CG8187|chr2R|-	0.66	0.45	-0.21
NM_001273497|Vha68-1|chr2L|-	0.59	0.38	-0.21
NM_001272734|CG6769|chrX|+	0.5	0.29	-0.21
NM_142404|CG7357|chr3R|-	0.64	0.43	-0.21
NM_001110982|Parp|chr3RHet|+	0.83	0.62	-0.21
NM_001144272|St3|chr2R|+	0.64	0.43	-0.21
NM_001274330|CG12090|chr3L|-	0.85	0.64	-0.21
NM_142956|CG18428|chr3R|+	0.36	0.15	-0.21
NM_001275436|CG10903|chr3R|+	0.36	0.15	-0.21
NM_001260224|sll|chr3R|+	0.35	0.14	-0.21
NM_138012|thoc5|chr2R|+	0.48	0.27	-0.21
NM_078805|Dref|chr2L|-	0.44	0.23	-0.21
NM_001275291|SPoCk|chr3L|+	0.64	0.43	-0.21
NM_001169557|Dap160|chr2L|-	0.49	0.28	-0.21
NM_133136|Mur18B|chrX|+	1	0.8	-0.2
NM_137186|CG8157|chr2R|-	0.55	0.35	-0.2
NM_167998|CG32276|chr3L|-	0.69	0.49	-0.2
NM_079044|Amy-d|chr2R|+	0.53	0.33	-0.2
NM_139977|GstO3|chr3L|+	1	0.8	-0.2
NM_169841|Xrp1|chr3R|+	0.88	0.68	-0.2
NM_135517|eEF1delta|chr2L|+	0.77	0.57	-0.2
NM_135423|CG9568|chr2L|+	0.32	0.12	-0.2
NM_079822|Pglym78|chr3R|+	0.6	0.4	-0.2
NM_141306|CG12171|chr3R|+	0.87	0.67	-0.2
NM_168767|CG32198|chr3L|+	0.41	0.21	-0.2
NM_168994|lost|chr3R|+	0.73	0.53	-0.2
NM_079833|Nlp|chr3R|+	0.66	0.46	-0.2
NM_134971|CG15423|chr2L|+	0.65	0.45	-0.2
NM_001169367|galectin|chr2L|+	1	0.8	-0.2
NM_001014614|pug|chr3R|+	0.46	0.26	-0.2
NM_167463|CG8974|chrX|-	0.51	0.31	-0.2
NM_080214|Spn55B|chr2R|+	0.55	0.35	-0.2
NM_001273582|CG17331|chr2L|-	0.52	0.32	-0.2
NM_168064|ens|chr3L|-	1	0.8	-0.2
NM_169663|CG44014|chr3R|-	0.76	0.56	-0.2
NM_001273380|CG5853|chr2L|-	0.28	0.08	-0.2
NM_001042981|CG17486|chr2R|+	1	0.8	-0.2
NM_144477|He|chr2L|-	0.49	0.29	-0.2
NM_136266|CG17570|chr2L|-	1	0.8	-0.2
NM_168678|Baldspot|chr3L|-	0.82	0.62	-0.2
NM_001272933|CG43348|chr2L|+	0.24	0.04	-0.2
NR_074058|CR44021|chr3R|-	1	0.8	-0.2
NM_142283|CG17565|chr3R|+	0.24	0.04	-0.2
NM_176561|CG33095|chr3R|+	1	0.8	-0.2
NM_140525|CG12304|chr3L|+	0.73	0.53	-0.2
NM_080171|RpII18|chr3R|+	0.77	0.57	-0.2
NM_169330|tws|chr3R|-	0.84	0.64	-0.2
NM_166469|CG42365|chr2R|+	1	0.8	-0.2
NM_137756|CG9865|chr2R|-	0.84	0.64	-0.2
NM_058091|Trap1|chr2R|-	0.3	0.1	-0.2
NM_169331|tws|chr3R|-	0.83	0.63	-0.2
NM_138108|CG3663|chr2R|+	0.48	0.28	-0.2
NM_001275406|gfzf|chr3R|-	0.86	0.66	-0.2
NM_170231|Npl4|chr3R|-	0.38	0.18	-0.2
NM_138021|CG3860|chr2R|-	0.6	0.4	-0.2
NM_001043255|Dhfr|chr3R|+	0.47	0.27	-0.2
NM_001169832|Vdup1|chr3L|-	0.26	0.06	-0.2
NM_167448|CG6340|chrX|+	0.27	0.07	-0.2
NM_143339|CG4980|chr3R|-	0.97	0.77	-0.2
NM_001260170|RpII15|chr3R|+	0.8	0.6	-0.2
NM_001144657|sima|chr3R|+	0.46	0.26	-0.2
NM_001042995|CG12547|chr2R|-	0.76	0.56	-0.2
NM_167250|Imp|chrX|-	0.97	0.77	-0.2
NM_001170197|Mvl|chr3R|-	0.33	0.13	-0.2
NM_057922|Pi3K21B|chr2L|+	0.64	0.44	-0.2
NM_142338|kuk|chr3R|+	0.86	0.66	-0.2
NM_169849|CG11779|chr3R|-	0.66	0.46	-0.2
NM_137913|RpL37b|chr2R|-	0.48	0.28	-0.2
NM_137061|CG6337|chr2R|-	0.88	0.68	-0.2
NM_001258583|Mnt|chrX|+	0.78	0.58	-0.2
NM_165887|CG30047|chr2R|+	0.6	0.4	-0.2
NM_168861|CG32425|chr3L|+	0.81	0.61	-0.2
NM_001169606|CG1399|chr2R|-	0.58	0.38	-0.2
NM_001275956|Nup98-96|chr3R|-	0.82	0.62	-0.2
NM_176557|mask|chr3R|+	0.76	0.56	-0.2
NM_168534|RpS12|chr3L|+	0.43	0.24	-0.19
NM_057590|RpS13|chr2L|-	0.62	0.43	-0.19
NM_143778|l(2)06225|chr2L|-	0.88	0.69	-0.19
NM_169469|Hsp70Ba|chr3R|-	0.72	0.53	-0.19
NM_132836|CG8206|chrX|+	1	0.81	-0.19
NM_135326|CG7224|chr2L|+	0.61	0.42	-0.19
NM_001202181|mex1|chr3L|-	0.87	0.68	-0.19
NM_137718|Glycogenin|chr2R|+	0.56	0.37	-0.19
NM_143446|CG1907|chr3R|+	0.87	0.68	-0.19
NM_130655|CG8636|chrX|-	0.65	0.46	-0.19
NM_001144202|ATPCL|chr2R|-	0.28	0.09	-0.19
NM_168158|Cpr65Av|chr3L|-	0.28	0.09	-0.19
NM_176301|ergic53|chr3L|+	0.59	0.4	-0.19
NM_143628|CG1890|chr3R|+	0.32	0.13	-0.19
NM_001274239|Mov34|chr2R|+	0.88	0.69	-0.19
NM_137919|CG13545|chr2R|-	0.55	0.36	-0.19
NM_001275916|Gclm|chr3R|-	0.4	0.21	-0.19
NM_165676|ced-6|chr2R|-	0.97	0.78	-0.19
NM_143656|CG1674|chr4|+	0.76	0.57	-0.19
NM_001272424|CG2004|chrX|-	1	0.81	-0.19
NM_001272428|CG2004|chrX|-	1	0.81	-0.19
NM_135433|CG9586|chr2L|-	0.4	0.21	-0.19
NM_001014455|PNUTS|chr2L|+	0.99	0.8	-0.19
NM_140995|Pex16|chr3L|-	1	0.81	-0.19
NM_141512|Gie|chr3R|+	0.36	0.17	-0.19
NM_080107|e(y)2|chrX|-	0.98	0.79	-0.19
NM_001103686|CG44085|chr2L|+	0.25	0.06	-0.19
NM_142170|Spn88Eb|chr3R|-	0.7	0.51	-0.19
NM_057720|cni|chr2L|-	0.38	0.19	-0.19
NM_134933|Snx1|chr2L|+	0.32	0.13	-0.19
NR_073978|CR44134|chr3R|+	1	0.81	-0.19
NM_141695|CG9467|chr3R|-	0.99	0.8	-0.19
NM_138107|CG4781|chr2R|-	0.66	0.47	-0.19
NM_132238|sni|chrX|-	0.94	0.75	-0.19
NM_058133|ligatin|chr3R|-	1	0.81	-0.19
NM_001032039|CG33095|chr3R|+	1	0.81	-0.19
NM_166674|Letm1|chr2R|-	0.86	0.67	-0.19
NM_001103718|CG42748|chr2L|+	1	0.81	-0.19
NM_001202034|CG43164|chr2R|+	0.94	0.75	-0.19
NM_170359|CG5508|chr3R|+	0.71	0.52	-0.19
NM_130590|CG14812|chrX|-	0.75	0.56	-0.19
NM_130692|CG3939|chrX|+	0.61	0.42	-0.19
NM_079619|poly|chr3R|-	0.67	0.48	-0.19
NM_001170234|CG5902|chr3R|+	0.85	0.66	-0.19
NM_079461|mRpL15|chr3L|-	0.76	0.57	-0.19
NM_139635|CG15014|chr3L|-	1	0.81	-0.19
NM_167579|CG15814|chrX|-	0.5	0.31	-0.19
NM_168789|Bet1|chr3L|+	0.49	0.3	-0.19
NM_169355|CG31373|chr3R|-	0.62	0.43	-0.19
NM_001104522|heph|chr3R|-	0.38	0.19	-0.19
NM_058100|Stam|chr2L|+	0.77	0.58	-0.19
NM_206767|CG9132|chrX|-	0.32	0.13	-0.19
NM_080273|Tsp42Ea|chr2R|+	0.49	0.3	-0.19
NM_167570|l(1)G0222|chrX|-	1	0.81	-0.19
NM_001104277|cu|chr3R|+	0.49	0.3	-0.19
NM_140149|CG8003|chr3L|+	0.84	0.65	-0.19
NM_170344|Mtl|chr3R|+	1	0.81	-0.19
NM_001144155|Updo|chr2R|+	0.67	0.48	-0.19
NM_166372|hrg|chr2R|-	0.28	0.09	-0.19
NM_079080|MESK2|chr2R|+	0.43	0.24	-0.19
NM_141040|pzg|chr3L|+	0.36	0.17	-0.19
NM_168181|Prat2|chr3L|-	0.73	0.54	-0.19
NM_130623|CG4025|chrX|+	0.87	0.68	-0.19
NM_168589|CG9238|chr3L|-	0.55	0.36	-0.19
NM_130637|CG3071|chrX|+	1	0.81	-0.19
NM_001275881|tsl|chr3R|-	0.79	0.6	-0.19
NM_001273465|CycY|chr2L|-	0.59	0.4	-0.19
NM_165368|Mio|chr2L|-	0.7	0.51	-0.19
NM_143039|CG7006|chr3R|+	0.73	0.54	-0.19
NM_166430|Pu|chr2R|+	0.47	0.28	-0.19
NM_143639|CG2118|chr3R|-	0.52	0.33	-0.19
NM_139525|CG14958|chr3L|+	0.76	0.57	-0.19
NM_001259385|AGO1|chr2R|-	0.53	0.34	-0.19
NM_143129|CHKov1|chr3R|-	0.71	0.52	-0.19
NM_135646|CG6230|chr2L|-	0.48	0.29	-0.19
NM_137583|hpo|chr2R|-	0.86	0.67	-0.19
NM_176731|CG33178|chrX|+	0.59	0.4	-0.19
NM_137334|CG6805|chr2R|+	0.84	0.65	-0.19
NM_130516|CG3704|chrX|-	0.4	0.21	-0.19
NM_001276209|spn-F|chr3R|+	0.8	0.61	-0.19
NM_137229|CG8370|chr2R|+	0.95	0.76	-0.19
NM_165729|CG1407|chr2R|-	0.66	0.47	-0.19
NM_132539|Upf1|chrX|-	0.73	0.54	-0.19
NM_057950|Cht2|chr3L|-	0.7	0.51	-0.19
NM_143336|CG5003|chr3R|-	0.92	0.73	-0.19
NM_170033|loco|chr3R|-	0.81	0.62	-0.19
NM_137255|CG15706|chr2R|-	0.8	0.61	-0.19
NM_139926|ERR|chr3L|-	0.84	0.65	-0.19
NM_001274160|CG10062|chr2R|+	0.35	0.16	-0.19
NM_141551|CG8021|chr3R|+	0.45	0.26	-0.19
NM_001038775|CG4822|chr2L|-	0.8	0.61	-0.19
NM_001259109|CG3793|chr2L|+	0.43	0.24	-0.19
NM_058084|Taz|chr2R|-	0.39	0.2	-0.19
NM_169063|Pi4KIIalpha|chr3R|-	0.58	0.39	-0.19
NM_001042856|Rab21|chrX|-	0.57	0.38	-0.19
NM_001259854|Mbs|chr3L|+	0.42	0.23	-0.19
NM_176148|CG33145|chr2R|-	0.89	0.7	-0.19
NM_001201725|CG5004|chrX|+	0.62	0.43	-0.19
NM_080069|Ef1beta|chr2R|+	1	0.82	-0.18
NM_080145|RpS14a|chrX|+	0.45	0.27	-0.18
NM_165744|14-3-3zeta|chr2R|+	0.51	0.33	-0.18
NR_048206|CR42862|chr3L|+	0.99	0.81	-0.18
NM_132921|CG9673|chrX|-	0.83	0.65	-0.18
NM_080243|Peritrophin-15b|chr2L|-	0.72	0.54	-0.18
NM_135872|CG15282|chr2L|+	0.25	0.07	-0.18
NM_166217|GstS1|chr2R|-	0.9	0.72	-0.18
NM_079545|alpha-Est1|chr3R|-	1	0.82	-0.18
NM_001202268|skap|chr3R|+	0.47	0.29	-0.18
NM_001031914|CG33713|chrX|-	1	0.82	-0.18
NM_137508|Eip55E|chr2R|+	0.93	0.75	-0.18
NM_080148|Gtp-bp|chrX|-	1	0.82	-0.18
NM_078551|Gip|chrX|-	0.8	0.62	-0.18
NM_078808|Pros35|chr2L|+	0.53	0.35	-0.18
NM_001103606|CG34176|chr2L|+	0.83	0.65	-0.18
NM_001274938|Aats-gly|chr3L|+	1	0.82	-0.18
NM_135275|CG5958|chr2L|-	0.4	0.22	-0.18
NM_144309|CG14933|chr2L|+	0.31	0.13	-0.18
NM_001276223|sip3|chr3R|+	1	0.82	-0.18
NM_135469|IP3K1|chr2L|+	0.81	0.63	-0.18
NM_001275156|Tom20|chr3L|+	0.45	0.27	-0.18
NM_078733|Rab5|chr2L|-	0.69	0.51	-0.18
NM_140758|CG5567|chr3L|-	0.92	0.74	-0.18
NM_134972|CG43774|chr2L|+	0.72	0.54	-0.18
NM_078695|Rab10|chrX|+	0.45	0.27	-0.18
NM_057769|Cyp4e2|chr2R|+	0.52	0.34	-0.18
NM_141255|CG12007|chr3R|+	1	0.82	-0.18
NM_140534|comm3|chr3L|-	0.99	0.81	-0.18
NM_141270|CG11999|chr3R|-	0.75	0.57	-0.18
NM_001043225|CG34117|chr3R|-	0.38	0.2	-0.18
NM_001273126|CG2950|chr2L|-	0.32	0.14	-0.18
NM_143932|CG11985|chr3R|-	0.77	0.59	-0.18
NM_140331|nst|chr3L|-	0.33	0.15	-0.18
NM_142944|CG5902|chr3R|+	0.85	0.67	-0.18
NM_166783|gw|chr4|-	0.32	0.14	-0.18
NM_137502|CG5323|chr2R|+	0.44	0.26	-0.18
NR_074056|CR44097|chr3R|+	0.42	0.24	-0.18
NM_079916|Gyk|chr3L|-	0.3	0.12	-0.18
NM_139835|mRpL50|chr3L|-	0.86	0.68	-0.18
NM_001201916|Lectin-galC1|chr2L|+	0.66	0.48	-0.18
NM_001104138|CG10006|chr3L|+	0.84	0.66	-0.18
NM_169575|RpII15|chr3R|+	0.82	0.64	-0.18
NM_001042986|Nipped-B|chr2R|-	0.27	0.09	-0.18
NM_137997|CG5597|chr2R|+	0.41	0.23	-0.18
NM_168172|CG8368|chr3L|+	0.92	0.74	-0.18
NM_079631|mRpS10|chr3R|+	0.45	0.27	-0.18
NM_001169561|Mio|chr2L|-	0.69	0.51	-0.18
NM_144208|CG15210|chrX|+	0.33	0.15	-0.18
NM_137495|GstE11|chr2R|+	0.6	0.42	-0.18
NM_079684|Surf6|chr3R|-	0.93	0.75	-0.18
NM_001275720|CG18622|chr3R|-	0.98	0.8	-0.18
NM_001259690|Cip4|chr3L|-	0.89	0.71	-0.18
NM_001014528|CG33506|chr2R|-	0.82	0.64	-0.18
NM_166021|AGO1|chr2R|-	0.52	0.34	-0.18
NM_001274323|CG2199|chr3L|-	1	0.82	-0.18
NM_141355|Obp83cd|chr3R|+	0.38	0.2	-0.18
NM_001275880|E2f|chr3R|-	0.64	0.46	-0.18
NM_001104092|MTF-1|chr3L|+	0.87	0.69	-0.18
NM_001104090|MTF-1|chr3L|+	0.87	0.69	-0.18
NM_142700|CG3337|chr3R|-	0.76	0.58	-0.18
NM_135601|Dpy-30L1|chr2L|+	0.66	0.48	-0.18
NM_001202235|tub|chr3R|+	0.83	0.65	-0.18
NM_001260380|gro|chr3R|+	0.71	0.53	-0.18
NM_206116|CG7639|chr2R|-	0.87	0.69	-0.18
NM_132343|Gga|chrX|+	0.43	0.25	-0.18
NM_168170|CG18769|chr3L|+	0.82	0.64	-0.18
NM_001273502|DnaJ-H|chr2L|-	0.67	0.49	-0.18
NM_165625|stmA|chr2R|-	0.53	0.35	-0.18
NM_143460|CG7601|chr3R|-	0.52	0.34	-0.18
NM_078637|vap|chrX|-	0.26	0.08	-0.18
NM_001273379|CG31712|chr2L|-	0.53	0.35	-0.18
NM_176062|fs(2)ltoPP43|chr2L|-	0.46	0.28	-0.18
NM_137132|CG10139|chr2R|+	0.68	0.5	-0.18
NM_168033|Eip63E|chr3L|+	0.74	0.56	-0.18
NM_164973|CG31704|chr2L|+	0.87	0.69	-0.18
NM_132489|Sk1|chrX|+	0.87	0.69	-0.18
NM_167286|Sk1|chrX|+	0.87	0.69	-0.18
NM_134791|CG7289|chr2L|+	0.33	0.15	-0.18
NM_001202259|Zif|chr3R|+	0.45	0.27	-0.18
NM_176290|Lcp65Ae|chr3L|-	0.23	0.06	-0.17
NM_135409|CG9468|chr2L|-	0.82	0.65	-0.17
NM_001272934|CG43349|chr2L|+	0.3	0.13	-0.17
NM_132882|CG3560|chrX|+	0.59	0.42	-0.17
NM_137442|CG10911|chr2R|-	0.76	0.59	-0.17
NM_143756|cathD|chr2R|-	0.31	0.14	-0.17
NM_142607|CG4390|chr3R|-	0.96	0.79	-0.17
NM_001259134|CG6453|chr2L|-	1	0.83	-0.17
NM_079130|Lcp9|chr2R|-	0.55	0.38	-0.17
NM_144369|Ugt86Da|chr3R|+	1	0.83	-0.17
NM_169751|CG31267|chr3R|+	1	0.83	-0.17
NM_167001|cib|chrX|+	0.45	0.28	-0.17
NM_167002|cib|chrX|+	0.45	0.28	-0.17
NM_078861|VhaSFD|chr2L|-	0.48	0.31	-0.17
NM_170034|Gclm|chr3R|-	0.88	0.71	-0.17
NM_142848|CG17244|chr3R|+	0.75	0.58	-0.17
NM_144243|CG13364|chrX|-	0.57	0.4	-0.17
NM_165075|nimB2|chr2L|-	0.62	0.45	-0.17
NM_167351|CG32640|chrX|+	0.61	0.44	-0.17
NM_164918|CG5096|chr2L|+	0.64	0.47	-0.17
NM_142246|Hmt-1|chr3R|-	1	0.83	-0.17
NM_001202202|asf1|chr3L|+	1	0.83	-0.17
NM_001259660|CG12082|chr3L|-	1	0.83	-0.17
NM_166039|CG8468|chr2R|+	0.78	0.61	-0.17
NR_073632|roX1|chrX|-	0.87	0.7	-0.17
NM_141844|CG14715|chr3R|+	0.44	0.27	-0.17
NM_142921|RanBP3|chr3R|-	0.96	0.79	-0.17
NM_001275952|RanBP3|chr3R|-	0.96	0.79	-0.17
NM_079540|alphaTub84D|chr3R|+	0.62	0.45	-0.17
NM_137581|TBCB|chr2R|-	0.31	0.14	-0.17
NM_001042931|CG17493|chr2L|+	0.6	0.43	-0.17
NM_001170313|gammaCop|chr3R|+	0.68	0.51	-0.17
NM_169012|CG9775|chr3R|-	0.55	0.38	-0.17
NM_141686|CG9471|chr3R|-	0.85	0.68	-0.17
NM_001276016|CG11791|chr3R|+	0.4	0.23	-0.17
NM_001273119|CG2976|chr2L|-	0.31	0.14	-0.17
NM_130567|rush|chrX|+	0.51	0.34	-0.17
NM_134747|CG5397|chr2L|+	0.89	0.72	-0.17
NM_001276230|CG41378|chr2RHet|-	0.27	0.1	-0.17
NM_001170307|CG2246|chr3R|-	0.53	0.36	-0.17
NM_001259847|Dcp2|chr3L|-	0.9	0.73	-0.17
NM_142706|CG3308|chr3R|-	0.61	0.44	-0.17
NM_165423|Atf6|chr2R|+	0.88	0.71	-0.17
NM_206023|Atf6|chr2R|+	0.88	0.71	-0.17
NM_137462|CG5721|chr2R|-	0.75	0.58	-0.17
NM_001103386|RhoGAP1A|chrX|+	0.86	0.69	-0.17
NM_170576|faf|chr3R|+	0.92	0.75	-0.17
NM_135067|Cyp28d2|chr2L|+	0.27	0.1	-0.17
NM_137949|CG9812|chr2R|-	0.38	0.21	-0.17
NM_001258691|CG34348|chrX|+	0.97	0.8	-0.17
NM_168493|Adk1|chr3L|-	0.41	0.24	-0.17
NM_001273625|mib2|chr2L|+	1	0.83	-0.17
NM_165882|Den1|chr2R|+	0.77	0.6	-0.17
NM_165566|CG18853|chr2R|+	0.52	0.35	-0.17
NM_001273301|CG8475|chr2L|-	0.36	0.19	-0.17
NM_001015122|rl|chr2RHet|+	0.6	0.43	-0.17
NM_001104326|CG6966|chr3R|-	0.86	0.69	-0.17
NM_057876|Dhod|chr3R|-	0.8	0.63	-0.17
NM_001276022|CG31102|chr3R|-	0.29	0.12	-0.17
NM_058072|Rep|chr2R|+	0.24	0.07	-0.17
NM_057472|Vinc|chrX|-	0.85	0.68	-0.17
NM_141048|CG7324|chr3L|-	0.85	0.68	-0.17
NM_001259904|Max|chr3L|-	0.77	0.6	-0.17
NM_143094|CG13663|chr3R|-	0.31	0.14	-0.17
NM_139439|CG15820|chr3L|-	0.88	0.71	-0.17
NM_167520|hang|chrX|+	0.32	0.15	-0.17
NM_142231|CG9590|chr3R|+	0.7	0.53	-0.17
NM_144353|Spt5|chr2R|+	0.6	0.43	-0.17
NM_057603|140up|chr3R|-	0.92	0.75	-0.17
NM_139552|CG14969|chr3L|-	0.39	0.22	-0.17
NM_132013|Sirt4|chrX|-	0.86	0.69	-0.17
NM_001273965|CG7763|chr2R|+	0.42	0.25	-0.17
NM_136091|Acn|chr2L|+	0.58	0.41	-0.17
NM_136852|CG13197|chr2R|+	0.44	0.27	-0.17
NM_165218|dl|chr2L|-	0.76	0.59	-0.17
NM_001258997|Rab30|chr2L|-	0.69	0.52	-0.17
NM_170434|CG31033|chr3R|-	0.38	0.21	-0.17
NM_134504|CG14232|chrX|-	1	0.83	-0.17
NM_164955|RpL9|chr2L|-	0.75	0.59	-0.16
NM_139825|CG15829|chr3L|+	0.4	0.24	-0.16
NM_135592|CG7299|chr2L|-	1	0.84	-0.16
NM_170101|Gdh|chr3R|-	0.82	0.66	-0.16
NM_078967|zetaTry|chr2R|-	1	0.84	-0.16
NM_139720|CG5150|chr3L|+	1	0.84	-0.16
NM_176588|Tpi|chr3R|-	0.83	0.67	-0.16
NM_080321|ng3|chrX|-	0.86	0.7	-0.16
NM_137484|GstE6|chr2R|+	0.98	0.82	-0.16
NM_136160|CG13962|chr2L|-	1	0.84	-0.16
NM_001275790|Xrp1|chr3R|+	0.82	0.66	-0.16
NM_001273053|CG17259|chr2L|-	1	0.84	-0.16
NM_057512|Pgd|chrX|+	0.89	0.73	-0.16
NM_166868|TRAM|chrX|+	0.87	0.71	-0.16
NM_078907|Tsp42Ee|chr2R|+	0.49	0.33	-0.16
NM_001274576|CG8602|chr3L|-	1	0.84	-0.16
NM_079959|bgm|chr2L|+	0.73	0.57	-0.16
NM_169253|CG11984|chr3R|-	1	0.84	-0.16
NM_165699|hebe|chr2R|-	0.78	0.62	-0.16
NM_079473|ppl|chr3L|-	0.62	0.46	-0.16
NM_001169598|CG30159|chr2R|+	1	0.84	-0.16
NM_132838|Tcp-1zeta|chrX|+	0.94	0.78	-0.16
NM_168438|l(3)01239|chr3L|-	0.63	0.47	-0.16
NM_001169713|Mapmodulin|chr2R|-	0.8	0.64	-0.16
NM_139632|CG1319|chr3L|+	0.81	0.65	-0.16
NM_135080|CG12512|chr2L|-	0.26	0.1	-0.16
NM_001274727|CG43897|chr3L|+	0.64	0.48	-0.16
NM_141659|P58IPK|chr3R|+	0.84	0.68	-0.16
NM_079537|alpha-Est7|chr3R|-	0.54	0.38	-0.16
NM_001274000|Nmda1|chr2R|-	0.42	0.26	-0.16
NM_142801|CG5346|chr3R|-	0.23	0.07	-0.16
NM_001272168|CG3176|chrX|+	1	0.84	-0.16
NM_001201738|CG6762|chrX|+	0.75	0.59	-0.16
NM_079022|AttB|chr2R|+	0.5	0.34	-0.16
NM_001273805|Eb1|chr2R|+	0.49	0.33	-0.16
NM_057730|sw|chrX|-	0.54	0.38	-0.16
NM_165776|CG11777|chr2R|+	1	0.84	-0.16
NM_136557|CG8635|chr2R|-	0.7	0.54	-0.16
NM_001260427|alph|chr3R|+	0.56	0.4	-0.16
NM_137348|Cda9|chr2R|+	0.65	0.49	-0.16
NM_134653|CG11454|chr2L|+	0.96	0.8	-0.16
NM_169302|Unc-115b|chr3R|-	0.62	0.46	-0.16
NM_166623|egl|chr2R|-	1	0.84	-0.16
NM_143400|beta4GalNAcTB|chr3R|-	1	0.84	-0.16
NM_136961|CG8778|chr2R|-	0.75	0.59	-0.16
NM_134958|CG10031|chr2L|-	0.38	0.22	-0.16
NM_169435|glo|chr3R|-	0.89	0.73	-0.16
NM_141167|CG11137|chr3L|-	0.65	0.49	-0.16
NM_132853|Aats-arg|chrX|-	0.89	0.73	-0.16
NM_170415|CG31041|chr3R|-	0.31	0.15	-0.16
NM_144355|SC35|chr2L|-	0.68	0.52	-0.16
NM_135480|CG4592|chr2L|+	0.68	0.52	-0.16
NM_001275835|Sep2|chr3R|-	0.78	0.62	-0.16
NM_164726|CG31908|chr2L|-	0.77	0.61	-0.16
NM_164727|CG31908|chr2L|-	0.77	0.61	-0.16
NM_140898|Su(Tpl)|chr3L|-	0.85	0.69	-0.16
NM_136769|CG7222|chr2R|+	0.65	0.49	-0.16
NM_164943|UbcD2|chr2L|-	0.73	0.57	-0.16
NM_168442|CG32073|chr3L|-	0.89	0.73	-0.16
NM_165678|Not1|chr2R|-	0.76	0.6	-0.16
NM_142672|CG5630|chr3R|+	0.78	0.62	-0.16
NM_001272672|caz|chrX|+	0.86	0.7	-0.16
NM_078929|phr|chr2R|+	0.52	0.36	-0.16
NM_001144224|olf186-F|chr2R|+	0.93	0.77	-0.16
NM_143531|CG15535|chr3R|-	0.23	0.07	-0.16
NM_001144527|CG33169|chr3L|+	0.54	0.38	-0.16
NM_001259979|MED31|chr3R|+	0.73	0.57	-0.16
NM_001104233|CG18748|chr3R|-	0.52	0.36	-0.16
NM_057653|Rsf1|chr2L|-	0.74	0.58	-0.16
NM_136314|gus|chr2R|-	0.62	0.46	-0.16
NM_001260046|CG2698|chr3R|+	0.8	0.64	-0.16
NM_057398|Btk29A|chr2L|-	0.22	0.06	-0.16
NM_001272441|Bx42|chrX|-	0.61	0.45	-0.16
NM_001273468|CG31704|chr2L|+	0.25	0.09	-0.16
NM_001031933|CG33232|chr3L|+	0.36	0.2	-0.16
NM_001272134|Pur-alpha|chr4|+	0.8	0.64	-0.16
NM_141239|ctrip|chr3R|-	0.52	0.36	-0.16
NM_001144169|CAP|chr2R|+	0.25	0.09	-0.16
NM_001273404|Cand1|chr2L|-	0.32	0.16	-0.16
NM_001259407|mus210|chr2R|+	0.8	0.64	-0.16
NM_132411|CG1628|chrX|-	0.86	0.7	-0.16
NM_001259150|CG10178|chr2L|+	0.83	0.67	-0.16
NM_141772|CG6574|chr3R|-	0.76	0.6	-0.16
NM_001276000|Ude|chr3R|-	0.6	0.44	-0.16
NM_057227|Hsf|chr2R|-	0.75	0.59	-0.16
NM_170256|gro|chr3R|+	0.53	0.37	-0.16
NM_001103836|cg|chr2R|+	0.76	0.6	-0.16
NM_001274393|CG2034|chr3L|+	0.71	0.55	-0.16
NM_001259621|Cht2|chr3L|-	0.56	0.4	-0.16
NM_079602|GstD1|chr3R|-	1	0.85	-0.15
NM_140480|CG12310|chr3L|-	0.21	0.06	-0.15
NM_165847|wal|chr2R|-	1	0.85	-0.15
NM_144096|CG15353|chr2L|-	0.21	0.06	-0.15
NM_167015|ctp|chrX|+	0.25	0.1	-0.15
NM_141070|VhaM9.7-b|chr3L|+	0.45	0.3	-0.15
NM_001275930|CG17109|chr3R|+	0.19	0.04	-0.15
NM_001275151|RhoGDI|chr3L|+	0.66	0.51	-0.15
NM_164367|Gs1|chr2L|+	0.75	0.6	-0.15
NM_170529|Sap-r|chr3R|-	0.73	0.58	-0.15
NM_057931|Lcp65Ac|chr3L|+	0.63	0.48	-0.15
NM_142028|CCHa2|chr3R|-	0.24	0.09	-0.15
NM_170019|CG5315|chr3R|-	0.3	0.15	-0.15
NM_142026|Droj2|chr3R|+	0.83	0.68	-0.15
NM_135352|CG8353|chr2L|+	1	0.85	-0.15
NM_141649|AP-47|chr3R|-	1	0.85	-0.15
NM_079093|Fib|chr2R|-	0.96	0.81	-0.15
NM_139979|GstO2|chr3L|-	0.85	0.7	-0.15
NM_142362|sds22|chr3R|+	1	0.85	-0.15
NM_136565|PGRP-SC1b|chr2R|+	0.61	0.46	-0.15
NM_001274712|CG6767|chr3L|-	0.77	0.62	-0.15
NM_001169744|CG13868|chr2R|-	0.29	0.14	-0.15
NM_167352|CG32641|chrX|+	0.7	0.55	-0.15
NM_135391|Bace|chr2L|-	1	0.85	-0.15
NM_001103812|CG34232|chr2R|-	0.73	0.58	-0.15
NM_166288|CG5174|chr2R|+	0.46	0.31	-0.15
NM_001170217|CG7048|chr3R|+	0.31	0.16	-0.15
NM_169085|CG31548|chr3R|-	0.53	0.38	-0.15
NM_166328|CG15111|chr2R|+	0.99	0.84	-0.15
NM_168089|CG32248|chr3L|+	0.93	0.78	-0.15
NM_001103884|CG34191|chr2R|+	0.72	0.57	-0.15
NR_002067|Hsromega|chr3R|+	0.58	0.43	-0.15
NM_167276|Dlic|chrX|+	0.94	0.79	-0.15
NM_141937|CG17202|chr3R|+	0.9	0.75	-0.15
NM_057766|noi|chr3R|-	1	0.85	-0.15
NM_143198|vps2|chr3R|+	0.52	0.37	-0.15
NM_001273561|EndoGI|chr2L|+	0.52	0.37	-0.15
NM_137118|CG17385|chr2R|-	0.48	0.33	-0.15
NM_001201851|SmB|chr2L|-	0.71	0.56	-0.15
NM_139599|CG14990|chr3L|+	0.78	0.63	-0.15
NM_001202286|poly|chr3R|-	0.52	0.37	-0.15
NM_141194|vps24|chr3R|-	0.48	0.33	-0.15
NM_139473|CG16985|chr3L|+	0.23	0.08	-0.15
NM_001202238|tacc|chr3R|-	0.28	0.13	-0.15
NM_140499|Prp31|chr3L|+	0.95	0.8	-0.15
NM_001144280|slik|chr2R|-	0.95	0.8	-0.15
NM_135997|CG18563|chr2L|-	0.81	0.66	-0.15
NM_142515|CG14286|chr3R|+	0.95	0.8	-0.15
NM_001169655|Den1|chr2R|+	0.68	0.53	-0.15
NM_136919|Den1|chr2R|+	0.68	0.53	-0.15
NM_132826|CG9240|chrX|-	0.58	0.43	-0.15
NM_205956|Cpr31A|chr2L|+	1	0.85	-0.15
NM_001274485|Syx17|chr3L|+	0.9	0.75	-0.15
NM_143299|bigmax|chr3R|-	0.44	0.29	-0.15
NM_136611|Mys45A|chr2R|-	0.96	0.81	-0.15
NM_141996|CG12360|chr3R|-	0.72	0.57	-0.15
NM_168015|ZnT63C|chr3L|+	0.7	0.55	-0.15
NM_144407|CG18787|chr2L|-	0.77	0.62	-0.15
NM_136038|CG10178|chr2L|+	0.82	0.67	-0.15
NM_001104411|CG7029|chr3R|+	0.57	0.42	-0.15
NM_001275177|CG5618|chr3L|+	0.24	0.09	-0.15
NM_165107|yuri|chr2L|-	0.37	0.22	-0.15
NM_140512|CG7857|chr3L|-	0.5	0.35	-0.15
NM_079010|AGO1|chr2R|-	0.48	0.33	-0.15
NM_135189|CG9536|chr2L|-	0.7	0.55	-0.15
NM_135450|CG17855|chr2L|+	0.7	0.55	-0.15
NM_001169509|CG34166|chr2L|+	0.4	0.26	-0.14
NM_168834|CG6933|chr3L|-	0.98	0.84	-0.14
NM_140934|CG6933|chr3L|-	0.98	0.84	-0.14
NM_170460|RpL32|chr3R|-	0.4	0.26	-0.14
NM_080373|epsilonTry|chr2R|-	0.83	0.69	-0.14
NM_080517|TotA|chr3R|+	0.53	0.39	-0.14
NM_167680|CoVIb|chrX|-	0.39	0.25	-0.14
NM_167678|CoVIb|chrX|-	0.39	0.25	-0.14
NM_135948|CaBP1|chr2L|-	1	0.86	-0.14
NM_166599|CG30415|chr2R|-	0.29	0.15	-0.14
NR_048205|CR42862|chr3L|+	0.98	0.84	-0.14
NM_057217|Gpdh|chr2L|+	0.23	0.09	-0.14
NM_080013|EfTuM|chr2R|+	1	0.86	-0.14
NM_079989|eIF-1A|chr3R|+	0.56	0.42	-0.14
NR_048398|CR43471|chr3R|-	0.99	0.85	-0.14
NM_137398|eIF3-S8|chr2R|+	0.94	0.8	-0.14
NM_164358|Sam-S|chr2L|+	0.37	0.23	-0.14
NM_168124|Msr-110|chr3L|-	0.4	0.26	-0.14
NM_135635|dUTPase|chr2L|+	1	0.86	-0.14
NM_001275310|CG40045|chr3L|+	0.61	0.47	-0.14
NM_001273153|His3.3A|chr2L|+	0.29	0.15	-0.14
NM_205934|Aats-ala|chr2L|-	1	0.86	-0.14
NM_001032269|sm|chr2R|-	1	0.86	-0.14
NM_079639|mRpL9|chr3R|+	0.99	0.85	-0.14
NM_169936|Atpalpha|chr3R|+	0.53	0.39	-0.14
NM_139846|CG8602|chr3L|-	1	0.86	-0.14
NM_001201920|CG16771|chr2L|+	1	0.86	-0.14
NM_142526|Cyp12a4|chr3R|+	0.67	0.53	-0.14
NM_001273573|Tpr2|chr2L|+	0.38	0.24	-0.14
NM_001103384|CG17636|chrX|-	0.93	0.79	-0.14
NM_164808|Mur29B|chr2L|+	0.24	0.1	-0.14
NM_169218|DppIII|chr3R|+	0.88	0.74	-0.14
NM_079391|Pros26|chr3L|-	0.66	0.52	-0.14
NM_001275169|CG17145|chr3L|+	0.63	0.49	-0.14
NM_132870|eIF5|chrX|-	0.75	0.61	-0.14
NM_001276229|MFS17|chr2RHet|-	0.18	0.04	-0.14
NM_136618|shrb|chr2R|-	0.66	0.52	-0.14
NM_079680|vib|chr3R|-	0.87	0.73	-0.14
NM_001170289|Ppn|chr3R|-	0.88	0.74	-0.14
NM_001032056|Pp2A-29B|chr2L|+	0.53	0.39	-0.14
NM_001144473|Wbp2|chr3L|+	0.41	0.27	-0.14
NR_073958|CR43944|chr3L|-	0.65	0.51	-0.14
NM_057288|mago|chr2R|+	0.36	0.22	-0.14
NM_170370|Hrb98DE|chr3R|+	0.6	0.46	-0.14
NM_001273069|CG17593|chr2L|+	0.27	0.13	-0.14
NM_139579|Sc2|chr3L|+	0.73	0.59	-0.14
NM_138104|CG4741|chr2R|-	0.61	0.47	-0.14
NM_058057|Inos|chr2R|-	0.5	0.36	-0.14
NM_001273754|CG42748|chr2L|+	1	0.86	-0.14
NM_057731|sw|chrX|-	0.54	0.4	-0.14
NM_135141|CG9135|chr2L|+	0.98	0.84	-0.14
NM_170388|CG11876|chr3R|+	0.89	0.75	-0.14
NM_141957|Snx3|chr3R|+	0.46	0.32	-0.14
NM_141885|Ect3|chr3R|+	1	0.86	-0.14
NM_057910|Idgf1|chr2L|+	0.67	0.53	-0.14
NM_001275722|CG3678|chr3R|-	0.33	0.19	-0.14
NM_137910|CG9877|chr2R|-	0.59	0.45	-0.14
NM_001273763|CG17493|chr2L|+	0.61	0.47	-0.14
NM_001202230|P5CDh1|chr3L|-	0.39	0.25	-0.14
NM_001274267|mRpL17|chr3L|+	0.26	0.12	-0.14
NM_135040|Scox|chr2L|-	0.63	0.49	-0.14
NM_001014627|gish|chr3R|+	0.32	0.18	-0.14
NM_001275072|CG7441|chr3L|+	1	0.86	-0.14
NM_144252|CG17776|chrX|+	0.63	0.49	-0.14
NM_001260100|fau|chr3R|-	0.34	0.2	-0.14
NM_167615|CG32549|chrX|-	0.33	0.19	-0.14
NM_080765|milt|chr2L|+	0.77	0.63	-0.14
NM_001170157|gish|chr3R|+	0.34	0.2	-0.14
NM_164983|Qtzl|chr2L|+	0.49	0.35	-0.14
NM_001272932|CG5001|chr2L|+	0.81	0.67	-0.14
NM_137479|GstE1|chr2R|+	0.79	0.65	-0.14
NM_164648|Hel25E|chr2L|-	0.41	0.27	-0.14
NM_001259820|nuf|chr3L|+	0.94	0.8	-0.14
NM_057460|Dpt|chr2R|+	0.49	0.35	-0.14
NM_079495|alpha-Cat|chr3L|-	0.46	0.32	-0.14
NM_001274028|CG6191|chr2R|-	0.8	0.66	-0.14
NM_138243|Sac1|chr3L|+	0.77	0.63	-0.14
NM_130547|CG11412|chrX|+	0.91	0.77	-0.14
NM_001273094|l(2)k05819|chr2L|+	0.23	0.09	-0.14
NM_206171|par-1|chr2R|+	0.68	0.54	-0.14
NM_001273244|snRNP-U1-70K|chr2L|-	0.25	0.11	-0.14
NM_165321|mRpS18B|chr2L|-	0.54	0.4	-0.14
NM_137753|Rae1|chr2R|-	0.77	0.63	-0.14
NM_057719|Mtor|chr2R|+	1	0.86	-0.14
NM_143788|CG13397|chr2L|-	1	0.86	-0.14
NM_001043097|hrg|chr2R|-	0.38	0.24	-0.14
NM_143027|CG5805|chr3R|-	0.78	0.64	-0.14
NM_001201743|Tao|chrX|-	0.39	0.25	-0.14
NM_001273335|CG17834|chr2L|+	0.5	0.36	-0.14
NM_141983|grsm|chr3R|-	0.66	0.52	-0.14
NM_143260|CG14253|chr3R|+	0.88	0.74	-0.14
NM_001259026|CG5850|chr2L|-	0.88	0.74	-0.14
NM_001258771|sd|chrX|+	0.37	0.23	-0.14
NM_001272949|mRpL48|chr2L|+	0.72	0.58	-0.14
NM_166787|myo|chr4|-	0.54	0.4	-0.14
NM_058142|for|chr2L|-	0.7	0.56	-0.14
NM_001169387|for|chr2L|-	0.7	0.56	-0.14
NM_140870|CG9300|chr3L|+	1	0.86	-0.14
NM_169093|Xe7|chr3R|-	0.3	0.16	-0.14
NM_001273132|betaggt-I|chr2L|+	0.74	0.6	-0.14
NM_079948|RpL30|chr2L|-	0.21	0.08	-0.13
NM_135805|RpL24|chr2L|-	0.32	0.19	-0.13
NM_166027|Cp1|chr2R|+	0.99	0.86	-0.13
NM_167679|CoVIb|chrX|-	0.36	0.23	-0.13
NM_169173|Mlp84B|chr3R|-	1	0.87	-0.13
NM_142343|CG17475|chr3R|-	1	0.87	-0.13
NM_001273319|Peritrophin-15b|chr2L|-	0.71	0.58	-0.13
NM_079983|Xbp1|chr2R|+	0.78	0.65	-0.13
NM_168425|Aps|chr3L|-	1	0.87	-0.13
NM_001273708|CG9318|chr2L|-	1	0.87	-0.13
NM_141718|Npc2d|chr3R|-	0.57	0.44	-0.13
NM_134687|CG2789|chr2L|+	0.46	0.33	-0.13
NM_057810|Cpr|chr2L|+	0.74	0.61	-0.13
NM_001170146|Caf1|chr3R|+	1	0.87	-0.13
NM_001275188|CG5059|chr3L|-	0.67	0.54	-0.13
NM_168865|CG5059|chr3L|-	0.67	0.54	-0.13
NM_001274002|Aats-asp|chr2R|+	0.64	0.51	-0.13
NM_132768|Lsd-2|chrX|-	0.67	0.54	-0.13
NM_130576|CG3740|chrX|-	1	0.87	-0.13
NM_080102|Aats-gln|chr3R|-	1	0.87	-0.13
NM_142510|snRNP-U1-C|chr3R|-	1	0.87	-0.13
NM_079031|ATPCL|chr2R|-	0.68	0.55	-0.13
NM_079875|mod|chr3R|+	0.8	0.67	-0.13
NM_142901|CG10182|chr3R|-	0.59	0.46	-0.13
NM_165330|CG31683|chr2L|-	0.25	0.12	-0.13
NM_143770|NAT1|chr2R|+	0.92	0.79	-0.13
NM_166880|SNF1A|chrX|+	0.95	0.82	-0.13
NM_001170279|Men-b|chr3R|+	0.72	0.59	-0.13
NM_001169681|AttB|chr2R|+	0.36	0.23	-0.13
NM_079972|Hmgs|chr2R|+	0.93	0.8	-0.13
NM_166169|Hmgs|chr2R|+	0.94	0.81	-0.13
NM_001170100|CG9399|chr3R|-	0.76	0.63	-0.13
NM_167050|MAPk-Ak2|chrX|-	0.54	0.41	-0.13
NM_166650|Chi|chr2R|-	1	0.87	-0.13
NM_001273431|CG17107|chr2L|+	0.18	0.05	-0.13
NM_137842|Vps20|chr2R|+	0.57	0.44	-0.13
NM_142586|CG4538|chr3R|-	0.79	0.66	-0.13
NM_136759|CG12338|chr2R|-	0.64	0.51	-0.13
NM_143844|CG17508|chr2R|+	0.52	0.39	-0.13
NM_080035|SmD1|chr3L|-	0.39	0.26	-0.13
NM_136225|CG9336|chr2L|+	0.53	0.4	-0.13
NM_078490|snf|chrX|+	0.54	0.41	-0.13
NM_079489|Csp|chr3L|+	0.78	0.65	-0.13
NM_167803|Gyk|chr3L|-	0.23	0.1	-0.13
NM_144022|CG32428|chr3L|-	0.86	0.73	-0.13
NM_143524|CG9743|chr3R|-	0.75	0.62	-0.13
NM_001201855|Myo31DF|chr2L|-	0.68	0.55	-0.13
NM_167303|Karl|chrX|+	0.89	0.76	-0.13
NM_001104371|CG4562|chr3R|-	0.82	0.69	-0.13
NM_001273640|CG13086|chr2L|+	0.94	0.81	-0.13
NM_001273913|Mef2|chr2R|-	0.96	0.83	-0.13
NM_001272407|Nrg|chrX|+	0.77	0.64	-0.13
NM_001274913|CG9238|chr3L|-	0.83	0.7	-0.13
NM_001104524|heph|chr3R|-	0.28	0.15	-0.13
NM_137980|CG12491|chr2R|-	0.41	0.28	-0.13
NM_142629|CG4335|chr3R|-	0.72	0.59	-0.13
NM_140451|CG9238|chr3L|-	0.8	0.67	-0.13
NM_141284|mRpL44|chr3R|-	0.88	0.75	-0.13
NM_133156|Nat1|chrX|+	0.54	0.41	-0.13
NM_001103425|CG34417|chrX|+	0.6	0.47	-0.13
NM_136517|RagC|chr2R|-	0.55	0.42	-0.13
NM_167804|thoc7|chr3L|-	0.78	0.65	-0.13
NM_130644|Ilp6|chrX|-	0.94	0.81	-0.13
NM_141677|Pnn|chr3R|+	0.93	0.8	-0.13
NM_140861|CG9451|chr3L|-	0.64	0.51	-0.13
NM_001272989|gho|chr2L|-	0.54	0.41	-0.13
NM_001103774|Not1|chr2R|-	0.67	0.54	-0.13
NM_170171|CG31357|chr3R|-	0.9	0.77	-0.13
NM_135402|PrBP|chr2L|-	0.57	0.44	-0.13
NM_001015187|CG40178|chr3LHet|-	0.16	0.03	-0.13
NM_079879|RpS3A|chr4|-	0.72	0.6	-0.12
NM_135038|Jon25Bii|chr2L|-	0.9	0.78	-0.12
NM_130519|CG3699|chrX|-	1	0.88	-0.12
NM_057925|Lcp65Ag1|chr3L|-	0.43	0.31	-0.12
NM_138034|eIF-5A|chr2R|+	0.55	0.43	-0.12
NM_135839|CG7953|chr2L|+	0.66	0.54	-0.12
NM_058030|Thiolase|chr2R|-	1	0.88	-0.12
NM_001276069|BM-40-SPARC|chr3R|-	0.7	0.58	-0.12
NM_135798|CG9306|chr2L|-	0.23	0.11	-0.12
NM_141555|CG8036|chr3R|+	0.53	0.41	-0.12
NM_135171|CG9498|chr2L|-	1	0.88	-0.12
NM_079586|Fdh|chr3R|-	0.95	0.83	-0.12
NM_001169294|MSBP|chrX|-	0.64	0.52	-0.12
NM_137481|GstE3|chr2R|+	0.83	0.71	-0.12
NM_134493|Sec61gamma|chrX|+	0.54	0.42	-0.12
NM_079262|GNBP3|chr3L|+	1	0.88	-0.12
NM_058042|skpA|chrX|+	0.52	0.4	-0.12
NR_073792|pncr003:2L|chr2L|+	0.78	0.66	-0.12
NM_143669|CG1970|chr4|-	0.77	0.65	-0.12
NM_057862|SdhA|chr2R|-	0.81	0.69	-0.12
NM_141027|CG10565|chr3L|-	1	0.88	-0.12
NM_135461|CG4364|chr2L|-	0.71	0.59	-0.12
NM_079309|yps|chr3L|-	0.71	0.59	-0.12
NM_130731|Vap-33-1|chrX|+	0.44	0.32	-0.12
NM_058047|alphaCop|chr3L|-	0.99	0.87	-0.12
NM_137227|Pex11|chr2R|-	1	0.88	-0.12
NM_135593|CG7296|chr2L|-	0.81	0.69	-0.12
NM_001110921|uex|chr2RHet|-	0.19	0.07	-0.12
NM_001104020|CG11537|chr3L|-	1	0.88	-0.12
NM_166583|l(2)k09913|chr2R|+	0.88	0.76	-0.12
NM_001014594|Pka-R1|chr3L|+	0.43	0.31	-0.12
NM_001169346|DIP1|chrX|-	0.37	0.25	-0.12
NM_144380|lectin-24A|chr2L|-	1	0.88	-0.12
NM_001273699|CG18858|chr2L|-	0.24	0.12	-0.12
NM_001259517|Glycogenin|chr2R|+	0.61	0.49	-0.12
NM_142926|Lsd-1|chr3R|+	0.45	0.33	-0.12
NM_057911|Elf|chr2L|+	0.67	0.55	-0.12
NM_001014558|CG33514|chr3L|+	0.64	0.52	-0.12
NM_078636|exd|chrX|+	0.94	0.82	-0.12
NM_167466|Chc|chrX|-	0.51	0.39	-0.12
NM_001043232|ps|chr3R|+	0.78	0.66	-0.12
NM_078716|mRpL10|chr2L|+	0.93	0.81	-0.12
NM_079945|crl|chrX|+	0.25	0.13	-0.12
[truncated: 1,560 more rows]

## Sheet: Ars2
Supplemental Table S8: Significant mRNA length differences in Ars2C/E mutants.
<2-fold					>2-fold Shortened					>2-fold Lengthened
	Mean_PDUI		PDUI			Mean_PDUI		PDUI			Mean_PDUI		PDUI
Gene	OregonR	Ars2	Group_diff		Gene	OregonR	Ars2	Group_diff		Gene	OregonR	Ars2	Group_diff
NM_078938|Ggamma1|chr2R|+	1	0.51	-0.49		NM_001202200|CG33255|chr3L|+	1	0.04	-0.96		NM_168239|Pdp1|chr3L|-	0.14	0.63	0.49
NM_169173|Mlp84B|chr3R|-	1	0.51	-0.49		NM_134928|CG9662|chr2L|-	1	0.06	-0.94		NM_142431|Ssdp|chr3R|-	0.51	1	0.49
NM_144467|CG3267|chr2R|+	1	0.51	-0.49		NM_001273068|CG9662|chr2L|-	0.89	0.07	-0.82		NM_079021|AttA|chr2R|+	0.07	0.57	0.5
NM_001014455|PNUTS|chr2L|+	1	0.51	-0.49		NM_001144634|CG5746|chr3R|-	0.96	0.14	-0.82		NM_137559|CG10476|chr2R|-	0.25	0.75	0.5
NM_170378|WASp|chr3R|-	0.74	0.25	-0.49		NM_164317|aux|chr3R|+	1	0.21	-0.79		NM_138060|CG3376|chr2R|+	0.38	1	0.62
NM_001201953|Lpin|chr2R|-	0.91	0.42	-0.49		NM_144290|CG12643|chrX|-	1	0.22	-0.78		NM_001260447|Npc2h|chr3R|-	0.29	0.93	0.64
NM_001104116|CG14132|chr3L|-	0.8	0.31	-0.49		NM_145882|CG30148|chr2R|-	0.9	0.15	-0.75		NM_166753|CG32850|chr4|+	0.16	1	0.84
NM_001273203|retm|chr2L|-	0.68	0.19	-0.49		NM_001144483|ome|chr3L|+	1	0.26	-0.74		NM_140443|CG13482|chr3L|+	0.14	1	0.86
NM_206108|CG33470|chr2R|+	0.93	0.44	-0.49		NM_206468|GstZ2|chr3R|-	1	0.27	-0.73		NM_001169813|CG42568|chr2R|-	0.09	1	0.91
NM_001170186|CG4662|chr3R|+	0.59	0.1	-0.49		NM_134959|CG2816|chr2L|+	1	0.27	-0.73
NM_001169624|Pkn|chr2R|-	0.89	0.4	-0.49		NM_001104369|Ire1|chr3R|-	0.93	0.2	-0.73
NM_167603|wupA|chrX|-	0.64	0.16	-0.48		NM_141638|GstZ2|chr3R|-	1	0.28	-0.72
NM_001169426|Hrb27C|chr2L|+	0.99	0.51	-0.48		NM_001144380|CG8671|chr2L|+	0.86	0.14	-0.72
NM_080326|cib|chrX|+	0.83	0.35	-0.48		NM_078636|exd|chrX|+	0.93	0.22	-0.71
NM_001104040|CG10625|chr3L|-	0.94	0.46	-0.48		NM_165558|Nop17l|chr2R|-	1	0.29	-0.71
NM_166920|Actn|chrX|-	0.81	0.33	-0.48		NM_141205|CG14646|chr3R|+	1	0.3	-0.7
NM_057932|Lcp65Aa|chr3L|+	0.87	0.39	-0.48		NM_001202236|CG14646|chr3R|+	1	0.3	-0.7
NM_169045|mtd|chr3R|-	0.83	0.35	-0.48		NM_001043009|l(2)01289|chr2R|-	1	0.3	-0.7
NM_001170289|Ppn|chr3R|-	0.96	0.48	-0.48		NM_001275539|Tsp86D|chr3R|+	1	0.3	-0.7
NM_136325|CG10417|chr2R|-	0.9	0.42	-0.48		NM_165676|ced-6|chr2R|-	0.97	0.28	-0.69
NM_135208|CG11050|chr2L|+	0.76	0.28	-0.48		NM_170117|Rox8|chr3R|-	1	0.31	-0.69
NM_001258507|Mitf|chr4|+	0.56	0.08	-0.48		NM_170118|Rox8|chr3R|-	1	0.31	-0.69
NM_206228|trio|chr3L|-	0.86	0.38	-0.48		NM_167502|Dsp1|chrX|+	1	0.31	-0.69
NM_001201873|nimB5|chr2L|+	0.58	0.1	-0.48		NM_001275690|srp|chr3R|+	1	0.31	-0.69
NM_001274631|CG13676|chr3L|-	0.91	0.43	-0.48		NM_135642|Ge-1|chr2L|-	0.98	0.3	-0.68
NM_001104326|CG6966|chr3R|-	0.86	0.38	-0.48		NM_080260|raps|chr3R|+	1	0.32	-0.68
NM_080323|dm|chrX|+	0.66	0.18	-0.48		NM_001259801|yps|chr3L|-	1	0.34	-0.66
NM_168576|CG32138|chr3L|+	1	0.52	-0.48		NM_132997|CG8408|chrX|-	0.92	0.26	-0.66
NM_133010|par-6|chrX|+	0.84	0.36	-0.48		NM_168022|CG12016|chr3L|+	0.9	0.24	-0.66
NM_001259740|Unr|chr3L|-	0.83	0.35	-0.48		NM_206599|svr|chrX|+	0.91	0.25	-0.66
NM_176060|CG33116|chr2L|+	0.8	0.32	-0.48		NM_169877|CG4662|chr3R|+	0.85	0.19	-0.66
NM_168881|siz|chr3L|+	0.8	0.32	-0.48		NR_048372|CR43283|chr3R|-	0.77	0.12	-0.65
NM_001031980|Ada2b|chr3R|-	0.77	0.29	-0.48		NM_167779|CG12576|chrX|-	0.97	0.34	-0.63
NM_001275525|CG12814|chr3R|-	0.86	0.38	-0.48		NM_136043|CG10413|chr2L|-	0.93	0.3	-0.63
NM_001260396|CG6051|chr3R|-	0.9	0.42	-0.48		NM_001103718|CG42748|chr2L|+	1	0.37	-0.63
NM_001014520|psq|chr2R|+	0.81	0.33	-0.48		NM_001042891|bru-2|chr2L|+	0.95	0.32	-0.63
NM_001275291|SPoCk|chr3L|+	0.73	0.25	-0.48		NM_001273605|Socs36E|chr2L|-	0.79	0.16	-0.63
NM_057519|Gprk2|chr3R|+	0.89	0.41	-0.48		NM_001274208|dnr1|chr2R|-	0.95	0.32	-0.63
NM_001169994|Indy|chr3L|-	0.7	0.23	-0.47		NM_166463|CG10433|chr2R|-	1	0.38	-0.62
NM_001260329|cnc|chr3R|-	0.9	0.43	-0.47		NM_001031918|waw|chrX|+	0.93	0.31	-0.62
NM_139489|CG9977|chr3L|-	1	0.53	-0.47		NM_169286|GstZ2|chr3R|-	0.74	0.12	-0.62
NM_164750|CG5973|chr2L|+	0.86	0.39	-0.47		NM_001258491|Hcf|chr4|+	0.74	0.12	-0.62
NM_206260|CG11486|chr3L|+	0.88	0.41	-0.47		NM_140451|CG9238|chr3L|-	0.83	0.21	-0.62
NM_165919|Galpha49B|chr2R|+	1	0.53	-0.47		NM_141244|CG14657|chr3R|-	0.92	0.3	-0.62
NM_001272498|ras|chrX|+	0.99	0.52	-0.47		NM_168160|Trn|chr3L|+	0.8	0.18	-0.62
NM_079907|ras|chrX|+	1	0.53	-0.47		NM_001104034|DOR|chr3L|+	0.85	0.24	-0.61
NM_001273602|BicD|chr2L|-	0.8	0.33	-0.47		NM_079027|Arf51F|chr2R|+	1	0.39	-0.61
NM_143792|qsm|chr2R|-	0.81	0.34	-0.47		NM_001272663|exd|chrX|+	0.78	0.17	-0.61
NM_170273|CG5455|chr3R|+	0.86	0.39	-0.47		NM_164777|pes|chr2L|-	0.84	0.23	-0.61
NM_168650|ClC-c|chr3L|+	0.68	0.21	-0.47		NM_001273754|CG42748|chr2L|+	1	0.39	-0.61
NM_135020|CG15626|chr2L|-	1	0.53	-0.47		NM_136081|CG10641|chr2L|-	0.77	0.16	-0.61
NM_168589|CG9238|chr3L|-	0.55	0.08	-0.47		NM_142190|Sra-1|chr3R|+	1	0.39	-0.61
NM_001273047|CG3558|chr2L|+	0.77	0.3	-0.47		NM_001274913|CG9238|chr3L|-	0.85	0.24	-0.61
NM_168416|CG32066|chr3L|-	0.79	0.32	-0.47		NM_001275109|fz2|chr3L|-	1	0.39	-0.61
NM_001104374|CG4360|chr3R|-	1	0.53	-0.47		NM_167313|pot|chrX|-	1	0.39	-0.61
NM_168741|Eip74EF|chr3L|-	0.92	0.45	-0.47		NM_001103599|CG34394|chr2L|-	0.95	0.34	-0.61
NM_168033|Eip63E|chr3L|+	0.74	0.27	-0.47		NM_079885|Pur-alpha|chr4|+	0.92	0.31	-0.61
NM_167805|CG16940|chr3L|+	0.8	0.33	-0.47		NM_168994|lost|chr3R|+	0.9	0.3	-0.6
NM_143528|CG9682|chr3R|+	1	0.54	-0.46		NM_168084|DOR|chr3L|+	0.7	0.1	-0.6
NM_137441|Muc55B|chr2R|-	1	0.54	-0.46		NM_001273716|vari|chr2L|-	0.83	0.23	-0.6
NM_169810|Vha100-2|chr3R|-	0.77	0.31	-0.46		NM_057257|crp|chr2L|-	1	0.4	-0.6
NM_140833|CG10424|chr3L|-	1	0.54	-0.46		NM_001260177|jvl|chr3R|+	0.81	0.21	-0.6
NM_001273763|CG17493|chr2L|+	0.61	0.15	-0.46		NR_048444|Hsromega|chr3R|+	0.9	0.31	-0.59
NM_001274358|alpha-Spec|chr3L|-	0.65	0.19	-0.46		NM_001259223|l(2)01289|chr2R|-	1	0.41	-0.59
NM_136726|CAP|chr2R|+	0.89	0.43	-0.46		NM_001103811|CG13177|chr2R|+	0.94	0.35	-0.59
NM_206338|CG11658|chr3L|-	1	0.54	-0.46		NM_001275709|Pak3|chr3R|-	0.99	0.4	-0.59
NM_135306|LKR|chr2L|-	0.83	0.37	-0.46		NM_079549|puc|chr3R|+	0.95	0.36	-0.59
NM_001104098|nudE|chr3L|+	1	0.54	-0.46		NM_168170|CG18769|chr3L|+	0.85	0.26	-0.59
NM_078908|Tsp42Ef|chr2R|+	0.74	0.28	-0.46		NM_001275986|CG6454|chr3R|+	0.92	0.33	-0.59
NM_165556|CG30497|chr2R|-	0.78	0.32	-0.46		NM_169276|Fps85D|chr3R|-	0.81	0.22	-0.59
NM_135370|CG7778|chr2L|+	0.85	0.39	-0.46		NM_001169868|CG12012|chr3L|+	1	0.42	-0.58
NM_135324|pes|chr2L|-	0.66	0.2	-0.46		NM_137137|CG30479|chr2R|-	0.88	0.3	-0.58
NM_001275720|CG18622|chr3R|-	1	0.54	-0.46		NM_001201829|jp|chr2L|-	1	0.42	-0.58
NM_136314|gus|chr2R|-	0.62	0.16	-0.46		NM_143221|CG5447|chr3R|+	0.88	0.3	-0.58
NM_164943|UbcD2|chr2L|-	0.73	0.27	-0.46		NM_001043288|CG13624|chr3R|-	1	0.42	-0.58
NM_205885|alpha-Adaptin|chr2L|-	0.64	0.18	-0.46		NM_169865|CG6231|chr3R|-	0.76	0.18	-0.58
NM_001273176|CG9171|chr2L|-	0.93	0.47	-0.46		NM_164858|jp|chr2L|-	0.88	0.3	-0.58
NM_142335|Patr-1|chr3R|+	0.62	0.16	-0.46		NM_001169353|Eph|chr4|+	0.73	0.15	-0.58
NM_001273063|Mad|chr2L|-	0.58	0.12	-0.46		NM_001032048|GlyP|chr2L|+	0.77	0.2	-0.57
NM_001169592|CG3409|chr2R|-	0.7	0.24	-0.46		NM_001274045|LamC|chr2R|-	0.91	0.34	-0.57
NM_140370|SRm160|chr3L|+	0.88	0.42	-0.46		NM_001272687|Anxb11|chrX|-	0.93	0.36	-0.57
NM_001274982|Hip14|chr3L|+	0.56	0.1	-0.46		NM_143572|Cpr100A|chr3R|+	0.77	0.2	-0.57
NM_079085|qkr58E-1|chr2R|-	0.7	0.24	-0.46		NM_001032408|kay|chr3R|+	0.96	0.39	-0.57
NM_001273221|homer|chr2L|-	0.63	0.17	-0.46		NM_001201725|CG5004|chrX|+	0.9	0.33	-0.57
NM_165632|Ggamma1|chr2R|+	1	0.55	-0.45		NM_135922|CG3793|chr2L|+	0.68	0.11	-0.57
NM_079362|mex1|chr3L|-	0.89	0.44	-0.45		NM_165242|kel|chr2L|-	0.83	0.26	-0.57
NM_001202181|mex1|chr3L|-	0.86	0.41	-0.45		NM_079659|cher|chr3R|-	0.81	0.25	-0.56
NM_168702|Nc73EF|chr3L|+	0.88	0.43	-0.45		NM_001169593|l(2)01289|chr2R|-	1	0.44	-0.56
NM_001274712|CG6767|chr3L|-	0.77	0.32	-0.45		NM_176008|CG4658|chr2L|+	0.79	0.23	-0.56
NM_140164|Aps|chr3L|-	0.74	0.29	-0.45		NM_001042906|CG34136|chr2L|+	0.85	0.29	-0.56
NM_169194|CG31472|chr3R|+	0.8	0.35	-0.45		NM_139560|CG14971|chr3L|-	0.8	0.24	-0.56
NM_166703|emp|chr2R|-	0.86	0.41	-0.45		NM_001144235|abba|chr2R|+	0.91	0.35	-0.56
NM_139611|VhaM9.7-c|chr3L|-	1	0.55	-0.45		NM_001274063|row|chr2R|-	1	0.44	-0.56
NM_138019|Gadd34|chr2R|-	0.84	0.39	-0.45		NM_001273314|Btk29A|chr2L|-	0.86	0.3	-0.56
NM_137822|CG13506|chr2R|+	1	0.55	-0.45		NM_169338|sle|chr3R|+	0.74	0.18	-0.56
NM_142944|CG5902|chr3R|+	0.89	0.44	-0.45		NM_144474|desat1|chr3R|+	0.74	0.19	-0.55
NM_001170234|CG5902|chr3R|+	0.89	0.44	-0.45		NM_140161|Cpr67Fa1|chr3L|+	1	0.45	-0.55
NM_001275880|E2f|chr3R|-	0.78	0.33	-0.45		NM_001170286|larp|chr3R|-	1	0.45	-0.55
NM_165420|gus|chr2R|-	0.6	0.15	-0.45		NM_140991|CG13252|chr3L|+	0.99	0.44	-0.55
NM_001169838|Ptpmeg|chr3L|+	0.81	0.36	-0.45		NM_001274659|rhea|chr3L|+	0.67	0.12	-0.55
NM_001259570|Mmp1|chr2R|-	0.71	0.26	-0.45		NM_001274644|cert|chr3L|-	0.94	0.39	-0.55
NM_001202076|Mmp1|chr2R|-	0.71	0.26	-0.45		NM_168911|M6|chr3L|+	0.67	0.12	-0.55
NM_139970|CG6983|chr3L|-	0.64	0.19	-0.45		NM_135713|crok|chr2L|+	0.95	0.4	-0.55
NM_137334|CG6805|chr2R|+	0.84	0.39	-0.45		NM_166846|svr|chrX|+	0.72	0.17	-0.55
NM_001273801|Adf1|chr2R|+	0.86	0.41	-0.45		NM_001144224|olf186-F|chr2R|+	0.88	0.33	-0.55
NM_001201822|Eaat1|chr2L|+	0.57	0.12	-0.45		NM_169022|Cdep|chr3R|+	0.7	0.15	-0.55
NM_001274895|CG32138|chr3L|+	1	0.55	-0.45		NM_001260471|krz|chr3R|-	0.81	0.26	-0.55
NM_142251|CG3303|chr3R|+	0.99	0.54	-0.45		NM_001259731|CG32369|chr3L|-	0.95	0.4	-0.55
NM_001043139|caps|chr3L|+	0.68	0.23	-0.45		NM_166318|abba|chr2R|+	0.91	0.36	-0.55
NM_001015122|rl|chr2RHet|+	0.53	0.08	-0.45		NM_135199|CG31637|chr2L|+	0.85	0.3	-0.55
NM_001274774|fd68A|chr3L|-	0.9	0.45	-0.45		NM_168756|Eip75B|chr3L|-	0.75	0.2	-0.55
NM_137717|Lapsyn|chr2R|+	0.89	0.44	-0.45		NM_142661|CG17273|chr3R|-	0.93	0.39	-0.54
NM_079673|fru|chr3R|-	0.7	0.25	-0.45		NM_166044|CG8547|chr2R|-	1	0.46	-0.54
NM_001038721|Dyrk3|chr4|-	0.68	0.23	-0.45		NM_170586|Map205|chr3R|-	0.77	0.23	-0.54
NM_168439|JIL-1|chr3L|-	0.76	0.31	-0.45		NM_001275429|CG14463|chr3R|+	1	0.46	-0.54
NM_001275339|CG14657|chr3R|-	0.74	0.29	-0.45		NM_001274276|mthl10|chr3L|-	0.92	0.38	-0.54
NM_166952|CG32795|chrX|-	0.66	0.22	-0.44		NM_001259820|nuf|chr3L|+	0.93	0.39	-0.54
NM_001038786|CG33995|chr2L|+	0.76	0.32	-0.44		NM_001260046|CG2698|chr3R|+	0.8	0.26	-0.54
NM_001144361|CLIP-190|chr2L|+	0.73	0.29	-0.44		NM_137429|olf186-F|chr2R|+	0.72	0.18	-0.54
NM_001274700|CG3529|chr3L|+	0.7	0.26	-0.44		NM_079356|Tak1|chrX|-	0.81	0.27	-0.54
NM_206171|par-1|chr2R|+	0.68	0.24	-0.44		NM_166466|CG10082|chr2R|+	1	0.46	-0.54
NM_167568|CG5445|chrX|+	1	0.56	-0.44		NM_001273740|CG8671|chr2L|+	0.63	0.09	-0.54
NM_140448|bbg|chr3L|-	0.85	0.41	-0.44		NM_001169608|CG8726|chr2R|-	1	0.46	-0.54
NM_140832|CG11577|chr3L|-	0.85	0.41	-0.44		NM_001276214|Gprk2|chr3R|+	0.81	0.27	-0.54
NM_001144650|Doa|chr3R|+	1	0.56	-0.44		NM_175970|Rtnl1|chr2L|-	0.64	0.11	-0.53
NM_078524|Smox|chrX|-	0.87	0.43	-0.44		NM_078890|Df31|chr2L|-	0.7	0.17	-0.53
NM_001272668|CG42354|chrX|-	0.85	0.41	-0.44		NM_001202130|akirin|chr3L|+	1	0.47	-0.53
NM_001144729|CG42354|chrX|-	0.85	0.41	-0.44		NM_001273126|CG2950|chr2L|-	0.76	0.23	-0.53
NM_140447|bbg|chr3L|-	0.76	0.32	-0.44		NM_001273715|vari|chr2L|-	0.76	0.23	-0.53
NM_001273376|CG4594|chr2L|+	0.59	0.15	-0.44		NM_001259457|CG43107|chr2R|-	1	0.47	-0.53
NM_001103441|CG33181|chrX|+	0.68	0.24	-0.44		NM_134605|Dd|chrX|-	0.65	0.12	-0.53
NM_143714|mab-21|chrX|-	0.99	0.55	-0.44		NM_143538|aralar1|chr3R|-	1	0.48	-0.52
NM_168417|CG32066|chr3L|-	0.8	0.36	-0.44		NM_168788|nes|chr3L|-	1	0.48	-0.52
NM_001103547|CrebB-17A|chrX|+	0.87	0.43	-0.44		NM_139556|CG12012|chr3L|+	0.86	0.34	-0.52
NM_001259658|prominin-like|chr3L|-	0.83	0.39	-0.44		NM_001015257|CG17167|chrXHet|+	1	0.48	-0.52
NM_137780|CG9304|chr2R|+	0.74	0.3	-0.44		NM_167599|CG7536|chrX|-	1	0.48	-0.52
NM_080379|Pal2|chr2R|+	0.9	0.46	-0.44		NM_079769|Hr96|chr3R|+	0.79	0.27	-0.52
NM_078935|Socs44A|chr2R|+	0.79	0.35	-0.44		NM_001258932|bowl|chr2L|+	0.69	0.17	-0.52
NM_169816|fru|chr3R|-	0.96	0.52	-0.44		NM_137335|Ehbp1|chr2R|-	1	0.48	-0.52
NM_001104469|sda|chr3R|+	0.82	0.38	-0.44		NM_001103703|Fas3|chr2L|+	0.85	0.33	-0.52
NM_135947|CG4455|chr2L|+	0.9	0.46	-0.44		NM_001043257|Dys|chr3R|+	0.7	0.18	-0.52
NM_057397|Btk29A|chr2L|-	0.86	0.42	-0.44		NM_176133|lola|chr2R|-	0.59	0.07	-0.52
NM_133148|CG8034|chrX|-	0.74	0.3	-0.44		NM_057632|sgl|chr3L|-	0.88	0.37	-0.51
NM_134935|Cog3|chr2L|-	0.81	0.37	-0.44		NM_137089|CG8323|chr2R|+	0.79	0.28	-0.51
NM_078631|CycD|chrX|-	0.63	0.19	-0.44		NM_140132|scramb1|chr3L|-	0.74	0.23	-0.51
NM_168588|Mpcp|chr3L|+	0.74	0.31	-0.43		NM_168404|scramb1|chr3L|-	0.74	0.23	-0.51
NM_168425|Aps|chr3L|-	1	0.57	-0.43		NM_166430|Pu|chr2R|+	0.73	0.22	-0.51
NM_168522|CG10960|chr3L|-	0.73	0.3	-0.43		NM_057991|Hs2st|chr2L|-	1	0.49	-0.51
NM_001275188|CG5059|chr3L|-	0.66	0.23	-0.43		NM_136293|CG1832|chr2L|-	0.82	0.31	-0.51
NM_168865|CG5059|chr3L|-	0.66	0.23	-0.43		NM_134786|CG7337|chr2L|+	0.91	0.4	-0.51
NM_135307|Herp|chr2L|-	0.77	0.34	-0.43		NM_079949|Mcr|chr2L|-	0.87	0.36	-0.51
NM_165845|Tret1-1|chr2R|+	0.61	0.18	-0.43		NM_001042862|CG7337|chr2L|+	0.85	0.34	-0.51
NM_137042|Roe1|chr2R|+	0.79	0.36	-0.43		NM_001042863|CG7337|chr2L|+	0.86	0.35	-0.51
NM_079217|S6k|chr3L|-	1	0.57	-0.43		NM_001275340|CG14657|chr3R|-	0.76	0.25	-0.51
NM_168008|CG17746|chr3L|-	0.81	0.38	-0.43		NM_001275397|CG1943|chr3R|+	0.96	0.46	-0.5
NM_164855|numb|chr2L|+	1	0.57	-0.43		NM_137628|CG13868|chr2R|-	0.67	0.17	-0.5
NM_166434|MFS16|chr2R|+	0.7	0.27	-0.43		NM_170058|cnc|chr3R|-	0.78	0.28	-0.5
NM_166156|mrj|chr2R|-	0.63	0.2	-0.43		NM_079266|Dhpr|chr3L|+	0.68	0.18	-0.5
NM_001259026|CG5850|chr2L|-	0.88	0.45	-0.43		NM_132901|rngo|chrX|+	0.93	0.43	-0.5
NM_001201828|jp|chr2L|-	0.94	0.51	-0.43		NM_135308|r2d2|chr2L|+	0.75	0.25	-0.5
NM_168743|Ndfip|chr3L|-	0.66	0.23	-0.43		NM_001144669|svr|chrX|+	0.83	0.33	-0.5
NM_057732|Cdk5|chr2R|-	0.53	0.1	-0.43		NM_135606|CG17124|chr2L|-	0.87	0.37	-0.5
NM_136059|Irk3|chr2L|-	0.61	0.18	-0.43		NM_143655|yellow-h|chr4|+	0.71	0.21	-0.5
NM_167987|prominin-like|chr3L|-	0.85	0.42	-0.43		NM_142363|Sur-8|chr3R|-	0.75	0.25	-0.5
NM_143260|CG14253|chr3R|+	0.88	0.45	-0.43		NM_143014|CG13624|chr3R|-	1	0.5	-0.5
NM_139397|CG18173|chr3L|-	0.67	0.24	-0.43		NM_079096|yellow-d|chr2R|+	0.84	0.34	-0.5
NM_141596|CG11975|chr3R|+	0.7	0.27	-0.43		NM_001104262|CG12945|chr3R|-	0.58	0.08	-0.5
NM_080050|raw|chr2L|-	0.72	0.29	-0.43		NM_001169420|CG9171|chr2L|-	0.87	0.37	-0.5
NM_001273612|MESR3|chr2L|+	0.75	0.32	-0.43		NM_168446|fd68A|chr3L|-	0.92	0.42	-0.5
NM_168368|CG42268|chr3L|-	0.72	0.29	-0.43		NM_142622|CG4360|chr3R|-	1	0.5	-0.5
NM_165469|Pld|chr2R|+	0.64	0.21	-0.43		NM_057669|Mad|chr2L|-	0.69	0.19	-0.5
NM_168681|Lasp|chr3L|-	0.81	0.38	-0.43		NM_132334|BCL7-like|chrX|+	0.9	0.4	-0.5
NM_001103836|cg|chr2R|+	0.73	0.3	-0.43		NM_136122|Rab9|chr2L|+	0.68	0.18	-0.5
NM_001258824|CoRest|chrX|+	0.77	0.34	-0.43
NM_001038945|CG33969|chr3L|-	0.75	0.32	-0.43
NM_136449|CG1600|chr2R|-	1	0.58	-0.42
NM_079795|His2Av|chr3R|+	0.87	0.45	-0.42
NM_141032|CG10512|chr3L|+	0.66	0.24	-0.42
NM_001169744|CG13868|chr2R|-	0.53	0.11	-0.42
NM_143844|CG17508|chr2R|+	0.53	0.11	-0.42
NM_079244|Arp3|chr3L|-	1	0.58	-0.42
NM_206736|Gbeta13F|chrX|+	0.62	0.2	-0.42
NM_001275593|CtBP|chr3R|+	0.7	0.28	-0.42
NM_140408|CG8745|chr3L|-	0.52	0.1	-0.42
NM_001274366|R|chr3L|-	0.88	0.46	-0.42
NM_001144257|Sdc|chr2R|-	0.68	0.26	-0.42
NM_001273064|Hydr2|chr2L|+	0.75	0.33	-0.42
NM_141431|CG1105|chr3R|-	0.54	0.12	-0.42
NM_167788|Cda4|chrX|-	0.68	0.26	-0.42
NM_001043001|CG14464|chr2R|+	0.6	0.18	-0.42
NM_078706|Sep1|chrX|+	0.83	0.41	-0.42
NM_001169675|CG6145|chr2R|-	0.73	0.31	-0.42
NM_058055|JTBR|chr3L|-	1	0.58	-0.42
NM_165441|scaf|chr2R|-	0.66	0.24	-0.42
NM_057405|Su(dx)|chr2L|+	0.85	0.43	-0.42
NM_165055|CG9008|chr2L|-	0.89	0.47	-0.42
NM_142601|psidin|chr3R|+	1	0.58	-0.42
NM_001274521|S6k|chr3L|-	0.73	0.31	-0.42
NM_168232|CG32369|chr3L|-	0.93	0.51	-0.42
NM_057418|tra2|chr2R|-	0.61	0.19	-0.42
NM_132344|Lst8|chrX|-	0.9	0.48	-0.42
NM_169267|CG8121|chr3R|+	0.64	0.22	-0.42
NM_001259109|CG3793|chr2L|+	0.5	0.08	-0.42
NM_001275807|CG16718|chr3R|-	0.61	0.19	-0.42
NM_142941|AP-1sigma|chr3R|+	0.73	0.31	-0.42
NM_001103581|CG7337|chr2L|+	0.82	0.4	-0.42
NM_132995|CG12991|chrX|+	0.72	0.3	-0.42
NM_078907|Tsp42Ee|chr2R|+	0.59	0.18	-0.41
NM_001273803|Rab2|chr2R|+	1	0.59	-0.41
NM_001201661|pdgy|chrX|-	1	0.59	-0.41
NM_142030|CG9796|chr3R|-	0.93	0.52	-0.41
NM_001169612|lig|chr2R|+	1	0.59	-0.41
NM_001169928|UGP|chr3L|-	0.73	0.32	-0.41
NM_001169641|whd|chr2R|-	0.62	0.21	-0.41
NM_142659|CG17271|chr3R|-	0.9	0.49	-0.41
NM_001201964|CG8026|chr2R|-	0.68	0.27	-0.41
NM_168129|Ubp64E|chr3L|+	1	0.59	-0.41
NM_206389|Lmpt|chr3L|+	0.66	0.25	-0.41
NM_001042931|CG17493|chr2L|+	0.59	0.18	-0.41
NM_001276225|Map205|chr3R|-	0.54	0.13	-0.41
NM_001170297|Vha100-1|chr3R|+	0.58	0.17	-0.41
NM_143415|Vha100-1|chr3R|+	0.58	0.17	-0.41
NM_169002|CG31522|chr3R|-	0.63	0.22	-0.41
NM_167790|Pdk1|chr3L|+	0.65	0.24	-0.41
NM_079713|E2f|chr3R|-	0.81	0.4	-0.41
NM_001259128|BicD|chr2L|-	0.76	0.35	-0.41
NM_170453|Acph-1|chr3R|-	0.63	0.22	-0.41
NM_135826|CG9008|chr2L|-	0.88	0.47	-0.41
NM_140020|CG5068|chr3L|+	1	0.59	-0.41
NM_136670|sqa|chr2R|-	0.76	0.35	-0.41
NM_132058|CG5966|chrX|+	0.78	0.37	-0.41
NM_167224|alpha-Man-I|chrX|-	1	0.59	-0.41
NM_057227|Hsf|chr2R|-	0.77	0.36	-0.41
NM_001272137|Slip1|chr4|+	0.63	0.22	-0.41
NM_132936|CG4768|chrX|+	0.97	0.56	-0.41
NM_001144543|CG1021|chr3R|-	0.94	0.53	-0.41
NM_135698|JhI-21|chr2L|-	0.68	0.27	-0.41
NM_001169296|shi|chrX|+	0.77	0.36	-0.41
NM_141316|CG1347|chr3R|+	1	0.59	-0.41
NM_169774|CG31249|chr3R|-	0.78	0.37	-0.41
NM_001259893|Eip75B|chr3L|-	0.51	0.1	-0.41
NM_001273217|Nhe3|chr2L|-	0.56	0.15	-0.41
NM_176103|CG14764|chr2R|-	0.62	0.21	-0.41
NM_078503|Spx|chrX|+	0.62	0.21	-0.41
NM_166077|ckn|chr2R|+	0.65	0.24	-0.41
NM_165579|nito|chr2R|+	0.79	0.38	-0.41
NM_080046|g|chrX|-	0.68	0.27	-0.41
NM_164361|Sam-S|chr2L|+	0.78	0.38	-0.4
NM_136267|Lamp1|chr2L|+	0.56	0.16	-0.4
NM_141434|CG1943|chr3R|+	0.99	0.59	-0.4
NM_167086|CG3168|chrX|-	1	0.6	-0.4
NM_168532|CG11255|chr3L|-	0.94	0.54	-0.4
NM_141578|Tcp-1eta|chr3R|+	0.91	0.51	-0.4
NM_057352|ref(2)P|chr2L|+	0.72	0.32	-0.4
NM_141526|Sgt1|chr3R|-	0.78	0.38	-0.4
NM_206739|Gbeta13F|chrX|+	0.6	0.2	-0.4
NM_137509|CG5482|chr2R|-	0.65	0.25	-0.4
NM_130656|Seipin|chrX|+	1	0.6	-0.4
NM_057812|Lis-1|chr2R|+	0.51	0.11	-0.4
NM_135079|fusl|chr2L|-	0.96	0.56	-0.4
NM_142967|CG5510|chr3R|-	0.88	0.48	-0.4
NM_001170143|CG42542|chr3R|+	0.93	0.53	-0.4
NM_169620|CG42542|chr3R|+	0.93	0.53	-0.4
NM_137949|CG9812|chr2R|-	0.78	0.38	-0.4
NM_176042|Rab14|chr2L|+	0.63	0.23	-0.4
NM_001273389|Rsf1|chr2L|-	0.58	0.18	-0.4
NM_057501|Src42A|chr2R|+	0.64	0.24	-0.4
NM_169591|put|chr3R|-	0.78	0.38	-0.4
NM_001201744|Tao|chrX|-	0.67	0.27	-0.4
NM_136583|CG8232|chr2R|+	0.83	0.43	-0.4
NM_136142|CG10337|chr2L|-	0.83	0.43	-0.4
NM_132540|pot|chrX|-	0.9	0.5	-0.4
NM_001276073|Tsp97E|chr3R|-	0.79	0.39	-0.4
NM_080083|fwd|chr3L|-	0.6	0.2	-0.4
NM_167003|GlcAT-I|chrX|+	0.61	0.21	-0.4
NM_140955|kin17|chr3L|+	0.64	0.24	-0.4
NM_078569|RpII215|chrX|-	0.72	0.32	-0.4
NM_079734|cenB1A|chr3R|+	0.78	0.38	-0.4
NM_136845|CG9003|chr2R|-	0.77	0.37	-0.4
NM_137836|dnr1|chr2R|-	0.64	0.24	-0.4
NM_170101|Gdh|chr3R|-	0.84	0.45	-0.39
NM_139701|CG4769|chr3L|+	0.75	0.36	-0.39
NM_001202253|Rm62|chr3R|-	1	0.61	-0.39
NM_079519|Rm62|chr3R|-	1	0.61	-0.39
NM_176012|CG33129|chr2L|-	0.5	0.11	-0.39
NR_073792|pncr003:2L|chr2L|+	1	0.61	-0.39
NM_001272573|REG|chrX|+	0.98	0.59	-0.39
NM_143199|Dak1|chr3R|-	0.98	0.59	-0.39
NM_137746|CG10433|chr2R|-	0.59	0.2	-0.39
NM_001169493|bun|chr2L|-	0.81	0.42	-0.39
NM_137187|CG8160|chr2R|-	0.51	0.12	-0.39
NM_143105|CG11857|chr3R|+	0.6	0.21	-0.39
NM_169303|Unc-115b|chr3R|-	0.7	0.31	-0.39
NM_164885|Trp1|chr2L|+	0.95	0.56	-0.39
NM_143017|atl|chr3R|+	0.67	0.28	-0.39
NM_167469|Gbeta13F|chrX|+	0.58	0.19	-0.39
NM_001274320|CG9153|chr3L|+	0.97	0.58	-0.39
NM_057268|Lam|chr2L|+	0.78	0.39	-0.39
NM_001170145|CG42542|chr3R|+	0.9	0.51	-0.39
NM_079363|CrebA|chr3L|+	0.96	0.57	-0.39
NM_001169726|CG30122|chr2R|-	0.88	0.49	-0.39
NM_001169725|CG30122|chr2R|-	0.88	0.49	-0.39
NM_001202083|Pdk1|chr3L|+	0.65	0.26	-0.39
NM_168015|ZnT63C|chr3L|+	0.73	0.34	-0.39
NM_001274996|Zn72D|chr3L|-	1	0.61	-0.39
NM_145873|CG18659|chr2R|-	0.97	0.58	-0.39
NM_001272909|cold|chr2L|+	0.64	0.25	-0.39
NM_001275632|140up|chr3R|-	1	0.61	-0.39
NM_143027|CG5805|chr3R|-	0.77	0.38	-0.39
NM_001272969|Su(dx)|chr2L|+	0.77	0.38	-0.39
NM_001274981|Hip14|chr3L|+	1	0.61	-0.39
NM_140401|CG10741|chr3L|+	1	0.61	-0.39
NM_001272659|shi|chrX|+	0.57	0.18	-0.39
NM_001169810|TBPH|chr2R|-	0.84	0.45	-0.39
NM_140366|ste14|chr3L|+	0.76	0.37	-0.39
NM_001258574|wds|chrX|+	0.78	0.39	-0.39
NM_168298|Tsp66E|chr3L|+	0.71	0.32	-0.39
NM_167164|Crag|chrX|+	0.75	0.36	-0.39
NM_057845|wun|chr2R|-	0.75	0.36	-0.39
NM_001259766|CG4080|chr3L|-	0.69	0.3	-0.39
NM_142290|CG14883|chr3R|+	0.6	0.21	-0.39
NM_001258584|Mnt|chrX|+	0.77	0.38	-0.39
NM_135700|rab3-GAP|chr2L|-	0.68	0.29	-0.39
NM_001275956|Nup98-96|chr3R|-	0.86	0.47	-0.39
NM_142734|CG6656|chr3R|+	0.64	0.25	-0.39
NM_165905|Dyb|chr2R|+	0.69	0.3	-0.39
NM_141791|Tctp|chr3R|+	0.62	0.24	-0.38
NM_057295|Mp20|chr2R|+	0.79	0.41	-0.38
NM_166265|pAbp|chr2R|+	0.53	0.15	-0.38
NM_132208|CG2254|chrX|-	0.64	0.26	-0.38
NM_079181|Scsalpha|chr3L|+	0.7	0.32	-0.38
NM_141311|elm|chr3R|-	0.79	0.41	-0.38
NM_001273902|Uba1|chr2R|-	0.88	0.5	-0.38
NM_166780|gw|chr4|-	1	0.62	-0.38
NM_206764|Rbp2|chrX|+	0.56	0.18	-0.38
NM_167994|CG32280|chr3L|+	0.88	0.5	-0.38
NM_140043|UGP|chr3L|-	0.66	0.28	-0.38
NM_164648|Hel25E|chr2L|-	0.41	0.03	-0.38
NM_140518|AGO2|chr3L|+	0.92	0.54	-0.38
NM_001259432|Lis-1|chr2R|+	1	0.62	-0.38
NM_140652|Baldspot|chr3L|-	0.81	0.43	-0.38
NM_001103562|CG34331|chrX|+	0.81	0.43	-0.38
NM_001273861|CG18812|chr2R|-	0.85	0.47	-0.38
NM_165750|gem|chr2R|+	0.64	0.26	-0.38
NM_001259262|CG18812|chr2R|-	0.81	0.43	-0.38
NM_136702|oys|chr2R|-	0.66	0.28	-0.38
NM_079135|emp|chr2R|-	0.91	0.53	-0.38
NM_138002|CG5339|chr2R|-	1	0.62	-0.38
NM_001103507|Pdcd4|chrX|-	0.49	0.11	-0.38
NM_001273862|CG30497|chr2R|-	0.7	0.32	-0.38
NM_001170197|Mvl|chr3R|-	0.49	0.11	-0.38
NM_001103438|CG33181|chrX|+	0.91	0.53	-0.38
NM_141571|CG8223|chr3R|+	0.82	0.44	-0.38
NM_001272888|Pi3K21B|chr2L|+	0.66	0.28	-0.38
NM_139378|CG13928|chr3L|-	1	0.62	-0.38
NM_165834|CG7777|chr2R|+	0.5	0.12	-0.38
NM_001169974|bmm|chr3L|-	0.7	0.32	-0.38
NM_137788|Snp|chr2R|+	0.59	0.21	-0.38
NM_132529|CG2025|chrX|-	0.96	0.58	-0.38
NM_168072|ago|chr3L|-	0.83	0.45	-0.38
NM_001274680|CG5068|chr3L|+	0.5	0.12	-0.38
NM_001169606|CG1399|chr2R|-	0.56	0.18	-0.38
NM_001272537|ATP7|chrX|+	0.68	0.3	-0.38
NM_143033|CG5807|chr3R|-	0.85	0.47	-0.38
NM_079677|cdi|chr3R|-	0.56	0.18	-0.38
NM_001276048|Tsp96F|chr3R|-	0.58	0.2	-0.38
NM_169794|Ssdp|chr3R|-	0.89	0.51	-0.38
NM_168007|CG11505|chr3L|+	0.88	0.5	-0.38
NM_079776|Tsp96F|chr3R|-	0.62	0.24	-0.38
NM_134960|CG2818|chr2L|+	0.6	0.22	-0.38
NM_142960|CG5463|chr3R|-	0.78	0.4	-0.38
NM_078884|betaInt-nu|chr2L|+	0.6	0.22	-0.38
NM_166264|pAbp|chr2R|+	0.61	0.24	-0.37
NM_001272445|His3.3B|chrX|-	0.51	0.14	-0.37
NM_137045|CG42807|chr2R|-	0.8	0.43	-0.37
NM_001169598|CG30159|chr2R|+	1	0.63	-0.37
NM_168543|flr|chr3L|+	0.86	0.49	-0.37
NM_166349|hts|chr2R|-	0.52	0.15	-0.37
NM_001104020|CG11537|chr3L|-	0.97	0.6	-0.37
NM_001202094|R|chr3L|-	0.79	0.42	-0.37
NM_135387|fu12|chr2L|-	0.92	0.55	-0.37
NM_058142|for|chr2L|-	0.69	0.32	-0.37
NM_001169387|for|chr2L|-	0.69	0.32	-0.37
NM_136373|Fmo-2|chr2R|-	0.64	0.27	-0.37
NM_169493|CG12360|chr3R|-	0.71	0.34	-0.37
NM_167033|spoon|chrX|-	0.69	0.32	-0.37
NM_135790|CG31729|chr2L|+	0.57	0.2	-0.37
NM_001103425|CG34417|chrX|+	0.81	0.44	-0.37
NM_139722|CG10590|chr3L|-	0.5	0.13	-0.37
NM_164392|drongo|chr2L|-	1	0.63	-0.37
NM_001169377|drongo|chr2L|-	1	0.63	-0.37
NM_137807|Vps35|chr2R|+	0.55	0.18	-0.37
NM_001274367|CG12025|chr3L|+	0.78	0.41	-0.37
NM_001144657|sima|chr3R|+	0.58	0.21	-0.37
NM_206572|CG33494|chr3R|-	0.49	0.12	-0.37
NM_001169440|Pvr|chr2L|-	0.51	0.14	-0.37
NM_001272825|CG32512|chrX|-	0.96	0.59	-0.37
NM_001201792|Pvr|chr2L|-	0.54	0.17	-0.37
NM_137109|CG8613|chr2R|+	0.78	0.41	-0.37
NM_001275793|dnk|chr3R|+	0.67	0.3	-0.37
NM_001273738|CG8678|chr2L|-	0.46	0.09	-0.37
NM_001260354|CG6364|chr3R|+	0.58	0.21	-0.37
NM_057398|Btk29A|chr2L|-	0.55	0.18	-0.37
NM_169941|Calx|chr3R|+	0.72	0.35	-0.37
NM_137751|CG10082|chr2R|+	0.86	0.49	-0.37
NM_140465|mop|chr3L|-	0.53	0.16	-0.37
NM_001259292|Pkn|chr2R|-	0.67	0.3	-0.37
NM_167100|CG32732|chrX|-	0.6	0.23	-0.37
NM_141679|CG12948|chr3R|-	0.86	0.49	-0.37
NM_001259778|A2bp1|chr3L|+	0.63	0.26	-0.37
NM_058063|smt3|chr2L|-	0.89	0.53	-0.36
NM_169361|fau|chr3R|-	0.54	0.18	-0.36
NM_168124|Msr-110|chr3L|-	0.5	0.14	-0.36
NM_164358|Sam-S|chr2L|+	0.47	0.11	-0.36
NM_078861|VhaSFD|chr2L|-	0.65	0.29	-0.36
NM_164453|GlyP|chr2L|+	0.56	0.2	-0.36
NM_001275366|elm|chr3R|-	0.59	0.23	-0.36
NM_001169632|CG1516|chr2R|-	0.81	0.45	-0.36
NM_141807|CG5214|chr3R|+	0.65	0.29	-0.36
NM_140199|scyl|chr3L|+	1	0.64	-0.36
NM_078720|Spp|chr2L|-	0.54	0.18	-0.36
NM_168932|Atox1|chr3L|+	0.53	0.17	-0.36
NM_001103824|CG17574|chr2R|-	0.65	0.29	-0.36
NM_079657|Scp2|chr3R|-	0.74	0.38	-0.36
NM_001272831|CG32521|chrX|-	0.64	0.28	-0.36
NM_001275889|CG6455|chr3R|-	0.6	0.24	-0.36
NM_001273708|CG9318|chr2L|-	0.92	0.56	-0.36
NM_079024|Cyp6a9|chr2R|-	0.43	0.07	-0.36
NM_001259492|hts|chr2R|-	0.51	0.15	-0.36
NM_167988|CG11537|chr3L|-	0.98	0.62	-0.36
NM_135297|CG7214|chr2L|-	0.77	0.41	-0.36
NM_001014643|Stat92E|chr3R|-	0.87	0.51	-0.36
NM_132092|Marf|chrX|+	0.64	0.28	-0.36
NM_137995|ytr|chr2R|-	0.93	0.57	-0.36
NM_001169824|pio|chr2R|+	1	0.64	-0.36
NM_001103607|CG3714|chr2L|-	0.97	0.61	-0.36
NM_079393|Mo25|chr3L|-	0.7	0.34	-0.36
NM_001272932|CG5001|chr2L|+	0.89	0.53	-0.36
NM_057533|tws|chr3R|-	0.51	0.15	-0.36
NM_079152|emc|chr3L|+	0.65	0.29	-0.36
NM_168950|Csp|chr3L|+	0.77	0.41	-0.36
NM_136050|CG31751|chr2L|+	0.67	0.31	-0.36
NM_131993|spoon|chrX|-	0.68	0.32	-0.36
NM_134301|cad|chr2L|+	1	0.64	-0.36
NM_001259976|CG31522|chr3R|-	0.86	0.5	-0.36
NM_167794|Pdk1|chr3L|+	0.62	0.26	-0.36
NM_167198|l(1)G0232|chrX|-	0.82	0.46	-0.36
NM_080361|betaggt-I|chr2L|+	0.92	0.56	-0.36
NM_135367|CG14275|chr2L|+	0.67	0.31	-0.36
NM_001259211|gus|chr2R|-	0.47	0.11	-0.36
NM_136347|Src42A|chr2R|+	0.54	0.18	-0.36
NM_142648|Cpr92F|chr3R|+	1	0.64	-0.36
NM_143670|Ephrin|chr4|+	0.65	0.29	-0.36
NM_001042962|CG17683|chr2R|+	0.61	0.25	-0.36
NM_134606|CG1486|chrX|+	0.57	0.21	-0.36
NM_001272623|Flo-2|chrX|+	0.64	0.28	-0.36
NM_001104225|CG10277|chr3R|+	0.6	0.24	-0.36
NM_135646|CG6230|chr2L|-	0.58	0.22	-0.36
NM_135341|CG8552|chr2L|-	0.74	0.38	-0.36
NM_140184|CG42575|chr3L|+	0.54	0.18	-0.36
NM_136687|sec24|chr2R|-	0.63	0.27	-0.36
NM_001014498|CG1832|chr2L|-	0.56	0.2	-0.36
NM_142925|CG10217|chr3R|-	0.63	0.27	-0.36
NM_168859|CG5130|chr3L|-	0.68	0.32	-0.36
NM_170130|twin|chr3R|-	0.67	0.31	-0.36
NM_134824|CG16995|chr2L|+	0.49	0.13	-0.36
NM_132864|Rrp47|chrX|+	0.64	0.28	-0.36
NM_001272826|CG32512|chrX|-	0.94	0.58	-0.36
NM_131934|CG3626|chrX|+	0.76	0.4	-0.36
NM_166834|CG3038|chrX|-	0.93	0.57	-0.36
NM_001274091|Asph|chr2R|+	0.83	0.47	-0.36
NM_001169473|CG6700|chr2L|-	0.66	0.3	-0.36
NM_001259291|Pkn|chr2R|-	0.67	0.31	-0.36
NM_166204|CG6665|chr2R|+	0.66	0.3	-0.36
NM_001259450|CG6805|chr2R|+	0.57	0.21	-0.36
NM_001043308|CG34133|chr3R|+	0.77	0.41	-0.36
NM_143279|gb|chr3R|-	0.7	0.34	-0.36
NM_001103704|Fas3|chr2L|+	0.69	0.33	-0.36
NM_057947|Thor|chr2L|+	0.73	0.38	-0.35
NM_001144207|Vha44|chr2R|-	0.91	0.56	-0.35
NM_168306|pix|chr3L|-	0.74	0.39	-0.35
NM_079309|yps|chr3L|-	0.71	0.36	-0.35
NM_001038776|CG3164|chr2L|-	0.63	0.28	-0.35
NM_140547|fwe|chr3L|-	0.54	0.19	-0.35
NM_132425|CG15211|chrX|+	0.63	0.28	-0.35
NM_143770|NAT1|chr2R|+	0.92	0.57	-0.35
NM_141673|Unc-115a|chr3R|-	0.85	0.5	-0.35
NM_165100|vig|chr2L|-	0.56	0.21	-0.35
NR_073632|roX1|chrX|-	0.91	0.56	-0.35
NM_130567|rush|chrX|+	0.74	0.39	-0.35
NM_001103909|CG34198|chr2R|-	0.95	0.6	-0.35
NM_134491|Rcd-1|chrX|+	0.85	0.5	-0.35
NM_165776|CG11777|chr2R|+	1	0.65	-0.35
NM_139575|CG12006|chr3L|+	1	0.65	-0.35
NM_138269|cue|chr3L|-	0.87	0.52	-0.35
NM_168905|Syx7|chr3L|+	0.68	0.33	-0.35
NM_079016|Mdr50|chr2R|+	0.52	0.17	-0.35
NM_164833|Hnf4|chr2L|-	0.47	0.12	-0.35
NM_001169439|Pvr|chr2L|-	0.48	0.13	-0.35
NM_140544|comm2|chr3L|-	1	0.65	-0.35
NM_139414|CG12025|chr3L|+	0.72	0.37	-0.35
NM_165491|koi|chr2R|+	0.93	0.58	-0.35
NM_143519|CG1983|chr3R|-	0.8	0.45	-0.35
NM_057719|Mtor|chr2R|+	1	0.65	-0.35
NM_001144629|CG31145|chr3R|-	0.98	0.63	-0.35
NM_001276041|LpR2|chr3R|-	0.67	0.32	-0.35
NM_001169318|CrebB-17A|chrX|+	0.77	0.42	-0.35
NM_001273095|l(2)k05819|chr2L|+	0.84	0.49	-0.35
NM_166047|Shroom|chr2R|+	0.63	0.28	-0.35
NM_001103837|Shroom|chr2R|+	0.63	0.28	-0.35
NM_001169619|Cirl|chr2R|+	0.89	0.54	-0.35
NM_130477|CG3038|chrX|-	0.97	0.62	-0.35
NM_137327|CG6665|chr2R|+	0.65	0.3	-0.35
NM_206003|Nak|chr2L|-	0.54	0.19	-0.35
NM_079794|Tl|chr3R|+	0.79	0.44	-0.35
NM_079398|TpnC73F|chr3L|+	0.88	0.54	-0.34
NM_001202268|skap|chr3R|+	0.51	0.17	-0.34
NM_132296|CG7033|chrX|+	1	0.66	-0.34
NM_167245|Atg8a|chrX|-	0.69	0.35	-0.34
NM_001274002|Aats-asp|chr2R|+	0.71	0.37	-0.34
NM_001272963|Der-1|chr2L|+	1	0.66	-0.34
NM_170020|CG5315|chr3R|-	0.79	0.45	-0.34
NM_132249|CG1440|chrX|+	0.45	0.11	-0.34
NM_168678|Baldspot|chr3L|-	0.87	0.53	-0.34
NM_001275462|CG9821|chr3R|-	0.88	0.54	-0.34
NM_001202048|hts|chr2R|-	0.48	0.14	-0.34
NM_001275135|HLH106|chr3L|+	0.67	0.33	-0.34
NM_167456|Pis|chrX|-	0.52	0.18	-0.34
NM_001272895|crq|chr2L|-	0.88	0.54	-0.34
NM_135340|CG8668|chr2L|+	1	0.66	-0.34
NM_169036|Hph|chr3R|+	0.77	0.43	-0.34
NM_142463|Vha100-4|chr3R|-	0.57	0.23	-0.34
NM_001259010|Snx6|chr2L|-	0.76	0.42	-0.34
NM_001258628|ogre|chrX|-	0.45	0.11	-0.34
NR_047796|roX2|chrX|+	0.88	0.54	-0.34
NM_206345|CG32103|chr3L|-	0.73	0.39	-0.34
NM_141629|CG8129|chr3R|+	0.61	0.27	-0.34
NM_001260294|Cortactin|chr3R|-	0.77	0.43	-0.34
NM_138026|CG3907|chr2R|-	0.77	0.43	-0.34
NM_168563|CG32137|chr3L|+	0.57	0.23	-0.34
NM_206394|Nedd4|chr3L|+	0.63	0.29	-0.34
NM_057539|Hnf4|chr2L|-	0.46	0.12	-0.34
NM_078715|l(2)gl|chr2L|-	0.58	0.24	-0.34
NM_001273912|Mef2|chr2R|-	1	0.66	-0.34
NM_167830|Ptpmeg|chr3L|+	0.85	0.51	-0.34
NM_001031893|Sxl|chrX|-	0.5	0.16	-0.34
NM_132613|CG4645|chrX|+	0.61	0.27	-0.34
NM_206023|Atf6|chr2R|+	0.88	0.54	-0.34
NM_001103427|pod1|chrX|+	1	0.66	-0.34
NM_164890|CG4839|chr2L|+	0.67	0.33	-0.34
NM_001272672|caz|chrX|+	0.86	0.52	-0.34
NM_140340|Hip1|chr3L|-	0.56	0.22	-0.34
NM_166694|NKAIN|chr2R|+	0.83	0.49	-0.34
NM_165973|Fsn|chr2R|-	0.76	0.42	-0.34
NM_142922|Hrd3|chr3R|-	0.77	0.43	-0.34
NM_137943|CG3493|chr2R|-	0.9	0.56	-0.34
NM_134669|CG11601|chr2L|-	0.66	0.32	-0.34
NM_079310|Nrx-IV|chr3L|+	0.69	0.35	-0.34
NM_137458|Dgp-1|chr2R|-	0.58	0.24	-0.34
NM_176242|grau|chr2R|-	0.96	0.62	-0.34
NM_139505|Sk2|chr3L|+	0.89	0.55	-0.34
NM_079378|Taf4|chr3L|+	0.69	0.35	-0.34
NM_057589|Rbp9|chr2L|+	0.6	0.26	-0.34
NM_001274760|blos4|chr3L|+	0.85	0.51	-0.34
NM_168861|CG32425|chr3L|+	0.71	0.37	-0.34
NM_001274328|CG12084|chr3L|-	0.78	0.44	-0.34
NM_206518|Pk92B|chr3R|+	0.78	0.44	-0.34
NM_057741|Pk92B|chr3R|+	0.78	0.44	-0.34
NM_001273351|tai|chr2L|+	0.76	0.42	-0.34
NM_144349|c11.1|chrX|-	0.63	0.29	-0.34
NM_001170111|hth|chr3R|-	0.69	0.35	-0.34
NM_001043307|CG34133|chr3R|+	0.68	0.34	-0.34
NM_001274751|A2bp1|chr3L|+	0.62	0.28	-0.34
NM_167998|CG32276|chr3L|-	0.69	0.36	-0.33
NM_001275647|His4r|chr3R|+	0.7	0.37	-0.33
NM_167657|l(1)G0156|chrX|-	0.71	0.38	-0.33
NM_167284|Gs2|chrX|+	0.77	0.44	-0.33
NM_001038781|capt|chr2L|-	0.84	0.51	-0.33
NM_001144417|CG10625|chr3L|-	0.59	0.26	-0.33
NM_001169723|CG5174|chr2R|+	0.95	0.62	-0.33
NM_135299|CG7203|chr2L|-	1	0.67	-0.33
NM_139805|CG10077|chr3L|-	1	0.67	-0.33
NM_078585|CkIalpha|chrX|+	0.73	0.4	-0.33
NM_001275461|CG9821|chr3R|-	0.94	0.61	-0.33
NM_079568|RhoL|chr3R|-	0.63	0.3	-0.33
NM_142483|CG7702|chr3R|+	0.96	0.63	-0.33
NR_002097|roX1|chrX|-	0.92	0.59	-0.33
NM_136748|CG17765|chr2R|+	0.77	0.44	-0.33
NM_206339|CG11658|chr3L|-	1	0.67	-0.33
NM_168204|lark|chr3L|+	0.78	0.45	-0.33
NM_001014549|slik|chr2R|-	1	0.67	-0.33
NM_057351|Ras85D|chr3R|-	0.87	0.54	-0.33
NM_137564|Tab2|chr2R|+	1	0.67	-0.33
NM_167778|CG14619|chrX|+	1	0.67	-0.33
NM_141792|CG6672|chr3R|-	0.82	0.49	-0.33
NM_141877|CG18347|chr3R|+	0.8	0.47	-0.33
NM_001169700|CG8963|chr2R|-	0.67	0.34	-0.33
NM_168349|path|chr3L|-	0.64	0.31	-0.33
NM_167146|Ubc-E2H|chrX|-	0.81	0.48	-0.33
NM_001273245|CG13784|chr2L|-	1	0.67	-0.33
NM_176349|nes|chr3L|-	0.66	0.33	-0.33
NM_142580|CG4686|chr3R|+	0.71	0.38	-0.33
NM_057960|fray|chr3R|+	0.73	0.4	-0.33
NM_132633|CG4332|chrX|+	0.99	0.66	-0.33
NM_001169989|Oatp74D|chr3L|+	0.85	0.52	-0.33
NM_142943|CG13603|chr3R|-	0.8	0.47	-0.33
NM_001273913|Mef2|chr2R|-	0.95	0.62	-0.33
NM_001272624|Flo-2|chrX|+	0.5	0.17	-0.33
NM_001103493|Sec16|chrX|+	0.64	0.31	-0.33
NM_001272559|Sec16|chrX|+	0.64	0.31	-0.33
NM_132584|Sec16|chrX|+	0.64	0.31	-0.33
NM_206213|slik|chr2R|-	0.7	0.37	-0.33
NM_001276029|CG33494|chr3R|-	0.46	0.13	-0.33
NM_079535|alpha-Est8|chr3R|-	0.9	0.57	-0.33
NM_001259875|CG9674|chr3L|-	0.48	0.15	-0.33
NM_165518|Eaf|chr2R|-	0.87	0.54	-0.33
NM_167258|CG1637|chrX|-	0.95	0.62	-0.33
NM_132045|CG3033|chrX|-	0.68	0.35	-0.33
NM_001170012|CG32428|chr3L|-	0.62	0.29	-0.33
NM_001259037|SCAR|chr2L|+	0.65	0.32	-0.33
NM_166010|fl(2)d|chr2R|-	0.58	0.25	-0.33
NM_001259847|Dcp2|chr3L|-	0.76	0.43	-0.33
NM_170581|heph|chr3R|-	0.7	0.37	-0.33
NM_058010|Flo-1|chr2R|-	0.47	0.14	-0.33
NM_001274071|Khc-73|chr2R|-	0.44	0.11	-0.33
NM_057953|zf30C|chr2L|+	0.83	0.5	-0.33
NM_136340|gp210|chr2R|+	0.57	0.24	-0.33
NM_001274543|Trn|chr3L|+	0.83	0.5	-0.33
NM_001014633|Rpb4|chr3R|-	0.47	0.14	-0.33
NM_080245|wds|chrX|+	0.73	0.4	-0.33
NM_001169614|Asap1|chr2R|-	0.55	0.22	-0.33
NM_135250|Rab30|chr2L|-	0.62	0.29	-0.33
NM_057863|Ric|chr2R|-	0.73	0.4	-0.33
NM_078805|Dref|chr2L|-	0.53	0.2	-0.33
NM_001272571|hep|chrX|-	0.57	0.24	-0.33
NM_166709|CG30428|chr2R|+	0.81	0.48	-0.33
NM_001272134|Pur-alpha|chr4|+	0.71	0.38	-0.33
NM_138209|Vti1|chr3L|-	0.82	0.49	-0.33
NM_001258805|wupA|chrX|-	0.5	0.18	-0.32
NM_169593|His4r|chr3R|+	0.72	0.4	-0.32
NM_001259708|CG4769|chr3L|+	0.89	0.57	-0.32
NM_001169294|MSBP|chrX|-	0.52	0.2	-0.32
NM_057862|SdhA|chr2R|-	0.78	0.46	-0.32
NM_001202126|Sh3beta|chr3L|-	0.55	0.23	-0.32
NM_001275213|CG12974|chr3L|-	0.79	0.47	-0.32
NM_080220|Rbp2|chrX|+	0.49	0.17	-0.32
NM_134814|l(2)s5379|chr2L|+	0.65	0.33	-0.32
NM_001014689|PMCA|chr4|-	0.49	0.17	-0.32
NM_001014460|l(2)s5379|chr2L|+	0.66	0.34	-0.32
NM_001144563|CG42394|chr3R|+	0.6	0.28	-0.32
NM_139411|Cpr62Bc|chr3L|-	0.92	0.6	-0.32
NM_001144473|Wbp2|chr3L|+	0.49	0.17	-0.32
NM_142586|CG4538|chr3R|-	0.92	0.6	-0.32
NM_142805|bond|chr3R|+	1	0.68	-0.32
NM_132394|CG17841|chrX|+	0.69	0.37	-0.32
NM_142386|CG7523|chr3R|-	0.59	0.27	-0.32
NM_139537|CG17746|chr3L|-	0.79	0.47	-0.32
NM_001274254|Pdk1|chr3L|+	0.52	0.2	-0.32
NM_079701|Mvl|chr3R|-	0.77	0.45	-0.32
NM_001275324|CG9855|chr3R|-	0.77	0.45	-0.32
NM_057472|Vinc|chrX|-	0.85	0.53	-0.32
NM_001273433|UbcD2|chr2L|-	0.37	0.05	-0.32
NM_164639|vri|chr2L|+	0.98	0.66	-0.32
NM_001170213|how|chr3R|+	0.43	0.11	-0.32
NM_080370|ltd|chr2R|-	0.7	0.38	-0.32
NM_167834|hipk|chr3L|+	1	0.68	-0.32
NM_136769|CG7222|chr2R|+	0.65	0.33	-0.32
NM_168385|iPLA2-VIA|chr3L|-	0.63	0.31	-0.32
NM_136332|l(2)NC136|chr2R|-	0.51	0.19	-0.32
NM_079675|dnk|chr3R|+	0.7	0.38	-0.32
NM_142587|RhoGAP92B|chr3R|+	0.66	0.34	-0.32
NM_167178|AP-1gamma|chrX|+	0.66	0.34	-0.32
NM_001258660|AP-1gamma|chrX|+	0.66	0.34	-0.32
NM_176700|cm|chrX|-	0.59	0.27	-0.32
NM_001258661|AP-1gamma|chrX|+	0.66	0.34	-0.32
NM_079137|uzip|chr2R|+	0.55	0.23	-0.32
NM_165218|dl|chr2L|-	0.76	0.44	-0.32
NM_166229|CG14478|chr2R|+	0.83	0.51	-0.32
NM_140768|CG14353|chr3L|+	0.95	0.63	-0.32
NM_133150|out|chrX|-	0.57	0.25	-0.32
NM_001103835|cg|chr2R|+	0.74	0.42	-0.32
NM_176521|mod(mdg4)|chr3R|+	0.73	0.41	-0.32
NM_136256|CG8678|chr2L|-	0.52	0.2	-0.32
NM_136353|tbce|chr2R|+	0.51	0.19	-0.32
NM_001103484|CG34348|chrX|+	0.78	0.46	-0.32
NM_001169621|babo|chr2R|+	0.76	0.44	-0.32
NM_143482|CG15514|chr3R|-	0.85	0.53	-0.32
NM_206004|brat|chr2L|+	0.43	0.11	-0.32
NM_167143|sn|chrX|+	0.77	0.45	-0.32
NM_138268|CG12084|chr3L|-	0.56	0.24	-0.32
NM_001014613|hth|chr3R|-	0.73	0.41	-0.32
NM_132484|Pa1|chrX|+	0.65	0.33	-0.32
NM_165344|CG9328|chr2L|+	0.66	0.34	-0.32
NM_167248|sesB|chrX|-	0.7	0.39	-0.31
NM_142224|CG5399|chr3R|+	0.76	0.45	-0.31
NM_078494|Mlc-c|chrX|-	0.57	0.26	-0.31
NM_057819|nrv1|chr2L|-	0.45	0.14	-0.31
NM_132290|CG7267|chrX|-	0.7	0.39	-0.31
NM_001272235|Actn|chrX|-	0.49	0.18	-0.31
NM_079883|CaMKI|chr4|+	0.42	0.11	-0.31
NM_140871|CG9231|chr3L|-	0.59	0.28	-0.31
NM_165539|CG1600|chr2R|-	0.74	0.43	-0.31
NM_001202030|CG42837|chr2R|+	0.59	0.28	-0.31
NM_140511|CG7272|chr3L|+	0.53	0.22	-0.31
NM_142095|CG12207|chr3R|+	1	0.69	-0.31
NM_139632|CG1319|chr3L|+	0.82	0.51	-0.31
NM_057464|proPO-A1|chr2R|-	0.71	0.4	-0.31
NM_143781|l(2)08717|chr2R|-	0.9	0.59	-0.31
NM_001170279|Men-b|chr3R|+	0.72	0.41	-0.31
NM_140996|Pex14|chr3L|+	0.68	0.37	-0.31
NM_001275749|alt|chr3R|-	0.69	0.38	-0.31
NM_001273991|Amph|chr2R|+	0.64	0.33	-0.31
NM_001274186|Treh|chr2R|+	0.69	0.38	-0.31
NM_079193|Ras64B|chr3L|+	0.5	0.19	-0.31
NM_079974|RabX1|chr2R|-	1	0.69	-0.31
NM_142279|CG10311|chr3R|-	0.7	0.39	-0.31
NM_166240|Rab4|chr2R|+	0.67	0.36	-0.31
NM_142672|CG5630|chr3R|+	0.78	0.47	-0.31
NM_001275561|CG18347|chr3R|+	0.73	0.42	-0.31
NM_001275828|Stat92E|chr3R|-	0.52	0.21	-0.31
NM_001258624|Ctr1A|chrX|+	0.57	0.26	-0.31
NM_001169899|qm|chr3L|+	0.38	0.07	-0.31
NM_167989|CG11537|chr3L|-	0.54	0.23	-0.31
NM_132029|CG15771|chrX|+	0.66	0.35	-0.31
NM_080048|L|chr2R|+	0.83	0.52	-0.31
NM_001258911|CG18317|chr2L|-	0.71	0.4	-0.31
NM_001014624|btsz|chr3R|-	1	0.69	-0.31
NM_001042873|pgant5|chr2L|-	0.52	0.21	-0.31
NM_165938|CG42708|chr2R|-	0.52	0.21	-0.31
NM_137251|clu|chr2R|+	0.82	0.51	-0.31
NM_205915|frj|chr2L|+	0.78	0.47	-0.31
NM_001260202|msps|chr3R|+	1	0.69	-0.31
NM_136773|CG12343|chr2R|-	0.67	0.36	-0.31
NM_134991|MFS18|chr2L|-	0.89	0.58	-0.31
NM_165663|ltd|chr2R|-	0.7	0.39	-0.31
NM_001258639|Rab39|chrX|+	0.51	0.2	-0.31
NM_137236|casp|chr2R|-	0.67	0.36	-0.31
NM_001272891|Ent1|chr2L|-	0.47	0.16	-0.31
NM_165921|Galpha49B|chr2R|+	0.75	0.44	-0.31
NM_138052|CG3356|chr2R|+	0.8	0.49	-0.31
NM_001144320|vri|chr2L|+	0.96	0.65	-0.31
NM_001202345|4EHP|chr3R|-	0.67	0.36	-0.31
NM_001276054|CG31324|chr3R|+	0.45	0.14	-0.31
NM_165463|EcR|chr2R|-	0.37	0.06	-0.31
NM_001275364|MTA1-like|chr3R|-	0.67	0.36	-0.31
NM_142399|CG7379|chr3R|-	0.81	0.5	-0.31
NM_001275293|jim|chr3L|-	0.82	0.51	-0.31
NM_168964|jim|chr3L|-	0.82	0.51	-0.31
NM_001274014|CG17724|chr2R|-	0.88	0.57	-0.31
NM_079581|TfIIFbeta|chr3R|-	0.61	0.3	-0.31
NM_001169477|Ast-C|chr2L|-	0.4	0.09	-0.31
NM_001276155|CG15514|chr3R|-	0.81	0.5	-0.31
NM_206068|CG12128|chr2R|+	0.76	0.45	-0.31
NM_001273136|CG34126|chr2L|+	0.67	0.36	-0.31
NM_001273973|CG9003|chr2R|-	0.7	0.39	-0.31
NM_132052|CG12728|chrX|+	0.78	0.47	-0.31
NM_167247|sesB|chrX|-	0.69	0.39	-0.3
NM_001258803|wupA|chrX|-	0.48	0.18	-0.3
NM_132968|CG5010|chrX|+	1	0.7	-0.3
NM_057271|Lcp1|chr2R|-	0.74	0.44	-0.3
NM_001275151|RhoGDI|chr3L|+	0.65	0.35	-0.3
NM_001275099|CG18135|chr3L|-	0.94	0.64	-0.3
NM_206316|CG33493|chr3L|-	0.96	0.66	-0.3
NM_167332|CkIalpha|chrX|+	0.93	0.63	-0.3
NM_142026|Droj2|chr3R|+	0.79	0.49	-0.3
NM_140927|Ssk|chr3L|+	0.68	0.38	-0.3
NM_166704|zip|chr2R|-	0.39	0.09	-0.3
NM_168851|fbl|chr3L|+	0.58	0.28	-0.3
NM_142926|Lsd-1|chr3R|+	0.45	0.15	-0.3
NM_001272608|Clic|chrX|-	0.52	0.22	-0.3
NM_001169354|bt|chr4|+	0.48	0.18	-0.3
NM_165554|CG18812|chr2R|-	0.43	0.13	-0.3
NM_079020|Dro|chr2R|+	0.46	0.16	-0.3
NM_080041|msk|chr3L|+	0.78	0.48	-0.3
NM_001201926|fok|chr2L|-	0.71	0.41	-0.3
NM_165678|Not1|chr2R|-	0.94	0.64	-0.3
NM_170296|CG6330|chr3R|-	0.73	0.43	-0.3
NM_137199|GalNAc-T1|chr2R|+	0.94	0.64	-0.3
NM_137004|CG4646|chr2R|-	0.9	0.6	-0.3
NM_057895|crol|chr2L|-	1	0.7	-0.3
NM_001170306|tmod|chr3R|+	0.62	0.32	-0.3
NM_166198|Dek|chr2R|+	0.75	0.45	-0.3
NM_140987|Rcd2|chr3L|-	1	0.7	-0.3
NM_079176|kst|chr3L|+	0.63	0.33	-0.3
NM_167795|Pdk1|chr3L|+	0.91	0.61	-0.3
NM_001274422|prominin-like|chr3L|-	0.99	0.69	-0.3
NM_058106|Aac11|chr2L|-	0.67	0.37	-0.3
NM_167348|CG32638|chrX|-	0.51	0.21	-0.3
NM_057634|pelo|chr2L|+	0.43	0.13	-0.3
NM_001258482|Crk|chr4|+	0.61	0.31	-0.3
NM_165974|Dp|chr2R|+	0.7	0.4	-0.3
NM_001014612|CG8481|chr3R|+	0.77	0.47	-0.3
NM_001169962|Atg1|chr3L|-	1	0.7	-0.3
NM_140984|CG5104|chr3L|+	0.85	0.55	-0.3
NM_141438|CG10068|chr3R|-	0.49	0.19	-0.3
NM_001259384|shot|chr2R|-	0.68	0.38	-0.3
NM_140829|CG6812|chr3L|+	0.57	0.27	-0.3
NM_167094|pod1|chrX|+	1	0.7	-0.3
NM_143639|CG2118|chr3R|-	0.52	0.22	-0.3
NM_141832|wkd|chr3R|+	0.83	0.53	-0.3
NM_134881|CG2991|chr2L|+	0.84	0.54	-0.3
NM_169034|CG12163|chr3R|-	0.82	0.52	-0.3
NM_001273852|Vps13|chr2R|+	0.87	0.57	-0.3
NM_001015121|rl|chr2RHet|+	0.36	0.06	-0.3
NM_130663|Csat|chrX|-	0.88	0.58	-0.3
NM_169187|alpha-Est9|chr3R|-	0.9	0.6	-0.3
NM_167346|hep|chrX|-	1	0.7	-0.3
NM_001042942|CG17715|chr2L|+	0.41	0.11	-0.3
NM_001169586|vlc|chr2R|+	0.71	0.41	-0.3
NM_001031933|CG33232|chr3L|+	0.59	0.29	-0.3
NM_168513|Hip1|chr3L|-	0.6	0.3	-0.3
NM_132676|tth|chrX|-	0.68	0.38	-0.3
NM_001273193|stai|chr2L|+	0.58	0.28	-0.3
NM_168710|CG6664|chr3L|-	0.77	0.47	-0.3
NM_134647|Nhe1|chr2L|-	0.68	0.38	-0.3
NM_169894|CG42668|chr3R|+	0.9	0.6	-0.3
NM_001202300|CG32856|chr3R|-	0.8	0.5	-0.3
NM_206177|par-1|chr2R|+	0.79	0.49	-0.3
NM_001272388|CG42593|chrX|+	0.48	0.18	-0.3
NM_001259176|CG31688|chr2L|+	0.89	0.59	-0.3
NM_001144486|Taf4|chr3L|+	0.7	0.4	-0.3
NM_136623|Rme-8|chr2R|-	0.56	0.26	-0.3
NM_001043241|CG42327|chr3R|+	0.61	0.31	-0.3
NM_001104344|Fas1|chr3R|+	0.75	0.45	-0.3
NM_078818|Ast-C|chr2L|-	0.4	0.1	-0.3
NM_137621|CG10444|chr2R|-	0.83	0.53	-0.3
NM_138119|CG3894|chr2R|+	0.86	0.56	-0.3
NM_001259256|CG43340|chr2R|+	0.76	0.46	-0.3
NM_170247|Lnk|chr3R|+	0.47	0.17	-0.3
NM_001258729|g|chrX|-	0.54	0.24	-0.3
NM_001272243|Unc-76|chrX|+	0.55	0.25	-0.3
NM_168284|Zasp66|chr3L|+	0.48	0.19	-0.29
NM_138218|CG13887|chr3L|+	0.6	0.31	-0.29
NM_168852|fbl|chr3L|+	0.99	0.7	-0.29
NM_001169715|lolal|chr2R|-	1	0.71	-0.29
NM_132768|Lsd-2|chrX|-	0.78	0.49	-0.29
NM_165494|coro|chr2R|-	0.77	0.48	-0.29
NM_001015321|eIF-4B|chr2RHet|+	0.69	0.4	-0.29
NM_136509|CG18316|chr2R|+	1	0.71	-0.29
NM_137156|Cyp6a23|chr2R|+	0.61	0.32	-0.29
NM_001258849|obst-A|chrX|+	0.81	0.52	-0.29
NM_136588|CG8229|chr2R|-	0.81	0.52	-0.29
NM_001274318|Rac1|chr3L|-	0.79	0.5	-0.29
NM_001260074|RhoL|chr3R|-	0.5	0.21	-0.29
NM_136618|shrb|chr2R|-	0.67	0.38	-0.29
NM_057861|T3dh|chr2R|-	0.4	0.11	-0.29
NM_001014688|PMCA|chr4|-	0.49	0.2	-0.29
NM_001272384|Tom40|chrX|+	0.61	0.32	-0.29
NM_168114|shep|chr3L|-	0.57	0.28	-0.29
NM_001104414|Ir|chr3R|+	0.86	0.57	-0.29
NM_001275816|CG4562|chr3R|-	0.46	0.17	-0.29
NM_001272215|CG14812|chrX|-	0.72	0.43	-0.29
NM_136917|garz|chr2R|+	1	0.71	-0.29
NM_078989|Lac|chr2R|+	0.87	0.58	-0.29
NM_001170018|CG7611|chr3L|+	0.73	0.44	-0.29
NM_001170003|Gyc76C|chr3L|-	0.96	0.67	-0.29
NM_143073|veli|chr3R|-	0.51	0.22	-0.29
NM_001275893|how|chr3R|+	0.38	0.09	-0.29
NM_166123|Mlf|chr2R|-	0.56	0.27	-0.29
NM_057633|dia|chr2L|+	0.43	0.14	-0.29
NM_001104224|Gasp|chr3R|-	0.46	0.17	-0.29
NM_001170212|how|chr3R|+	0.38	0.09	-0.29
NM_001260108|Tsp86D|chr3R|+	1	0.71	-0.29
NM_001274864|ste14|chr3L|+	0.92	0.63	-0.29
NM_140699|rogdi|chr3L|+	0.78	0.49	-0.29
NM_142122|l(3)L1231|chr3R|-	1	0.71	-0.29
NM_143343|mfrn|chr3R|-	0.64	0.35	-0.29
NM_141199|CG1103|chr3R|+	0.8	0.51	-0.29
NM_001014538|CG10737|chr2R|+	0.65	0.36	-0.29
NM_136264|nrv3|chr2L|+	0.61	0.32	-0.29
NM_139382|CG13920|chr3L|+	1	0.71	-0.29
NM_141204|Cont|chr3R|+	0.67	0.38	-0.29
NM_165058|CG31731|chr2L|+	0.57	0.28	-0.29
NM_165655|CG30344|chr2R|+	0.45	0.16	-0.29
NM_001169555|sky|chr2L|-	0.65	0.36	-0.29
NM_134916|CG9663|chr2L|-	1	0.71	-0.29
NM_001260285|Calx|chr3R|+	0.53	0.24	-0.29
NM_170297|Tsp97E|chr3R|-	0.56	0.27	-0.29
NM_079699|Calx|chr3R|+	0.54	0.25	-0.29
NM_001275354|PEK|chr3R|-	0.71	0.42	-0.29
NM_167821|mthl14|chr3L|+	0.43	0.14	-0.29
NM_080297|Rbf|chrX|-	0.59	0.3	-0.29
NM_167514|CG9992|chrX|-	0.63	0.34	-0.29
NM_170646|pyd|chr3R|-	0.44	0.15	-0.29
NM_001144533|CG43427|chr3R|+	0.43	0.14	-0.29
NM_170151|CG13624|chr3R|-	0.46	0.17	-0.29
NM_001104092|MTF-1|chr3L|+	0.79	0.5	-0.29
NM_001258702|CG43154|chrX|+	0.65	0.36	-0.29
NM_001274324|Ptp61F|chr3L|-	0.56	0.27	-0.29
NM_001042870|CG34126|chr2L|+	0.64	0.35	-0.29
NM_140969|CG5910|chr3L|+	0.77	0.48	-0.29
NM_143410|alpha-Man-Ib|chr3R|-	0.73	0.44	-0.29
NM_134840|CG9886|chr2L|+	0.8	0.51	-0.29
NM_057377|sina|chr3L|+	0.78	0.49	-0.29
NM_001144599|PP2A-B'|chr3R|+	0.61	0.32	-0.29
NR_002020|alphagamma-element:CR32865|chr3R|-	0.66	0.38	-0.28
NM_164617|Cg25C|chr2L|+	0.98	0.7	-0.28
NM_141070|VhaM9.7-b|chr3L|+	0.57	0.29	-0.28
NM_079057|Dp1|chr2R|+	0.59	0.31	-0.28
NM_078595|ben|chrX|+	0.39	0.11	-0.28
NM_001272611|ben|chrX|+	0.39	0.11	-0.28
NM_139702|Uev1A|chr3L|-	0.41	0.13	-0.28
NM_140185|CG14143|chr3L|+	1	0.72	-0.28
NM_057246|ifc|chr2L|+	0.71	0.43	-0.28
NM_001272903|cbt|chr2L|-	1	0.72	-0.28
NM_001273814|coro|chr2R|-	0.77	0.49	-0.28
NM_001276223|sip3|chr3R|+	1	0.72	-0.28
NM_001272731|beta-Spec|chrX|+	0.44	0.16	-0.28
NM_001273990|Amph|chr2R|+	0.59	0.31	-0.28
NM_136209|CG9318|chr2L|-	0.74	0.46	-0.28
NM_001272455|Hex-A|chrX|+	0.73	0.45	-0.28
NM_168389|CG6707|chr3L|-	0.82	0.54	-0.28
NM_001103667|CG34159|chr2L|-	0.56	0.28	-0.28
NM_001259707|shep|chr3L|-	0.54	0.26	-0.28
NM_140308|CG4300|chr3L|-	0.93	0.65	-0.28
NM_166482|Tango11|chr2R|-	0.8	0.52	-0.28
NM_079053|Rab4|chr2R|+	0.71	0.43	-0.28
NM_079080|MESK2|chr2R|+	0.41	0.13	-0.28
NM_139465|CG16762|chr3L|-	0.86	0.58	-0.28
NM_001274637|Atg18|chr3L|+	0.92	0.64	-0.28
NM_001259309|CAP|chr2R|+	0.71	0.43	-0.28
NM_080155|betaggt-II|chr2L|+	0.93	0.65	-0.28
NM_079760|Pp1alpha-96A|chr3R|+	0.84	0.56	-0.28
NM_079242|RNaseX25|chr3L|+	0.45	0.17	-0.28
NM_078914|Tsp42El|chr2R|+	0.4	0.12	-0.28
NM_166033|CG18324|chr2R|+	0.98	0.7	-0.28
NR_002105|roX2|chrX|+	0.69	0.41	-0.28
NM_165906|Lac|chr2R|+	0.86	0.58	-0.28
NM_137747|CG15673|chr2R|-	1	0.72	-0.28
NM_141346|CG2017|chr3R|-	0.78	0.5	-0.28
NM_079433|nes|chr3L|-	0.62	0.34	-0.28
NM_001169693|Mlf|chr2R|-	0.56	0.28	-0.28
NM_001272407|Nrg|chrX|+	0.78	0.5	-0.28
NM_135724|Oatp33Ea|chr2L|-	0.74	0.46	-0.28
NM_166787|myo|chr4|-	0.53	0.25	-0.28
NM_001169679|shot|chr2R|-	0.59	0.31	-0.28
NM_142288|Pak3|chr3R|-	0.7	0.42	-0.28
NM_165368|Mio|chr2L|-	0.7	0.42	-0.28
NM_134318|TBPH|chr2R|-	0.36	0.08	-0.28
NM_001202243|ctrip|chr3R|-	0.46	0.18	-0.28
NM_141206|CG9855|chr3R|-	0.79	0.51	-0.28
NM_001259385|AGO1|chr2R|-	0.53	0.25	-0.28
NM_165770|RanBPM|chr2R|+	0.68	0.4	-0.28
NM_136741|RanBPM|chr2R|+	0.69	0.41	-0.28
NM_136091|Acn|chr2L|+	0.59	0.31	-0.28
NM_130563|pck|chrX|+	0.88	0.6	-0.28
NM_001273085|ed|chr2L|+	1	0.72	-0.28
NM_001273382|Dref|chr2L|-	0.91	0.63	-0.28
NM_175976|tkv|chr2L|-	0.84	0.56	-0.28
NM_153771|CG8920|chr2R|+	0.69	0.41	-0.28
NM_001104031|Cip4|chr3L|-	0.79	0.51	-0.28
NM_001201955|Lpin|chr2R|-	0.86	0.58	-0.28
NM_001272978|AIF|chr2L|+	0.66	0.38	-0.28
NM_001259531|qkr58E-3|chr2R|-	0.45	0.17	-0.28
NM_001272275|dm|chrX|+	0.45	0.17	-0.28
NM_057958|qkr58E-3|chr2R|-	0.52	0.24	-0.28
NM_136408|Cyp6u1|chr2R|-	0.69	0.41	-0.28
NM_001274656|foi|chr3L|+	0.68	0.4	-0.28
NM_001275319|cpx|chr3R|+	0.44	0.16	-0.28
NM_136066|CG17323|chr2L|+	0.62	0.34	-0.28
NM_001014603|cpx|chr3R|+	0.36	0.08	-0.28
NM_130729|CG2938|chrX|-	0.91	0.63	-0.28
NM_165815|fbl6|chr2R|-	0.53	0.25	-0.28
NM_168472|Bmcp|chr3L|+	0.54	0.26	-0.28
NM_001104090|MTF-1|chr3L|+	0.78	0.5	-0.28
NM_168653|CG32152|chr3L|-	0.59	0.31	-0.28
NM_169714|CG14879|chr3R|-	0.5	0.22	-0.28
NM_001201794|CG13384|chr2L|+	0.64	0.36	-0.28
NM_001274300|CG32479|chr3L|+	0.57	0.29	-0.28
NM_143437|CG2310|chr3R|-	0.76	0.48	-0.28
NM_165462|EcR|chr2R|-	0.69	0.41	-0.28
NM_165816|fbl6|chr2R|-	0.53	0.25	-0.28
NM_132046|CG3016|chrX|-	0.79	0.51	-0.28
NM_001170151|wah|chr3R|+	0.78	0.5	-0.28
NM_001038806|CG6144|chr2L|+	0.83	0.55	-0.28
NM_080113|rap|chrX|-	0.66	0.38	-0.28
NM_138034|eIF-5A|chr2R|+	0.55	0.28	-0.27
NM_169615|Mf|chr3R|-	0.45	0.18	-0.27
NM_165865|Oda|chr2R|-	0.5	0.23	-0.27
NM_164615|Cg25C|chr2L|+	1	0.73	-0.27
NM_001104198|Arf79F|chr3L|-	0.55	0.28	-0.27
NM_080343|Moe|chrX|-	0.74	0.47	-0.27
NM_001272665|Nipsnap|chrX|-	0.44	0.17	-0.27
NM_001274266|Tudor-SN|chr3L|-	0.55	0.28	-0.27
NM_144143|CG14767|chr2R|-	1	0.73	-0.27
NM_001014512|Acsl|chr2R|+	0.45	0.18	-0.27
NM_141264|CG12163|chr3R|-	0.69	0.42	-0.27
NM_167565|Fim|chrX|-	0.38	0.11	-0.27
NM_141354|Gasp|chr3R|-	0.85	0.58	-0.27
NM_001275890|CG6455|chr3R|-	0.9	0.63	-0.27
NM_001272803|Pmp70|chrX|+	0.88	0.61	-0.27
NM_001144412|CG12607|chr3L|+	1	0.73	-0.27
NM_001110995|Gfat1|chr3RHet|+	0.74	0.47	-0.27
NM_165746|Pfk|chr2R|+	0.48	0.21	-0.27
NM_079385|Mipp1|chr3L|-	0.71	0.44	-0.27
NM_057510|drk|chr2R|-	0.52	0.25	-0.27
NM_001202384|CG7816|chr3R|-	0.49	0.22	-0.27
NM_001259064|crol|chr2L|-	1	0.73	-0.27
NM_001273464|crol|chr2L|-	1	0.73	-0.27
NM_134508|parvin|chrX|+	0.77	0.5	-0.27
NM_130590|CG14812|chrX|-	0.79	0.52	-0.27
NM_001169857|CG1317|chr3L|-	1	0.73	-0.27
NM_137728|CG30392|chr2R|-	0.55	0.28	-0.27
NM_140281|Pop2|chr3L|-	0.67	0.4	-0.27
NM_168157|l(3)mbn|chr3L|-	1	0.73	-0.27
NM_001276016|CG11791|chr3R|+	0.55	0.28	-0.27
NM_165038|CG31729|chr2L|+	0.38	0.11	-0.27
NM_135943|CG5869|chr2L|-	0.38	0.11	-0.27
NM_141660|bocksbeutel|chr3R|-	1	0.73	-0.27
NM_142081|twf|chr3R|+	0.85	0.58	-0.27
NM_001043111|klar|chr3L|-	0.92	0.65	-0.27
NM_170652|Esyt2|chr3R|+	0.57	0.3	-0.27
NM_140840|Max|chr3L|-	0.72	0.45	-0.27
NM_001260165|CG43179|chr3R|+	0.42	0.15	-0.27
NM_001170085|Pif1A|chr3R|-	0.76	0.49	-0.27
NM_167114|Sxl|chrX|-	0.47	0.2	-0.27
NM_001169561|Mio|chr2L|-	0.69	0.42	-0.27
NM_001103872|CG30463|chr2R|-	0.68	0.41	-0.27
NM_169789|PP2A-B'|chr3R|+	1	0.73	-0.27
NM_140055|Bet3|chr3L|-	0.47	0.2	-0.27
NM_001272441|Bx42|chrX|-	0.61	0.34	-0.27
NM_140400|CG10083|chr3L|-	0.61	0.34	-0.27
NM_001273329|Acer|chr2L|+	0.37	0.1	-0.27
NM_001273938|RanBPM|chr2R|+	0.73	0.46	-0.27
NM_001260456|CG12054|chr3R|+	0.5	0.23	-0.27
NM_166935|CG2924|chrX|-	0.72	0.45	-0.27
NM_141239|ctrip|chr3R|-	0.52	0.25	-0.27
NM_176685|CG33080|chrX|-	0.67	0.4	-0.27
NM_001202143|Fhos|chr3L|+	0.48	0.21	-0.27
NM_167827|fwd|chr3L|-	0.84	0.57	-0.27
NM_137976|CG4091|chr2R|-	0.82	0.55	-0.27
NM_001275906|mats|chr3R|+	0.56	0.29	-0.27
NM_143550|jdp|chr3R|-	0.49	0.22	-0.27
NM_001104459|LpR2|chr3R|-	0.33	0.06	-0.27
NM_168009|ckd|chr3L|+	0.51	0.24	-0.27
NM_001170316|heph|chr3R|-	0.58	0.31	-0.27
NM_170033|loco|chr3R|-	0.75	0.48	-0.27
NM_001272583|CG1622|chrX|+	0.87	0.6	-0.27
NM_001272916|dock|chr2L|+	0.84	0.57	-0.27
NM_134617|CG14614|chrX|-	0.72	0.45	-0.27
NM_001260255|CG14299|chr3R|-	0.84	0.57	-0.27
NM_001169231|CG12125|chrX|-	0.85	0.58	-0.27
NM_166408|Fem-1|chr2R|-	0.54	0.27	-0.27
NM_206287|smid|chr3L|+	0.5	0.23	-0.27
NM_057969|RhoGEF2|chr2R|+	0.58	0.31	-0.27
NM_132018|CG3149|chrX|-	0.46	0.19	-0.27
NM_139532|CG14967|chr3L|-	0.88	0.61	-0.27
NM_057843|vri|chr2L|+	0.75	0.48	-0.27
NM_001104472|spz|chr3R|-	0.53	0.26	-0.27
NM_170331|CG5938|chr3R|+	0.7	0.43	-0.27
NM_166238|CG4853|chr2R|+	0.42	0.15	-0.27
NM_139905|CG8111|chr3L|-	0.64	0.37	-0.27
NM_167293|CG2371|chrX|-	0.63	0.36	-0.27
NM_139914|CG7565|chr3L|-	0.49	0.22	-0.27
NM_001014725|Act5C|chrX|+	0.89	0.63	-0.26
NM_001014726|Act5C|chrX|+	0.77	0.51	-0.26
NM_057668|chic|chr2L|-	0.59	0.33	-0.26
NM_143753|VhaPPA1-1|chr3R|-	0.77	0.51	-0.26
NM_057701|Gp150|chr2R|+	1	0.74	-0.26
NM_079989|eIF-1A|chr3R|+	0.53	0.27	-0.26
NM_169167|CG1943|chr3R|+	1	0.74	-0.26
NM_001274111|GstS1|chr2R|-	0.43	0.17	-0.26
NM_142610|CG5023|chr3R|+	0.75	0.49	-0.26
NM_057874|Surf4|chr3R|-	0.59	0.33	-0.26
NM_001014567|CG33523|chr3L|+	1	0.74	-0.26
NM_134534|obst-A|chrX|+	0.37	0.11	-0.26
NM_079145|Mtch|chr3L|+	0.87	0.61	-0.26
NM_001274025|bbc|chr2R|-	1	0.74	-0.26
NM_166783|gw|chr4|-	0.35	0.09	-0.26
NM_132577|CG2556|chrX|+	0.73	0.47	-0.26
NM_001169876|CG15012|chr3L|-	0.66	0.4	-0.26
NM_166946|egh|chrX|+	1	0.74	-0.26
NM_001274814|RhoGAP68F|chr3L|+	0.86	0.6	-0.26
NM_001273805|Eb1|chr2R|+	0.51	0.25	-0.26
NM_001273239|x16|chr2L|-	1	0.74	-0.26
NM_143711|Ref1|chr3R|-	0.76	0.5	-0.26
NM_001259586|CG2765|chr2R|-	0.67	0.41	-0.26
NM_001103982|CG2765|chr2R|-	0.67	0.41	-0.26
NM_167984|CG11486|chr3L|+	0.87	0.61	-0.26
NM_001202230|P5CDh1|chr3L|-	0.39	0.13	-0.26
NM_057460|Dpt|chr2R|+	0.49	0.23	-0.26
NM_142068|rdx|chr3R|-	0.37	0.11	-0.26
NM_139770|loj|chr3L|+	0.73	0.47	-0.26
NM_001272988|gho|chr2L|-	0.37	0.11	-0.26
NM_080765|milt|chr2L|+	0.74	0.48	-0.26
NM_138078|Letm1|chr2R|-	0.74	0.48	-0.26
NM_080527|drm|chr2L|+	1	0.74	-0.26
NM_001274052|NaPi-T|chr2R|-	0.64	0.38	-0.26
NM_143555|CG9717|chr3R|-	0.88	0.62	-0.26
NM_079942|Pak|chr3R|+	0.41	0.15	-0.26
NM_001144541|Pak|chr3R|+	0.46	0.2	-0.26
NM_141283|CG12162|chr3R|+	0.92	0.66	-0.26
NM_079259|dally|chr3L|+	1	0.74	-0.26
NM_140325|vih|chr3L|+	0.59	0.33	-0.26
NM_001274404|msn|chr3L|-	0.67	0.41	-0.26
NM_145335|mthl3|chr2R|-	0.67	0.41	-0.26
NM_169054|CG12162|chr3R|+	0.87	0.61	-0.26
NM_057922|Pi3K21B|chr2L|+	0.58	0.32	-0.26
NM_144348|c12.1|chrX|-	0.82	0.56	-0.26
NM_130547|CG11412|chrX|+	0.9	0.64	-0.26
NM_166021|AGO1|chr2R|-	0.52	0.26	-0.26
NM_164825|Dh31|chr2L|-	0.36	0.1	-0.26
NM_001038922|nuf|chr3L|+	0.45	0.19	-0.26
NM_057603|140up|chr3R|-	0.92	0.66	-0.26
NM_142189|CG6236|chr3R|-	0.83	0.57	-0.26
NM_165351|sky|chr2L|-	0.47	0.21	-0.26
NM_167012|Cbp80|chrX|+	0.85	0.59	-0.26
NM_057682|cin|chrX|+	0.38	0.12	-0.26
NM_140096|Naa60|chr3L|+	0.93	0.67	-0.26
NM_142278|CG14879|chr3R|-	0.45	0.19	-0.26
NM_142389|CG7655|chr3R|+	0.64	0.38	-0.26
NM_143099|CG10420|chr3R|-	0.86	0.6	-0.26
NM_057349|pyd|chr3R|-	0.39	0.13	-0.26
NM_139776|CG10289|chr3L|-	0.43	0.17	-0.26
NM_079990|Sara|chr2R|+	0.45	0.19	-0.26
NM_001273220|GRHR|chr2L|-	0.73	0.47	-0.26
NM_133097|CG6961|chrX|-	0.52	0.26	-0.26
NM_001273974|Mtor|chr2R|+	0.42	0.16	-0.26
NM_140629|roq|chr3L|-	0.65	0.39	-0.26
NM_079230|corn|chr3L|-	0.53	0.27	-0.26
NM_057277|Mal-A2|chr2R|+	0.49	0.23	-0.26
NM_001272397|sdt|chrX|+	0.55	0.29	-0.26
NM_001104477|CG5938|chr3R|+	0.69	0.43	-0.26
NM_057628|dock|chr2L|+	0.69	0.43	-0.26
NM_136200|bru|chr2L|-	0.81	0.55	-0.26
NM_001104144|Mbs|chr3L|+	0.62	0.36	-0.26
NM_078857|heix|chr2L|-	0.56	0.3	-0.26
NM_132510|CG2371|chrX|-	0.68	0.42	-0.26
NM_001274230|TM4SF|chr2R|+	0.59	0.33	-0.26
NM_079158|LysB|chr3L|+	1	0.75	-0.25
NM_168291|Prm|chr3L|-	0.49	0.24	-0.25
NM_001276217|CycG|chr3R|-	0.59	0.34	-0.25
NM_134493|Sec61gamma|chrX|+	0.54	0.29	-0.25
NM_136213|Pomp|chr2L|+	0.31	0.06	-0.25
NM_206669|Moe|chrX|-	0.86	0.61	-0.25
NM_135274|CG5261|chr2L|+	0.51	0.26	-0.25
NM_134904|CG3523|chr2L|+	0.75	0.5	-0.25
NM_078502|sqh|chrX|-	0.58	0.33	-0.25
NM_001014511|Acsl|chr2R|+	0.39	0.14	-0.25
NM_176347|CG18135|chr3L|-	0.92	0.67	-0.25
NM_141118|CG7470|chr3L|+	0.91	0.66	-0.25
NM_001259596|Mtch|chr3L|+	0.83	0.58	-0.25
NM_132511|CG2444|chrX|-	0.61	0.36	-0.25
NM_001275624|CG9297|chr3R|+	0.89	0.64	-0.25
NM_079608|Past1|chr3R|+	0.66	0.41	-0.25
NM_167104|Inx2|chrX|+	0.31	0.06	-0.25
NM_079502|Karybeta3|chr3R|+	0.53	0.28	-0.25
NM_170009|lqfR|chr3R|+	1	0.75	-0.25
NM_001170100|CG9399|chr3R|-	0.89	0.64	-0.25
NM_135769|Pect|chr2L|+	0.51	0.26	-0.25
NM_079541|alpha-Est5|chr3R|-	0.84	0.59	-0.25
NM_057602|Rac1|chr3L|-	0.73	0.48	-0.25
NM_134771|CG18317|chr2L|-	1	0.75	-0.25
NM_168032|CG32267|chr3L|-	0.76	0.51	-0.25
NM_138221|CG13890|chr3L|+	0.62	0.37	-0.25
NM_057666|La|chr2L|-	0.56	0.31	-0.25
NM_166310|CG15096|chr2R|-	0.54	0.29	-0.25
NM_164718|x16|chr2L|-	1	0.75	-0.25
NM_140802|Aut1|chr3L|+	0.9	0.65	-0.25
NM_141492|CG2846|chr3R|-	0.47	0.22	-0.25
NM_001272561|Tis11|chrX|+	0.43	0.18	-0.25
NM_168556|Liprin-beta|chr3L|+	1	0.75	-0.25
NM_001260344|AP-1sigma|chr3R|+	0.87	0.62	-0.25
NM_169331|tws|chr3R|-	0.84	0.59	-0.25
NM_001273962|Drip|chr2R|-	0.65	0.4	-0.25
NM_137118|CG17385|chr2R|-	0.76	0.51	-0.25
NM_001042939|CG40439|chr2L|-	0.66	0.41	-0.25
NM_001276121|Inx3|chr3R|-	0.73	0.48	-0.25
NM_165968|Spt-I|chr2R|+	0.53	0.28	-0.25
NM_142296|Der-2|chr3R|-	0.75	0.5	-0.25
NM_167949|CG42669|chr3L|+	0.98	0.73	-0.25
NM_143801|Dek|chr2R|+	0.68	0.43	-0.25
NM_166771|Ephrin|chr4|+	0.38	0.13	-0.25
NM_144464|CG18508|chrX|-	0.47	0.22	-0.25
NM_132909|CG9782|chrX|-	0.86	0.61	-0.25
NM_001272526|bif|chrX|+	0.43	0.18	-0.25
NM_133127|CG7453|chrX|+	0.92	0.67	-0.25
NM_135402|PrBP|chr2L|-	0.58	0.33	-0.25
NM_057814|lic|chrX|+	0.97	0.72	-0.25
NM_058100|Stam|chr2L|+	0.77	0.52	-0.25
NM_206598|svr|chrX|+	0.56	0.31	-0.25
NM_057823|Rab14|chr2L|+	0.73	0.48	-0.25
NM_141252|CG1124|chr3R|+	0.44	0.19	-0.25
NM_142640|CG16953|chr3R|-	0.81	0.56	-0.25
NM_001274983|CG5830|chr3L|-	0.56	0.31	-0.25
NM_165949|Dgkepsilon|chr2R|+	0.99	0.74	-0.25
NM_139503|CG2162|chr3L|+	0.65	0.4	-0.25
NM_130600|CG14806|chrX|+	0.61	0.36	-0.25
NM_079922|CdsA|chr3L|+	0.69	0.44	-0.25
NM_166623|egl|chr2R|-	0.84	0.59	-0.25
NM_134990|Elp3|chr2L|+	1	0.75	-0.25
NM_136273|Cul-2|chr2L|+	0.61	0.36	-0.25
NM_080084|spin|chr2R|+	0.58	0.33	-0.25
NM_166390|CG8929|chr2R|+	0.91	0.66	-0.25
NM_167986|prominin-like|chr3L|-	0.75	0.5	-0.25
NM_001259984|CG43427|chr3R|+	0.37	0.12	-0.25
NM_001170319|heph|chr3R|-	0.58	0.33	-0.25
NM_001273132|betaggt-I|chr2L|+	0.72	0.47	-0.25
NM_176557|mask|chr3R|+	0.66	0.41	-0.25
NM_166605|CG30411|chr2R|+	0.42	0.17	-0.25
NM_001274650|Unr|chr3L|-	0.73	0.48	-0.25
NM_001275841|Pi3K92E|chr3R|-	0.63	0.38	-0.25
NM_136858|CG13192|chr2R|+	0.52	0.27	-0.25
NM_001103487|CG15221|chrX|+	0.38	0.13	-0.25
NM_001273222|homer|chr2L|-	0.79	0.54	-0.25
NM_001275438|Ada2b|chr3R|-	0.5	0.25	-0.25
NM_132946|CG9104|chrX|-	0.88	0.63	-0.25
NM_001274541|CG10289|chr3L|-	0.51	0.26	-0.25
NM_143627|CG11563|chr3R|+	0.86	0.61	-0.25
NM_141738|Bruce|chr3R|-	0.62	0.37	-0.25
NM_001275684|wah|chr3R|+	0.73	0.48	-0.25
NM_001274338|CG12104|chr3L|-	0.72	0.47	-0.25
NM_001103801|CG9003|chr2R|-	0.59	0.34	-0.25
NM_143802|Su(z)12|chr3L|-	0.6	0.35	-0.25
NM_001275368|plx|chr3R|+	0.68	0.43	-0.25
NM_165535|didum|chr2R|+	0.64	0.39	-0.25
NM_057222|Gs1|chr2L|+	0.56	0.32	-0.24
NM_164782|Bsg|chr2L|+	0.59	0.35	-0.24
NM_130731|Vap-33-1|chrX|+	0.44	0.2	-0.24
NM_079875|mod|chr3R|+	0.85	0.61	-0.24
NM_079959|bgm|chr2L|+	0.75	0.51	-0.24
NM_001169367|galectin|chr2L|+	1	0.76	-0.24
NM_137994|CG5554|chr2R|+	0.62	0.38	-0.24
NM_141490|CG2943|chr3R|-	1	0.76	-0.24
NM_167466|Chc|chrX|-	0.5	0.26	-0.24
NM_001104130|stv|chr3L|+	1	0.76	-0.24
NM_169262|D1|chr3R|-	0.77	0.53	-0.24
NM_137302|Picot|chr2R|-	0.64	0.4	-0.24
NM_136000|CG6453|chr2L|-	0.6	0.36	-0.24
NM_141648|CG8199|chr3R|+	0.96	0.72	-0.24
NM_001274000|Nmda1|chr2R|-	0.51	0.27	-0.24
NM_132147|Inx2|chrX|+	0.7	0.46	-0.24
NM_169510|Dic1|chr3R|+	0.49	0.25	-0.24
NM_168064|ens|chr3L|-	1	0.76	-0.24
NM_001273403|CG5045|chr2L|+	0.45	0.21	-0.24
NM_135492|CG4747|chr2L|+	0.91	0.67	-0.24
NM_135675|CycY|chr2L|-	1	0.76	-0.24
NM_170359|CG5508|chr3R|+	0.7	0.46	-0.24
NM_165689|CG1902|chr2R|+	0.7	0.46	-0.24
NM_001043226|ps|chr3R|+	0.89	0.65	-0.24
NM_001259424|Mlf|chr2R|-	0.95	0.71	-0.24
NM_205979|MRP|chr2L|+	0.67	0.43	-0.24
NM_135747|MRP|chr2L|+	0.67	0.43	-0.24
NM_001274510|shep|chr3L|-	0.49	0.25	-0.24
NM_169330|tws|chr3R|-	0.84	0.6	-0.24
NM_001104371|CG4562|chr3R|-	0.86	0.62	-0.24
NM_141152|ArfGAP3|chr3L|-	0.62	0.38	-0.24
NM_166986|Rala|chrX|-	0.41	0.17	-0.24
NM_079079|Acox57D-d|chr2R|+	0.77	0.53	-0.24
NM_143150|Npl4|chr3R|-	0.77	0.53	-0.24
NM_135266|CG5149|chr2L|-	0.33	0.09	-0.24
NM_001202005|CG10249|chr2R|-	0.86	0.62	-0.24
NM_001274635|Atg18|chr3L|+	0.74	0.5	-0.24
NM_136250|Nbr|chr2L|-	1	0.76	-0.24
NM_165653|Hydr1|chr2R|+	1	0.76	-0.24
NM_136545|Cyp6a14|chr2R|-	0.66	0.42	-0.24
NM_140714|Mip|chr3L|-	1	0.76	-0.24
NM_164818|emb|chr2L|+	0.79	0.55	-0.24
NM_134278|sgg|chrX|+	0.77	0.53	-0.24
NM_167491|eas|chrX|+	0.48	0.24	-0.24
NM_001169178|sgg|chrX|+	0.75	0.51	-0.24
NM_001275780|CG44009|chr3R|+	0.83	0.59	-0.24
NM_169701|Mhcl|chr3R|-	0.32	0.08	-0.24
NM_001273488|Oatp33Ea|chr2L|-	0.63	0.39	-0.24
NM_001260030|lap|chr3R|+	0.47	0.23	-0.24
NM_142784|mats|chr3R|+	0.82	0.58	-0.24
NM_136429|Eaf|chr2R|-	0.32	0.08	-0.24
NM_001260272|CG4433|chr3R|-	0.83	0.59	-0.24
NM_001170215|AP-50|chr3R|+	0.37	0.13	-0.24
NM_206519|CG4433|chr3R|-	0.82	0.58	-0.24
NM_142600|CG4433|chr3R|-	0.82	0.58	-0.24
NM_140182|CG7638|chr3L|+	0.4	0.16	-0.24
NM_001274282|klar|chr3L|-	0.81	0.57	-0.24
NM_001104035|CG11357|chr3L|+	0.4	0.16	-0.24
NM_139552|CG14969|chr3L|-	0.39	0.15	-0.24
NM_136580|CG8243|chr2R|+	0.69	0.45	-0.24
NM_001274594|CG7546|chr3L|+	0.74	0.5	-0.24
NM_134725|CG4552|chr2L|+	0.92	0.68	-0.24
NM_001273657|swm|chr2L|+	0.6	0.36	-0.24
NM_169098|sec8|chr3R|-	0.62	0.38	-0.24
NM_001273034|aph-1|chr2L|+	0.55	0.31	-0.24
NM_143460|CG7601|chr3R|-	0.52	0.28	-0.24
NM_135398|CG17834|chr2L|+	0.9	0.66	-0.24
NM_135802|loqs|chr2L|+	0.45	0.21	-0.24
NM_078836|Vha68-1|chr2L|-	0.43	0.19	-0.24
NM_167844|CG32479|chr3L|+	0.74	0.5	-0.24
NM_001274061|CG11807|chr2R|+	0.37	0.13	-0.24
NM_079649|mor|chr3R|-	0.74	0.5	-0.24
NM_001274539|CG10289|chr3L|-	0.5	0.26	-0.24
NM_167358|IP3K2|chrX|+	0.51	0.27	-0.24
NM_142710|CG16791|chr3R|-	0.72	0.48	-0.24
NM_130479|CG13377|chrX|-	0.63	0.39	-0.24
NM_058084|Taz|chr2R|-	0.39	0.15	-0.24
NM_001170225|cenB1A|chr3R|+	0.74	0.5	-0.24
NM_165652|Su(var)2-10|chr2R|+	0.5	0.26	-0.24
NM_001170148|Tm1|chr3R|+	0.79	0.56	-0.23
NM_001275580|Men|chr3R|-	0.97	0.74	-0.23
NM_079276|Hsp27|chr3L|+	1	0.77	-0.23
NM_079043|GstS1|chr2R|-	0.58	0.35	-0.23
NM_137294|CG8317|chr2R|-	0.78	0.55	-0.23
NM_079017|Hsc70-5|chr2R|-	0.97	0.74	-0.23
NM_134578|Ntf-2|chrX|+	0.55	0.32	-0.23
NM_168848|eRF1|chr3L|+	0.49	0.26	-0.23
NM_142743|CG6439|chr3R|-	0.59	0.36	-0.23
NM_058022|NTPase|chr2L|-	0.49	0.26	-0.23
NM_164515|NTPase|chr2L|-	0.49	0.26	-0.23
NM_057288|mago|chr2R|+	0.36	0.13	-0.23
NM_001273559|PRL-1|chr2L|-	0.52	0.29	-0.23
NM_140331|nst|chr3L|-	0.33	0.1	-0.23
NM_001275586|Paip2|chr3R|+	0.66	0.43	-0.23
NM_167050|MAPk-Ak2|chrX|-	0.55	0.32	-0.23
NM_136231|Mtp|chr2L|-	0.52	0.29	-0.23
NM_136389|Eb1|chr2R|+	0.64	0.41	-0.23
NM_169435|glo|chr3R|-	0.93	0.7	-0.23
NM_135509|CG5734|chr2L|-	1	0.77	-0.23
NM_134618|CG14619|chrX|+	1	0.77	-0.23
NM_170358|CG5508|chr3R|+	0.55	0.32	-0.23
NM_001169361|CaMKII|chr4|-	0.26	0.03	-0.23
NM_167117|Sxl|chrX|-	0.33	0.1	-0.23
NM_001274667|SrpRbeta|chr3L|-	0.54	0.31	-0.23
NM_165581|ACC|chr2R|-	0.68	0.45	-0.23
NM_079610|Paip2|chr3R|+	0.53	0.3	-0.23
NM_001201867|loqs|chr2L|+	1	0.77	-0.23
NM_001042938|CG40439|chr2L|-	0.61	0.38	-0.23
NM_001103385|RhoGAP1A|chrX|+	0.96	0.73	-0.23
NM_141512|Gie|chr3R|+	0.36	0.13	-0.23
NM_079146|mRpL17|chr3L|+	0.66	0.43	-0.23
NM_137502|CG5323|chr2R|+	0.53	0.3	-0.23
NM_170462|CG7943|chr3R|+	0.99	0.76	-0.23
NM_135345|CG8475|chr2L|-	0.33	0.1	-0.23
NM_142874|Ir|chr3R|+	0.83	0.6	-0.23
NM_058129|Sps2|chr2L|+	0.45	0.22	-0.23
NM_001274691|Slc45-1|chr3L|-	0.77	0.54	-0.23
NM_001014476|nrv2|chr2L|-	0.61	0.38	-0.23
NM_001274840|tral|chr3L|+	0.65	0.42	-0.23
NM_001275985|CG5746|chr3R|-	0.27	0.04	-0.23
NM_166786|myo|chr4|-	0.35	0.12	-0.23
NM_001274557|CG10103|chr3L|-	0.44	0.21	-0.23
NM_079533|alpha-Est10|chr3R|-	0.65	0.42	-0.23
NM_132656|CG1673|chrX|+	0.52	0.29	-0.23
NM_001276200|cindr|chr3R|+	0.4	0.17	-0.23
NM_001042963|CG17683|chr2R|+	0.7	0.47	-0.23
NM_140169|CG6321|chr3L|-	0.95	0.72	-0.23
NM_079495|alpha-Cat|chr3L|-	0.46	0.23	-0.23
NM_001202155|CG42671|chr3L|+	0.38	0.15	-0.23
NM_132047|CG16721|chrX|+	0.75	0.52	-0.23
NM_001273711|dia|chr2L|+	0.35	0.12	-0.23
NM_001169633|CG1513|chr2R|-	0.49	0.26	-0.23
NM_133149|CG8051|chrX|-	0.55	0.32	-0.23
NM_141772|CG6574|chr3R|-	0.76	0.53	-0.23
NM_001104411|CG7029|chr3R|+	0.57	0.34	-0.23
NM_001274593|CG7546|chr3L|+	0.73	0.5	-0.23
NM_001042998|CG17528|chr2R|-	0.63	0.4	-0.23
NM_135114|CG9171|chr2L|-	0.85	0.62	-0.23
NM_001275688|Sap47|chr3R|+	0.77	0.54	-0.23
NM_132897|CG4301|chrX|+	0.77	0.54	-0.23
NM_132889|CG9917|chrX|-	0.82	0.59	-0.23
NM_001272676|CG9917|chrX|-	0.75	0.52	-0.23
NM_001169872|CG14995|chr3L|-	0.85	0.62	-0.23
NM_169707|Akt1|chr3R|+	0.63	0.4	-0.23
NM_001259687|Cip4|chr3L|-	0.8	0.57	-0.23
NM_168687|CG9674|chr3L|-	0.54	0.31	-0.23
NM_001144640|CG42235|chr3R|+	0.42	0.19	-0.23
NM_141671|CG18542|chr3R|+	0.8	0.57	-0.23
NM_136132|swm|chr2L|+	0.63	0.4	-0.23
NM_001275214|pzg|chr3L|+	0.72	0.49	-0.23
NM_206568|nct|chr3R|+	0.55	0.32	-0.23
NM_001274947|CG7841|chr3L|-	0.41	0.18	-0.23
NM_167268|Klp10A|chrX|-	0.49	0.26	-0.23
NM_001144403|MEP-1|chr3L|+	0.76	0.53	-0.23
NM_001260286|Calx|chr3R|+	0.43	0.2	-0.23
NM_001260262|cdi|chr3R|-	0.37	0.14	-0.23
NM_168903|Aef1|chr3L|+	0.47	0.24	-0.23
NM_001259186|CG14401|chr2L|+	0.37	0.14	-0.23
NM_079058|slim|chr2R|+	0.68	0.45	-0.23
NM_078960|G-oalpha47A|chr2R|+	0.7	0.47	-0.23
NM_135964|CG17912|chr2L|+	0.76	0.53	-0.23
NM_170259|CG31324|chr3R|+	0.53	0.3	-0.23
NM_078742|Ptpa|chr2L|+	0.79	0.56	-0.23
NM_169802|l(3)05822|chr3R|-	0.68	0.45	-0.23
NM_140814|CG3893|chr3L|-	0.52	0.29	-0.23
NM_137851|CG2852|chr2R|-	0.96	0.74	-0.22
NM_001258976|chic|chr2L|-	0.6	0.38	-0.22
NM_080364|bun|chr2L|-	1	0.78	-0.22
NM_001273642|CG17549|chr2L|-	0.94	0.72	-0.22
NM_165013|bun|chr2L|-	1	0.78	-0.22
NM_057259|l(2)37Cc|chr2L|-	0.84	0.62	-0.22
NM_079892|Arf102F|chr4|+	0.24	0.02	-0.22
NM_167063|schlank|chrX|-	0.29	0.07	-0.22
NM_001103606|CG34176|chr2L|+	0.79	0.57	-0.22
NM_132393|l(1)G0289|chrX|-	0.97	0.75	-0.22
NM_132628|CG15717|chrX|+	0.8	0.58	-0.22
NM_164934|Fatp|chr2L|-	0.37	0.15	-0.22
NM_078860|Tpr2|chr2L|+	0.66	0.44	-0.22
NM_136665|GstT1|chr2R|+	0.42	0.2	-0.22
NM_142196|CG5044|chr3R|+	0.58	0.36	-0.22
NM_001258479|CG2219|chr4|-	0.99	0.77	-0.22
NM_001201738|CG6762|chrX|+	0.75	0.53	-0.22
NM_001273252|Ndae1|chr2L|-	0.34	0.12	-0.22
NM_001144534|mtd|chr3R|-	0.43	0.21	-0.22
NM_136624|CG8026|chr2R|-	0.46	0.24	-0.22
NM_169492|CtBP|chr3R|+	0.47	0.25	-0.22
NM_167941|CG1275|chr3L|-	0.62	0.4	-0.22
NM_170087|CG10365|chr3R|+	0.79	0.57	-0.22
NM_001260100|fau|chr3R|-	0.33	0.11	-0.22
NM_206640|Tom40|chrX|+	0.7	0.48	-0.22
NM_169012|CG9775|chr3R|-	0.55	0.33	-0.22
NM_057617|Sdc|chr2R|-	0.44	0.22	-0.22
NM_001169657|nemy|chr2R|-	0.74	0.52	-0.22
NM_001272422|CG11284|chrX|+	0.52	0.3	-0.22
NM_001014682|Doa|chr3R|+	1	0.78	-0.22
NM_135752|CG12404|chr2L|-	0.6	0.38	-0.22
NM_139370|CG12004|chr3L|+	0.59	0.37	-0.22
NM_164866|Pka-C1|chr2L|-	0.6	0.38	-0.22
NM_164773|LanB1|chr2L|+	0.59	0.37	-0.22
NM_139910|CG8209|chr3L|+	0.73	0.51	-0.22
NM_001276067|Lerp|chr3R|-	0.78	0.56	-0.22
NM_140736|Nedd4|chr3L|+	0.32	0.1	-0.22
NM_079550|RpA-70|chr3R|-	0.49	0.27	-0.22
NM_139598|CG14989|chr3L|+	0.53	0.31	-0.22
NM_142313|CG10326|chr3R|+	0.77	0.55	-0.22
NM_001169710|CG6424|chr2R|-	0.36	0.14	-0.22
NM_138235|CG13912|chr3L|+	0.91	0.69	-0.22
NM_001260397|woc|chr3R|-	1	0.78	-0.22
NM_001260462|CG2118|chr3R|-	0.39	0.17	-0.22
NM_079443|Kap-alpha1|chr3L|+	0.53	0.31	-0.22
NM_001274914|shd|chr3L|+	0.42	0.2	-0.22
NM_140177|CG6272|chr3L|-	0.66	0.44	-0.22
NM_057691|Dp|chr2R|+	0.67	0.45	-0.22
NM_001273461|crol|chr2L|-	0.31	0.09	-0.22
NM_135753|CG9934|chr2L|-	0.51	0.29	-0.22
NM_138759|bur|chr2L|-	0.55	0.33	-0.22
NM_140584|l(3)72Dh|chr3L|-	0.69	0.47	-0.22
NM_135558|CG5343|chr2L|-	0.74	0.52	-0.22
NM_136628|Cyp4p2|chr2R|+	0.62	0.4	-0.22
NM_001259690|Cip4|chr3L|-	0.8	0.58	-0.22
NM_078781|Obp28a|chr2L|-	0.87	0.65	-0.22
NM_001260461|faf|chr3R|+	0.49	0.27	-0.22
NM_001043077|aPKC|chr2R|-	0.62	0.4	-0.22
NM_001169834|E(bx)|chr3L|-	0.3	0.08	-0.22
NM_058093|CHIP|chr2L|+	0.67	0.45	-0.22
NM_206549|CG33111|chr3R|-	0.48	0.26	-0.22
NM_001103486|dlg1|chrX|+	0.36	0.14	-0.22
NM_167875|Ptp61F|chr3L|-	0.67	0.45	-0.22
NM_001273497|Vha68-1|chr2L|-	0.74	0.52	-0.22
NM_169548|flfl|chr3R|+	0.72	0.5	-0.22
NM_132701|CG11092|chrX|+	0.74	0.52	-0.22
NM_001273224|Liprin-alpha|chr2L|+	0.41	0.19	-0.22
NM_169970|CASK|chr3R|-	0.47	0.25	-0.22
NM_132329|CG16892|chrX|+	0.81	0.59	-0.22
NM_001103559|CG34330|chrX|-	1	0.79	-0.21
NM_166027|Cp1|chr2R|+	0.99	0.78	-0.21
NM_168972|Arf79F|chr3L|-	0.4	0.19	-0.21
NM_001170126|Vha55|chr3R|-	0.86	0.65	-0.21
NM_001259439|CG8317|chr2R|-	1	0.79	-0.21
NM_057828|Cyt-c-p|chr2L|+	0.77	0.56	-0.21
NM_078540|His3.3B|chrX|-	0.93	0.72	-0.21
NM_164616|Cg25C|chr2L|+	0.41	0.2	-0.21
NM_057521|Hrb27C|chr2L|+	0.94	0.73	-0.21
NM_001272925|Pino|chr2L|-	1	0.79	-0.21
NM_001201882|CG15282|chr2L|+	0.73	0.52	-0.21
NM_001273234|nrv1|chr2L|-	0.41	0.2	-0.21
NM_079663|Prx3|chr3R|-	0.8	0.59	-0.21
NM_001043187|mRpS5|chr3L|+	0.86	0.65	-0.21
NM_176301|ergic53|chr3L|+	0.59	0.38	-0.21
NM_140638|Aats-tyr|chr3L|-	0.94	0.73	-0.21
NM_137399|P32|chr2R|-	0.43	0.22	-0.21
NM_057911|Elf|chr2L|+	0.63	0.42	-0.21
NM_079680|vib|chr3R|-	0.88	0.67	-0.21
NM_001202145|Galk|chr3L|-	0.75	0.54	-0.21
NM_057730|sw|chrX|-	0.53	0.32	-0.21
NM_001272679|CG9921|chrX|-	0.24	0.03	-0.21
NM_166039|CG8468|chr2R|+	0.85	0.64	-0.21
NM_001274823|Pbgs|chr3L|-	0.29	0.08	-0.21
NM_166625|CG4797|chr2R|-	1	0.79	-0.21
NM_137990|CG4797|chr2R|-	1	0.79	-0.21
NM_169369|SelR|chr3R|-	0.65	0.44	-0.21
NM_001201855|Myo31DF|chr2L|-	0.79	0.58	-0.21
NM_167942|CG1275|chr3L|-	0.6	0.39	-0.21
NM_170414|Trc8|chr3R|-	1	0.79	-0.21
NM_142074|Npc2b|chr3R|+	0.74	0.53	-0.21
NM_001273303|CG8360|chr2L|+	0.85	0.64	-0.21
NM_137006|Pex13|chr2R|-	0.76	0.55	-0.21
NM_135917|CG18480|chr2L|+	0.34	0.13	-0.21
NM_167624|Aats-his|chrX|+	0.66	0.45	-0.21
NM_001202357|CG11089|chr3R|+	0.3	0.09	-0.21
NM_001202355|CG31381|chr3R|+	0.3	0.09	-0.21
NM_136964|nemy|chr2R|-	0.76	0.55	-0.21
NM_132108|Ctr1A|chrX|+	0.34	0.13	-0.21
NM_168498|CG32103|chr3L|-	0.44	0.23	-0.21
NM_001014647|jar|chr3R|-	0.44	0.23	-0.21
NM_144459|CG18731|chr3R|+	0.9	0.69	-0.21
NM_170576|faf|chr3R|+	0.92	0.71	-0.21
NM_001031986|Pif1A|chr3R|-	0.25	0.04	-0.21
NM_139623|CG1309|chr3L|+	0.79	0.58	-0.21
NM_001258771|sd|chrX|+	0.39	0.18	-0.21
NM_001273804|CG3409|chr2R|-	1	0.79	-0.21
NM_143522|CG9747|chr3R|-	0.92	0.71	-0.21
NM_001274754|CG8003|chr3L|+	0.43	0.22	-0.21
NM_206269|CG12006|chr3L|+	0.91	0.7	-0.21
NM_140904|CG8004|chr3L|-	0.49	0.28	-0.21
NM_079067|cora|chr2R|+	0.54	0.33	-0.21
NM_168442|CG32073|chr3L|-	0.92	0.71	-0.21
NM_001275465|CG11975|chr3R|+	0.26	0.05	-0.21
NM_142984|CG6364|chr3R|+	0.92	0.71	-0.21
NM_143679|MED26|chr4|-	0.95	0.74	-0.21
NM_167058|CG5921|chrX|+	0.81	0.6	-0.21
NM_001275872|slmb|chr3R|-	0.7	0.49	-0.21
NM_165432|laccase2|chr2R|+	0.36	0.15	-0.21
NM_143312|wdb|chr3R|-	0.5	0.29	-0.21
NM_140243|crim|chr3L|-	0.77	0.56	-0.21
NM_001274468|CG14995|chr3L|-	0.83	0.62	-0.21
NM_058155|Gld|chr3R|-	0.86	0.65	-0.21
NM_164503|daw|chr2L|+	0.56	0.35	-0.21
NM_132177|Rab39|chrX|+	0.8	0.59	-0.21
NM_132297|CG7766|chrX|-	0.71	0.5	-0.21
NM_079574|Snap24|chr3R|-	0.6	0.39	-0.21
NM_080162|mit(1)15|chrX|+	0.95	0.74	-0.21
NM_168059|CG14995|chr3L|-	0.78	0.57	-0.21
NM_001202235|tub|chr3R|+	0.83	0.62	-0.21
NM_001042986|Nipped-B|chr2R|-	0.39	0.18	-0.21
NM_140329|Pcaf|chr3L|-	0.79	0.58	-0.21
NM_001276000|Ude|chr3R|-	0.58	0.37	-0.21
NM_164779|Cka|chr2L|+	0.58	0.37	-0.21
NM_206374|CrebA|chr3L|+	0.46	0.25	-0.21
NM_143326|CG12428|chr3R|-	0.56	0.35	-0.21
NM_134543|l(1)G0004|chrX|+	0.86	0.65	-0.21
NM_140233|CG7339|chr3L|+	0.39	0.18	-0.21
NM_169692|CG32856|chr3R|-	0.8	0.59	-0.21
NM_001260380|gro|chr3R|+	0.71	0.5	-0.21
NM_135256|CG4495|chr2L|+	0.59	0.38	-0.21
NM_001104522|heph|chr3R|-	0.37	0.16	-0.21
NM_142361|lute|chr3R|+	0.58	0.37	-0.21
NM_176244|dom|chr2R|+	0.67	0.46	-0.21
NM_166642|CG3065|chr2R|+	0.91	0.7	-0.21
NM_001273590|CG31739|chr2L|+	0.48	0.27	-0.21
NM_001273379|CG31712|chr2L|-	0.55	0.34	-0.21
NM_001144539|MTA1-like|chr3R|-	0.59	0.38	-0.21
NM_142398|CG7713|chr3R|+	0.4	0.19	-0.21
NM_166643|CG3065|chr2R|+	0.84	0.63	-0.21
NM_136228|CG14401|chr2L|+	0.34	0.13	-0.21
NM_165916|Sin3A|chr2R|-	0.7	0.49	-0.21
NM_165744|14-3-3zeta|chr2R|+	0.5	0.3	-0.2
NM_165665|VhaAC45|chr2R|+	0.96	0.76	-0.2
NM_079044|Amy-d|chr2R|+	0.53	0.33	-0.2
NM_078863|Mhc|chr2L|+	1	0.8	-0.2
NM_001274469|Chd64|chr3L|-	0.58	0.38	-0.2
NM_001169559|Acon|chr2L|+	0.36	0.16	-0.2
NM_141619|VhaM8.9|chr3R|+	0.44	0.24	-0.2
NM_138139|Tina-1|chr2R|-	0.59	0.39	-0.2
NM_167001|cib|chrX|+	0.45	0.25	-0.2
NM_142863|CG6726|chr3R|+	0.46	0.26	-0.2
NM_167002|cib|chrX|+	0.45	0.25	-0.2
NM_169295|Kap-alpha3|chr3R|-	0.96	0.76	-0.2
NM_165756|Syb|chr2R|-	0.49	0.29	-0.2
NM_080168|rin|chr3R|+	1	0.8	-0.2
NM_132765|CG5548|chrX|+	0.74	0.54	-0.2
NM_079025|Cyp6a8|chr2R|-	0.64	0.44	-0.2
NM_001273572|Tpr2|chr2L|+	0.31	0.11	-0.2
NM_001202085|CG42846|chr3L|-	0.79	0.59	-0.2
NM_135161|CG9486|chr2L|+	1	0.8	-0.2
NM_206494|Tm1|chr3R|+	0.47	0.27	-0.2
NM_001273573|Tpr2|chr2L|+	0.44	0.24	-0.2
NM_058057|Inos|chr2R|-	0.5	0.3	-0.2
NR_047771|CR43264|chrX|-	1	0.8	-0.2
NM_001273918|Pfk|chr2R|+	0.89	0.69	-0.2
NM_139579|Sc2|chr3L|+	0.74	0.54	-0.2
NM_132892|CG9921|chrX|-	0.24	0.04	-0.2
NM_143258|CG6330|chr3R|-	0.24	0.04	-0.2
NM_167458|CG9281|chrX|-	0.38	0.18	-0.2
NM_166288|CG5174|chr2R|+	0.45	0.25	-0.2
NM_141284|mRpL44|chr3R|-	1	0.8	-0.2
NM_169368|SelR|chr3R|-	0.61	0.41	-0.2
NM_130718|HIP|chrX|+	0.62	0.42	-0.2
NM_001259116|LSm7|chr2L|-	0.87	0.67	-0.2
NM_142323|CG3678|chr3R|-	0.76	0.56	-0.2
NM_169769|alt|chr3R|-	0.79	0.59	-0.2
NM_170419|alph|chr3R|+	0.7	0.5	-0.2
NM_001038719|Mitf|chr4|+	0.25	0.05	-0.2
NM_169103|jagn|chr3R|+	0.76	0.56	-0.2
NM_132192|CG1444|chrX|+	0.65	0.45	-0.2
NM_135534|CG4972|chr2L|+	0.45	0.25	-0.2
NM_001104277|cu|chr3R|+	0.49	0.29	-0.2
NM_001201735|Ucp4A|chrX|+	0.91	0.71	-0.2
NM_080496|mtSSB|chr3R|-	0.82	0.62	-0.2
NM_001259672|eIF5B|chr3L|-	0.57	0.37	-0.2
NM_143717|eIF5B|chr3L|-	0.58	0.38	-0.2
NM_001274554|CG10103|chr3L|-	0.41	0.21	-0.2
NM_141241|CG1129|chr3R|+	0.67	0.47	-0.2
NM_079489|Csp|chr3L|+	0.78	0.58	-0.2
NM_001042858|CG13865|chrX|+	0.74	0.54	-0.2
NM_165419|gus|chr2R|-	0.26	0.06	-0.2
NM_001170006|Su(Tpl)|chr3L|-	0.36	0.16	-0.2
NM_167448|CG6340|chrX|+	0.27	0.07	-0.2
NM_001273479|atilla|chr2L|-	0.81	0.61	-0.2
NM_169407|Jupiter|chr3R|-	0.73	0.53	-0.2
NM_001169320|Rip11|chrX|-	0.58	0.38	-0.2
NM_001260075|rump|chr3R|-	0.42	0.22	-0.2
NM_001275232|CG7519|chr3L|+	0.88	0.68	-0.2
NM_167034|spoon|chrX|-	0.46	0.26	-0.2
NM_170344|Mtl|chr3R|+	1	0.8	-0.2
NM_001274402|msn|chr3L|-	0.4	0.2	-0.2
NM_142525|Cyp12a5|chr3R|+	0.62	0.42	-0.2
NM_001274821|thoc6|chr3L|-	1	0.8	-0.2
NM_142825|Cyp6d4|chr3R|+	0.33	0.13	-0.2
NM_176322|Est-6|chr3L|+	0.34	0.14	-0.2
NM_165939|CG42708|chr2R|-	0.74	0.54	-0.2
NM_168159|Cpr65Aw|chr3L|-	0.65	0.45	-0.2
NM_001274769|CG6272|chr3L|-	0.6	0.4	-0.2
NM_139413|CG12024|chr3L|+	0.96	0.76	-0.2
NM_080087|Aats-trp|chr3R|-	0.55	0.35	-0.2
NM_001273746|nrv3|chr2L|+	0.37	0.17	-0.2
NM_165664|CG8026|chr2R|-	0.74	0.54	-0.2
NM_142939|CG5854|chr3R|+	0.61	0.41	-0.2
NM_141048|CG7324|chr3L|-	0.85	0.65	-0.2
NM_079086|qkr58E-2|chr2R|+	0.52	0.32	-0.2
NM_144477|He|chr2L|-	0.49	0.29	-0.2
NM_001144577|tal-AA|chr3R|+	0.38	0.18	-0.2
NM_001275266|Nopp140|chr3L|+	0.84	0.64	-0.2
NM_001014513|stmA|chr2R|-	0.52	0.32	-0.2
NM_165040|CG31855|chr2L|+	0.48	0.28	-0.2
NM_142434|CG7988|chr3R|+	0.92	0.72	-0.2
NM_001273633|l(2)37Cg|chr2L|-	0.81	0.61	-0.2
NM_166542|CG30273|chr2R|+	0.89	0.69	-0.2
NM_168415|CG8009|chr3L|+	0.49	0.29	-0.2
NM_001272291|tlk|chrX|+	0.3	0.1	-0.2
NM_001042800|CG32699|chrX|-	0.7	0.5	-0.2
NM_132521|CG1578|chrX|-	0.57	0.37	-0.2
NM_141584|CG8379|chr3R|+	0.51	0.31	-0.2
NM_134624|CG17598|chrX|-	0.7	0.5	-0.2
NM_164376|kis|chr2L|-	0.8	0.6	-0.2
NM_001104284|CG12213|chr3R|-	0.76	0.56	-0.2
NM_080350|Paf-AHalpha|chrX|-	0.4	0.2	-0.2
NM_001260178|jvl|chr3R|+	0.31	0.11	-0.2
NM_169461|MBD-R2|chr3R|-	0.41	0.21	-0.2
NM_141047|CG7338|chr3L|+	0.52	0.32	-0.2
NM_078643|nonA|chrX|+	0.37	0.17	-0.2
NM_132420|CG32676|chrX|-	0.81	0.61	-0.2
NM_001032099|Adh|chr2L|+	0.71	0.52	-0.19
NM_001260455|CG1746|chr3R|-	0.47	0.28	-0.19
NM_135695|CG6770|chr2L|-	0.53	0.34	-0.19
NM_001272390|CG2233|chrX|-	0.5	0.31	-0.19
NM_143778|l(2)06225|chr2L|-	0.82	0.63	-0.19
NM_133136|Mur18B|chrX|+	0.98	0.79	-0.19
NM_001273117|Clect27|chr2L|-	0.66	0.47	-0.19
NM_141668|CG16817|chr3R|+	0.75	0.56	-0.19
NM_134862|CG9894|chr2L|+	0.29	0.1	-0.19
NM_001169494|bun|chr2L|-	1	0.81	-0.19
NM_078939|Pgi|chr2R|-	0.57	0.38	-0.19
NM_058042|skpA|chrX|+	0.52	0.33	-0.19
NM_001170211|CG6439|chr3R|-	0.95	0.76	-0.19
NM_001275790|Xrp1|chr3R|+	0.48	0.29	-0.19
NM_170206|vig2|chr3R|+	0.68	0.49	-0.19
NM_001103813|CG34232|chr2R|-	0.95	0.76	-0.19
NM_137907|l(2)k09913|chr2R|+	0.86	0.67	-0.19
NM_001275172|Clc|chr3L|+	0.51	0.32	-0.19
NM_001273881|Acsl|chr2R|+	0.76	0.57	-0.19
NM_135866|l(2)34Fc|chr2L|-	0.76	0.57	-0.19
NM_141039|CG12974|chr3L|-	0.86	0.67	-0.19
NM_079537|alpha-Est7|chr3R|-	0.57	0.38	-0.19
NR_048398|CR43471|chr3R|-	0.99	0.8	-0.19
NM_001275640|CG8066|chr3R|-	0.31	0.12	-0.19
NM_140194|Plod|chr3L|-	0.8	0.61	-0.19
NM_001259849|CG15715|chr3L|-	0.45	0.26	-0.19
NM_079277|aay|chr3L|+	0.78	0.59	-0.19
NM_079607|Arp1|chr3R|+	0.35	0.16	-0.19
NM_164511|CG31694|chr2L|-	0.5	0.31	-0.19
NM_001272343|PpV|chrX|-	1	0.81	-0.19
NM_141328|jagn|chr3R|+	0.85	0.66	-0.19
NM_141863|glo|chr3R|-	0.91	0.72	-0.19
NM_001259447|CG5550|chr2R|+	0.41	0.22	-0.19
NM_001202238|tacc|chr3R|-	0.26	0.07	-0.19
NM_001170001|CG42638|chr3L|-	0.85	0.66	-0.19
NM_001272692|Arp2|chrX|-	0.51	0.32	-0.19
NM_001273251|Ndae1|chr2L|-	0.48	0.29	-0.19
NM_164983|Qtzl|chr2L|+	0.49	0.3	-0.19
NM_137450|CG17680|chr2R|-	0.78	0.59	-0.19
NM_135029|CG3036|chr2L|+	0.6	0.41	-0.19
NM_141693|CG8507|chr3R|+	0.35	0.16	-0.19
NM_001275448|CG11753|chr3R|+	0.91	0.72	-0.19
NM_143325|ALiX|chr3R|-	0.54	0.35	-0.19
NM_001272219|mRpL16|chrX|+	0.36	0.17	-0.19
NM_001274793|CG11652|chr3L|-	0.65	0.46	-0.19
NM_135969|mdy|chr2L|+	0.67	0.48	-0.19
NM_001104194|ArfGAP3|chr3L|-	0.64	0.45	-0.19
NM_001275976|jar|chr3R|-	0.43	0.24	-0.19
NM_001104476|woc|chr3R|-	1	0.81	-0.19
NM_142191|CG6218|chr3R|-	0.38	0.19	-0.19
NM_140520|CG7427|chr3L|+	0.35	0.16	-0.19
NM_167118|Sxl|chrX|-	0.4	0.21	-0.19
NM_078710|Hlc|chrX|-	0.46	0.27	-0.19
NM_141942|CG5844|chr3R|+	0.55	0.36	-0.19
NM_141268|Hph|chr3R|+	0.49	0.3	-0.19
NM_136550|CG8736|chr2R|-	1	0.81	-0.19
NM_142929|CG10208|chr3R|-	0.92	0.73	-0.19
NM_165111|Cul-3|chr2L|-	0.39	0.2	-0.19
NM_001169605|CG1399|chr2R|-	0.26	0.07	-0.19
NM_141055|rgn|chr3L|+	0.8	0.61	-0.19
NM_135365|CG7787|chr2L|+	0.58	0.39	-0.19
NM_001201982|CG8520|chr2R|+	0.49	0.3	-0.19
NM_130598|CG14805|chrX|+	0.87	0.68	-0.19
NM_169688|Sap47|chr3R|+	0.36	0.17	-0.19
NM_141437|CG10098|chr3R|+	0.88	0.69	-0.19
NM_141439|CG31248|chr3R|+	0.72	0.53	-0.19
NM_001202093|CG12024|chr3L|+	0.92	0.73	-0.19
NM_139969|Unr|chr3L|-	0.86	0.67	-0.19
NM_001273404|Cand1|chr2L|-	0.32	0.13	-0.19
NM_133134|Ulp1|chrX|-	0.97	0.78	-0.19
NM_142705|CG5919|chr3R|+	0.51	0.32	-0.19
NM_143295|CG5934|chr3R|+	0.48	0.29	-0.19
NM_165625|stmA|chr2R|-	0.53	0.34	-0.19
NM_001144476|CG32138|chr3L|+	0.3	0.11	-0.19
NM_135783|CG16820|chr2L|+	0.51	0.32	-0.19
NM_168616|CG32147|chr3L|-	0.54	0.35	-0.19
NM_001275012|roq|chr3L|-	0.61	0.42	-0.19
NM_080130|LysC|chr3L|+	1	0.82	-0.18
NM_142490|CG7714|chr3R|-	1	0.82	-0.18
NM_057925|Lcp65Ag1|chr3L|-	0.43	0.25	-0.18
NM_167394|CG32603|chrX|+	1	0.82	-0.18
NM_132689|CG11151|chrX|+	0.5	0.32	-0.18
NM_057560|Vha55|chr3R|-	0.42	0.24	-0.18
NM_138084|CG13585|chr2R|+	1	0.82	-0.18
NM_139535|CG17737|chr3L|+	0.61	0.43	-0.18
NM_001170154|glob1|chr3R|-	0.58	0.4	-0.18
NM_079645|glob1|chr3R|-	0.58	0.4	-0.18
NM_167369|CG1640|chrX|+	0.3	0.12	-0.18
NM_167365|CG1640|chrX|+	0.3	0.12	-0.18
NM_001259212|CG17508|chr2R|+	0.22	0.04	-0.18
NM_135423|CG9568|chr2L|+	0.47	0.29	-0.18
NM_144369|Ugt86Da|chr3R|+	1	0.82	-0.18
NM_001258988|Hrb27C|chr2L|+	0.26	0.08	-0.18
NM_166583|l(2)k09913|chr2R|+	0.86	0.68	-0.18
NM_057810|Cpr|chr2L|+	0.74	0.56	-0.18
NM_168334|eIF-4E|chr3L|-	0.66	0.48	-0.18
NM_140420|CG9040|chr3L|+	0.85	0.67	-0.18
NM_167997|CG32284|chr3L|+	0.91	0.73	-0.18
NM_079636|Tm1|chr3R|+	0.53	0.35	-0.18
NM_132700|Clic|chrX|-	0.39	0.21	-0.18
NM_206796|Sdic4|chrX|-	0.48	0.3	-0.18
NM_057731|sw|chrX|-	0.55	0.37	-0.18
NM_080101|Aats-ile|chr3L|+	0.96	0.78	-0.18
NM_080381|Nop60B|chr2R|+	0.69	0.51	-0.18
NM_001258848|Sdic1|chrX|-	0.18	0	-0.18
NM_080530|l(2)37Bb|chr2L|-	1	0.82	-0.18
NM_139780|CG13298|chr3L|-	0.63	0.45	-0.18
NM_001273644|Pax|chr2L|-	0.57	0.39	-0.18
NM_134678|CG11885|chr2L|-	0.98	0.8	-0.18
NM_141522|CG11672|chr3R|-	0.81	0.63	-0.18
NM_139854|sec63|chr3L|+	0.64	0.46	-0.18
NM_130669|CG2701|chrX|-	1	0.82	-0.18
NM_001273420|TfIIB|chr2L|+	0.22	0.04	-0.18
NM_206223|CG33229|chr3L|+	0.57	0.39	-0.18
NM_057657|cpb|chr2L|+	0.59	0.41	-0.18
NM_001275028|CG32164|chr3L|+	0.81	0.63	-0.18
NM_078896|sxc|chr2R|+	0.33	0.15	-0.18
NM_057629|Pka-C1|chr2L|-	0.7	0.52	-0.18
NM_136587|CG8230|chr2R|-	0.7	0.52	-0.18
NM_165630|sec31|chr2R|+	0.65	0.47	-0.18
NM_134768|CG17660|chr2L|-	0.68	0.5	-0.18
NM_132226|GIIIspla2|chrX|+	0.68	0.5	-0.18
NM_001031891|Sxl|chrX|-	0.32	0.14	-0.18
NM_079448|Rab8|chr3L|-	0.48	0.3	-0.18
NM_140499|Prp31|chr3L|+	0.95	0.77	-0.18
NM_078947|Pka-R2|chr2R|-	0.55	0.37	-0.18
NM_164768|CG31904|chr2L|-	0.91	0.73	-0.18
NM_001201743|Tao|chrX|-	0.39	0.21	-0.18
NM_001043152|Papss|chr3L|+	0.67	0.49	-0.18
NM_001275541|Ugt86Dh|chr3R|+	0.95	0.77	-0.18
NM_001258704|CG10353|chrX|-	0.97	0.79	-0.18
NM_001103774|Not1|chr2R|-	0.67	0.49	-0.18
NM_079809|Mtl|chr3R|+	1	0.82	-0.18
NM_142231|CG9590|chr3R|+	0.7	0.52	-0.18
NM_001273772|CG17883|chr2R|+	0.72	0.54	-0.18
NM_001103831|CG42319|chr2R|+	0.42	0.24	-0.18
NM_001201945|Lpin|chr2R|-	0.74	0.56	-0.18
NM_170231|Npl4|chr3R|-	0.63	0.45	-0.18
NM_001104173|fz2|chr3L|-	0.87	0.69	-0.18
NM_137823|babos|chr2R|-	0.7	0.52	-0.18
NM_057915|Abi|chr3R|-	0.87	0.69	-0.18
NM_057471|alpha-Adaptin|chr2L|-	0.4	0.22	-0.18
NM_167921|CG12024|chr3L|+	0.91	0.73	-0.18
NM_136425|CG11107|chr2R|+	0.61	0.43	-0.18
NM_168279|CG43078|chr3L|+	0.37	0.19	-0.18
NM_143201|CG14543|chr3R|+	0.89	0.71	-0.18
NM_132842|Graf|chrX|-	0.31	0.13	-0.18
NM_167623|GalNAc-T2|chrX|-	0.9	0.72	-0.18
NM_134885|CG8814|chr2L|+	0.77	0.59	-0.18
NM_001273627|Acn|chr2L|+	0.55	0.37	-0.18
NM_169325|Fmr1|chr3R|-	0.78	0.6	-0.18
NM_132197|CG10778|chrX|-	0.72	0.54	-0.18
NM_135712|CG6583|chr2L|-	0.29	0.11	-0.18
NM_001104094|I-2|chr3L|-	0.63	0.45	-0.18
NM_001274706|CG3408|chr3L|-	0.82	0.64	-0.18
NM_137790|CG11474|chr2R|-	0.61	0.43	-0.18
NM_079572|hyd|chr3R|-	0.44	0.26	-0.18
NM_139439|CG15820|chr3L|-	0.81	0.63	-0.18
NM_001273783|l(2)NC136|chr2R|-	0.47	0.29	-0.18
NM_080011|Cbp80|chrX|+	0.35	0.17	-0.18
NM_001274540|CG10289|chr3L|-	0.32	0.14	-0.18
NM_001274917|Trl|chr3L|-	0.49	0.31	-0.18
NM_001202209|CG42833|chr3L|+	0.77	0.59	-0.18
NR_074017|CR44133|chr3R|+	0.49	0.31	-0.18
NM_142532|CG5555|chr3R|-	0.8	0.62	-0.18
NM_133075|Ggt-1|chrX|-	0.53	0.35	-0.18
NM_058162|Jafrac1|chrX|+	1	0.83	-0.17
NM_167359|Jafrac1|chrX|+	1	0.83	-0.17
NM_001258977|chic|chr2L|-	0.36	0.19	-0.17
NM_169841|Xrp1|chr3R|+	1	0.83	-0.17
NM_057743|Act87E|chr3R|+	0.96	0.79	-0.17
NM_001273743|crc|chr2L|+	0.86	0.69	-0.17
NM_135190|Sec61alpha|chr2L|-	0.43	0.26	-0.17
NM_079379|SsRbeta|chr3L|+	0.8	0.63	-0.17
NM_079969|Acon|chr2L|+	0.39	0.22	-0.17
NM_168292|Prm|chr3L|-	0.71	0.54	-0.17
NM_079833|Nlp|chr3R|+	0.68	0.51	-0.17
NM_001032217|Df31|chr2L|-	0.26	0.09	-0.17
NM_176714|CG10962|chrX|-	0.61	0.44	-0.17
NM_001170311|CG31004|chr3R|-	1	0.83	-0.17
NM_058097|Manf|chr3R|+	0.44	0.27	-0.17
NM_144321|CG6115|chr2L|-	0.75	0.58	-0.17
NM_001275916|Gclm|chr3R|-	0.39	0.22	-0.17
NM_135652|CG6287|chr2L|-	0.58	0.41	-0.17
NM_132060|CG5941|chrX|+	0.25	0.08	-0.17
NM_001032049|l(2)s5379|chr2L|+	0.83	0.66	-0.17
NM_078766|Kr-h2|chr2L|+	0.54	0.37	-0.17
NM_136299|CG3262|chr2L|+	0.91	0.74	-0.17
NM_137316|CG5550|chr2R|+	0.35	0.18	-0.17
NM_176585|janA|chr3R|-	0.56	0.39	-0.17
NM_080266|Gclc|chrX|-	0.31	0.14	-0.17
NM_144354|SF2|chr3R|-	0.72	0.55	-0.17
NM_141330|CG2051|chr3R|-	1	0.83	-0.17
NM_141646|RnpS1|chr3R|+	1	0.83	-0.17
NM_001170313|gammaCop|chr3R|+	0.7	0.53	-0.17
NM_001272948|cpb|chr2L|+	0.73	0.56	-0.17
NM_001273362|numb|chr2L|+	0.2	0.03	-0.17
NR_073764|CR43051|chr2L|+	0.84	0.67	-0.17
NM_139954|CG7083|chr3L|+	0.96	0.79	-0.17
NM_001103531|Arp2|chrX|-	0.46	0.29	-0.17
NM_001169832|Vdup1|chr3L|-	0.26	0.09	-0.17
NM_167516|CG4239|chrX|+	0.69	0.52	-0.17
NM_135850|Cyp28a5|chr2L|+	0.53	0.36	-0.17
NM_170212|CG31098|chr3R|-	0.73	0.56	-0.17
NM_135350|CG8372|chr2L|-	0.83	0.66	-0.17
NM_166644|Phm|chr2R|-	0.64	0.47	-0.17
NM_140516|CG7945|chr3L|-	0.53	0.36	-0.17
NM_079754|jar|chr3R|-	0.4	0.23	-0.17
NM_167005|Fas2|chrX|-	0.25	0.08	-0.17
NM_136489|CG8728|chr2R|-	0.66	0.49	-0.17
NM_001273508|Ski6|chr2L|-	1	0.83	-0.17
NM_142792|AP-50|chr3R|+	0.59	0.42	-0.17
NM_001170080|Mkk4|chr3R|-	0.49	0.32	-0.17
NM_141769|CG4511|chr3R|+	0.67	0.5	-0.17
NM_001273301|CG8475|chr2L|-	0.35	0.18	-0.17
NM_165723|Pka-R2|chr2R|-	0.63	0.46	-0.17
NM_132512|FucT6|chrX|-	1	0.83	-0.17
NM_078739|Prx6005|chr2L|-	0.36	0.19	-0.17
NM_001259937|rgn|chr3L|+	0.79	0.62	-0.17
NM_137295|CG8311|chr2R|-	0.24	0.07	-0.17
NM_001169738|par-1|chr2R|+	0.58	0.41	-0.17
NM_134866|aph-1|chr2L|+	0.9	0.73	-0.17
NM_001104402|CG34376|chr3R|+	0.95	0.78	-0.17
NM_058005|Mkk4|chr3R|-	0.44	0.27	-0.17
NM_001274346|drpr|chr3L|-	0.58	0.41	-0.17
NM_058102|drpr|chr3L|-	0.57	0.4	-0.17
NM_001272451|CG12118|chrX|-	0.86	0.69	-0.17
NM_079460|Psn|chr3L|+	0.57	0.4	-0.17
NM_165378|nrv3|chr2L|+	0.85	0.68	-0.17
NM_001014528|CG33506|chr2R|-	0.8	0.63	-0.17
NM_166149|CG30094|chr2R|+	0.97	0.8	-0.17
NM_001169496|CG9934|chr2L|-	0.57	0.4	-0.17
NM_165589|Pabp2|chr2R|+	0.18	0.01	-0.17
NM_080249|krz|chr3R|-	0.26	0.09	-0.17
NM_140452|shd|chr3L|+	0.59	0.42	-0.17
NM_168278|CG43078|chr3L|+	0.37	0.2	-0.17
NM_139608|Ero1L|chr3L|+	0.61	0.44	-0.17
NM_165889|CG30043|chr2R|+	0.83	0.66	-0.17
NM_141853|CG14721|chr3R|+	0.74	0.57	-0.17
NM_167270|Klp10A|chrX|-	0.82	0.65	-0.17
NM_001259276|Cirl|chr2R|+	0.33	0.16	-0.17
NM_001258694|dlg1|chrX|+	0.67	0.5	-0.17
NM_079076|Act57B|chr2R|+	1	0.84	-0.16
NM_057868|Nacalpha|chr2R|-	1	0.84	-0.16
NM_078642|Cyp1|chrX|-	0.31	0.15	-0.16
NM_165474|Vha16-1|chr2R|-	0.45	0.29	-0.16
NM_001275656|Mf|chr3R|-	0.24	0.08	-0.16
NM_137700|CG10527|chr2R|-	0.94	0.78	-0.16
NM_001275650|eff|chr3R|-	0.28	0.12	-0.16
NM_166217|GstS1|chr2R|-	0.92	0.76	-0.16
NM_001273581|VhaSFD|chr2L|-	0.27	0.11	-0.16
NM_134670|CG3625|chr2L|-	0.25	0.09	-0.16
NM_001258893|CG3625|chr2L|-	0.25	0.09	-0.16
NM_057307|ng1|chrX|+	0.57	0.41	-0.16
NM_001202063|CG3800|chr2R|-	0.59	0.43	-0.16
NM_136832|CG12384|chr2R|-	0.39	0.23	-0.16
NM_001032249|Zasp52|chr2R|-	1	0.84	-0.16
NR_073641|CR43836|chrX|-	0.62	0.46	-0.16
NM_057908|Idgf3|chr2L|+	0.87	0.71	-0.16
NM_166239|eIF3-S9|chr2R|+	0.58	0.42	-0.16
NM_001015401|Tim17b|chr3RHet|-	0.34	0.18	-0.16
NM_169253|CG11984|chr3R|-	1	0.84	-0.16
NM_001103812|CG34232|chr2R|-	0.71	0.55	-0.16
NM_167694|Peritrophin-A|chrX|+	0.99	0.83	-0.16
NM_001031865|trol|chrX|-	0.38	0.22	-0.16
NM_139478|CG1143|chr3L|+	0.84	0.68	-0.16
NM_001031867|trol|chrX|-	1	0.84	-0.16
NM_001275478|CG43674|chr3R|+	0.39	0.23	-0.16
NM_136880|CG8888|chr2R|-	0.9	0.74	-0.16
NM_079743|TfIIA-S|chr3R|-	0.72	0.56	-0.16
NM_079874|ferrochelatase|chr3R|-	0.95	0.79	-0.16
NM_079506|UbcD6|chr3R|-	0.41	0.25	-0.16
NM_169220|stck|chr3R|+	0.82	0.66	-0.16
NM_058006|Hop|chr2L|+	0.6	0.44	-0.16
NM_169221|stck|chr3R|+	0.83	0.67	-0.16
NM_079740|Tbp-1|chr3R|+	0.76	0.6	-0.16
NM_001272370|ogre|chrX|-	0.95	0.79	-0.16
NM_165398|CG1416|chr2L|+	0.53	0.37	-0.16
NM_001104400|CG34288|chr3R|-	0.74	0.58	-0.16
NM_169564|rdx|chr3R|-	0.25	0.09	-0.16
NM_141393|CG1041|chr3R|-	0.62	0.46	-0.16
NM_001259295|Pdk|chr2R|+	0.54	0.38	-0.16
NM_137504|CG5493|chr2R|-	0.5	0.34	-0.16
NM_167463|CG8974|chrX|-	0.52	0.36	-0.16
NM_001260414|CG5508|chr3R|+	0.44	0.28	-0.16
NM_001201991|CG42808|chr2R|-	1	0.84	-0.16
NM_164549|CG31778|chr2L|-	0.28	0.12	-0.16
NM_079439|asf1|chr3L|+	0.24	0.08	-0.16
NM_137495|GstE11|chr2R|+	0.59	0.43	-0.16
NM_001169403|CG2950|chr2L|-	0.21	0.05	-0.16
NM_132574|CG42258|chrX|+	0.24	0.08	-0.16
NM_132264|spirit|chrX|-	0.86	0.7	-0.16
NM_176698|Inx7|chrX|-	0.78	0.62	-0.16
NM_078733|Rab5|chr2L|-	0.66	0.5	-0.16
NM_001258691|CG34348|chrX|+	0.97	0.81	-0.16
NM_058040|Faf|chr2L|-	0.41	0.25	-0.16
NM_165431|laccase2|chr2R|+	0.22	0.06	-0.16
NM_136742|CG12895|chr2R|-	0.71	0.55	-0.16
NM_057540|TfIIB|chr2L|+	0.23	0.07	-0.16
NM_001169609|CSN4|chr2R|+	0.77	0.61	-0.16
NM_167243|Tango5|chrX|-	0.87	0.71	-0.16
NM_167615|CG32549|chrX|-	0.36	0.2	-0.16
NM_078562|l(1)10Bb|chrX|-	0.61	0.45	-0.16
NM_164734|CG11266|chr2L|+	0.36	0.2	-0.16
NM_001042983|CG17883|chr2R|+	0.71	0.55	-0.16
NM_001272544|CG10353|chrX|-	1	0.84	-0.16
NM_001144547|lap|chr3R|+	0.3	0.14	-0.16
NM_169500|CG8630|chr3R|+	0.63	0.47	-0.16
NM_001273802|CG9410|chr2R|+	0.9	0.74	-0.16
NM_137798|GM130|chr2R|-	0.9	0.74	-0.16
NM_135490|CG5850|chr2L|-	0.92	0.76	-0.16
NM_134509|Alr|chrX|+	1	0.84	-0.16
NM_001272802|Alr|chrX|+	1	0.84	-0.16
NM_001258770|sd|chrX|+	0.34	0.18	-0.16
NM_001272149|CG32016|chr4|-	0.28	0.12	-0.16
NM_001259904|Max|chr3L|-	0.77	0.61	-0.16
NM_176415|CG1142|chr3R|-	0.69	0.53	-0.16
NM_139908|CG8042|chr3L|-	0.73	0.57	-0.16
NM_135363|CG7806|chr2L|+	0.25	0.09	-0.16
NM_001169780|Oatp58Dc|chr2R|-	0.57	0.41	-0.16
NM_130596|Vps26|chrX|+	0.77	0.61	-0.16
NM_140143|CG8009|chr3L|+	0.41	0.25	-0.16
NM_168424|CG6404|chr3L|-	0.71	0.55	-0.16
NM_140160|CG6404|chr3L|-	0.71	0.55	-0.16
NM_001169590|EcR|chr2R|-	0.24	0.08	-0.16
NM_144201|CG15212|chr3L|+	0.82	0.66	-0.16
NM_001260437|Fer1HCH|chr3R|-	0.98	0.83	-0.15
NM_001276175|Fer1HCH|chr3R|-	0.98	0.83	-0.15
NM_164434|Eno|chr2L|-	0.95	0.8	-0.15
NM_058089|Vha13|chr3R|-	0.41	0.26	-0.15
NM_001202115|Scsalpha|chr3L|+	1	0.85	-0.15
NM_079637|Tm2|chr3R|+	0.74	0.59	-0.15
NM_001259024|Gdi|chr2L|-	0.27	0.12	-0.15
NM_079386|mbf1|chr3L|+	1	0.85	-0.15
NM_130724|VhaAC39-1|chrX|+	0.52	0.37	-0.15
NM_164677|slmo|chr2L|-	1	0.85	-0.15
NM_167928|CG1140|chr3L|+	0.92	0.77	-0.15
NM_205966|vir-1|chr2L|-	0.57	0.42	-0.15
NM_169629|eIF-2gamma|chr3R|-	0.42	0.27	-0.15
NM_141533|Ctr1B|chr3R|+	0.48	0.33	-0.15
NM_137982|CG5532|chr2R|+	0.7	0.55	-0.15
NM_144309|CG14933|chr2L|+	0.3	0.15	-0.15
NM_141655|CG9396|chr3R|-	0.92	0.77	-0.15
NM_001169767|Sdc|chr2R|-	0.96	0.81	-0.15
NM_130576|CG3740|chrX|-	1	0.85	-0.15
NM_164888|CG13135|chr2L|-	1	0.85	-0.15
NM_137811|CG3264|chr2R|-	1	0.85	-0.15
NM_168158|Cpr65Av|chr3L|-	0.47	0.32	-0.15
NM_079945|crl|chrX|+	0.25	0.1	-0.15
NM_079770|OstStt3|chr3R|-	0.72	0.57	-0.15
NM_057720|cni|chr2L|-	0.38	0.23	-0.15
NM_079583|Rbp1|chr3R|+	0.35	0.2	-0.15
NM_167276|Dlic|chrX|+	0.94	0.79	-0.15
NM_001259089|CG16974|chr2L|-	0.2	0.05	-0.15
NM_167693|Sdic3|chrX|-	0.47	0.32	-0.15
NM_001103634|CG34310|chr2L|+	0.5	0.35	-0.15
NM_136277|CG1416|chr2L|+	0.47	0.32	-0.15
NM_166988|HIP-R|chrX|+	0.6	0.45	-0.15
[truncated: 1,244 more rows]
