# Supplementary material
Source: HighWire-hosted journal article supplement (doi:10.1101/rna.057208.116)
Supplement: Supplemental_Tables_S9-S11.xlsx [file Supplemental_Tables_S9-S11.xlsx]

## Sheet: overlap_Phax_SMN
	Supplemental Table S9: Overlapping splicing pattern changes in PhaxSH/SH and SmnX7/D mutants.
	gene	event_name	type	oregonR_posterior_mean	oregonR_ci_low	oregonR_ci_high	phax_posterior_mean	phax_ci_low	phax_ci_high	diff	bayes_factor	isoforms	oregonR_counts	oregonR_assigned_counts	phax_counts	phax_assigned_counts	chrom	strand	mRNA_starts	mRNA_ends
1	CG11151, Grip91	chrX:13633777:13633893:+@chrX:13633982:13634145:+	ri	0.12	0.11	0.14	0.84	0.82	0.85	-0.72	1000000000000	'chrX:13633777:13633893:+@chrX:13633982:13634145:+.A.withRI','chrX:13633777:13633893:+@chrX:13633982:13634145:+.B.up_chrX:13633777:13633893:+@chrX:13633982:13634145:+.B.dn'	(0,0):3910,(0,1):744,(1,0):331,(1,1):1247	0:480,1:1842	(0,0):5170,(0,1):290,(1,0):3059,(1,1):385	0:3386,1:348	chrX	+	1363377713633770	1363414513634140
2	RpS21	chr2L:2856392:2856568:+@chr2L:2856631:2856672:+	ri	0.2	0.19	0.21	0.9	0.88	0.92	-0.7	1000000000000	'chr2L:2856392:2856568:+@chr2L:2856631:2856672:+.A.withRI','chr2L:2856392:2856568:+@chr2L:2856631:2856672:+.B.up_chr2L:2856392:2856568:+@chr2L:2856631:2856672:+.B.dn'	(0,0):5515,(0,1):1281,(1,0):1112,(1,1):3032	0:1684,1:3741	(0,0):4562,(0,1):119,(1,0):4506,(1,1):3285	0:7465,1:445	chr2L	+	28563922856392	28566722856672
3	Abi	chr3R:9948085:9948138:-@chr3R:9947468:9947834:-	ri	0.25	0.17	0.34	0.89	0.74	0.98	-0.64	1000000000000	'chr3R:9948085:9948138:-@chr3R:9947468:9947834:-.A.withRI','chr3R:9948085:9948138:-@chr3R:9947468:9947834:-.B.dn_chr3R:9948085:9948138:-@chr3R:9947468:9947834:-.B.up'	(0,0):103,(1,0):34,(1,1):130	0:59,1:105	(0,0):83,(1,0):135,(1,1):132	0:263,1:4	chr3R	-	99474689947468	99481389948138
4	CG10625	chr3L:5533591:5533659:-@chr3L:5533276:5533348:-@chr3L:5532404:5532953:-	se	0.28	0.19	0.38	0.91	0.88	0.93	-0.63	1000000000000	'chr3L:5533591:5533659:-@chr3L:5533276:5533348:-@chr3L:5532404:5532953:-.A.dn_chr3L:5533591:5533659:-@chr3L:5533276:5533348:-@chr3L:5532404:5532953:-.A.se_chr3L:5533591:5533659:-@chr3L:5533276:5533348:-@chr3L:5532404:5532953:-.A.up','chr3L:5533591:5533659:-@chr3L:5533276:5533348:-@chr3L:5532404:5532953:-.B.dn_chr3L:5533591:5533659:-@chr3L:5533276:5533348:-@chr3L:5532404:5532953:-.B.up'	(0,0):1218,(1,0):37,(1,1):809	0:291,1:555	(0,0):7524,(0,1):13,(1,0):1281,(1,1):6102	0:6815,1:581	chr3L	-	55324045532404	55336595533659
5	RpS21	chr2L:2856377:2856572:+@chr2L:2856631:2856672:+	ri	0.39	0.37	0.42	1	1	1	-0.61	1000000000000	'chr2L:2856377:2856572:+@chr2L:2856631:2856672:+.A.withRI','chr2L:2856377:2856572:+@chr2L:2856631:2856672:+.B.up_chr2L:2856377:2856572:+@chr2L:2856631:2856672:+.B.dn'	(0,0):7765,(1,0):1186,(1,1):4364	0:2957,1:2593	(0,0):3923,(1,0):5028,(1,1):4629	0:9651,1:6	chr2L	+	28563772856377	28566722856672
6	CG7149	chr2L:7787031:7786990|7786701:-@chr2L:7786157:7786424:-	a5ss	0.27	0.18	0.38	0.88	0.74	0.97	-0.61	1000000000000	'chr2L:7787031:7786990|7786701:-@chr2L:7786157:7786424:-.A.dn_chr2L:7787031:7786990|7786701:-@chr2L:7786157:7786424:-.A.coreAndExt','chr2L:7787031:7786990|7786701:-@chr2L:7786157:7786424:-.B.dn_chr2L:7787031:7786990|7786701:-@chr2L:7786157:7786424:-.B.core'	(0,0):116,(0,1):14,(1,0):42,(1,1):38	0:51,1:43	(0,0):170,(0,1):2,(1,0):92,(1,1):9	0:98,1:5	chr2L	-	77861577786157	77870317787031
7	RpL22	chrX:657474:657827:-@chrX:657116:657266:-	ri	0.31	0.25	0.39	0.91	0.81	0.98	-0.6	1000000000000	'chrX:657474:657827:-@chrX:657116:657266:-.A.withRI','chrX:657474:657827:-@chrX:657116:657266:-.B.dn_chrX:657474:657827:-@chrX:657116:657266:-.B.up'	(0,0):242,(0,1):2,(1,0):92,(1,1):440	0:203,1:331	(0,0):330,(0,1):3,(1,0):236,(1,1):292	0:510,1:21	chrX	-	657116657116	657827657827
8	CG4630	chr2R:9106593:9106722:-@chr2R:9105094:9105704:-	ri	0.06	0.03	0.1	0.66	0.4	0.87	-0.6	1.41186e+08	'chr2R:9106593:9106722:-@chr2R:9105094:9105704:-.A.withRI','chr2R:9106593:9106722:-@chr2R:9105094:9105704:-.B.dn_chr2R:9106593:9106722:-@chr2R:9105094:9105704:-.B.up'	(0,0):46,(0,1):13,(1,0):13,(1,1):113	0:23,1:116	(0,0):5,(0,1):1,(1,0):14,(1,1):7	0:20,1:2	chr2R	-	91050949105094	91067229106722
9	CG33057, mkg-p	chr3L:8398314:8398372:-@chr3L:8397203:8397610:-	ri	0.39	0.3	0.49	0.95	0.92	0.98	-0.56	1000000000000	'chr3L:8398314:8398372:-@chr3L:8397203:8397610:-.A.withRI','chr3L:8398314:8398372:-@chr3L:8397203:8397610:-.B.dn_chr3L:8398314:8398372:-@chr3L:8397203:8397610:-.B.up'	(0,0):23,(0,1):14,(1,0):95,(1,1):65	0:121,1:53	(0,0):35,(0,1):8,(1,0):727,(1,1):47	0:770,1:12	chr3L	-	83972038397203	83983728398372
10	JTBR	chr3L:1802804:1802835:-@chr3L:1802008:1802743:-	ri	0.34	0.25	0.44	0.88	0.79	0.94	-0.54	1000000000000	'chr3L:1802804:1802835:-@chr3L:1802008:1802743:-.A.withRI','chr3L:1802804:1802835:-@chr3L:1802008:1802743:-.B.dn_chr3L:1802804:1802835:-@chr3L:1802008:1802743:-.B.up'	(0,0):44,(0,1):41,(1,0):36,(1,1):389	0:163,1:303	(0,0):29,(0,1):6,(1,0):80,(1,1):287	0:340,1:33	chr3L	-	18020081802008	18028351802835
11	sca	chr2R:8671854:8672247:+@chr2R:8686765:8687295:+	ri	0.06	0.04	0.08	0.59	0.38	0.8	-0.53	1000000000000	'chr2R:8671854:8672247:+@chr2R:8686765:8687295:+.A.withRI','chr2R:8671854:8672247:+@chr2R:8686765:8687295:+.B.up_chr2R:8671854:8672247:+@chr2R:8686765:8687295:+.B.dn'	(0,0):6,(0,1):23,(1,0):76,(1,1):42	0:79,1:62	(0,0):1,(0,1):3,(1,0):187,(1,1):9	0:192,1:7	chr2R	+	86718548671854	86872958687295
12	CG8176	chr3R:5348017:5348436:+@chr3R:5349258:5349518:+	ri	0.39	0.29	0.49	0.92	0.78	0.98	-0.53	1000000000000	'chr3R:5348017:5348436:+@chr3R:5349258:5349518:+.A.withRI','chr3R:5348017:5348436:+@chr3R:5349258:5349518:+.B.up_chr3R:5348017:5348436:+@chr3R:5349258:5349518:+.B.dn'	(0,0):65,(0,1):7,(1,0):80,(1,1):107	0:112,1:82	(0,0):73,(0,1):1,(1,0):184,(1,1):89	0:263,1:11	chr3R	+	53480175348017	53495185349518
13	vig2	chr3R:20949180:20949205:+@chr3R:20949354:20949837:+	ri	0.28	0.24	0.31	0.81	0.76	0.85	-0.53	1000000000000	'chr3R:20949180:20949205:+@chr3R:20949354:20949837:+.A.withRI','chr3R:20949180:20949205:+@chr3R:20949354:20949837:+.B.up_chr3R:20949180:20949205:+@chr3R:20949354:20949837:+.B.dn'	(0,0):239,(0,1):113,(1,0):267,(1,1):1544	0:670,1:1254	(0,0):158,(0,1):30,(1,0):1145,(1,1):2564	0:3208,1:531	chr3R	+	2094918020949180	2094983720949830
14	CG7149	chr2L:7786990:7787031:-@chr2L:7786157:7786424:-	ri	0.4	0.3	0.51	0.92	0.84	0.98	-0.52	1000000000000	'chr2L:7786990:7787031:-@chr2L:7786157:7786424:-.A.withRI','chr2L:7786990:7787031:-@chr2L:7786157:7786424:-.B.dn_chr2L:7786990:7787031:-@chr2L:7786157:7786424:-.B.up'	(0,0):28,(0,1):14,(1,0):130,(1,1):38	0:143,1:39	(0,0):41,(0,1):2,(1,0):221,(1,1):9	0:230,1:2	chr2L	-	77861577786157	77870317787031
15	CG8369	chr3R:4647666:4647847:+@chr3R:4648191:4648388:+	ri	0.08	0.08	0.09	0.6	0.55	0.64	-0.52	1000000000000	'chr3R:4647666:4647847:+@chr3R:4648191:4648388:+.A.withRI','chr3R:4647666:4647847:+@chr3R:4648191:4648388:+.B.up_chr3R:4647666:4647847:+@chr3R:4648191:4648388:+.B.dn'	(0,0):2243,(0,1):2913,(1,0):1020,(1,1):1563	0:1160,1:4336	(0,0):242,(0,1):101,(1,0):611,(1,1):176	0:704,1:184	chr3R	+	46476664647666	46483884648388
16	Hus1-like	chr3R:637730:637705|636394:-@chr3R:634084:634996:-	a5ss	0.02	0	0.03	0.54	0.26	0.79	-0.52	514645	'chr3R:637730:637705|636394:-@chr3R:634084:634996:-.A.dn_chr3R:637730:637705|636394:-@chr3R:634084:634996:-.A.coreAndExt','chr3R:637730:637705|636394:-@chr3R:634084:634996:-.B.dn_chr3R:637730:637705|636394:-@chr3R:634084:634996:-.B.core'	(0,0):28,(0,1):5,(1,0):3,(1,1):143	0:7,1:144	(0,0):25,(1,0):21,(1,1):25	0:35,1:11	chr3R	-	634084634084	637730637730
17	sra	chr3R:12012695:12013021:+@chr3R:12021757:12023357:+	ri	0.01	0.01	0.01	0.51	0.48	0.53	-0.5	1000000000000	'chr3R:12012695:12013021:+@chr3R:12021757:12023357:+.A.withRI','chr3R:12012695:12013021:+@chr3R:12021757:12023357:+.B.up_chr3R:12012695:12013021:+@chr3R:12021757:12023357:+.B.dn'	(0,0):103,(0,1):56,(1,0):43,(1,1):991	0:50,1:1040	(0,0):566,(0,1):134,(1,0):5963,(1,1):2016	0:6997,1:1116	chr3R	+	1201269512012690	1202335712023350
18	Vha55	chr3R:8453362:8453491:-@chr3R:8453171:8453283:-	ri	0.15	0.13	0.17	0.64	0.62	0.66	-0.49	1000000000000	'chr3R:8453362:8453491:-@chr3R:8453171:8453283:-.A.withRI','chr3R:8453362:8453491:-@chr3R:8453171:8453283:-.B.dn_chr3R:8453362:8453491:-@chr3R:8453171:8453283:-.B.up'	(0,0):726,(0,1):43,(1,0):200,(1,1):899	0:272,1:870	(0,0):655,(0,1):90,(1,0):3072,(1,1):2269	0:4225,1:1206	chr3R	-	84531718453171	84534918453491
19	alphaCOP	chr3L:1645170:1645223:-@chr3L:1644012:1645061:-	ri	0.39	0.3	0.47	0.87	0.82	0.9	-0.48	1000000000000	'chr3L:1645170:1645223:-@chr3L:1644012:1645061:-.A.withRI','chr3L:1645170:1645223:-@chr3L:1644012:1645061:-.B.dn_chr3L:1645170:1645223:-@chr3L:1644012:1645061:-.B.up'	(0,0):78,(0,1):41,(1,0):68,(1,1):877	0:469,1:517	(0,0):86,(0,1):29,(1,0):393,(1,1):1749	0:1915,1:256	chr3L	-	16440121644012	16452231645223
20	cnc	chr3R:19044971:19043601|19035705:-@chr3R:19035330:19035605:-	a5ss	0.08	0.06	0.09	0.56	0.51	0.61	-0.48	1000000000000	'chr3R:19044971:19043601|19035705:-@chr3R:19035330:19035605:-.A.dn_chr3R:19044971:19043601|19035705:-@chr3R:19035330:19035605:-.A.coreAndExt','chr3R:19044971:19043601|19035705:-@chr3R:19035330:19035605:-.B.dn_chr3R:19044971:19043601|19035705:-@chr3R:19035330:19035605:-.B.core'	(0,0):176,(0,1):50,(1,0):180,(1,1):364	0:200,1:394	(0,0):242,(0,1):43,(1,0):1345,(1,1):332	0:1531,1:189	chr3R	-	1903533019035330	1904497119044970
21	SclA, SclB	chr2L:16840165:16840208:+@chr2L:16840274:16840578:+	ri	0.2	0.15	0.25	0.67	0.61	0.73	-0.47	1000000000000	'chr2L:16840165:16840208:+@chr2L:16840274:16840578:+.A.withRI','chr2L:16840165:16840208:+@chr2L:16840274:16840578:+.B.up_chr2L:16840165:16840208:+@chr2L:16840274:16840578:+.B.dn'	(0,0):1004,(1,0):54,(1,1):655	0:187,1:522	(0,0):2789,(0,1):4,(1,0):568,(1,1):2016	0:1969,1:619	chr2L	+	1684016516840160	1684057816840570
22	Myb	chrX:15751674:15751694:-@chrX:15749823:15751578:-	ri	0.26	0.16	0.39	0.73	0.56	0.88	-0.47	74.86	'chrX:15751674:15751694:-@chrX:15749823:15751578:-.A.withRI','chrX:15751674:15751694:-@chrX:15749823:15751578:-.B.dn_chrX:15751674:15751694:-@chrX:15749823:15751578:-.B.up'	(0,0):130,(0,1):7,(1,0):24,(1,1):1374	0:603,1:802	(0,0):107,(0,1):1,(1,0):59,(1,1):1324	0:1029,1:355	chrX	-	1574982315749820	1575169415751690
23	EfTuM, mip120	chr2R:9395087:9395163:+@chr2R:9395220:9396130:+	ri	0.08	0.05	0.12	0.54	0.5	0.57	-0.46	1000000000000	'chr2R:9395087:9395163:+@chr2R:9395220:9396130:+.A.withRI','chr2R:9395087:9395163:+@chr2R:9395220:9396130:+.B.up_chr2R:9395087:9395163:+@chr2R:9395220:9396130:+.B.dn'	(0,0):212,(0,1):106,(1,0):21,(1,1):1558	0:123,1:1562	(0,0):920,(0,1):255,(1,0):662,(1,1):6789	0:4357,1:3349	chr2R	+	93950879395087	93961309396130
24	loj	chr3L:6088066:6088117:+@chr3L:6088213:6088443:+	ri	0.3	0.24	0.35	0.75	0.7	0.81	-0.45	1000000000000	'chr3L:6088066:6088117:+@chr3L:6088213:6088443:+.A.withRI','chr3L:6088066:6088117:+@chr3L:6088213:6088443:+.B.up_chr3L:6088066:6088117:+@chr3L:6088213:6088443:+.B.dn'	(0,0):104,(0,1):85,(1,0):113,(1,1):158	0:154,1:202	(0,0):67,(0,1):42,(1,0):359,(1,1):149	0:464,1:86	chr3L	+	60880666088066	60884436088443
25	sra	chr3R:12012695:12013021:+@chr3R:12021753:12023357:+	ri	0.01	0	0.01	0.46	0.44	0.48	-0.45	1000000000000	'chr3R:12012695:12013021:+@chr3R:12021753:12023357:+.A.withRI','chr3R:12012695:12013021:+@chr3R:12021753:12023357:+.B.up_chr3R:12012695:12013021:+@chr3R:12021753:12023357:+.B.dn'	(0,0):44,(0,1):115,(1,0):36,(1,1):998	0:40,1:1109	(0,0):445,(0,1):255,(1,0):5955,(1,1):2024	0:6942,1:1292	chr3R	+	1201269512012690	1202335712023350
26	Vha55	chr3R:8453362:8453491:-@chr3R:8453171:8453297:-	ri	0.04	0.03	0.05	0.49	0.47	0.5	-0.45	1000000000000	'chr3R:8453362:8453491:-@chr3R:8453171:8453297:-.A.withRI','chr3R:8453362:8453491:-@chr3R:8453171:8453297:-.B.dn_chr3R:8453362:8453491:-@chr3R:8453171:8453297:-.B.up'	(0,0):250,(0,1):519,(1,0):83,(1,1):1016	0:107,1:1511	(0,0):146,(0,1):599,(1,0):2715,(1,1):2626	0:3671,1:2269	chr3R	-	84531718453171	84534918453491
27	CkIIbeta	chrX:11689138:11689219:+@chrX:11690637:11691278:+	ri	0.46	0.41	0.53	0.9	0.82	0.97	-0.44	1000000000000	'chrX:11689138:11689219:+@chrX:11690637:11691278:+.A.withRI','chrX:11689138:11689219:+@chrX:11690637:11691278:+.B.up_chrX:11689138:11689219:+@chrX:11690637:11691278:+.B.dn'	(0,0):388,(0,1):4,(1,0):578,(1,1):456	0:778,1:260	(0,0):628,(0,1):1,(1,0):1335,(1,1):544	0:1813,1:67	chrX	+	1168913811689130	1169127811691270
28	CG4887	chr2L:1175047:1175173:+@chr2L:1175287:1175523:+	ri	0.1	0.05	0.18	0.53	0.35	0.69	-0.43	151357	'chr2L:1175047:1175173:+@chr2L:1175287:1175523:+.A.withRI','chr2L:1175047:1175173:+@chr2L:1175287:1175523:+.B.up_chr2L:1175047:1175173:+@chr2L:1175287:1175523:+.B.dn'	(0,0):31,(0,1):20,(1,0):7,(1,1):31	0:7,1:51	(0,0):31,(0,1):9,(1,0):27,(1,1):16	0:35,1:17	chr2L	+	11750471175047	11755231175523
29	Cpr49Ac	chr2R:8276023:8276038:+@chr2R:8276428:8276591:+	ri	0.03	0.03	0.04	0.45	0.37	0.54	-0.42	1000000000000	'chr2R:8276023:8276038:+@chr2R:8276428:8276591:+.A.withRI','chr2R:8276023:8276038:+@chr2R:8276428:8276591:+.B.up_chr2R:8276023:8276038:+@chr2R:8276428:8276591:+.B.dn'	(0,0):1055,(0,1):136,(1,0):202,(1,1):369	0:217,1:490	(0,0):398,(0,1):19,(1,0):430,(1,1):49	0:451,1:47	chr2R	+	82760238276023	82765918276591
30	CG11876	chr3R:24938789:24938862:+@chr3R:24938931:24939171:+	ri	0.07	0.05	0.09	0.49	0.46	0.52	-0.42	1000000000000	'chr3R:24938789:24938862:+@chr3R:24938931:24939171:+.A.withRI','chr3R:24938789:24938862:+@chr3R:24938931:24939171:+.B.up_chr3R:24938789:24938862:+@chr3R:24938931:24939171:+.B.dn'	(0,0):257,(0,1):144,(1,0):32,(1,1):442	0:61,1:557	(0,0):553,(0,1):305,(1,0):749,(1,1):1081	0:1280,1:855	chr3R	+	2493878924938780	2493917124939170
31	CG9684	chr3R:4186023:4186228:-@chr3R:4185680:4185968:-	ri	0.07	0.02	0.16	0.49	0.34	0.66	-0.42	1000000000000	'chr3R:4186023:4186228:-@chr3R:4185680:4185968:-.A.withRI','chr3R:4186023:4186228:-@chr3R:4185680:4185968:-.B.dn_chr3R:4186023:4186228:-@chr3R:4185680:4185968:-.B.up'	(0,0):22,(0,1):39,(1,0):4,(1,1):43	0:7,1:79	(0,0):10,(0,1):13,(1,0):19,(1,1):35	0:36,1:31	chr3R	-	41856804185680	41862284186228
32	CG3209	chr2R:19957523:19957765:+@chr2R:19959514:19959747:+	ri	0.14	0.13	0.16	0.55	0.48	0.63	-0.41	1000000000000	'chr2R:19957523:19957765:+@chr2R:19959514:19959747:+.A.withRI','chr2R:19957523:19957765:+@chr2R:19959514:19959747:+.B.up_chr2R:19957523:19957765:+@chr2R:19959514:19959747:+.B.dn'	(0,0):1169,(0,1):65,(1,0):508,(1,1):480	0:584,1:469	(0,0):1208,(0,1):16,(1,0):751,(1,1):185	0:836,1:116	chr2R	+	1995752319957520	1995974719959740
33	TpnC47D	chr2R:7162956:7163298:-@chr2R:7162395:7162569:-	ri	0.43	0.36	0.52	0.84	0.74	0.92	-0.41	1000000000000	'chr2R:7162956:7163298:-@chr2R:7162395:7162569:-.A.withRI','chr2R:7162956:7163298:-@chr2R:7162395:7162569:-.B.dn_chr2R:7162956:7163298:-@chr2R:7162395:7162569:-.B.up'	(0,0):1100,(0,1):2,(1,0):174,(1,1):332	0:318,1:190	(0,0):2489,(0,1):3,(1,0):420,(1,1):394	0:787,1:30	chr2R	-	71623957162395	71632987163298
34	CG8004	chr3L:19920671:19921380:-@chr3L:19920283:19920369:-	ri	0.48	0.4	0.58	0.89	0.81	0.96	-0.41	1000000000000	'chr3L:19920671:19921380:-@chr3L:19920283:19920369:-.A.withRI','chr3L:19920671:19921380:-@chr3L:19920283:19920369:-.B.dn_chr3L:19920671:19921380:-@chr3L:19920283:19920369:-.B.up'	(0,0):51,(0,1):6,(1,0):122,(1,1):471	0:355,1:244	(0,0):77,(0,1):1,(1,0):364,(1,1):757	0:1005,1:117	chr3L	-	1992028319920280	1992138019921380
35	Rcc1	chr3L:5925625:5925767:-@chr3L:5924718:5925417:-	ri	0.37	0.29	0.49	0.78	0.69	0.87	-0.41	1000000000000	'chr3L:5925625:5925767:-@chr3L:5924718:5925417:-.A.withRI','chr3L:5925625:5925767:-@chr3L:5924718:5925417:-.B.dn_chr3L:5925625:5925767:-@chr3L:5924718:5925417:-.B.up'	(0,0):111,(0,1):1,(1,0):58,(1,1):485	0:283,1:261	(0,0):138,(0,1):7,(1,0):203,(1,1):612	0:741,1:81	chr3L	-	59247185924718	59257675925767
36	Aats-gly	chr3L:15088282:15088285:+@chr3L:15088355:15090790:+	ri	0.1	0.05	0.18	0.51	0.42	0.62	-0.41	1000000000000	'chr3L:15088282:15088285:+@chr3L:15088355:15090790:+.A.withRI','chr3L:15088282:15088285:+@chr3L:15088355:15090790:+.B.up_chr3L:15088282:15088285:+@chr3L:15088355:15090790:+.B.dn'	(0,0):125,(1,0):7,(1,1):2616	0:410,1:2213	(0,0):380,(1,0):92,(1,1):6107	0:3063,1:3136	chr3L	+	1508828215088280	1509079015090790
37	CG11779	chr3R:14982188:14982268:-@chr3R:14981587:14982124:-	ri	0.21	0.12	0.33	0.62	0.54	0.69	-0.41	1000000000000	'chr3R:14982188:14982268:-@chr3R:14981587:14982124:-.A.withRI','chr3R:14982188:14982268:-@chr3R:14981587:14982124:-.B.dn_chr3R:14982188:14982268:-@chr3R:14981587:14982124:-.B.up'	(0,0):52,(0,1):10,(1,0):11,(1,1):220	0:75,1:166	(0,0):201,(0,1):33,(1,0):147,(1,1):615	0:546,1:249	chr3R	-	1498158714981580	1498226814982260
38	Rpn2	chr3R:24979164:24979330:+@chr3R:24979418:24980395:+	ri	0.35	0.3	0.41	0.76	0.71	0.82	-0.41	1000000000000	'chr3R:24979164:24979330:+@chr3R:24979418:24980395:+.A.withRI','chr3R:24979164:24979330:+@chr3R:24979418:24980395:+.B.up_chr3R:24979164:24979330:+@chr3R:24979418:24980395:+.B.dn'	(0,0):139,(0,1):76,(1,0):118,(1,1):1671	0:674,1:1191	(0,0):283,(0,1):37,(1,0):308,(1,1):1938	0:1793,1:490	chr3R	+	2497916424979160	2498039524980390
39	CG32736, CG42308	chrX:6905394:6905441:+@chrX:6905527:6905789:+	ri	0.07	0.03	0.13	0.48	0.42	0.54	-0.41	1000000000000	'chrX:6905394:6905441:+@chrX:6905527:6905789:+.A.withRI','chrX:6905394:6905441:+@chrX:6905527:6905789:+.B.up_chrX:6905394:6905441:+@chrX:6905527:6905789:+.B.dn'	(0,0):58,(0,1):28,(1,0):7,(1,1):90	0:18,1:107	(0,0):224,(0,1):92,(1,0):221,(1,1):238	0:328,1:223	chrX	+	69053946905394	69057896905789
40	Dhap-at	chr3R:21315924:21315992:-@chr3R:21314246:21314825:-	ri	0.15	0.08	0.24	0.56	0.4	0.75	-0.41	6383.63	'chr3R:21315924:21315992:-@chr3R:21314246:21314825:-.A.withRI','chr3R:21315924:21315992:-@chr3R:21314246:21314825:-.B.dn_chr3R:21315924:21315992:-@chr3R:21314246:21314825:-.B.up'	(0,0):15,(0,1):1,(1,0):16,(1,1):48	0:25,1:40	(0,0):11,(1,0):76,(1,1):59	0:114,1:21	chr3R	-	2131424621314240	2131599221315990
41	CG9691	chrX:9778475:9778901:+@chrX:9778971:9779079:+	ri	0.56	0.53	0.59	0.96	0.94	0.97	-0.4	1000000000000	'chrX:9778475:9778901:+@chrX:9778971:9779079:+.A.withRI','chrX:9778475:9778901:+@chrX:9778971:9779079:+.B.up_chrX:9778475:9778901:+@chrX:9778971:9779079:+.B.dn'	(0,0):76,(0,1):306,(1,0):823,(1,1):2811	0:2404,1:1536	(0,0):71,(0,1):69,(1,0):2456,(1,1):3054	0:5389,1:190	chrX	+	97784759778475	97790799779079
42	CG9331	chr2L:20824594:20824724:+@chr2L:20825272:20825512:+	ri	0.3	0.2	0.43	0.7	0.6	0.81	-0.4	4.38615e+06	'chr2L:20824594:20824724:+@chr2L:20825272:20825512:+.A.withRI','chr2L:20824594:20824724:+@chr2L:20825272:20825512:+.B.up_chr2L:20824594:20824724:+@chr2L:20825272:20825512:+.B.dn'	(0,0):60,(0,1):8,(1,0):41,(1,1):30	0:50,1:29	(0,0):220,(0,1):4,(1,0):367,(1,1):153	0:459,1:65	chr2L	+	2082459420824590	2082551220825510
43	Myb	chrX:15751683:15751694:-@chrX:15749823:15751578:-	ri	0.28	0.18	0.38	0.68	0.52	0.82	-0.4	706853	'chrX:15751683:15751694:-@chrX:15749823:15751578:-.A.withRI','chrX:15751683:15751694:-@chrX:15749823:15751578:-.B.dn_chrX:15751683:15751694:-@chrX:15749823:15751578:-.B.up'	(0,0):137,(1,0):24,(1,1):1374	0:408,1:990	(0,0):108,(1,0):59,(1,1):1324	0:1126,1:257	chrX	-	1574982315749820	1575169415751690
44	Art3	chr3R:11054956:11055103:-@chr3R:11053327:11054901:-	ri	0.12	0.04	0.24	0.52	0.35	0.73	-0.4	86.44	'chr3R:11054956:11055103:-@chr3R:11053327:11054901:-.A.withRI','chr3R:11054956:11055103:-@chr3R:11053327:11054901:-.B.dn_chr3R:11054956:11055103:-@chr3R:11053327:11054901:-.B.up'	(0,0):40,(0,1):3,(1,0):4,(1,1):598	0:53,1:552	(0,0):36,(0,1):1,(1,0):18,(1,1):441	0:248,1:212	chr3R	-	1105332711053320	1105510311055100
45	CG13319	chr2R:8811324:8811856:+@chr2R:8811927:8812157:+	ri	0.08	0.04	0.13	0.47	0.39	0.54	-0.39	1000000000000	'chr2R:8811324:8811856:+@chr2R:8811927:8812157:+.A.withRI','chr2R:8811324:8811856:+@chr2R:8811927:8812157:+.B.up_chr2R:8811324:8811856:+@chr2R:8811927:8812157:+.B.dn'	(0,0):85,(0,1):21,(1,0):8,(1,1):398	0:48,1:379	(0,0):138,(0,1):25,(1,0):99,(1,1):617	0:375,1:366	chr2R	+	88113248811324	88121578812157
46	Muted, CG7071	chr3R:18188619:18188668:+@chr3R:18188729:18189009:+	ri	0.07	0.03	0.12	0.46	0.37	0.55	-0.39	1000000000000	'chr3R:18188619:18188668:+@chr3R:18188729:18189009:+.A.withRI','chr3R:18188619:18188668:+@chr3R:18188729:18189009:+.B.up_chr3R:18188619:18188668:+@chr3R:18188729:18189009:+.B.dn'	(0,0):33,(0,1):50,(1,0):8,(1,1):133	0:19,1:172	(0,0):45,(0,1):37,(1,0):77,(1,1):174	0:150,1:138	chr3R	+	1818861918188610	1818900918189000
47	Lgr4, CG32641	chrX:13078498:13078553:+@chrX:13078607:13079210:+	ri	0.47	0.39	0.54	0.85	0.8	0.9	-0.38	1000000000000	'chrX:13078498:13078553:+@chrX:13078607:13079210:+.A.withRI','chrX:13078498:13078553:+@chrX:13078607:13079210:+.B.up_chrX:13078498:13078553:+@chrX:13078607:13079210:+.B.dn'	(0,0):3,(0,1):62,(1,0):109,(1,1):931	0:494,1:608	(0,0):2,(0,1):26,(1,0):229,(1,1):640	0:760,1:135	chrX	+	1307849813078490	1307921013079210
48	CG34179, slmo	chr2L:6047900:6047941:-@chr2L:6046654:6047780:-	ri	0.29	0.25	0.34	0.66	0.62	0.69	-0.37	1000000000000	'chr2L:6047900:6047941:-@chr2L:6046654:6047780:-.A.withRI','chr2L:6047900:6047941:-@chr2L:6046654:6047780:-.B.dn_chr2L:6047900:6047941:-@chr2L:6046654:6047780:-.B.up'	(0,0):60,(0,1):117,(1,0):137,(1,1):2337	0:947,1:1644	(0,0):126,(0,1):181,(1,0):741,(1,1):4359	0:3702,1:1579	chr2L	-	60466546046654	60479416047941
49	CG5819	chr2R:18180950:18181256:+@chr2R:18181430:18182699:+	ri	0.12	0.08	0.17	0.48	0.4	0.56	-0.36	1000000000000	'chr2R:18180950:18181256:+@chr2R:18181430:18182699:+.A.withRI','chr2R:18180950:18181256:+@chr2R:18181430:18182699:+.B.up_chr2R:18180950:18181256:+@chr2R:18181430:18182699:+.B.dn'	(0,0):65,(0,1):71,(1,0):24,(1,1):841	0:166,1:770	(0,0):67,(0,1):42,(1,0):100,(1,1):843	0:498,1:487	chr2R	+	1818095018180950	1818269918182690
50	Prosalpha5	chr2R:13300264:13300348:+@chr2R:13300410:13300548:+	ri	0.01	0.01	0.02	0.37	0.32	0.42	-0.36	1000000000000	'chr2R:13300264:13300348:+@chr2R:13300410:13300548:+.A.withRI','chr2R:13300264:13300348:+@chr2R:13300410:13300548:+.B.up_chr2R:13300264:13300348:+@chr2R:13300410:13300548:+.B.dn'	(0,0):238,(0,1):268,(1,0):10,(1,1):261	0:13,1:526	(0,0):91,(0,1):101,(1,0):182,(1,1):156	0:221,1:218	chr2R	+	1330026413300260	1330054813300540
51	CG42666	chrX:1744653:1746854:+@chrX:1747475:1747660:+	ri	0.61	0.47	0.78	0.97	0.91	1	-0.36	99.95	'chrX:1744653:1746854:+@chrX:1747475:1747660:+.A.withRI','chrX:1744653:1746854:+@chrX:1747475:1747660:+.B.up_chrX:1744653:1746854:+@chrX:1747475:1747660:+.B.dn'	(0,0):27,(1,0):65,(1,1):382	0:296,1:151	(0,0):28,(1,0):185,(1,1):504	0:677,1:12	chrX	+	17446531744653	17476601747660
52	hbs	chr2R:10898902:10899335:+@chr2R:10923486:10924013:+	ri	0.45	0.32	0.64	0.81	0.72	0.9	-0.36	88.14	'chr2R:10898902:10899335:+@chr2R:10923486:10924013:+.A.withRI','chr2R:10898902:10899335:+@chr2R:10923486:10924013:+.B.up_chr2R:10898902:10899335:+@chr2R:10923486:10924013:+.B.dn'	(0,0):8,(0,1):4,(1,0):463,(1,1):27	0:474,1:20	(0,0):14,(0,1):7,(1,0):1839,(1,1):32	0:1867,1:11	chr2R	+	1089890210898900	1092401310924010
53	Unc-89	chr2R:19898446:19898504:-@chr2R:19897094:19898306:-@chr2R:19895357:19895668:-	se	0.06	0.02	0.16	0.42	0.24	0.65	-0.36	1461.43	'chr2R:19898446:19898504:-@chr2R:19897094:19898306:-@chr2R:19895357:19895668:-.A.dn_chr2R:19898446:19898504:-@chr2R:19897094:19898306:-@chr2R:19895357:19895668:-.A.se_chr2R:19898446:19898504:-@chr2R:19897094:19898306:-@chr2R:19895357:19895668:-.A.up','chr2R:19898446:19898504:-@chr2R:19897094:19898306:-@chr2R:19895357:19895668:-.B.dn_chr2R:19898446:19898504:-@chr2R:19897094:19898306:-@chr2R:198953…	(0,0):32,(1,0):4,(1,1):14	0:7,1:11	(0,0):117,(0,1):2,(1,0):49,(1,1):15	0:53,1:13	chr2R	-	1989535719895350	1989850419898500
54	Vps25	chr2R:4512956:4513080:+@chr2R:4513133:4513793:+	ri	0.06	0.03	0.08	0.41	0.35	0.47	-0.35	1000000000000	'chr2R:4512956:4513080:+@chr2R:4513133:4513793:+.A.withRI','chr2R:4512956:4513080:+@chr2R:4513133:4513793:+.B.up_chr2R:4512956:4513080:+@chr2R:4513133:4513793:+.B.dn'	(0,0):13,(0,1):153,(1,0):15,(1,1):677	0:44,1:801	(0,0):12,(0,1):85,(1,0):108,(1,1):448	0:285,1:356	chr2R	+	45129564512956	45137934513793
55	SclA, SclB	chr2L:16840165:16840208:+@chr2L:16840270:16840578:+	ri	0.03	0.02	0.04	0.38	0.35	0.42	-0.35	1000000000000	'chr2L:16840165:16840208:+@chr2L:16840270:16840578:+.A.withRI','chr2L:16840165:16840208:+@chr2L:16840270:16840578:+.B.up_chr2L:16840165:16840208:+@chr2L:16840270:16840578:+.B.dn'	(0,0):813,(0,1):191,(1,0):14,(1,1):695	0:30,1:870	(0,0):2582,(0,1):211,(1,0):482,(1,1):2102	0:1328,1:1467	chr2L	+	1684016516840160	1684057816840570
56	CG34179, slmo, CG12393	chr2L:6048134:6048418:-@chr2L:6046654:6047780:-	ri	0.27	0.23	0.31	0.62	0.58	0.67	-0.35	1000000000000	'chr2L:6048134:6048418:-@chr2L:6046654:6047780:-.A.withRI','chr2L:6048134:6048418:-@chr2L:6046654:6047780:-.B.dn_chr2L:6048134:6048418:-@chr2L:6046654:6047780:-.B.up'	(0,0):190,(0,1):3,(1,0):184,(1,1):2367	0:854,1:1700	(0,0):307,(0,1):6,(1,0):796,(1,1):4396	0:3466,1:1732	chr2L	-	60466546046654	60484186048418
57	DIP1	chrX:21499875:21500596:-@chrX:21499388:21499781:-	ri	0.32	0.24	0.41	0.67	0.59	0.75	-0.35	3.54349e+10	'chrX:21499875:21500596:-@chrX:21499388:21499781:-.A.withRI','chrX:21499875:21500596:-@chrX:21499388:21499781:-.B.dn_chrX:21499875:21500596:-@chrX:21499388:21499781:-.B.up'	(0,0):72,(0,1):23,(1,0):36,(1,1):405	0:132,1:332	(0,0):187,(0,1):18,(1,0):128,(1,1):851	0:654,1:343	chrX	-	2149938821499380	2150059621500590
58	Mtch	chr3L:184665:184669:+@chr3L:184775:185074:+	ri	0.64	0.51	0.79	0.99	0.98	1	-0.35	1.07378e+08	'chr3L:184665:184669:+@chr3L:184775:185074:+.A.withRI','chr3L:184665:184669:+@chr3L:184775:185074:+.B.up_chr3L:184665:184669:+@chr3L:184775:185074:+.B.dn'	(0,0):220,(1,0):140,(1,1):243	0:293,1:90	(0,0):403,(1,0):642,(1,1):268	0.631944	chr3L	+	184665184665	185074185074
59	Atg18a	chr3L:8182942:8183069:+@chr3L:8183151:8183537:+	ri	0.35	0.27	0.44	0.7	0.6	0.79	-0.35	2.41339e+07	'chr3L:8182942:8183069:+@chr3L:8183151:8183537:+.A.withRI','chr3L:8182942:8183069:+@chr3L:8183151:8183537:+.B.up_chr3L:8182942:8183069:+@chr3L:8183151:8183537:+.B.dn'	(0,0):100,(0,1):8,(1,0):49,(1,1):303	0:119,1:241	(0,0):57,(0,1):10,(1,0):100,(1,1):223	0:252,1:81	chr3L	+	81829428182942	81835378183537
60	ave, Rpn6	chr2R:10640298:10640415:-@chr2R:10639221:10639545:-	ri	0.63	0.57	0.7	0.97	0.92	1	-0.34	1000000000000	'chr2R:10640298:10640415:-@chr2R:10639221:10639545:-.A.withRI','chr2R:10640298:10640415:-@chr2R:10639221:10639545:-.B.dn_chr2R:10640298:10640415:-@chr2R:10639221:10639545:-.B.up'	(0,0):215,(0,1):9,(1,0):1005,(1,1):490	0:1328,1:176	(0,0):202,(0,1):1,(1,0):1011,(1,1):274	0:1279,1:7	chr2R	-	1063922110639220	1064041510640410
61	dUTPase	chr2L:11011335:11011379:+@chr2L:11011472:11012138:+	ri	0.51	0.46	0.56	0.85	0.8	0.9	-0.34	1000000000000	'chr2L:11011335:11011379:+@chr2L:11011472:11012138:+.A.withRI','chr2L:11011335:11011379:+@chr2L:11011472:11012138:+.B.up_chr2L:11011335:11011379:+@chr2L:11011472:11012138:+.B.dn'	(0,0):99,(0,1):111,(1,0):297,(1,1):1743	0:1160,1:991	(0,0):92,(0,1):22,(1,0):275,(1,1):814	0:999,1:112	chr2L	+	1101133511011330	1101213811012130
62	PlexA	chr4:1034944:1035152:-@chr4:1034259:1034394:-	ri	0.04	0.02	0.06	0.38	0.26	0.54	-0.34	1000000000000	'chr4:1034944:1035152:-@chr4:1034259:1034394:-.A.withRI','chr4:1034944:1035152:-@chr4:1034259:1034394:-.B.dn_chr4:1034944:1035152:-@chr4:1034259:1034394:-.B.up'	(0,0):68,(0,1):38,(1,0):18,(1,1):76	0:19,1:113	(0,0):75,(0,1):9,(1,0):57,(1,1):26	0:70,1:22	chr4	-	10342591034259	10351521035152
63	CG16700	chrX:16989446:16989597:+@chrX:16990318:16990678:+	ri	0.12	0.05	0.2	0.46	0.33	0.61	-0.34	806807	'chrX:16989446:16989597:+@chrX:16990318:16990678:+.A.withRI','chrX:16989446:16989597:+@chrX:16990318:16990678:+.B.up_chrX:16989446:16989597:+@chrX:16990318:16990678:+.B.dn'	(0,0):15,(0,1):11,(1,0):12,(1,1):32	0:17,1:38	(0,0):30,(0,1):12,(1,0):59,(1,1):27	0:74,1:24	chrX	+	1698944616989440	1699067816990670
64	Rbp1-like	chrX:13278333:13278990:-@chrX:13274660:13275076:-	ri	0.33	0.29	0.37	0.66	0.61	0.71	-0.33	1000000000000	'chrX:13278333:13278990:-@chrX:13274660:13275076:-.A.withRI','chrX:13278333:13278990:-@chrX:13274660:13275076:-.B.dn_chrX:13278333:13278990:-@chrX:13274660:13275076:-.B.up'	(0,0):46,(0,1):31,(1,0):452,(1,1):316	0:552,1:247	(0,0):116,(0,1):36,(1,0):1696,(1,1):572	0:2077,1:227	chrX	-	1327466013274660	1327899013278990
65	CG15445	chrX:20988189:20988431:+@chrX:20988486:20988642:+	ri	0.51	0.36	0.64	0.84	0.69	0.94	-0.33	27.14	'chrX:20988189:20988431:+@chrX:20988486:20988642:+.A.withRI','chrX:20988189:20988431:+@chrX:20988486:20988642:+.B.up_chrX:20988189:20988431:+@chrX:20988486:20988642:+.B.dn'	(0,0):53,(0,1):6,(1,0):36,(1,1):85	0:68,1:59	(0,0):49,(0,1):4,(1,0):43,(1,1):48	0:79,1:16	chrX	+	2098818920988180	2098864220988640
66	jvl	chr3R:10619443:10619610:+@chr3R:10620251:10620784:+	ri	0.29	0.23	0.37	0.61	0.53	0.7	-0.32	1000000000000	'chr3R:10619443:10619610:+@chr3R:10620251:10620784:+.A.withRI','chr3R:10619443:10619610:+@chr3R:10620251:10620784:+.B.up_chr3R:10619443:10619610:+@chr3R:10620251:10620784:+.B.dn'	(0,0):68,(0,1):31,(1,0):84,(1,1):152	0:143,1:124	(0,0):93,(0,1):28,(1,0):192,(1,1):122	0:263,1:79	chr3R	+	1061944310619440	1062078410620780
67	Lsd-1	chr3R:19589954:19590038:+@chr3R:19590108:19590406:+	ri	0.01	0.01	0.02	0.33	0.29	0.37	-0.32	1000000000000	'chr3R:19589954:19590038:+@chr3R:19590108:19590406:+.A.withRI','chr3R:19589954:19590038:+@chr3R:19590108:19590406:+.B.up_chr3R:19589954:19590038:+@chr3R:19590108:19590406:+.B.dn'	(0,0):330,(0,1):321,(1,0):13,(1,1):1108	0:29,1:1413	(0,0):143,(0,1):135,(1,0):208,(1,1):564	0:358,1:549	chr3R	+	1958995419589950	1959040619590400
68	Spf45	chr2L:22959877:22960833:-@chr2L:22959601:22959809:-	ri	0.62	0.49	0.74	0.94	0.87	0.98	-0.32	34395.9	'chr2L:22959877:22960833:-@chr2L:22959601:22959809:-.A.withRI','chr2L:22959877:22960833:-@chr2L:22959601:22959809:-.B.dn_chr2L:22959877:22960833:-@chr2L:22959601:22959809:-.B.up'	(0,0):120,(0,1):5,(1,0):58,(1,1):745	0:492,1:316	(0,0):121,(0,1):1,(1,0):108,(1,1):703	0:797,1:15	chr2L	-	2295960122959600	2296083322960830
69	Ge-1	chr2L:11100658:11100866:-@chr2L:11100294:11100574:-	ri	0.03	0.01	0.08	0.34	0.25	0.43	-0.31	1000000000000	'chr2L:11100658:11100866:-@chr2L:11100294:11100574:-.A.withRI','chr2L:11100658:11100866:-@chr2L:11100294:11100574:-.B.dn_chr2L:11100658:11100866:-@chr2L:11100294:11100574:-.B.up'	(0,0):10,(0,1):31,(1,0):1,(1,1):70	0:2,1:100	(0,0):22,(0,1):31,(1,0):37,(1,1):114	0:59,1:123	chr2L	-	1110029411100290	1110086611100860
70	CG6950	chr3R:7647629:7647833:-@chr3R:7647002:7647555:-	ri	0.07	0.03	0.12	0.38	0.31	0.45	-0.31	1000000000000	'chr3R:7647629:7647833:-@chr3R:7647002:7647555:-.A.withRI','chr3R:7647629:7647833:-@chr3R:7647002:7647555:-.B.dn_chr3R:7647629:7647833:-@chr3R:7647002:7647555:-.B.up'	(0,0):243,(0,1):4,(1,0):8,(1,1):722	0:45,1:689	(0,0):404,(0,1):7,(1,0):89,(1,1):1435	0:607,1:924	chr3R	-	76470027647002	76478337647833
71	CG33199, CG8229	chr2R:4838296:4838211|4837351:-@chr2R:4835938:4836446:-	a5ss	0.27	0.24	0.29	0.58	0.54	0.61	-0.31	1000000000000	'chr2R:4838296:4838211|4837351:-@chr2R:4835938:4836446:-.A.dn_chr2R:4838296:4838211|4837351:-@chr2R:4835938:4836446:-.A.coreAndExt','chr2R:4838296:4838211|4837351:-@chr2R:4835938:4836446:-.B.dn_chr2R:4838296:4838211|4837351:-@chr2R:4835938:4836446:-.B.core'	(0,0):595,(0,1):133,(1,0):644,(1,1):850	0:887,1:740	(0,0):1179,(0,1):121,(1,0):1511,(1,1):813	0:1964,1:481	chr2R	-	48359384835938	48382964838296
72	CG12375	chr2L:8126757:8126897:-@chr2L:8125630:8126698:-	ri	0.04	0.02	0.06	0.34	0.28	0.39	-0.3	1000000000000	'chr2L:8126757:8126897:-@chr2L:8125630:8126698:-.A.withRI','chr2L:8126757:8126897:-@chr2L:8125630:8126698:-.B.dn_chr2L:8126757:8126897:-@chr2L:8125630:8126698:-.B.up'	(0,0):56,(0,1):137,(1,0):12,(1,1):2103	0:77,1:2175	(0,0):49,(0,1):93,(1,0):110,(1,1):1821	0:720,1:1304	chr2L	-	81256308125630	81268978126897
73	Mf	chr3R:11001906:11002015:-@chr3R:10999859:11000065:-	ri	0.47	0.44	0.49	0.77	0.75	0.79	-0.3	1000000000000	'chr3R:11001906:11002015:-@chr3R:10999859:11000065:-.A.withRI','chr3R:11001906:11002015:-@chr3R:10999859:11000065:-.B.dn_chr3R:11001906:11002015:-@chr3R:10999859:11000065:-.B.up'	(0,0):1697,(0,1):366,(1,0):6628,(1,1):206	0:6723,1:477	(0,0):3307,(0,1):308,(1,0):18837,(1,1):229	0:19002,1:372	chr3R	-	1099985910999850	1100201511002010
74	CG32640, Lgr4	chrX:13071986:13072080:+@chrX:13072134:13072716:+	ri	0.54	0.46	0.62	0.84	0.8	0.88	-0.3	1000000000000	'chrX:13071986:13072080:+@chrX:13072134:13072716:+.A.withRI','chrX:13071986:13072080:+@chrX:13072134:13072716:+.B.up_chrX:13071986:13072080:+@chrX:13072134:13072716:+.B.dn'	(0,0):2,(0,1):37,(1,0):95,(1,1):796	0:520,1:408	(0,0):2,(0,1):49,(1,0):347,(1,1):554	0:794,1:156	chrX	+	1307198613071980	1307271613072710
75	CG7115	chr2L:7821534:7821642:+@chr2L:7822642:7823100:+	ri	0.24	0.18	0.31	0.54	0.4	0.7	-0.3	80.18	'chr2L:7821534:7821642:+@chr2L:7822642:7823100:+.A.withRI','chr2L:7821534:7821642:+@chr2L:7822642:7823100:+.B.up_chr2L:7821534:7821642:+@chr2L:7822642:7823100:+.B.dn'	(0,0):78,(0,1):6,(1,0):79,(1,1):116	0:113,1:88	(0,0):92,(0,1):2,(1,0):102,(1,1):69	0:146,1:27	chr2L	+	78215347821534	78231007823100
76	Herp	chr2L:7799846:7799833|7799309:-@chr2L:7798163:7798623:-	a5ss	0.68	0.61	0.75	0.98	0.94	1	-0.3	1000000000000	'chr2L:7799846:7799833|7799309:-@chr2L:7798163:7798623:-.A.dn_chr2L:7799846:7799833|7799309:-@chr2L:7798163:7798623:-.A.coreAndExt','chr2L:7799846:7799833|7799309:-@chr2L:7798163:7798623:-.B.dn_chr2L:7799846:7799833|7799309:-@chr2L:7798163:7798623:-.B.core'	(0,0):158,(1,0):840,(1,1):660	0:1310,1:190	(0,0):216,(1,0):1109,(1,1):515	0:1619,1:5	chr2L	-	77981637798163	77998467799846
77	Rpn13	chr2R:9846710:9846903:-@chr2R:9846033:9846604:-	ri	0.35	0.32	0.39	0.64	0.6	0.67	-0.29	1000000000000	'chr2R:9846710:9846903:-@chr2R:9846033:9846604:-.A.withRI','chr2R:9846710:9846903:-@chr2R:9846033:9846604:-.B.dn_chr2R:9846710:9846903:-@chr2R:9846033:9846604:-.B.up'	(0,0):162,(0,1):214,(1,0):292,(1,1):1568	0:738,1:1336	(0,0):140,(0,1):168,(1,0):656,(1,1):1373	0:1479,1:718	chr2R	-	98460339846033	98469039846903
78	kermit	chr2R:4036813:4036940:-@chr2R:4034422:4035900:-	ri	0.24	0.2	0.29	0.53	0.48	0.58	-0.29	1000000000000	'chr2R:4036813:4036940:-@chr2R:4034422:4035900:-.A.withRI','chr2R:4036813:4036940:-@chr2R:4034422:4035900:-.B.dn_chr2R:4036813:4036940:-@chr2R:4034422:4035900:-.B.up'	(0,0):55,(0,1):16,(1,0):153,(1,1):925	0:362,1:732	(0,0):162,(1,0):541,(1,1):1596	0:1392,1:745	chr2R	-	40344224034422	40369404036940
79	PCB	chr2R:5748030:5748327:-@chr2R:5747875:5747957:-	ri	0.44	0.39	0.49	0.73	0.68	0.78	-0.29	1000000000000	'chr2R:5748030:5748327:-@chr2R:5747875:5747957:-.A.withRI','chr2R:5748030:5748327:-@chr2R:5747875:5747957:-.B.dn_chr2R:5748030:5748327:-@chr2R:5747875:5747957:-.B.up'	(0,0):368,(0,1):131,(1,0):248,(1,1):455	0:441,1:393	(0,0):676,(0,1):42,(1,0):350,(1,1):526	0:714,1:204	chr2R	-	57478755747875	57483275748327
80	CG10077	chr3L:6946873:6948269:-@chr3L:6944367:6944545:-	ri	0.46	0.43	0.49	0.75	0.71	0.78	-0.29	1000000000000	'chr3L:6946873:6948269:-@chr3L:6944367:6944545:-.A.withRI','chr3L:6946873:6948269:-@chr3L:6944367:6944545:-.B.dn_chr3L:6946873:6948269:-@chr3L:6944367:6944545:-.B.up'	(0,0):334,(0,1):82,(1,0):1516,(1,1):1723	0:2306,1:1015	(0,0):456,(0,1):89,(1,0):2493,(1,1):1431	0:3541,1:472	chr3L	-	69443676944367	69482696948269
81	Aats-gly	chr3L:15088282:15088285:+@chr3L:15088374:15090790:+	ri	0.09	0.04	0.15	0.38	0.31	0.45	-0.29	1000000000000	'chr3L:15088282:15088285:+@chr3L:15088374:15090790:+.A.withRI','chr3L:15088282:15088285:+@chr3L:15088374:15090790:+.B.up_chr3L:15088282:15088285:+@chr3L:15088374:15090790:+.B.dn'	(0,0):117,(0,1):8,(1,0):8,(1,1):2615	0:305,1:2326	(0,0):360,(0,1):20,(1,0):103,(1,1):6096	0:2331,1:3888	chr3L	+	1508828215088280	1509079015090790
82	TFAM, CG5412	chr3R:16402528:16402741:-@chr3R:16401868:16402446:-	ri	0.04	0.02	0.07	0.33	0.28	0.38	-0.29	1000000000000	'chr3R:16402528:16402741:-@chr3R:16401868:16402446:-.A.withRI','chr3R:16402528:16402741:-@chr3R:16401868:16402446:-.B.dn_chr3R:16402528:16402741:-@chr3R:16401868:16402446:-.B.up'	(0,0):91,(0,1):68,(1,0):7,(1,1):627	0:23,1:679	(0,0):105,(0,1):137,(1,0):146,(1,1):936	0:399,1:820	chr3R	-	1640186816401860	1640274116402740
83	Rm62	chr3R:1834278:1834282:-@chr3R:1833759:1834028:-	ri	0.03	0.02	0.03	0.32	0.3	0.35	-0.29	1000000000000	'chr3R:1834278:1834282:-@chr3R:1833759:1834028:-.A.withRI','chr3R:1834278:1834282:-@chr3R:1833759:1834028:-.B.dn_chr3R:1834278:1834282:-@chr3R:1833759:1834028:-.B.up'	(0,0):505,(1,0):60,(1,1):857	0:94,1:823	(0,0):811,(1,0):1161,(1,1):1345	0:1634,1:872	chr3R	-	18337591833759	18342821834282
84	Cyp4d1	chrX:2055614:2056232:-@chrX:2053658:2054281:-	ri	0.12	0.11	0.12	0.41	0.38	0.44	-0.29	1000000000000	'chrX:2055614:2056232:-@chrX:2053658:2054281:-.A.withRI','chrX:2055614:2056232:-@chrX:2053658:2054281:-.B.dn_chrX:2055614:2056232:-@chrX:2053658:2054281:-.B.up'	(0,0):1806,(0,1):1574,(1,0):2183,(1,1):11497	0:3491,1:11763	(0,0):474,(0,1):94,(1,0):909,(1,1):1483	0:1531,1:955	chrX	-	20536582053658	20562322056232
85	CG7115	chr2L:7821534:7821648:+@chr2L:7822642:7823100:+	ri	0.23	0.17	0.3	0.52	0.39	0.67	-0.29	1983.24	'chr2L:7821534:7821648:+@chr2L:7822642:7823100:+.A.withRI','chr2L:7821534:7821648:+@chr2L:7822642:7823100:+.B.up_chr2L:7821534:7821648:+@chr2L:7822642:7823100:+.B.dn'	(0,0):76,(0,1):8,(1,0):78,(1,1):117	0:111,1:92	(0,0):91,(0,1):3,(1,0):102,(1,1):69	0:138,1:36	chr2L	+	78215347821534	78231007823100
86	lola	chr2R:6419544:6419624:-@chr2R:6392364:6393578:-	ri	0.27	0.24	0.3	0.55	0.48	0.62	-0.28	1000000000000	'chr2R:6419544:6419624:-@chr2R:6392364:6393578:-.A.withRI','chr2R:6419544:6419624:-@chr2R:6392364:6393578:-.B.dn_chr2R:6419544:6419624:-@chr2R:6392364:6393578:-.B.up'	(0,0):387,(0,1):37,(1,0):2597,(1,1):360	0:2692,1:302	(0,0):364,(0,1):11,(1,0):2420,(1,1):164	0:2500,1:95	chr2R	-	63923646392364	64196246419624
87	CG32425	chr3L:20502734:20503060:+@chr3L:20503130:20503879:+	ri	0.05	0.03	0.08	0.33	0.27	0.38	-0.28	1000000000000	'chr3L:20502734:20503060:+@chr3L:20503130:20503879:+.A.withRI','chr3L:20502734:20503060:+@chr3L:20503130:20503879:+.B.up_chr3L:20502734:20503060:+@chr3L:20503130:20503879:+.B.dn'	(0,0):97,(0,1):126,(1,0):14,(1,1):1617	0:56,1:1701	(0,0):80,(0,1):125,(1,0):104,(1,1):1499	0:550,1:1178	chr3L	+	2050273420502730	2050387920503870
88	pst	chr3L:7351960:7352154:-@chr3L:7351791:7351880:-	ri	0.14	0.1	0.19	0.42	0.37	0.47	-0.28	1000000000000	'chr3L:7351960:7352154:-@chr3L:7351791:7351880:-.A.withRI','chr3L:7351960:7352154:-@chr3L:7351791:7351880:-.B.dn_chr3L:7351960:7352154:-@chr3L:7351791:7351880:-.B.up'	(0,0):456,(1,0):38,(1,1):262	0:68,1:232	(0,0):627,(0,1):2,(1,0):238,(1,1):450	0:379,1:311	chr3L	-	73517917351791	73521547352154
89	CG32425	chr3L:20503132:20503879:+@chr3L:20505037:20505485:+	ri	0.38	0.34	0.41	0.66	0.61	0.71	-0.28	1000000000000	'chr3L:20503132:20503879:+@chr3L:20505037:20505485:+.A.withRI','chr3L:20503132:20503879:+@chr3L:20505037:20505485:+.B.up_chr3L:20503132:20503879:+@chr3L:20505037:20505485:+.B.dn'	(0,0):228,(0,1):12,(1,0):742,(1,1):1679	0:1438,1:995	(0,0):236,(0,1):21,(1,0):1278,(1,1):1577	0:2334,1:542	chr3L	+	2050313220503130	2050548520505480
90	AkhR	chr2L:6712347:6712675:-@chr2L:6711341:6711742:-	ri	0.08	0.06	0.11	0.36	0.29	0.45	-0.28	1000000000000	'chr2L:6712347:6712675:-@chr2L:6711341:6711742:-.A.withRI','chr2L:6712347:6712675:-@chr2L:6711341:6711742:-.B.dn_chr2L:6712347:6712675:-@chr2L:6711341:6711742:-.B.up'	(0,0):102,(0,1):89,(1,0):41,(1,1):266	0:58,1:338	(0,0):45,(0,1):34,(1,0):89,(1,1):126	0:133,1:116	chr2L	-	67113416711341	67126756712675
91	Ref1	chr3R:2905686:2906192:-@chr3R:2904976:2905177:-	ri	0.09	0.08	0.1	0.37	0.34	0.39	-0.28	1000000000000	'chr3R:2905686:2906192:-@chr3R:2904976:2905177:-.A.withRI','chr3R:2905686:2906192:-@chr3R:2904976:2905177:-.B.dn_chr3R:2905686:2906192:-@chr3R:2904976:2905177:-.B.up'	(0,0):112,(0,1):409,(1,0):181,(1,1):1117	0:287,1:1420	(0,0):116,(0,1):380,(1,0):1008,(1,1):1610	0:1581,1:1417	chr3R	-	29049762904976	29061922906192
92	REG	chrX:13106389:13106425:+@chrX:13106483:13106991:+	ri	0.13	0.09	0.19	0.41	0.35	0.48	-0.28	1000000000000	'chrX:13106389:13106425:+@chrX:13106483:13106991:+.A.withRI','chrX:13106389:13106425:+@chrX:13106483:13106991:+.B.up_chrX:13106389:13106425:+@chrX:13106483:13106991:+.B.dn'	(0,0):365,(0,1):9,(1,0):28,(1,1):1234	0:162,1:1109	(0,0):585,(0,1):12,(1,0):148,(1,1):2127	0:981,1:1306	chrX	+	1310638913106380	1310699113106990
93	Cul4	chr2R:3990113:3990411:-@chr2R:3989765:3990049:-	ri	0.55	0.42	0.69	0.83	0.74	0.91	-0.28	35.13	'chr2R:3990113:3990411:-@chr2R:3989765:3990049:-.A.withRI','chr2R:3990113:3990411:-@chr2R:3989765:3990049:-.B.dn_chr2R:3990113:3990411:-@chr2R:3989765:3990049:-.B.up'	(0,0):32,(0,1):12,(1,0):37,(1,1):115	0:96,1:68	(0,0):67,(0,1):9,(1,0):106,(1,1):237	0:275,1:77	chr2R	-	39897653989765	39904113990411
94	CG7394	chr3L:11555837:11555837:+@chr3L:11555961:11556200:+	ri	0.06	0.04	0.09	0.33	0.27	0.41	-0.27	1000000000000	'chr3L:11555837:11555837:+@chr3L:11555961:11556200:+.A.withRI','chr3L:11555837:11555837:+@chr3L:11555961:11556200:+.B.up_chr3L:11555837:11555837:+@chr3L:11555961:11556200:+.B.dn'	(0,0):225,(0,1):2,(1,0):20,(1,1):206	0:34,1:194	(0,0):367,(0,1):4,(1,0):123,(1,1):217	0:217,1:127	chr3L	+	1155583711555830	1155620011556200
95	Su(var)205	chr2L:8210979:8211237:-@chr2L:8210730:8210861:-	ri	0.12	0.1	0.15	0.39	0.35	0.43	-0.27	1000000000000	'chr2L:8210979:8211237:-@chr2L:8210730:8210861:-.A.withRI','chr2L:8210979:8211237:-@chr2L:8210730:8210861:-.B.dn_chr2L:8210979:8211237:-@chr2L:8210730:8210861:-.B.up'	(0,0):278,(0,1):200,(1,0):75,(1,1):239	0:91,1:423	(0,0):193,(0,1):155,(1,0):246,(1,1):148	0:278,1:271	chr2L	-	82107308210730	82112378211237
96	Hmt-1	chr3R:11683052:11683218:-@chr3R:11682360:11682675:-	ri	0.05	0.03	0.07	0.32	0.27	0.37	-0.27	1000000000000	'chr3R:11683052:11683218:-@chr3R:11682360:11682675:-.A.withRI','chr3R:11683052:11683218:-@chr3R:11682360:11682675:-.B.dn_chr3R:11683052:11683218:-@chr3R:11682360:11682675:-.B.up'	(0,0):53,(0,1):98,(1,0):15,(1,1):85	0:18,1:180	(0,0):68,(0,1):110,(1,0):168,(1,1):122	0:207,1:193	chr3R	-	1168236011682360	1168321811683210
97	Rm62	chr3R:1834273:1834276:-@chr3R:1833759:1834031:-	ri	0.03	0.02	0.03	0.3	0.28	0.33	-0.27	1000000000000	'chr3R:1834273:1834276:-@chr3R:1833759:1834031:-.A.withRI','chr3R:1834273:1834276:-@chr3R:1833759:1834031:-.B.dn_chr3R:1834273:1834276:-@chr3R:1833759:1834031:-.B.up'	(0,0):499,(0,1):6,(1,0):59,(1,1):858	0:73,1:850	(0,0):888,(0,1):9,(1,0):1065,(1,1):1352	0:1465,1:961	chr3R	-	18337591833759	18342761834276
98	CG6950	chr3R:7647629:7647833:-@chr3R:7647002:7647541:-	ri	0.05	0.02	0.08	0.32	0.27	0.38	-0.27	1000000000000	'chr3R:7647629:7647833:-@chr3R:7647002:7647541:-.A.withRI','chr3R:7647629:7647833:-@chr3R:7647002:7647541:-.B.dn_chr3R:7647629:7647833:-@chr3R:7647002:7647541:-.B.up'	(0,0):202,(0,1):45,(1,0):9,(1,1):721	0:38,1:737	(0,0):368,(0,1):43,(1,0):107,(1,1):1417	0:485,1:1082	chr3R	-	76470027647002	76478337647833
99	CG18659	chr2R:5014532:5014667:-@chr2R:5013056:5013571:-	ri	0.12	0.08	0.17	0.39	0.29	0.51	-0.27	8.48103e+08	'chr2R:5014532:5014667:-@chr2R:5013056:5013571:-.A.withRI','chr2R:5014532:5014667:-@chr2R:5013056:5013571:-.B.dn_chr2R:5014532:5014667:-@chr2R:5013056:5013571:-.B.up'	(0,0):46,(1,0):29,(1,1):117	0:40,1:106	(0,0):45,(0,1):5,(1,0):79,(1,1):87	0:116,1:55	chr2R	-	50130565013056	50146675014667
100	CG7115	chr2L:7821534:7821648:+@chr2L:7822676:7823100:+	ri	0.26	0.19	0.34	0.53	0.38	0.68	-0.27	17.87	'chr2L:7821534:7821648:+@chr2L:7822676:7823100:+.A.withRI','chr2L:7821534:7821648:+@chr2L:7822676:7823100:+.B.up_chr2L:7821534:7821648:+@chr2L:7822676:7823100:+.B.dn'	(0,0):80,(0,1):4,(1,0):88,(1,1):107	0:123,1:76	(0,0):92,(0,1):2,(1,0):107,(1,1):64	0:135,1:38	chr2L	+	78215347821534	78231007823100
101	CG33199, CG8229	chr2R:4838211:4838296:-@chr2R:4835938:4836446:-	ri	0.2	0.18	0.21	0.46	0.43	0.49	-0.26	1000000000000	'chr2R:4838211:4838296:-@chr2R:4835938:4836446:-.A.withRI','chr2R:4838211:4838296:-@chr2R:4835938:4836446:-.B.dn_chr2R:4838211:4838296:-@chr2R:4835938:4836446:-.B.up'	(0,0):318,(0,1):133,(1,0):921,(1,1):850	0:1097,1:807	(0,0):502,(0,1):121,(1,0):2188,(1,1):813	0:2537,1:585	chr2R	-	48359384835938	48382964838296
102	Mtch	chr3L:184665:184728:+@chr3L:185367:185739:+	ri	0.61	0.55	0.68	0.87	0.8	0.94	-0.26	11190.6	'chr3L:184665:184728:+@chr3L:185367:185739:+.A.withRI','chr3L:184665:184728:+@chr3L:185367:185739:+.B.up_chr3L:184665:184728:+@chr3L:185367:185739:+.B.dn'	(0,0):719,(1,0):845,(1,1):519	0:1202,1:162	(0,0):1300,(0,1):1,(1,0):1377,(1,1):597	0:1874,1:101	chr3L	+	184665184665	185739185739
103	CG6145	chr2R:9434020:9434521:-@chr2R:9429666:9430068:-@chr2R:9426477:9426854:-	se	0.59	0.5	0.68	0.85	0.8	0.89	-0.26	9.24972e+07	'chr2R:9434020:9434521:-@chr2R:9429666:9430068:-@chr2R:9426477:9426854:-.A.dn_chr2R:9434020:9434521:-@chr2R:9429666:9430068:-@chr2R:9426477:9426854:-.A.se_chr2R:9434020:9434521:-@chr2R:9429666:9430068:-@chr2R:9426477:9426854:-.A.up','chr2R:9434020:9434521:-@chr2R:9429666:9430068:-@chr2R:9426477:9426854:-.B.dn_chr2R:9434020:9434521:-@chr2R:9429666:9430068:-@chr2R:9426477:9426854:-.B.up'	(0,0):259,(0,1):24,(1,0):114,(1,1):171	0:197,1:112	(0,0):839,(0,1):28,(1,0):439,(1,1):369	0:745,1:91	chr2R	-	94264779426477	94345219434521
104	CG13319	chr2R:8811372:8811852:+@chr2R:8811927:8812157:+	ri	0.05	0.03	0.09	0.3	0.25	0.35	-0.25	1000000000000	'chr2R:8811372:8811852:+@chr2R:8811927:8812157:+.A.withRI','chr2R:8811372:8811852:+@chr2R:8811927:8812157:+.B.up_chr2R:8811372:8811852:+@chr2R:8811927:8812157:+.B.dn'	(0,0):23,(0,1):81,(1,0):8,(1,1):396	0:35,1:450	(0,0):45,(0,1):111,(1,0):99,(1,1):609	0:277,1:542	chr2R	+	88113728811372	88121578812157
105	UQCR-6.4	chr2R:13460241:13460280:-@chr2R:13459773:13460028:-	ri	0.75	0.67	0.83	1	0.99	1	-0.25	1000000000000	'chr2R:13460241:13460280:-@chr2R:13459773:13460028:-.A.withRI','chr2R:13460241:13460280:-@chr2R:13459773:13460028:-.B.dn_chr2R:13460241:13460280:-@chr2R:13459773:13460028:-.B.up'	(0,0):1028,(1,0):821,(1,1):544	0:1202,1:163	(0,0):1941,(1,0):2382,(1,1):616	2.08194	chr2R	-	1345977313459770	1346028013460280
106	Rm62	chr3R:1834273:1834276:-@chr3R:1833759:1834028:-	ri	0.02	0.02	0.03	0.27	0.25	0.29	-0.25	1000000000000	'chr3R:1834273:1834276:-@chr3R:1833759:1834028:-.A.withRI','chr3R:1834273:1834276:-@chr3R:1833759:1834028:-.B.dn_chr3R:1834273:1834276:-@chr3R:1833759:1834028:-.B.up'	(0,0):429,(0,1):76,(1,0):60,(1,1):857	0:92,1:901	(0,0):822,(0,1):75,(1,0):1072,(1,1):1345	0:1451,1:1041	chr3R	-	18337591833759	18342761834276
107	MSBP	chrX:15784028:15784161:-@chrX:15783335:15783765:-	ri	0.17	0.15	0.2	0.42	0.38	0.46	-0.25	1000000000000	'chrX:15784028:15784161:-@chrX:15783335:15783765:-.A.withRI','chrX:15784028:15784161:-@chrX:15783335:15783765:-.B.dn_chrX:15784028:15784161:-@chrX:15783335:15783765:-.B.up'	(0,0):1021,(0,1):102,(1,0):290,(1,1):2046	0:636,1:1802	(0,0):729,(0,1):67,(1,0):492,(1,1):1408	0:1069,1:898	chrX	-	1578333515783330	1578416115784160
108	CG13364	chrX:519199:519335:-@chrX:518735:519138:-	ri	0.12	0.1	0.14	0.37	0.35	0.4	-0.25	1000000000000	'chrX:519199:519335:-@chrX:518735:519138:-.A.withRI','chrX:519199:519335:-@chrX:518735:519138:-.B.dn_chrX:519199:519335:-@chrX:518735:519138:-.B.up'	(0,0):4,(0,1):445,(1,0):107,(1,1):1802	0:326,1:2028	(0,0):10,(0,1):672,(1,0):653,(1,1):2905	0:1689,1:2541	chrX	-	518735518735	519335519335
109	CG17746	chr3L:3239242:3239391:-@chr3L:3238612:3238982:-	ri	0.14	0.08	0.21	0.39	0.31	0.49	-0.25	983840	'chr3L:3239242:3239391:-@chr3L:3238612:3238982:-.A.withRI','chr3L:3239242:3239391:-@chr3L:3238612:3238982:-.B.dn_chr3L:3239242:3239391:-@chr3L:3238612:3238982:-.B.up'	(0,0):82,(0,1):3,(1,0):20,(1,1):176	0:44,1:155	(0,0):148,(0,1):5,(1,0):83,(1,1):256	0:183,1:161	chr3L	-	32386123238612	32393913239391
110	Mtch	chr3L:184665:185307|184728:+@chr3L:185367:185739:+	a5ss	0.68	0.61	0.76	0.93	0.85	0.98	-0.25	106082	'chr3L:184665:185307|184728:+@chr3L:185367:185739:+.A.coreAndExt_chr3L:184665:185307|184728:+@chr3L:185367:185739:+.A.dn','chr3L:184665:185307|184728:+@chr3L:185367:185739:+.B.core_chr3L:184665:185307|184728:+@chr3L:185367:185739:+.B.dn'	(0,0):714,(1,0):850,(1,1):519	0:1227,1:142	(0,0):1301,(0,1):1,(1,0):1376,(1,1):597	0:1930,1:44	chr3L	+	184665184665	185739185739
111	EloC	chr2R:15333723:15333794:-@chr2R:15333433:15333644:-	ri	0.22	0.18	0.27	0.46	0.4	0.53	-0.24	1000000000000	'chr2R:15333723:15333794:-@chr2R:15333433:15333644:-.A.withRI','chr2R:15333723:15333794:-@chr2R:15333433:15333644:-.B.dn_chr2R:15333723:15333794:-@chr2R:15333433:15333644:-.B.up'	(0,0):129,(0,1):105,(1,0):95,(1,1):254	0:168,1:286	(0,0):86,(0,1):72,(1,0):197,(1,1):247	0:317,1:199	chr2R	-	1533343315333430	1533379415333790
112	CG12034	chr3L:3219092:3219344:+@chr3L:3219431:3220938:+	ri	0.03	0.01	0.05	0.27	0.19	0.35	-0.24	1000000000000	'chr3L:3219092:3219344:+@chr3L:3219431:3220938:+.A.withRI','chr3L:3219092:3219344:+@chr3L:3219431:3220938:+.B.up_chr3L:3219092:3219344:+@chr3L:3219431:3220938:+.B.dn'	(0,0):23,(0,1):102,(1,0):6,(1,1):1595	0:28,1:1675	(0,0):20,(0,1):34,(1,0):36,(1,1):1064	0:339,1:795	chr3L	+	32190923219092	32209383220938
113	CG13784	chr2L:7219860:7220029:-@chr2L:7218909:7219130:-	ri	0.68	0.59	0.78	0.92	0.87	0.95	-0.24	2.22128e+06	'chr2L:7219860:7220029:-@chr2L:7218909:7219130:-.A.withRI','chr2L:7219860:7220029:-@chr2L:7218909:7219130:-.B.dn_chr2L:7219860:7220029:-@chr2L:7218909:7219130:-.B.up'	(0,0):18,(0,1):18,(1,0):255,(1,1):29	0:273,1:29	(0,0):35,(0,1):13,(1,0):877,(1,1):46	0:922,1:14	chr2L	-	72189097218909	72200297220029
114	Art3	chr3R:11054966:11055103:-@chr3R:11053327:11054901:-	ri	0.06	0.02	0.13	0.3	0.19	0.42	-0.24	45.26	'chr3R:11054966:11055103:-@chr3R:11053327:11054901:-.A.withRI','chr3R:11054966:11055103:-@chr3R:11053327:11054901:-.B.dn_chr3R:11054966:11055103:-@chr3R:11053327:11054901:-.B.up'	(0,0):15,(0,1):28,(1,0):4,(1,1):598	0:45,1:585	(0,0):17,(0,1):20,(1,0):18,(1,1):441	0:221,1:258	chr3R	-	1105332711053320	1105510311055100
115	Mtch	chr3L:184665:184681:+@chr3L:184775:185074:+	ri	0.76	0.62	0.92	1	0.98	1	-0.24	28.7	'chr3L:184665:184681:+@chr3L:184775:185074:+.A.withRI','chr3L:184665:184681:+@chr3L:184775:185074:+.B.up_chr3L:184665:184681:+@chr3L:184775:185074:+.B.dn'	(0,0):220,(1,0):140,(1,1):243	0:329,1:54	(0,0):403,(1,0):642,(1,1):268	0.631944	chr3L	+	184665184665	185074185074
116	AkhR	chr2L:6712338:6712675:-@chr2L:6711341:6711742:-	ri	0.08	0.05	0.1	0.31	0.25	0.38	-0.23	1000000000000	'chr2L:6712338:6712675:-@chr2L:6711341:6711742:-.A.withRI','chr2L:6712338:6712675:-@chr2L:6711341:6711742:-.B.dn_chr2L:6712338:6712675:-@chr2L:6711341:6711742:-.B.up'	(0,0):80,(0,1):111,(1,0):40,(1,1):267	0:60,1:358	(0,0):30,(0,1):49,(1,0):88,(1,1):127	0:132,1:132	chr2L	-	67113416711341	67126756712675
117	Spase25	chrX:11379594:11380198:+@chrX:11380269:11380509:+	ri	0.75	0.69	0.81	0.98	0.95	0.99	-0.23	1000000000000	'chrX:11379594:11380198:+@chrX:11380269:11380509:+.A.withRI','chrX:11379594:11380198:+@chrX:11380269:11380509:+.B.up_chrX:11379594:11380198:+@chrX:11380269:11380509:+.B.dn'	(0,0):418,(0,1):22,(1,0):347,(1,1):3080	0:2722,1:727	(0,0):280,(0,1):4,(1,0):513,(1,1):2382	0:2831,1:68	chrX	+	1137959411379590	1138050911380500
118	CG11073	chr2R:17986487:17987019:-@chr2R:17979647:17980222:-	ri	0.34	0.26	0.44	0.57	0.51	0.63	-0.23	387.05	'chr2R:17986487:17987019:-@chr2R:17979647:17980222:-.A.withRI','chr2R:17986487:17987019:-@chr2R:17979647:17980222:-.B.dn_chr2R:17986487:17987019:-@chr2R:17979647:17980222:-.B.up'	(0,0):44,(1,0):157,(1,1):69	0:182,1:44	(0,0):201,(1,0):1501,(1,1):387	0:1736,1:152	chr2R	-	1797964717979640	1798701917987010
119	CG8949	chrX:16971714:16971913:-@chrX:16970958:16971473:-	ri	0.17	0.1	0.26	0.4	0.33	0.49	-0.23	90.48	'chrX:16971714:16971913:-@chrX:16970958:16971473:-.A.withRI','chrX:16971714:16971913:-@chrX:16970958:16971473:-.B.dn_chrX:16971714:16971913:-@chrX:16970958:16971473:-.B.up'	(0,0):17,(0,1):35,(1,0):18,(1,1):106	0:37,1:122	(0,0):35,(0,1):45,(1,0):79,(1,1):188	0:160,1:152	chrX	-	1697095816970950	1697191316971910
120	Taf12	chr3R:7505289:7505397:-@chr3R:7504099:7504594:-	ri	0.58	0.48	0.69	0.81	0.71	0.92	-0.23	15.62	'chr3R:7505289:7505397:-@chr3R:7504099:7504594:-.A.withRI','chr3R:7505289:7505397:-@chr3R:7504099:7504594:-.B.dn_chr3R:7505289:7505397:-@chr3R:7504099:7504594:-.B.up'	(0,0):165,(1,0):244,(1,1):251	0:393,1:102	(0,0):192,(0,1):2,(1,0):323,(1,1):218	0:497,1:46	chr3R	-	75040997504099	75053977505397
121	dUTPase	chr2L:11011335:11011418|11011379:+@chr2L:11011472:11012138:+	a5ss	0.1	0.07	0.13	0.33	0.24	0.44	-0.23	8.70675e+06	'chr2L:11011335:11011418|11011379:+@chr2L:11011472:11012138:+.A.coreAndExt_chr2L:11011335:11011418|11011379:+@chr2L:11011472:11012138:+.A.dn','chr2L:11011335:11011418|11011379:+@chr2L:11011472:11012138:+.B.core_chr2L:11011335:11011418|11011379:+@chr2L:11011472:11012138:+.B.dn'	(0,0):371,(0,1):111,(1,0):25,(1,1):1743	0:224,1:1655	(0,0):336,(0,1):22,(1,0):31,(1,1):814	0:338,1:529	chr2L	+	1101133511011330	1101213811012130
122	DIP1	chrX:21501058:21501001|21499388:-@chrX:21497340:21497917:-	a5ss	0.54	0.48	0.61	0.77	0.69	0.85	-0.23	13024.2	'chrX:21501058:21501001|21499388:-@chrX:21497340:21497917:-.A.dn_chrX:21501058:21501001|21499388:-@chrX:21497340:21497917:-.A.coreAndExt','chrX:21501058:21501001|21499388:-@chrX:21497340:21497917:-.B.dn_chrX:21501058:21501001|21499388:-@chrX:21497340:21497917:-.B.core'	(0,0):176,(0,1):1,(1,0):697,(1,1):346	0:907,1:137	(0,0):318,(0,1):1,(1,0):1537,(1,1):551	0:1993,1:96	chrX	-	2149734021497340	2150105821501050
123	UbcE2M	chr3L:8190879:8190964:-@chr3L:8190622:8190802:-	ri	0.03	0.01	0.05	0.25	0.21	0.28	-0.22	1000000000000	'chr3L:8190879:8190964:-@chr3L:8190622:8190802:-.A.withRI','chr3L:8190879:8190964:-@chr3L:8190622:8190802:-.B.dn_chr3L:8190879:8190964:-@chr3L:8190622:8190802:-.B.up'	(0,0):123,(0,1):101,(1,0):10,(1,1):237	0:16,1:332	(0,0):182,(0,1):195,(1,0):193,(1,1):270	0:238,1:420	chr3L	-	81906228190622	81909648190964
124	MSBP	chrX:15784065:15784161:-@chrX:15783335:15783765:-	ri	0.15	0.13	0.17	0.37	0.33	0.41	-0.22	1000000000000	'chrX:15784065:15784161:-@chrX:15783335:15783765:-.A.withRI','chrX:15784065:15784161:-@chrX:15783335:15783765:-.B.dn_chrX:15784065:15784161:-@chrX:15783335:15783765:-.B.up'	(0,0):1057,(0,1):66,(1,0):294,(1,1):2042	0:570,1:1832	(0,0):760,(0,1):36,(1,0):497,(1,1):1403	0:968,1:968	chrX	-	1578333515783330	1578416115784160
125	mesh	chr3R:27006301:27006540:-@chr3R:27006181:27006231:-	ri	0.57	0.48	0.66	0.79	0.75	0.84	-0.22	449635	'chr3R:27006301:27006540:-@chr3R:27006181:27006231:-.A.withRI','chr3R:27006301:27006540:-@chr3R:27006181:27006231:-.B.dn_chr3R:27006301:27006540:-@chr3R:27006181:27006231:-.B.up'	(0,0):122,(0,1):33,(1,0):108,(1,1):95	0:166,1:70	(0,0):181,(0,1):53,(1,0):391,(1,1):106	0:476,1:74	chr3R	-	2700618127006180	2700654027006540
126	bic	chr2R:8757760:8757834:+@chr2R:8757908:8759608:+	ri	0.04	0.03	0.05	0.25	0.23	0.27	-0.21	1000000000000	'chr2R:8757760:8757834:+@chr2R:8757908:8759608:+.A.withRI','chr2R:8757760:8757834:+@chr2R:8757908:8759608:+.B.up_chr2R:8757760:8757834:+@chr2R:8757908:8759608:+.B.dn'	(0,0):1824,(0,1):64,(1,0):53,(1,1):18568	0:766,1:17919	(0,0):3463,(0,1):132,(1,0):788,(1,1):40779	0:11058,1:30641	chr2R	+	87577608757760	87596088759608
127	CG33995, CG44001	chr2L:5047273:5047479:+@chr2L:5047543:5048366:+	ri	0.03	0.01	0.04	0.24	0.21	0.27	-0.21	1000000000000	'chr2L:5047273:5047479:+@chr2L:5047543:5048366:+.A.withRI','chr2L:5047273:5047479:+@chr2L:5047543:5048366:+.B.up_chr2L:5047273:5047479:+@chr2L:5047543:5048366:+.B.dn'	(0,0):123,(0,1):227,(1,0):11,(1,1):1661	0:36,1:1863	(0,0):177,(0,1):317,(1,0):196,(1,1):2503	0:719,1:2297	chr2L	+	50472735047273	50483665048366
128	sgg	chrX:2567208:2568954|2567651:+@chrX:2571134:2571198:+	a5ss	0.16	0.13	0.19	0.37	0.32	0.42	-0.21	1000000000000	'chrX:2567208:2568954|2567651:+@chrX:2571134:2571198:+.A.coreAndExt_chrX:2567208:2568954|2567651:+@chrX:2571134:2571198:+.A.dn','chrX:2567208:2568954|2567651:+@chrX:2571134:2571198:+.B.core_chrX:2567208:2568954|2567651:+@chrX:2571134:2571198:+.B.dn'	(0,0):1356,(0,1):3,(1,0):183,(1,1):278	0:227,1:237	(0,0):2443,(0,1):9,(1,0):448,(1,1):282	0:559,1:180	chrX	+	25672082567208	25711982571198
129	Cchl	chr3R:17852882:17853155:-@chr3R:17852170:17852764:-	ri	0.38	0.31	0.47	0.58	0.53	0.63	-0.2	1966.23	'chr3R:17852882:17853155:-@chr3R:17852170:17852764:-.A.withRI','chr3R:17852882:17853155:-@chr3R:17852170:17852764:-.B.dn_chr3R:17852882:17853155:-@chr3R:17852170:17852764:-.B.up'	(0,0):193,(0,1):11,(1,0):78,(1,1):801	0:383,1:507	(0,0):451,(0,1):53,(1,0):398,(1,1):2543	0:1818,1:1176	chr3R	-	1785217017852170	1785315517853150
130	CG32425	chr3L:20502804:20502892:+@chr3L:20503130:20503879:+	ri	0.06	0.04	0.08	0.25	0.2	0.29	-0.19	1000000000000	'chr3L:20502804:20502892:+@chr3L:20503130:20503879:+.A.withRI','chr3L:20502804:20502892:+@chr3L:20503130:20503879:+.B.up_chr3L:20502804:20502892:+@chr3L:20503130:20503879:+.B.dn'	(0,0):223,(1,0):35,(1,1):1593	0:139,1:1489	(0,0):205,(1,0):133,(1,1):1468	0:532,1:1069	chr3L	+	2050280420502800	2050387920503870
131	Jafrac2	chr3L:3042352:3042450:+@chr3L:3043441:3043846:+	ri	0.19	0.17	0.23	0.38	0.32	0.45	-0.19	1000000000000	'chr3L:3042352:3042450:+@chr3L:3043441:3043846:+.A.withRI','chr3L:3042352:3042450:+@chr3L:3043441:3043846:+.B.up_chr3L:3042352:3042450:+@chr3L:3043441:3043846:+.B.dn'	(0,0):756,(1,0):272,(1,1):435	0:365,1:342	(0,0):565,(0,1):2,(1,0):303,(1,1):249	0:383,1:171	chr3L	+	30423523042352	30438463043846
132	CG32137	chr3L:13932353:13932558:+@chr3L:13934391:13934575:+	ri	0.24	0.2	0.29	0.43	0.37	0.5	-0.19	1.06783e+07	'chr3L:13932353:13932558:+@chr3L:13934391:13934575:+.A.withRI','chr3L:13932353:13932558:+@chr3L:13934391:13934575:+.B.up_chr3L:13932353:13932558:+@chr3L:13934391:13934575:+.B.dn'	(0,0):83,(0,1):38,(1,0):287,(1,1):71	0:305,1:91	(0,0):124,(0,1):47,(1,0):581,(1,1):57	0:609,1:76	chr3L	+	1393235313932350	1393457513934570
133	whd	chr2R:6365865:6366184:-@chr2R:6360774:6360955:-	ri	0.17	0.14	0.22	0.36	0.28	0.46	-0.19	217.34	'chr2R:6365865:6366184:-@chr2R:6360774:6360955:-.A.withRI','chr2R:6365865:6366184:-@chr2R:6360774:6360955:-.B.dn_chr2R:6365865:6366184:-@chr2R:6360774:6360955:-.B.up'	(0,0):317,(0,1):26,(1,0):235,(1,1):52	0:246,1:67	(0,0):290,(0,1):17,(1,0):355,(1,1):37	0:365,1:44	chr2R	-	63607746360774	63661846366184
134	BuGZ	chr2L:16744690:16745107:+@chr2L:16746227:16746616:+	ri	0.5	0.42	0.59	0.69	0.61	0.77	-0.19	16.01	'chr2L:16744690:16745107:+@chr2L:16746227:16746616:+.A.withRI','chr2L:16744690:16745107:+@chr2L:16746227:16746616:+.B.up_chr2L:16744690:16745107:+@chr2L:16746227:16746616:+.B.dn'	(0,0):28,(0,1):18,(1,0):193,(1,1):156	0:260,1:107	(0,0):75,(0,1):12,(1,0):441,(1,1):294	0:643,1:104	chr2L	+	1674469016744690	1674661616746610
135	Unc-89	chr2R:19898446:19898504:-@chr2R:19895357:19895668:-	ri	0.06	0.02	0.13	0.25	0.14	0.4	-0.19	13.88	'chr2R:19898446:19898504:-@chr2R:19895357:19895668:-.A.withRI','chr2R:19898446:19898504:-@chr2R:19895357:19895668:-.B.dn_chr2R:19898446:19898504:-@chr2R:19895357:19895668:-.B.up'	(0,0):28,(1,0):8,(1,1):14	0:9,1:13	(0,0):106,(0,1):2,(1,0):60,(1,1):15	0:64,1:13	chr2R	-	1989535719895350	1989850419898500
136	Gbeta13F	chrX:15754159:15754283:+@chrX:15755168|15755417:15755519:+	a3ss	0.15	0.12	0.19	0.33	0.27	0.38	-0.18	1.69085e+07	'chrX:15754159:15754283:+@chrX:15755168|15755417:15755519:+.A.up_chrX:15754159:15754283:+@chrX:15755168|15755417:15755519:+.A.coreAndExt','chrX:15754159:15754283:+@chrX:15755168|15755417:15755519:+.B.up_chrX:15754159:15754283:+@chrX:15755168|15755417:15755519:+.B.core'	(0,0):318,(0,1):80,(1,0):84,(1,1):17	0:85,1:96	(0,0):354,(0,1):80,(1,0):199,(1,1):6	0:201,1:84	chrX	+	1575415915754150	1575551915755510
137	CG32425	chr3L:20502804:20502875:+@chr3L:20503130:20503879:+	ri	0.06	0.04	0.07	0.23	0.19	0.27	-0.17	1000000000000	'chr3L:20502804:20502875:+@chr3L:20503130:20503879:+.A.withRI','chr3L:20502804:20502875:+@chr3L:20503130:20503879:+.B.up_chr3L:20502804:20502875:+@chr3L:20503130:20503879:+.B.dn'	(0,0):223,(1,0):35,(1,1):1593	0:112,1:1516	(0,0):204,(0,1):1,(1,0):133,(1,1):1468	0:468,1:1134	chr3L	+	2050280420502800	2050387920503870
138	Gs1	chr2L:132060:132255:+@chr2L:132483:133995:+	ri	0.08	0.07	0.09	0.25	0.24	0.27	-0.17	1000000000000	'chr2L:132060:132255:+@chr2L:132483:133995:+.A.withRI','chr2L:132060:132255:+@chr2L:132483:133995:+.B.up_chr2L:132060:132255:+@chr2L:132483:133995:+.B.dn'	(0,0):2050,(0,1):529,(1,0):214,(1,1):12815	0:1246,1:12312	(0,0):2935,(0,1):684,(1,0):975,(1,1):18736	0:5603,1:14792	chr2L	+	132060132060	133995133995
139	crc	chr2L:21311914:21312043:+@chr2L:21312098:21312208:+	ri	0.01	0.01	0.02	0.18	0.16	0.2	-0.17	1000000000000	'chr2L:21311914:21312043:+@chr2L:21312098:21312208:+.A.withRI','chr2L:21311914:21312043:+@chr2L:21312098:21312208:+.B.up_chr2L:21311914:21312043:+@chr2L:21312098:21312208:+.B.dn'	(0,0):1592,(0,1):794,(1,0):30,(1,1):851	0:40,1:1635	(0,0):1039,(0,1):622,(1,0):402,(1,1):764	0:477,1:1311	chr2L	+	2131191421311910	2131220821312200
140	ATPsynE	chr3R:10152746:10152910:+@chr3R:10152975:10153473:+	ri	0	0	0.01	0.17	0.15	0.19	-0.17	1000000000000	'chr3R:10152746:10152910:+@chr3R:10152975:10153473:+.A.withRI','chr3R:10152746:10152910:+@chr3R:10152975:10153473:+.B.up_chr3R:10152746:10152910:+@chr3R:10152975:10153473:+.B.dn'	(0,0):1465,(0,1):21,(1,0):2,(1,1):5680	0:16,1:5687	(0,0):2761,(0,1):67,(1,0):289,(1,1):10714	0:2174,1:8896	chr3R	+	1015274610152740	1015347310153470
141	VhaPPA1-1	chr3R:10729673:10729907:-@chr3R:10728934:10729613:-	ri	0.04	0.04	0.05	0.21	0.19	0.23	-0.17	1000000000000	'chr3R:10729673:10729907:-@chr3R:10728934:10729613:-.A.withRI','chr3R:10729673:10729907:-@chr3R:10728934:10729613:-.B.dn_chr3R:10729673:10729907:-@chr3R:10728934:10729613:-.B.up'	(0,0):629,(0,1):1161,(1,0):85,(1,1):5087	0:293,1:6040	(0,0):1180,(0,1):1095,(1,0):453,(1,1):5409	0:1640,1:5317	chr3R	-	1072893410728930	1072990710729900
142	par-1	chr2R:15347300:15348121:+@chr2R:15358102:15358317:+	ri	0.3	0.27	0.33	0.47	0.43	0.51	-0.17	1.20326e+07	'chr2R:15347300:15348121:+@chr2R:15358102:15358317:+.A.withRI','chr2R:15347300:15348121:+@chr2R:15358102:15358317:+.B.up_chr2R:15347300:15348121:+@chr2R:15358102:15358317:+.B.dn'	(0,0):320,(0,1):54,(1,0):1299,(1,1):285	0:1378,1:260	(0,0):535,(0,1):46,(1,0):2552,(1,1):370	0:2720,1:248	chr2R	+	1534730015347300	1535831715358310
143	CG14777	chrX:1360523:1360966:+@chrX:1361836:1361997:+	ri	0.11	0.07	0.16	0.28	0.21	0.36	-0.17	21.76	'chrX:1360523:1360966:+@chrX:1361836:1361997:+.A.withRI','chrX:1360523:1360966:+@chrX:1361836:1361997:+.B.up_chrX:1360523:1360966:+@chrX:1361836:1361997:+.B.dn'	(0,0):30,(0,1):47,(1,0):26,(1,1):38	0:28,1:83	(0,0):23,(0,1):32,(1,0):70,(1,1):54	0:85,1:71	chrX	+	13605231360523	13619971361997
144	ND-ACP	chr3L:1330131:1330290:+@chr3L:1330863:1330863:+@chr3L:1331042:1331042:+@chr3L:1331280:1331633:+	mxe	0.4	0.38	0.41	0.57	0.56	0.58	-0.17	1000000000000	'chr3L:1330131:1330290:+@chr3L:1330863:1330863:+@chr3L:1331042:1331042:+@chr3L:1331280:1331633:+.A.up_chr3L:1330131:1330290:+@chr3L:1330863:1330863:+@chr3L:1331042:1331042:+@chr3L:1331280:1331633:+.A.mxe1_chr3L:1330131:1330290:+@chr3L:1330863:1330863:+@chr3L:1331042:1331042:+@chr3L:1331280:1331633:+.A.dn','chr3L:1330131:1330290:+@chr3L:1330863:1330863:+@chr3L:1331042:1331042:+@chr3L:1331280:13316…	(0,0):971,(0,1):2070,(1,0):1176,(1,1):1806	0:1981,1:3071	(0,0):2109,(0,1):2800,(1,0):3257,(1,1):3532	0:5319,1:4270	chr3L	+	13301311330131	13316331331633
145	pAbp	chr2R:14028820:14028921:+@chr2R:14028993:14029177:+	ri	0	0	0.01	0.16	0.14	0.19	-0.16	1000000000000	'chr2R:14028820:14028921:+@chr2R:14028993:14029177:+.A.withRI','chr2R:14028820:14028921:+@chr2R:14028993:14029177:+.B.up_chr2R:14028820:14028921:+@chr2R:14028993:14029177:+.B.dn'	(0,0):1611,(0,1):261,(1,0):2,(1,1):933	0:8,1:1188	(0,0):1853,(0,1):241,(1,0):224,(1,1):1196	0:409,1:1252	chr2R	+	1402882014028820	1402917714029170
146	FER	chr3R:5219963:5220293:-@chr3R:5218463:5218694:-	ri	0.02	0.01	0.04	0.18	0.14	0.23	-0.16	1000000000000	'chr3R:5219963:5220293:-@chr3R:5218463:5218694:-.A.withRI','chr3R:5219963:5220293:-@chr3R:5218463:5218694:-.B.dn_chr3R:5219963:5220293:-@chr3R:5218463:5218694:-.B.up'	(0,0):5,(0,1):33,(1,0):5,(1,1):46	0:5,1:79	(0,0):15,(0,1):27,(1,0):77,(1,1):84	0:93,1:95	chr3R	-	52184635218463	52202935220293
147	Tm1	chr3R:11112196:11112286:+@chr3R:11113975:11115161:+	ri	0.13	0.11	0.16	0.29	0.27	0.33	-0.16	1000000000000	'chr3R:11112196:11112286:+@chr3R:11113975:11115161:+.A.withRI','chr3R:11112196:11112286:+@chr3R:11113975:11115161:+.B.up_chr3R:11112196:11112286:+@chr3R:11113975:11115161:+.B.dn'	(0,0):104,(0,1):3,(1,0):122,(1,1):598	0:184,1:539	(0,0):163,(0,1):5,(1,0):489,(1,1):1060	0:793,1:761	chr3R	+	1111219611112190	1111516111115160
148	CG33713, SLIRP1	chrX:21190250:21190299:-@chrX:21188961:21190167:-	ri	0.02	0.01	0.04	0.18	0.15	0.22	-0.16	1000000000000	'chrX:21190250:21190299:-@chrX:21188961:21190167:-.A.withRI','chrX:21190250:21190299:-@chrX:21188961:21190167:-.B.dn_chrX:21190250:21190299:-@chrX:21188961:21190167:-.B.up'	(0,0):91,(0,1):148,(1,0):6,(1,1):2251	0:30,1:2375	(0,0):205,(0,1):124,(1,0):88,(1,1):4195	0:910,1:3497	chrX	-	2118896121188960	2119029921190290
149	CG11791	chr3R:20875917:20876339:+@chr3R:20876903:20877278:+	ri	0.36	0.32	0.4	0.52	0.48	0.56	-0.16	1.74446e+10	'chr3R:20875917:20876339:+@chr3R:20876903:20877278:+.A.withRI','chr3R:20875917:20876339:+@chr3R:20876903:20877278:+.B.up_chr3R:20875917:20876339:+@chr3R:20876903:20877278:+.B.dn'	(0,0):153,(0,1):117,(1,0):325,(1,1):590	0:536,1:496	(0,0):113,(0,1):154,(1,0):621,(1,1):630	0:975,1:430	chr3R	+	2087591720875910	2087727820877270
150	PGRP-LC	chr3L:9334423:9334491:+@chr3L:9335265:9336229:+	ri	0.04	0.02	0.08	0.2	0.15	0.25	-0.16	4.9718e+06	'chr3L:9334423:9334491:+@chr3L:9335265:9336229:+.A.withRI','chr3L:9334423:9334491:+@chr3L:9335265:9336229:+.B.up_chr3L:9334423:9334491:+@chr3L:9335265:9336229:+.B.dn'	(0,0):33,(1,0):10,(1,1):272	0:28,1:254	(0,0):34,(0,1):1,(1,0):70,(1,1):392	0:144,1:319	chr3L	+	93344239334423	93362299336229
151	Tango11	chr2R:17607360:17607455:-@chr2R:17606586:17607188:-	ri	0.09	0.05	0.13	0.25	0.2	0.3	-0.16	4.13318e+06	'chr2R:17607360:17607455:-@chr2R:17606586:17607188:-.A.withRI','chr2R:17607360:17607455:-@chr2R:17606586:17607188:-.B.dn_chr2R:17607360:17607455:-@chr2R:17606586:17607188:-.B.up'	(0,0):55,(0,1):19,(1,0):21,(1,1):569	0:42,1:567	(0,0):105,(0,1):43,(1,0):86,(1,1):675	0:254,1:550	chr2R	-	1760658617606580	1760745517607450
152	CycG	chr3R:27436603:27436706:-@chr3R:27427945|27428795:27427138:-	a3ss	0.06	0.06	0.07	0.22	0.21	0.24	-0.16	1000000000000	'chr3R:27436603:27436706:-@chr3R:27427945|27428795:27427138:-.A.coreAndExt_chr3R:27436603:27436706:-@chr3R:27427945|27428795:27427138:-.A.up','chr3R:27436603:27436706:-@chr3R:27427945|27428795:27427138:-.B.core_chr3R:27436603:27436706:-@chr3R:27427945|27428795:27427138:-.B.up'	(0,0):2980,(0,1):182,(1,0):308,(1,1):3659	0:522,1:3627	(0,0):6622,(0,1):219,(1,0):1200,(1,1):4051	0:2117,1:3353	chr3R	-	2742713827427130	2743670627436700
153	Pdk1	chr3L:132702:132809:+@chr3L:135458:135842:+	ri	0.08	0.06	0.11	0.23	0.19	0.27	-0.15	1000000000000	'chr3L:132702:132809:+@chr3L:135458:135842:+.A.withRI','chr3L:132702:132809:+@chr3L:135458:135842:+.B.up_chr3L:132702:132809:+@chr3L:135458:135842:+.B.dn'	(0,0):39,(0,1):5,(1,0):65,(1,1):89	0:71,1:88	(0,0):107,(0,1):1,(1,0):302,(1,1):154	0:329,1:128	chr3L	+	132702132702	135842135842
154	PGRP-LC	chr3L:9333554:9333601:+@chr3L:9335265:9336229:+	ri	0.04	0.03	0.06	0.19	0.16	0.23	-0.15	1000000000000	'chr3L:9333554:9333601:+@chr3L:9335265:9336229:+.A.withRI','chr3L:9333554:9333601:+@chr3L:9335265:9336229:+.B.up_chr3L:9333554:9333601:+@chr3L:9335265:9336229:+.B.dn'	(0,0):51,(0,1):1,(1,0):22,(1,1):272	0:35,1:260	(0,0):54,(0,1):4,(1,0):152,(1,1):392	0:205,1:343	chr3L	+	93335549333554	93362299336229
155	PGRP-LC	chr3L:9333554:9333689:+@chr3L:9335265:9336229:+	ri	0.04	0.02	0.06	0.19	0.16	0.22	-0.15	1000000000000	'chr3L:9333554:9333689:+@chr3L:9335265:9336229:+.A.withRI','chr3L:9333554:9333689:+@chr3L:9335265:9336229:+.B.up_chr3L:9333554:9333689:+@chr3L:9335265:9336229:+.B.dn'	(0,0):13,(0,1):39,(1,0):21,(1,1):273	0:32,1:301	(0,0):26,(0,1):32,(1,0):148,(1,1):396	0:216,1:360	chr3L	+	93335549333554	93362299336229
156	CG6951, Clc	chr3L:20235590:20235767:+@chr3L:20235885:20236835:+	ri	0.01	0.01	0.01	0.16	0.14	0.17	-0.15	1000000000000	'chr3L:20235590:20235767:+@chr3L:20235885:20236835:+.A.withRI','chr3L:20235590:20235767:+@chr3L:20235885:20236835:+.B.up_chr3L:20235590:20235767:+@chr3L:20235885:20236835:+.B.dn'	(0,0):140,(0,1):639,(1,0):14,(1,1):4414	0:73,1:4994	(0,0):112,(0,1):493,(1,0):244,(1,1):5362	0:981,1:5118	chr3L	+	2023559020235590	2023683520236830
157	eIF-4a	chr2L:5985026:5985220:+@chr2L:5985339:5985559:+	ri	0.18	0.17	0.18	0.33	0.32	0.34	-0.15	1000000000000	'chr2L:5985026:5985220:+@chr2L:5985339:5985559:+.A.withRI','chr2L:5985026:5985220:+@chr2L:5985339:5985559:+.B.up_chr2L:5985026:5985220:+@chr2L:5985339:5985559:+.B.dn'	(0,0):2210,(0,1):3603,(1,0):2015,(1,1):5113	0:2633,1:8098	(0,0):4026,(0,1):7514,(1,0):8956,(1,1):10559	0:11681,1:15348	chr2L	+	59850265985026	59855595985559
158	hts	chr2R:15311549:15311585:-@chr2R:15311099:15311302:-	ri	0.06	0.04	0.09	0.21	0.15	0.26	-0.15	2.98847e+09	'chr2R:15311549:15311585:-@chr2R:15311099:15311302:-.A.withRI','chr2R:15311549:15311585:-@chr2R:15311099:15311302:-.B.dn_chr2R:15311549:15311585:-@chr2R:15311099:15311302:-.B.up'	(0,0):97,(0,1):25,(1,0):22,(1,1):76	0:28,1:95	(0,0):276,(0,1):25,(1,0):83,(1,1):78	0:101,1:85	chr2R	-	1531109915311090	1531158515311580
159	CG13124	chr2L:9907608:9907783:-@chr2L:9907051:9907544:-	ri	0.04	0.01	0.08	0.19	0.14	0.24	-0.15	6.42801e+07	'chr2L:9907608:9907783:-@chr2L:9907051:9907544:-.A.withRI','chr2L:9907608:9907783:-@chr2L:9907051:9907544:-.B.dn_chr2L:9907608:9907783:-@chr2L:9907051:9907544:-.B.up'	(0,0):128,(0,1):50,(1,0):3,(1,1):237	0:20,1:270	(0,0):316,(0,1):93,(1,0):45,(1,1):470	0:133,1:475	chr2L	-	99070519907051	99077839907783
160	Rap1	chr3L:1862304:1862178|1861930:-@chr3L:1859105:1861676:-	a5ss	0.2	0.16	0.26	0.35	0.3	0.4	-0.15	136.5	'chr3L:1862304:1862178|1861930:-@chr3L:1859105:1861676:-.A.dn_chr3L:1862304:1862178|1861930:-@chr3L:1859105:1861676:-.A.coreAndExt','chr3L:1862304:1862178|1861930:-@chr3L:1859105:1861676:-.B.dn_chr3L:1862304:1862178|1861930:-@chr3L:1859105:1861676:-.B.core'	(0,0):270,(0,1):1,(1,0):73,(1,1):3649	0:713,1:3010	(0,0):964,(0,1):4,(1,0):161,(1,1):4619	0:1690,1:3094	chr3L	-	18591051859105	18623041862304
161	par-1	chr2R:15347300:15348121:+@chr2R:15356295:15357843:+@chr2R:15358102:15358317:+	se	0.75	0.7	0.79	0.9	0.87	0.92	-0.15	5.21034e+07	'chr2R:15347300:15348121:+@chr2R:15356295:15357843:+@chr2R:15358102:15358317:+.A.up_chr2R:15347300:15348121:+@chr2R:15356295:15357843:+@chr2R:15358102:15358317:+.A.se_chr2R:15347300:15348121:+@chr2R:15356295:15357843:+@chr2R:15358102:15358317:+.A.dn','chr2R:15347300:15348121:+@chr2R:15356295:15357843:+@chr2R:15358102:15358317:+.B.up_chr2R:15347300:15348121:+@chr2R:15356295:15357843:+@chr2R:153581…	(0,0):774,(0,1):54,(1,0):845,(1,1):285	0:1067,1:117	(0,0):1316,(0,1):46,(1,0):1771,(1,1):370	0:2098,1:89	chr2R	+	1534730015347300	1535831715358310
162	Sod2	chr2R:12661369:12661399:-@chr2R:12660421:12661143:-	ri	0.28	0.24	0.31	0.42	0.39	0.45	-0.14	1000000000000	'chr2R:12661369:12661399:-@chr2R:12660421:12661143:-.A.withRI','chr2R:12661369:12661399:-@chr2R:12660421:12661143:-.B.dn_chr2R:12661369:12661399:-@chr2R:12660421:12661143:-.B.up'	(0,0):559,(1,0):260,(1,1):2335	0:880,1:1715	(0,0):2099,(1,0):1000,(1,1):5988	0:3492,1:3496	chr2R	-	1266042112660420	1266139912661390
163	Pdk1	chr3L:134028:134081:+@chr3L:135458:135842:+	ri	0.08	0.06	0.11	0.22	0.17	0.27	-0.14	1000000000000	'chr3L:134028:134081:+@chr3L:135458:135842:+.A.withRI','chr3L:134028:134081:+@chr3L:135458:135842:+.B.up_chr3L:134028:134081:+@chr3L:135458:135842:+.B.dn'	(0,0):34,(1,0):40,(1,1):89	0:47,1:82	(0,0):102,(1,0):183,(1,1):154	0:229,1:108	chr3L	+	134028134028	135842135842
164	ATPsynE	chr3R:10152746:10152905:+@chr3R:10152975:10153473:+	ri	0	0	0.01	0.14	0.12	0.16	-0.14	1000000000000	'chr3R:10152746:10152905:+@chr3R:10152975:10153473:+.A.withRI','chr3R:10152746:10152905:+@chr3R:10152975:10153473:+.B.up_chr3R:10152746:10152905:+@chr3R:10152975:10153473:+.B.dn'	(0,0):1385,(0,1):101,(1,0):2,(1,1):5680	0:12,1:5771	(0,0):2586,(0,1):242,(1,0):290,(1,1):10713	0:1688,1:9557	chr3R	+	1015274610152740	1015347310153470
165	CycG	chr3R:27435042:27435796:-@chr3R:27427138:27427952:-	ri	0.05	0.05	0.06	0.19	0.18	0.2	-0.14	1000000000000	'chr3R:27435042:27435796:-@chr3R:27427138:27427952:-.A.withRI','chr3R:27435042:27435796:-@chr3R:27427138:27427952:-.B.dn_chr3R:27435042:27435796:-@chr3R:27427138:27427952:-.B.up'	(0,0):813,(0,1):287,(1,0):1327,(1,1):4376	0:1574,1:4416	(0,0):1004,(0,1):279,(1,0):5277,(1,1):4954	0:6226,1:4284	chr3R	-	2742713827427130	2743579627435790
166	RpL15	chr3LHet:2397802:2398017:+@chr3LHet:2398128:2398454:+	ri	0.12	0.11	0.13	0.26	0.24	0.27	-0.14	1000000000000	'chr3LHet:2397802:2398017:+@chr3LHet:2398128:2398454:+.A.withRI','chr3LHet:2397802:2398017:+@chr3LHet:2398128:2398454:+.B.up_chr3LHet:2397802:2398017:+@chr3LHet:2398128:2398454:+.B.dn'	(0,0):4174,(0,1):14,(1,0):870,(1,1):22924	0:3708,1:20100	(0,0):2771,(0,1):44,(1,0):2189,(1,1):26964	0:8985,1:20212	chr3LHet	+	23978022397802	23984542398454
167	CG13124	chr2L:9907608:9907783:-@chr2L:9907051:9907547:-	ri	0.03	0.01	0.06	0.17	0.13	0.22	-0.14	3.5518e+11	'chr2L:9907608:9907783:-@chr2L:9907051:9907547:-.A.withRI','chr2L:9907608:9907783:-@chr2L:9907051:9907547:-.B.dn_chr2L:9907608:9907783:-@chr2L:9907051:9907547:-.B.up'	(0,0):133,(0,1):45,(1,0):2,(1,1):238	0:11,1:274	(0,0):300,(0,1):109,(1,0):43,(1,1):472	0:122,1:502	chr2L	-	99070519907051	99077839907783
168	Rab10, CG17068	chrX:20122414:20122831:+@chrX:20123582:20123671:+	ri	0.23	0.19	0.27	0.37	0.32	0.43	-0.14	10658.3	'chrX:20122414:20122831:+@chrX:20123582:20123671:+.A.withRI','chrX:20122414:20122831:+@chrX:20123582:20123671:+.B.up_chrX:20122414:20122831:+@chrX:20123582:20123671:+.B.dn'	(0,0):463,(0,1):3,(1,0):210,(1,1):383	0:295,1:301	(0,0):518,(0,1):10,(1,0):352,(1,1):380	0:494,1:248	chrX	+	2012241420122410	2012367120123670
169	CG6950	chr3R:7647698:7647833:-@chr3R:7647002:7647541:-	ri	0.22	0.16	0.28	0.36	0.31	0.42	-0.14	17.41	'chr3R:7647698:7647833:-@chr3R:7647002:7647541:-.A.withRI','chr3R:7647698:7647833:-@chr3R:7647002:7647541:-.B.dn_chr3R:7647698:7647833:-@chr3R:7647002:7647541:-.B.up'	(0,0):241,(0,1):6,(1,0):51,(1,1):679	0:215,1:521	(0,0):408,(0,1):3,(1,0):167,(1,1):1357	0:613,1:914	chr3R	-	76470027647002	76478337647833
170	ATPsynD	chr3R:14920714:14920796|14920743:+@chr3R:14921119:14921792:+	a5ss	0.43	0.39	0.47	0.57	0.55	0.6	-0.14	1000000000000	'chr3R:14920714:14920796|14920743:+@chr3R:14921119:14921792:+.A.coreAndExt_chr3R:14920714:14920796|14920743:+@chr3R:14921119:14921792:+.A.dn','chr3R:14920714:14920796|14920743:+@chr3R:14921119:14921792:+.B.core_chr3R:14920714:14920796|14920743:+@chr3R:14921119:14921792:+.B.dn'	(0,0):168,(0,1):86,(1,0):460,(1,1):8725	0:4349,1:4922	(0,0):457,(0,1):196,(1,0):1493,(1,1):20378	0:13399,1:8668	chr3R	+	1492071414920710	1492179214921790
171	CG17508	chr2R:1496109:1496340|1496287:+@chr2R:1496518:1496994:+	a5ss	0.26	0.22	0.3	0.4	0.35	0.46	-0.14	239.23	'chr2R:1496109:1496340|1496287:+@chr2R:1496518:1496994:+.A.coreAndExt_chr2R:1496109:1496340|1496287:+@chr2R:1496518:1496994:+.A.dn','chr2R:1496109:1496340|1496287:+@chr2R:1496518:1496994:+.B.core_chr2R:1496109:1496340|1496287:+@chr2R:1496518:1496994:+.B.dn'	(0,0):972,(0,1):18,(1,0):146,(1,1):3013	0:828,1:2349	(0,0):434,(0,1):9,(1,0):168,(1,1):1795	0:831,1:1141	chr2R	+	14961091496109	14969941496994
172	Hrb27C	chr2L:6920793:6920861:+@chr2L:6922638:6922826:+@chr2L:6923784:6924400:+	se	0.47	0.43	0.51	0.61	0.58	0.64	-0.14	1000000000000	'chr2L:6920793:6920861:+@chr2L:6922638:6922826:+@chr2L:6923784:6924400:+.A.up_chr2L:6920793:6920861:+@chr2L:6922638:6922826:+@chr2L:6923784:6924400:+.A.se_chr2L:6920793:6920861:+@chr2L:6922638:6922826:+@chr2L:6923784:6924400:+.A.dn','chr2L:6920793:6920861:+@chr2L:6922638:6922826:+@chr2L:6923784:6924400:+.B.up_chr2L:6920793:6920861:+@chr2L:6922638:6922826:+@chr2L:6923784:6924400:+.B.dn'	(0,0):944,(0,1):105,(1,0):554,(1,1):2269	0:1632,1:1296	(0,0):1301,(0,1):301,(1,0):1250,(1,1):2286	0:2686,1:1151	chr2L	+	69207936920793	69244006924400
173	CG11073	chr2R:17986487:17987019:-@chr2R:17982029:17982292:-	ri	0.05	0.03	0.08	0.18	0.14	0.21	-0.13	1000000000000	'chr2R:17986487:17987019:-@chr2R:17982029:17982292:-.A.withRI','chr2R:17986487:17987019:-@chr2R:17982029:17982292:-.B.dn_chr2R:17986487:17987019:-@chr2R:17982029:17982292:-.B.up'	(0,0):9,(0,1):14,(1,0):21,(1,1):48	0:24,1:59	(0,0):30,(0,1):26,(1,0):246,(1,1):171	0:279,1:164	chr2R	-	1798202917982020	1798701917987010
174	Herp	chr2L:7799833:7799846:-@chr2L:7798163:7798623:-	ri	0.18	0.16	0.21	0.31	0.27	0.34	-0.13	1000000000000	'chr2L:7799833:7799846:-@chr2L:7798163:7798623:-.A.withRI','chr2L:7799833:7799846:-@chr2L:7798163:7798623:-.B.dn_chr2L:7799833:7799846:-@chr2L:7798163:7798623:-.B.up'	(0,0):470,(1,0):528,(1,1):660	0:641,1:547	(0,0):658,(1,0):667,(1,1):515	0:819,1:363	chr2L	-	77981637798163	77998467799846
175	Rab11	chr3R:16937129:16937188:+@chr3R:16937377:16937577:+	ri	0.06	0.05	0.06	0.19	0.17	0.2	-0.13	1000000000000	'chr3R:16937129:16937188:+@chr3R:16937377:16937577:+.A.withRI','chr3R:16937129:16937188:+@chr3R:16937377:16937577:+.B.up_chr3R:16937129:16937188:+@chr3R:16937377:16937577:+.B.dn'	(0,0):243,(0,1):553,(1,0):195,(1,1):672	0:233,1:1187	(0,0):104,(0,1):615,(1,0):895,(1,1):1033	0:1088,1:1455	chr3R	+	1693712916937120	1693757716937570
176	CG6891	chrX:18673683:18673878:+@chrX:18674714:18675037:+	ri	0.01	0	0.01	0.14	0.11	0.18	-0.13	1000000000000	'chrX:18673683:18673878:+@chrX:18674714:18675037:+.A.withRI','chrX:18673683:18673878:+@chrX:18674714:18675037:+.B.up_chrX:18673683:18673878:+@chrX:18674714:18675037:+.B.dn'	(0,0):1073,(0,1):2,(1,0):23,(1,1):1267	0:35,1:1257	(0,0):218,(0,1):13,(1,0):77,(1,1):195	0:93,1:192	chrX	+	1867368318673680	1867503718675030
177	sick	chr2L:19935524:19935527:+@chr2L:19945270:19946702:+	ri	0.12	0.09	0.15	0.25	0.22	0.29	-0.13	4.4929e+10	'chr2L:19935524:19935527:+@chr2L:19945270:19946702:+.A.withRI','chr2L:19935524:19935527:+@chr2L:19945270:19946702:+.B.up_chr2L:19935524:19935527:+@chr2L:19945270:19946702:+.B.dn'	(0,0):10,(1,0):95,(1,1):107	0:107,1:95	(0,0):42,(0,1):2,(1,0):660,(1,1):336	0:728,1:270	chr2L	+	1993552419935520	1994670219946700
178	AkhR	chr2L:6716026:6716183:-@chr2L:6714555:6714767:-	ri	0.04	0.03	0.06	0.17	0.11	0.23	-0.13	463910	'chr2L:6716026:6716183:-@chr2L:6714555:6714767:-.A.withRI','chr2L:6716026:6716183:-@chr2L:6714555:6714767:-.B.dn_chr2L:6716026:6716183:-@chr2L:6714555:6714767:-.B.up'	(0,0):37,(0,1):62,(1,0):33,(1,1):44	0:37,1:102	(0,0):16,(0,1):16,(1,0):71,(1,1):43	0:79,1:51	chr2L	-	67145556714555	67161836716183
179	CG1518	chrX:20923437:20923826:-@chrX:20922153:20922632:-	ri	0.23	0.2	0.27	0.36	0.3	0.42	-0.13	18.75	'chrX:20923437:20923826:-@chrX:20922153:20922632:-.A.withRI','chrX:20923437:20923826:-@chrX:20922153:20922632:-.B.dn_chrX:20923437:20923826:-@chrX:20922153:20922632:-.B.up'	(0,0):537,(0,1):1,(1,0):180,(1,1):647	0:347,1:481	(0,0):407,(0,1):3,(1,0):197,(1,1):462	0:381,1:281	chrX	-	2092215320922150	2092382620923820
180	CG42837	chr2R:12083891:12084107|12084077:+@chr2R:12084197:12084459:+	a5ss	0.54	0.5	0.58	0.67	0.64	0.7	-0.13	1188.42	'chr2R:12083891:12084107|12084077:+@chr2R:12084197:12084459:+.A.coreAndExt_chr2R:12083891:12084107|12084077:+@chr2R:12084197:12084459:+.A.dn','chr2R:12083891:12084107|12084077:+@chr2R:12084197:12084459:+.B.core_chr2R:12083891:12084107|12084077:+@chr2R:12084197:12084459:+.B.dn'	(0,0):24,(0,1):172,(1,0):392,(1,1):716	0:722,1:558	(0,0):79,(0,1):189,(1,0):825,(1,1):1124	0:1510,1:628	chr2R	+	1208389112083890	1208445912084450
181	Phb2	chr2R:14708689:14708788:+@chr2R:14709481:14709793:+	ri	0.84	0.81	0.87	0.96	0.94	0.97	-0.12	1000000000000	'chr2R:14708689:14708788:+@chr2R:14709481:14709793:+.A.withRI','chr2R:14708689:14708788:+@chr2R:14709481:14709793:+.B.up_chr2R:14708689:14708788:+@chr2R:14709481:14709793:+.B.dn'	(0,0):218,(0,1):79,(1,0):2048,(1,1):90	0:2123,1:94	(0,0):369,(0,1):59,(1,0):5486,(1,1):57	0:5539,1:63	chr2R	+	1470868914708680	1470979314709790
182	CG4390	chr3R:15883164:15883282:-@chr3R:15882135:15883096:-	ri	0.04	0.02	0.06	0.16	0.13	0.19	-0.12	1000000000000	'chr3R:15883164:15883282:-@chr3R:15882135:15883096:-.A.withRI','chr3R:15883164:15883282:-@chr3R:15882135:15883096:-.B.dn_chr3R:15883164:15883282:-@chr3R:15882135:15883096:-.B.up'	(0,0):107,(0,1):266,(1,0):22,(1,1):4020	0:193,1:4115	(0,0):118,(0,1):217,(1,0):86,(1,1):3544	0:618,1:3229	chr3R	-	1588213515882130	1588328215883280
183	Gapdh2	chrX:15762153:15762276:+@chrX:15762351:15763694:+	ri	0	0	0.01	0.12	0.11	0.13	-0.12	1000000000000	'chrX:15762153:15762276:+@chrX:15762351:15763694:+.A.withRI','chrX:15762153:15762276:+@chrX:15762351:15763694:+.B.up_chrX:15762153:15762276:+@chrX:15762351:15763694:+.B.dn'	(0,0):1175,(0,1):1506,(1,0):15,(1,1):48143	0:241,1:49423	(0,0):1370,(0,1):1145,(1,0):552,(1,1):57541	0:7775,1:51463	chrX	+	1576215315762150	1576369415763690
184	RpL15	chr3LHet:2397802:2398001:+@chr3LHet:2398128:2398454:+	ri	0.1	0.09	0.11	0.22	0.21	0.23	-0.12	1000000000000	'chr3LHet:2397802:2398001:+@chr3LHet:2398128:2398454:+.A.withRI','chr3LHet:2397802:2398001:+@chr3LHet:2398128:2398454:+.B.up_chr3LHet:2397802:2398001:+@chr3LHet:2398128:2398454:+.B.dn'	(0,0):4175,(0,1):13,(1,0):891,(1,1):22903	0:3111,1:20696	(0,0):2779,(0,1):36,(1,0):2211,(1,1):26942	0:7861,1:21328	chr3LHet	+	23978022397802	23984542398454
185	Pdk1	chr3L:132867:132935:+@chr3L:135458:135842:+	ri	0.07	0.05	0.1	0.19	0.16	0.23	-0.12	3.34779e+09	'chr3L:132867:132935:+@chr3L:135458:135842:+.A.withRI','chr3L:132867:132935:+@chr3L:135458:135842:+.B.up_chr3L:132867:132935:+@chr3L:135458:135842:+.B.dn'	(0,0):35,(0,1):1,(1,0):63,(1,1):89	0:69,1:84	(0,0):105,(1,0):283,(1,1):154	0:308,1:129	chr3L	+	132867132867	135842135842
186	Pp1-87B	chr3R:8250333:8251639:-@chr3R:8249673:8249908:-	ri	0.87	0.82	0.92	0.99	0.99	1	-0.12	2.15166e+08	'chr3R:8250333:8251639:-@chr3R:8249673:8249908:-.A.withRI','chr3R:8250333:8251639:-@chr3R:8249673:8249908:-.B.dn_chr3R:8250333:8251639:-@chr3R:8249673:8249908:-.B.up'	(0,0):935,(0,1):3,(1,0):1295,(1,1):4632	0:5220,1:710	(0,0):2188,(0,1):4,(1,0):3437,(1,1):7424	0:10831,1:34	chr3R	-	82496738249673	82516398251639
187	pyd	chr3R:4664114:4664711:-@chr3R:4660999:4661232:-	ri	0.11	0.09	0.15	0.23	0.19	0.27	-0.12	3.86818e+07	'chr3R:4664114:4664711:-@chr3R:4660999:4661232:-.A.withRI','chr3R:4664114:4664711:-@chr3R:4660999:4661232:-.B.dn_chr3R:4664114:4664711:-@chr3R:4660999:4661232:-.B.up'	(0,0):30,(0,1):30,(1,0):88,(1,1):134	0:98,1:154	(0,0):100,(0,1):47,(1,0):271,(1,1):192	0:324,1:186	chr3R	-	46609994660999	46647114664711
188	Rip11	chrX:18531446:18531606:-@chrX:18529675:18530352:-	ri	0.19	0.16	0.23	0.31	0.27	0.35	-0.12	247.01	'chrX:18531446:18531606:-@chrX:18529675:18530352:-.A.withRI','chrX:18531446:18531606:-@chrX:18529675:18530352:-.B.dn_chrX:18531446:18531606:-@chrX:18529675:18530352:-.B.up'	(0,0):342,(0,1):39,(1,0):192,(1,1):511	0:290,1:452	(0,0):309,(0,1):33,(1,0):338,(1,1):584	0:504,1:451	chrX	-	1852967518529670	1853160618531600
189	Pdk1	chr3L:131849:131958:+@chr3L:135458:135842:+	ri	0.16	0.12	0.21	0.28	0.24	0.34	-0.12	44.12	'chr3L:131849:131958:+@chr3L:135458:135842:+.A.withRI','chr3L:131849:131958:+@chr3L:135458:135842:+.B.up_chr3L:131849:131958:+@chr3L:135458:135842:+.B.dn'	(0,0):75,(1,0):167,(1,1):90	0:172,1:85	(0,0):189,(0,1):3,(1,0):512,(1,1):154	0:560,1:109	chr3L	+	131849131849	135842135842
190	bic	chr2R:8757760:8757835:+@chr2R:8757908:8759608:+	ri	0.02	0.01	0.02	0.13	0.12	0.14	-0.11	1000000000000	'chr2R:8757760:8757835:+@chr2R:8757908:8759608:+.A.withRI','chr2R:8757760:8757835:+@chr2R:8757908:8759608:+.B.up_chr2R:8757760:8757835:+@chr2R:8757908:8759608:+.B.dn'	(0,0):436,(0,1):1452,(1,0):43,(1,1):18578	0:267,1:19806	(0,0):1058,(0,1):2537,(1,0):747,(1,1):40820	0:5868,1:38236	chr2R	+	87577608757760	87596088759608
191	Cg25C	chr2L:5029620:5029810:+@chr2L:5030137:5030237:+	ri	0.02	0.01	0.05	0.13	0.11	0.16	-0.11	1000000000000	'chr2L:5029620:5029810:+@chr2L:5030137:5030237:+.A.withRI','chr2L:5029620:5029810:+@chr2L:5030137:5030237:+.B.up_chr2L:5029620:5029810:+@chr2L:5030137:5030237:+.B.dn'	(0,0):171,(0,1):41,(1,0):4,(1,1):11	0:4,1:52	(0,0):589,(0,1):170,(1,0):120,(1,1):36	0:126,1:200	chr2L	+	50296205029620	50302375030237
192	Pax	chr2L:19403999:19404682:-@chr2L:19400758:19401372:-	ri	0.22	0.21	0.23	0.33	0.32	0.35	-0.11	1000000000000	'chr2L:19403999:19404682:-@chr2L:19400758:19401372:-.A.withRI','chr2L:19403999:19404682:-@chr2L:19400758:19401372:-.B.dn_chr2L:19403999:19404682:-@chr2L:19400758:19401372:-.B.up'	(0,0):1681,(0,1):235,(1,0):2048,(1,1):3495	0:2811,1:2967	(0,0):3191,(0,1):336,(1,0):5620,(1,1):6369	0:7746,1:4579	chr2L	-	1940075819400750	1940468219404680
193	CG11876	chr3R:24939716:24939877:+@chr3R:24940816:24941227:+	ri	0.09	0.08	0.1	0.2	0.19	0.21	-0.11	1000000000000	'chr3R:24939716:24939877:+@chr3R:24940816:24941227:+.A.withRI','chr3R:24939716:24939877:+@chr3R:24940816:24941227:+.B.up_chr3R:24939716:24939877:+@chr3R:24940816:24941227:+.B.dn'	(0,0):539,(0,1):528,(1,0):388,(1,1):855	0:464,1:1307	(0,0):1315,(0,1):1105,(1,0):1497,(1,1):1141	0:1739,1:2004	chr3R	+	2493971624939710	2494122724941220
194	gammaCOP	chr3R:27397819:27398000:+@chr3R:27398223:27398878:+	ri	0.03	0.02	0.05	0.14	0.12	0.17	-0.11	1000000000000	'chr3R:27397819:27398000:+@chr3R:27398223:27398878:+.A.withRI','chr3R:27397819:27398000:+@chr3R:27398223:27398878:+.B.up_chr3R:27397819:27398000:+@chr3R:27398223:27398878:+.B.dn'	(0,0):156,(0,1):190,(1,0):16,(1,1):701	0:52,1:855	(0,0):170,(0,1):294,(1,0):101,(1,1):691	0:196,1:890	chr3R	+	2739781927397810	2739887827398870
195	gammaCOP	chr3R:27397819:27398000:+@chr3R:27398220:27398878:+	ri	0.04	0.02	0.06	0.15	0.12	0.18	-0.11	1000000000000	'chr3R:27397819:27398000:+@chr3R:27398220:27398878:+.A.withRI','chr3R:27397819:27398000:+@chr3R:27398220:27398878:+.B.up_chr3R:27397819:27398000:+@chr3R:27398220:27398878:+.B.dn'	(0,0):195,(0,1):151,(1,0):16,(1,1):701	0:51,1:817	(0,0):190,(0,1):274,(1,0):99,(1,1):693	0:191,1:875	chr3R	+	2739781927397810	2739887827398870
196	CG8974	chrX:15689926:15690082:-@chrX:15688530:15689134:-	ri	0.03	0.03	0.04	0.14	0.13	0.16	-0.11	1000000000000	'chrX:15689926:15690082:-@chrX:15688530:15689134:-.A.withRI','chrX:15689926:15690082:-@chrX:15688530:15689134:-.B.dn_chrX:15689926:15690082:-@chrX:15688530:15689134:-.B.up'	(0,0):244,(0,1):131,(1,0):67,(1,1):1193	0:111,1:1280	(0,0):672,(0,1):89,(1,0):336,(1,1):1542	0:553,1:1414	chrX	-	1568853015688530	1569008215690080
197	Pdk1	chr3L:131849:131933:+@chr3L:135458:135842:+	ri	0.15	0.12	0.19	0.26	0.21	0.31	-0.11	31.01	'chr3L:131849:131933:+@chr3L:135458:135842:+.A.withRI','chr3L:131849:131933:+@chr3L:135458:135842:+.B.up_chr3L:131849:131933:+@chr3L:135458:135842:+.B.dn'	(0,0):75,(1,0):168,(1,1):89	0:176,1:81	(0,0):189,(0,1):3,(1,0):512,(1,1):154	0:549,1:120	chr3L	+	131849131849	135842135842
198	CG42837	chr2R:12083891:12084077:+@chr2R:12084197:12084459:+	ri	0.16	0.14	0.18	0.26	0.24	0.29	-0.1	1000000000000	'chr2R:12083891:12084077:+@chr2R:12084197:12084459:+.A.withRI','chr2R:12083891:12084077:+@chr2R:12084197:12084459:+.B.up_chr2R:12083891:12084077:+@chr2R:12084197:12084459:+.B.dn'	(0,0):256,(0,1):254,(1,0):160,(1,1):634	0:229,1:819	(0,0):419,(0,1):343,(1,0):485,(1,1):970	0:636,1:1162	chr2R	+	1208389112083890	1208445912084450
199	CG6145	chr2R:9432813:9432928:-@chr2R:9426477:9426854:-	ri	0.08	0.06	0.1	0.18	0.15	0.21	-0.1	1000000000000	'chr2R:9432813:9432928:-@chr2R:9426477:9426854:-.A.withRI','chr2R:9432813:9432928:-@chr2R:9426477:9426854:-.B.dn_chr2R:9432813:9432928:-@chr2R:9426477:9426854:-.B.up'	(0,0):175,(0,1):1,(1,0):191,(1,1):119	0:204,1:107	(0,0):472,(0,1):2,(1,0):764,(1,1):217	0:797,1:186	chr2R	-	94264779426477	94329289432928
200	IntS3	chr2R:129594:130204:-@chr2R:126028:126661:-	ri	0.05	0.04	0.07	0.15	0.12	0.18	-0.1	1000000000000	'chr2R:129594:130204:-@chr2R:126028:126661:-.A.withRI','chr2R:129594:130204:-@chr2R:126028:126661:-.B.dn_chr2R:129594:130204:-@chr2R:126028:126661:-.B.up'	(0,0):60,(0,1):55,(1,0):78,(1,1):445	0:98,1:480	(0,0):54,(0,1):45,(1,0):165,(1,1):331	0:224,1:317	chr2R	-	126028126028	130204130204
201	Gs1	chr2L:132060:132255:+@chr2L:132476:133995:+	ri	0.03	0.02	0.03	0.13	0.12	0.13	-0.1	1000000000000	'chr2L:132060:132255:+@chr2L:132476:133995:+.A.withRI','chr2L:132060:132255:+@chr2L:132476:133995:+.B.up_chr2L:132060:132255:+@chr2L:132476:133995:+.B.dn'	(0,0):575,(0,1):2004,(1,0):122,(1,1):12907	0:473,1:14560	(0,0):803,(0,1):2816,(1,0):810,(1,1):18901	0:3210,1:19317	chr2L	+	132060132060	133995133995
202	Irp-1B	chr3R:6236501:6237011:-@chr3R:6236338:6236438:-	ri	0.01	0	0.02	0.11	0.07	0.15	-0.1	1000000000000	'chr3R:6236501:6237011:-@chr3R:6236338:6236438:-.A.withRI','chr3R:6236501:6237011:-@chr3R:6236338:6236438:-.B.dn_chr3R:6236501:6237011:-@chr3R:6236338:6236438:-.B.up'	(0,0):282,(0,1):144,(1,0):3,(1,1):1389	0:12,1:1524	(0,0):202,(0,1):78,(1,0):31,(1,1):1164	0:146,1:1127	chr3R	-	62363386236338	62370116237011
203	eIF3ga	chrX:2504279:2504526:-@chrX:2503175:2504215:-	ri	0	0	0.01	0.1	0.08	0.11	-0.1	1000000000000	'chrX:2504279:2504526:-@chrX:2503175:2504215:-.A.withRI','chrX:2504279:2504526:-@chrX:2503175:2504215:-.B.dn_chrX:2504279:2504526:-@chrX:2503175:2504215:-.B.up'	(0,0):77,(0,1):328,(1,0):2,(1,1):4148	0:14,1:4464	(0,0):110,(0,1):635,(1,0):146,(1,1):6002	0:625,1:6158	chrX	-	25031752503175	25045262504526
204	CG8974	chrX:15689998:15690082:-@chrX:15688530:15689134:-	ri	0.04	0.03	0.05	0.14	0.12	0.15	-0.1	1000000000000	'chrX:15689998:15690082:-@chrX:15688530:15689134:-.A.withRI','chrX:15689998:15690082:-@chrX:15688530:15689134:-.B.dn_chrX:15689998:15690082:-@chrX:15688530:15689134:-.B.up'	(0,0):362,(0,1):13,(1,0):90,(1,1):1170	0:145,1:1128	(0,0):749,(0,1):12,(1,0):365,(1,1):1513	0:597,1:1293	chrX	-	1568853015688530	1569008215690080
205	CG8974	chrX:15689909:15690082:-@chrX:15688530:15689134:-	ri	0.03	0.02	0.04	0.13	0.12	0.15	-0.1	1000000000000	'chrX:15689909:15690082:-@chrX:15688530:15689134:-.A.withRI','chrX:15689909:15690082:-@chrX:15688530:15689134:-.B.dn_chrX:15689909:15690082:-@chrX:15688530:15689134:-.B.up'	(0,0):239,(0,1):136,(1,0):61,(1,1):1199	0:105,1:1291	(0,0):656,(0,1):105,(1,0):308,(1,1):1570	0:516,1:1467	chrX	-	1568853015688530	1569008215690080
206	CG9914	chrX:16202271:16202810:-@chrX:16201823:16202201:-	ri	0.01	0.01	0.01	0.11	0.09	0.12	-0.1	1000000000000	'chrX:16202271:16202810:-@chrX:16201823:16202201:-.A.withRI','chrX:16202271:16202810:-@chrX:16201823:16202201:-.B.dn_chrX:16202271:16202810:-@chrX:16201823:16202201:-.B.up'	(0,0):1161,(0,1):1677,(1,0):31,(1,1):6640	0:96,1:8252	(0,0):2300,(0,1):725,(1,0):187,(1,1):6500	0:993,1:6419	chrX	-	1620182316201820	1620281016202810
207	REG	chrX:13106389:13106425:+@chrX:13106497:13106991:+	ri	0.07	0.05	0.09	0.17	0.15	0.2	-0.1	1000000000000	'chrX:13106389:13106425:+@chrX:13106497:13106991:+.A.withRI','chrX:13106389:13106425:+@chrX:13106497:13106991:+.B.up_chrX:13106389:13106425:+@chrX:13106497:13106991:+.B.dn'	(0,0):143,(0,1):231,(1,0):37,(1,1):1225	0:107,1:1386	(0,0):247,(0,1):350,(1,0):162,(1,1):2113	0:505,1:2120	chrX	+	1310638913106380	1310699113106990
208	RpL15	chr3LHet:2397802:2397991:+@chr3LHet:2398128:2398454:+	ri	0.09	0.09	0.1	0.19	0.19	0.2	-0.1	1000000000000	'chr3LHet:2397802:2397991:+@chr3LHet:2398128:2398454:+.A.withRI','chr3LHet:2397802:2397991:+@chr3LHet:2398128:2398454:+.B.up_chr3LHet:2397802:2397991:+@chr3LHet:2398128:2398454:+.B.dn'	(0,0):4168,(0,1):20,(1,0):892,(1,1):22902	0:3071,1:20743	(0,0):2760,(0,1):55,(1,0):2211,(1,1):26942	0:7281,1:21927	chr3LHet	+	23978022397802	23984542398454
209	PMCA	chr4:363548:363686:-@chr4:350897:350965:-	ri	0.12	0.09	0.15	0.22	0.18	0.27	-0.1	50.6	'chr4:363548:363686:-@chr4:350897:350965:-.A.withRI','chr4:363548:363686:-@chr4:350897:350965:-.B.dn_chr4:363548:363686:-@chr4:350897:350965:-.B.up'	(0,0):528,(0,1):32,(1,0):2279,(1,1):33	0:2285,1:59	(0,0):948,(0,1):46,(1,0):5172,(1,1):25	0:5181,1:62	chr4	-	350897350897	363686363686
210	pyd	chr3R:4664114:4664711:-@chr3R:4660079:4660671:-	ri	0.15	0.12	0.18	0.25	0.22	0.29	-0.1	34.57	'chr3R:4664114:4664711:-@chr3R:4660079:4660671:-.A.withRI','chr3R:4664114:4664711:-@chr3R:4660079:4660671:-.B.dn_chr3R:4664114:4664711:-@chr3R:4660079:4660671:-.B.up'	(0,0):117,(0,1):2,(1,0):112,(1,1):217	0:148,1:183	(0,0):247,(0,1):13,(1,0):299,(1,1):325	0:392,1:245	chr3R	-	46600794660079	46647114664711
211	Pdk1	chr3L:131849:131913:+@chr3L:135458:135842:+	ri	0.14	0.1	0.18	0.24	0.2	0.29	-0.1	22.39	'chr3L:131849:131913:+@chr3L:135458:135842:+.A.withRI','chr3L:131849:131913:+@chr3L:135458:135842:+.B.up_chr3L:131849:131913:+@chr3L:135458:135842:+.B.dn'	(0,0):75,(1,0):168,(1,1):89	0:180,1:77	(0,0):190,(0,1):2,(1,0):512,(1,1):154	0:545,1:123	chr3L	+	131849131849	135842135842
212	CG6145	chr2R:9434020:9434521:-@chr2R:9426477:9426854:-	ri	0.1	0.08	0.12	0.19	0.17	0.22	-0.09	1000000000000	'chr2R:9434020:9434521:-@chr2R:9426477:9426854:-.A.withRI','chr2R:9434020:9434521:-@chr2R:9426477:9426854:-.B.dn_chr2R:9434020:9434521:-@chr2R:9426477:9426854:-.B.up'	(0,0):169,(0,1):24,(1,0):204,(1,1):171	0:215,1:184	(0,0):468,(0,1):28,(1,0):810,(1,1):369	0:887,1:320	chr2R	-	94264779426477	94345219434521
213	bbg	chr3L:14469474:14469788:-@chr3L:14407867:14410295:-	ri	0.91	0.88	0.94	1	1	1	-0.09	1000000000000	'chr3L:14469474:14469788:-@chr3L:14407867:14410295:-.A.withRI','chr3L:14469474:14469788:-@chr3L:14407867:14410295:-.B.dn_chr3L:14469474:14469788:-@chr3L:14407867:14410295:-.B.up'	(0,0):1256,(0,1):11,(1,0):39699,(1,1):1750	0:41265,1:195	(0,0):5701,(0,1):8,(1,0):324144,(1,1):4437	0:328574,1:15	chr3L	-	1440786714407860	1446978814469780
214	fbl	chr3L:20377531:20377958:+@chr3L:20381769:20381947:+	ri	0.11	0.1	0.13	0.2	0.18	0.22	-0.09	1000000000000	'chr3L:20377531:20377958:+@chr3L:20381769:20381947:+.A.withRI','chr3L:20377531:20377958:+@chr3L:20381769:20381947:+.B.up_chr3L:20377531:20377958:+@chr3L:20381769:20381947:+.B.dn'	(0,0):389,(0,1):135,(1,0):649,(1,1):452	0:699,1:537	(0,0):702,(0,1):114,(1,0):1084,(1,1):437	0:1173,1:462	chr3L	+	2037753120377530	2038194720381940
215	Zasp66	chr3L:8623370:8623476:+@chr3L:8623617:8623735:+	ri	0.04	0.03	0.04	0.13	0.12	0.14	-0.09	1000000000000	'chr3L:8623370:8623476:+@chr3L:8623617:8623735:+.A.withRI','chr3L:8623370:8623476:+@chr3L:8623617:8623735:+.B.up_chr3L:8623370:8623476:+@chr3L:8623617:8623735:+.B.dn'	(0,0):970,(0,1):415,(1,0):84,(1,1):314	0:88,1:725	(0,0):1696,(0,1):654,(1,0):573,(1,1):645	0:585,1:1287	chr3L	+	86233708623370	86237358623735
216	NTPase	chr2L:2882692:2882833:-@chr2L:2881382:2882511:-	ri	0.02	0.02	0.03	0.11	0.09	0.12	-0.09	1000000000000	'chr2L:2882692:2882833:-@chr2L:2881382:2882511:-.A.withRI','chr2L:2882692:2882833:-@chr2L:2881382:2882511:-.B.dn_chr2L:2882692:2882833:-@chr2L:2881382:2882511:-.B.up'	(0,0):505,(0,1):470,(1,0):30,(1,1):3907	0:99,1:4308	(0,0):510,(0,1):437,(1,0):147,(1,1):4543	0:582,1:4545	chr2L	-	28813822881382	28828332882833
217	CG17734	chr3R:7068546:7068735:-@chr3R:7067930:7068285:-	ri	0.02	0.02	0.03	0.11	0.1	0.12	-0.09	1000000000000	'chr3R:7068546:7068735:-@chr3R:7067930:7068285:-.A.withRI','chr3R:7068546:7068735:-@chr3R:7067930:7068285:-.B.dn_chr3R:7068546:7068735:-@chr3R:7067930:7068285:-.B.up'	(0,0):226,(0,1):873,(1,0):52,(1,1):1028	0:80,1:1873	(0,0):212,(0,1):1182,(1,0):341,(1,1):1164	0:482,1:2205	chr3R	-	70679307067930	70687357068735
218	ATPsynE	chr3R:10152746:10152810:+@chr3R:10152975:10153473:+	ri	0.04	0.03	0.05	0.13	0.12	0.14	-0.09	1000000000000	'chr3R:10152746:10152810:+@chr3R:10152975:10153473:+.A.withRI','chr3R:10152746:10152810:+@chr3R:10152975:10153473:+.B.up_chr3R:10152746:10152810:+@chr3R:10152975:10153473:+.B.dn'	(0,0):1483,(0,1):3,(1,0):97,(1,1):5585	0:301,1:5384	(0,0):2824,(0,1):4,(1,0):592,(1,1):10411	0:1935,1:9072	chr3R	+	1015274610152740	1015347310153470
219	TER94	chr2R:5879542:5880201:+@chr2R:5880271:5880422:+	ri	0.1	0.08	0.13	0.19	0.16	0.22	-0.09	1052.1	'chr2R:5879542:5880201:+@chr2R:5880271:5880422:+.A.withRI','chr2R:5879542:5880201:+@chr2R:5880271:5880422:+.B.up_chr2R:5879542:5880201:+@chr2R:5880271:5880422:+.B.dn'	(0,0):808,(0,1):27,(1,0):53,(1,1):2537	0:267,1:2350	(0,0):979,(0,1):40,(1,0):129,(1,1):2758	0:636,1:2291	chr2R	+	58795425879542	58804225880422
220	CG7766	chrX:8995129:8995452:-@chrX:8992117:8992446:-	ri	0.09	0.07	0.12	0.18	0.15	0.21	-0.09	35.29	'chrX:8995129:8995452:-@chrX:8992117:8992446:-.A.withRI','chrX:8995129:8995452:-@chrX:8992117:8992446:-.B.dn_chrX:8995129:8995452:-@chrX:8992117:8992446:-.B.up'	(0,0):251,(0,1):2,(1,0):94,(1,1):170	0:105,1:161	(0,0):467,(0,1):8,(1,0):276,(1,1):259	0:328,1:215	chrX	-	89921178992117	89954528995452
221	Kat60	chr3R:1055429:1055550:-@chr3R:1053999:1054558:-	ri	0.04	0.02	0.07	0.13	0.1	0.17	-0.09	27.71	'chr3R:1055429:1055550:-@chr3R:1053999:1054558:-.A.withRI','chr3R:1055429:1055550:-@chr3R:1053999:1054558:-.B.dn_chr3R:1055429:1055550:-@chr3R:1053999:1054558:-.B.up'	(0,0):34,(0,1):37,(1,0):11,(1,1):97	0:12,1:133	(0,0):75,(0,1):66,(1,0):59,(1,1):139	0:79,1:185	chr3R	-	10539991053999	10555501055550
222	Cnx99A	chr3R:25145174:25145215:-@chr3R:25143996:25144334:-	ri	0.18	0.16	0.22	0.27	0.23	0.31	-0.09	20.41	'chr3R:25145174:25145215:-@chr3R:25143996:25144334:-.A.withRI','chr3R:25145174:25145215:-@chr3R:25143996:25144334:-.B.dn_chr3R:25145174:25145215:-@chr3R:25143996:25144334:-.B.up'	(0,0):691,(1,0):298,(1,1):358	0:353,1:303	(0,0):980,(1,0):429,(1,1):362	0:529,1:262	chr3R	-	2514399625143990	2514521525145210
223	DIP1	chrX:21501001:21501058:-@chrX:21497340:21497917:-	ri	0.25	0.22	0.29	0.34	0.3	0.37	-0.09	18.31	'chrX:21501001:21501058:-@chrX:21497340:21497917:-.A.withRI','chrX:21501001:21501058:-@chrX:21497340:21497917:-.B.dn_chrX:21501001:21501058:-@chrX:21497340:21497917:-.B.up'	(0,0):257,(0,1):1,(1,0):616,(1,1):346	0:711,1:252	(0,0):573,(0,1):1,(1,0):1282,(1,1):551	0:1449,1:385	chrX	-	2149734021497340	2150105821501050
224	TRAM	chrX:829364:829742|829417:+@chrX:830363:831786:+	a5ss	0.78	0.73	0.82	0.87	0.83	0.92	-0.09	13.58	'chrX:829364:829742|829417:+@chrX:830363:831786:+.A.coreAndExt_chrX:829364:829742|829417:+@chrX:830363:831786:+.A.dn','chrX:829364:829742|829417:+@chrX:830363:831786:+.B.core_chrX:829364:829742|829417:+@chrX:830363:831786:+.B.dn'	(0,0):524,(1,0):1590,(1,1):8075	0:7906,1:1759	(0,0):419,(1,0):1759,(1,1):7999	0:8731,1:1027	chrX	+	829364829364	831786831786
225	mthl3	chr2R:13339958:13340078:-@chr2R:13338034:13338537:-	ri	0.06	0.05	0.08	0.14	0.12	0.16	-0.08	1000000000000	'chr2R:13339958:13340078:-@chr2R:13338034:13338537:-.A.withRI','chr2R:13339958:13340078:-@chr2R:13338034:13338537:-.B.dn_chr2R:13339958:13340078:-@chr2R:13338034:13338537:-.B.up'	(0,0):96,(0,1):57,(1,0):79,(1,1):310	0:107,1:339	(0,0):124,(0,1):30,(1,0):229,(1,1):458	0:288,1:429	chr2R	-	1333803413338030	1334007813340070
226	CG9451	chr3L:19493638:19494022:-@chr3L:19492723:19492821:-	ri	0.01	0	0.03	0.09	0.07	0.12	-0.08	1000000000000	'chr3L:19493638:19494022:-@chr3L:19492723:19492821:-.A.withRI','chr3L:19493638:19494022:-@chr3L:19492723:19492821:-.B.dn_chr3L:19493638:19494022:-@chr3L:19492723:19492821:-.B.up'	(0,0):27,(0,1):47,(1,0):3,(1,1):51	0:3,1:98	(0,0):64,(0,1):155,(1,0):93,(1,1):126	0:104,1:270	chr3L	-	1949272319492720	1949402219494020
227	CycG	chr3R:27436603:27436706:-@chr3R:27427138:27427945:-	ri	0.05	0.04	0.05	0.13	0.12	0.13	-0.08	1000000000000	'chr3R:27436603:27436706:-@chr3R:27427138:27427945:-.A.withRI','chr3R:27436603:27436706:-@chr3R:27427138:27427945:-.B.dn_chr3R:27436603:27436706:-@chr3R:27427138:27427945:-.B.up'	(0,0):1135,(0,1):182,(1,0):2153,(1,1):3659	0:2346,1:3648	(0,0):1291,(0,1):219,(1,0):6531,(1,1):4051	0:7006,1:3795	chr3R	-	2742713827427130	2743670627436700
228	CG8974	chrX:15690035:15690082:-@chrX:15688530:15689134:-	ri	0.04	0.03	0.05	0.12	0.11	0.14	-0.08	1000000000000	'chrX:15690035:15690082:-@chrX:15688530:15689134:-.A.withRI','chrX:15690035:15690082:-@chrX:15688530:15689134:-.B.dn_chrX:15690035:15690082:-@chrX:15688530:15689134:-.B.up'	(0,0):330,(0,1):45,(1,0):90,(1,1):1170	0:142,1:1163	(0,0):732,(0,1):29,(1,0):365,(1,1):1513	0:564,1:1343	chrX	-	1568853015688530	1569008215690080
229	CG7766	chrX:8993347:8993494:-@chrX:8992117:8992446:-	ri	0.06	0.04	0.08	0.14	0.11	0.16	-0.08	9.16948e+07	'chrX:8993347:8993494:-@chrX:8992117:8992446:-.A.withRI','chrX:8993347:8993494:-@chrX:8992117:8992446:-.B.dn_chrX:8993347:8993494:-@chrX:8992117:8992446:-.B.up'	(0,0):60,(0,1):79,(1,0):41,(1,1):111	0:49,1:182	(0,0):168,(0,1):123,(1,0):161,(1,1):193	0:179,1:298	chrX	-	89921178992117	89934948993494
230	CG17124	chr2L:10756296:10755904|10753304:-@chr2L:10745782:10746078:-	a5ss	0.01	0.01	0.02	0.09	0.07	0.11	-0.08	1000000000000	'chr2L:10756296:10755904|10753304:-@chr2L:10745782:10746078:-.A.dn_chr2L:10756296:10755904|10753304:-@chr2L:10745782:10746078:-.A.coreAndExt','chr2L:10756296:10755904|10753304:-@chr2L:10745782:10746078:-.B.dn_chr2L:10756296:10755904|10753304:-@chr2L:10745782:10746078:-.B.core'	(0,0):144,(0,1):221,(1,0):30,(1,1):281	0:31,1:501	(0,0):136,(0,1):65,(1,0):114,(1,1):176	0:127,1:228	chr2L	-	1074578210745780	1075629610756290
231	Ect4	chr3L:8094426:8094593:+@chr3L:8095993:8097918:+	ri	0.03	0.02	0.04	0.1	0.09	0.11	-0.07	1000000000000	'chr3L:8094426:8094593:+@chr3L:8095993:8097918:+.A.withRI','chr3L:8094426:8094593:+@chr3L:8095993:8097918:+.B.up_chr3L:8094426:8094593:+@chr3L:8095993:8097918:+.B.dn'	(0,0):133,(1,0):45,(1,1):1820	0:104,1:1761	(0,0):264,(1,0):233,(1,1):3271	0:542,1:2962	chr3L	+	80944268094426	80979188097918
232	CycG	chr3R:27436603:27436706:-@chr3R:27427138:27427952:-	ri	0.04	0.04	0.04	0.11	0.11	0.12	-0.07	1000000000000	'chr3R:27436603:27436706:-@chr3R:27427138:27427952:-.A.withRI','chr3R:27436603:27436706:-@chr3R:27427138:27427952:-.B.dn_chr3R:27436603:27436706:-@chr3R:27427138:27427952:-.B.up'	(0,0):840,(0,1):477,(1,0):2140,(1,1):3672	0:2275,1:4014	(0,0):965,(0,1):545,(1,0):6492,(1,1):4090	0:6994,1:4133	chr3R	-	2742713827427130	2743670627436700
233	ATPsynE	chr3R:10152746:10152849:+@chr3R:10152975:10153473:+	ri	0.01	0.01	0.02	0.08	0.07	0.09	-0.07	1000000000000	'chr3R:10152746:10152849:+@chr3R:10152975:10153473:+.A.withRI','chr3R:10152746:10152849:+@chr3R:10152975:10153473:+.B.up_chr3R:10152746:10152849:+@chr3R:10152975:10153473:+.B.dn'	(0,0):211,(0,1):1275,(1,0):45,(1,1):5637	0:111,1:6846	(0,0):530,(0,1):2298,(1,0):525,(1,1):10478	0:1333,1:11968	chr3R	+	1015274610152740	1015347310153470
234	CycG, Med	chr3R:27438033:27438078:-@chr3R:27427138:27427952:-	ri	0.04	0.04	0.04	0.11	0.11	0.11	-0.07	1000000000000	'chr3R:27438033:27438078:-@chr3R:27427138:27427952:-.A.withRI','chr3R:27438033:27438078:-@chr3R:27427138:27427952:-.B.dn_chr3R:27438033:27438078:-@chr3R:27427138:27427952:-.B.up'	(0,0):1366,(0,1):1,(1,0):2332,(1,1):3671	0:2475,1:3529	(0,0):1592,(1,0):6774,(1,1):4089	0:7252,1:3611	chr3R	-	2742713827427130	2743807827438070
235	kay	chr3R:25607497:25607565:+@chr3R:25617115:25617442:+	ri	0.05	0.04	0.06	0.12	0.1	0.15	-0.07	1000000000000	'chr3R:25607497:25607565:+@chr3R:25617115:25617442:+.A.withRI','chr3R:25607497:25607565:+@chr3R:25617115:25617442:+.B.up_chr3R:25607497:25607565:+@chr3R:25617115:25617442:+.B.dn'	(0,0):203,(1,0):323,(1,1):128	0:327,1:124	(0,0):343,(0,1):7,(1,0):878,(1,1):146	0:894,1:137	chr3R	+	2560749725607490	2561744225617440
236	RpL22	chrX:657474:657827:-@chrX:656648:657024:-	ri	0.04	0.04	0.05	0.11	0.11	0.12	-0.07	1000000000000	'chrX:657474:657827:-@chrX:656648:657024:-.A.withRI','chrX:657474:657827:-@chrX:656648:657024:-.B.dn_chrX:657474:657827:-@chrX:656648:657024:-.B.up'	(0,0):3432,(0,1):378,(1,0):286,(1,1):6731	0:591,1:6804	(0,0):4909,(0,1):306,(1,0):913,(1,1):8866	0:1909,1:8176	chrX	-	656648656648	657827657827
237	ND-MNLL	chrX:7787688:7787837:-@chrX:7787086:7787523:-	ri	0.06	0.04	0.08	0.13	0.11	0.14	-0.07	1000000000000	'chrX:7787688:7787837:-@chrX:7787086:7787523:-.A.withRI','chrX:7787688:7787837:-@chrX:7787086:7787523:-.B.dn_chrX:7787688:7787837:-@chrX:7787086:7787523:-.B.up'	(0,0):602,(0,1):7,(1,0):55,(1,1):2250	0:215,1:2097	(0,0):1374,(0,1):28,(1,0):254,(1,1):4744	0:740,1:4286	chrX	-	77870867787086	77878377787837
238	wts	chr3R:26632010:26632317:-@chr3R:26626099:26626685:-	ri	0.04	0.02	0.06	0.11	0.09	0.13	-0.07	6.52852e+08	'chr3R:26632010:26632317:-@chr3R:26626099:26626685:-.A.withRI','chr3R:26632010:26632317:-@chr3R:26626099:26626685:-.B.dn_chr3R:26632010:26632317:-@chr3R:26626099:26626685:-.B.up'	(0,0):10,(0,1):9,(1,0):17,(1,1):57	0:18,1:65	(0,0):20,(0,1):15,(1,0):192,(1,1):212	0:207,1:212	chr3R	-	2662609926626090	2663231726632310
239	CG17746	chr3L:3239422:3239579:-@chr3L:3238612:3238982:-	ri	0.04	0.03	0.06	0.11	0.09	0.14	-0.07	54.1	'chr3L:3239422:3239579:-@chr3L:3238612:3238982:-.A.withRI','chr3L:3239422:3239579:-@chr3L:3238612:3238982:-.B.dn_chr3L:3239422:3239579:-@chr3L:3238612:3238982:-.B.up'	(0,0):52,(0,1):108,(1,0):21,(1,1):189	0:29,1:289	(0,0):75,(0,1):186,(1,0):92,(1,1):259	0:132,1:405	chr3L	-	32386123238612	32395793239579
240	CG7766	chrX:8994546:8994690:-@chrX:8992117:8992446:-	ri	0.08	0.06	0.11	0.15	0.12	0.18	-0.07	29.55	'chrX:8994546:8994690:-@chrX:8992117:8992446:-.A.withRI','chrX:8994546:8994690:-@chrX:8992117:8992446:-.B.dn_chrX:8994546:8994690:-@chrX:8992117:8992446:-.B.up'	(0,0):140,(0,1):14,(1,0):70,(1,1):103	0:76,1:111	(0,0):288,(0,1):24,(1,0):235,(1,1):183	0:261,1:181	chrX	-	89921178992117	89946908994690
241	CG32425	chr3L:20503132:20503879:+@chr3L:20503986|20505037:20505485:+	a3ss	0.09	0.07	0.1	0.16	0.14	0.18	-0.07	1.62758e+10	'chr3L:20503132:20503879:+@chr3L:20503986|20505037:20505485:+.A.up_chr3L:20503132:20503879:+@chr3L:20503986|20505037:20505485:+.A.coreAndExt','chr3L:20503132:20503879:+@chr3L:20503986|20505037:20505485:+.B.up_chr3L:20503132:20503879:+@chr3L:20503986|20505037:20505485:+.B.core'	(0,0):813,(0,1):12,(1,0):157,(1,1):1679	0:344,1:1504	(0,0):1246,(0,1):21,(1,0):268,(1,1):1577	0:534,1:1332	chr3L	+	2050313220503130	2050548520505480
242	CG17124	chr2L:10756296:10755904|10753317:-@chr2L:10745782:10746078:-	a5ss	0.01	0.01	0.02	0.08	0.07	0.1	-0.07	1000000000000	'chr2L:10756296:10755904|10753317:-@chr2L:10745782:10746078:-.A.dn_chr2L:10756296:10755904|10753317:-@chr2L:10745782:10746078:-.A.coreAndExt','chr2L:10756296:10755904|10753317:-@chr2L:10745782:10746078:-.B.dn_chr2L:10756296:10755904|10753317:-@chr2L:10745782:10746078:-.B.core'	(0,0):142,(0,1):221,(1,0):32,(1,1):281	0:33,1:501	(0,0):142,(0,1):65,(1,0):108,(1,1):176	0:115,1:234	chr2L	-	1074578210745780	1075629610756290
243	CG30497	chr2R:3669232:3670182:-@chr2R:3665980:3667390:-@chr2R:3625267:3629425:-	se	0.63	0.58	0.69	0.7	0.66	0.74	-0.07	0.49	'chr2R:3669232:3670182:-@chr2R:3665980:3667390:-@chr2R:3625267:3629425:-.A.dn_chr2R:3669232:3670182:-@chr2R:3665980:3667390:-@chr2R:3625267:3629425:-.A.se_chr2R:3669232:3670182:-@chr2R:3665980:3667390:-@chr2R:3625267:3629425:-.A.up','chr2R:3669232:3670182:-@chr2R:3665980:3667390:-@chr2R:3625267:3629425:-.B.dn_chr2R:3669232:3670182:-@chr2R:3665980:3667390:-@chr2R:3625267:3629425:-.B.up'	(0,0):527,(1,0):667,(1,1):3675	0:3086,1:1256	(0,0):1037,(1,0):1250,(1,1):6241	0:5676,1:1815	chr2R	-	36252673625267	36701823670182
244	lap	chr3R:3019315:3019410:+@chr3R:3019920:3020180:+@chr3R:3024050:3024417:+	se	0.15	0.1	0.22	0.22	0.15	0.29	-0.07	0.28	'chr3R:3019315:3019410:+@chr3R:3019920:3020180:+@chr3R:3024050:3024417:+.A.up_chr3R:3019315:3019410:+@chr3R:3019920:3020180:+@chr3R:3024050:3024417:+.A.se_chr3R:3019315:3019410:+@chr3R:3019920:3020180:+@chr3R:3024050:3024417:+.A.dn','chr3R:3019315:3019410:+@chr3R:3019920:3020180:+@chr3R:3024050:3024417:+.B.up_chr3R:3019315:3019410:+@chr3R:3019920:3020180:+@chr3R:3024050:3024417:+.B.dn'	(0,0):472,(1,0):26,(1,1):185	0:47,1:164	(0,0):615,(0,1):2,(1,0):51,(1,1):242	0:99,1:196	chr3R	+	30193153019315	30244173024417
245	scaf	chr2R:1579157:1579226:-@chr2R:1575181:1575543:-	ri	0.01	0.01	0.02	0.07	0.06	0.08	-0.06	1000000000000	'chr2R:1579157:1579226:-@chr2R:1575181:1575543:-.A.withRI','chr2R:1579157:1579226:-@chr2R:1575181:1575543:-.B.dn_chr2R:1579157:1579226:-@chr2R:1575181:1575543:-.B.up'	(0,0):9,(0,1):17,(1,0):12,(1,1):54	0:12,1:71	(0,0):162,(0,1):130,(1,0):569,(1,1):395	0:595,1:499	chr2R	-	15751811575181	15792261579226
246	CG4019	chr2R:19496454:19496728:-@chr2R:19495655:19496204:-	ri	0.02	0.01	0.03	0.08	0.07	0.1	-0.06	1000000000000	'chr2R:19496454:19496728:-@chr2R:19495655:19496204:-.A.withRI','chr2R:19496454:19496728:-@chr2R:19495655:19496204:-.B.dn_chr2R:19496454:19496728:-@chr2R:19495655:19496204:-.B.up'	(0,0):560,(0,1):72,(1,0):21,(1,1):2169	0:48,1:2214	(0,0):814,(0,1):22,(1,0):113,(1,1):3348	0:450,1:3033	chr2R	-	1949565519495650	1949672819496720
247	CG8399	chr2R:11907552:11907620:+@chr2R:11909394:11909881:+	ri	0.01	0	0.02	0.07	0.06	0.08	-0.06	1000000000000	'chr2R:11907552:11907620:+@chr2R:11909394:11909881:+.A.withRI','chr2R:11907552:11907620:+@chr2R:11909394:11909881:+.B.up_chr2R:11907552:11907620:+@chr2R:11909394:11909881:+.B.dn'	(0,0):17,(1,0):5,(1,1):124	0:5,1:124	(0,0):56,(1,0):143,(1,1):425	0:172,1:396	chr2R	+	1190755211907550	1190988111909880
248	CG15213	chr3L:5126228:5126503:-@chr3L:5125752:5126168:-	ri	0.01	0	0.03	0.07	0.06	0.08	-0.06	1000000000000	'chr3L:5126228:5126503:-@chr3L:5125752:5126168:-.A.withRI','chr3L:5126228:5126503:-@chr3L:5125752:5126168:-.B.dn_chr3L:5126228:5126503:-@chr3L:5125752:5126168:-.B.up'	(0,0):2,(0,1):93,(1,0):1,(1,1):268	0:3,1:359	(0,0):17,(0,1):1011,(1,0):151,(1,1):2526	0:274,1:3414	chr3L	-	51257525125752	51265035126503
249	Mlp84B, Alh	chr3R:2942374:2942645:-@chr3R:2939249:2941560:-	ri	0	0	0.01	0.06	0.05	0.07	-0.06	1000000000000	'chr3R:2942374:2942645:-@chr3R:2939249:2941560:-.A.withRI','chr3R:2942374:2942645:-@chr3R:2939249:2941560:-.B.dn_chr3R:2942374:2942645:-@chr3R:2939249:2941560:-.B.up'	(0,0):450,(0,1):46,(1,0):13,(1,1):9726	0:51,1:9734	(0,0):600,(0,1):150,(1,0):302,(1,1):13878	0:1130,1:13200	chr3R	-	29392492939249	29426452942645
250	Lsd-1	chr3R:19591598:19591788:+@chr3R:19591852:19592029:+	ri	0	0	0.01	0.06	0.04	0.07	-0.06	1000000000000	'chr3R:19591598:19591788:+@chr3R:19591852:19592029:+.A.withRI','chr3R:19591598:19591788:+@chr3R:19591852:19592029:+.B.up_chr3R:19591598:19591788:+@chr3R:19591852:19592029:+.B.dn'	(0,0):633,(0,1):540,(1,0):4,(1,1):795	0:9,1:1330	(0,0):339,(0,1):326,(1,0):47,(1,1):469	0:73,1:769	chr3R	+	1959159819591590	1959202919592020
251	CG6891	chrX:18670530:18670681:+@chrX:18674714:18675037:+	ri	0	0	0.01	0.06	0.05	0.08	-0.06	1000000000000	'chrX:18670530:18670681:+@chrX:18674714:18675037:+.A.withRI','chrX:18670530:18670681:+@chrX:18674714:18675037:+.B.up_chrX:18670530:18670681:+@chrX:18674714:18675037:+.B.dn'	(0,0):1077,(1,0):85,(1,1):1264	0:90,1:1259	(0,0):229,(1,0):167,(1,1):187	0:181,1:173	chrX	+	1867053018670530	1867503718675030
252	Hrb27C	chr2L:6924685:6925564:+@chr2L:6927981:6928092:+	ri	0.93	0.91	0.96	0.99	0.99	1	-0.06	1.5934e+09	'chr2L:6924685:6925564:+@chr2L:6927981:6928092:+.A.withRI','chr2L:6924685:6925564:+@chr2L:6927981:6928092:+.B.up_chr2L:6924685:6925564:+@chr2L:6927981:6928092:+.B.dn'	(0,0):831,(0,1):12,(1,0):10480,(1,1):3451	0:13723,1:220	(0,0):1339,(0,1):11,(1,0):20240,(1,1):4161	0:24379,1:33	chr2L	+	69246856924685	69280926928092
253	ATPsynE	chr3R:10152746:10152905|10152810:+@chr3R:10152975:10153473:+	a5ss	0.14	0.12	0.16	0.2	0.19	0.22	-0.06	53528.2	'chr3R:10152746:10152905|10152810:+@chr3R:10152975:10153473:+.A.coreAndExt_chr3R:10152746:10152905|10152810:+@chr3R:10152975:10153473:+.A.dn','chr3R:10152746:10152905|10152810:+@chr3R:10152975:10153473:+.B.core_chr3R:10152746:10152905|10152810:+@chr3R:10152975:10153473:+.B.dn'	(0,0):1384,(0,1):3,(1,0):196,(1,1):5585	0:1001,1:4783	(0,0):2872,(0,1):4,(1,0):544,(1,1):10411	0:2816,1:8143	chr3R	+	1015274610152740	1015347310153470
254	Rap1	chr3L:1862304:1862178|1861778:-@chr3L:1859105:1861676:-	a5ss	0.07	0.05	0.09	0.13	0.1	0.15	-0.06	32.02	'chr3L:1862304:1862178|1861778:-@chr3L:1859105:1861676:-.A.dn_chr3L:1862304:1862178|1861778:-@chr3L:1859105:1861676:-.A.coreAndExt','chr3L:1862304:1862178|1861778:-@chr3L:1859105:1861676:-.B.dn_chr3L:1862304:1862178|1861778:-@chr3L:1859105:1861676:-.B.core'	(0,0):305,(0,1):1,(1,0):38,(1,1):3649	0:325,1:3363	(0,0):1033,(0,1):4,(1,0):92,(1,1):4619	0:737,1:3978	chr3L	-	18591051859105	18623041862304
255	CG8399	chr2R:11905233:11905362:+@chr2R:11909351:11909881:+	ri	0.02	0.01	0.03	0.07	0.06	0.08	-0.05	1000000000000	'chr2R:11905233:11905362:+@chr2R:11909351:11909881:+.A.withRI','chr2R:11905233:11905362:+@chr2R:11909351:11909881:+.B.up_chr2R:11905233:11905362:+@chr2R:11909351:11909881:+.B.dn'	(0,0):36,(0,1):12,(1,0):25,(1,1):127	0:26,1:138	(0,0):123,(0,1):27,(1,0):280,(1,1):460	0:311,1:456	chr2R	+	1190523311905230	1190988111909880
256	Eip63E	chr3L:3600312:3600491:+@chr3L:3607502:3607677:+	ri	0.94	0.92	0.95	0.99	0.99	0.99	-0.05	1000000000000	'chr3L:3600312:3600491:+@chr3L:3607502:3607677:+.A.withRI','chr3L:3600312:3600491:+@chr3L:3607502:3607677:+.B.up_chr3L:3600312:3600491:+@chr3L:3607502:3607677:+.B.dn'	(0,0):1006,(0,1):55,(1,0):38318,(1,1):29	0:38345,1:57	(0,0):5724,(0,1):72,(1,0):309874,(1,1):46	0:309919,1:73	chr3L	+	36003123600312	36076773607677
257	CG2082, jagn	chr3R:1605005:1605238:+@chr3R:1605522:1605894:+	ri	0.01	0	0.02	0.06	0.05	0.08	-0.05	1000000000000	'chr3R:1605005:1605238:+@chr3R:1605522:1605894:+.A.withRI','chr3R:1605005:1605238:+@chr3R:1605522:1605894:+.B.up_chr3R:1605005:1605238:+@chr3R:1605522:1605894:+.B.dn'	(0,0):62,(0,1):323,(1,0):6,(1,1):339	0:8,1:660	(0,0):39,(0,1):313,(1,0):44,(1,1):259	0:60,1:556	chr3R	+	16050051605005	16058941605894
258	ChAT, CG7714	chr3R:14552065:14552368:-@chr3R:14551076:14551981:-	ri	0.01	0.01	0.01	0.06	0.06	0.07	-0.05	1000000000000	'chr3R:14552065:14552368:-@chr3R:14551076:14551981:-.A.withRI','chr3R:14552065:14552368:-@chr3R:14551076:14551981:-.B.dn_chr3R:14552065:14552368:-@chr3R:14551076:14551981:-.B.up'	(0,0):277,(0,1):1104,(1,0):24,(1,1):11313	0:127,1:12314	(0,0):1613,(0,1):2500,(1,0):392,(1,1):20144	0:1505,1:21531	chr3R	-	1455107614551070	1455236814552360
259	RpL15	chr3LHet:2398050:2398059:+@chr3LHet:2398128:2398454:+	ri	0.07	0.06	0.07	0.12	0.11	0.12	-0.05	1000000000000	'chr3LHet:2398050:2398059:+@chr3LHet:2398128:2398454:+.A.withRI','chr3LHet:2398050:2398059:+@chr3LHet:2398128:2398454:+.B.up_chr3LHet:2398050:2398059:+@chr3LHet:2398128:2398454:+.B.dn'	(0,0):4159,(1,0):759,(1,1):22825	0:2390,1:21194	(0,0):2996,(1,0):1443,(1,1):26752	0:4525,1:23670	chr3LHet	+	23980502398050	23984542398454
260	Rbp1	chr3R:6610279:6610645:+@chr3R:6611880:6612229:+	ri	0.06	0.06	0.07	0.11	0.09	0.12	-0.05	6.15974e+11	'chr3R:6610279:6610645:+@chr3R:6611880:6612229:+.A.withRI','chr3R:6610279:6610645:+@chr3R:6611880:6612229:+.B.up_chr3R:6610279:6610645:+@chr3R:6611880:6612229:+.B.dn'	(0,0):263,(0,1):357,(1,0):230,(1,1):993	0:284,1:1296	(0,0):320,(0,1):286,(1,0):281,(1,1):668	0:360,1:875	chr3R	+	66102796610279	66122296612229
261	Spn42Da	chr2R:2766350:2766428:-@chr2R:2764932:2765863:-	ri	0.06	0.05	0.08	0.11	0.09	0.13	-0.05	2138.85	'chr2R:2766350:2766428:-@chr2R:2764932:2765863:-.A.withRI','chr2R:2766350:2766428:-@chr2R:2764932:2765863:-.B.dn_chr2R:2766350:2766428:-@chr2R:2764932:2765863:-.B.up'	(0,0):341,(0,1):107,(1,0):93,(1,1):2175	0:219,1:2156	(0,0):457,(0,1):79,(1,0):152,(1,1):2085	0:372,1:1944	chr2R	-	27649322764932	27664282766428
262	mthl3	chr2R:13340068:13340078:-@chr2R:13338034:13338537:-	ri	0.06	0.05	0.08	0.11	0.1	0.13	-0.05	1161.51	'chr2R:13340068:13340078:-@chr2R:13338034:13338537:-.A.withRI','chr2R:13340068:13340078:-@chr2R:13338034:13338537:-.B.dn_chr2R:13340068:13340078:-@chr2R:13338034:13338537:-.B.up'	(0,0):153,(1,0):90,(1,1):299	0:106,1:283	(0,0):154,(1,0):235,(1,1):452	0:282,1:405	chr2R	-	1333803413338030	1334007813340070
263	CG17508	chr2R:1496109:1496287:+@chr2R:1496518:1496994:+	ri	0.08	0.07	0.09	0.13	0.11	0.15	-0.05	1022.45	'chr2R:1496109:1496287:+@chr2R:1496518:1496994:+.A.withRI','chr2R:1496109:1496287:+@chr2R:1496518:1496994:+.B.up_chr2R:1496109:1496287:+@chr2R:1496518:1496994:+.B.dn'	(0,0):962,(0,1):351,(1,0):156,(1,1):2680	0:355,1:2832	(0,0):449,(0,1):237,(1,0):153,(1,1):1567	0:372,1:1585	chr2R	+	14961091496109	14969941496994
264	Ect4	chr3L:8095370:8095430:+@chr3L:8095993:8097918:+	ri	0.02	0.01	0.04	0.07	0.06	0.09	-0.05	734.55	'chr3L:8095370:8095430:+@chr3L:8095993:8097918:+.A.withRI','chr3L:8095370:8095430:+@chr3L:8095993:8097918:+.B.up_chr3L:8095370:8095430:+@chr3L:8095993:8097918:+.B.dn'	(0,0):131,(1,0):12,(1,1):1820	0:73,1:1759	(0,0):273,(1,0):76,(1,1):3268	0:339,1:3005	chr3L	+	80953708095370	80979188097918
265	Rab9	chr2L:19432586:19433063:+@chr2L:19434667:19434861:+	ri	0.04	0.02	0.05	0.09	0.07	0.11	-0.05	41.1	'chr2L:19432586:19433063:+@chr2L:19434667:19434861:+.A.withRI','chr2L:19432586:19433063:+@chr2L:19434667:19434861:+.B.up_chr2L:19432586:19433063:+@chr2L:19434667:19434861:+.B.dn'	(0,0):45,(0,1):60,(1,0):27,(1,1):147	0:31,1:203	(0,0):53,(0,1):52,(1,0):66,(1,1):152	0:81,1:189	chr2L	+	1943258619432580	1943486119434860
266	AGO1	chr2R:9840554:9840622:-@chr2R:9837637:9838422:-	ri	0.04	0.03	0.06	0.09	0.07	0.12	-0.05	11.39	'chr2R:9840554:9840622:-@chr2R:9837637:9838422:-.A.withRI','chr2R:9840554:9840622:-@chr2R:9837637:9838422:-.B.dn_chr2R:9840554:9840622:-@chr2R:9837637:9838422:-.B.up'	(0,0):59,(1,0):30,(1,1):231	0:41,1:220	(0,0):93,(0,1):3,(1,0):65,(1,1):218	0:78,1:208	chr2R	-	98376379837637	98406229840622
267	Atg18a	chr3L:8180913:8181680:+@chr3L:8182387:8182545:+	ri	0.06	0.04	0.07	0.11	0.08	0.14	-0.05	11.28	'chr3L:8180913:8181680:+@chr3L:8182387:8182545:+.A.withRI','chr3L:8180913:8181680:+@chr3L:8182387:8182545:+.B.up_chr3L:8180913:8181680:+@chr3L:8182387:8182545:+.B.dn'	(0,0):132,(0,1):104,(1,0):47,(1,1):654	0:83,1:722	(0,0):105,(0,1):44,(1,0):58,(1,1):479	0:110,1:471	chr3L	+	81809138180913	81825458182545
268	ATPsynE	chr3R:10152746:10152910|10152810:+@chr3R:10152975:10153473:+	a5ss	0.08	0.06	0.09	0.13	0.12	0.15	-0.05	1000000000000	'chr3R:10152746:10152910|10152810:+@chr3R:10152975:10153473:+.A.coreAndExt_chr3R:10152746:10152910|10152810:+@chr3R:10152975:10153473:+.A.dn','chr3R:10152746:10152910|10152810:+@chr3R:10152975:10153473:+.B.core_chr3R:10152746:10152910|10152810:+@chr3R:10152975:10153473:+.B.dn'	(0,0):1464,(0,1):3,(1,0):116,(1,1):5585	0:488,1:5216	(0,0):3046,(0,1):4,(1,0):370,(1,1):10411	0:1688,1:9097	chr3R	+	1015274610152740	1015347310153470
269	Eip63E	chr3L:3600312:3607166|3600491:+@chr3L:3607502:3607677:+	a5ss	0.94	0.92	0.95	0.99	0.99	0.99	-0.05	1000000000000	'chr3L:3600312:3607166|3600491:+@chr3L:3607502:3607677:+.A.coreAndExt_chr3L:3600312:3607166|3600491:+@chr3L:3607502:3607677:+.A.dn','chr3L:3600312:3607166|3600491:+@chr3L:3607502:3607677:+.B.core_chr3L:3600312:3607166|3600491:+@chr3L:3607502:3607677:+.B.dn'	(0,0):1008,(0,1):55,(1,0):38316,(1,1):29	0:38345,1:55	(0,0):5725,(0,1):72,(1,0):309873,(1,1):46	0:309918,1:73	chr3L	+	36003123600312	36076773607677
270	Eip63E	chr3L:3600312:3607304|3600491:+@chr3L:3607502:3607677:+	a5ss	0.94	0.92	0.95	0.99	0.99	0.99	-0.05	1000000000000	'chr3L:3600312:3607304|3600491:+@chr3L:3607502:3607677:+.A.coreAndExt_chr3L:3600312:3607304|3600491:+@chr3L:3607502:3607677:+.A.dn','chr3L:3600312:3607304|3600491:+@chr3L:3607502:3607677:+.B.core_chr3L:3600312:3607304|3600491:+@chr3L:3607502:3607677:+.B.dn'	(0,0):1008,(0,1):55,(1,0):38316,(1,1):29	0:38344,1:56	(0,0):5725,(0,1):72,(1,0):309873,(1,1):46	0:309918,1:73	chr3L	+	36003123600312	36076773607677
271	Eip63E	chr3L:3600312:3607396|3600491:+@chr3L:3607502:3607677:+	a5ss	0.94	0.92	0.95	0.99	0.99	0.99	-0.05	1000000000000	'chr3L:3600312:3607396|3600491:+@chr3L:3607502:3607677:+.A.coreAndExt_chr3L:3600312:3607396|3600491:+@chr3L:3607502:3607677:+.A.dn','chr3L:3600312:3607396|3600491:+@chr3L:3607502:3607677:+.B.core_chr3L:3600312:3607396|3600491:+@chr3L:3607502:3607677:+.B.dn'	(0,0):1006,(0,1):55,(1,0):38318,(1,1):29	0:38343,1:59	(0,0):5725,(0,1):72,(1,0):309873,(1,1):46	0:309918,1:73	chr3L	+	36003123600312	36076773607677
272	CG9331	chr2L:20824450:20824493:+@chr2L:20825272:20825512:+@chr2L:20825668:20826087:+	se	0.05	0.04	0.06	0.1	0.09	0.11	-0.05	1000000000000	'chr2L:20824450:20824493:+@chr2L:20825272:20825512:+@chr2L:20825668:20826087:+.A.up_chr2L:20824450:20824493:+@chr2L:20825272:20825512:+@chr2L:20825668:20826087:+.A.se_chr2L:20824450:20824493:+@chr2L:20825272:20825512:+@chr2L:20825668:20826087:+.A.dn','chr2L:20824450:20824493:+@chr2L:20825272:20825512:+@chr2L:20825668:20826087:+.B.up_chr2L:20824450:20824493:+@chr2L:20825272:20825512:+@chr2L:208256…	(0,0):1652,(0,1):312,(1,0):142,(1,1):2330	0:257,1:2527	(0,0):5780,(0,1):306,(1,0):420,(1,1):3997	0:829,1:3894	chr2L	+	2082445020824450	2082608720826080
273	CG4019	chr2R:19496937:19497098:-@chr2R:19495655:19496204:-	ri	0.02	0.02	0.03	0.06	0.05	0.06	-0.04	1000000000000	'chr2R:19496937:19497098:-@chr2R:19495655:19496204:-.A.withRI','chr2R:19496937:19497098:-@chr2R:19495655:19496204:-.B.dn_chr2R:19496937:19497098:-@chr2R:19495655:19496204:-.B.up'	(0,0):588,(0,1):124,(1,0):82,(1,1):2125	0:132,1:2199	(0,0):762,(0,1):216,(1,0):292,(1,1):3300	0:498,1:3310	chr2R	-	1949565519495650	1949709819497090
274	CG8399	chr2R:11905233:11905306:+@chr2R:11909394:11909881:+	ri	0.02	0.01	0.03	0.06	0.06	0.07	-0.04	1000000000000	'chr2R:11905233:11905306:+@chr2R:11909394:11909881:+.A.withRI','chr2R:11905233:11905306:+@chr2R:11909394:11909881:+.B.up_chr2R:11905233:11905306:+@chr2R:11909394:11909881:+.B.dn'	(0,0):45,(0,1):3,(1,0):28,(1,1):124	0:28,1:127	(0,0):136,(0,1):14,(1,0):315,(1,1):425	0:342,1:412	chr2R	+	1190523311905230	1190988111909880
275	zetaCOP	chr3L:16665554:16665644:-@chr3L:16664764:16664942:-	ri	0.02	0.01	0.02	0.06	0.05	0.07	-0.04	1000000000000	'chr3L:16665554:16665644:-@chr3L:16664764:16664942:-.A.withRI','chr3L:16665554:16665644:-@chr3L:16664764:16664942:-.B.dn_chr3L:16665554:16665644:-@chr3L:16664764:16664942:-.B.up'	(0,0):269,(0,1):367,(1,0):67,(1,1):82	0:68,1:448	(0,0):194,(0,1):291,(1,0):183,(1,1):62	0:185,1:351	chr3L	-	1666476416664760	1666564416665640
276	Ect4	chr3L:8093067:8093135:+@chr3L:8095993:8097918:+	ri	0.02	0.02	0.03	0.06	0.05	0.06	-0.04	1000000000000	'chr3L:8093067:8093135:+@chr3L:8095993:8097918:+.A.withRI','chr3L:8093067:8093135:+@chr3L:8095993:8097918:+.B.up_chr3L:8093067:8093135:+@chr3L:8095993:8097918:+.B.dn'	(0,0):134,(1,0):71,(1,1):1820	0:126,1:1765	(0,0):266,(1,0):287,(1,1):3268	0:483,1:3072	chr3L	+	80930678093067	80979188097918
277	toc	chr2L:3080651:3080887:-@chr2L:3071569:3071764:-	ri	0.96	0.95	0.97	1	0.99	1	-0.04	1000000000000	'chr2L:3080651:3080887:-@chr2L:3071569:3071764:-.A.withRI','chr2L:3080651:3080887:-@chr2L:3071569:3071764:-.B.dn_chr2L:3080651:3080887:-@chr2L:3071569:3071764:-.B.up'	(0,0):1131,(0,1):44,(1,0):41755,(1,1):33	0:41787,1:45	(0,0):5778,(0,1):40,(1,0):335912,(1,1):31	0:335943,1:40	chr2L	-	30715693071569	30808873080887
278	Trp1	chr2L:10009916:10009983:+@chr2L:10010737:10011552:+	ri	0.04	0.03	0.05	0.08	0.07	0.08	-0.04	1000000000000	'chr2L:10009916:10009983:+@chr2L:10010737:10011552:+.A.withRI','chr2L:10009916:10009983:+@chr2L:10010737:10011552:+.B.up_chr2L:10009916:10009983:+@chr2L:10010737:10011552:+.B.dn'	(0,0):392,(1,0):84,(1,1):2093	0:150,1:2027	(0,0):611,(0,1):1,(1,0):252,(1,1):3086	0:501,1:2838	chr2L	+	1000991610009910	1001155210011550
279	AdipoR	chr3R:18372434:18372845:-@chr3R:18370840:18371192:-	ri	0.02	0.02	0.03	0.06	0.05	0.07	-0.04	1000000000000	'chr3R:18372434:18372845:-@chr3R:18370840:18371192:-.A.withRI','chr3R:18372434:18372845:-@chr3R:18370840:18371192:-.B.dn_chr3R:18372434:18372845:-@chr3R:18370840:18371192:-.B.up'	(0,0):1247,(0,1):36,(1,0):58,(1,1):1230	0:83,1:1241	(0,0):1124,(0,1):26,(1,0):152,(1,1):1149	0:233,1:1094	chr3R	-	1837084018370840	1837284518372840
280	His4r	chr3R:10451547:10451563:+@chr3R:10451748:10451951:+	ri	0.02	0.02	0.02	0.06	0.04	0.08	-0.04	1000000000000	'chr3R:10451547:10451563:+@chr3R:10451748:10451951:+.A.withRI','chr3R:10451547:10451563:+@chr3R:10451748:10451951:+.B.up_chr3R:10451547:10451563:+@chr3R:10451748:10451951:+.B.dn'	(0,0):3230,(0,1):9,(1,0):105,(1,1):1751	0:136,1:1729	(0,0):1102,(1,0):66,(1,1):375	0:87,1:354	chr3R	+	1045154710451540	1045195110451950
281	RpS14a	chrX:7827747:7827879:+@chrX:7828042:7828303:+	ri	0.01	0.01	0.01	0.05	0.04	0.06	-0.04	1000000000000	'chrX:7827747:7827879:+@chrX:7828042:7828303:+.A.withRI','chrX:7827747:7827879:+@chrX:7828042:7828303:+.B.up_chrX:7827747:7827879:+@chrX:7828042:7828303:+.B.dn'	(0,0):7574,(0,1):6,(1,0):64,(1,1):9218	0:149,1:9139	(0,0):3237,(0,1):11,(1,0):187,(1,1):4595	0:420,1:4373	chrX	+	78277477827747	78283037828303
282	RpL15	chr3LHet:2398050:2398052:+@chr3LHet:2398128:2398454:+	ri	0.06	0.06	0.06	0.1	0.09	0.11	-0.04	1000000000000	'chr3LHet:2398050:2398052:+@chr3LHet:2398128:2398454:+.A.withRI','chr3LHet:2398050:2398052:+@chr3LHet:2398128:2398454:+.B.up_chr3LHet:2398050:2398052:+@chr3LHet:2398128:2398454:+.B.dn'	(0,0):4159,(1,0):759,(1,1):22825	0:2214,1:21370	(0,0):2996,(1,0):1443,(1,1):26752	0:4103,1:24092	chr3LHet	+	23980502398050	23984542398454
283	whd	chr2R:6359123:6359461:-@chr2R:6357873:6358254:-	ri	0.03	0.03	0.04	0.07	0.06	0.09	-0.04	6176.27	'chr2R:6359123:6359461:-@chr2R:6357873:6358254:-.A.withRI','chr2R:6359123:6359461:-@chr2R:6357873:6358254:-.B.dn_chr2R:6359123:6359461:-@chr2R:6357873:6358254:-.B.up'	(0,0):542,(0,1):55,(1,0):48,(1,1):784	0:72,1:815	(0,0):704,(0,1):65,(1,0):99,(1,1):736	0:154,1:746	chr2R	-	63578736357873	63594616359461
284	CG11652	chr3L:11689975:11690086:-@chr3L:11687910:11688678:-	ri	0.02	0.01	0.02	0.06	0.04	0.08	-0.04	4439.46	'chr3L:11689975:11690086:-@chr3L:11687910:11688678:-.A.withRI','chr3L:11689975:11690086:-@chr3L:11687910:11688678:-.B.dn_chr3L:11689975:11690086:-@chr3L:11687910:11688678:-.B.up'	(0,0):271,(0,1):143,(1,0):57,(1,1):1376	0:85,1:1491	(0,0):99,(0,1):61,(1,0):48,(1,1):329	0:78,1:360	chr3L	-	1168791011687910	1169008611690080
285	RpL10Ab	chr3L:11815955:11815990:+@chr3L:11816300:11816665:+@chr3L:11816758:11817314:+	se	0.26	0.25	0.27	0.3	0.29	0.31	-0.04	1000000000000	'chr3L:11815955:11815990:+@chr3L:11816300:11816665:+@chr3L:11816758:11817314:+.A.up_chr3L:11815955:11815990:+@chr3L:11816300:11816665:+@chr3L:11816758:11817314:+.A.se_chr3L:11815955:11815990:+@chr3L:11816300:11816665:+@chr3L:11816758:11817314:+.A.dn','chr3L:11815955:11815990:+@chr3L:11816300:11816665:+@chr3L:11816758:11817314:+.B.up_chr3L:11815955:11815990:+@chr3L:11816300:11816665:+@chr3L:118167…	(0,0):15384,(0,1):2,(1,0):7064,(1,1):29315	0:14599,1:21782	(0,0):8143,(1,0):6215,(1,1):22520	0:12792,1:15943	chr3L	+	1181595511815950	1181731411817310
286	CG2233	chrX:7930933:7931245:-@chrX:7930759:7930835:-@chrX:7930253:7930603:-	se	0.94	0.93	0.95	0.98	0.95	0.99	-0.04	0.57	'chrX:7930933:7931245:-@chrX:7930759:7930835:-@chrX:7930253:7930603:-.A.dn_chrX:7930933:7931245:-@chrX:7930759:7930835:-@chrX:7930253:7930603:-.A.se_chrX:7930933:7931245:-@chrX:7930759:7930835:-@chrX:7930253:7930603:-.A.up','chrX:7930933:7931245:-@chrX:7930759:7930835:-@chrX:7930253:7930603:-.B.dn_chrX:7930933:7931245:-@chrX:7930759:7930835:-@chrX:7930253:7930603:-.B.up'	(0,0):13187,(0,1):45,(1,0):4092,(1,1):12402	0:15741,1:798	(0,0):700,(0,1):2,(1,0):318,(1,1):682	0:979,1:23	chrX	-	79302537930253	79312457931245
287	CG3209	chr2R:19957523:19957765:+@chr2R:19958291:19958291:+@chr2R:19959518:19959518:+@chr2R:19960228:19960484:+	mxe	0.93	0.91	0.94	0.97	0.96	0.98	-0.04	1000000000000	'chr2R:19957523:19957765:+@chr2R:19958291:19958291:+@chr2R:19959518:19959518:+@chr2R:19960228:19960484:+.A.up_chr2R:19957523:19957765:+@chr2R:19958291:19958291:+@chr2R:19959518:19959518:+@chr2R:19960228:19960484:+.A.mxe1_chr2R:19957523:19957765:+@chr2R:19958291:19958291:+@chr2R:19959518:19959518:+@chr2R:19960228:19960484:+.A.dn','chr2R:19957523:19957765:+@chr2R:19958291:19958291:+@chr2R:19959518:…	(0,0):781,(0,1):125,(1,0):1606,(1,1):1086	0:2642,1:175	(0,0):860,(0,1):52,(1,0):1688,(1,1):685	0:2347,1:78	chr2R	+	1995752319957520	1996048419960480
288	CG42336	chr2R:7182999:7183348:-@chr2R:7182047:7182290:-	ri	0.06	0.05	0.07	0.09	0.08	0.1	-0.03	1000000000000	'chr2R:7182999:7183348:-@chr2R:7182047:7182290:-.A.withRI','chr2R:7182999:7183348:-@chr2R:7182047:7182290:-.B.dn_chr2R:7182999:7183348:-@chr2R:7182047:7182290:-.B.up'	(0,0):1151,(0,1):986,(1,0):445,(1,1):2568	0:570,1:3429	(0,0):1021,(0,1):661,(1,0):548,(1,1):2417	0:763,1:2863	chr2R	-	71820477182047	71833487183348
289	CG10737	chr2R:15052965:15053033:+@chr2R:15058123:15058666:+	ri	0	0	0.01	0.03	0.02	0.03	-0.03	1000000000000	'chr2R:15052965:15053033:+@chr2R:15058123:15058666:+.A.withRI','chr2R:15052965:15053033:+@chr2R:15058123:15058666:+.B.up_chr2R:15052965:15053033:+@chr2R:15058123:15058666:+.B.dn'	(0,0):70,(1,0):6,(1,1):187	0:6,1:187	(0,0):219,(0,1):2,(1,0):121,(1,1):385	0:136,1:372	chr2R	+	1505296515052960	1505866615058660
290	CG8399	chr2R:11905233:11905362:+@chr2R:11909394:11909881:+	ri	0.02	0.01	0.02	0.05	0.05	0.06	-0.03	1000000000000	'chr2R:11905233:11905362:+@chr2R:11909394:11909881:+.A.withRI','chr2R:11905233:11905362:+@chr2R:11909394:11909881:+.B.up_chr2R:11905233:11905362:+@chr2R:11909394:11909881:+.B.dn'	(0,0):9,(0,1):39,(1,0):25,(1,1):127	0:25,1:166	(0,0):44,(0,1):106,(1,0):287,(1,1):453	0:317,1:529	chr2R	+	1190523311905230	1190988111909880
291	Roc2, Tret1-1	chr2R:7558535:7558685:+@chr2R:7560222:7560347:+	ri	0.01	0	0.01	0.04	0.03	0.05	-0.03	1000000000000	'chr2R:7558535:7558685:+@chr2R:7560222:7560347:+.A.withRI','chr2R:7558535:7558685:+@chr2R:7560222:7560347:+.B.up_chr2R:7558535:7558685:+@chr2R:7560222:7560347:+.B.dn'	(0,0):156,(0,1):169,(1,0):22,(1,1):27	0:22,1:196	(0,0):132,(0,1):113,(1,0):94,(1,1):20	0:94,1:133	chr2R	+	75585357558535	75603477560347
292	CG5773	chr2R:13931019:13931311:-@chr2R:13930409:13930926:-	ri	0.01	0	0.01	0.04	0.03	0.05	-0.03	1000000000000	'chr2R:13931019:13931311:-@chr2R:13930409:13930926:-.A.withRI','chr2R:13931019:13931311:-@chr2R:13930409:13930926:-.B.dn_chr2R:13931019:13931311:-@chr2R:13930409:13930926:-.B.up'	(0,0):354,(0,1):2124,(1,0):33,(1,1):7205	0:61,1:9301	(0,0):125,(0,1):692,(1,0):70,(1,1):4202	0:231,1:4733	chr2R	-	1393040913930400	1393131113931310
293	fbp	chr2L:19763426:19763485:-@chr2L:19762488:19762814:-	ri	0.03	0.03	0.04	0.06	0.06	0.07	-0.03	1000000000000	'chr2L:19763426:19763485:-@chr2L:19762488:19762814:-.A.withRI','chr2L:19763426:19763485:-@chr2L:19762488:19762814:-.B.dn_chr2L:19763426:19763485:-@chr2L:19762488:19762814:-.B.up'	(0,0):945,(0,1):5,(1,0):114,(1,1):1074	0:156,1:1037	(0,0):1131,(0,1):6,(1,0):222,(1,1):1094	0:291,1:1031	chr2L	-	1976248819762480	1976348519763480
294	RpS26	chr2L:18443153:18443200:-@chr2L:18442505:18443073:-	ri	0	0	0	0.03	0.03	0.04	-0.03	1000000000000	'chr2L:18443153:18443200:-@chr2L:18442505:18443073:-.A.withRI','chr2L:18443153:18443200:-@chr2L:18442505:18443073:-.B.dn_chr2L:18443153:18443200:-@chr2L:18442505:18443073:-.B.up'	(0,0):13805,(0,1):131,(1,0):17,(1,1):32965	0:107,1:33006	(0,0):14955,(0,1):138,(1,0):222,(1,1):35414	0:1391,1:34383	chr2L	-	1844250518442500	1844320018443200
295	Ald	chr3R:22082655:22082854:-@chr3R:22080805:22081153:-	ri	0.14	0.14	0.15	0.17	0.17	0.18	-0.03	1000000000000	'chr3R:22082655:22082854:-@chr3R:22080805:22081153:-.A.withRI','chr3R:22082655:22082854:-@chr3R:22080805:22081153:-.B.dn_chr3R:22082655:22082854:-@chr3R:22080805:22081153:-.B.up'	(0,0):4658,(0,1):2018,(1,0):3776,(1,1):3211	0:4230,1:4775	(0,0):7003,(0,1):1967,(1,0):5500,(1,1):4673	0:6301,1:5839	chr3R	-	2208080522080800	2208285422082850
296	wdb	chr3R:23407724:23407937:-@chr3R:23394001:23394313:-	ri	0.01	0.01	0.01	0.04	0.03	0.04	-0.03	1000000000000	'chr3R:23407724:23407937:-@chr3R:23394001:23394313:-.A.withRI','chr3R:23407724:23407937:-@chr3R:23394001:23394313:-.B.dn_chr3R:23407724:23407937:-@chr3R:23394001:23394313:-.B.up'	(0,0):129,(0,1):89,(1,0):121,(1,1):198	0:122,1:286	(0,0):216,(0,1):91,(1,0):558,(1,1):301	0:567,1:383	chr3R	-	2339400123394000	2340793723407930
297	AdipoR	chr3R:18372434:18372845:-@chr3R:18371407:18371505:-	ri	0.01	0.01	0.02	0.04	0.04	0.05	-0.03	1000000000000	'chr3R:18372434:18372845:-@chr3R:18371407:18371505:-.A.withRI','chr3R:18372434:18372845:-@chr3R:18371407:18371505:-.B.dn_chr3R:18372434:18372845:-@chr3R:18371407:18371505:-.B.up'	(0,0):361,(0,1):396,(1,0):37,(1,1):494	0:39,1:888	(0,0):245,(0,1):436,(1,0):117,(1,1):301	0:127,1:727	chr3R	-	1837140718371400	1837284518372840
298	wdb	chr3R:23407716:23407937:-@chr3R:23394001:23394313:-	ri	0.01	0.01	0.02	0.04	0.04	0.05	-0.03	1000000000000	'chr3R:23407716:23407937:-@chr3R:23394001:23394313:-.A.withRI','chr3R:23407716:23407937:-@chr3R:23394001:23394313:-.B.dn_chr3R:23407716:23407937:-@chr3R:23394001:23394313:-.B.up'	(0,0):185,(0,1):33,(1,0):120,(1,1):199	0:123,1:229	(0,0):273,(0,1):34,(1,0):557,(1,1):302	0:573,1:320	chr3R	-	2339400123394000	2340793723407930
299	Atpalpha	chr3R:16783486:16783889:+@chr3R:16786448:16786547:+	ri	0	0	0.01	0.03	0.02	0.03	-0.03	1000000000000	'chr3R:16783486:16783889:+@chr3R:16786448:16786547:+.A.withRI','chr3R:16783486:16783889:+@chr3R:16786448:16786547:+.B.up_chr3R:16783486:16783889:+@chr3R:16786448:16786547:+.B.dn'	(0,0):260,(0,1):10,(1,0):14,(1,1):445	0:15,1:454	(0,0):496,(0,1):22,(1,0):93,(1,1):425	0:111,1:429	chr3R	+	1678348616783480	1678654716786540
300	Mlp84B, Alh	chr3R:2943373:2943496:-@chr3R:2939249:2941560:-	ri	0.01	0	0.01	0.04	0.04	0.05	-0.03	1000000000000	'chr3R:2943373:2943496:-@chr3R:2939249:2941560:-.A.withRI','chr3R:2943373:2943496:-@chr3R:2939249:2941560:-.B.dn_chr3R:2943373:2943496:-@chr3R:2939249:2941560:-.B.up'	(0,0):344,(0,1):407,(1,0):44,(1,1):9727	0:88,1:10090	(0,0):562,(0,1):610,(1,0):547,(1,1):13865	0:1207,1:13815	chr3R	-	29392492939249	29434962943496
301	RhoL	chr3R:5328097:5328387:-@chr3R:5323602:5323886:-	ri	0.01	0.01	0.01	0.04	0.04	0.05	-0.03	1000000000000	'chr3R:5328097:5328387:-@chr3R:5323602:5323886:-.A.withRI','chr3R:5328097:5328387:-@chr3R:5323602:5323886:-.B.dn_chr3R:5328097:5328387:-@chr3R:5323602:5323886:-.B.up'	(0,0):126,(0,1):306,(1,0):98,(1,1):522	0:102,1:824	(0,0):105,(0,1):353,(1,0):417,(1,1):546	0:435,1:881	chr3R	-	53236025323602	53283875328387
302	RpL15	chr3LHet:2397802:2397858:+@chr3LHet:2398128:2398454:+	ri	0.03	0.03	0.03	0.06	0.06	0.07	-0.03	1000000000000	'chr3LHet:2397802:2397858:+@chr3LHet:2398128:2398454:+.A.withRI','chr3LHet:2397802:2397858:+@chr3LHet:2398128:2398454:+.B.up_chr3LHet:2397802:2397858:+@chr3LHet:2398128:2398454:+.B.dn'	(0,0):4176,(0,1):12,(1,0):969,(1,1):22825	0:1624,1:22182	(0,0):2800,(0,1):15,(1,0):2401,(1,1):26752	0:4147,1:25021	chr3LHet	+	23978022397802	23984542398454
303	RpL15	chr3LHet:2397802:2397840:+@chr3LHet:2398128:2398454:+	ri	0.02	0.02	0.03	0.05	0.05	0.06	-0.03	1000000000000	'chr3LHet:2397802:2397840:+@chr3LHet:2398128:2398454:+.A.withRI','chr3LHet:2397802:2397840:+@chr3LHet:2398128:2398454:+.B.up_chr3LHet:2397802:2397840:+@chr3LHet:2398128:2398454:+.B.dn'	(0,0):4188,(1,0):969,(1,1):22825	0:1571,1:22223	(0,0):2808,(0,1):7,(1,0):2401,(1,1):26752	0:3826,1:25334	chr3LHet	+	23978022397802	23984542398454
304	CG3566	chrX:6170261:6170329:-@chrX:6169003:6169203:-	ri	0.02	0.02	0.03	0.05	0.04	0.06	-0.03	2.77969e+10	'chrX:6170261:6170329:-@chrX:6169003:6169203:-.A.withRI','chrX:6170261:6170329:-@chrX:6169003:6169203:-.B.dn_chrX:6170261:6170329:-@chrX:6169003:6169203:-.B.up'	(0,0):163,(0,1):178,(1,0):82,(1,1):125	0:86,1:299	(0,0):96,(0,1):100,(1,0):137,(1,1):112	0:144,1:205	chrX	-	61690036169003	61703296170329
305	Actn	chrX:1936080:1936304:-@chrX:1924476:1924892:-	ri	0.09	0.08	0.1	0.12	0.11	0.13	-0.03	214149	'chrX:1936080:1936304:-@chrX:1924476:1924892:-.A.withRI','chrX:1936080:1936304:-@chrX:1924476:1924892:-.B.dn_chrX:1936080:1936304:-@chrX:1924476:1924892:-.B.up'	(0,0):695,(1,0):1460,(1,1):654	0:1516,1:598	(0,0):2349,(1,0):3512,(1,1):1205	0:3656,1:1061	chrX	-	19244761924476	19363041936304
306	cact	chr2L:16325494:16325740:-@chr2L:16324333:16325054:-	ri	0.02	0.01	0.03	0.05	0.04	0.06	-0.03	21460.2	'chr2L:16325494:16325740:-@chr2L:16324333:16325054:-.A.withRI','chr2L:16325494:16325740:-@chr2L:16324333:16325054:-.B.dn_chr2L:16325494:16325740:-@chr2L:16324333:16325054:-.B.up'	(0,0):44,(0,1):166,(1,0):10,(1,1):771	0:24,1:923	(0,0):113,(0,1):428,(1,0):90,(1,1):1901	0:184,1:2235	chr2L	-	1632433316324330	1632574016325740
307	Hel25E	chr2L:5540972:5541090:-@chr2L:5540169:5540300:-	ri	0.04	0.03	0.05	0.07	0.06	0.08	-0.03	12843	'chr2L:5540972:5541090:-@chr2L:5540169:5540300:-.A.withRI','chr2L:5540972:5541090:-@chr2L:5540169:5540300:-.B.dn_chr2L:5540972:5541090:-@chr2L:5540169:5540300:-.B.up'	(0,0):388,(0,1):266,(1,0):123,(1,1):21	0:124,1:286	(0,0):232,(0,1):307,(1,0):242,(1,1):14	0:242,1:321	chr2L	-	55401695540169	55410905541090
308	Hrb27C	chr2L:6924685:6925558:+@chr2L:6927981:6928092:+	ri	0.96	0.93	0.98	0.99	0.99	1	-0.03	32.85	'chr2L:6924685:6925558:+@chr2L:6927981:6928092:+.A.withRI','chr2L:6924685:6925558:+@chr2L:6927981:6928092:+.B.up_chr2L:6924685:6925558:+@chr2L:6927981:6928092:+.B.dn'	(0,0):837,(0,1):6,(1,0):10543,(1,1):3388	0:13716,1:221	(0,0):1340,(0,1):10,(1,0):20369,(1,1):4032	0:24380,1:31	chr2L	+	69246856924685	69280926928092
309	SPARC	chr3R:22697767:22697648|22697414:-@chr3R:22695915:22696094:-	a5ss	0	0	0	0.03	0.02	0.04	-0.03	1000000000000	'chr3R:22697767:22697648|22697414:-@chr3R:22695915:22696094:-.A.dn_chr3R:22697767:22697648|22697414:-@chr3R:22695915:22696094:-.A.coreAndExt','chr3R:22697767:22697648|22697414:-@chr3R:22695915:22696094:-.B.dn_chr3R:22697767:22697648|22697414:-@chr3R:22695915:22696094:-.B.core'	(0,0):697,(0,1):813,(1,0):4,(1,1):345	0:4,1:1158	(0,0):1922,(0,1):794,(1,0):103,(1,1):484	0:119,1:1262	chr3R	-	2269591522695910	2269776722697760
310	Mpcp	chr3L:14530782:14530934|14530802:+@chr3L:14531104:14531521:+	a5ss	0.02	0.01	0.02	0.05	0.04	0.05	-0.03	1000000000000	'chr3L:14530782:14530934|14530802:+@chr3L:14531104:14531521:+.A.coreAndExt_chr3L:14530782:14530934|14530802:+@chr3L:14531104:14531521:+.A.dn','chr3L:14530782:14530934|14530802:+@chr3L:14531104:14531521:+.B.core_chr3L:14530782:14530934|14530802:+@chr3L:14531104:14531521:+.B.dn'	(0,0):1721,(0,1):826,(1,0):57,(1,1):4257	0:120,1:5020	(0,0):2876,(0,1):1961,(1,0):313,(1,1):6326	0:593,1:8007	chr3L	+	1453078214530780	1453152114531520
311	ND-MNLL	chrX:7787837:7787783|7787621:-@chrX:7787086:7787449:-	a5ss	0.03	0.02	0.04	0.06	0.05	0.07	-0.03	57.12	'chrX:7787837:7787783|7787621:-@chrX:7787086:7787449:-.A.dn_chrX:7787837:7787783|7787621:-@chrX:7787086:7787449:-.A.coreAndExt','chrX:7787837:7787783|7787621:-@chrX:7787086:7787449:-.B.dn_chrX:7787837:7787783|7787621:-@chrX:7787086:7787449:-.B.core'	(0,0):1357,(0,1):69,(1,0):31,(1,1):1457	0:74,1:1483	(0,0):3158,(0,1):73,(1,0):126,(1,1):3043	0:286,1:2956	chrX	-	77870867787086	77878377787837
312	Argk	chr3L:9057564:9057617:-@chr3L:9055007:9055567:-@chr3L:9043148:9043459:-	se	0.02	0.02	0.02	0.05	0.05	0.06	-0.03	1000000000000	'chr3L:9057564:9057617:-@chr3L:9055007:9055567:-@chr3L:9043148:9043459:-.A.dn_chr3L:9057564:9057617:-@chr3L:9055007:9055567:-@chr3L:9043148:9043459:-.A.se_chr3L:9057564:9057617:-@chr3L:9055007:9055567:-@chr3L:9043148:9043459:-.A.up','chr3L:9057564:9057617:-@chr3L:9055007:9055567:-@chr3L:9043148:9043459:-.B.dn_chr3L:9057564:9057617:-@chr3L:9055007:9055567:-@chr3L:9043148:9043459:-.B.up'	(0,0):12047,(0,1):5,(1,0):857,(1,1):12958	0:1072,1:12748	(0,0):11328,(0,1):10,(1,0):1644,(1,1):9365	0:2171,1:8848	chr3L	-	90431489043148	90576179057617
313	wal	chr2R:7578044:7578091:-@chr2R:7576305:7577393:-	ri	0.02	0.02	0.02	0.04	0.03	0.04	-0.02	1000000000000	'chr2R:7578044:7578091:-@chr2R:7576305:7577393:-.A.withRI','chr2R:7578044:7578091:-@chr2R:7576305:7577393:-.B.dn_chr2R:7578044:7578091:-@chr2R:7576305:7577393:-.B.up'	(0,0):2296,(1,0):114,(1,1):8218	0:259,1:8073	(0,0):2866,(0,1):1,(1,0):263,(1,1):10550	0:643,1:10171	chr2R	-	75763057576305	75780917578091
314	CG8468	chr2R:10107405:10107547:+@chr2R:10114916:10116800:+	ri	0.02	0.02	0.02	0.04	0.03	0.04	-0.02	1000000000000	'chr2R:10107405:10107547:+@chr2R:10114916:10116800:+.A.withRI','chr2R:10107405:10107547:+@chr2R:10114916:10116800:+.B.up_chr2R:10107405:10107547:+@chr2R:10114916:10116800:+.B.dn'	(0,0):797,(0,1):11,(1,0):282,(1,1):3296	0:360,1:3229	(0,0):1773,(0,1):25,(1,0):763,(1,1):5352	0:958,1:5182	chr2R	+	1010740510107400	1011680010116800
315	CG3808, CG18135	chr3L:18991101:18991383:-@chr3L:18983122:18985825:-	ri	0.05	0.04	0.05	0.07	0.06	0.08	-0.02	1000000000000	'chr3L:18991101:18991383:-@chr3L:18983122:18985825:-.A.withRI','chr3L:18991101:18991383:-@chr3L:18983122:18985825:-.B.dn_chr3L:18991101:18991383:-@chr3L:18983122:18985825:-.B.up'	(0,0):613,(0,1):37,(1,0):812,(1,1):9206	0:1312,1:8743	(0,0):327,(0,1):24,(1,0):582,(1,1):4390	0:897,1:4099	chr3L	-	1898312218983120	1899138318991380
316	fbp	chr2L:19764070:19764120:-@chr2L:19762488:19762814:-	ri	0.02	0.02	0.02	0.04	0.03	0.04	-0.02	1000000000000	'chr2L:19764070:19764120:-@chr2L:19762488:19762814:-.A.withRI','chr2L:19764070:19764120:-@chr2L:19762488:19762814:-.B.dn_chr2L:19764070:19764120:-@chr2L:19762488:19762814:-.B.up'	(0,0):1032,(0,1):77,(1,0):147,(1,1):1074	0:164,1:1134	(0,0):1263,(0,1):72,(1,0):279,(1,1):1094	0:308,1:1137	chr2L	-	1976248819762480	1976412019764120
317	SclA, SclB	chr2L:16839213:16839355:+@chr2L:16840270:16840578:+	ri	0.03	0.02	0.03	0.05	0.05	0.06	-0.02	1000000000000	'chr2L:16839213:16839355:+@chr2L:16840270:16840578:+.A.withRI','chr2L:16839213:16839355:+@chr2L:16840270:16840578:+.B.up_chr2L:16839213:16839355:+@chr2L:16840270:16840578:+.B.dn'	(0,0):1005,(0,1):420,(1,0):118,(1,1):719	0:136,1:1121	(0,0):2725,(0,1):1434,(1,0):777,(1,1):2149	0:893,1:3467	chr2L	+	1683921316839210	1684057816840570
318	CG1544	chr3R:27022639:27022857:+@chr3R:27024893:27025010:+	ri	0.01	0.01	0.01	0.03	0.03	0.04	-0.02	1000000000000	'chr3R:27022639:27022857:+@chr3R:27024893:27025010:+.A.withRI','chr3R:27022639:27022857:+@chr3R:27024893:27025010:+.B.up_chr3R:27022639:27022857:+@chr3R:27024893:27025010:+.B.dn'	(0,0):56,(0,1):133,(1,0):33,(1,1):79	0:33,1:212	(0,0):111,(0,1):250,(1,0):175,(1,1):87	0:177,1:335	chr3R	+	2702263927022630	2702501027025010
319	Atpalpha	chr3R:16783486:16783889:+@chr3R:16787937:16788017:+	ri	0	0	0.01	0.02	0.02	0.03	-0.02	1000000000000	'chr3R:16783486:16783889:+@chr3R:16787937:16788017:+.A.withRI','chr3R:16783486:16783889:+@chr3R:16787937:16788017:+.B.up_chr3R:16783486:16783889:+@chr3R:16787937:16788017:+.B.dn'	(0,0):349,(0,1):1,(1,0):22,(1,1):445	0:23,1:445	(0,0):569,(0,1):2,(1,0):124,(1,1):425	0:128,1:423	chr3R	+	1678348616783480	1678801716788010
320	Atpalpha	chr3R:16783486:16783889:+@chr3R:16785071:16785102:+	ri	0	0	0.01	0.02	0.02	0.03	-0.02	1000000000000	'chr3R:16783486:16783889:+@chr3R:16785071:16785102:+.A.withRI','chr3R:16783486:16783889:+@chr3R:16785071:16785102:+.B.up_chr3R:16783486:16783889:+@chr3R:16785071:16785102:+.B.dn'	(0,0):235,(1,0):7,(1,1):445	0:10,1:442	(0,0):453,(1,0):46,(1,1):425	0:62,1:409	chr3R	+	1678348616783480	1678510216785100
321	Fer1HCH	chr3R:26213497:26213534:-@chr3R:26212041:26212318:-	ri	0.04	0.03	0.04	0.06	0.06	0.07	-0.02	1000000000000	'chr3R:26213497:26213534:-@chr3R:26212041:26212318:-.A.withRI','chr3R:26213497:26213534:-@chr3R:26212041:26212318:-.B.dn_chr3R:26213497:26213534:-@chr3R:26212041:26212318:-.B.up'	(0,0):18798,(0,1):2,(1,0):2978,(1,1):8569	0:3272,1:8277	(0,0):7558,(1,0):2233,(1,1):3723	0:2473,1:3483	chr3R	-	2621204126212040	2621353426213530
322	Fim	chrX:17189086:17189491:-@chrX:17181960:17183070:-	ri	0.04	0.04	0.05	0.06	0.06	0.07	-0.02	1000000000000	'chrX:17189086:17189491:-@chrX:17181960:17183070:-.A.withRI','chrX:17189086:17189491:-@chrX:17181960:17183070:-.B.dn_chrX:17189086:17189491:-@chrX:17181960:17183070:-.B.up'	(0,0):508,(1,0):380,(1,1):2035	0:445,1:1970	(0,0):879,(1,0):795,(1,1):2766	0:983,1:2578	chrX	-	1718196017181960	1718949117189490
323	Gclc	chrX:8010025:8010154:-@chrX:7999301:7999927:-	ri	0.01	0.01	0.01	0.03	0.03	0.04	-0.02	1000000000000	'chrX:8010025:8010154:-@chrX:7999301:7999927:-.A.withRI','chrX:8010025:8010154:-@chrX:7999301:7999927:-.B.dn_chrX:8010025:8010154:-@chrX:7999301:7999927:-.B.up'	(0,0):325,(0,1):4,(1,0):119,(1,1):630	0:123,1:630	(0,0):773,(0,1):44,(1,0):651,(1,1):1008	0:687,1:1016	chrX	-	79993017999301	80101548010154
324	CG6891	chrX:18669142:18669662:+@chrX:18674714:18675037:+	ri	0	0	0	0.02	0.01	0.02	-0.02	1000000000000	'chrX:18669142:18669662:+@chrX:18674714:18675037:+.A.withRI','chrX:18669142:18669662:+@chrX:18674714:18675037:+.B.up_chrX:18669142:18669662:+@chrX:18674714:18675037:+.B.dn'	(0,0):637,(0,1):2177,(1,0):95,(1,1):6776	0:102,1:8946	(0,0):153,(0,1):318,(1,0):171,(1,1):1102	0:197,1:1394	chrX	+	1866914218669140	1867503718675030
325	Rfabg	chr4:1093787:1094007:+@chr4:1094065:1096183:+	ri	0.01	0.01	0.01	0.03	0.03	0.04	-0.02	1000000000000	'chr4:1093787:1094007:+@chr4:1094065:1096183:+.A.withRI','chr4:1093787:1094007:+@chr4:1094065:1096183:+.B.up_chr4:1093787:1094007:+@chr4:1094065:1096183:+.B.dn'	(0,0):5164,(0,1):3020,(1,0):56,(1,1):87448	0:935,1:89589	(0,0):3556,(0,1):1891,(1,0):120,(1,1):55439	0:1746,1:55704	chr4	+	10937871093787	10961831096183
326	RpL15	chr3LHet:2397802:2397819:+@chr3LHet:2398128:2398454:+	ri	0.02	0.02	0.02	0.04	0.04	0.04	-0.02	1000000000000	'chr3LHet:2397802:2397819:+@chr3LHet:2398128:2398454:+.A.withRI','chr3LHet:2397802:2397819:+@chr3LHet:2398128:2398454:+.B.up_chr3LHet:2397802:2397819:+@chr3LHet:2398128:2398454:+.B.dn'	(0,0):2798,(0,1):1390,(1,0):969,(1,1):22825	0:1369,1:23815	(0,0):897,(0,1):1918,(1,0):2401,(1,1):26752	0:3408,1:27663	chr3LHet	+	23978022397802	23984542398454
327	Atpalpha	chr3R:16783486:16783889:+@chr3R:16784959:16785012:+	ri	0	0	0.01	0.02	0.02	0.03	-0.02	9.93821e+11	'chr3R:16783486:16783889:+@chr3R:16784959:16785012:+.A.withRI','chr3R:16783486:16783889:+@chr3R:16784959:16785012:+.B.up_chr3R:16783486:16783889:+@chr3R:16784959:16785012:+.B.dn'	(0,0):216,(0,1):8,(1,0):5,(1,1):445	0:9,1:449	(0,0):417,(0,1):5,(1,0):42,(1,1):425	0:49,1:423	chr3R	+	1678348616783480	1678501216785010
328	ND-MNLL	chrX:7787783:7787837:-@chrX:7787086:7787523:-	ri	0.02	0.02	0.03	0.04	0.04	0.05	-0.02	5.67644e+07	'chrX:7787783:7787837:-@chrX:7787086:7787523:-.A.withRI','chrX:7787783:7787837:-@chrX:7787086:7787523:-.B.dn_chrX:7787783:7787837:-@chrX:7787086:7787523:-.B.up'	(0,0):178,(0,1):431,(1,0):62,(1,1):2243	0:103,1:2633	(0,0):285,(0,1):1117,(1,0):264,(1,1):4734	0:460,1:5655	chrX	-	77870867787086	77878377787837
329	hts	chr2R:15312328:15312395:-@chr2R:15311099:15311302:-	ri	0.01	0.01	0.02	0.03	0.03	0.04	-0.02	99319.4	'chr2R:15312328:15312395:-@chr2R:15311099:15311302:-.A.withRI','chr2R:15312328:15312395:-@chr2R:15311099:15311302:-.B.dn_chr2R:15312328:15312395:-@chr2R:15311099:15311302:-.B.up'	(0,0):88,(0,1):92,(1,0):22,(1,1):76	0:24,1:166	(0,0):261,(0,1):131,(1,0):89,(1,1):78	0:94,1:204	chr2R	-	1531109915311090	1531239515312390
330	CG44245	chr2R:17089785:17089853:+@chr2R:17092118:17092428:+	ri	0.01	0.01	0.02	0.03	0.02	0.03	-0.02	158.64	'chr2R:17089785:17089853:+@chr2R:17092118:17092428:+.A.withRI','chr2R:17089785:17089853:+@chr2R:17092118:17092428:+.B.up_chr2R:17089785:17089853:+@chr2R:17092118:17092428:+.B.dn'	(0,0):146,(1,0):39,(1,1):266	0:44,1:261	(0,0):507,(0,1):2,(1,0):227,(1,1):671	0:247,1:653	chr2R	+	1708978517089780	1709242817092420
331	Mpcp	chr3L:14530782:14530948|14530802:+@chr3L:14531104:14531521:+	a5ss	0.01	0.01	0.01	0.03	0.03	0.03	-0.02	1000000000000	'chr3L:14530782:14530948|14530802:+@chr3L:14531104:14531521:+.A.coreAndExt_chr3L:14530782:14530948|14530802:+@chr3L:14531104:14531521:+.A.dn','chr3L:14530782:14530948|14530802:+@chr3L:14531104:14531521:+.B.core_chr3L:14530782:14530948|14530802:+@chr3L:14531104:14531521:+.B.dn'	(0,0):1741,(0,1):826,(1,0):37,(1,1):4257	0:73,1:5047	(0,0):2980,(0,1):1961,(1,0):209,(1,1):6326	0:409,1:8087	chr3L	+	1453078214530780	1453152114531520
332	PRL-1	chr2L:16248768:16248602|16247504:-@chr2L:16247253:16247384:-	a5ss	0.01	0.01	0.02	0.03	0.02	0.04	-0.02	20.68	'chr2L:16248768:16248602|16247504:-@chr2L:16247253:16247384:-.A.dn_chr2L:16248768:16248602|16247504:-@chr2L:16247253:16247384:-.A.coreAndExt','chr2L:16248768:16248602|16247504:-@chr2L:16247253:16247384:-.B.dn_chr2L:16248768:16248602|16247504:-@chr2L:16247253:16247384:-.B.core'	(0,0):346,(0,1):246,(1,0):49,(1,1):62	0:49,1:308	(0,0):432,(0,1):158,(1,0):61,(1,1):27	0:62,1:184	chr2L	-	1624725316247250	1624876816248760
333	His4r	chr3R:10451469:10451639|10451537:+@chr3R:10451748:10451951:+	a5ss	0.03	0.02	0.03	0.05	0.04	0.06	-0.02	10.51	'chr3R:10451469:10451639|10451537:+@chr3R:10451748:10451951:+.A.coreAndExt_chr3R:10451469:10451639|10451537:+@chr3R:10451748:10451951:+.A.dn','chr3R:10451469:10451639|10451537:+@chr3R:10451748:10451951:+.B.core_chr3R:10451469:10451639|10451537:+@chr3R:10451748:10451951:+.B.dn'	(0,0):1354,(0,1):1828,(1,0):166,(1,1):1771	0:214,1:3551	(0,0):352,(0,1):716,(1,0):103,(1,1):384	0:124,1:1079	chr3R	+	1045146910451460	1045195110451950
334	CG4019	chr2R:19501907:19501972:-@chr2R:19495655:19496204:-	ri	0.01	0	0.01	0.02	0.01	0.02	-0.01	1000000000000	'chr2R:19501907:19501972:-@chr2R:19495655:19496204:-.A.withRI','chr2R:19501907:19501972:-@chr2R:19495655:19496204:-.B.dn_chr2R:19501907:19501972:-@chr2R:19495655:19496204:-.B.up'	(0,0):715,(1,0):148,(1,1):2120	0:155,1:2113	(0,0):988,(0,1):4,(1,0):681,(1,1):3293	0:718,1:3260	chr2R	-	1949565519495650	1950197219501970
335	CG17664	chr2R:19503244:19503381:-@chr2R:19495655:19496204:-	ri	0.01	0	0.01	0.02	0.01	0.02	-0.01	1000000000000	'chr2R:19503244:19503381:-@chr2R:19495655:19496204:-.A.withRI','chr2R:19503244:19503381:-@chr2R:19495655:19496204:-.B.dn_chr2R:19503244:19503381:-@chr2R:19495655:19496204:-.B.up'	(0,0):739,(1,0):167,(1,1):2120	0:181,1:2106	(0,0):1088,(0,1):3,(1,0):721,(1,1):3294	0:768,1:3250	chr2R	-	1949565519495650	1950338119503380
336	CG4019	chr2R:19501551:19501619:-@chr2R:19495655:19496204:-	ri	0.01	0	0.01	0.02	0.01	0.02	-0.01	1000000000000	'chr2R:19501551:19501619:-@chr2R:19495655:19496204:-.A.withRI','chr2R:19501551:19501619:-@chr2R:19495655:19496204:-.B.dn_chr2R:19501551:19501619:-@chr2R:19495655:19496204:-.B.up'	(0,0):712,(1,0):144,(1,1):2120	0:156,1:2108	(0,0):982,(0,1):3,(1,0):646,(1,1):3293	0:705,1:3237	chr2R	-	1949565519495650	1950161919501610
337	CG4019	chr2R:19501990:19502243:-@chr2R:19495655:19496204:-	ri	0.01	0.01	0.01	0.02	0.02	0.02	-0.01	1000000000000	'chr2R:19501990:19502243:-@chr2R:19495655:19496204:-.A.withRI','chr2R:19501990:19502243:-@chr2R:19495655:19496204:-.B.dn_chr2R:19501990:19502243:-@chr2R:19495655:19496204:-.B.up'	(0,0):716,(0,1):23,(1,0):155,(1,1):2126	0:171,1:2133	(0,0):989,(0,1):99,(1,0):700,(1,1):3307	0:771,1:3335	chr2R	-	1949565519495650	1950224319502240
338	Idh	chr3L:8351950:8351963:-@chr3L:8349503:8351005:-	ri	0.01	0.01	0.02	0.02	0.02	0.03	-0.01	1000000000000	'chr3L:8351950:8351963:-@chr3L:8349503:8351005:-.A.withRI','chr3L:8351950:8351963:-@chr3L:8349503:8351005:-.B.dn_chr3L:8351950:8351963:-@chr3L:8349503:8351005:-.B.up'	(0,0):1607,(1,0):258,(1,1):25085	0:602,1:24741	(0,0):3072,(1,0):682,(1,1):38919	0:1648,1:37953	chr3L	-	83495038349503	83519638351963
339	Mhc	chr2L:16776850:16777439:+@chr2L:16779728:16779845:+	ri	0.01	0.01	0.02	0.02	0.02	0.03	-0.01	1000000000000	'chr2L:16776850:16777439:+@chr2L:16779728:16779845:+.A.withRI','chr2L:16776850:16777439:+@chr2L:16779728:16779845:+.B.up_chr2L:16776850:16777439:+@chr2L:16779728:16779845:+.B.dn'	(0,0):1265,(0,1):190,(1,0):192,(1,1):2935	0:232,1:3085	(0,0):3929,(0,1):817,(1,0):1401,(1,1):12073	0:1707,1:12584	chr2L	+	1677685016776850	1677984516779840
340	Mhc	chr2L:16776850:16777439:+@chr2L:16780550:16780813:+	ri	0.01	0.01	0.02	0.02	0.02	0.03	-0.01	1000000000000	'chr2L:16776850:16777439:+@chr2L:16780550:16780813:+.A.withRI','chr2L:16776850:16777439:+@chr2L:16780550:16780813:+.B.up_chr2L:16776850:16777439:+@chr2L:16780550:16780813:+.B.dn'	(0,0):2451,(0,1):65,(1,0):261,(1,1):3810	0:322,1:3814	(0,0):7769,(0,1):205,(1,0):1886,(1,1):15884	0:2287,1:15688	chr2L	+	1677685016776850	1678081316780810
341	RpS26	chr2L:18443153:18443200:-@chr2L:18442505:18443070:-	ri	0	0	0	0.01	0.01	0.02	-0.01	1000000000000	'chr2L:18443153:18443200:-@chr2L:18442505:18443070:-.A.withRI','chr2L:18443153:18443200:-@chr2L:18442505:18443070:-.B.dn_chr2L:18443153:18443200:-@chr2L:18442505:18443070:-.B.up'	(0,0):6119,(0,1):7817,(1,0):22,(1,1):32960	0:64,1:40735	(0,0):7367,(0,1):7726,(1,0):233,(1,1):35403	0:720,1:42642	chr2L	-	1844250518442500	1844320018443200
342	Mhc	chr2L:16776850:16777439:+@chr2L:16779093:16779210:+	ri	0.01	0.01	0.01	0.02	0.02	0.02	-0.01	1000000000000	'chr2L:16776850:16777439:+@chr2L:16779093:16779210:+.A.withRI','chr2L:16776850:16777439:+@chr2L:16779093:16779210:+.B.up_chr2L:16776850:16777439:+@chr2L:16779093:16779210:+.B.dn'	(0,0):768,(0,1):494,(1,0):138,(1,1):2939	0:170,1:3401	(0,0):2285,(0,1):1669,(1,0):1011,(1,1):12071	0:1262,1:13489	chr2L	+	1677685016776850	1677921016779210
343	Mhc	chr2L:16776850:16777439:+@chr2L:16782344:16782553:+	ri	0.04	0.04	0.05	0.05	0.05	0.05	-0.01	1000000000000	'chr2L:16776850:16777439:+@chr2L:16782344:16782553:+.A.withRI','chr2L:16776850:16777439:+@chr2L:16782344:16782553:+.B.up_chr2L:16776850:16777439:+@chr2L:16782344:16782553:+.B.dn'	(0,0):3534,(0,1):1,(1,0):1168,(1,1):3384	0:1312,1:3241	(0,0):11723,(0,1):3,(1,0):5873,(1,1):13981	0:6632,1:13225	chr2L	+	1677685016776850	1678255316782550
344	Sam-S	chr2L:110755:110877:+@chr2L:112690:113369:+	ri	0.04	0.03	0.04	0.05	0.05	0.06	-0.01	1000000000000	'chr2L:110755:110877:+@chr2L:112690:113369:+.A.withRI','chr2L:110755:110877:+@chr2L:112690:113369:+.B.up_chr2L:110755:110877:+@chr2L:112690:113369:+.B.dn'	(0,0):1967,(0,1):78,(1,0):416,(1,1):3796	0:565,1:3725	(0,0):1830,(0,1):17,(1,0):556,(1,1):3587	0:776,1:3384	chr2L	+	110755110755	113369113369
345	Ald	chr3R:22084709:22084996:-@chr3R:22082947:22083763:-	ri	0.01	0.01	0.01	0.02	0.02	0.02	-0.01	1000000000000	'chr3R:22084709:22084996:-@chr3R:22082947:22083763:-.A.withRI','chr3R:22084709:22084996:-@chr3R:22082947:22083763:-.B.dn_chr3R:22084709:22084996:-@chr3R:22082947:22083763:-.B.up'	(0,0):3287,(0,1):93,(1,0):158,(1,1):21257	0:326,1:21182	(0,0):4238,(0,1):299,(1,0):597,(1,1):25786	0:1142,1:25540	chr3R	-	2208294722082940	2208499622084990
346	Nlp	chr3R:25831010:25831143:+@chr3R:25835400:25836074:+	ri	0.01	0	0.01	0.02	0.02	0.02	-0.01	1000000000000	'chr3R:25831010:25831143:+@chr3R:25835400:25836074:+.A.withRI','chr3R:25831010:25831143:+@chr3R:25835400:25836074:+.B.up_chr3R:25831010:25831143:+@chr3R:25835400:25836074:+.B.dn'	(0,0):511,(0,1):1138,(1,0):194,(1,1):3746	0:214,1:4864	(0,0):1018,(0,1):1258,(1,0):1015,(1,1):5102	0:1126,1:6249	chr3R	+	2583101025831010	2583607425836070
347	Fim	chrX:17195393:17196024:-@chrX:17181960:17183070:-	ri	0.02	0.02	0.02	0.03	0.03	0.03	-0.01	1.46933e+11	'chrX:17195393:17196024:-@chrX:17181960:17183070:-.A.withRI','chrX:17195393:17196024:-@chrX:17181960:17183070:-.B.dn_chrX:17195393:17196024:-@chrX:17181960:17183070:-.B.up'	(0,0):494,(0,1):60,(1,0):393,(1,1):2214	0:432,1:2235	(0,0):866,(0,1):122,(1,0):811,(1,1):3071	0:911,1:3093	chrX	-	1718196017181960	1719602417196020
348	Mhc	chr2L:16779093:16779199:+@chr2L:16780550:16780813:+	ri	0.01	0.01	0.02	0.02	0.02	0.03	-0.01	3.9439e+10	'chr2L:16779093:16779199:+@chr2L:16780550:16780813:+.A.withRI','chr2L:16779093:16779199:+@chr2L:16780550:16780813:+.B.up_chr2L:16779093:16779199:+@chr2L:16780550:16780813:+.B.dn'	(0,0):1106,(0,1):143,(1,0):118,(1,1):879	0:121,1:1019	(0,0):2700,(0,1):738,(1,0):836,(1,1):3820	0:929,1:4465	chr2L	+	1677909316779090	1678081316780810
349	GlyS	chr3R:10973197:10973329:-@chr3R:10969988:10970961:-	ri	0.01	0.01	0.01	0.02	0.02	0.02	-0.01	3.65919e+07	'chr3R:10973197:10973329:-@chr3R:10969988:10970961:-.A.withRI','chr3R:10973197:10973329:-@chr3R:10969988:10970961:-.B.dn_chr3R:10973197:10973329:-@chr3R:10969988:10970961:-.B.up'	(0,0):124,(0,1):173,(1,0):35,(1,1):1362	0:44,1:1526	(0,0):332,(0,1):302,(1,0):151,(1,1):2498	0:212,1:2739	chr3R	-	1096998810969980	1097332910973320
350	RpL13A	chr3R:1450096:1450242:+@chr3R:1451236:1451679:+	ri	0.11	0.11	0.11	0.12	0.12	0.12	-0.01	104.28	'chr3R:1450096:1450242:+@chr3R:1451236:1451679:+.A.withRI','chr3R:1450096:1450242:+@chr3R:1451236:1451679:+.B.up_chr3R:1450096:1450242:+@chr3R:1451236:1451679:+.B.dn'	(0,0):25142,(0,1):3,(1,0):6850,(1,1):24342	0:9546,1:21649	(0,0):32448,(0,1):7,(1,0):8919,(1,1):29415	0:12484,1:25857	chr3R	+	14500961450096	14516791451679
351	Mhc	chr2L:16779728:16779845:+@chr2L:16780550:16780813:+	ri	0.02	0.01	0.02	0.03	0.03	0.03	-0.01	83.6	'chr2L:16779728:16779845:+@chr2L:16780550:16780813:+.A.withRI','chr2L:16779728:16779845:+@chr2L:16780550:16780813:+.B.up_chr2L:16779728:16779845:+@chr2L:16780550:16780813:+.B.dn'	(0,0):620,(0,1):119,(1,0):64,(1,1):877	0:82,1:978	(0,0):1516,(0,1):137,(1,0):446,(1,1):3829	0:576,1:3836	chr2L	+	1677972816779720	1678081316780810
352	GlyS	chr3R:10972787:10973150:-@chr3R:10969988:10970961:-	ri	0.02	0.01	0.02	0.03	0.03	0.04	-0.01	25.01	'chr3R:10972787:10973150:-@chr3R:10969988:10970961:-.A.withRI','chr3R:10972787:10973150:-@chr3R:10969988:10970961:-.B.dn_chr3R:10972787:10973150:-@chr3R:10969988:10970961:-.B.up'	(0,0):294,(1,0):33,(1,1):1362	0:64,1:1331	(0,0):621,(0,1):7,(1,0):128,(1,1):2511	0:195,1:2451	chr3R	-	1096998810969980	1097315010973150
353	His4r	chr3R:10451469:10451537:+@chr3R:10451748:10451951:+	ri	0.01	0.01	0.01	0.02	0.02	0.03	-0.01	22.8	'chr3R:10451469:10451537:+@chr3R:10451748:10451951:+.A.withRI','chr3R:10451469:10451537:+@chr3R:10451748:10451951:+.B.up_chr3R:10451469:10451537:+@chr3R:10451748:10451951:+.B.dn'	(0,0):1412,(0,1):1841,(1,0):108,(1,1):1758	0:129,1:3578	(0,0):387,(0,1):718,(1,0):68,(1,1):382	0:75,1:1093	chr3R	+	1045146910451460	1045195110451950
354	CG11357	chr3L:4542643:4542907:+@chr3L:4551002:4551940:+	ri	0.02	0.01	0.02	0.03	0.02	0.04	-0.01	10.71	'chr3L:4542643:4542907:+@chr3L:4551002:4551940:+.A.withRI','chr3L:4542643:4542907:+@chr3L:4551002:4551940:+.B.up_chr3L:4542643:4542907:+@chr3L:4551002:4551940:+.B.dn'	(0,0):65,(0,1):58,(1,0):59,(1,1):399	0:69,1:447	(0,0):46,(0,1):15,(1,0):74,(1,1):277	0:86,1:280	chr3L	+	45426434542643	45519404551940
355	CG7912, Nlp	chr3R:25831010:25834986|25831143:+@chr3R:25835400:25836074:+	a5ss	0.01	0.01	0.01	0.02	0.02	0.03	-0.01	1000000000000	'chr3R:25831010:25834986|25831143:+@chr3R:25835400:25836074:+.A.coreAndExt_chr3R:25831010:25834986|25831143:+@chr3R:25835400:25836074:+.A.dn','chr3R:25831010:25834986|25831143:+@chr3R:25835400:25836074:+.B.core_chr3R:25831010:25834986|25831143:+@chr3R:25835400:25836074:+.B.dn'	(0,0):517,(0,1):1138,(1,0):188,(1,1):3746	0:214,1:4858	(0,0):1034,(0,1):1258,(1,0):999,(1,1):5102	0:1132,1:6227	chr3R	+	2583101025831010	2583607425836070
356	Rtnl1	chr2L:4999225:4999339:-@chr2L:4994787:4994994:-	ri	0.03	0.03	0.04	0.02	0.02	0.02	0.01	1000000000000	'chr2L:4999225:4999339:-@chr2L:4994787:4994994:-.A.withRI','chr2L:4999225:4999339:-@chr2L:4994787:4994994:-.B.dn_chr2L:4999225:4999339:-@chr2L:4994787:4994994:-.B.up'	(0,0):2731,(0,1):362,(1,0):1443,(1,1):895	0:1469,1:1231	(0,0):1781,(0,1):300,(1,0):513,(1,1):541	0:520,1:834	chr2L	-	49947874994787	49993394999339
357	RpS3A	chr4:87718:87863:-@chr4:87466:87548:-	ri	0.98	0.98	0.98	0.97	0.96	0.97	0.01	303.05	'chr4:87718:87863:-@chr4:87466:87548:-.A.withRI','chr4:87718:87863:-@chr4:87466:87548:-.B.dn_chr4:87718:87863:-@chr4:87466:87548:-.B.up'	(0,0):8543,(0,1):6,(1,0):30323,(1,1):608	0:30758,1:179	(0,0):6483,(0,1):42,(1,0):26414,(1,1):550	0:26764,1:242	chr4	-	8746687466	8786387863
358	psq	chr2R:6449531:6493639|6449695:+@chr2R:6498055:6499020:+	a5ss	0.03	0.03	0.04	0.02	0.02	0.02	0.01	37.98	'chr2R:6449531:6493639|6449695:+@chr2R:6498055:6499020:+.A.coreAndExt_chr2R:6449531:6493639|6449695:+@chr2R:6498055:6499020:+.A.dn','chr2R:6449531:6493639|6449695:+@chr2R:6498055:6499020:+.B.core_chr2R:6449531:6493639|6449695:+@chr2R:6498055:6499020:+.B.dn'	(0,0):76,(0,1):23,(1,0):405,(1,1):256	0:415,1:269	(0,0):102,(0,1):20,(1,0):288,(1,1):297	0:295,1:310	chr2R	+	64495316449531	64990206499020
359	psq	chr2R:6449531:6493562|6449695:+@chr2R:6498055:6499020:+	a5ss	0.03	0.03	0.04	0.02	0.02	0.02	0.01	17.47	'chr2R:6449531:6493562|6449695:+@chr2R:6498055:6499020:+.A.coreAndExt_chr2R:6449531:6493562|6449695:+@chr2R:6498055:6499020:+.A.dn','chr2R:6449531:6493562|6449695:+@chr2R:6498055:6499020:+.B.core_chr2R:6449531:6493562|6449695:+@chr2R:6498055:6499020:+.B.dn'	(0,0):76,(0,1):23,(1,0):405,(1,1):256	0:411,1:273	(0,0):102,(0,1):20,(1,0):288,(1,1):297	0:291,1:314	chr2R	+	64495316449531	64990206499020
360	Rtnl1	chr2L:5008181:5009744:-@chr2L:4994787:4994994:-	ri	0.04	0.04	0.05	0.02	0.02	0.02	0.02	1000000000000	'chr2L:5008181:5009744:-@chr2L:4994787:4994994:-.A.withRI','chr2L:5008181:5009744:-@chr2L:4994787:4994994:-.B.dn_chr2L:5008181:5009744:-@chr2L:4994787:4994994:-.B.up'	(0,0):3691,(0,1):200,(1,0):1844,(1,1):4837	0:2063,1:4818	(0,0):2755,(0,1):263,(1,0):1006,(1,1):6863	0:1130,1:7002	chr2L	-	49947874994787	50097445009744
361	RpS3A	chr4:87718:87863:-@chr4:87466:87532:-	ri	0.99	0.98	0.99	0.97	0.96	0.97	0.02	1000000000000	'chr4:87718:87863:-@chr4:87466:87532:-.A.withRI','chr4:87718:87863:-@chr4:87466:87532:-.B.dn_chr4:87718:87863:-@chr4:87466:87532:-.B.up'	(0,0):8543,(0,1):6,(1,0):30424,(1,1):507	0:30835,1:102	(0,0):6483,(0,1):42,(1,0):26476,(1,1):488	0:26813,1:193	chr4	-	8746687466	8786387863
362	RpS25	chr3R:7041691:7041557|7041415:-@chr3R:7041145:7041346:-	a5ss	0.96	0.96	0.96	0.94	0.94	0.95	0.02	1000000000000	'chr3R:7041691:7041557|7041415:-@chr3R:7041145:7041346:-.A.dn_chr3R:7041691:7041557|7041415:-@chr3R:7041145:7041346:-.A.coreAndExt','chr3R:7041691:7041557|7041415:-@chr3R:7041145:7041346:-.B.dn_chr3R:7041691:7041557|7041415:-@chr3R:7041145:7041346:-.B.core'	(0,0):11381,(0,1):196,(1,0):38450,(1,1):8875	0:46547,1:974	(0,0):10976,(0,1):138,(1,0):25179,(1,1):6447	0:30814,1:950	chr3R	-	70411457041145	70416917041691
363	CG45078	chr3R:6602899:6603083:-@chr3R:6598857:6598883:-	ri	0.06	0.05	0.06	0.03	0.03	0.03	0.03	1000000000000	'chr3R:6602899:6603083:-@chr3R:6598857:6598883:-.A.withRI','chr3R:6602899:6603083:-@chr3R:6598857:6598883:-.B.dn_chr3R:6602899:6603083:-@chr3R:6598857:6598883:-.B.up'	(0,0):3688,(0,1):55,(1,0):7020,(1,1):1384	0:7092,1:1367	(0,0):2895,(0,1):15,(1,0):6192,(1,1):2206	0:6267,1:2146	chr3R	-	65988576598857	66030836603083
364	up	chrX:13490544:13490781:-@chrX:13490412:13490489:-	ri	0.99	0.98	0.99	0.96	0.94	0.97	0.03	33750.2	'chrX:13490544:13490781:-@chrX:13490412:13490489:-.A.withRI','chrX:13490544:13490781:-@chrX:13490412:13490489:-.B.dn_chrX:13490544:13490781:-@chrX:13490412:13490489:-.B.up'	(0,0):4675,(0,1):7,(1,0):5112,(1,1):4574	0:9617,1:76	(0,0):6642,(0,1):9,(1,0):7169,(1,1):11146	0:17659,1:665	chrX	-	1349041213490410	1349078113490780
365	CG17826	chr3L:11943059:11943714:+@chr3L:11944351:11945390:+	ri	0.06	0.05	0.07	0.03	0.02	0.04	0.03	2893.19	'chr3L:11943059:11943714:+@chr3L:11944351:11945390:+.A.withRI','chr3L:11943059:11943714:+@chr3L:11944351:11945390:+.B.up_chr3L:11943059:11943714:+@chr3L:11944351:11945390:+.B.dn'	(0,0):1133,(1,0):248,(1,1):9886	0:860,1:9274	(0,0):259,(1,0):37,(1,1):3067	0:123,1:2981	chr3L	+	1194305911943050	1194539011945390
366	dlt, dlt	chr3L:1795199:1795295:-@chr3L:1789017:1789101:-	ri	0.04	0.03	0.05	0.01	0.01	0.02	0.03	20.08	'chr3L:1795199:1795295:-@chr3L:1789017:1789101:-.A.withRI','chr3L:1795199:1795295:-@chr3L:1789017:1789101:-.B.dn_chr3L:1795199:1795295:-@chr3L:1789017:1789101:-.B.up'	(0,0):42,(0,1):31,(1,0):240,(1,1):2	0:240,1:33	(0,0):97,(0,1):58,(1,0):160	0:160,1:58	chr3L	-	17890171789017	17952951795295
367	RpS25	chr3R:7041691:7041557|7041414:-@chr3R:7041145:7041346:-	a5ss	0.94	0.93	0.94	0.91	0.9	0.92	0.03	1000000000000	'chr3R:7041691:7041557|7041414:-@chr3R:7041145:7041346:-.A.dn_chr3R:7041691:7041557|7041414:-@chr3R:7041145:7041346:-.A.coreAndExt','chr3R:7041691:7041557|7041414:-@chr3R:7041145:7041346:-.B.dn_chr3R:7041691:7041557|7041414:-@chr3R:7041145:7041346:-.B.core'	(0,0):21121,(0,1):197,(1,0):28710,(1,1):8874	0:36622,1:1159	(0,0):17834,(0,1):143,(1,0):18321,(1,1):6442	0:23705,1:1201	chr3R	-	70411457041145	70416917041691
368	Nplp2	chr3L:13349827:13349952|13349946:+@chr3L:13350108:13350349:+	a5ss	1	1	1	0.97	0.97	0.97	0.03	1000000000000	'chr3L:13349827:13349952|13349946:+@chr3L:13350108:13350349:+.A.coreAndExt_chr3L:13349827:13349952|13349946:+@chr3L:13350108:13350349:+.A.dn','chr3L:13349827:13349952|13349946:+@chr3L:13350108:13350349:+.B.core_chr3L:13349827:13349952|13349946:+@chr3L:13350108:13350349:+.B.dn'	(0,0):10975,(1,0):13374,(1,1):16753	0:30126,1:1	(0,0):21917,(0,1):508,(1,0):17690,(1,1):32227	0:48912,1:1513	chr3L	+	1334982713349820	1335034913350340
369	eIF-5A	chr2R:19946007:19946185:+@chr2R:19946455:19946656:+	ri	0.05	0.04	0.05	0.01	0.01	0.01	0.04	1000000000000	'chr2R:19946007:19946185:+@chr2R:19946455:19946656:+.A.withRI','chr2R:19946007:19946185:+@chr2R:19946455:19946656:+.B.up_chr2R:19946007:19946185:+@chr2R:19946455:19946656:+.B.dn'	(0,0):17795,(0,1):3398,(1,0):1062,(1,1):9736	0:1542,1:12654	(0,0):15037,(0,1):2566,(1,0):253,(1,1):12914	0:391,1:15342	chr2R	+	1994600719946000	1994665619946650
370	emp	chr2R:20870550:20870760:-@chr2R:20867056:20867184:-	ri	0.06	0.05	0.07	0.02	0.02	0.02	0.04	1000000000000	'chr2R:20870550:20870760:-@chr2R:20867056:20867184:-.A.withRI','chr2R:20870550:20870760:-@chr2R:20867056:20867184:-.B.dn_chr2R:20870550:20870760:-@chr2R:20867056:20867184:-.B.up'	(0,0):60,(0,1):79,(1,0):141,(1,1):18	0:143,1:95	(0,0):141,(0,1):653,(1,0):352,(1,1):56	0:352,1:709	chr2R	-	2086705620867050	2087076020870760
371	Argk	chr3L:9042496:9043459:-@chr3L:9041923:9042402:-	ri	0.92	0.92	0.93	0.88	0.88	0.89	0.04	1000000000000	'chr3L:9042496:9043459:-@chr3L:9041923:9042402:-.A.withRI','chr3L:9042496:9043459:-@chr3L:9041923:9042402:-.B.dn_chr3L:9042496:9043459:-@chr3L:9041923:9042402:-.B.up'	(0,0):7197,(0,1):365,(1,0):18802,(1,1):87377	0:98686,1:7858	(0,0):4527,(0,1):502,(1,0):10666,(1,1):51416	0:55500,1:7084	chr3L	-	90419239041923	90434599043459
372	CG45078	chr3R:6602899:6603083:-@chr3R:6597059:6597189:-	ri	0.12	0.11	0.12	0.08	0.08	0.08	0.04	1000000000000	'chr3R:6602899:6603083:-@chr3R:6597059:6597189:-.A.withRI','chr3R:6602899:6603083:-@chr3R:6597059:6597189:-.B.dn_chr3R:6602899:6603083:-@chr3R:6597059:6597189:-.B.up'	(0,0):4604,(1,0):7665,(1,1):1393	0:7794,1:1264	(0,0):4787,(0,1):1,(1,0):8151,(1,1):2236	0:8335,1:2053	chr3R	-	65970596597059	66030836603083
373	RpS5a	chrX:17041105:17041233:-@chrX:17040831:17041052:-	ri	0.96	0.95	0.97	0.92	0.91	0.93	0.04	1000000000000	'chrX:17041105:17041233:-@chrX:17040831:17041052:-.A.withRI','chrX:17041105:17041233:-@chrX:17040831:17041052:-.B.dn_chrX:17041105:17041233:-@chrX:17040831:17041052:-.B.up'	(0,0):11302,(0,1):34,(1,0):9443,(1,1):6992	0:16011,1:458	(0,0):19206,(0,1):81,(1,0):8372,(1,1):9464	0:16865,1:1052	chrX	-	1704083117040830	1704123317041230
374	CG5174	chr2R:14311831:14311991:+@chr2R:14312845:14312913:+	ri	0.1	0.08	0.13	0.06	0.05	0.07	0.04	22.32	'chr2R:14311831:14311991:+@chr2R:14312845:14312913:+.A.withRI','chr2R:14311831:14311991:+@chr2R:14312845:14312913:+.B.up_chr2R:14311831:14311991:+@chr2R:14312845:14312913:+.B.dn'	(0,0):1382,(0,1):9,(1,0):210,(1,1):130	0:223,1:126	(0,0):1340,(0,1):8,(1,0):191,(1,1):227	0:203,1:223	chr2R	+	1431183114311830	1431291314312910
375	VhaM9.7-b	chr3L:21532856:21533182:+@chr3L:21533253:21533300:+@chr3L:21533369:21534007:+	se	0.93	0.92	0.94	0.89	0.87	0.9	0.04	1675.09	'chr3L:21532856:21533182:+@chr3L:21533253:21533300:+@chr3L:21533369:21534007:+.A.up_chr3L:21532856:21533182:+@chr3L:21533253:21533300:+@chr3L:21533369:21534007:+.A.se_chr3L:21532856:21533182:+@chr3L:21533253:21533300:+@chr3L:21533369:21534007:+.A.dn','chr3L:21532856:21533182:+@chr3L:21533253:21533300:+@chr3L:21533369:21534007:+.B.up_chr3L:21532856:21533182:+@chr3L:21533253:21533300:+@chr3L:215333…	(0,0):108,(0,1):57,(1,0):3320,(1,1):5406	0:8226,1:557	(0,0):321,(0,1):80,(1,0):2620,(1,1):7082	0:8758,1:1024	chr3L	+	2153285621532850	2153400721534000
376	eIF-5A	chr2R:19946007:19946185:+@chr2R:19946509:19946656:+	ri	0.21	0.2	0.22	0.16	0.16	0.17	0.05	1000000000000	'chr2R:19946007:19946185:+@chr2R:19946509:19946656:+.A.withRI','chr2R:19946007:19946185:+@chr2R:19946509:19946656:+.B.up_chr2R:19946007:19946185:+@chr2R:19946509:19946656:+.B.dn'	(0,0):19587,(0,1):1606,(1,0):4702,(1,1):6096	0:5971,1:6433	(0,0):16145,(0,1):1458,(1,0):4342,(1,1):8825	0:5743,1:8882	chr2R	+	1994600719946000	1994665619946650
377	GstT4	chrX:13298691:13299117:+@chrX:13302689:13302824:+	ri	0.14	0.13	0.14	0.09	0.08	0.1	0.05	1000000000000	'chrX:13298691:13299117:+@chrX:13302689:13302824:+.A.withRI','chrX:13298691:13299117:+@chrX:13302689:13302824:+.B.up_chrX:13298691:13299117:+@chrX:13302689:13302824:+.B.dn'	(0,0):3343,(0,1):10,(1,0):2654,(1,1):1994	0:2908,1:1750	(0,0):909,(0,1):7,(1,0):972,(1,1):1137	0:1057,1:1059	chrX	+	1329869113298690	1330282413302820
378	RpS3A	chr4:87674:87863:-@chr4:87466:87532:-	ri	0.98	0.98	0.98	0.93	0.92	0.94	0.05	1000000000000	'chr4:87674:87863:-@chr4:87466:87532:-.A.withRI','chr4:87674:87863:-@chr4:87466:87532:-.B.dn_chr4:87674:87863:-@chr4:87466:87532:-.B.up'	(0,0):8543,(0,1):6,(1,0):26478,(1,1):4453	0:30740,1:197	(0,0):6483,(0,1):42,(1,0):20463,(1,1):6501	0:26310,1:696	chr4	-	8746687466	8786387863
379	CycG	chr3R:27424760:27425070:-@chr3R:27424172:27424689:-	ri	0.96	0.95	0.98	0.91	0.89	0.93	0.05	3.82454e+08	'chr3R:27424760:27425070:-@chr3R:27424172:27424689:-.A.withRI','chr3R:27424760:27425070:-@chr3R:27424172:27424689:-.B.dn_chr3R:27424760:27425070:-@chr3R:27424172:27424689:-.B.up'	(0,0):567,(0,1):8,(1,0):1381,(1,1):3347	0:4547,1:189	(0,0):906,(0,1):25,(1,0):1605,(1,1):4716	0:5816,1:530	chr3R	-	2742417227424170	2742507027425070
380	CG31789	chr2L:18605928:18606085:+@chr2L:18606178:18606523:+	ri	0.44	0.43	0.45	0.39	0.37	0.41	0.05	24.44	'chr2L:18605928:18606085:+@chr2L:18606178:18606523:+.A.withRI','chr2L:18605928:18606085:+@chr2L:18606178:18606523:+.B.up_chr2L:18605928:18606085:+@chr2L:18606178:18606523:+.B.dn'	(0,0):9101,(0,1):868,(1,0):5845,(1,1):17420	0:12151,1:11982	(0,0):1285,(0,1):178,(1,0):1019,(1,1):3028	0:1919,1:2306	chr2L	+	1860592818605920	1860652318606520
381	CG12913, Syb	chr2R:6138384:6138649:-@chr2R:6137874:6138091:-@chr2R:6136949:6137332:-	se	0.33	0.32	0.35	0.28	0.26	0.29	0.05	405.71	'chr2R:6138384:6138649:-@chr2R:6137874:6138091:-@chr2R:6136949:6137332:-.A.dn_chr2R:6138384:6138649:-@chr2R:6137874:6138091:-@chr2R:6136949:6137332:-.A.se_chr2R:6138384:6138649:-@chr2R:6137874:6138091:-@chr2R:6136949:6137332:-.A.up','chr2R:6138384:6138649:-@chr2R:6137874:6138091:-@chr2R:6136949:6137332:-.B.dn_chr2R:6138384:6138649:-@chr2R:6137874:6138091:-@chr2R:6136949:6137332:-.B.up'	(0,0):888,(0,1):1101,(1,0):1296,(1,1):2931	0:2233,1:3095	(0,0):875,(0,1):952,(1,0):948,(1,1):3114	0:1759,1:3255	chr2R	-	61369496136949	61386496138649
382	eIF-5A	chr2R:19946455:19946656:+@chr2R:19946734:19946997:+	ri	0.2	0.19	0.21	0.14	0.13	0.14	0.06	1000000000000	'chr2R:19946455:19946656:+@chr2R:19946734:19946997:+.A.withRI','chr2R:19946455:19946656:+@chr2R:19946734:19946997:+.B.up_chr2R:19946455:19946656:+@chr2R:19946734:19946997:+.B.dn'	(0,0):10192,(0,1):401,(1,0):1662,(1,1):15320	0:4455,1:12928	(0,0):7903,(0,1):175,(1,0):890,(1,1):12757	0:2413,1:11409	chr2R	+	1994645519946450	1994699719946990
383	eIF-5A	chr2R:19946007:19946176:+@chr2R:19946455:19946656:+	ri	0.08	0.08	0.08	0.02	0.01	0.02	0.06	1000000000000	'chr2R:19946007:19946176:+@chr2R:19946455:19946656:+.A.withRI','chr2R:19946007:19946176:+@chr2R:19946455:19946656:+.B.up_chr2R:19946007:19946176:+@chr2R:19946455:19946656:+.B.dn'	(0,0):18148,(0,1):3045,(1,0):1832,(1,1):8966	0:2558,1:11285	(0,0):15290,(0,1):2313,(1,0):412,(1,1):12755	0:641,1:14839	chr2R	+	1994600719946000	1994665619946650
384	Cys	chr3R:10394753:10395029:+@chr3R:10395152:10395363:+	ri	0.62	0.6	0.63	0.56	0.55	0.58	0.06	11.65	'chr3R:10394753:10395029:+@chr3R:10395152:10395363:+.A.withRI','chr3R:10394753:10395029:+@chr3R:10395152:10395363:+.B.up_chr3R:10394753:10395029:+@chr3R:10395152:10395363:+.B.dn'	(0,0):2803,(0,1):182,(1,0):2602,(1,1):3787	0:4621,1:1950	(0,0):2790,(0,1):207,(1,0):2312,(1,1):3465	0:3874,1:2110	chr3R	+	1039475310394750	1039536310395360
385	EloC	chr2R:15333644:15333453|15333261:-@chr2R:15332572:15332884:-	a5ss	0.18	0.16	0.21	0.12	0.1	0.14	0.06	59.56	'chr2R:15333644:15333453|15333261:-@chr2R:15332572:15332884:-.A.dn_chr2R:15333644:15333453|15333261:-@chr2R:15332572:15332884:-.A.coreAndExt','chr2R:15333644:15333453|15333261:-@chr2R:15332572:15332884:-.B.dn_chr2R:15333644:15333453|15333261:-@chr2R:15332572:15332884:-.B.core'	(0,0):537,(0,1):202,(1,0):166,(1,1):648	0:273,1:743	(0,0):648,(0,1):342,(1,0):163,(1,1):957	0:237,1:1225	chr2R	-	1533257215332570	1533364415333640
386	RFeSP	chr2L:1613044:1613423:-@chr2L:1612495:1612988:-	ri	0.07	0.06	0.08	0	0	0.01	0.07	1000000000000	'chr2L:1613044:1613423:-@chr2L:1612495:1612988:-.A.withRI','chr2L:1613044:1613423:-@chr2L:1612495:1612988:-.B.dn_chr2L:1613044:1613423:-@chr2L:1612495:1612988:-.B.up'	(0,0):473,(0,1):765,(1,0):109,(1,1):4339	0:393,1:4820	(0,0):849,(0,1):919,(1,0):8,(1,1):9509	0:64,1:10372	chr2L	-	16124951612495	16134231613423
387	RpS7	chr3R:26034212:26034379:-@chr3R:26033815:26034117:-	ri	0.42	0.41	0.43	0.35	0.34	0.36	0.07	1000000000000	'chr3R:26034212:26034379:-@chr3R:26033815:26034117:-.A.withRI','chr3R:26034212:26034379:-@chr3R:26033815:26034117:-.B.dn_chr3R:26034212:26034379:-@chr3R:26033815:26034117:-.B.up'	(0,0):21632,(0,1):730,(1,0):5845,(1,1):20504	0:13451,1:13628	(0,0):31947,(0,1):1095,(1,0):5617,(1,1):21710	0:11875,1:16547	chr3R	-	2603381526033810	2603437926034370
388	CG7702	chr3R:14495114:14495284:+@chr3R:14496860:14497096:+	ri	0.1	0.07	0.13	0.03	0.02	0.05	0.07	19.88	'chr3R:14495114:14495284:+@chr3R:14496860:14497096:+.A.withRI','chr3R:14495114:14495284:+@chr3R:14496860:14497096:+.B.up_chr3R:14495114:14495284:+@chr3R:14496860:14497096:+.B.dn'	(0,0):33,(0,1):2,(1,0):71,(1,1):98	0:81,1:90	(0,0):22,(0,1):1,(1,0):33,(1,1):136	0:39,1:131	chr3R	+	1449511414495110	1449709614497090
389	Mhc	chr2L:16776850:16777439:+@chr2L:16779093:16779210:+@chr2L:16779728:16779845:+	se	0.46	0.42	0.5	0.39	0.37	0.41	0.07	14.07	'chr2L:16776850:16777439:+@chr2L:16779093:16779210:+@chr2L:16779728:16779845:+.A.up_chr2L:16776850:16777439:+@chr2L:16779093:16779210:+@chr2L:16779728:16779845:+.A.se_chr2L:16776850:16777439:+@chr2L:16779093:16779210:+@chr2L:16779728:16779845:+.A.dn','chr2L:16776850:16777439:+@chr2L:16779093:16779210:+@chr2L:16779728:16779845:+.B.up_chr2L:16776850:16777439:+@chr2L:16779093:16779210:+@chr2L:167797…	(0,0):958,(0,1):104,(1,0):499,(1,1):3021	0:1882,1:1742	(0,0):3654,(0,1):344,(1,0):1676,(1,1):12546	0:6314,1:8252	chr2L	+	1677685016776850	1677984516779840
390	RNASEK	chr2R:75451:75648:-@chr2R:75265:75352:-	ri	0.12	0.1	0.13	0.04	0.03	0.05	0.08	1000000000000	'chr2R:75451:75648:-@chr2R:75265:75352:-.A.withRI','chr2R:75451:75648:-@chr2R:75265:75352:-.B.dn_chr2R:75451:75648:-@chr2R:75265:75352:-.B.up'	(0,0):2786,(0,1):5,(1,0):239,(1,1):1489	0:356,1:1377	(0,0):1910,(0,1):10,(1,0):49,(1,1):823	0:63,1:819	chr2R	-	7526575265	7564875648
391	CG17167	chrXHet:56978:57124:+@chrXHet:58624:59583:+	ri	0.15	0.12	0.18	0.07	0.06	0.09	0.08	691484	'chrXHet:56978:57124:+@chrXHet:58624:59583:+.A.withRI','chrXHet:56978:57124:+@chrXHet:58624:59583:+.B.up_chrXHet:56978:57124:+@chrXHet:58624:59583:+.B.dn'	(0,0):254,(1,0):123,(1,1):513	0:230,1:406	(0,0):331,(0,1):11,(1,0):100,(1,1):841	0:168,1:784	chrXHet	+	5697856978	5958359583
392	CG3609	chr2L:2372830:2373076:-@chr2L:2372448:2372743:-	ri	0.42	0.39	0.46	0.34	0.32	0.36	0.08	2100.33	'chr2L:2372830:2373076:-@chr2L:2372448:2372743:-.A.withRI','chr2L:2372830:2373076:-@chr2L:2372448:2372743:-.B.dn_chr2L:2372830:2373076:-@chr2L:2372448:2372743:-.B.up'	(0,0):1210,(0,1):99,(1,0):519,(1,1):1964	0:1253,1:1329	(0,0):2474,(0,1):202,(1,0):819,(1,1):3582	0:1830,1:2773	chr2L	-	23724482372448	23730762373076
393	Sam-S	chr2L:110755:110877:+@chr2L:111038:111117:+	ri	0.19	0.16	0.24	0.11	0.09	0.14	0.08	20.7	'chr2L:110755:110877:+@chr2L:111038:111117:+.A.withRI','chr2L:110755:110877:+@chr2L:111038:111117:+.B.up_chr2L:110755:110877:+@chr2L:111038:111117:+.B.dn'	(0,0):684,(0,1):2,(1,0):125,(1,1):141	0:135,1:133	(0,0):670,(0,1):12,(1,0):100,(1,1):191	0:102,1:201	chr2L	+	110755110755	111117111117
394	RNASEK	chr2R:75451:75648:-@chr2R:75265:75347:-	ri	0.14	0.12	0.15	0.05	0.04	0.06	0.09	1000000000000	'chr2R:75451:75648:-@chr2R:75265:75347:-.A.withRI','chr2R:75451:75648:-@chr2R:75265:75347:-.B.dn_chr2R:75451:75648:-@chr2R:75265:75347:-.B.up'	(0,0):2790,(0,1):1,(1,0):289,(1,1):1439	0:408,1:1321	(0,0):1914,(0,1):6,(1,0):62,(1,1):810	0:82,1:796	chr2R	-	7526575265	7564875648
395	RpS11	chr2R:8087933:8088055:-@chr2R:8087339:8087544:-	ri	0.33	0.32	0.34	0.24	0.23	0.25	0.09	1000000000000	'chr2R:8087933:8088055:-@chr2R:8087339:8087544:-.A.withRI','chr2R:8087933:8088055:-@chr2R:8087339:8087544:-.B.dn_chr2R:8087933:8088055:-@chr2R:8087339:8087544:-.B.up'	(0,0):14606,(0,1):3,(1,0):6707,(1,1):6993	0:8936,1:4767	(0,0):14658,(0,1):2,(1,0):5292,(1,1):7881	0:7249,1:5926	chr2R	-	80873398087339	80880558088055
396	CG10137, CG10165	chr2L:19530090:19530189:-@chr2L:19528088:19528369:-	ri	0.13	0.1	0.18	0.04	0.03	0.05	0.09	1.80841e+09	'chr2L:19530090:19530189:-@chr2L:19528088:19528369:-.A.withRI','chr2L:19530090:19530189:-@chr2L:19528088:19528369:-.B.dn_chr2L:19530090:19530189:-@chr2L:19528088:19528369:-.B.up'	(0,0):70,(0,1):3,(1,0):96,(1,1):75	0:108,1:66	(0,0):81,(0,1):6,(1,0):60,(1,1):179	0:67,1:178	chr2L	-	1952808819528080	1953018919530180
397	CG32495	chrX:17794649:17794861:+@chrX:17797981:17798114:+@chrX:17798643:17798685:+	se	0.24	0.2	0.27	0.15	0.12	0.17	0.09	4313.73	'chrX:17794649:17794861:+@chrX:17797981:17798114:+@chrX:17798643:17798685:+.A.up_chrX:17794649:17794861:+@chrX:17797981:17798114:+@chrX:17798643:17798685:+.A.se_chrX:17794649:17794861:+@chrX:17797981:17798114:+@chrX:17798643:17798685:+.A.dn','chrX:17794649:17794861:+@chrX:17797981:17798114:+@chrX:17798643:17798685:+.B.up_chrX:17794649:17794861:+@chrX:17797981:17798114:+@chrX:17798643:17798685:+.B…	(0,0):2261,(0,1):3,(1,0):258,(1,1):659	0:415,1:505	(0,0):1873,(0,1):1,(1,0):144,(1,1):612	0:236,1:521	chrX	+	1779464917794640	1779868517798680
398	Atf6	chr2R:1032207:1032363:+@chr2R:1040294:1040670:+	ri	0.18	0.16	0.2	0.08	0.07	0.09	0.1	1000000000000	'chr2R:1032207:1032363:+@chr2R:1040294:1040670:+.A.withRI','chr2R:1032207:1032363:+@chr2R:1040294:1040670:+.B.up_chr2R:1032207:1032363:+@chr2R:1040294:1040670:+.B.dn'	(0,0):376,(0,1):11,(1,0):1062,(1,1):241	0:1107,1:207	(0,0):235,(0,1):40,(1,0):548,(1,1):247	0:568,1:267	chr2R	+	10322071032207	10406701040670
399	CG9119	chr3L:1204587:1204884:-@chr3L:1203243:1204286:-	ri	0.19	0.18	0.21	0.09	0.08	0.1	0.1	1000000000000	'chr3L:1204587:1204884:-@chr3L:1203243:1204286:-.A.withRI','chr3L:1204587:1204884:-@chr3L:1203243:1204286:-.B.dn_chr3L:1204587:1204884:-@chr3L:1203243:1204286:-.B.up'	(0,0):1099,(0,1):508,(1,0):506,(1,1):6993	0:1942,1:6065	(0,0):1167,(0,1):377,(1,0):356,(1,1):13007	0:1621,1:12119	chr3L	-	12032431203243	12048841204884
400	RpS7	chr3R:26034212:26034379:-@chr3R:26033815:26034114:-	ri	0.46	0.45	0.47	0.36	0.35	0.36	0.1	1000000000000	'chr3R:26034212:26034379:-@chr3R:26033815:26034114:-.A.withRI','chr3R:26034212:26034379:-@chr3R:26033815:26034114:-.B.dn_chr3R:26034212:26034379:-@chr3R:26033815:26034114:-.B.up'	(0,0):21627,(0,1):735,(1,0):6451,(1,1):19898	0:14493,1:12591	(0,0):31937,(0,1):1105,(1,0):5854,(1,1):21473	0:12021,1:16411	chr3R	-	2603381526033810	2603437926034370
401	CG42235	chr3R:21736597:21736648:+@chr3R:21738943:21739165:+	ri	0.12	0.1	0.14	0.02	0.01	0.02	0.1	1000000000000	'chr3R:21736597:21736648:+@chr3R:21738943:21739165:+.A.withRI','chr3R:21736597:21736648:+@chr3R:21738943:21739165:+.B.up_chr3R:21736597:21736648:+@chr3R:21738943:21739165:+.B.dn'	(0,0):531,(0,1):50,(1,0):576,(1,1):127	0:591,1:162	(0,0):166,(0,1):39,(1,0):75,(1,1):144	0:76,1:182	chr3R	+	2173659721736590	2173916521739160
402	up	chrX:13490541:13490781:-@chrX:13489353:13489505:-	ri	0.31	0.3	0.33	0.21	0.2	0.22	0.1	1000000000000	'chrX:13490541:13490781:-@chrX:13489353:13489505:-.A.withRI','chrX:13490541:13490781:-@chrX:13489353:13489505:-.B.dn_chrX:13490541:13490781:-@chrX:13489353:13489505:-.B.up'	(0,0):12108,(0,1):109,(1,0):7853,(1,1):4536	0:9276,1:3222	(0,0):22776,(0,1):133,(1,0):11629,(1,1):10641	0:13861,1:8542	chrX	-	1348935313489350	1349078113490780
403	CG3209, Mlp60A	chr2R:19961391:19961646:-@chr2R:19960551:19960925:-	ri	0.21	0.18	0.24	0.1	0.08	0.12	0.11	1000000000000	'chr2R:19961391:19961646:-@chr2R:19960551:19960925:-.A.withRI','chr2R:19961391:19961646:-@chr2R:19960551:19960925:-.B.dn_chr2R:19961391:19961646:-@chr2R:19960551:19960925:-.B.up'	(0,0):235,(1,0):243,(1,1):1072	0:464,1:851	(0,0):228,(1,0):129,(1,1):1230	0:278,1:1081	chr2R	-	1996055119960550	1996164619961640
404	Gfat1	chr3RHet:2480187:2481026|2480985:+@chr3RHet:2481086:2481658:+	a5ss	0.98	0.96	1	0.87	0.84	0.9	0.11	1000000000000	'chr3RHet:2480187:2481026|2480985:+@chr3RHet:2481086:2481658:+.A.coreAndExt_chr3RHet:2480187:2481026|2480985:+@chr3RHet:2481086:2481658:+.A.dn','chr3RHet:2480187:2481026|2480985:+@chr3RHet:2481086:2481658:+.B.core_chr3RHet:2480187:2481026|2480985:+@chr3RHet:2481086:2481658:+.B.dn'	(0,0):110,(1,0):240,(1,1):1657	0:1824,1:73	(0,0):452,(0,1):15,(1,0):730,(1,1):6832	0:6486,1:1091	chr3RHet	+	24801872480187	24816582481658
405	CG15279	chr2L:14848674:14848977:-@chr2L:14848005:14848254:-@chr2L:14846790:14847057:-	se	0.16	0.11	0.21	0.05	0.02	0.09	0.11	29.05	'chr2L:14848674:14848977:-@chr2L:14848005:14848254:-@chr2L:14846790:14847057:-.A.dn_chr2L:14848674:14848977:-@chr2L:14848005:14848254:-@chr2L:14846790:14847057:-.A.se_chr2L:14848674:14848977:-@chr2L:14848005:14848254:-@chr2L:14846790:14847057:-.A.up','chr2L:14848674:14848977:-@chr2L:14848005:14848254:-@chr2L:14846790:14847057:-.B.dn_chr2L:14848674:14848977:-@chr2L:14848005:14848254:-@chr2L:148467…	(0,0):120,(0,1):85,(1,0):44,(1,1):174	0:59,1:244	(0,0):76,(0,1):59,(1,0):8,(1,1):109	0:15,1:161	chr2L	-	1484679014846790	1484897714848970
406	RpS11	chr2R:8087699:8087746:-@chr2R:8087339:8087544:-	ri	0.45	0.44	0.47	0.33	0.32	0.34	0.12	1000000000000	'chr2R:8087699:8087746:-@chr2R:8087339:8087544:-.A.withRI','chr2R:8087699:8087746:-@chr2R:8087339:8087544:-.B.dn_chr2R:8087699:8087746:-@chr2R:8087339:8087544:-.B.up'	(0,0):14559,(0,1):45,(1,0):6555,(1,1):7112	0:9728,1:3984	(0,0):14581,(0,1):57,(1,0):5103,(1,1):7947	0:7606,1:5501	chr2R	-	80873398087339	80877468087746
407	lig	chr2R:3963798:3963953:+@chr2R:3964765:3964796:+	ri	0.15	0.09	0.24	0.03	0.02	0.05	0.12	4610.46	'chr2R:3963798:3963953:+@chr2R:3964765:3964796:+.A.withRI','chr2R:3963798:3963953:+@chr2R:3964765:3964796:+.B.up_chr2R:3963798:3963953:+@chr2R:3964765:3964796:+.B.dn'	(0,0):112,(0,1):2,(1,0):73,(1,1):20	0:75,1:20	(0,0):187,(0,1):2,(1,0):45,(1,1):65	0:48,1:64	chr2R	+	39637983963798	39647963964796
408	CG44251	chr2R:8839836:8839678|8837658:-@chr2R:8835853:8837591:-	a5ss	0.95	0.94	0.96	0.83	0.81	0.84	0.12	1000000000000	'chr2R:8839836:8839678|8837658:-@chr2R:8835853:8837591:-.A.dn_chr2R:8839836:8839678|8837658:-@chr2R:8835853:8837591:-.A.coreAndExt','chr2R:8839836:8839678|8837658:-@chr2R:8835853:8837591:-.B.dn_chr2R:8839836:8839678|8837658:-@chr2R:8835853:8837591:-.B.core'	(0,0):1559,(0,1):131,(1,0):7205,(1,1):1372	0:8487,1:221	(0,0):1372,(0,1):263,(1,0):6251,(1,1):3583	0:9216,1:881	chr2R	-	88358538835853	88398368839836
409	crc	chr2L:21318321:21318419:+@chr2L:21318516:21318584:+	ri	0.21	0.17	0.25	0.08	0.07	0.1	0.13	1000000000000	'chr2L:21318321:21318419:+@chr2L:21318516:21318584:+.A.withRI','chr2L:21318321:21318419:+@chr2L:21318516:21318584:+.B.up_chr2L:21318321:21318419:+@chr2L:21318516:21318584:+.B.dn'	(0,0):2127,(1,0):151,(1,1):242	0:181,1:212	(0,0):3616,(1,0):167,(1,1):736	0:202,1:701	chr2L	+	2131832121318320	2131858421318580
410	RFeSP	chr2L:1613040:1613423:-@chr2L:1612495:1612988:-	ri	0.14	0.11	0.16	0.01	0	0.01	0.13	1000000000000	'chr2L:1613040:1613423:-@chr2L:1612495:1612988:-.A.withRI','chr2L:1613040:1613423:-@chr2L:1612495:1612988:-.B.dn_chr2L:1613040:1613423:-@chr2L:1612495:1612988:-.B.up'	(0,0):1166,(0,1):72,(1,0):105,(1,1):4343	0:633,1:3887	(0,0):1632,(0,1):136,(1,0):8,(1,1):9509	0:50,1:9603	chr2L	-	16124951612495	16134231613423
411	alph	chr3R:25417632:25417889:+@chr3R:25422963:25423068:+	ri	0.29	0.25	0.35	0.16	0.14	0.19	0.13	866118	'chr3R:25417632:25417889:+@chr3R:25422963:25423068:+.A.withRI','chr3R:25417632:25417889:+@chr3R:25422963:25423068:+.B.up_chr3R:25417632:25417889:+@chr3R:25422963:25423068:+.B.dn'	(0,0):749,(0,1):2,(1,0):1231,(1,1):137	0:1269,1:101	(0,0):1096,(1,0):1299,(1,1):273	0:1348,1:224	chr3R	+	2541763225417630	2542306825423060
412	AnxB9	chr3R:16895035:16895382:+@chr3R:16896000:16896420:+	ri	0.2	0.18	0.23	0.06	0.04	0.07	0.14	1000000000000	'chr3R:16895035:16895382:+@chr3R:16896000:16896420:+.A.withRI','chr3R:16895035:16895382:+@chr3R:16896000:16896420:+.B.up_chr3R:16895035:16895382:+@chr3R:16896000:16896420:+.B.dn'	(0,0):484,(0,1):1,(1,0):254,(1,1):1171	0:486,1:940	(0,0):373,(1,0):70,(1,1):1185	0:146,1:1109	chr3R	+	1689503516895030	1689642016896420
413	CG32603	chrX:14079613:14079874:-@chrX:14078735:14079303:-	ri	0.99	0.99	1	0.85	0.83	0.86	0.14	1000000000000	'chrX:14079613:14079874:-@chrX:14078735:14079303:-.A.withRI','chrX:14079613:14079874:-@chrX:14078735:14079303:-.B.dn_chrX:14079613:14079874:-@chrX:14078735:14079303:-.B.up'	(0,0):987,(0,1):4,(1,0):2031,(1,1):2317	0:4339,1:13	(0,0):1855,(0,1):221,(1,0):3529,(1,1):4239	0:7086,1:903	chrX	-	1407873514078730	1407987414079870
414	regucalcin	chrX:11910812:11911042:+@chrX:11911144:11911287:+	ri	0.92	0.9	0.94	0.76	0.71	0.81	0.16	1000000000000	'chrX:11910812:11911042:+@chrX:11911144:11911287:+.A.withRI','chrX:11910812:11911042:+@chrX:11911144:11911287:+.B.up_chrX:11910812:11911042:+@chrX:11911144:11911287:+.B.dn'	(0,0):3712,(0,1):22,(1,0):3459,(1,1):5432	0:8473,1:440	(0,0):2615,(0,1):4,(1,0):1270,(1,1):2942	0:3466,1:750	chrX	+	1191081211910810	1191128711911280
415	Ptp10D	chrX:11567366:11567494:+@chrX:11569364:11569672:+	ri	0.19	0.14	0.26	0.03	0.02	0.04	0.16	7.8663e+11	'chrX:11567366:11567494:+@chrX:11569364:11569672:+.A.withRI','chrX:11567366:11567494:+@chrX:11569364:11569672:+.B.up_chrX:11567366:11567494:+@chrX:11569364:11569672:+.B.dn'	(0,0):46,(0,1):12,(1,0):75,(1,1):37	0:79,1:45	(0,0):110,(0,1):106,(1,0):69,(1,1):168	0:74,1:269	chrX	+	1156736611567360	1156967211569670
416	RpL12	chr2R:19948336:19948516:+@chr2R:19948678|19948683:19949030:+	a3ss	0.45	0.4	0.5	0.29	0.25	0.33	0.16	1.16164e+07	'chr2R:19948336:19948516:+@chr2R:19948678|19948683:19949030:+.A.up_chr2R:19948336:19948516:+@chr2R:19948678|19948683:19949030:+.A.coreAndExt','chr2R:19948336:19948516:+@chr2R:19948678|19948683:19949030:+.B.up_chr2R:19948336:19948516:+@chr2R:19948678|19948683:19949030:+.B.core'	(0,0):9561,(0,1):6,(1,0):253,(1,1):12494	0:5551,1:7202	(0,0):10534,(0,1):6,(1,0):157,(1,1):12949	0:3680,1:9432	chr2R	+	1994833619948330	1994903019949030
417	CG5261	chr2L:7428281:7428610:+@chr2L:7428926:7429104:+	ri	0.56	0.49	0.63	0.39	0.36	0.43	0.17	992.83	'chr2L:7428281:7428610:+@chr2L:7428926:7429104:+.A.withRI','chr2L:7428281:7428610:+@chr2L:7428926:7429104:+.B.up_chr2L:7428281:7428610:+@chr2L:7428926:7429104:+.B.dn'	(0,0):584,(0,1):28,(1,0):304,(1,1):417	0:554,1:195	(0,0):1199,(0,1):53,(1,0):529,(1,1):1194	0:967,1:809	chr2L	+	74282817428281	74291047429104
418	CG32486	chr3L:3070939:3070651|3060005:-@chr3L:3058066:3058124:-	a5ss	0.31	0.21	0.46	0.14	0.1	0.19	0.17	15.05	'chr3L:3070939:3070651|3060005:-@chr3L:3058066:3058124:-.A.dn_chr3L:3070939:3070651|3060005:-@chr3L:3058066:3058124:-.A.coreAndExt','chr3L:3070939:3070651|3060005:-@chr3L:3058066:3058124:-.B.dn_chr3L:3070939:3070651|3060005:-@chr3L:3058066:3058124:-.B.core'	(0,0):244,(1,0):584,(1,1):28	0:592,1:20	(0,0):210,(1,0):464,(1,1):50	0:472,1:42	chr3L	-	30580663058066	30709393070939
419	alph	chr3R:25423141:25423195:+@chr3R:25423498:25423630:+@chr3R:25423886:25424025:+	se	0.25	0.2	0.3	0.08	0.07	0.1	0.17	1000000000000	'chr3R:25423141:25423195:+@chr3R:25423498:25423630:+@chr3R:25423886:25424025:+.A.up_chr3R:25423141:25423195:+@chr3R:25423498:25423630:+@chr3R:25423886:25424025:+.A.se_chr3R:25423141:25423195:+@chr3R:25423498:25423630:+@chr3R:25423886:25424025:+.A.dn','chr3R:25423141:25423195:+@chr3R:25423498:25423630:+@chr3R:25423886:25424025:+.B.up_chr3R:25423141:25423195:+@chr3R:25423498:25423630:+@chr3R:254238…	(0,0):203,(0,1):75,(1,0):127,(1,1):49	0:138,1:113	(0,0):277,(0,1):254,(1,0):112,(1,1):130	0:120,1:376	chr3R	+	2542314125423140	2542402525424020
420	CG5174	chr2R:14311831:14311991:+@chr2R:14312377:14312539:+@chr2R:14312845:14312913:+	se	0.93	0.88	0.97	0.76	0.67	0.85	0.17	27.25	'chr2R:14311831:14311991:+@chr2R:14312377:14312539:+@chr2R:14312845:14312913:+.A.up_chr2R:14311831:14311991:+@chr2R:14312377:14312539:+@chr2R:14312845:14312913:+.A.se_chr2R:14311831:14311991:+@chr2R:14312377:14312539:+@chr2R:14312845:14312913:+.A.dn','chr2R:14311831:14311991:+@chr2R:14312377:14312539:+@chr2R:14312845:14312913:+.B.up_chr2R:14311831:14311991:+@chr2R:14312377:14312539:+@chr2R:143128…	(0,0):892,(0,1):3,(1,0):700,(1,1):136	0:820,1:19	(0,0):1027,(0,1):1,(1,0):504,(1,1):234	0:673,1:66	chr2R	+	1431183114311830	1431291314312910
421	Cchl	chr3R:17852283:17852761:-@chr3R:17851693:17852112:-	ri	0.77	0.7	0.83	0.59	0.54	0.65	0.18	70.85	'chr3R:17852283:17852761:-@chr3R:17851693:17852112:-.A.withRI','chr3R:17852283:17852761:-@chr3R:17851693:17852112:-.B.dn_chr3R:17852283:17852761:-@chr3R:17851693:17852112:-.B.up'	(0,0):253,(0,1):13,(1,0):285,(1,1):968	0:1063,1:203	(0,0):543,(0,1):25,(1,0):520,(1,1):3217	0:2500,1:1262	chr3R	-	1785169317851690	1785276117852760
422	Ptp10D	chrX:11567366:11568935|11567494:+@chrX:11569364:11569672:+	a5ss	0.22	0.16	0.3	0.03	0.03	0.04	0.19	1000000000000	'chrX:11567366:11568935|11567494:+@chrX:11569364:11569672:+.A.coreAndExt_chrX:11567366:11568935|11567494:+@chrX:11569364:11569672:+.A.dn','chrX:11567366:11568935|11567494:+@chrX:11569364:11569672:+.B.core_chrX:11567366:11568935|11567494:+@chrX:11569364:11569672:+.B.dn'	(0,0):51,(0,1):12,(1,0):70,(1,1):37	0:79,1:40	(0,0):121,(0,1):106,(1,0):58,(1,1):168	0:64,1:268	chrX	+	1156736611567360	1156967211569670
423	RpS15Aa	chrX:13230412:13229993|13229963:-@chrX:13229735:13229906:-	a5ss	0.98	0.97	0.98	0.79	0.76	0.83	0.19	1000000000000	'chrX:13230412:13229993|13229963:-@chrX:13229735:13229906:-.A.dn_chrX:13230412:13229993|13229963:-@chrX:13229735:13229906:-.A.coreAndExt','chrX:13230412:13229993|13229963:-@chrX:13229735:13229906:-.B.dn_chrX:13230412:13229993|13229963:-@chrX:13229735:13229906:-.B.core'	(0,0):27878,(0,1):45,(1,0):4385,(1,1):26276	0:29909,1:797	(0,0):22997,(0,1):29,(1,0):1435,(1,1):20353	0:17462,1:4355	chrX	-	1322973513229730	1323041213230410
424	Nc73EF	chr3L:16952805:16952984:+@chr3L:16953638:16953767:+@chr3L:16955435:16955513:+	se	0.72	0.58	0.84	0.53	0.45	0.62	0.19	2.51	'chr3L:16952805:16952984:+@chr3L:16953638:16953767:+@chr3L:16955435:16955513:+.A.up_chr3L:16952805:16952984:+@chr3L:16953638:16953767:+@chr3L:16955435:16955513:+.A.se_chr3L:16952805:16952984:+@chr3L:16953638:16953767:+@chr3L:16955435:16955513:+.A.dn','chr3L:16952805:16952984:+@chr3L:16953638:16953767:+@chr3L:16955435:16955513:+.B.up_chr3L:16952805:16952984:+@chr3L:16953638:16953767:+@chr3L:169554…	(0,0):503,(0,1):1,(1,0):112,(1,1):66	0:152,1:27	(0,0):1899,(1,0):265,(1,1):314	0:426,1:153	chr3L	+	1695280516952800	1695551316955510
425	sgg	chrX:2568630:2568954:+@chrX:2571134:2571198:+	ri	0.57	0.49	0.67	0.37	0.33	0.41	0.2	43052.3	'chrX:2568630:2568954:+@chrX:2571134:2571198:+.A.withRI','chrX:2568630:2568954:+@chrX:2571134:2571198:+.B.up_chrX:2568630:2568954:+@chrX:2571134:2571198:+.B.dn'	(0,0):141,(1,0):1007,(1,1):157	0:1103,1:61	(0,0):290,(0,1):2,(1,0):1739,(1,1):429	0:1911,1:259	chrX	+	25686302568630	25711982571198
426	skd	chr3L:21018052:21018284:-@chr3L:21005311:21005626:-	ri	0.35	0.25	0.49	0.15	0.11	0.21	0.2	29.21	'chr3L:21018052:21018284:-@chr3L:21005311:21005626:-.A.withRI','chr3L:21018052:21018284:-@chr3L:21005311:21005626:-.B.dn_chr3L:21018052:21018284:-@chr3L:21005311:21005626:-.B.up'	(0,0):26,(0,1):9,(1,0):307,(1,1):11	0:311,1:16	(0,0):9,(0,1):15,(1,0):227,(1,1):26	0:232,1:36	chr3L	-	2100531121005310	2101828421018280
427	Nopp140	chr3L:21828174:21828329:+@chr3L:21829083:21829787:+	ri	0.57	0.48	0.66	0.36	0.32	0.39	0.21	6772.87	'chr3L:21828174:21828329:+@chr3L:21829083:21829787:+.A.withRI','chr3L:21828174:21828329:+@chr3L:21829083:21829787:+.B.up_chr3L:21828174:21828329:+@chr3L:21829083:21829787:+.B.dn'	(0,0):54,(0,1):13,(1,0):168,(1,1):206	0:269,1:118	(0,0):141,(0,1):116,(1,0):515,(1,1):935	0:867,1:699	chr3L	+	2182817421828170	2182978721829780
428	Gfat1	chr3RHet:2480187:2481018|2480985:+@chr3RHet:2481086:2481658:+	a5ss	0.91	0.81	0.99	0.7	0.64	0.75	0.21	650.92	'chr3RHet:2480187:2481018|2480985:+@chr3RHet:2481086:2481658:+.A.coreAndExt_chr3RHet:2480187:2481018|2480985:+@chr3RHet:2481086:2481658:+.A.dn','chr3RHet:2480187:2481018|2480985:+@chr3RHet:2481086:2481658:+.B.core_chr3RHet:2480187:2481018|2480985:+@chr3RHet:2481086:2481658:+.B.dn'	(0,0):255,(1,0):95,(1,1):1657	0:1692,1:60	(0,0):849,(0,1):14,(1,0):333,(1,1):6833	0:4970,1:2210	chr3RHet	+	24801872480187	24816582481658
429	CG17337	chr2R:1585315:1585513:+@chr2R:1586920:1587184:+	ri	0.84	0.78	0.91	0.62	0.58	0.66	0.22	1000000000000	'chr2R:1585315:1585513:+@chr2R:1586920:1587184:+.A.withRI','chr2R:1585315:1585513:+@chr2R:1586920:1587184:+.B.up_chr2R:1585315:1585513:+@chr2R:1586920:1587184:+.B.dn'	(0,0):2323,(1,0):4218,(1,1):957	0:5029,1:146	(0,0):2340,(0,1):2,(1,0):3947,(1,1):1229	0:4720,1:458	chr2R	+	15853151585315	15871841587184
430	CG7903	chr3R:25820872:25820931:-@chr3R:25819870:25820461:-	ri	0.42	0.3	0.58	0.2	0.14	0.27	0.22	15.25	'chr3R:25820872:25820931:-@chr3R:25819870:25820461:-.A.withRI','chr3R:25820872:25820931:-@chr3R:25819870:25820461:-.B.dn_chr3R:25820872:25820931:-@chr3R:25819870:25820461:-.B.up'	(0,0):47,(1,0):49,(1,1):138	0:120,1:67	(0,0):70,(1,0):30,(1,1):181	0:72,1:139	chr3R	-	2581987025819870	2582093125820930
431	Ptp10D	chrX:11567366:11569059|11567494:+@chrX:11569364:11569672:+	a5ss	0.26	0.18	0.34	0.04	0.03	0.05	0.22	1000000000000	'chrX:11567366:11569059|11567494:+@chrX:11569364:11569672:+.A.coreAndExt_chrX:11567366:11569059|11567494:+@chrX:11569364:11569672:+.A.dn','chrX:11567366:11569059|11567494:+@chrX:11569364:11569672:+.B.core_chrX:11567366:11569059|11567494:+@chrX:11569364:11569672:+.B.dn'	(0,0):35,(0,1):12,(1,0):86,(1,1):37	0:89,1:46	(0,0):103,(0,1):106,(1,0):76,(1,1):168	0:89,1:261	chrX	+	1156736611567360	1156967211569670
432	Vha16-1	chr2R:2515237:2515426:-@chr2R:2513343:2515126:-	ri	0.76	0.75	0.77	0.52	0.51	0.53	0.24	1000000000000	'chr2R:2515237:2515426:-@chr2R:2513343:2515126:-.A.withRI','chr2R:2515237:2515426:-@chr2R:2513343:2515126:-.B.dn_chr2R:2515237:2515426:-@chr2R:2513343:2515126:-.B.up'	(0,0):7714,(0,1):258,(1,0):4995,(1,1):45394	0:39119,1:11528	(0,0):10040,(0,1):387,(1,0):4349,(1,1):109667	0:62552,1:51851	chr2R	-	25133432513343	25154262515426
433	CG3209, Mlp60A	chr2R:19961391:19961646:-@chr2R:19960551:19960877:-	ri	0.39	0.35	0.44	0.15	0.13	0.17	0.24	1000000000000	'chr2R:19961391:19961646:-@chr2R:19960551:19960877:-.A.withRI','chr2R:19961391:19961646:-@chr2R:19960551:19960877:-.B.dn_chr2R:19961391:19961646:-@chr2R:19960551:19960877:-.B.up'	(0,0):235,(1,0):451,(1,1):864	0:809,1:506	(0,0):228,(1,0):221,(1,1):1138	0:384,1:975	chr2R	-	1996055119960550	1996164619961640
434	Pino	chr2L:1117444:1117516:-@chr2L:1116441:1116690:-@chr2L:1114601:1115943:-	se	0.75	0.68	0.84	0.51	0.45	0.57	0.24	124622	'chr2L:1117444:1117516:-@chr2L:1116441:1116690:-@chr2L:1114601:1115943:-.A.dn_chr2L:1117444:1117516:-@chr2L:1116441:1116690:-@chr2L:1114601:1115943:-.A.se_chr2L:1117444:1117516:-@chr2L:1116441:1116690:-@chr2L:1114601:1115943:-.A.up','chr2L:1117444:1117516:-@chr2L:1116441:1116690:-@chr2L:1114601:1115943:-.B.dn_chr2L:1117444:1117516:-@chr2L:1116441:1116690:-@chr2L:1114601:1115943:-.B.up'	(0,0):231,(1,0):383,(1,1):2483	0:2356,1:510	(0,0):220,(1,0):328,(1,1):3175	0:2105,1:1398	chr2L	-	11146011114601	11175161117516
435	Mhc	chr2L:16784251:16784329:+@chr2L:16785410:16785841:+	ri	0.81	0.77	0.84	0.56	0.55	0.57	0.25	1000000000000	'chr2L:16784251:16784329:+@chr2L:16785410:16785841:+.A.withRI','chr2L:16784251:16784329:+@chr2L:16785410:16785841:+.B.up_chr2L:16784251:16784329:+@chr2L:16785410:16785841:+.B.dn'	(0,0):1814,(1,0):6236,(1,1):2245	0:8039,1:442	(0,0):6240,(1,0):22830,(1,1):12096	0:29490,1:5436	chr2L	+	1678425116784250	1678584116785840
436	CG15735	chrX:11912677:11912973:+@chrX:11913661:11913791:+	ri	0.7	0.61	0.8	0.45	0.4	0.5	0.25	5.6958e+08	'chrX:11912677:11912973:+@chrX:11913661:11913791:+.A.withRI','chrX:11912677:11912973:+@chrX:11913661:11913791:+.B.up_chrX:11912677:11912973:+@chrX:11913661:11913791:+.B.dn'	(0,0):388,(1,0):661,(1,1):319	0:865,1:115	(0,0):293,(1,0):632,(1,1):490	0:860,1:262	chrX	+	1191267711912670	1191379111913790
437	CG7903	chr3R:25820872:25820931:-@chr3R:25820515:25820800:-@chr3R:25819870:25820461:-	se	0.83	0.64	0.95	0.57	0.42	0.75	0.26	2.68	'chr3R:25820872:25820931:-@chr3R:25820515:25820800:-@chr3R:25819870:25820461:-.A.dn_chr3R:25820872:25820931:-@chr3R:25820515:25820800:-@chr3R:25819870:25820461:-.A.se_chr3R:25820872:25820931:-@chr3R:25820515:25820800:-@chr3R:25819870:25820461:-.A.up','chr3R:25820872:25820931:-@chr3R:25820515:25820800:-@chr3R:25819870:25820461:-.B.dn_chr3R:25820872:25820931:-@chr3R:25820515:25820800:-@chr3R:258198…	(0,0):18,(1,0):78,(1,1):138	0:201,1:15	(0,0):37,(1,0):63,(1,1):181	0:173,1:71	chr3R	-	2581987025819870	2582093125820930
438	roX1	chrX:3756458:3756148|3756054:-@chrX:3752973:3755983:-	a5ss	0.87	0.79	0.94	0.6	0.49	0.7	0.27	167.7	'chrX:3756458:3756148|3756054:-@chrX:3752973:3755983:-.A.dn_chrX:3756458:3756148|3756054:-@chrX:3752973:3755983:-.A.coreAndExt','chrX:3756458:3756148|3756054:-@chrX:3752973:3755983:-.B.dn_chrX:3756458:3756148|3756054:-@chrX:3752973:3755983:-.B.core'	(0,0):366,(0,1):2,(1,0):168,(1,1):3952	0:3547,1:575	(0,0):308,(1,0):88,(1,1):4854	0:3019,1:1923	chrX	-	37529733752973	37564583756458
439	eEF1delta	chr2L:10232278:10232659:+@chr2L:10233481:10233561:+@chr2L:10233757:10234539:+	se	0.69	0.66	0.71	0.41	0.39	0.43	0.28	1000000000000	'chr2L:10232278:10232659:+@chr2L:10233481:10233561:+@chr2L:10233757:10234539:+.A.up_chr2L:10232278:10232659:+@chr2L:10233481:10233561:+@chr2L:10233757:10234539:+.A.se_chr2L:10232278:10232659:+@chr2L:10233481:10233561:+@chr2L:10233757:10234539:+.A.dn','chr2L:10232278:10232659:+@chr2L:10233481:10233561:+@chr2L:10233757:10234539:+.B.up_chr2L:10232278:10232659:+@chr2L:10233481:10233561:+@chr2L:102337…	(0,0):112,(0,1):341,(1,0):1619,(1,1):5182	0:4932,1:2210	(0,0):182,(0,1):846,(1,0):1295,(1,1):9427	0:4953,1:6615	chr2L	+	1023227810232270	1023453910234530
440	Mbs	chr3L:16059713:16059929:+@chr3L:16061213:16062043:+@chr3L:16063220:16063364:+	se	0.48	0.37	0.62	0.16	0.13	0.2	0.32	5.52642e+09	'chr3L:16059713:16059929:+@chr3L:16061213:16062043:+@chr3L:16063220:16063364:+.A.up_chr3L:16059713:16059929:+@chr3L:16061213:16062043:+@chr3L:16063220:16063364:+.A.se_chr3L:16059713:16059929:+@chr3L:16061213:16062043:+@chr3L:16063220:16063364:+.A.dn','chr3L:16059713:16059929:+@chr3L:16061213:16062043:+@chr3L:16063220:16063364:+.B.up_chr3L:16059713:16059929:+@chr3L:16061213:16062043:+@chr3L:160632…	(0,0):88,(0,1):14,(1,0):118,(1,1):17	0:127,1:22	(0,0):86,(0,1):84,(1,0):145,(1,1):66	0:157,1:138	chr3L	+	1605971316059710	1606336416063360
441	CG18659	chr2R:5014924:5015382:-@chr2R:5013056:5013571:-@chr2R:5011194:5011650:-	se	0.83	0.71	0.92	0.51	0.42	0.61	0.32	228315	'chr2R:5014924:5015382:-@chr2R:5013056:5013571:-@chr2R:5011194:5011650:-.A.dn_chr2R:5014924:5015382:-@chr2R:5013056:5013571:-@chr2R:5011194:5011650:-.A.se_chr2R:5014924:5015382:-@chr2R:5013056:5013571:-@chr2R:5011194:5011650:-.A.up','chr2R:5014924:5015382:-@chr2R:5013056:5013571:-@chr2R:5011194:5011650:-.B.dn_chr2R:5014924:5015382:-@chr2R:5013056:5013571:-@chr2R:5011194:5011650:-.B.up'	(0,0):255,(0,1):3,(1,0):194,(1,1):278	0:403,1:72	(0,0):485,(0,1):1,(1,0):155,(1,1):425	0:367,1:214	chr2R	-	50111945011194	50153825015382
442	Map205	chr3R:27884654:27884867:-@chr3R:27882314:27884491:-	ri	0.85	0.78	0.91	0.52	0.44	0.61	0.33	1000000000000	'chr3R:27884654:27884867:-@chr3R:27882314:27884491:-.A.withRI','chr3R:27884654:27884867:-@chr3R:27882314:27884491:-.B.dn_chr3R:27884654:27884867:-@chr3R:27882314:27884491:-.B.up'	(0,0):99,(0,1):12,(1,0):202,(1,1):1807	0:1773,1:248	(0,0):122,(0,1):13,(1,0):114,(1,1):2464	0:1344,1:1247	chr3R	-	2788231427882310	2788486727884860
443	fon	chr2L:19385780:19385792:-@chr2L:19385670:19385705:-@chr2L:19384085:19385363:-	se	0.71	0.67	0.74	0.38	0.34	0.42	0.33	1000000000000	'chr2L:19385780:19385792:-@chr2L:19385670:19385705:-@chr2L:19384085:19385363:-.A.dn_chr2L:19385780:19385792:-@chr2L:19385670:19385705:-@chr2L:19384085:19385363:-.A.se_chr2L:19385780:19385792:-@chr2L:19385670:19385705:-@chr2L:19384085:19385363:-.A.up','chr2L:19385780:19385792:-@chr2L:19385670:19385705:-@chr2L:19384085:19385363:-.B.dn_chr2L:19385780:19385792:-@chr2L:19385670:19385705:-@chr2L:193840…	(0,0):6588,(0,1):119,(1,0):1380,(1,1):46773	0:34189,1:14083	(0,0):2179,(0,1):24,(1,0):285,(1,1):21911	0:9437,1:12783	chr2L	-	1938408519384080	1938579219385790
444	su(w[a])	chrX:935020:936918:+@chrX:937246:937454:+	ri	0.9	0.78	0.97	0.56	0.47	0.66	0.34	64585.1	'chrX:935020:936918:+@chrX:937246:937454:+.A.withRI','chrX:935020:936918:+@chrX:937246:937454:+.B.up_chrX:935020:936918:+@chrX:937246:937454:+.B.dn'	(0,0):132,(0,1):1,(1,0):100,(1,1):511	0:574,1:38	(0,0):172,(0,1):21,(1,0):109,(1,1):817	0:559,1:388	chrX	+	935020935020	937454937454
445	CG5174	chr2R:14311831:14311991:+@chr2R:14312377:14312581:+@chr2R:14312845:14312913:+	se	0.81	0.73	0.89	0.47	0.4	0.55	0.34	1000000000000	'chr2R:14311831:14311991:+@chr2R:14312377:14312581:+@chr2R:14312845:14312913:+.A.up_chr2R:14311831:14311991:+@chr2R:14312377:14312581:+@chr2R:14312845:14312913:+.A.se_chr2R:14311831:14311991:+@chr2R:14312377:14312581:+@chr2R:14312845:14312913:+.A.dn','chr2R:14311831:14311991:+@chr2R:14312377:14312581:+@chr2R:14312845:14312913:+.B.up_chr2R:14311831:14311991:+@chr2R:14312377:14312581:+@chr2R:143128…	(0,0):1074,(0,1):7,(1,0):518,(1,1):132	0:624,1:33	(0,0):1166,(0,1):2,(1,0):365,(1,1):233	0:495,1:105	chr2R	+	1431183114311830	1431291314312910
446	Lsd-2	chrX:14967970:14968407:-@chrX:14967374:14967424:-@chrX:14965489:14966681:-	se	0.53	0.49	0.56	0.17	0.14	0.2	0.36	1000000000000	'chrX:14967970:14968407:-@chrX:14967374:14967424:-@chrX:14965489:14966681:-.A.dn_chrX:14967970:14968407:-@chrX:14967374:14967424:-@chrX:14965489:14966681:-.A.se_chrX:14967970:14968407:-@chrX:14967374:14967424:-@chrX:14965489:14966681:-.A.up','chrX:14967970:14968407:-@chrX:14967374:14967424:-@chrX:14965489:14966681:-.B.dn_chrX:14967970:14968407:-@chrX:14967374:14967424:-@chrX:14965489:14966681:-.B…	(0,0):1055,(0,1):267,(1,0):547,(1,1):5849	0:3649,1:3014	(0,0):451,(0,1):276,(1,0):97,(1,1):3887	0:678,1:3582	chrX	-	1496548914965480	1496840714968400
447	dre4	chr3L:1872582:1872735:-@chr3L:1872354:1872470:-@chr3L:1871528:1871917:-	se	0.48	0.41	0.55	0.1	0.08	0.13	0.38	1000000000000	'chr3L:1872582:1872735:-@chr3L:1872354:1872470:-@chr3L:1871528:1871917:-.A.dn_chr3L:1872582:1872735:-@chr3L:1872354:1872470:-@chr3L:1871528:1871917:-.A.se_chr3L:1872582:1872735:-@chr3L:1872354:1872470:-@chr3L:1871528:1871917:-.A.up','chr3L:1872582:1872735:-@chr3L:1872354:1872470:-@chr3L:1871528:1871917:-.B.dn_chr3L:1872582:1872735:-@chr3L:1872354:1872470:-@chr3L:1871528:1871917:-.B.up'	(0,0):73,(0,1):38,(1,0):122,(1,1):160	0:174,1:146	(0,0):123,(0,1):179,(1,0):55,(1,1):338	0:68,1:504	chr3L	-	18715281871528	18727351872735
448	AGO2	chr3L:15550832:15550995:+@chr3L:15551350:15551438:+	ri	0.95	0.88	0.99	0.55	0.43	0.69	0.4	1000000000000	'chr3L:15550832:15550995:+@chr3L:15551350:15551438:+.A.withRI','chr3L:15550832:15550995:+@chr3L:15551350:15551438:+.B.up_chr3L:15550832:15550995:+@chr3L:15551350:15551438:+.B.dn'	(0,0):335,(0,1):1,(1,0):561,(1,1):77	0:637,1:2	(0,0):237,(0,1):1,(1,0):246,(1,1):98	0:297,1:48	chr3L	+	1555083215550830	1555143815551430
449	CAP	chr2R:6180846:6180944:+@chr2R:6182117:6182270:+	ri	0.48	0.2	0.82	0.07	0.04	0.11	0.41	17.62	'chr2R:6180846:6180944:+@chr2R:6182117:6182270:+.A.withRI','chr2R:6180846:6180944:+@chr2R:6182117:6182270:+.B.up_chr2R:6180846:6180944:+@chr2R:6182117:6182270:+.B.dn'	(0,0):74,(1,0):37,(1,1):5	0:41,1:1	(0,0):155,(0,1):1,(1,0):40,(1,1):38	0:40,1:39	chr2R	+	61808466180846	61822706182270
450	14-3-3zeta	chr2R:5993211:5993330:+@chr2R:5993446:5993609:+@chr2R:5994972:5995249:+	se	0.76	0.73	0.79	0.35	0.33	0.37	0.41	1000000000000	'chr2R:5993211:5993330:+@chr2R:5993446:5993609:+@chr2R:5994972:5995249:+.A.up_chr2R:5993211:5993330:+@chr2R:5993446:5993609:+@chr2R:5994972:5995249:+.A.se_chr2R:5993211:5993330:+@chr2R:5993446:5993609:+@chr2R:5994972:5995249:+.A.dn','chr2R:5993211:5993330:+@chr2R:5993446:5993609:+@chr2R:5994972:5995249:+.B.up_chr2R:5993211:5993330:+@chr2R:5993446:5993609:+@chr2R:5994972:5995249:+.B.dn'	(0,0):3475,(0,1):53,(1,0):2131,(1,1):2570	0:4113,1:641	(0,0):7079,(0,1):98,(1,0):1390,(1,1):4610	0:2933,1:3165	chr2R	+	59932115993211	59952495995249
451	RpL40	chr2L:4228012:4228477:+@chr2L:4228540:4228563:+	ri	0.58	0.56	0.6	0.15	0.14	0.16	0.43	1000000000000	'chr2L:4228012:4228477:+@chr2L:4228540:4228563:+.A.withRI','chr2L:4228012:4228477:+@chr2L:4228540:4228563:+.B.up_chr2L:4228012:4228477:+@chr2L:4228540:4228563:+.B.dn'	(0,0):5907,(1,0):3243,(1,1):26235	0:18547,1:10931	(0,0):7355,(1,0):1058,(1,1):33817	0:6262,1:28613	chr2L	+	42280124228012	42285634228563
452	mRpS26	chr3L:18100067:18100527:+@chr3L:18100583:18100736:+	ri	0.88	0.69	0.99	0.45	0.34	0.58	0.43	40.65	'chr3L:18100067:18100527:+@chr3L:18100583:18100736:+.A.withRI','chr3L:18100067:18100527:+@chr3L:18100583:18100736:+.B.up_chr3L:18100067:18100527:+@chr3L:18100583:18100736:+.B.dn'	(0,0):66,(1,0):50,(1,1):368	0:405,1:13	(0,0):79,(0,1):2,(1,0):54,(1,1):903	0:524,1:435	chr3L	+	1810006718100060	1810073618100730
453	wdp	chr2R:18199201:18199492:-@chr2R:18195713:18195761:-@chr2R:18185718:18188514:-	se	0.95	0.9	0.98	0.52	0.48	0.57	0.43	1000000000000	'chr2R:18199201:18199492:-@chr2R:18195713:18195761:-@chr2R:18185718:18188514:-.A.dn_chr2R:18199201:18199492:-@chr2R:18195713:18195761:-@chr2R:18185718:18188514:-.A.se_chr2R:18199201:18199492:-@chr2R:18195713:18195761:-@chr2R:18185718:18188514:-.A.up','chr2R:18199201:18199492:-@chr2R:18195713:18195761:-@chr2R:18185718:18188514:-.B.dn_chr2R:18199201:18199492:-@chr2R:18195713:18195761:-@chr2R:181857…	(0,0):352,(0,1):4,(1,0):252,(1,1):5043	0:4948,1:351	(0,0):699,(0,1):97,(1,0):262,(1,1):10692	0:5875,1:5176	chr2R	-	1818571818185710	1819949218199490
454	CG7702	chr3R:14495114:14495420|14495284:+@chr3R:14496860:14497096:+	a5ss	0.52	0.34	0.71	0.08	0.03	0.15	0.44	411541	'chr3R:14495114:14495420|14495284:+@chr3R:14496860:14497096:+.A.coreAndExt_chr3R:14495114:14495420|14495284:+@chr3R:14496860:14497096:+.A.dn','chr3R:14495114:14495420|14495284:+@chr3R:14496860:14497096:+.B.core_chr3R:14495114:14495420|14495284:+@chr3R:14496860:14497096:+.B.dn'	(0,0):70,(1,0):34,(1,1):100	0:75,1:59	(0,0):49,(0,1):1,(1,0):6,(1,1):136	0:20,1:123	chr3R	+	1449511414495110	1449709614497090
455	RpS15Aa	chrX:13230412:13229993|13229989:-@chrX:13229735:13229906:-	a5ss	0.73	0.64	0.8	0.28	0.21	0.34	0.45	1000000000000	'chrX:13230412:13229993|13229989:-@chrX:13229735:13229906:-.A.dn_chrX:13230412:13229993|13229989:-@chrX:13229735:13229906:-.A.coreAndExt','chrX:13230412:13229993|13229989:-@chrX:13229735:13229906:-.B.dn_chrX:13230412:13229993|13229989:-@chrX:13229735:13229906:-.B.core'	(0,0):31995,(0,1):34,(1,0):268,(1,1):26287	0:19131,1:7458	(0,0):24372,(0,1):22,(1,0):60,(1,1):20360	0:3949,1:16493	chrX	-	1322973513229730	1323041213230410
456	CG2316	chr4:208795:208623|206453:-@chr4:205299:205421:-	a5ss	0.94	0.88	0.98	0.48	0.43	0.54	0.46	1000000000000	'chr4:208795:208623|206453:-@chr4:205299:205421:-.A.dn_chr4:208795:208623|206453:-@chr4:205299:205421:-.A.coreAndExt','chr4:208795:208623|206453:-@chr4:205299:205421:-.B.dn_chr4:208795:208623|206453:-@chr4:205299:205421:-.B.core'	(0,0):1269,(0,1):3,(1,0):3037,(1,1):92	0:3122,1:10	(0,0):989,(0,1):36,(1,0):2508,(1,1):187	0:2585,1:146	chr4	-	205299205299	208795208795
457	CG2316	chr4:208623:208795:-@chr4:205299:205421:-	ri	0.82	0.7	0.92	0.33	0.29	0.37	0.49	1000000000000	'chr4:208623:208795:-@chr4:205299:205421:-.A.withRI','chr4:208623:208795:-@chr4:205299:205421:-.B.dn_chr4:208623:208795:-@chr4:205299:205421:-.B.up'	(0,0):1523,(0,1):3,(1,0):2783,(1,1):92	0:2857,1:21	(0,0):1129,(0,1):36,(1,0):2368,(1,1):187	0:2440,1:151	chr4	-	205299205299	208795208795
458	Actn	chrX:1924248:1924401:-@chrX:1922698:1922783:-@chrX:1921968:1922060:-	se	0.76	0.59	0.92	0.27	0.18	0.38	0.49	1.40047e+09	'chrX:1924248:1924401:-@chrX:1922698:1922783:-@chrX:1921968:1922060:-.A.dn_chrX:1924248:1924401:-@chrX:1922698:1922783:-@chrX:1921968:1922060:-.A.se_chrX:1924248:1924401:-@chrX:1922698:1922783:-@chrX:1921968:1922060:-.A.up','chrX:1924248:1924401:-@chrX:1922698:1922783:-@chrX:1921968:1922060:-.B.dn_chrX:1924248:1924401:-@chrX:1922698:1922783:-@chrX:1921968:1922060:-.B.up'	(0,0):987,(1,0):58,(1,1):42	0:80,1:20	(0,0):4129,(1,0):28,(1,1):73	0:44,1:57	chrX	-	19219681921968	19244011924401
459	UQCR-11	chr3LHet:606350:606441:+@chr3LHet:607074:607205:+	ri	0.95	0.93	0.97	0.45	0.41	0.49	0.5	1000000000000	'chr3LHet:606350:606441:+@chr3LHet:607074:607205:+.A.withRI','chr3LHet:606350:606441:+@chr3LHet:607074:607205:+.B.up_chr3LHet:606350:606441:+@chr3LHet:607074:607205:+.B.dn'	(0,0):2708,(0,1):12,(1,0):3408,(1,1):10	0:3418,1:12	(0,0):1119,(0,1):152,(1,0):1531,(1,1):10	0:1536,1:157	chr3LHet	+	606350606350	607205607205
460	CG2316	chr4:210624:210685:-@chr4:208623:208795:-	ri	0.89	0.75	0.98	0.34	0.29	0.4	0.55	1000000000000	'chr4:210624:210685:-@chr4:208623:208795:-.A.withRI','chr4:210624:210685:-@chr4:208623:208795:-.B.dn_chr4:210624:210685:-@chr4:208623:208795:-.B.up'	(0,0):1429,(1,0):2170,(1,1):78	1.56111	(0,0):1163,(1,0):1666,(1,1):166	0:1714,1:118	chr4	-	208623208623	210685210685
461	Pu	chr2R:17062780:17063178:+@chr2R:17067443:17067652:+	ri	0.79	0.65	0.94	0.13	0.11	0.15	0.66	1000000000000	'chr2R:17062780:17063178:+@chr2R:17067443:17067652:+.A.withRI','chr2R:17062780:17063178:+@chr2R:17067443:17067652:+.B.up_chr2R:17062780:17063178:+@chr2R:17067443:17067652:+.B.dn'	(0,0):146,(0,1):3,(1,0):395,(1,1):31	0:421,1:8	(0,0):154,(0,1):43,(1,0):313,(1,1):193	0:335,1:214	chr2R	+	1706278017062780	1706765217067650
462	lt	chr2L:22820170:22820497:+@chr2L:22831506:22831574:+@chr2L:22832086:22832272:+	se	0.86	0.74	0.94	0.2	0.12	0.3	0.66	1000000000000	'chr2L:22820170:22820497:+@chr2L:22831506:22831574:+@chr2L:22832086:22832272:+.A.up_chr2L:22820170:22820497:+@chr2L:22831506:22831574:+@chr2L:22832086:22832272:+.A.se_chr2L:22820170:22820497:+@chr2L:22831506:22831574:+@chr2L:22832086:22832272:+.A.dn','chr2L:22820170:22820497:+@chr2L:22831506:22831574:+@chr2L:22832086:22832272:+.B.up_chr2L:22820170:22820497:+@chr2L:22831506:22831574:+@chr2L:228320…	(0,0):547,(0,1):5,(1,0):74,(1,1):149	0:198,1:30	(0,0):373,(0,1):18,(1,0):17,(1,1):225	0:71,1:189	chr2L	+	2282017022820170	2283227222832270
463	Cpr49Ac	chr2R:8274887:8275022:+@chr2R:8275418:8275444:+@chr2R:8275805:8275955:+	se	0.96	0.95	0.98	0.16	0.1	0.23	0.8	1000000000000	'chr2R:8274887:8275022:+@chr2R:8275418:8275444:+@chr2R:8275805:8275955:+.A.up_chr2R:8274887:8275022:+@chr2R:8275418:8275444:+@chr2R:8275805:8275955:+.A.se_chr2R:8274887:8275022:+@chr2R:8275418:8275444:+@chr2R:8275805:8275955:+.A.dn','chr2R:8274887:8275022:+@chr2R:8275418:8275444:+@chr2R:8275805:8275955:+.B.up_chr2R:8274887:8275022:+@chr2R:8275418:8275444:+@chr2R:8275805:8275955:+.B.dn'	(0,0):1721,(0,1):15,(1,0):745,(1,1):460	0:1189,1:31	(0,0):581,(0,1):63,(1,0):22,(1,1):113	0:32,1:166	chr2R	+	82748878274887	82759558275955
	gene	event_name	type	oregonR_posterior_mean	oregonR_ci_low	oregonR_ci_high	smn_posterior_mean	smn_ci_low	smn_ci_high	diff	bayes_factor	isoforms	oregonR_counts	oregonR_assigned_counts	smn_counts	smn_assigned_counts	chrom	strand	mRNA_starts	mRNA_ends
1	Cpr49Ac	chr2R:8276023:8276038:+@chr2R:8276428:8276591:+	ri	0.03	0.03	0.04	0.67	0.58	0.77	-0.64	1000000000000	'chr2R:8276023:8276038:+@chr2R:8276428:8276591:+.A.withRI','chr2R:8276023:8276038:+@chr2R:8276428:8276591:+.B.up_chr2R:8276023:8276038:+@chr2R:8276428:8276591:+.B.dn'	(0,0):1055,(0,1):136,(1,0):202,(1,1):369	0:217,1:490	(0,0):304,(0,1):13,(1,0):723,(1,1):47	0:746,1:37	chr2R	+	82760238276023	82765918276591
2	CG7149	chr2L:7787031:7786990|7786701:-@chr2L:7786157:7786424:-	a5ss	0.27	0.18	0.38	0.89	0.78	0.97	-0.62	1000000000000	'chr2L:7787031:7786990|7786701:-@chr2L:7786157:7786424:-.A.dn_chr2L:7787031:7786990|7786701:-@chr2L:7786157:7786424:-.A.coreAndExt','chr2L:7787031:7786990|7786701:-@chr2L:7786157:7786424:-.B.dn_chr2L:7787031:7786990|7786701:-@chr2L:7786157:7786424:-.B.core'	(0,0):116,(0,1):14,(1,0):42,(1,1):38	0:51,1:43	(0,0):262,(0,1):3,(1,0):137,(1,1):11	0:147,1:4	chr2L	-	77861577786157	77870317787031
3	CG11151, Grip91	chrX:13633777:13633893:+@chrX:13633982:13634145:+	ri	0.12	0.11	0.14	0.72	0.69	0.75	-0.6	1000000000000	'chrX:13633777:13633893:+@chrX:13633982:13634145:+.A.withRI','chrX:13633777:13633893:+@chrX:13633982:13634145:+.B.up_chrX:13633777:13633893:+@chrX:13633982:13634145:+.B.dn'	(0,0):3910,(0,1):744,(1,0):331,(1,1):1247	0:480,1:1842	(0,0):3545,(0,1):287,(1,0):1606,(1,1):303	0:1825,1:371	chrX	+	1363377713633770	1363414513634140
4	RpS21	chr2L:2856377:2856572:+@chr2L:2856631:2856672:+	ri	0.39	0.37	0.42	0.99	0.98	1	-0.6	1000000000000	'chr2L:2856377:2856572:+@chr2L:2856631:2856672:+.A.withRI','chr2L:2856377:2856572:+@chr2L:2856631:2856672:+.B.up_chr2L:2856377:2856572:+@chr2L:2856631:2856672:+.B.dn'	(0,0):7765,(1,0):1186,(1,1):4364	0:2957,1:2593	(0,0):4140,(1,0):3976,(1,1):5270	0:9244,1:2	chr2L	+	28563772856377	28566722856672
5	RpL22	chrX:657474:657827:-@chrX:657116:657266:-	ri	0.31	0.25	0.39	0.89	0.78	0.96	-0.58	1000000000000	'chrX:657474:657827:-@chrX:657116:657266:-.A.withRI','chrX:657474:657827:-@chrX:657116:657266:-.B.dn_chrX:657474:657827:-@chrX:657116:657266:-.B.up'	(0,0):242,(0,1):2,(1,0):92,(1,1):440	0:203,1:331	(0,0):307,(0,1):2,(1,0):209,(1,1):281	0:468,1:24	chrX	-	657116657116	657827657827
6	CG33057, mkg-p	chr3L:8398314:8398372:-@chr3L:8397203:8397610:-	ri	0.39	0.3	0.49	0.97	0.93	0.99	-0.58	1000000000000	'chr3L:8398314:8398372:-@chr3L:8397203:8397610:-.A.withRI','chr3L:8398314:8398372:-@chr3L:8397203:8397610:-.B.dn_chr3L:8398314:8398372:-@chr3L:8397203:8397610:-.B.up'	(0,0):23,(0,1):14,(1,0):95,(1,1):65	0:121,1:53	(0,0):25,(0,1):5,(1,0):734,(1,1):39	0:772,1:6	chr3L	-	83972038397203	83983728398372
7	CG16700	chrX:16989446:16989597:+@chrX:16990318:16990678:+	ri	0.12	0.05	0.2	0.7	0.56	0.85	-0.58	1000000000000	'chrX:16989446:16989597:+@chrX:16990318:16990678:+.A.withRI','chrX:16989446:16989597:+@chrX:16990318:16990678:+.B.up_chrX:16989446:16989597:+@chrX:16990318:16990678:+.B.dn'	(0,0):15,(0,1):11,(1,0):12,(1,1):32	0:17,1:38	(0,0):34,(0,1):6,(1,0):117,(1,1):42	0:149,1:16	chrX	+	1698944616989440	1699067816990670
8	RpS21	chr2L:2856392:2856568:+@chr2L:2856631:2856672:+	ri	0.2	0.19	0.21	0.77	0.75	0.79	-0.57	1000000000000	'chr2L:2856392:2856568:+@chr2L:2856631:2856672:+.A.withRI','chr2L:2856392:2856568:+@chr2L:2856631:2856672:+.B.up_chr2L:2856392:2856568:+@chr2L:2856631:2856672:+.B.dn'	(0,0):5515,(0,1):1281,(1,0):1112,(1,1):3032	0:1684,1:3741	(0,0):4857,(0,1):186,(1,0):3509,(1,1):3646	0:6407,1:934	chr2L	+	28563922856392	28566722856672
9	CG7149	chr2L:7786990:7787031:-@chr2L:7786157:7786424:-	ri	0.4	0.3	0.51	0.92	0.84	0.97	-0.52	1000000000000	'chr2L:7786990:7787031:-@chr2L:7786157:7786424:-.A.withRI','chr2L:7786990:7787031:-@chr2L:7786157:7786424:-.B.dn_chr2L:7786990:7787031:-@chr2L:7786157:7786424:-.B.up'	(0,0):28,(0,1):14,(1,0):130,(1,1):38	0:143,1:39	(0,0):55,(0,1):3,(1,0):344,(1,1):11	0:355,1:3	chr2L	-	77861577786157	77870317787031
10	hbs	chr2R:10898902:10899335:+@chr2R:10923486:10924013:+	ri	0.45	0.32	0.64	0.96	0.91	0.99	-0.51	30462.4	'chr2R:10898902:10899335:+@chr2R:10923486:10924013:+.A.withRI','chr2R:10898902:10899335:+@chr2R:10923486:10924013:+.B.up_chr2R:10898902:10899335:+@chr2R:10923486:10924013:+.B.dn'	(0,0):8,(0,1):4,(1,0):463,(1,1):27	0:474,1:20	(0,0):48,(0,1):3,(1,0):3062,(1,1):15	0:3075,1:5	chr2R	+	1089890210898900	1092401310924010
11	JTBR	chr3L:1802804:1802835:-@chr3L:1802008:1802743:-	ri	0.34	0.25	0.44	0.82	0.71	0.9	-0.48	1000000000000	'chr3L:1802804:1802835:-@chr3L:1802008:1802743:-.A.withRI','chr3L:1802804:1802835:-@chr3L:1802008:1802743:-.B.dn_chr3L:1802804:1802835:-@chr3L:1802008:1802743:-.B.up'	(0,0):44,(0,1):41,(1,0):36,(1,1):389	0:163,1:303	(0,0):42,(0,1):10,(1,0):74,(1,1):257	0:291,1:50	chr3L	-	18020081802008	18028351802835
12	CG8176	chr3R:5348017:5348436:+@chr3R:5349258:5349518:+	ri	0.39	0.29	0.49	0.87	0.78	0.94	-0.48	1000000000000	'chr3R:5348017:5348436:+@chr3R:5349258:5349518:+.A.withRI','chr3R:5348017:5348436:+@chr3R:5349258:5349518:+.B.up_chr3R:5348017:5348436:+@chr3R:5349258:5349518:+.B.dn'	(0,0):65,(0,1):7,(1,0):80,(1,1):107	0:112,1:82	(0,0):97,(0,1):5,(1,0):231,(1,1):86	0:312,1:10	chr3R	+	53480175348017	53495185349518
13	CG8004	chr3L:19920671:19921380:-@chr3L:19920283:19920369:-	ri	0.48	0.4	0.58	0.96	0.89	0.99	-0.48	1000000000000	'chr3L:19920671:19921380:-@chr3L:19920283:19920369:-.A.withRI','chr3L:19920671:19921380:-@chr3L:19920283:19920369:-.B.dn_chr3L:19920671:19921380:-@chr3L:19920283:19920369:-.B.up'	(0,0):51,(0,1):6,(1,0):122,(1,1):471	0:355,1:244	(0,0):76,(1,0):341,(1,1):622	0:916,1:47	chr3L	-	1992028319920280	1992138019921380
14	Rcc1	chr3L:5925625:5925767:-@chr3L:5924718:5925417:-	ri	0.37	0.29	0.49	0.85	0.76	0.93	-0.48	1000000000000	'chr3L:5925625:5925767:-@chr3L:5924718:5925417:-.A.withRI','chr3L:5925625:5925767:-@chr3L:5924718:5925417:-.B.dn_chr3L:5925625:5925767:-@chr3L:5924718:5925417:-.B.up'	(0,0):111,(0,1):1,(1,0):58,(1,1):485	0:283,1:261	(0,0):147,(0,1):3,(1,0):225,(1,1):609	0:760,1:77	chr3L	-	59247185924718	59257675925767
15	CG32736, CG42308	chrX:6905394:6905441:+@chrX:6905527:6905789:+	ri	0.07	0.03	0.13	0.54	0.46	0.61	-0.47	1000000000000	'chrX:6905394:6905441:+@chrX:6905527:6905789:+.A.withRI','chrX:6905394:6905441:+@chrX:6905527:6905789:+.B.up_chrX:6905394:6905441:+@chrX:6905527:6905789:+.B.dn'	(0,0):58,(0,1):28,(1,0):7,(1,1):90	0:18,1:107	(0,0):146,(0,1):55,(1,0):160,(1,1):124	0:229,1:110	chrX	+	69053946905394	69057896905789
16	vig2	chr3R:20949180:20949205:+@chr3R:20949354:20949837:+	ri	0.28	0.24	0.31	0.74	0.7	0.78	-0.46	1000000000000	'chr3R:20949180:20949205:+@chr3R:20949354:20949837:+.A.withRI','chr3R:20949180:20949205:+@chr3R:20949354:20949837:+.B.up_chr3R:20949180:20949205:+@chr3R:20949354:20949837:+.B.dn'	(0,0):239,(0,1):113,(1,0):267,(1,1):1544	0:670,1:1254	(0,0):131,(0,1):41,(1,0):1030,(1,1):2402	0:2827,1:646	chr3R	+	2094918020949180	2094983720949830
17	Lsd-1	chr3R:19589954:19590038:+@chr3R:19590108:19590406:+	ri	0.01	0.01	0.02	0.46	0.43	0.5	-0.45	1000000000000	'chr3R:19589954:19590038:+@chr3R:19590108:19590406:+.A.withRI','chr3R:19589954:19590038:+@chr3R:19590108:19590406:+.B.up_chr3R:19589954:19590038:+@chr3R:19590108:19590406:+.B.dn'	(0,0):330,(0,1):321,(1,0):13,(1,1):1108	0:29,1:1413	(0,0):160,(0,1):187,(1,0):497,(1,1):889	0:866,1:707	chr3R	+	1958995419589950	1959040619590400
18	REG	chrX:13106389:13106425:+@chrX:13106483:13106991:+	ri	0.13	0.09	0.19	0.58	0.5	0.67	-0.45	1000000000000	'chrX:13106389:13106425:+@chrX:13106483:13106991:+.A.withRI','chrX:13106389:13106425:+@chrX:13106483:13106991:+.B.up_chrX:13106389:13106425:+@chrX:13106483:13106991:+.B.dn'	(0,0):365,(0,1):9,(1,0):28,(1,1):1234	0:162,1:1109	(0,0):551,(0,1):3,(1,0):185,(1,1):1887	0:1312,1:763	chrX	+	1310638913106380	1310699113106990
19	Aats-gly	chr3L:15088282:15088285:+@chr3L:15088355:15090790:+	ri	0.1	0.05	0.18	0.54	0.42	0.68	-0.44	1000000000000	'chr3L:15088282:15088285:+@chr3L:15088355:15090790:+.A.withRI','chr3L:15088282:15088285:+@chr3L:15088355:15090790:+.B.up_chr3L:15088282:15088285:+@chr3L:15088355:15090790:+.B.dn'	(0,0):125,(1,0):7,(1,1):2616	0:410,1:2213	(0,0):207,(1,0):66,(1,1):3978	0:2040,1:2004	chr3L	+	1508828215088280	1509079015090790
20	Dhap-at	chr3R:21315924:21315992:-@chr3R:21314246:21314825:-	ri	0.15	0.08	0.24	0.59	0.44	0.78	-0.44	12407.5	'chr3R:21315924:21315992:-@chr3R:21314246:21314825:-.A.withRI','chr3R:21315924:21315992:-@chr3R:21314246:21314825:-.B.dn_chr3R:21315924:21315992:-@chr3R:21314246:21314825:-.B.up'	(0,0):15,(0,1):1,(1,0):16,(1,1):48	0:25,1:40	(0,0):22,(1,0):104,(1,1):73	0:154,1:23	chr3R	-	2131424621314240	2131599221315990
21	CG11876	chr3R:24938789:24938862:+@chr3R:24938931:24939171:+	ri	0.07	0.05	0.09	0.47	0.43	0.51	-0.4	1000000000000	'chr3R:24938789:24938862:+@chr3R:24938931:24939171:+.A.withRI','chr3R:24938789:24938862:+@chr3R:24938931:24939171:+.B.up_chr3R:24938789:24938862:+@chr3R:24938931:24939171:+.B.dn'	(0,0):257,(0,1):144,(1,0):32,(1,1):442	0:61,1:557	(0,0):484,(0,1):152,(1,0):392,(1,1):674	0:730,1:488	chr3R	+	2493878924938780	2493917124939170
22	dUTPase	chr2L:11011335:11011379:+@chr2L:11011472:11012138:+	ri	0.51	0.46	0.56	0.9	0.84	0.94	-0.39	1000000000000	'chr2L:11011335:11011379:+@chr2L:11011472:11012138:+.A.withRI','chr2L:11011335:11011379:+@chr2L:11011472:11012138:+.B.up_chr2L:11011335:11011379:+@chr2L:11011472:11012138:+.B.dn'	(0,0):99,(0,1):111,(1,0):297,(1,1):1743	0:1160,1:991	(0,0):66,(0,1):12,(1,0):208,(1,1):506	0:653,1:73	chr2L	+	1101133511011330	1101213811012130
23	EfTuM, mip120	chr2R:9395087:9395163:+@chr2R:9395220:9396130:+	ri	0.08	0.05	0.12	0.46	0.42	0.5	-0.38	1000000000000	'chr2R:9395087:9395163:+@chr2R:9395220:9396130:+.A.withRI','chr2R:9395087:9395163:+@chr2R:9395220:9396130:+.B.up_chr2R:9395087:9395163:+@chr2R:9395220:9396130:+.B.dn'	(0,0):212,(0,1):106,(1,0):21,(1,1):1558	0:123,1:1562	(0,0):604,(0,1):185,(1,0):335,(1,1):4172	0:2274,1:2418	chr2R	+	93950879395087	93961309396130
24	alphaCOP	chr3L:1645170:1645223:-@chr3L:1644012:1645061:-	ri	0.39	0.3	0.47	0.76	0.7	0.81	-0.37	1000000000000	'chr3L:1645170:1645223:-@chr3L:1644012:1645061:-.A.withRI','chr3L:1645170:1645223:-@chr3L:1644012:1645061:-.B.dn_chr3L:1645170:1645223:-@chr3L:1644012:1645061:-.B.up'	(0,0):78,(0,1):41,(1,0):68,(1,1):877	0:469,1:517	(0,0):89,(0,1):48,(1,0):282,(1,1):1275	0:1197,1:408	chr3L	-	16440121644012	16452231645223
25	TpnC47D	chr2R:7162956:7163298:-@chr2R:7162395:7162569:-	ri	0.43	0.36	0.52	0.8	0.7	0.89	-0.37	1000000000000	'chr2R:7162956:7163298:-@chr2R:7162395:7162569:-.A.withRI','chr2R:7162956:7163298:-@chr2R:7162395:7162569:-.B.dn_chr2R:7162956:7163298:-@chr2R:7162395:7162569:-.B.up'	(0,0):1100,(0,1):2,(1,0):174,(1,1):332	0:318,1:190	(0,0):1950,(0,1):5,(1,0):325,(1,1):283	0:547,1:66	chr2R	-	71623957162395	71632987163298
26	CG9691	chrX:9778475:9778901:+@chrX:9778971:9779079:+	ri	0.56	0.53	0.59	0.93	0.91	0.94	-0.37	1000000000000	'chrX:9778475:9778901:+@chrX:9778971:9779079:+.A.withRI','chrX:9778475:9778901:+@chrX:9778971:9779079:+.B.up_chrX:9778475:9778901:+@chrX:9778971:9779079:+.B.dn'	(0,0):76,(0,1):306,(1,0):823,(1,1):2811	0:2404,1:1536	(0,0):51,(0,1):111,(1,0):2313,(1,1):3217	0:5302,1:339	chrX	+	97784759778475	97790799779079
27	Mtch	chr3L:184665:184669:+@chr3L:184775:185074:+	ri	0.64	0.51	0.79	0.99	0.97	1	-0.35	3.32973e+08	'chr3L:184665:184669:+@chr3L:184775:185074:+.A.withRI','chr3L:184665:184669:+@chr3L:184775:185074:+.B.up_chr3L:184665:184669:+@chr3L:184775:185074:+.B.dn'	(0,0):220,(1,0):140,(1,1):243	0:293,1:90	(0,0):311,(1,0):498,(1,1):257	0:751,1:4	chr3L	+	184665184665	185074185074
28	Abi	chr3R:9948085:9948138:-@chr3R:9947468:9947834:-	ri	0.25	0.17	0.34	0.59	0.47	0.76	-0.34	210994	'chr3R:9948085:9948138:-@chr3R:9947468:9947834:-.A.withRI','chr3R:9948085:9948138:-@chr3R:9947468:9947834:-.B.dn_chr3R:9948085:9948138:-@chr3R:9947468:9947834:-.B.up'	(0,0):103,(1,0):34,(1,1):130	0:59,1:105	(0,0):156,(1,0):116,(1,1):177	0:203,1:90	chr3R	-	99474689947468	99481389948138
29	CG10625	chr3L:5533591:5533659:-@chr3L:5533276:5533348:-@chr3L:5532404:5532953:-	se	0.28	0.19	0.38	0.62	0.56	0.68	-0.34	1000000000000	'chr3L:5533591:5533659:-@chr3L:5533276:5533348:-@chr3L:5532404:5532953:-.A.dn_chr3L:5533591:5533659:-@chr3L:5533276:5533348:-@chr3L:5532404:5532953:-.A.se_chr3L:5533591:5533659:-@chr3L:5533276:5533348:-@chr3L:5532404:5532953:-.A.up','chr3L:5533591:5533659:-@chr3L:5533276:5533348:-@chr3L:5532404:5532953:-.B.dn_chr3L:5533591:5533659:-@chr3L:5533276:5533348:-@chr3L:5532404:5532953:-.B.up'	(0,0):1218,(1,0):37,(1,1):809	0:291,1:555	(0,0):7561,(1,0):420,(1,1):3736	0:2779,1:1377	chr3L	-	55324045532404	55336595533659
30	CG8369	chr3R:4647666:4647847:+@chr3R:4648191:4648388:+	ri	0.08	0.08	0.09	0.42	0.39	0.45	-0.34	1000000000000	'chr3R:4647666:4647847:+@chr3R:4648191:4648388:+.A.withRI','chr3R:4647666:4647847:+@chr3R:4648191:4648388:+.B.up_chr3R:4647666:4647847:+@chr3R:4648191:4648388:+.B.dn'	(0,0):2243,(0,1):2913,(1,0):1020,(1,1):1563	0:1160,1:4336	(0,0):353,(0,1):275,(1,0):829,(1,1):321	0:966,1:459	chr3R	+	46476664647666	46483884648388
31	cnc	chr3R:19044971:19043601|19035705:-@chr3R:19035330:19035605:-	a5ss	0.08	0.06	0.09	0.42	0.38	0.47	-0.34	1000000000000	'chr3R:19044971:19043601|19035705:-@chr3R:19035330:19035605:-.A.dn_chr3R:19044971:19043601|19035705:-@chr3R:19035330:19035605:-.A.coreAndExt','chr3R:19044971:19043601|19035705:-@chr3R:19035330:19035605:-.B.dn_chr3R:19044971:19043601|19035705:-@chr3R:19035330:19035605:-.B.core'	(0,0):176,(0,1):50,(1,0):180,(1,1):364	0:200,1:394	(0,0):448,(0,1):47,(1,0):1306,(1,1):471	0:1496,1:328	chr3R	-	1903533019035330	1904497119044970
32	loj	chr3L:6088066:6088117:+@chr3L:6088213:6088443:+	ri	0.3	0.24	0.35	0.64	0.58	0.71	-0.34	1000000000000	'chr3L:6088066:6088117:+@chr3L:6088213:6088443:+.A.withRI','chr3L:6088066:6088117:+@chr3L:6088213:6088443:+.B.up_chr3L:6088066:6088117:+@chr3L:6088213:6088443:+.B.dn'	(0,0):104,(0,1):85,(1,0):113,(1,1):158	0:154,1:202	(0,0):54,(0,1):51,(1,0):272,(1,1):149	0:367,1:105	chr3L	+	60880666088066	60884436088443
33	CG9331	chr2L:20824594:20824724:+@chr2L:20825272:20825512:+	ri	0.3	0.2	0.43	0.64	0.54	0.76	-0.34	183.42	'chr2L:20824594:20824724:+@chr2L:20825272:20825512:+.A.withRI','chr2L:20824594:20824724:+@chr2L:20825272:20825512:+.B.up_chr2L:20824594:20824724:+@chr2L:20825272:20825512:+.B.dn'	(0,0):60,(0,1):8,(1,0):41,(1,1):30	0:50,1:29	(0,0):187,(0,1):5,(1,0):327,(1,1):141	0:424,1:49	chr2L	+	2082459420824590	2082551220825510
34	Aats-gly	chr3L:15088282:15088285:+@chr3L:15088374:15090790:+	ri	0.09	0.04	0.15	0.43	0.33	0.52	-0.34	1000000000000	'chr3L:15088282:15088285:+@chr3L:15088374:15090790:+.A.withRI','chr3L:15088282:15088285:+@chr3L:15088374:15090790:+.B.up_chr3L:15088282:15088285:+@chr3L:15088374:15090790:+.B.dn'	(0,0):117,(0,1):8,(1,0):8,(1,1):2615	0:305,1:2326	(0,0):196,(0,1):11,(1,0):76,(1,1):3968	0:1966,1:2089	chr3L	+	1508828215088280	1509079015090790
35	CG32425	chr3L:20503132:20503879:+@chr3L:20505037:20505485:+	ri	0.38	0.34	0.41	0.72	0.68	0.76	-0.34	1000000000000	'chr3L:20503132:20503879:+@chr3L:20505037:20505485:+.A.withRI','chr3L:20503132:20503879:+@chr3L:20505037:20505485:+.B.up_chr3L:20503132:20503879:+@chr3L:20505037:20505485:+.B.dn'	(0,0):228,(0,1):12,(1,0):742,(1,1):1679	0:1438,1:995	(0,0):274,(0,1):29,(1,0):1606,(1,1):1727	0:2816,1:546	chr3L	+	2050313220503130	2050548520505480
36	Mtch	chr3L:184665:184728:+@chr3L:185367:185739:+	ri	0.61	0.55	0.68	0.95	0.87	0.99	-0.34	1000000000000	'chr3L:184665:184728:+@chr3L:185367:185739:+.A.withRI','chr3L:184665:184728:+@chr3L:185367:185739:+.B.up_chr3L:184665:184728:+@chr3L:185367:185739:+.B.dn'	(0,0):719,(1,0):845,(1,1):519	0:1202,1:162	(0,0):1171,(1,0):1174,(1,1):446	0:1579,1:41	chr3L	+	184665184665	185739185739
37	ave, Rpn6	chr2R:10640298:10640415:-@chr2R:10639221:10639545:-	ri	0.63	0.57	0.7	0.96	0.91	0.98	-0.33	1000000000000	'chr2R:10640298:10640415:-@chr2R:10639221:10639545:-.A.withRI','chr2R:10640298:10640415:-@chr2R:10639221:10639545:-.B.dn_chr2R:10640298:10640415:-@chr2R:10639221:10639545:-.B.up'	(0,0):215,(0,1):9,(1,0):1005,(1,1):490	0:1328,1:176	(0,0):165,(0,1):3,(1,0):971,(1,1):198	0:1163,1:9	chr2R	-	1063922110639220	1064041510640410
38	CG3209	chr2R:19957523:19957765:+@chr2R:19959514:19959747:+	ri	0.14	0.13	0.16	0.46	0.4	0.52	-0.32	1000000000000	'chr2R:19957523:19957765:+@chr2R:19959514:19959747:+.A.withRI','chr2R:19957523:19957765:+@chr2R:19959514:19959747:+.B.up_chr2R:19957523:19957765:+@chr2R:19959514:19959747:+.B.dn'	(0,0):1169,(0,1):65,(1,0):508,(1,1):480	0:584,1:469	(0,0):1127,(0,1):21,(1,0):752,(1,1):214	0:839,1:148	chr2R	+	1995752319957520	1995974719959740
39	Atg18a	chr3L:8182942:8183069:+@chr3L:8183151:8183537:+	ri	0.35	0.27	0.44	0.67	0.57	0.77	-0.32	1.11544e+07	'chr3L:8182942:8183069:+@chr3L:8183151:8183537:+.A.withRI','chr3L:8182942:8183069:+@chr3L:8183151:8183537:+.B.up_chr3L:8182942:8183069:+@chr3L:8183151:8183537:+.B.dn'	(0,0):100,(0,1):8,(1,0):49,(1,1):303	0:119,1:241	(0,0):66,(0,1):8,(1,0):87,(1,1):222	0:223,1:94	chr3L	+	81829428182942	81835378183537
40	Spf45	chr2L:22959877:22960833:-@chr2L:22959601:22959809:-	ri	0.62	0.49	0.74	0.94	0.87	0.98	-0.32	5.12988e+06	'chr2L:22959877:22960833:-@chr2L:22959601:22959809:-.A.withRI','chr2L:22959877:22960833:-@chr2L:22959601:22959809:-.B.dn_chr2L:22959877:22960833:-@chr2L:22959601:22959809:-.B.up'	(0,0):120,(0,1):5,(1,0):58,(1,1):745	0:492,1:316	(0,0):144,(0,1):2,(1,0):147,(1,1):899	0:990,1:58	chr2L	-	2295960122959600	2296083322960830
41	Cul4	chr2R:3990113:3990411:-@chr2R:3989765:3990049:-	ri	0.55	0.42	0.69	0.87	0.76	0.95	-0.32	25.28	'chr2R:3990113:3990411:-@chr2R:3989765:3990049:-.A.withRI','chr2R:3990113:3990411:-@chr2R:3989765:3990049:-.B.dn_chr2R:3990113:3990411:-@chr2R:3989765:3990049:-.B.up'	(0,0):32,(0,1):12,(1,0):37,(1,1):115	0:96,1:68	(0,0):69,(0,1):2,(1,0):75,(1,1):213	0:266,1:24	chr2R	-	39897653989765	39904113990411
42	CG7394	chr3L:11555837:11555837:+@chr3L:11555961:11556200:+	ri	0.06	0.04	0.09	0.38	0.28	0.49	-0.32	1000000000000	'chr3L:11555837:11555837:+@chr3L:11555961:11556200:+.A.withRI','chr3L:11555837:11555837:+@chr3L:11555961:11556200:+.B.up_chr3L:11555837:11555837:+@chr3L:11555961:11556200:+.B.dn'	(0,0):225,(0,1):2,(1,0):20,(1,1):206	0:34,1:194	(0,0):218,(0,1):1,(1,0):82,(1,1):133	0:137,1:79	chr3L	+	1155583711555830	1155620011556200
43	Su(var)205	chr2L:8210979:8211237:-@chr2L:8210730:8210861:-	ri	0.12	0.1	0.15	0.44	0.39	0.48	-0.32	1000000000000	'chr2L:8210979:8211237:-@chr2L:8210730:8210861:-.A.withRI','chr2L:8210979:8211237:-@chr2L:8210730:8210861:-.B.dn_chr2L:8210979:8211237:-@chr2L:8210730:8210861:-.B.up'	(0,0):278,(0,1):200,(1,0):75,(1,1):239	0:91,1:423	(0,0):191,(0,1):127,(1,0):269,(1,1):168	0:306,1:258	chr2L	-	82107308210730	82112378211237
44	CG7115	chr2L:7821534:7821648:+@chr2L:7822676:7823100:+	ri	0.26	0.19	0.34	0.58	0.45	0.72	-0.32	1.37147e+06	'chr2L:7821534:7821648:+@chr2L:7822676:7823100:+.A.withRI','chr2L:7821534:7821648:+@chr2L:7822676:7823100:+.B.up_chr2L:7821534:7821648:+@chr2L:7822676:7823100:+.B.dn'	(0,0):80,(0,1):4,(1,0):88,(1,1):107	0:123,1:76	(0,0):120,(0,1):4,(1,0):163,(1,1):82	0:202,1:47	chr2L	+	78215347821534	78231007823100
45	DIP1	chrX:21501058:21501001|21499388:-@chrX:21497340:21497917:-	a5ss	0.54	0.48	0.61	0.86	0.78	0.95	-0.32	1000000000000	'chrX:21501058:21501001|21499388:-@chrX:21497340:21497917:-.A.dn_chrX:21501058:21501001|21499388:-@chrX:21497340:21497917:-.A.coreAndExt','chrX:21501058:21501001|21499388:-@chrX:21497340:21497917:-.B.dn_chrX:21501058:21501001|21499388:-@chrX:21497340:21497917:-.B.core'	(0,0):176,(0,1):1,(1,0):697,(1,1):346	0:907,1:137	(0,0):403,(1,0):1778,(1,1):558	0:2267,1:69	chrX	-	2149734021497340	2150105821501050
46	Myb	chrX:15751674:15751694:-@chrX:15749823:15751578:-	ri	0.26	0.16	0.39	0.57	0.44	0.71	-0.31	17.41	'chrX:15751674:15751694:-@chrX:15749823:15751578:-.A.withRI','chrX:15751674:15751694:-@chrX:15749823:15751578:-.B.dn_chrX:15751674:15751694:-@chrX:15749823:15751578:-.B.up'	(0,0):130,(0,1):7,(1,0):24,(1,1):1374	0:603,1:802	(0,0):100,(0,1):5,(1,0):61,(1,1):1598	0:931,1:733	chrX	-	1574982315749820	1575169415751690
47	CG9684	chr3R:4186023:4186228:-@chr3R:4185680:4185968:-	ri	0.07	0.02	0.16	0.38	0.25	0.54	-0.31	4161.1	'chr3R:4186023:4186228:-@chr3R:4185680:4185968:-.A.withRI','chr3R:4186023:4186228:-@chr3R:4185680:4185968:-.B.dn_chr3R:4186023:4186228:-@chr3R:4185680:4185968:-.B.up'	(0,0):22,(0,1):39,(1,0):4,(1,1):43	0:7,1:79	(0,0):10,(0,1):19,(1,0):20,(1,1):52	0:43,1:48	chr3R	-	41856804185680	41862284186228
48	Rpn2	chr3R:24979164:24979330:+@chr3R:24979418:24980395:+	ri	0.35	0.3	0.41	0.66	0.6	0.72	-0.31	1000000000000	'chr3R:24979164:24979330:+@chr3R:24979418:24980395:+.A.withRI','chr3R:24979164:24979330:+@chr3R:24979418:24980395:+.B.up_chr3R:24979164:24979330:+@chr3R:24979418:24980395:+.B.dn'	(0,0):139,(0,1):76,(1,0):118,(1,1):1671	0:674,1:1191	(0,0):261,(0,1):51,(1,0):224,(1,1):1555	0:1251,1:579	chr3R	+	2497916424979160	2498039524980390
49	Art3	chr3R:11054956:11055103:-@chr3R:11053327:11054901:-	ri	0.12	0.04	0.24	0.43	0.31	0.58	-0.31	31.55	'chr3R:11054956:11055103:-@chr3R:11053327:11054901:-.A.withRI','chr3R:11054956:11055103:-@chr3R:11053327:11054901:-.B.dn_chr3R:11054956:11055103:-@chr3R:11053327:11054901:-.B.up'	(0,0):40,(0,1):3,(1,0):4,(1,1):598	0:53,1:552	(0,0):53,(0,1):3,(1,0):24,(1,1):552	0:236,1:343	chr3R	-	1105332711053320	1105510311055100
50	Unc-89	chr2R:19898446:19898504:-@chr2R:19897094:19898306:-@chr2R:19895357:19895668:-	se	0.06	0.02	0.16	0.37	0.19	0.64	-0.31	67.11	'chr2R:19898446:19898504:-@chr2R:19897094:19898306:-@chr2R:19895357:19895668:-.A.dn_chr2R:19898446:19898504:-@chr2R:19897094:19898306:-@chr2R:19895357:19895668:-.A.se_chr2R:19898446:19898504:-@chr2R:19897094:19898306:-@chr2R:19895357:19895668:-.A.up','chr2R:19898446:19898504:-@chr2R:19897094:19898306:-@chr2R:19895357:19895668:-.B.dn_chr2R:19898446:19898504:-@chr2R:19897094:19898306:-@chr2R:198953…	(0,0):32,(1,0):4,(1,1):14	0:7,1:11	(0,0):114,(1,0):32,(1,1):14	0:35,1:11	chr2R	-	1989535719895350	1989850419898500
51	Herp	chr2L:7799846:7799833|7799309:-@chr2L:7798163:7798623:-	a5ss	0.68	0.61	0.75	0.99	0.98	1	-0.31	1000000000000	'chr2L:7799846:7799833|7799309:-@chr2L:7798163:7798623:-.A.dn_chr2L:7799846:7799833|7799309:-@chr2L:7798163:7798623:-.A.coreAndExt','chr2L:7799846:7799833|7799309:-@chr2L:7798163:7798623:-.B.dn_chr2L:7799846:7799833|7799309:-@chr2L:7798163:7798623:-.B.core'	(0,0):158,(1,0):840,(1,1):660	0:1310,1:190	(0,0):260,(1,0):1644,(1,1):644	0:2285,1:3	chr2L	-	77981637798163	77998467799846
52	PCB	chr2R:5748030:5748327:-@chr2R:5747875:5747957:-	ri	0.44	0.39	0.49	0.75	0.7	0.79	-0.31	1000000000000	'chr2R:5748030:5748327:-@chr2R:5747875:5747957:-.A.withRI','chr2R:5748030:5748327:-@chr2R:5747875:5747957:-.B.dn_chr2R:5748030:5748327:-@chr2R:5747875:5747957:-.B.up'	(0,0):368,(0,1):131,(1,0):248,(1,1):455	0:441,1:393	(0,0):1136,(0,1):50,(1,0):573,(1,1):988	0:1253,1:358	chr2R	-	57478755747875	57483275748327
53	CG4630	chr2R:9106593:9106722:-@chr2R:9105094:9105704:-	ri	0.06	0.03	0.1	0.36	0.24	0.52	-0.3	1.1556e+07	'chr2R:9106593:9106722:-@chr2R:9105094:9105704:-.A.withRI','chr2R:9106593:9106722:-@chr2R:9105094:9105704:-.B.dn_chr2R:9106593:9106722:-@chr2R:9105094:9105704:-.B.up'	(0,0):46,(0,1):13,(1,0):13,(1,1):113	0:23,1:116	(0,0):27,(0,1):6,(1,0):36,(1,1):45	0:45,1:42	chr2R	-	91050949105094	91067229106722
54	Lgr4, CG32641	chrX:13078498:13078553:+@chrX:13078607:13079210:+	ri	0.47	0.39	0.54	0.77	0.72	0.81	-0.3	1000000000000	'chrX:13078498:13078553:+@chrX:13078607:13079210:+.A.withRI','chrX:13078498:13078553:+@chrX:13078607:13079210:+.B.up_chrX:13078498:13078553:+@chrX:13078607:13079210:+.B.dn'	(0,0):3,(0,1):62,(1,0):109,(1,1):931	0:494,1:608	(0,0):2,(0,1):71,(1,0):357,(1,1):1010	0:1116,1:322	chrX	+	1307849813078490	1307921013079210
55	CG15445	chrX:20988189:20988431:+@chrX:20988486:20988642:+	ri	0.51	0.36	0.64	0.81	0.69	0.9	-0.3	58.82	'chrX:20988189:20988431:+@chrX:20988486:20988642:+.A.withRI','chrX:20988189:20988431:+@chrX:20988486:20988642:+.B.up_chrX:20988189:20988431:+@chrX:20988486:20988642:+.B.dn'	(0,0):53,(0,1):6,(1,0):36,(1,1):85	0:68,1:59	(0,0):86,(1,0):77,(1,1):125	0:171,1:31	chrX	+	2098818920988180	2098864220988640
56	CG33199, CG8229	chr2R:4838296:4838211|4837351:-@chr2R:4835938:4836446:-	a5ss	0.27	0.24	0.29	0.57	0.54	0.6	-0.3	1000000000000	'chr2R:4838296:4838211|4837351:-@chr2R:4835938:4836446:-.A.dn_chr2R:4838296:4838211|4837351:-@chr2R:4835938:4836446:-.A.coreAndExt','chr2R:4838296:4838211|4837351:-@chr2R:4835938:4836446:-.B.dn_chr2R:4838296:4838211|4837351:-@chr2R:4835938:4836446:-.B.core'	(0,0):595,(0,1):133,(1,0):644,(1,1):850	0:887,1:740	(0,0):1609,(0,1):161,(1,0):2149,(1,1):1186	0:2845,1:651	chr2R	-	48359384835938	48382964838296
57	Mf	chr3R:11001906:11002015:-@chr3R:10999859:11000065:-	ri	0.47	0.44	0.49	0.77	0.75	0.79	-0.3	1000000000000	'chr3R:11001906:11002015:-@chr3R:10999859:11000065:-.A.withRI','chr3R:11001906:11002015:-@chr3R:10999859:11000065:-.B.dn_chr3R:11001906:11002015:-@chr3R:10999859:11000065:-.B.up'	(0,0):1697,(0,1):366,(1,0):6628,(1,1):206	0:6723,1:477	(0,0):4684,(0,1):409,(1,0):26285,(1,1):308	0:26510,1:492	chr3R	-	1099985910999850	1100201511002010
58	Cyp4d1	chrX:2055614:2056232:-@chrX:2053658:2054281:-	ri	0.12	0.11	0.12	0.42	0.4	0.45	-0.3	1000000000000	'chrX:2055614:2056232:-@chrX:2053658:2054281:-.A.withRI','chrX:2055614:2056232:-@chrX:2053658:2054281:-.B.dn_chrX:2055614:2056232:-@chrX:2053658:2054281:-.B.up'	(0,0):1806,(0,1):1574,(1,0):2183,(1,1):11497	0:3491,1:11763	(0,0):825,(0,1):152,(1,0):1525,(1,1):2361	0:2565,1:1473	chrX	-	20536582053658	20562322056232
59	Taf12	chr3R:7505289:7505397:-@chr3R:7504099:7504594:-	ri	0.58	0.48	0.69	0.88	0.78	0.96	-0.3	5907.32	'chr3R:7505289:7505397:-@chr3R:7504099:7504594:-.A.withRI','chr3R:7505289:7505397:-@chr3R:7504099:7504594:-.B.dn_chr3R:7505289:7505397:-@chr3R:7504099:7504594:-.B.up'	(0,0):165,(1,0):244,(1,1):251	0:393,1:102	(0,0):201,(0,1):1,(1,0):311,(1,1):190	0:484,1:18	chr3R	-	75040997504099	75053977505397
60	sra	chr3R:12012695:12013021:+@chr3R:12021757:12023357:+	ri	0.01	0.01	0.01	0.3	0.29	0.32	-0.29	1000000000000	'chr3R:12012695:12013021:+@chr3R:12021757:12023357:+.A.withRI','chr3R:12012695:12013021:+@chr3R:12021757:12023357:+.B.up_chr3R:12012695:12013021:+@chr3R:12021757:12023357:+.B.dn'	(0,0):103,(0,1):56,(1,0):43,(1,1):991	0:50,1:1040	(0,0):480,(0,1):139,(1,0):3358,(1,1):1956	0:3912,1:1541	chr3R	+	1201269512012690	1202335712023350
61	Myb	chrX:15751683:15751694:-@chrX:15749823:15751578:-	ri	0.28	0.18	0.38	0.57	0.44	0.71	-0.29	250.26	'chrX:15751683:15751694:-@chrX:15749823:15751578:-.A.withRI','chrX:15751683:15751694:-@chrX:15749823:15751578:-.B.dn_chrX:15751683:15751694:-@chrX:15749823:15751578:-.B.up'	(0,0):137,(1,0):24,(1,1):1374	0:408,1:990	(0,0):105,(1,0):61,(1,1):1598	0:913,1:746	chrX	-	1574982315749820	1575169415751690
62	CG42666	chrX:1744653:1746854:+@chrX:1747475:1747660:+	ri	0.61	0.47	0.78	0.9	0.8	0.96	-0.29	12.68	'chrX:1744653:1746854:+@chrX:1747475:1747660:+.A.withRI','chrX:1744653:1746854:+@chrX:1747475:1747660:+.B.up_chrX:1744653:1746854:+@chrX:1747475:1747660:+.B.dn'	(0,0):27,(1,0):65,(1,1):382	0:296,1:151	(0,0):50,(0,1):1,(1,0):194,(1,1):684	0:826,1:53	chrX	+	17446531744653	17476601747660
63	PlexA	chr4:1034944:1035152:-@chr4:1034259:1034394:-	ri	0.04	0.02	0.06	0.33	0.25	0.44	-0.29	1000000000000	'chr4:1034944:1035152:-@chr4:1034259:1034394:-.A.withRI','chr4:1034944:1035152:-@chr4:1034259:1034394:-.B.dn_chr4:1034944:1035152:-@chr4:1034259:1034394:-.B.up'	(0,0):68,(0,1):38,(1,0):18,(1,1):76	0:19,1:113	(0,0):86,(0,1):12,(1,0):79,(1,1):43	0:95,1:39	chr4	-	10342591034259	10351521035152
64	Rpn13	chr2R:9846710:9846903:-@chr2R:9846033:9846604:-	ri	0.35	0.32	0.39	0.64	0.61	0.68	-0.29	1000000000000	'chr2R:9846710:9846903:-@chr2R:9846033:9846604:-.A.withRI','chr2R:9846710:9846903:-@chr2R:9846033:9846604:-.B.dn_chr2R:9846710:9846903:-@chr2R:9846033:9846604:-.B.up'	(0,0):162,(0,1):214,(1,0):292,(1,1):1568	0:738,1:1336	(0,0):138,(0,1):136,(1,0):562,(1,1):1382	0:1448,1:632	chr2R	-	98460339846033	98469039846903
65	kermit	chr2R:4036813:4036940:-@chr2R:4034422:4035900:-	ri	0.24	0.2	0.29	0.53	0.48	0.58	-0.29	1000000000000	'chr2R:4036813:4036940:-@chr2R:4034422:4035900:-.A.withRI','chr2R:4036813:4036940:-@chr2R:4034422:4035900:-.B.dn_chr2R:4036813:4036940:-@chr2R:4034422:4035900:-.B.up'	(0,0):55,(0,1):16,(1,0):153,(1,1):925	0:362,1:732	(0,0):193,(0,1):12,(1,0):575,(1,1):1622	0:1422,1:787	chr2R	-	40344224034422	40369404036940
66	Mtch	chr3L:184665:185307|184728:+@chr3L:185367:185739:+	a5ss	0.68	0.61	0.76	0.97	0.91	1	-0.29	1000000000000	'chr3L:184665:185307|184728:+@chr3L:185367:185739:+.A.coreAndExt_chr3L:184665:185307|184728:+@chr3L:185367:185739:+.A.dn','chr3L:184665:185307|184728:+@chr3L:185367:185739:+.B.core_chr3L:184665:185307|184728:+@chr3L:185367:185739:+.B.dn'	(0,0):714,(1,0):850,(1,1):519	0:1227,1:142	(0,0):1176,(1,0):1169,(1,1):446	0:1595,1:20	chr3L	+	184665184665	185739185739
67	CG4887	chr2L:1175047:1175173:+@chr2L:1175287:1175523:+	ri	0.1	0.05	0.18	0.38	0.24	0.52	-0.28	4358.32	'chr2L:1175047:1175173:+@chr2L:1175287:1175523:+.A.withRI','chr2L:1175047:1175173:+@chr2L:1175287:1175523:+.B.up_chr2L:1175047:1175173:+@chr2L:1175287:1175523:+.B.dn'	(0,0):31,(0,1):20,(1,0):7,(1,1):31	0:7,1:51	(0,0):51,(0,1):16,(1,0):26,(1,1):23	0:32,1:33	chr2L	+	11750471175047	11755231175523
68	Rbp1-like	chrX:13278333:13278990:-@chrX:13274660:13275076:-	ri	0.33	0.29	0.37	0.61	0.56	0.66	-0.28	1000000000000	'chrX:13278333:13278990:-@chrX:13274660:13275076:-.A.withRI','chrX:13278333:13278990:-@chrX:13274660:13275076:-.B.dn_chrX:13278333:13278990:-@chrX:13274660:13275076:-.B.up'	(0,0):46,(0,1):31,(1,0):452,(1,1):316	0:552,1:247	(0,0):101,(0,1):22,(1,0):1449,(1,1):566	0:1786,1:251	chrX	-	1327466013274660	1327899013278990
69	CG32425	chr3L:20502734:20503060:+@chr3L:20503130:20503879:+	ri	0.05	0.03	0.08	0.33	0.28	0.38	-0.28	1000000000000	'chr3L:20502734:20503060:+@chr3L:20503130:20503879:+.A.withRI','chr3L:20502734:20503060:+@chr3L:20503130:20503879:+.B.up_chr3L:20502734:20503060:+@chr3L:20503130:20503879:+.B.dn'	(0,0):97,(0,1):126,(1,0):14,(1,1):1617	0:56,1:1701	(0,0):115,(0,1):180,(1,0):142,(1,1):1664	0:594,1:1392	chr3L	+	2050273420502730	2050387920503870
70	whd	chr2R:6365865:6366184:-@chr2R:6360774:6360955:-	ri	0.17	0.14	0.22	0.45	0.35	0.55	-0.28	1.46769e+09	'chr2R:6365865:6366184:-@chr2R:6360774:6360955:-.A.withRI','chr2R:6365865:6366184:-@chr2R:6360774:6360955:-.B.dn_chr2R:6365865:6366184:-@chr2R:6360774:6360955:-.B.up'	(0,0):317,(0,1):26,(1,0):235,(1,1):52	0:246,1:67	(0,0):378,(0,1):10,(1,0):480,(1,1):48	0:501,1:37	chr2R	-	63607746360774	63661846366184
71	CG11779	chr3R:14982188:14982268:-@chr3R:14981587:14982124:-	ri	0.21	0.12	0.33	0.48	0.39	0.57	-0.27	497.7	'chr3R:14982188:14982268:-@chr3R:14981587:14982124:-.A.withRI','chr3R:14982188:14982268:-@chr3R:14981587:14982124:-.B.dn_chr3R:14982188:14982268:-@chr3R:14981587:14982124:-.B.up'	(0,0):52,(0,1):10,(1,0):11,(1,1):220	0:75,1:166	(0,0):173,(0,1):33,(1,0):89,(1,1):452	0:286,1:288	chr3R	-	1498158714981580	1498226814982260
72	CG13319	chr2R:8811324:8811856:+@chr2R:8811927:8812157:+	ri	0.08	0.04	0.13	0.35	0.27	0.44	-0.27	1000000000000	'chr2R:8811324:8811856:+@chr2R:8811927:8812157:+.A.withRI','chr2R:8811324:8811856:+@chr2R:8811927:8812157:+.B.up_chr2R:8811324:8811856:+@chr2R:8811927:8812157:+.B.dn'	(0,0):85,(0,1):21,(1,0):8,(1,1):398	0:48,1:379	(0,0):81,(0,1):17,(1,0):50,(1,1):443	0:183,1:327	chr2R	+	88113248811324	88121578812157
73	Muted, CG7071	chr3R:18188619:18188668:+@chr3R:18188729:18189009:+	ri	0.07	0.03	0.12	0.34	0.26	0.43	-0.27	8.98586e+07	'chr3R:18188619:18188668:+@chr3R:18188729:18189009:+.A.withRI','chr3R:18188619:18188668:+@chr3R:18188729:18189009:+.B.up_chr3R:18188619:18188668:+@chr3R:18188729:18189009:+.B.dn'	(0,0):33,(0,1):50,(1,0):8,(1,1):133	0:19,1:172	(0,0):45,(0,1):34,(1,0):50,(1,1):171	0:113,1:142	chr3R	+	1818861918188610	1818900918189000
74	Sod2	chr2R:12661369:12661399:-@chr2R:12660421:12661143:-	ri	0.28	0.24	0.31	0.55	0.51	0.59	-0.27	1000000000000	'chr2R:12661369:12661399:-@chr2R:12660421:12661143:-.A.withRI','chr2R:12661369:12661399:-@chr2R:12660421:12661143:-.B.dn_chr2R:12661369:12661399:-@chr2R:12660421:12661143:-.B.up'	(0,0):559,(1,0):260,(1,1):2335	0:880,1:1715	(0,0):1562,(0,1):6,(1,0):967,(1,1):4289	0:3310,1:1952	chr2R	-	1266042112660420	1266139912661390
75	sra	chr3R:12012695:12013021:+@chr3R:12021753:12023357:+	ri	0.01	0	0.01	0.27	0.26	0.28	-0.26	1000000000000	'chr3R:12012695:12013021:+@chr3R:12021753:12023357:+.A.withRI','chr3R:12012695:12013021:+@chr3R:12021753:12023357:+.B.up_chr3R:12012695:12013021:+@chr3R:12021753:12023357:+.B.dn'	(0,0):44,(0,1):115,(1,0):36,(1,1):998	0:40,1:1109	(0,0):303,(0,1):316,(1,0):3353,(1,1):1961	0:3847,1:1783	chr3R	+	1201269512012690	1202335712023350
76	CG7115	chr2L:7821534:7821642:+@chr2L:7822642:7823100:+	ri	0.24	0.18	0.31	0.5	0.39	0.62	-0.26	704.75	'chr2L:7821534:7821642:+@chr2L:7822642:7823100:+.A.withRI','chr2L:7821534:7821642:+@chr2L:7822642:7823100:+.B.up_chr2L:7821534:7821642:+@chr2L:7822642:7823100:+.B.dn'	(0,0):78,(0,1):6,(1,0):79,(1,1):116	0:113,1:88	(0,0):115,(0,1):9,(1,0):153,(1,1):92	0:197,1:57	chr2L	+	78215347821534	78231007823100
77	lola	chr2R:6419544:6419624:-@chr2R:6392364:6393578:-	ri	0.27	0.24	0.3	0.53	0.47	0.59	-0.26	1000000000000	'chr2R:6419544:6419624:-@chr2R:6392364:6393578:-.A.withRI','chr2R:6419544:6419624:-@chr2R:6392364:6393578:-.B.dn_chr2R:6419544:6419624:-@chr2R:6392364:6393578:-.B.up'	(0,0):387,(0,1):37,(1,0):2597,(1,1):360	0:2692,1:302	(0,0):581,(0,1):17,(1,0):3580,(1,1):252	0:3693,1:156	chr2R	-	63923646392364	64196246419624
78	MSBP	chrX:15784028:15784161:-@chrX:15783335:15783765:-	ri	0.17	0.15	0.2	0.43	0.4	0.47	-0.26	1000000000000	'chrX:15784028:15784161:-@chrX:15783335:15783765:-.A.withRI','chrX:15784028:15784161:-@chrX:15783335:15783765:-.B.dn_chrX:15784028:15784161:-@chrX:15783335:15783765:-.B.up'	(0,0):1021,(0,1):102,(1,0):290,(1,1):2046	0:636,1:1802	(0,0):954,(0,1):113,(1,0):581,(1,1):1399	0:1166,1:927	chrX	-	1578333515783330	1578416115784160
79	CG13784	chr2L:7219860:7220029:-@chr2L:7218909:7219130:-	ri	0.68	0.59	0.78	0.94	0.9	0.97	-0.26	1000000000000	'chr2L:7219860:7220029:-@chr2L:7218909:7219130:-.A.withRI','chr2L:7219860:7220029:-@chr2L:7218909:7219130:-.B.dn_chr2L:7219860:7220029:-@chr2L:7218909:7219130:-.B.up'	(0,0):18,(0,1):18,(1,0):255,(1,1):29	0:273,1:29	(0,0):27,(0,1):8,(1,0):770,(1,1):24	0:793,1:9	chr2L	-	72189097218909	72200297220029
80	dUTPase	chr2L:11011335:11011418|11011379:+@chr2L:11011472:11012138:+	a5ss	0.1	0.07	0.13	0.36	0.24	0.5	-0.26	59211.5	'chr2L:11011335:11011418|11011379:+@chr2L:11011472:11012138:+.A.coreAndExt_chr2L:11011335:11011418|11011379:+@chr2L:11011472:11012138:+.A.dn','chr2L:11011335:11011418|11011379:+@chr2L:11011472:11012138:+.B.core_chr2L:11011335:11011418|11011379:+@chr2L:11011472:11012138:+.B.dn'	(0,0):371,(0,1):111,(1,0):25,(1,1):1743	0:224,1:1655	(0,0):254,(0,1):12,(1,0):20,(1,1):506	0:134,1:404	chr2L	+	1101133511011330	1101213811012130
81	CG34179, slmo, CG12393	chr2L:6048134:6048418:-@chr2L:6046654:6047780:-	ri	0.27	0.23	0.31	0.52	0.48	0.56	-0.25	1000000000000	'chr2L:6048134:6048418:-@chr2L:6046654:6047780:-.A.withRI','chr2L:6048134:6048418:-@chr2L:6046654:6047780:-.B.dn_chr2L:6048134:6048418:-@chr2L:6046654:6047780:-.B.up'	(0,0):190,(0,1):3,(1,0):184,(1,1):2367	0:854,1:1700	(0,0):495,(0,1):11,(1,0):707,(1,1):4542	0:3146,1:2114	chr2L	-	60466546046654	60484186048418
82	CG32640, Lgr4	chrX:13071986:13072080:+@chrX:13072134:13072716:+	ri	0.54	0.46	0.62	0.79	0.74	0.83	-0.25	7.15143e+06	'chrX:13071986:13072080:+@chrX:13072134:13072716:+.A.withRI','chrX:13071986:13072080:+@chrX:13072134:13072716:+.B.up_chrX:13071986:13072080:+@chrX:13072134:13072716:+.B.dn'	(0,0):2,(0,1):37,(1,0):95,(1,1):796	0:520,1:408	(0,0):1,(0,1):57,(1,0):314,(1,1):879	0:1024,1:226	chrX	+	1307198613071980	1307271613072710
83	UQCR-6.4	chr2R:13460241:13460280:-@chr2R:13459773:13460028:-	ri	0.75	0.67	0.83	1	0.98	1	-0.25	1000000000000	'chr2R:13460241:13460280:-@chr2R:13459773:13460028:-.A.withRI','chr2R:13460241:13460280:-@chr2R:13459773:13460028:-.B.dn_chr2R:13460241:13460280:-@chr2R:13459773:13460028:-.B.up'	(0,0):1028,(1,0):821,(1,1):544	0:1202,1:163	(0,0):1233,(1,0):1748,(1,1):385	1.48125	chr2R	-	1345977313459770	1346028013460280
84	CG17746	chr3L:3239242:3239391:-@chr3L:3238612:3238982:-	ri	0.14	0.08	0.21	0.39	0.31	0.49	-0.25	1071.99	'chr3L:3239242:3239391:-@chr3L:3238612:3238982:-.A.withRI','chr3L:3239242:3239391:-@chr3L:3238612:3238982:-.B.dn_chr3L:3239242:3239391:-@chr3L:3238612:3238982:-.B.up'	(0,0):82,(0,1):3,(1,0):20,(1,1):176	0:44,1:155	(0,0):154,(0,1):3,(1,0):92,(1,1):283	0:219,1:159	chr3L	-	32386123238612	32393913239391
85	MSBP	chrX:15784065:15784161:-@chrX:15783335:15783765:-	ri	0.15	0.13	0.17	0.4	0.37	0.44	-0.25	1000000000000	'chrX:15784065:15784161:-@chrX:15783335:15783765:-.A.withRI','chrX:15784065:15784161:-@chrX:15783335:15783765:-.B.dn_chrX:15784065:15784161:-@chrX:15783335:15783765:-.B.up'	(0,0):1057,(0,1):66,(1,0):294,(1,1):2042	0:570,1:1832	(0,0):1010,(0,1):57,(1,0):585,(1,1):1395	0:1164,1:873	chrX	-	1578333515783330	1578416115784160
86	sgg	chrX:2567208:2568954|2567651:+@chrX:2571134:2571198:+	a5ss	0.16	0.13	0.19	0.41	0.36	0.48	-0.25	1000000000000	'chrX:2567208:2568954|2567651:+@chrX:2571134:2571198:+.A.coreAndExt_chrX:2567208:2568954|2567651:+@chrX:2571134:2571198:+.A.dn','chrX:2567208:2568954|2567651:+@chrX:2571134:2571198:+.B.core_chrX:2567208:2568954|2567651:+@chrX:2571134:2571198:+.B.dn'	(0,0):1356,(0,1):3,(1,0):183,(1,1):278	0:227,1:237	(0,0):2484,(0,1):5,(1,0):466,(1,1):258	0:579,1:150	chrX	+	25672082567208	25711982571198
87	CG6950	chr3R:7647629:7647833:-@chr3R:7647002:7647555:-	ri	0.07	0.03	0.12	0.31	0.24	0.39	-0.24	1.89677e+08	'chr3R:7647629:7647833:-@chr3R:7647002:7647555:-.A.withRI','chr3R:7647629:7647833:-@chr3R:7647002:7647555:-.B.dn_chr3R:7647629:7647833:-@chr3R:7647002:7647555:-.B.up'	(0,0):243,(0,1):4,(1,0):8,(1,1):722	0:45,1:689	(0,0):393,(0,1):14,(1,0):66,(1,1):1151	0:459,1:772	chr3R	-	76470027647002	76478337647833
88	Ref1	chr3R:2905686:2906192:-@chr3R:2904976:2905177:-	ri	0.09	0.08	0.1	0.33	0.31	0.36	-0.24	1000000000000	'chr3R:2905686:2906192:-@chr3R:2904976:2905177:-.A.withRI','chr3R:2905686:2906192:-@chr3R:2904976:2905177:-.B.dn_chr3R:2905686:2906192:-@chr3R:2904976:2905177:-.B.up'	(0,0):112,(0,1):409,(1,0):181,(1,1):1117	0:287,1:1420	(0,0):317,(0,1):390,(1,0):912,(1,1):1552	0:1403,1:1451	chr3R	-	29049762904976	29061922906192
89	CG33199, CG8229	chr2R:4838211:4838296:-@chr2R:4835938:4836446:-	ri	0.2	0.18	0.21	0.44	0.42	0.47	-0.24	1000000000000	'chr2R:4838211:4838296:-@chr2R:4835938:4836446:-.A.withRI','chr2R:4838211:4838296:-@chr2R:4835938:4836446:-.B.dn_chr2R:4838211:4838296:-@chr2R:4835938:4836446:-.B.up'	(0,0):318,(0,1):133,(1,0):921,(1,1):850	0:1097,1:807	(0,0):708,(0,1):161,(1,0):3050,(1,1):1186	0:3573,1:824	chr2R	-	48359384835938	48382964838296
90	CG11073	chr2R:17986487:17987019:-@chr2R:17979647:17980222:-	ri	0.34	0.26	0.44	0.58	0.51	0.64	-0.24	61.06	'chr2R:17986487:17987019:-@chr2R:17979647:17980222:-.A.withRI','chr2R:17986487:17987019:-@chr2R:17979647:17980222:-.B.dn_chr2R:17986487:17987019:-@chr2R:17979647:17980222:-.B.up'	(0,0):44,(1,0):157,(1,1):69	0:182,1:44	(0,0):198,(1,0):1419,(1,1):359	0:1615,1:163	chr2R	-	1797964717979640	1798701917987010
91	CG6891	chrX:18673683:18673878:+@chrX:18674714:18675037:+	ri	0.01	0	0.01	0.25	0.19	0.33	-0.24	1000000000000	'chrX:18673683:18673878:+@chrX:18674714:18675037:+.A.withRI','chrX:18673683:18673878:+@chrX:18674714:18675037:+.B.up_chrX:18673683:18673878:+@chrX:18674714:18675037:+.B.dn'	(0,0):1073,(0,1):2,(1,0):23,(1,1):1267	0:35,1:1257	(0,0):166,(1,0):86,(1,1):132	0:110,1:108	chrX	+	1867368318673680	1867503718675030
92	CG7115	chr2L:7821534:7821648:+@chr2L:7822642:7823100:+	ri	0.23	0.17	0.3	0.46	0.36	0.56	-0.23	73.97	'chr2L:7821534:7821648:+@chr2L:7822642:7823100:+.A.withRI','chr2L:7821534:7821648:+@chr2L:7822642:7823100:+.B.up_chr2L:7821534:7821648:+@chr2L:7822642:7823100:+.B.dn'	(0,0):76,(0,1):8,(1,0):78,(1,1):117	0:111,1:92	(0,0):110,(0,1):14,(1,0):153,(1,1):92	0:198,1:61	chr2L	+	78215347821534	78231007823100
93	CG6145	chr2R:9434020:9434521:-@chr2R:9429666:9430068:-@chr2R:9426477:9426854:-	se	0.59	0.5	0.68	0.82	0.76	0.87	-0.23	888.32	'chr2R:9434020:9434521:-@chr2R:9429666:9430068:-@chr2R:9426477:9426854:-.A.dn_chr2R:9434020:9434521:-@chr2R:9429666:9430068:-@chr2R:9426477:9426854:-.A.se_chr2R:9434020:9434521:-@chr2R:9429666:9430068:-@chr2R:9426477:9426854:-.A.up','chr2R:9434020:9434521:-@chr2R:9429666:9430068:-@chr2R:9426477:9426854:-.B.dn_chr2R:9434020:9434521:-@chr2R:9429666:9430068:-@chr2R:9426477:9426854:-.B.up'	(0,0):259,(0,1):24,(1,0):114,(1,1):171	0:197,1:112	(0,0):824,(0,1):31,(1,0):396,(1,1):358	0:698,1:87	chr2R	-	94264779426477	94345219434521
94	Mtch	chr3L:184665:184681:+@chr3L:184775:185074:+	ri	0.76	0.62	0.92	0.99	0.98	1	-0.23	14.51	'chr3L:184665:184681:+@chr3L:184775:185074:+.A.withRI','chr3L:184665:184681:+@chr3L:184775:185074:+.B.up_chr3L:184665:184681:+@chr3L:184775:185074:+.B.dn'	(0,0):220,(1,0):140,(1,1):243	0:329,1:54	(0,0):311,(1,0):498,(1,1):257	0.524306	chr3L	+	184665184665	185074185074
95	CG32137	chr3L:13932353:13932558:+@chr3L:13934391:13934575:+	ri	0.24	0.2	0.29	0.47	0.41	0.54	-0.23	1000000000000	'chr3L:13932353:13932558:+@chr3L:13934391:13934575:+.A.withRI','chr3L:13932353:13932558:+@chr3L:13934391:13934575:+.B.up_chr3L:13932353:13932558:+@chr3L:13934391:13934575:+.B.dn'	(0,0):83,(0,1):38,(1,0):287,(1,1):71	0:305,1:91	(0,0):118,(0,1):38,(1,0):679,(1,1):74	0:715,1:76	chr3L	+	1393235313932350	1393457513934570
96	Unc-89	chr2R:19898446:19898504:-@chr2R:19895357:19895668:-	ri	0.06	0.02	0.13	0.29	0.16	0.5	-0.23	20.99	'chr2R:19898446:19898504:-@chr2R:19895357:19895668:-.A.withRI','chr2R:19898446:19898504:-@chr2R:19895357:19895668:-.B.dn_chr2R:19898446:19898504:-@chr2R:19895357:19895668:-.B.up'	(0,0):28,(1,0):8,(1,1):14	0:9,1:13	(0,0):90,(1,0):56,(1,1):14	0:58,1:12	chr2R	-	1989535719895350	1989850419898500
97	sca	chr2R:8671854:8672247:+@chr2R:8686765:8687295:+	ri	0.06	0.04	0.08	0.28	0.15	0.47	-0.22	118	'chr2R:8671854:8672247:+@chr2R:8686765:8687295:+.A.withRI','chr2R:8671854:8672247:+@chr2R:8686765:8687295:+.B.up_chr2R:8671854:8672247:+@chr2R:8686765:8687295:+.B.dn'	(0,0):6,(0,1):23,(1,0):76,(1,1):42	0:79,1:62	(0,0):3,(0,1):4,(1,0):63,(1,1):8	0:64,1:11	chr2R	+	86718548671854	86872958687295
98	Hus1-like	chr3R:637730:637705|636394:-@chr3R:634084:634996:-	a5ss	0.02	0	0.03	0.24	0.12	0.38	-0.22	394.82	'chr3R:637730:637705|636394:-@chr3R:634084:634996:-.A.dn_chr3R:637730:637705|636394:-@chr3R:634084:634996:-.A.coreAndExt','chr3R:637730:637705|636394:-@chr3R:634084:634996:-.B.dn_chr3R:637730:637705|636394:-@chr3R:634084:634996:-.B.core'	(0,0):28,(0,1):5,(1,0):3,(1,1):143	0:7,1:144	(0,0):19,(1,0):17,(1,1):45	0:21,1:41	chr3R	-	634084634084	637730637730
99	CG34179, slmo	chr2L:6047900:6047941:-@chr2L:6046654:6047780:-	ri	0.29	0.25	0.34	0.51	0.48	0.54	-0.22	1000000000000	'chr2L:6047900:6047941:-@chr2L:6046654:6047780:-.A.withRI','chr2L:6047900:6047941:-@chr2L:6046654:6047780:-.B.dn_chr2L:6047900:6047941:-@chr2L:6046654:6047780:-.B.up'	(0,0):60,(0,1):117,(1,0):137,(1,1):2337	0:947,1:1644	(0,0):174,(0,1):318,(1,0):656,(1,1):4514	0:3023,1:2465	chr2L	-	60466546046654	60479416047941
100	DIP1	chrX:21499875:21500596:-@chrX:21499388:21499781:-	ri	0.32	0.24	0.41	0.54	0.45	0.62	-0.22	87.18	'chrX:21499875:21500596:-@chrX:21499388:21499781:-.A.withRI','chrX:21499875:21500596:-@chrX:21499388:21499781:-.B.dn_chrX:21499875:21500596:-@chrX:21499388:21499781:-.B.up'	(0,0):72,(0,1):23,(1,0):36,(1,1):405	0:132,1:332	(0,0):197,(0,1):23,(1,0):110,(1,1):969	0:567,1:535	chrX	-	2149938821499380	2150059621500590
101	Ge-1	chr2L:11100658:11100866:-@chr2L:11100294:11100574:-	ri	0.03	0.01	0.08	0.25	0.18	0.35	-0.22	314624	'chr2L:11100658:11100866:-@chr2L:11100294:11100574:-.A.withRI','chr2L:11100658:11100866:-@chr2L:11100294:11100574:-.B.dn_chr2L:11100658:11100866:-@chr2L:11100294:11100574:-.B.up'	(0,0):10,(0,1):31,(1,0):1,(1,1):70	0:2,1:100	(0,0):26,(0,1):32,(1,0):27,(1,1):110	0:57,1:112	chr2L	-	1110029411100290	1110086611100860
102	CG10077	chr3L:6946873:6948269:-@chr3L:6944367:6944545:-	ri	0.46	0.43	0.49	0.68	0.65	0.7	-0.22	1000000000000	'chr3L:6946873:6948269:-@chr3L:6944367:6944545:-.A.withRI','chr3L:6946873:6948269:-@chr3L:6944367:6944545:-.B.dn_chr3L:6946873:6948269:-@chr3L:6944367:6944545:-.B.up'	(0,0):334,(0,1):82,(1,0):1516,(1,1):1723	0:2306,1:1015	(0,0):555,(0,1):195,(1,0):3740,(1,1):2300	0:5296,1:939	chr3L	-	69443676944367	69482696948269
103	pst	chr3L:7351960:7352154:-@chr3L:7351791:7351880:-	ri	0.14	0.1	0.19	0.36	0.32	0.41	-0.22	1000000000000	'chr3L:7351960:7352154:-@chr3L:7351791:7351880:-.A.withRI','chr3L:7351960:7352154:-@chr3L:7351791:7351880:-.B.dn_chr3L:7351960:7352154:-@chr3L:7351791:7351880:-.B.up'	(0,0):456,(1,0):38,(1,1):262	0:68,1:232	(0,0):815,(1,0):281,(1,1):656	0:466,1:471	chr3L	-	73517917351791	73521547352154
104	Vha55	chr3R:8453362:8453491:-@chr3R:8453171:8453283:-	ri	0.15	0.13	0.17	0.36	0.34	0.38	-0.21	1000000000000	'chr3R:8453362:8453491:-@chr3R:8453171:8453283:-.A.withRI','chr3R:8453362:8453491:-@chr3R:8453171:8453283:-.B.dn_chr3R:8453362:8453491:-@chr3R:8453171:8453283:-.B.up'	(0,0):726,(0,1):43,(1,0):200,(1,1):899	0:272,1:870	(0,0):1106,(0,1):190,(1,0):1595,(1,1):2803	0:2354,1:2234	chr3R	-	84531718453171	84534918453491
105	jvl	chr3R:10619443:10619610:+@chr3R:10620251:10620784:+	ri	0.29	0.23	0.37	0.5	0.43	0.58	-0.21	821.89	'chr3R:10619443:10619610:+@chr3R:10620251:10620784:+.A.withRI','chr3R:10619443:10619610:+@chr3R:10620251:10620784:+.B.up_chr3R:10619443:10619610:+@chr3R:10620251:10620784:+.B.dn'	(0,0):68,(0,1):31,(1,0):84,(1,1):152	0:143,1:124	(0,0):132,(0,1):31,(1,0):180,(1,1):169	0:279,1:101	chr3R	+	1061944310619440	1062078410620780
106	CG12375	chr2L:8126757:8126897:-@chr2L:8125630:8126698:-	ri	0.04	0.02	0.06	0.25	0.21	0.3	-0.21	1000000000000	'chr2L:8126757:8126897:-@chr2L:8125630:8126698:-.A.withRI','chr2L:8126757:8126897:-@chr2L:8125630:8126698:-.B.dn_chr2L:8126757:8126897:-@chr2L:8125630:8126698:-.B.up'	(0,0):56,(0,1):137,(1,0):12,(1,1):2103	0:77,1:2175	(0,0):46,(0,1):118,(1,0):85,(1,1):1814	0:530,1:1487	chr2L	-	81256308125630	81268978126897
107	AkhR	chr2L:6712347:6712675:-@chr2L:6711341:6711742:-	ri	0.08	0.06	0.11	0.29	0.23	0.36	-0.21	1000000000000	'chr2L:6712347:6712675:-@chr2L:6711341:6711742:-.A.withRI','chr2L:6712347:6712675:-@chr2L:6711341:6711742:-.B.dn_chr2L:6712347:6712675:-@chr2L:6711341:6711742:-.B.up'	(0,0):102,(0,1):89,(1,0):41,(1,1):266	0:58,1:338	(0,0):44,(0,1):38,(1,0):77,(1,1):135	0:113,1:137	chr2L	-	67113416711341	67126756712675
108	bic	chr2R:8757760:8757834:+@chr2R:8757908:8759608:+	ri	0.04	0.03	0.05	0.25	0.24	0.27	-0.21	1000000000000	'chr2R:8757760:8757834:+@chr2R:8757908:8759608:+.A.withRI','chr2R:8757760:8757834:+@chr2R:8757908:8759608:+.B.up_chr2R:8757760:8757834:+@chr2R:8757908:8759608:+.B.dn'	(0,0):1824,(0,1):64,(1,0):53,(1,1):18568	0:766,1:17919	(0,0):3415,(0,1):63,(1,0):717,(1,1):37067	0:9638,1:28209	chr2R	+	87577608757760	87596088759608
109	Cchl	chr3R:17852882:17853155:-@chr3R:17852170:17852764:-	ri	0.38	0.31	0.47	0.59	0.54	0.65	-0.21	220819	'chr3R:17852882:17853155:-@chr3R:17852170:17852764:-.A.withRI','chr3R:17852882:17853155:-@chr3R:17852170:17852764:-.B.dn_chr3R:17852882:17853155:-@chr3R:17852170:17852764:-.B.up'	(0,0):193,(0,1):11,(1,0):78,(1,1):801	0:383,1:507	(0,0):419,(0,1):50,(1,0):348,(1,1):1791	0:1356,1:833	chr3R	-	1785217017852170	1785315517853150
110	Tm1	chr3R:11112196:11112286:+@chr3R:11113975:11115161:+	ri	0.13	0.11	0.16	0.34	0.3	0.37	-0.21	1000000000000	'chr3R:11112196:11112286:+@chr3R:11113975:11115161:+.A.withRI','chr3R:11112196:11112286:+@chr3R:11113975:11115161:+.B.up_chr3R:11112196:11112286:+@chr3R:11113975:11115161:+.B.dn'	(0,0):104,(0,1):3,(1,0):122,(1,1):598	0:184,1:539	(0,0):246,(0,1):4,(1,0):574,(1,1):1080	0:935,1:723	chr3R	+	1111219611112190	1111516111115160
111	Prosalpha5	chr2R:13300264:13300348:+@chr2R:13300410:13300548:+	ri	0.01	0.01	0.02	0.21	0.16	0.26	-0.2	1000000000000	'chr2R:13300264:13300348:+@chr2R:13300410:13300548:+.A.withRI','chr2R:13300264:13300348:+@chr2R:13300410:13300548:+.B.up_chr2R:13300264:13300348:+@chr2R:13300410:13300548:+.B.dn'	(0,0):238,(0,1):268,(1,0):10,(1,1):261	0:13,1:526	(0,0):54,(0,1):92,(1,0):72,(1,1):132	0:89,1:207	chr2R	+	1330026413300260	1330054813300540
112	Spase25	chrX:11379594:11380198:+@chrX:11380269:11380509:+	ri	0.75	0.69	0.81	0.95	0.91	0.97	-0.2	2.41034e+07	'chrX:11379594:11380198:+@chrX:11380269:11380509:+.A.withRI','chrX:11379594:11380198:+@chrX:11380269:11380509:+.B.up_chrX:11379594:11380198:+@chrX:11380269:11380509:+.B.dn'	(0,0):418,(0,1):22,(1,0):347,(1,1):3080	0:2722,1:727	(0,0):161,(0,1):7,(1,0):325,(1,1):1498	0:1738,1:92	chrX	+	1137959411379590	1138050911380500
113	CG8949	chrX:16971714:16971913:-@chrX:16970958:16971473:-	ri	0.17	0.1	0.26	0.37	0.3	0.44	-0.2	32.75	'chrX:16971714:16971913:-@chrX:16970958:16971473:-.A.withRI','chrX:16971714:16971913:-@chrX:16970958:16971473:-.B.dn_chrX:16971714:16971913:-@chrX:16970958:16971473:-.B.up'	(0,0):17,(0,1):35,(1,0):18,(1,1):106	0:37,1:122	(0,0):35,(0,1):55,(1,0):87,(1,1):239	0:207,1:174	chrX	-	1697095816970950	1697191316971910
114	CG32425	chr3L:20502804:20502892:+@chr3L:20503130:20503879:+	ri	0.06	0.04	0.08	0.26	0.22	0.31	-0.2	1000000000000	'chr3L:20502804:20502892:+@chr3L:20503130:20503879:+.A.withRI','chr3L:20502804:20502892:+@chr3L:20503130:20503879:+.B.up_chr3L:20502804:20502892:+@chr3L:20503130:20503879:+.B.dn'	(0,0):223,(1,0):35,(1,1):1593	0:139,1:1489	(0,0):297,(1,0):159,(1,1):1641	0:547,1:1253	chr3L	+	2050280420502800	2050387920503870
115	CG14777	chrX:1360523:1360966:+@chrX:1361836:1361997:+	ri	0.11	0.07	0.16	0.31	0.24	0.38	-0.2	24604.1	'chrX:1360523:1360966:+@chrX:1361836:1361997:+.A.withRI','chrX:1360523:1360966:+@chrX:1361836:1361997:+.B.up_chrX:1360523:1360966:+@chrX:1361836:1361997:+.B.dn'	(0,0):30,(0,1):47,(1,0):26,(1,1):38	0:28,1:83	(0,0):50,(0,1):37,(1,0):97,(1,1):73	0:116,1:91	chrX	+	13605231360523	13619971361997
116	CG7766	chrX:8995129:8995452:-@chrX:8992117:8992446:-	ri	0.09	0.07	0.12	0.29	0.25	0.33	-0.2	1000000000000	'chrX:8995129:8995452:-@chrX:8992117:8992446:-.A.withRI','chrX:8995129:8995452:-@chrX:8992117:8992446:-.B.dn_chrX:8995129:8995452:-@chrX:8992117:8992446:-.B.up'	(0,0):251,(0,1):2,(1,0):94,(1,1):170	0:105,1:161	(0,0):513,(0,1):11,(1,0):469,(1,1):258	0:537,1:201	chrX	-	89921178992117	89954528995452
117	TFAM, CG5412	chr3R:16402528:16402741:-@chr3R:16401868:16402446:-	ri	0.04	0.02	0.07	0.23	0.19	0.28	-0.19	1000000000000	'chr3R:16402528:16402741:-@chr3R:16401868:16402446:-.A.withRI','chr3R:16402528:16402741:-@chr3R:16401868:16402446:-.B.dn_chr3R:16402528:16402741:-@chr3R:16401868:16402446:-.B.up'	(0,0):91,(0,1):68,(1,0):7,(1,1):627	0:23,1:679	(0,0):78,(0,1):135,(1,0):92,(1,1):818	0:275,1:770	chr3R	-	1640186816401860	1640274116402740
118	Art3	chr3R:11054966:11055103:-@chr3R:11053327:11054901:-	ri	0.06	0.02	0.13	0.25	0.18	0.34	-0.19	42.47	'chr3R:11054966:11055103:-@chr3R:11053327:11054901:-.A.withRI','chr3R:11054966:11055103:-@chr3R:11053327:11054901:-.B.dn_chr3R:11054966:11055103:-@chr3R:11053327:11054901:-.B.up'	(0,0):15,(0,1):28,(1,0):4,(1,1):598	0:45,1:585	(0,0):16,(0,1):40,(1,0):25,(1,1):551	0:135,1:481	chr3R	-	1105332711053320	1105510311055100
119	Jafrac2	chr3L:3042352:3042450:+@chr3L:3043441:3043846:+	ri	0.19	0.17	0.23	0.38	0.32	0.46	-0.19	1301563407	'chr3L:3042352:3042450:+@chr3L:3043441:3043846:+.A.withRI','chr3L:3042352:3042450:+@chr3L:3043441:3043846:+.B.up_chr3L:3042352:3042450:+@chr3L:3043441:3043846:+.B.dn'	(0,0):756,(1,0):272,(1,1):435	0:365,1:342	(0,0):555,(0,1):1,(1,0):292,(1,1):233	0:372,1:154	chr3L	+	30423523042352	30438463043846
120	BuGZ	chr2L:16744690:16745107:+@chr2L:16746227:16746616:+	ri	0.5	0.42	0.59	0.69	0.62	0.77	-0.19	38.99	'chr2L:16744690:16745107:+@chr2L:16746227:16746616:+.A.withRI','chr2L:16744690:16745107:+@chr2L:16746227:16746616:+.B.up_chr2L:16744690:16745107:+@chr2L:16746227:16746616:+.B.dn'	(0,0):28,(0,1):18,(1,0):193,(1,1):156	0:260,1:107	(0,0):83,(0,1):19,(1,0):487,(1,1):288	0:677,1:117	chr2L	+	1674469016744690	1674661616746610
121	CG6950	chr3R:7647698:7647833:-@chr3R:7647002:7647541:-	ri	0.22	0.16	0.28	0.41	0.34	0.48	-0.19	39974.9	'chr3R:7647698:7647833:-@chr3R:7647002:7647541:-.A.withRI','chr3R:7647698:7647833:-@chr3R:7647002:7647541:-.B.dn_chr3R:7647698:7647833:-@chr3R:7647002:7647541:-.B.up'	(0,0):241,(0,1):6,(1,0):51,(1,1):679	0:215,1:521	(0,0):400,(0,1):7,(1,0):154,(1,1):1063	0:667,1:557	chr3R	-	76470027647002	76478337647833
122	CG17508	chr2R:1496109:1496340|1496287:+@chr2R:1496518:1496994:+	a5ss	0.26	0.22	0.3	0.45	0.41	0.5	-0.19	1000000000000	'chr2R:1496109:1496340|1496287:+@chr2R:1496518:1496994:+.A.coreAndExt_chr2R:1496109:1496340|1496287:+@chr2R:1496518:1496994:+.A.dn','chr2R:1496109:1496340|1496287:+@chr2R:1496518:1496994:+.B.core_chr2R:1496109:1496340|1496287:+@chr2R:1496518:1496994:+.B.dn'	(0,0):972,(0,1):18,(1,0):146,(1,1):3013	0:828,1:2349	(0,0):648,(0,1):27,(1,0):305,(1,1):2820	0:1541,1:1611	chr2R	+	14961091496109	14969941496994
123	TRAM	chrX:829364:829742|829417:+@chrX:830363:831786:+	a5ss	0.78	0.73	0.82	0.97	0.92	1	-0.19	1000000000000	'chrX:829364:829742|829417:+@chrX:830363:831786:+.A.coreAndExt_chrX:829364:829742|829417:+@chrX:830363:831786:+.A.dn','chrX:829364:829742|829417:+@chrX:830363:831786:+.B.core_chrX:829364:829742|829417:+@chrX:830363:831786:+.B.dn'	(0,0):524,(1,0):1590,(1,1):8075	0:7906,1:1759	(0,0):249,(1,0):1221,(1,1):4868	0:6029,1:60	chrX	+	829364829364	831786831786
124	CG7766	chrX:8994546:8994690:-@chrX:8992117:8992446:-	ri	0.08	0.06	0.11	0.27	0.23	0.32	-0.19	1000000000000	'chrX:8994546:8994690:-@chrX:8992117:8992446:-.A.withRI','chrX:8994546:8994690:-@chrX:8992117:8992446:-.B.dn_chrX:8994546:8994690:-@chrX:8992117:8992446:-.B.up'	(0,0):140,(0,1):14,(1,0):70,(1,1):103	0:76,1:111	(0,0):318,(0,1):14,(1,0):398,(1,1):172	0:444,1:140	chrX	-	89921178992117	89946908994690
125	CG5819	chr2R:18180950:18181256:+@chr2R:18181430:18182699:+	ri	0.12	0.08	0.17	0.3	0.24	0.37	-0.18	943579	'chr2R:18180950:18181256:+@chr2R:18181430:18182699:+.A.withRI','chr2R:18180950:18181256:+@chr2R:18181430:18182699:+.B.up_chr2R:18180950:18181256:+@chr2R:18181430:18182699:+.B.dn'	(0,0):65,(0,1):71,(1,0):24,(1,1):841	0:166,1:770	(0,0):59,(0,1):83,(1,0):81,(1,1):887	0:362,1:689	chr2R	+	1818095018180950	1818269918182690
126	Vps25	chr2R:4512956:4513080:+@chr2R:4513133:4513793:+	ri	0.06	0.03	0.08	0.24	0.19	0.29	-0.18	1000000000000	'chr2R:4512956:4513080:+@chr2R:4513133:4513793:+.A.withRI','chr2R:4512956:4513080:+@chr2R:4513133:4513793:+.B.up_chr2R:4512956:4513080:+@chr2R:4513133:4513793:+.B.dn'	(0,0):13,(0,1):153,(1,0):15,(1,1):677	0:44,1:801	(0,0):14,(0,1):129,(1,0):75,(1,1):512	0:186,1:530	chr2R	+	45129564512956	45137934513793
127	Hmt-1	chr3R:11683052:11683218:-@chr3R:11682360:11682675:-	ri	0.05	0.03	0.07	0.23	0.19	0.28	-0.18	1000000000000	'chr3R:11683052:11683218:-@chr3R:11682360:11682675:-.A.withRI','chr3R:11683052:11683218:-@chr3R:11682360:11682675:-.B.dn_chr3R:11683052:11683218:-@chr3R:11682360:11682675:-.B.up'	(0,0):53,(0,1):98,(1,0):15,(1,1):85	0:18,1:180	(0,0):57,(0,1):118,(1,0):120,(1,1):126	0:149,1:215	chr3R	-	1168236011682360	1168321811683210
128	CG18659	chr2R:5014532:5014667:-@chr2R:5013056:5013571:-	ri	0.12	0.08	0.17	0.3	0.22	0.39	-0.18	1108.74	'chr2R:5014532:5014667:-@chr2R:5013056:5013571:-.A.withRI','chr2R:5014532:5014667:-@chr2R:5013056:5013571:-.B.dn_chr2R:5014532:5014667:-@chr2R:5013056:5013571:-.B.up'	(0,0):46,(1,0):29,(1,1):117	0:40,1:106	(0,0):50,(0,1):8,(1,0):76,(1,1):103	0:100,1:87	chr2R	-	50130565013056	50146675014667
129	CG13319	chr2R:8811372:8811852:+@chr2R:8811927:8812157:+	ri	0.05	0.03	0.09	0.23	0.18	0.29	-0.18	1000000000000	'chr2R:8811372:8811852:+@chr2R:8811927:8812157:+.A.withRI','chr2R:8811372:8811852:+@chr2R:8811927:8812157:+.B.up_chr2R:8811372:8811852:+@chr2R:8811927:8812157:+.B.dn'	(0,0):23,(0,1):81,(1,0):8,(1,1):396	0:35,1:450	(0,0):29,(0,1):68,(1,0):51,(1,1):439	0:149,1:409	chr2R	+	88113728811372	88121578812157
130	mesh	chr3R:27006301:27006540:-@chr3R:27006181:27006231:-	ri	0.57	0.48	0.66	0.75	0.71	0.79	-0.18	266.17	'chr3R:27006301:27006540:-@chr3R:27006181:27006231:-.A.withRI','chr3R:27006301:27006540:-@chr3R:27006181:27006231:-.B.dn_chr3R:27006301:27006540:-@chr3R:27006181:27006231:-.B.up'	(0,0):122,(0,1):33,(1,0):108,(1,1):95	0:166,1:70	(0,0):237,(0,1):104,(1,0):597,(1,1):155	0:719,1:137	chr3R	-	2700618127006180	2700654027006540
131	CG32425	chr3L:20502804:20502875:+@chr3L:20503130:20503879:+	ri	0.06	0.04	0.07	0.24	0.2	0.28	-0.18	1000000000000	'chr3L:20502804:20502875:+@chr3L:20503130:20503879:+.A.withRI','chr3L:20502804:20502875:+@chr3L:20503130:20503879:+.B.up_chr3L:20502804:20502875:+@chr3L:20503130:20503879:+.B.dn'	(0,0):223,(1,0):35,(1,1):1593	0:112,1:1516	(0,0):297,(1,0):159,(1,1):1641	0:552,1:1248	chr3L	+	2050280420502800	2050387920503870
132	Herp	chr2L:7799833:7799846:-@chr2L:7798163:7798623:-	ri	0.18	0.16	0.21	0.36	0.32	0.39	-0.18	1000000000000	'chr2L:7799833:7799846:-@chr2L:7798163:7798623:-.A.withRI','chr2L:7799833:7799846:-@chr2L:7798163:7798623:-.B.dn_chr2L:7799833:7799846:-@chr2L:7798163:7798623:-.B.up'	(0,0):470,(1,0):528,(1,1):660	0:641,1:547	(0,0):892,(1,0):1012,(1,1):644	0:1231,1:425	chr2L	-	77981637798163	77998467799846
133	pyd	chr3R:4664114:4664711:-@chr3R:4660079:4660671:-	ri	0.15	0.12	0.18	0.33	0.28	0.38	-0.18	1000000000000	'chr3R:4664114:4664711:-@chr3R:4660079:4660671:-.A.withRI','chr3R:4664114:4664711:-@chr3R:4660079:4660671:-.B.dn_chr3R:4664114:4664711:-@chr3R:4660079:4660671:-.B.up'	(0,0):117,(0,1):2,(1,0):112,(1,1):217	0:148,1:183	(0,0):239,(0,1):12,(1,0):348,(1,1):286	0:438,1:208	chr3R	-	46600794660079	46647114664711
134	CG6950	chr3R:7647629:7647833:-@chr3R:7647002:7647541:-	ri	0.05	0.02	0.08	0.22	0.18	0.27	-0.17	1000000000000	'chr3R:7647629:7647833:-@chr3R:7647002:7647541:-.A.withRI','chr3R:7647629:7647833:-@chr3R:7647002:7647541:-.B.dn_chr3R:7647629:7647833:-@chr3R:7647002:7647541:-.B.up'	(0,0):202,(0,1):45,(1,0):9,(1,1):721	0:38,1:737	(0,0):336,(0,1):71,(1,0):72,(1,1):1145	0:330,1:958	chr3R	-	76470027647002	76478337647833
135	AkhR	chr2L:6712338:6712675:-@chr2L:6711341:6711742:-	ri	0.08	0.05	0.1	0.25	0.2	0.32	-0.17	1000000000000	'chr2L:6712338:6712675:-@chr2L:6711341:6711742:-.A.withRI','chr2L:6712338:6712675:-@chr2L:6711341:6711742:-.B.dn_chr2L:6712338:6712675:-@chr2L:6711341:6711742:-.B.up'	(0,0):80,(0,1):111,(1,0):40,(1,1):267	0:60,1:358	(0,0):28,(0,1):54,(1,0):76,(1,1):136	0:110,1:156	chr2L	-	67113416711341	67126756712675
136	ATPsynE	chr3R:10152746:10152910:+@chr3R:10152975:10153473:+	ri	0	0	0.01	0.17	0.15	0.19	-0.17	1000000000000	'chr3R:10152746:10152910:+@chr3R:10152975:10153473:+.A.withRI','chr3R:10152746:10152910:+@chr3R:10152975:10153473:+.B.up_chr3R:10152746:10152910:+@chr3R:10152975:10153473:+.B.dn'	(0,0):1465,(0,1):21,(1,0):2,(1,1):5680	0:16,1:5687	(0,0):2614,(0,1):54,(1,0):253,(1,1):9319	0:1846,1:7780	chr3R	+	1015274610152740	1015347310153470
137	par-1	chr2R:15347300:15348121:+@chr2R:15358102:15358317:+	ri	0.3	0.27	0.33	0.47	0.44	0.51	-0.17	1000000000000	'chr2R:15347300:15348121:+@chr2R:15358102:15358317:+.A.withRI','chr2R:15347300:15348121:+@chr2R:15358102:15358317:+.B.up_chr2R:15347300:15348121:+@chr2R:15358102:15358317:+.B.dn'	(0,0):320,(0,1):54,(1,0):1299,(1,1):285	0:1378,1:260	(0,0):614,(0,1):63,(1,0):3162,(1,1):432	0:3379,1:278	chr2R	+	1534730015347300	1535831715358310
138	hts	chr2R:15311549:15311585:-@chr2R:15311099:15311302:-	ri	0.06	0.04	0.09	0.23	0.17	0.29	-0.17	2.64531e+11	'chr2R:15311549:15311585:-@chr2R:15311099:15311302:-.A.withRI','chr2R:15311549:15311585:-@chr2R:15311099:15311302:-.B.dn_chr2R:15311549:15311585:-@chr2R:15311099:15311302:-.B.up'	(0,0):97,(0,1):25,(1,0):22,(1,1):76	0:28,1:95	(0,0):262,(0,1):27,(1,0):88,(1,1):64	0:108,1:71	chr2R	-	1531109915311090	1531158515311580
139	Rab10, CG17068	chrX:20122414:20122831:+@chrX:20123582:20123671:+	ri	0.23	0.19	0.27	0.4	0.35	0.45	-0.17	1.35456e+11	'chrX:20122414:20122831:+@chrX:20123582:20123671:+.A.withRI','chrX:20122414:20122831:+@chrX:20123582:20123671:+.B.up_chrX:20122414:20122831:+@chrX:20123582:20123671:+.B.dn'	(0,0):463,(0,1):3,(1,0):210,(1,1):383	0:295,1:301	(0,0):549,(0,1):7,(1,0):468,(1,1):467	0:639,1:303	chrX	+	2012241420122410	2012367120123670
140	lap	chr3R:3019315:3019410:+@chr3R:3019920:3020180:+@chr3R:3024050:3024417:+	se	0.15	0.1	0.22	0.32	0.24	0.41	-0.17	25.21	'chr3R:3019315:3019410:+@chr3R:3019920:3020180:+@chr3R:3024050:3024417:+.A.up_chr3R:3019315:3019410:+@chr3R:3019920:3020180:+@chr3R:3024050:3024417:+.A.se_chr3R:3019315:3019410:+@chr3R:3019920:3020180:+@chr3R:3024050:3024417:+.A.dn','chr3R:3019315:3019410:+@chr3R:3019920:3020180:+@chr3R:3024050:3024417:+.B.up_chr3R:3019315:3019410:+@chr3R:3019920:3020180:+@chr3R:3024050:3024417:+.B.dn'	(0,0):472,(1,0):26,(1,1):185	0:47,1:164	(0,0):889,(0,1):1,(1,0):84,(1,1):267	0:170,1:182	chr3R	+	30193153019315	30244173024417
141	Vha55	chr3R:8453362:8453491:-@chr3R:8453171:8453297:-	ri	0.04	0.03	0.05	0.2	0.19	0.22	-0.16	1000000000000	'chr3R:8453362:8453491:-@chr3R:8453171:8453297:-.A.withRI','chr3R:8453362:8453491:-@chr3R:8453171:8453297:-.B.dn_chr3R:8453362:8453491:-@chr3R:8453171:8453297:-.B.up'	(0,0):250,(0,1):519,(1,0):83,(1,1):1016	0:107,1:1511	(0,0):254,(0,1):1042,(1,0):1144,(1,1):3254	0:1611,1:3829	chr3R	-	84531718453171	84534918453491
142	sick	chr2L:19935524:19935527:+@chr2L:19945270:19946702:+	ri	0.12	0.09	0.15	0.28	0.25	0.32	-0.16	1000000000000	'chr2L:19935524:19935527:+@chr2L:19945270:19946702:+.A.withRI','chr2L:19935524:19935527:+@chr2L:19945270:19946702:+.B.up_chr2L:19935524:19935527:+@chr2L:19945270:19946702:+.B.dn'	(0,0):10,(1,0):95,(1,1):107	0:107,1:95	(0,0):34,(0,1):1,(1,0):661,(1,1):297	0:737,1:222	chr2L	+	1993552419935520	1994670219946700
143	REG	chrX:13106389:13106425:+@chrX:13106497:13106991:+	ri	0.07	0.05	0.09	0.23	0.2	0.26	-0.16	1000000000000	'chrX:13106389:13106425:+@chrX:13106497:13106991:+.A.withRI','chrX:13106389:13106425:+@chrX:13106497:13106991:+.B.up_chrX:13106389:13106425:+@chrX:13106497:13106991:+.B.dn'	(0,0):143,(0,1):231,(1,0):37,(1,1):1225	0:107,1:1386	(0,0):213,(0,1):341,(1,0):213,(1,1):1859	0:648,1:1765	chrX	+	1310638913106380	1310699113106990
144	Cnx99A	chr3R:25145174:25145215:-@chr3R:25143996:25144334:-	ri	0.18	0.16	0.22	0.34	0.29	0.4	-0.16	1.77766e+08	'chr3R:25145174:25145215:-@chr3R:25143996:25144334:-.A.withRI','chr3R:25145174:25145215:-@chr3R:25143996:25144334:-.B.dn_chr3R:25145174:25145215:-@chr3R:25143996:25144334:-.B.up'	(0,0):691,(1,0):298,(1,1):358	0:353,1:303	(0,0):698,(1,0):347,(1,1):222	0:414,1:155	chr3R	-	2514399625143990	2514521525145210
145	RhoL	chr3R:5328097:5328387:-@chr3R:5323602:5323886:-	ri	0.01	0.01	0.01	0.17	0.16	0.18	-0.16	1000000000000	'chr3R:5328097:5328387:-@chr3R:5323602:5323886:-.A.withRI','chr3R:5328097:5328387:-@chr3R:5323602:5323886:-.B.dn_chr3R:5328097:5328387:-@chr3R:5323602:5323886:-.B.up'	(0,0):126,(0,1):306,(1,0):98,(1,1):522	0:102,1:824	(0,0):268,(0,1):372,(1,0):2126,(1,1):623	0:2232,1:889	chr3R	-	53236025323602	53283875328387
146	CG13364	chrX:519199:519335:-@chrX:518735:519138:-	ri	0.12	0.1	0.14	0.27	0.25	0.3	-0.15	1000000000000	'chrX:519199:519335:-@chrX:518735:519138:-.A.withRI','chrX:519199:519335:-@chrX:518735:519138:-.B.dn_chrX:519199:519335:-@chrX:518735:519138:-.B.up'	(0,0):4,(0,1):445,(1,0):107,(1,1):1802	0:326,1:2028	(0,0):13,(0,1):546,(1,0):333,(1,1):1918	0:840,1:1957	chrX	-	518735518735	519335519335
147	pAbp	chr2R:14028820:14028921:+@chr2R:14028993:14029177:+	ri	0	0	0.01	0.15	0.13	0.16	-0.15	1000000000000	'chr2R:14028820:14028921:+@chr2R:14028993:14029177:+.A.withRI','chr2R:14028820:14028921:+@chr2R:14028993:14029177:+.B.up_chr2R:14028820:14028921:+@chr2R:14028993:14029177:+.B.dn'	(0,0):1611,(0,1):261,(1,0):2,(1,1):933	0:8,1:1188	(0,0):1920,(0,1):336,(1,0):219,(1,1):1150	0:360,1:1345	chr2R	+	1402882014028820	1402917714029170
148	CG11791	chr3R:20875917:20876339:+@chr3R:20876903:20877278:+	ri	0.36	0.32	0.4	0.51	0.48	0.54	-0.15	1000000000000	'chr3R:20875917:20876339:+@chr3R:20876903:20877278:+.A.withRI','chr3R:20875917:20876339:+@chr3R:20876903:20877278:+.B.up_chr3R:20875917:20876339:+@chr3R:20876903:20877278:+.B.dn'	(0,0):153,(0,1):117,(1,0):325,(1,1):590	0:536,1:496	(0,0):152,(0,1):216,(1,0):855,(1,1):868	0:1286,1:653	chr3R	+	2087591720875910	2087727820877270
149	CycG	chr3R:27436603:27436706:-@chr3R:27427945|27428795:27427138:-	a3ss	0.06	0.06	0.07	0.21	0.2	0.22	-0.15	1000000000000	'chr3R:27436603:27436706:-@chr3R:27427945|27428795:27427138:-.A.coreAndExt_chr3R:27436603:27436706:-@chr3R:27427945|27428795:27427138:-.A.up','chr3R:27436603:27436706:-@chr3R:27427945|27428795:27427138:-.B.core_chr3R:27436603:27436706:-@chr3R:27427945|27428795:27427138:-.B.up'	(0,0):2980,(0,1):182,(1,0):308,(1,1):3659	0:522,1:3627	(0,0):9520,(0,1):384,(1,0):1681,(1,1):5927	0:2828,1:5164	chr3R	-	2742713827427130	2743670627436700
150	Rap1	chr3L:1862304:1862178|1861930:-@chr3L:1859105:1861676:-	a5ss	0.2	0.16	0.26	0.35	0.3	0.4	-0.15	266.89	'chr3L:1862304:1862178|1861930:-@chr3L:1859105:1861676:-.A.dn_chr3L:1862304:1862178|1861930:-@chr3L:1859105:1861676:-.A.coreAndExt','chr3L:1862304:1862178|1861930:-@chr3L:1859105:1861676:-.B.dn_chr3L:1862304:1862178|1861930:-@chr3L:1859105:1861676:-.B.core'	(0,0):270,(0,1):1,(1,0):73,(1,1):3649	0:713,1:3010	(0,0):1118,(0,1):1,(1,0):177,(1,1):5142	0:1912,1:3408	chr3L	-	18591051859105	18623041862304
151	CG1518	chrX:20923437:20923826:-@chrX:20922153:20922632:-	ri	0.23	0.2	0.27	0.38	0.32	0.46	-0.15	37.71	'chrX:20923437:20923826:-@chrX:20922153:20922632:-.A.withRI','chrX:20923437:20923826:-@chrX:20922153:20922632:-.B.dn_chrX:20923437:20923826:-@chrX:20922153:20922632:-.B.up'	(0,0):537,(0,1):1,(1,0):180,(1,1):647	0:347,1:481	(0,0):351,(0,1):1,(1,0):183,(1,1):401	0:353,1:232	chrX	-	2092215320922150	2092382620923820
152	CG4390	chr3R:15883164:15883282:-@chr3R:15882135:15883096:-	ri	0.04	0.02	0.06	0.19	0.16	0.23	-0.15	1000000000000	'chr3R:15883164:15883282:-@chr3R:15882135:15883096:-.A.withRI','chr3R:15883164:15883282:-@chr3R:15882135:15883096:-.B.dn_chr3R:15883164:15883282:-@chr3R:15882135:15883096:-.B.up'	(0,0):107,(0,1):266,(1,0):22,(1,1):4020	0:193,1:4115	(0,0):89,(0,1):249,(1,0):119,(1,1):3754	0:797,1:3325	chr3R	-	1588213515882130	1588328215883280
153	pyd	chr3R:4664114:4664711:-@chr3R:4660999:4661232:-	ri	0.11	0.09	0.15	0.26	0.22	0.3	-0.15	1000000000000	'chr3R:4664114:4664711:-@chr3R:4660999:4661232:-.A.withRI','chr3R:4664114:4664711:-@chr3R:4660999:4661232:-.B.dn_chr3R:4664114:4664711:-@chr3R:4660999:4661232:-.B.up'	(0,0):30,(0,1):30,(1,0):88,(1,1):134	0:98,1:154	(0,0):93,(0,1):63,(1,0):319,(1,1):166	0:359,1:189	chr3R	-	46609994660999	46647114664711
154	mthl3	chr2R:13339958:13340078:-@chr2R:13338034:13338537:-	ri	0.06	0.05	0.08	0.21	0.19	0.23	-0.15	1000000000000	'chr2R:13339958:13340078:-@chr2R:13338034:13338537:-.A.withRI','chr2R:13339958:13340078:-@chr2R:13338034:13338537:-.B.dn_chr2R:13339958:13340078:-@chr2R:13338034:13338537:-.B.up'	(0,0):96,(0,1):57,(1,0):79,(1,1):310	0:107,1:339	(0,0):248,(0,1):96,(1,0):625,(1,1):751	0:792,1:680	chr2R	-	1333803413338030	1334007813340070
155	CG7766	chrX:8993347:8993494:-@chrX:8992117:8992446:-	ri	0.06	0.04	0.08	0.21	0.18	0.24	-0.15	1000000000000	'chrX:8993347:8993494:-@chrX:8992117:8992446:-.A.withRI','chrX:8993347:8993494:-@chrX:8992117:8992446:-.B.dn_chrX:8993347:8993494:-@chrX:8992117:8992446:-.B.up'	(0,0):60,(0,1):79,(1,0):41,(1,1):111	0:49,1:182	(0,0):192,(0,1):118,(1,0):250,(1,1):177	0:294,1:251	chrX	-	89921178992117	89934948993494
156	Spn42Da	chr2R:2766350:2766428:-@chr2R:2764932:2765863:-	ri	0.06	0.05	0.08	0.21	0.19	0.24	-0.15	1000000000000	'chr2R:2766350:2766428:-@chr2R:2764932:2765863:-.A.withRI','chr2R:2766350:2766428:-@chr2R:2764932:2765863:-.B.dn_chr2R:2766350:2766428:-@chr2R:2764932:2765863:-.B.up'	(0,0):341,(0,1):107,(1,0):93,(1,1):2175	0:219,1:2156	(0,0):299,(0,1):108,(1,0):349,(1,1):2343	0:835,1:1965	chr2R	-	27649322764932	27664282766428
157	CkIIbeta	chrX:11689138:11689219:+@chrX:11690637:11691278:+	ri	0.46	0.41	0.53	0.6	0.55	0.66	-0.14	10.33	'chrX:11689138:11689219:+@chrX:11690637:11691278:+.A.withRI','chrX:11689138:11689219:+@chrX:11690637:11691278:+.B.up_chrX:11689138:11689219:+@chrX:11690637:11691278:+.B.dn'	(0,0):388,(0,1):4,(1,0):578,(1,1):456	0:778,1:260	(0,0):566,(0,1):3,(1,0):1000,(1,1):603	0:1353,1:253	chrX	+	1168913811689130	1169127811691270
158	CG12034	chr3L:3219092:3219344:+@chr3L:3219431:3220938:+	ri	0.03	0.01	0.05	0.17	0.12	0.24	-0.14	8.63174e+11	'chr3L:3219092:3219344:+@chr3L:3219431:3220938:+.A.withRI','chr3L:3219092:3219344:+@chr3L:3219431:3220938:+.B.up_chr3L:3219092:3219344:+@chr3L:3219431:3220938:+.B.dn'	(0,0):23,(0,1):102,(1,0):6,(1,1):1595	0:28,1:1675	(0,0):19,(0,1):57,(1,0):26,(1,1):1078	0:190,1:971	chr3L	+	32190923219092	32209383220938
159	UbcE2M	chr3L:8190879:8190964:-@chr3L:8190622:8190802:-	ri	0.03	0.01	0.05	0.17	0.14	0.2	-0.14	1000000000000	'chr3L:8190879:8190964:-@chr3L:8190622:8190802:-.A.withRI','chr3L:8190879:8190964:-@chr3L:8190622:8190802:-.B.dn_chr3L:8190879:8190964:-@chr3L:8190622:8190802:-.B.up'	(0,0):123,(0,1):101,(1,0):10,(1,1):237	0:16,1:332	(0,0):234,(0,1):194,(1,0):118,(1,1):261	0:152,1:421	chr3L	-	81906228190622	81909648190964
160	crc	chr2L:21311914:21312043:+@chr2L:21312098:21312208:+	ri	0.01	0.01	0.02	0.15	0.14	0.17	-0.14	1000000000000	'chr2L:21311914:21312043:+@chr2L:21312098:21312208:+.A.withRI','chr2L:21311914:21312043:+@chr2L:21312098:21312208:+.B.up_chr2L:21311914:21312043:+@chr2L:21312098:21312208:+.B.dn'	(0,0):1592,(0,1):794,(1,0):30,(1,1):851	0:40,1:1635	(0,0):779,(0,1):599,(1,0):291,(1,1):629	0:348,1:1171	chr2L	+	2131191421311910	2131220821312200
161	PGRP-LC	chr3L:9333554:9333601:+@chr3L:9335265:9336229:+	ri	0.04	0.03	0.06	0.18	0.15	0.21	-0.14	1000000000000	'chr3L:9333554:9333601:+@chr3L:9335265:9336229:+.A.withRI','chr3L:9333554:9333601:+@chr3L:9335265:9336229:+.B.up_chr3L:9333554:9333601:+@chr3L:9335265:9336229:+.B.dn'	(0,0):51,(0,1):1,(1,0):22,(1,1):272	0:35,1:260	(0,0):102,(0,1):4,(1,0):210,(1,1):562	0:295,1:481	chr3L	+	93335549333554	93362299336229
162	ATPsynE	chr3R:10152746:10152905:+@chr3R:10152975:10153473:+	ri	0	0	0.01	0.14	0.12	0.16	-0.14	1000000000000	'chr3R:10152746:10152905:+@chr3R:10152975:10153473:+.A.withRI','chr3R:10152746:10152905:+@chr3R:10152975:10153473:+.B.up_chr3R:10152746:10152905:+@chr3R:10152975:10153473:+.B.dn'	(0,0):1385,(0,1):101,(1,0):2,(1,1):5680	0:12,1:5771	(0,0):2451,(0,1):217,(1,0):253,(1,1):9319	0:1471,1:8318	chr3R	+	1015274610152740	1015347310153470
163	ATPsynD	chr3R:14920714:14920796|14920743:+@chr3R:14921119:14921792:+	a5ss	0.43	0.39	0.47	0.57	0.54	0.6	-0.14	1000000000000	'chr3R:14920714:14920796|14920743:+@chr3R:14921119:14921792:+.A.coreAndExt_chr3R:14920714:14920796|14920743:+@chr3R:14921119:14921792:+.A.dn','chr3R:14920714:14920796|14920743:+@chr3R:14921119:14921792:+.B.core_chr3R:14920714:14920796|14920743:+@chr3R:14921119:14921792:+.B.dn'	(0,0):168,(0,1):86,(1,0):460,(1,1):8725	0:4349,1:4922	(0,0):419,(0,1):179,(1,0):1366,(1,1):18464	0:11907,1:8102	chr3R	+	1492071414920710	1492179214921790
164	Rip11	chrX:18531446:18531606:-@chrX:18529675:18530352:-	ri	0.19	0.16	0.23	0.33	0.3	0.37	-0.14	5.29212e+09	'chrX:18531446:18531606:-@chrX:18529675:18530352:-.A.withRI','chrX:18531446:18531606:-@chrX:18529675:18530352:-.B.dn_chrX:18531446:18531606:-@chrX:18529675:18530352:-.B.up'	(0,0):342,(0,1):39,(1,0):192,(1,1):511	0:290,1:452	(0,0):430,(0,1):37,(1,0):471,(1,1):750	0:747,1:511	chrX	-	1852967518529670	1853160618531600
165	TER94	chr2R:5879542:5880201:+@chr2R:5880271:5880422:+	ri	0.1	0.08	0.13	0.24	0.2	0.28	-0.14	6.07394e+07	'chr2R:5879542:5880201:+@chr2R:5880271:5880422:+.A.withRI','chr2R:5879542:5880201:+@chr2R:5880271:5880422:+.B.up_chr2R:5879542:5880201:+@chr2R:5880271:5880422:+.B.dn'	(0,0):808,(0,1):27,(1,0):53,(1,1):2537	0:267,1:2350	(0,0):590,(0,1):23,(1,0):118,(1,1):1909	0:536,1:1514	chr2R	+	58795425879542	58804225880422
166	CG30497	chr2R:3669232:3670182:-@chr2R:3665980:3667390:-@chr2R:3625267:3629425:-	se	0.63	0.58	0.69	0.77	0.72	0.81	-0.14	65.29	'chr2R:3669232:3670182:-@chr2R:3665980:3667390:-@chr2R:3625267:3629425:-.A.dn_chr2R:3669232:3670182:-@chr2R:3665980:3667390:-@chr2R:3625267:3629425:-.A.se_chr2R:3669232:3670182:-@chr2R:3665980:3667390:-@chr2R:3625267:3629425:-.A.up','chr2R:3669232:3670182:-@chr2R:3665980:3667390:-@chr2R:3625267:3629425:-.B.dn_chr2R:3669232:3670182:-@chr2R:3665980:3667390:-@chr2R:3625267:3629425:-.B.up'	(0,0):527,(1,0):667,(1,1):3675	0:3086,1:1256	(0,0):1071,(1,0):1457,(1,1):6610	0:6810,1:1257	chr2R	-	36252673625267	36701823670182
167	Rab9	chr2L:19432586:19433063:+@chr2L:19434667:19434861:+	ri	0.04	0.02	0.05	0.18	0.15	0.21	-0.14	1000000000000	'chr2L:19432586:19433063:+@chr2L:19434667:19434861:+.A.withRI','chr2L:19432586:19433063:+@chr2L:19434667:19434861:+.B.up_chr2L:19432586:19433063:+@chr2L:19434667:19434861:+.B.dn'	(0,0):45,(0,1):60,(1,0):27,(1,1):147	0:31,1:203	(0,0):62,(0,1):51,(1,0):200,(1,1):254	0:247,1:258	chr2L	+	1943258619432580	1943486119434860
168	SclA, SclB	chr2L:16840165:16840208:+@chr2L:16840274:16840578:+	ri	0.2	0.15	0.25	0.33	0.3	0.37	-0.13	816.1	'chr2L:16840165:16840208:+@chr2L:16840274:16840578:+.A.withRI','chr2L:16840165:16840208:+@chr2L:16840274:16840578:+.B.up_chr2L:16840165:16840208:+@chr2L:16840274:16840578:+.B.dn'	(0,0):1004,(1,0):54,(1,1):655	0:187,1:522	(0,0):3763,(1,0):438,(1,1):3010	0:1421,1:2027	chr2L	+	1684016516840160	1684057816840570
169	PGRP-LC	chr3L:9333554:9333689:+@chr3L:9335265:9336229:+	ri	0.04	0.02	0.06	0.17	0.15	0.2	-0.13	1000000000000	'chr3L:9333554:9333689:+@chr3L:9335265:9336229:+.A.withRI','chr3L:9333554:9333689:+@chr3L:9335265:9336229:+.B.up_chr3L:9333554:9333689:+@chr3L:9335265:9336229:+.B.dn'	(0,0):13,(0,1):39,(1,0):21,(1,1):273	0:32,1:301	(0,0):38,(0,1):68,(1,0):206,(1,1):566	0:299,1:541	chr3L	+	93335549333554	93362299336229
170	CG13124	chr2L:9907608:9907783:-@chr2L:9907051:9907544:-	ri	0.04	0.01	0.08	0.17	0.12	0.22	-0.13	798157	'chr2L:9907608:9907783:-@chr2L:9907051:9907544:-.A.withRI','chr2L:9907608:9907783:-@chr2L:9907051:9907544:-.B.dn_chr2L:9907608:9907783:-@chr2L:9907051:9907544:-.B.up'	(0,0):128,(0,1):50,(1,0):3,(1,1):237	0:20,1:270	(0,0):539,(0,1):101,(1,0):45,(1,1):691	0:172,1:665	chr2L	-	99070519907051	99077839907783
171	CycG	chr3R:27435042:27435796:-@chr3R:27427138:27427952:-	ri	0.05	0.05	0.06	0.18	0.17	0.19	-0.13	1000000000000	'chr3R:27435042:27435796:-@chr3R:27427138:27427952:-.A.withRI','chr3R:27435042:27435796:-@chr3R:27427138:27427952:-.B.dn_chr3R:27435042:27435796:-@chr3R:27427138:27427952:-.B.up'	(0,0):813,(0,1):287,(1,0):1327,(1,1):4376	0:1574,1:4416	(0,0):1400,(0,1):365,(1,0):7404,(1,1):7394	0:8739,1:6424	chr3R	-	2742713827427130	2743579627435790
172	CG11073	chr2R:17986487:17987019:-@chr2R:17982029:17982292:-	ri	0.05	0.03	0.08	0.18	0.15	0.21	-0.13	1000000000000	'chr2R:17986487:17987019:-@chr2R:17982029:17982292:-.A.withRI','chr2R:17986487:17987019:-@chr2R:17982029:17982292:-.B.dn_chr2R:17986487:17987019:-@chr2R:17982029:17982292:-.B.up'	(0,0):9,(0,1):14,(1,0):21,(1,1):48	0:24,1:59	(0,0):37,(0,1):28,(1,0):295,(1,1):194	0:327,1:190	chr2R	-	1798202917982020	1798701917987010
173	AkhR	chr2L:6716026:6716183:-@chr2L:6714555:6714767:-	ri	0.04	0.03	0.06	0.17	0.13	0.23	-0.13	3.52482e+09	'chr2L:6716026:6716183:-@chr2L:6714555:6714767:-.A.withRI','chr2L:6716026:6716183:-@chr2L:6714555:6714767:-.B.dn_chr2L:6716026:6716183:-@chr2L:6714555:6714767:-.B.up'	(0,0):37,(0,1):62,(1,0):33,(1,1):44	0:37,1:102	(0,0):16,(0,1):23,(1,0):89,(1,1):42	0:101,1:53	chr2L	-	67145556714555	67161836716183
174	Cg25C	chr2L:5029620:5029810:+@chr2L:5030137:5030237:+	ri	0.02	0.01	0.05	0.15	0.13	0.17	-0.13	1000000000000	'chr2L:5029620:5029810:+@chr2L:5030137:5030237:+.A.withRI','chr2L:5029620:5029810:+@chr2L:5030137:5030237:+.B.up_chr2L:5029620:5029810:+@chr2L:5030137:5030237:+.B.dn'	(0,0):171,(0,1):41,(1,0):4,(1,1):11	0:4,1:52	(0,0):991,(0,1):316,(1,0):277,(1,1):70	0:291,1:372	chr2L	+	50296205029620	50302375030237
175	Rm62	chr3R:1834278:1834282:-@chr3R:1833759:1834028:-	ri	0.03	0.02	0.03	0.15	0.14	0.17	-0.12	1000000000000	'chr3R:1834278:1834282:-@chr3R:1833759:1834028:-.A.withRI','chr3R:1834278:1834282:-@chr3R:1833759:1834028:-.B.dn_chr3R:1834278:1834282:-@chr3R:1833759:1834028:-.B.up'	(0,0):505,(1,0):60,(1,1):857	0:94,1:823	(0,0):1328,(1,0):800,(1,1):1848	0:1083,1:1565	chr3R	-	18337591833759	18342821834282
176	Rm62	chr3R:1834273:1834276:-@chr3R:1833759:1834031:-	ri	0.03	0.02	0.03	0.15	0.13	0.16	-0.12	1000000000000	'chr3R:1834273:1834276:-@chr3R:1833759:1834031:-.A.withRI','chr3R:1834273:1834276:-@chr3R:1833759:1834031:-.B.dn_chr3R:1834273:1834276:-@chr3R:1833759:1834031:-.B.up'	(0,0):499,(0,1):6,(1,0):59,(1,1):858	0:73,1:850	(0,0):1385,(0,1):10,(1,0):731,(1,1):1850	0:1025,1:1566	chr3R	-	18337591833759	18342761834276
177	EloC	chr2R:15333723:15333794:-@chr2R:15333433:15333644:-	ri	0.22	0.18	0.27	0.34	0.28	0.41	-0.12	10.33	'chr2R:15333723:15333794:-@chr2R:15333433:15333644:-.A.withRI','chr2R:15333723:15333794:-@chr2R:15333433:15333644:-.B.dn_chr2R:15333723:15333794:-@chr2R:15333433:15333644:-.B.up'	(0,0):129,(0,1):105,(1,0):95,(1,1):254	0:168,1:286	(0,0):49,(0,1):61,(1,0):104,(1,1):180	0:160,1:185	chr2R	-	1533343315333430	1533379415333790
178	par-1	chr2R:15347300:15348121:+@chr2R:15356295:15357843:+@chr2R:15358102:15358317:+	se	0.75	0.7	0.79	0.87	0.85	0.9	-0.12	1.63185e+07	'chr2R:15347300:15348121:+@chr2R:15356295:15357843:+@chr2R:15358102:15358317:+.A.up_chr2R:15347300:15348121:+@chr2R:15356295:15357843:+@chr2R:15358102:15358317:+.A.se_chr2R:15347300:15348121:+@chr2R:15356295:15357843:+@chr2R:15358102:15358317:+.A.dn','chr2R:15347300:15348121:+@chr2R:15356295:15357843:+@chr2R:15358102:15358317:+.B.up_chr2R:15347300:15348121:+@chr2R:15356295:15357843:+@chr2R:153581…	(0,0):774,(0,1):54,(1,0):845,(1,1):285	0:1067,1:117	(0,0):1809,(0,1):63,(1,0):1967,(1,1):432	0:2351,1:111	chr2R	+	1534730015347300	1535831715358310
179	CG13124	chr2L:9907608:9907783:-@chr2L:9907051:9907547:-	ri	0.03	0.01	0.06	0.15	0.11	0.19	-0.12	978437	'chr2L:9907608:9907783:-@chr2L:9907051:9907547:-.A.withRI','chr2L:9907608:9907783:-@chr2L:9907051:9907547:-.B.dn_chr2L:9907608:9907783:-@chr2L:9907051:9907547:-.B.up'	(0,0):133,(0,1):45,(1,0):2,(1,1):238	0:11,1:274	(0,0):513,(0,1):127,(1,0):44,(1,1):692	0:114,1:749	chr2L	-	99070519907051	99077839907783
180	CG42837	chr2R:12083891:12084107|12084077:+@chr2R:12084197:12084459:+	a5ss	0.54	0.5	0.58	0.66	0.62	0.7	-0.12	9819.17	'chr2R:12083891:12084107|12084077:+@chr2R:12084197:12084459:+.A.coreAndExt_chr2R:12083891:12084107|12084077:+@chr2R:12084197:12084459:+.A.dn','chr2R:12083891:12084107|12084077:+@chr2R:12084197:12084459:+.B.core_chr2R:12083891:12084107|12084077:+@chr2R:12084197:12084459:+.B.dn'	(0,0):24,(0,1):172,(1,0):392,(1,1):716	0:722,1:558	(0,0):65,(0,1):121,(1,0):521,(1,1):759	0:987,1:414	chr2R	+	1208389112083890	1208445912084450
181	Gapdh2	chrX:15762153:15762276:+@chrX:15762351:15763694:+	ri	0	0	0.01	0.12	0.11	0.13	-0.12	1000000000000	'chrX:15762153:15762276:+@chrX:15762351:15763694:+.A.withRI','chrX:15762153:15762276:+@chrX:15762351:15763694:+.B.up_chrX:15762153:15762276:+@chrX:15762351:15763694:+.B.dn'	(0,0):1175,(0,1):1506,(1,0):15,(1,1):48143	0:241,1:49423	(0,0):1058,(0,1):1073,(1,0):499,(1,1):47934	0:6911,1:42595	chrX	+	1576215315762150	1576369415763690
182	Pp1-87B	chr3R:8250333:8251639:-@chr3R:8249673:8249908:-	ri	0.87	0.82	0.92	0.99	0.99	1	-0.12	9.68429e+07	'chr3R:8250333:8251639:-@chr3R:8249673:8249908:-.A.withRI','chr3R:8250333:8251639:-@chr3R:8249673:8249908:-.B.dn_chr3R:8250333:8251639:-@chr3R:8249673:8249908:-.B.up'	(0,0):935,(0,1):3,(1,0):1295,(1,1):4632	0:5220,1:710	(0,0):2003,(0,1):4,(1,0):3299,(1,1):6654	0:9933,1:24	chr3R	-	82496738249673	82516398251639
183	DIP1	chrX:21501001:21501058:-@chrX:21497340:21497917:-	ri	0.25	0.22	0.29	0.37	0.34	0.41	-0.12	4460.9	'chrX:21501001:21501058:-@chrX:21497340:21497917:-.A.withRI','chrX:21501001:21501058:-@chrX:21497340:21497917:-.B.dn_chrX:21501001:21501058:-@chrX:21497340:21497917:-.B.up'	(0,0):257,(0,1):1,(1,0):616,(1,1):346	0:711,1:252	(0,0):717,(1,0):1464,(1,1):558	0:1672,1:350	chrX	-	2149734021497340	2150105821501050
184	mthl3	chr2R:13340068:13340078:-@chr2R:13338034:13338537:-	ri	0.06	0.05	0.08	0.18	0.16	0.2	-0.12	1000000000000	'chr2R:13340068:13340078:-@chr2R:13338034:13338537:-.A.withRI','chr2R:13340068:13340078:-@chr2R:13338034:13338537:-.B.dn_chr2R:13340068:13340078:-@chr2R:13338034:13338537:-.B.up'	(0,0):153,(1,0):90,(1,1):299	0:106,1:283	(0,0):327,(0,1):17,(1,0):650,(1,1):726	0:780,1:613	chr2R	-	1333803413338030	1334007813340070
185	SclA, SclB	chr2L:16840165:16840208:+@chr2L:16840270:16840578:+	ri	0.03	0.02	0.04	0.14	0.12	0.15	-0.11	1000000000000	'chr2L:16840165:16840208:+@chr2L:16840270:16840578:+.A.withRI','chr2L:16840165:16840208:+@chr2L:16840270:16840578:+.B.up_chr2L:16840165:16840208:+@chr2L:16840270:16840578:+.B.dn'	(0,0):813,(0,1):191,(1,0):14,(1,1):695	0:30,1:870	(0,0):3131,(0,1):632,(1,0):313,(1,1):3135	0:708,1:3372	chr2L	+	1684016516840160	1684057816840570
186	Rm62	chr3R:1834273:1834276:-@chr3R:1833759:1834028:-	ri	0.02	0.02	0.03	0.13	0.12	0.14	-0.11	1000000000000	'chr3R:1834273:1834276:-@chr3R:1833759:1834028:-.A.withRI','chr3R:1834273:1834276:-@chr3R:1833759:1834028:-.B.dn_chr3R:1834273:1834276:-@chr3R:1833759:1834028:-.B.up'	(0,0):429,(0,1):76,(1,0):60,(1,1):857	0:92,1:901	(0,0):1273,(0,1):122,(1,0):733,(1,1):1848	0:969,1:1734	chr3R	-	18337591833759	18342761834276
187	CG33995, CG44001	chr2L:5047273:5047479:+@chr2L:5047543:5048366:+	ri	0.03	0.01	0.04	0.14	0.12	0.17	-0.11	1000000000000	'chr2L:5047273:5047479:+@chr2L:5047543:5048366:+.A.withRI','chr2L:5047273:5047479:+@chr2L:5047543:5048366:+.B.up_chr2L:5047273:5047479:+@chr2L:5047543:5048366:+.B.dn'	(0,0):123,(0,1):227,(1,0):11,(1,1):1661	0:36,1:1863	(0,0):143,(0,1):269,(1,0):90,(1,1):2071	0:365,1:2065	chr2L	+	50472735047273	50483665048366
188	Gbeta13F	chrX:15754159:15754283:+@chrX:15755168|15755417:15755519:+	a3ss	0.15	0.12	0.19	0.26	0.22	0.3	-0.11	48.48	'chrX:15754159:15754283:+@chrX:15755168|15755417:15755519:+.A.up_chrX:15754159:15754283:+@chrX:15755168|15755417:15755519:+.A.coreAndExt','chrX:15754159:15754283:+@chrX:15755168|15755417:15755519:+.B.up_chrX:15754159:15754283:+@chrX:15755168|15755417:15755519:+.B.core'	(0,0):318,(0,1):80,(1,0):84,(1,1):17	0:85,1:96	(0,0):523,(0,1):127,(1,0):244,(1,1):17	0:250,1:138	chrX	+	1575415915754150	1575551915755510
189	PGRP-LC	chr3L:9334423:9334491:+@chr3L:9335265:9336229:+	ri	0.04	0.02	0.08	0.15	0.12	0.19	-0.11	307664	'chr3L:9334423:9334491:+@chr3L:9335265:9336229:+.A.withRI','chr3L:9334423:9334491:+@chr3L:9335265:9336229:+.B.up_chr3L:9334423:9334491:+@chr3L:9335265:9336229:+.B.dn'	(0,0):33,(1,0):10,(1,1):272	0:28,1:254	(0,0):57,(0,1):6,(1,0):82,(1,1):562	0:151,1:499	chr3L	+	93344239334423	93362299336229
190	Tango11	chr2R:17607360:17607455:-@chr2R:17606586:17607188:-	ri	0.09	0.05	0.13	0.2	0.15	0.25	-0.11	12.56	'chr2R:17607360:17607455:-@chr2R:17606586:17607188:-.A.withRI','chr2R:17607360:17607455:-@chr2R:17606586:17607188:-.B.dn_chr2R:17607360:17607455:-@chr2R:17606586:17607188:-.B.up'	(0,0):55,(0,1):19,(1,0):21,(1,1):569	0:42,1:567	(0,0):87,(0,1):34,(1,0):67,(1,1):617	0:174,1:544	chr2R	-	1760658617606580	1760745517607450
191	Hrb27C	chr2L:6920793:6920861:+@chr2L:6922638:6922826:+@chr2L:6923784:6924400:+	se	0.47	0.43	0.51	0.58	0.55	0.6	-0.11	3404.89	'chr2L:6920793:6920861:+@chr2L:6922638:6922826:+@chr2L:6923784:6924400:+.A.up_chr2L:6920793:6920861:+@chr2L:6922638:6922826:+@chr2L:6923784:6924400:+.A.se_chr2L:6920793:6920861:+@chr2L:6922638:6922826:+@chr2L:6923784:6924400:+.A.dn','chr2L:6920793:6920861:+@chr2L:6922638:6922826:+@chr2L:6923784:6924400:+.B.up_chr2L:6920793:6920861:+@chr2L:6922638:6922826:+@chr2L:6923784:6924400:+.B.dn'	(0,0):944,(0,1):105,(1,0):554,(1,1):2269	0:1632,1:1296	(0,0):1693,(0,1):336,(1,0):1295,(1,1):2435	0:2625,1:1441	chr2L	+	69207936920793	69244006924400
192	Pdk1	chr3L:131849:131958:+@chr3L:135458:135842:+	ri	0.16	0.12	0.21	0.27	0.23	0.32	-0.11	15.45	'chr3L:131849:131958:+@chr3L:135458:135842:+.A.withRI','chr3L:131849:131958:+@chr3L:135458:135842:+.B.up_chr3L:131849:131958:+@chr3L:135458:135842:+.B.dn'	(0,0):75,(1,0):167,(1,1):90	0:172,1:85	(0,0):205,(1,0):577,(1,1):180	0:638,1:119	chr3L	+	131849131849	135842135842
193	CG6145	chr2R:9434020:9434521:-@chr2R:9426477:9426854:-	ri	0.1	0.08	0.12	0.21	0.18	0.23	-0.11	1000000000000	'chr2R:9434020:9434521:-@chr2R:9426477:9426854:-.A.withRI','chr2R:9434020:9434521:-@chr2R:9426477:9426854:-.B.dn_chr2R:9434020:9434521:-@chr2R:9426477:9426854:-.B.up'	(0,0):169,(0,1):24,(1,0):204,(1,1):171	0:215,1:184	(0,0):348,(0,1):31,(1,0):872,(1,1):358	0:969,1:292	chr2R	-	94264779426477	94345219434521
194	Kat60	chr3R:1055429:1055550:-@chr3R:1053999:1054558:-	ri	0.04	0.02	0.07	0.15	0.11	0.2	-0.11	81.01	'chr3R:1055429:1055550:-@chr3R:1053999:1054558:-.A.withRI','chr3R:1055429:1055550:-@chr3R:1053999:1054558:-.B.dn_chr3R:1055429:1055550:-@chr3R:1053999:1054558:-.B.up'	(0,0):34,(0,1):37,(1,0):11,(1,1):97	0:12,1:133	(0,0):75,(0,1):58,(1,0):61,(1,1):116	0:78,1:157	chr3R	-	10539991053999	10555501055550
195	Gs1	chr2L:132060:132255:+@chr2L:132483:133995:+	ri	0.08	0.07	0.09	0.18	0.16	0.19	-0.1	1000000000000	'chr2L:132060:132255:+@chr2L:132483:133995:+.A.withRI','chr2L:132060:132255:+@chr2L:132483:133995:+.B.up_chr2L:132060:132255:+@chr2L:132483:133995:+.B.dn'	(0,0):2050,(0,1):529,(1,0):214,(1,1):12815	0:1246,1:12312	(0,0):2161,(0,1):584,(1,0):495,(1,1):13174	0:2873,1:11380	chr2L	+	132060132060	133995133995
196	CG33713, SLIRP1	chrX:21190250:21190299:-@chrX:21188961:21190167:-	ri	0.02	0.01	0.04	0.12	0.09	0.15	-0.1	1000000000000	'chrX:21190250:21190299:-@chrX:21188961:21190167:-.A.withRI','chrX:21190250:21190299:-@chrX:21188961:21190167:-.B.dn_chrX:21190250:21190299:-@chrX:21188961:21190167:-.B.up'	(0,0):91,(0,1):148,(1,0):6,(1,1):2251	0:30,1:2375	(0,0):200,(0,1):127,(1,0):55,(1,1):3845	0:438,1:3589	chrX	-	2118896121188960	2119029921190290
197	Pdk1	chr3L:132702:132809:+@chr3L:135458:135842:+	ri	0.08	0.06	0.11	0.18	0.15	0.21	-0.1	750061	'chr3L:132702:132809:+@chr3L:135458:135842:+.A.withRI','chr3L:132702:132809:+@chr3L:135458:135842:+.B.up_chr3L:132702:132809:+@chr3L:135458:135842:+.B.dn'	(0,0):39,(0,1):5,(1,0):65,(1,1):89	0:71,1:88	(0,0):117,(0,1):2,(1,0):291,(1,1):179	0:325,1:147	chr3L	+	132702132702	135842135842
198	RpL15	chr3LHet:2397802:2398017:+@chr3LHet:2398128:2398454:+	ri	0.12	0.11	0.13	0.22	0.21	0.23	-0.1	1000000000000	'chr3LHet:2397802:2398017:+@chr3LHet:2398128:2398454:+.A.withRI','chr3LHet:2397802:2398017:+@chr3LHet:2398128:2398454:+.B.up_chr3LHet:2397802:2398017:+@chr3LHet:2398128:2398454:+.B.dn'	(0,0):4174,(0,1):14,(1,0):870,(1,1):22924	0:3708,1:20100	(0,0):3183,(0,1):34,(1,0):2156,(1,1):29854	0:8750,1:23294	chr3LHet	+	23978022397802	23984542398454
199	bic	chr2R:8757760:8757835:+@chr2R:8757908:8759608:+	ri	0.02	0.01	0.02	0.12	0.11	0.13	-0.1	1000000000000	'chr2R:8757760:8757835:+@chr2R:8757908:8759608:+.A.withRI','chr2R:8757760:8757835:+@chr2R:8757908:8759608:+.B.up_chr2R:8757760:8757835:+@chr2R:8757908:8759608:+.B.dn'	(0,0):436,(0,1):1452,(1,0):43,(1,1):18578	0:267,1:19806	(0,0):907,(0,1):2571,(1,0):691,(1,1):37093	0:4865,1:35490	chr2R	+	87577608757760	87596088759608
200	Pdk1	chr3L:131849:131933:+@chr3L:135458:135842:+	ri	0.15	0.12	0.19	0.25	0.21	0.29	-0.1	10.09	'chr3L:131849:131933:+@chr3L:135458:135842:+.A.withRI','chr3L:131849:131933:+@chr3L:135458:135842:+.B.up_chr3L:131849:131933:+@chr3L:135458:135842:+.B.dn'	(0,0):75,(1,0):168,(1,1):89	0:176,1:81	(0,0):205,(1,0):577,(1,1):180	0:607,1:150	chr3L	+	131849131849	135842135842
201	CG42837	chr2R:12083891:12084077:+@chr2R:12084197:12084459:+	ri	0.16	0.14	0.18	0.26	0.24	0.29	-0.1	4914.51	'chr2R:12083891:12084077:+@chr2R:12084197:12084459:+.A.withRI','chr2R:12083891:12084077:+@chr2R:12084197:12084459:+.B.up_chr2R:12083891:12084077:+@chr2R:12084197:12084459:+.B.dn'	(0,0):256,(0,1):254,(1,0):160,(1,1):634	0:229,1:819	(0,0):262,(0,1):186,(1,0):324,(1,1):694	0:430,1:774	chr2R	+	1208389112083890	1208445912084450
202	CG6145	chr2R:9432813:9432928:-@chr2R:9426477:9426854:-	ri	0.08	0.06	0.1	0.18	0.16	0.21	-0.1	1000000000000	'chr2R:9432813:9432928:-@chr2R:9426477:9426854:-.A.withRI','chr2R:9432813:9432928:-@chr2R:9426477:9426854:-.B.dn_chr2R:9432813:9432928:-@chr2R:9426477:9426854:-.B.up'	(0,0):175,(0,1):1,(1,0):191,(1,1):119	0:204,1:107	(0,0):353,(0,1):6,(1,0):812,(1,1):215	0:854,1:179	chr2R	-	94264779426477	94329289432928
203	Irp-1B	chr3R:6236501:6237011:-@chr3R:6236338:6236438:-	ri	0.01	0	0.02	0.11	0.08	0.14	-0.1	1000000000000	'chr3R:6236501:6237011:-@chr3R:6236338:6236438:-.A.withRI','chr3R:6236501:6237011:-@chr3R:6236338:6236438:-.B.dn_chr3R:6236501:6237011:-@chr3R:6236338:6236438:-.B.up'	(0,0):282,(0,1):144,(1,0):3,(1,1):1389	0:12,1:1524	(0,0):358,(0,1):157,(1,0):61,(1,1):2196	0:245,1:2169	chr3R	-	62363386236338	62370116237011
204	PMCA	chr4:363548:363686:-@chr4:350897:350965:-	ri	0.12	0.09	0.15	0.22	0.18	0.27	-0.1	308.35	'chr4:363548:363686:-@chr4:350897:350965:-.A.withRI','chr4:363548:363686:-@chr4:350897:350965:-.B.dn_chr4:363548:363686:-@chr4:350897:350965:-.B.up'	(0,0):528,(0,1):32,(1,0):2279,(1,1):33	0:2285,1:59	(0,0):951,(0,1):38,(1,0):5606,(1,1):36	0:5617,1:63	chr4	-	350897350897	363686363686
205	CG32425	chr3L:20503132:20503879:+@chr3L:20503986|20505037:20505485:+	a3ss	0.09	0.07	0.1	0.19	0.17	0.22	-0.1	1000000000000	'chr3L:20503132:20503879:+@chr3L:20503986|20505037:20505485:+.A.up_chr3L:20503132:20503879:+@chr3L:20503986|20505037:20505485:+.A.coreAndExt','chr3L:20503132:20503879:+@chr3L:20503986|20505037:20505485:+.B.up_chr3L:20503132:20503879:+@chr3L:20503986|20505037:20505485:+.B.core'	(0,0):813,(0,1):12,(1,0):157,(1,1):1679	0:344,1:1504	(0,0):1514,(0,1):29,(1,0):366,(1,1):1727	0:717,1:1405	chr3L	+	2050313220503130	2050548520505480
206	CG6891	chrX:18670530:18670681:+@chrX:18674714:18675037:+	ri	0	0	0.01	0.1	0.08	0.12	-0.1	1000000000000	'chrX:18670530:18670681:+@chrX:18674714:18675037:+.A.withRI','chrX:18670530:18670681:+@chrX:18674714:18675037:+.B.up_chrX:18670530:18670681:+@chrX:18674714:18675037:+.B.dn'	(0,0):1077,(1,0):85,(1,1):1264	0:90,1:1259	(0,0):159,(1,0):173,(1,1):123	0:183,1:113	chrX	+	1867053018670530	1867503718675030
207	Rap1	chr3L:1862304:1862178|1861778:-@chr3L:1859105:1861676:-	a5ss	0.07	0.05	0.09	0.17	0.14	0.19	-0.1	1000000000000	'chr3L:1862304:1862178|1861778:-@chr3L:1859105:1861676:-.A.dn_chr3L:1862304:1862178|1861778:-@chr3L:1859105:1861676:-.A.coreAndExt','chr3L:1862304:1862178|1861778:-@chr3L:1859105:1861676:-.B.dn_chr3L:1862304:1862178|1861778:-@chr3L:1859105:1861676:-.B.core'	(0,0):305,(0,1):1,(1,0):38,(1,1):3649	0:325,1:3363	(0,0):1159,(0,1):1,(1,0):136,(1,1):5142	0:1034,1:4245	chr3L	-	18591051859105	18623041862304
208	AGO1	chr2R:9840554:9840622:-@chr2R:9837637:9838422:-	ri	0.04	0.03	0.06	0.14	0.11	0.17	-0.1	1000000000000	'chr2R:9840554:9840622:-@chr2R:9837637:9838422:-.A.withRI','chr2R:9840554:9840622:-@chr2R:9837637:9838422:-.B.dn_chr2R:9840554:9840622:-@chr2R:9837637:9838422:-.B.up'	(0,0):59,(1,0):30,(1,1):231	0:41,1:220	(0,0):121,(1,0):120,(1,1):260	0:148,1:232	chr2R	-	98376379837637	98406229840622
209	Atg18a	chr3L:8180913:8181680:+@chr3L:8182387:8182545:+	ri	0.06	0.04	0.07	0.16	0.13	0.2	-0.1	1000000000000	'chr3L:8180913:8181680:+@chr3L:8182387:8182545:+.A.withRI','chr3L:8180913:8181680:+@chr3L:8182387:8182545:+.B.up_chr3L:8180913:8181680:+@chr3L:8182387:8182545:+.B.dn'	(0,0):132,(0,1):104,(1,0):47,(1,1):654	0:83,1:722	(0,0):95,(0,1):33,(1,0):98,(1,1):544	0:181,1:494	chr3L	+	81809138180913	81825458182545
210	VhaPPA1-1	chr3R:10729673:10729907:-@chr3R:10728934:10729613:-	ri	0.04	0.04	0.05	0.13	0.11	0.15	-0.09	1000000000000	'chr3R:10729673:10729907:-@chr3R:10728934:10729613:-.A.withRI','chr3R:10729673:10729907:-@chr3R:10728934:10729613:-.B.dn_chr3R:10729673:10729907:-@chr3R:10728934:10729613:-.B.up'	(0,0):629,(0,1):1161,(1,0):85,(1,1):5087	0:293,1:6040	(0,0):1500,(0,1):1020,(1,0):222,(1,1):4222	0:697,1:4767	chr3R	-	1072893410728930	1072990710729900
211	eIF-4a	chr2L:5985026:5985220:+@chr2L:5985339:5985559:+	ri	0.18	0.17	0.18	0.27	0.26	0.27	-0.09	1000000000000	'chr2L:5985026:5985220:+@chr2L:5985339:5985559:+.A.withRI','chr2L:5985026:5985220:+@chr2L:5985339:5985559:+.B.up_chr2L:5985026:5985220:+@chr2L:5985339:5985559:+.B.dn'	(0,0):2210,(0,1):3603,(1,0):2015,(1,1):5113	0:2633,1:8098	(0,0):4563,(0,1):9002,(1,0):8086,(1,1):11237	0:10195,1:18130	chr2L	+	59850265985026	59855595985559
212	Phb2	chr2R:14708689:14708788:+@chr2R:14709481:14709793:+	ri	0.84	0.81	0.87	0.93	0.92	0.95	-0.09	1000000000000	'chr2R:14708689:14708788:+@chr2R:14709481:14709793:+.A.withRI','chr2R:14708689:14708788:+@chr2R:14709481:14709793:+.B.up_chr2R:14708689:14708788:+@chr2R:14709481:14709793:+.B.dn'	(0,0):218,(0,1):79,(1,0):2048,(1,1):90	0:2123,1:94	(0,0):505,(0,1):73,(1,0):4645,(1,1):100	0:4734,1:84	chr2R	+	1470868914708680	1470979314709790
213	RpL15	chr3LHet:2397802:2398001:+@chr3LHet:2398128:2398454:+	ri	0.1	0.09	0.11	0.19	0.18	0.2	-0.09	1000000000000	'chr3LHet:2397802:2398001:+@chr3LHet:2398128:2398454:+.A.withRI','chr3LHet:2397802:2398001:+@chr3LHet:2398128:2398454:+.B.up_chr3LHet:2397802:2398001:+@chr3LHet:2398128:2398454:+.B.dn'	(0,0):4175,(0,1):13,(1,0):891,(1,1):22903	0:3111,1:20696	(0,0):3189,(0,1):28,(1,0):2174,(1,1):29836	0:7628,1:24410	chr3LHet	+	23978022397802	23984542398454
214	CG8974	chrX:15689998:15690082:-@chrX:15688530:15689134:-	ri	0.04	0.03	0.05	0.13	0.12	0.15	-0.09	1000000000000	'chrX:15689998:15690082:-@chrX:15688530:15689134:-.A.withRI','chrX:15689998:15690082:-@chrX:15688530:15689134:-.B.dn_chrX:15689998:15690082:-@chrX:15688530:15689134:-.B.up'	(0,0):362,(0,1):13,(1,0):90,(1,1):1170	0:145,1:1128	(0,0):641,(0,1):20,(1,0):290,(1,1):1192	0:463,1:1039	chrX	-	1568853015688530	1569008215690080
215	Pdk1	chr3L:131849:131913:+@chr3L:135458:135842:+	ri	0.14	0.1	0.18	0.23	0.19	0.27	-0.09	10.82	'chr3L:131849:131913:+@chr3L:135458:135842:+.A.withRI','chr3L:131849:131913:+@chr3L:135458:135842:+.B.up_chr3L:131849:131913:+@chr3L:135458:135842:+.B.dn'	(0,0):75,(1,0):168,(1,1):89	0:180,1:77	(0,0):205,(1,0):578,(1,1):179	0:619,1:138	chr3L	+	131849131849	135842135842
216	bbg	chr3L:14469474:14469788:-@chr3L:14407867:14410295:-	ri	0.91	0.88	0.94	1	1	1	-0.09	1000000000000	'chr3L:14469474:14469788:-@chr3L:14407867:14410295:-.A.withRI','chr3L:14469474:14469788:-@chr3L:14407867:14410295:-.B.dn_chr3L:14469474:14469788:-@chr3L:14407867:14410295:-.B.up'	(0,0):1256,(0,1):11,(1,0):39699,(1,1):1750	0:41265,1:195	(0,0):7195,(0,1):16,(1,0):481610,(1,1):3391	0:485001,1:16	chr3L	-	1440786714407860	1446978814469780
217	fbl	chr3L:20377531:20377958:+@chr3L:20381769:20381947:+	ri	0.11	0.1	0.13	0.2	0.18	0.22	-0.09	1000000000000	'chr3L:20377531:20377958:+@chr3L:20381769:20381947:+.A.withRI','chr3L:20377531:20377958:+@chr3L:20381769:20381947:+.B.up_chr3L:20377531:20377958:+@chr3L:20381769:20381947:+.B.dn'	(0,0):389,(0,1):135,(1,0):649,(1,1):452	0:699,1:537	(0,0):676,(0,1):150,(1,0):1260,(1,1):466	0:1348,1:528	chr3L	+	2037753120377530	2038194720381940
218	CG4019	chr2R:19496454:19496728:-@chr2R:19495655:19496204:-	ri	0.02	0.01	0.03	0.11	0.09	0.12	-0.09	1000000000000	'chr2R:19496454:19496728:-@chr2R:19495655:19496204:-.A.withRI','chr2R:19496454:19496728:-@chr2R:19495655:19496204:-.B.dn_chr2R:19496454:19496728:-@chr2R:19495655:19496204:-.B.up'	(0,0):560,(0,1):72,(1,0):21,(1,1):2169	0:48,1:2214	(0,0):913,(0,1):79,(1,0):183,(1,1):4040	0:626,1:3676	chr2R	-	1949565519495650	1949672819496720
219	Rbp1	chr3R:6610279:6610645:+@chr3R:6611880:6612229:+	ri	0.06	0.06	0.07	0.15	0.13	0.16	-0.09	1000000000000	'chr3R:6610279:6610645:+@chr3R:6611880:6612229:+.A.withRI','chr3R:6610279:6610645:+@chr3R:6611880:6612229:+.B.up_chr3R:6610279:6610645:+@chr3R:6611880:6612229:+.B.dn'	(0,0):263,(0,1):357,(1,0):230,(1,1):993	0:284,1:1296	(0,0):280,(0,1):225,(1,0):326,(1,1):560	0:396,1:715	chr3R	+	66102796610279	66122296612229
220	ND-ACP	chr3L:1330131:1330290:+@chr3L:1330863:1330863:+@chr3L:1331042:1331042:+@chr3L:1331280:1331633:+	mxe	0.4	0.38	0.41	0.48	0.47	0.5	-0.08	1000000000000	'chr3L:1330131:1330290:+@chr3L:1330863:1330863:+@chr3L:1331042:1331042:+@chr3L:1331280:1331633:+.A.up_chr3L:1330131:1330290:+@chr3L:1330863:1330863:+@chr3L:1331042:1331042:+@chr3L:1331280:1331633:+.A.mxe1_chr3L:1330131:1330290:+@chr3L:1330863:1330863:+@chr3L:1331042:1331042:+@chr3L:1331280:1331633:+.A.dn','chr3L:1330131:1330290:+@chr3L:1330863:1330863:+@chr3L:1331042:1331042:+@chr3L:1331280:13316…	(0,0):971,(0,1):2070,(1,0):1176,(1,1):1806	0:1981,1:3071	(0,0):1940,(0,1):2712,(1,0):2204,(1,1):3063	0:3750,1:4229	chr3L	+	13301311330131	13316331331633
221	FER	chr3R:5219963:5220293:-@chr3R:5218463:5218694:-	ri	0.02	0.01	0.04	0.1	0.08	0.13	-0.08	1000000000000	'chr3R:5219963:5220293:-@chr3R:5218463:5218694:-.A.withRI','chr3R:5219963:5220293:-@chr3R:5218463:5218694:-.B.dn_chr3R:5219963:5220293:-@chr3R:5218463:5218694:-.B.up'	(0,0):5,(0,1):33,(1,0):5,(1,1):46	0:5,1:79	(0,0):14,(0,1):90,(1,0):92,(1,1):129	0:109,1:202	chr3R	-	52184635218463	52202935220293
222	Pdk1	chr3L:134028:134081:+@chr3L:135458:135842:+	ri	0.08	0.06	0.11	0.16	0.13	0.19	-0.08	30.63	'chr3L:134028:134081:+@chr3L:135458:135842:+.A.withRI','chr3L:134028:134081:+@chr3L:135458:135842:+.B.up_chr3L:134028:134081:+@chr3L:135458:135842:+.B.dn'	(0,0):34,(1,0):40,(1,1):89	0:47,1:82	(0,0):110,(0,1):1,(1,0):160,(1,1):179	0:176,1:164	chr3L	+	134028134028	135842135842
223	Rab11	chr3R:16937129:16937188:+@chr3R:16937377:16937577:+	ri	0.06	0.05	0.06	0.14	0.13	0.15	-0.08	1000000000000	'chr3R:16937129:16937188:+@chr3R:16937377:16937577:+.A.withRI','chr3R:16937129:16937188:+@chr3R:16937377:16937577:+.B.up_chr3R:16937129:16937188:+@chr3R:16937377:16937577:+.B.dn'	(0,0):243,(0,1):553,(1,0):195,(1,1):672	0:233,1:1187	(0,0):93,(0,1):720,(1,0):726,(1,1):1075	0:893,1:1628	chr3R	+	1693712916937120	1693757716937570
224	Pdk1	chr3L:132867:132935:+@chr3L:135458:135842:+	ri	0.07	0.05	0.1	0.15	0.13	0.19	-0.08	99.58	'chr3L:132867:132935:+@chr3L:135458:135842:+.A.withRI','chr3L:132867:132935:+@chr3L:135458:135842:+.B.up_chr3L:132867:132935:+@chr3L:135458:135842:+.B.dn'	(0,0):35,(0,1):1,(1,0):63,(1,1):89	0:69,1:84	(0,0):118,(0,1):1,(1,0):272,(1,1):179	0:295,1:157	chr3L	+	132867132867	135842135842
225	gammaCOP	chr3R:27397819:27398000:+@chr3R:27398223:27398878:+	ri	0.03	0.02	0.05	0.11	0.09	0.14	-0.08	1000000000000	'chr3R:27397819:27398000:+@chr3R:27398223:27398878:+.A.withRI','chr3R:27397819:27398000:+@chr3R:27398223:27398878:+.B.up_chr3R:27397819:27398000:+@chr3R:27398223:27398878:+.B.dn'	(0,0):156,(0,1):190,(1,0):16,(1,1):701	0:52,1:855	(0,0):128,(0,1):271,(1,0):77,(1,1):685	0:166,1:867	chr3R	+	2739781927397810	2739887827398870
226	gammaCOP	chr3R:27397819:27398000:+@chr3R:27398220:27398878:+	ri	0.04	0.02	0.06	0.12	0.1	0.15	-0.08	7.84268e+09	'chr3R:27397819:27398000:+@chr3R:27398220:27398878:+.A.withRI','chr3R:27397819:27398000:+@chr3R:27398220:27398878:+.B.up_chr3R:27397819:27398000:+@chr3R:27398220:27398878:+.B.dn'	(0,0):195,(0,1):151,(1,0):16,(1,1):701	0:51,1:817	(0,0):157,(0,1):242,(1,0):77,(1,1):685	0:159,1:845	chr3R	+	2739781927397810	2739887827398870
227	CG8974	chrX:15689926:15690082:-@chrX:15688530:15689134:-	ri	0.03	0.03	0.04	0.11	0.1	0.13	-0.08	1000000000000	'chrX:15689926:15690082:-@chrX:15688530:15689134:-.A.withRI','chrX:15689926:15690082:-@chrX:15688530:15689134:-.B.dn_chrX:15689926:15690082:-@chrX:15688530:15689134:-.B.up'	(0,0):244,(0,1):131,(1,0):67,(1,1):1193	0:111,1:1280	(0,0):494,(0,1):167,(1,0):242,(1,1):1240	0:369,1:1280	chrX	-	1568853015688530	1569008215690080
228	IntS3	chr2R:129594:130204:-@chr2R:126028:126661:-	ri	0.05	0.04	0.07	0.13	0.11	0.15	-0.08	1000000000000	'chr2R:129594:130204:-@chr2R:126028:126661:-.A.withRI','chr2R:129594:130204:-@chr2R:126028:126661:-.B.dn_chr2R:129594:130204:-@chr2R:126028:126661:-.B.up'	(0,0):60,(0,1):55,(1,0):78,(1,1):445	0:98,1:480	(0,0):82,(0,1):67,(1,0):229,(1,1):546	0:295,1:547	chr2R	-	126028126028	130204130204
229	RpL15	chr3LHet:2397802:2397991:+@chr3LHet:2398128:2398454:+	ri	0.09	0.09	0.1	0.17	0.16	0.17	-0.08	1000000000000	'chr3LHet:2397802:2397991:+@chr3LHet:2398128:2398454:+.A.withRI','chr3LHet:2397802:2397991:+@chr3LHet:2398128:2398454:+.B.up_chr3LHet:2397802:2397991:+@chr3LHet:2398128:2398454:+.B.dn'	(0,0):4168,(0,1):20,(1,0):892,(1,1):22902	0:3071,1:20743	(0,0):3168,(0,1):49,(1,0):2178,(1,1):29832	0:7165,1:24894	chr3LHet	+	23978022397802	23984542398454
230	CG17734	chr3R:7068546:7068735:-@chr3R:7067930:7068285:-	ri	0.02	0.02	0.03	0.1	0.09	0.11	-0.08	1000000000000	'chr3R:7068546:7068735:-@chr3R:7067930:7068285:-.A.withRI','chr3R:7068546:7068735:-@chr3R:7067930:7068285:-.B.dn_chr3R:7068546:7068735:-@chr3R:7067930:7068285:-.B.up'	(0,0):226,(0,1):873,(1,0):52,(1,1):1028	0:80,1:1873	(0,0):257,(0,1):1306,(1,0):354,(1,1):1263	0:511,1:2412	chr3R	-	70679307067930	70687357068735
231	ATPsynE	chr3R:10152746:10152810:+@chr3R:10152975:10153473:+	ri	0.04	0.03	0.05	0.12	0.11	0.13	-0.08	1000000000000	'chr3R:10152746:10152810:+@chr3R:10152975:10153473:+.A.withRI','chr3R:10152746:10152810:+@chr3R:10152975:10153473:+.B.up_chr3R:10152746:10152810:+@chr3R:10152975:10153473:+.B.dn'	(0,0):1483,(0,1):3,(1,0):97,(1,1):5585	0:301,1:5384	(0,0):2668,(1,0):482,(1,1):9090	0:1614,1:7958	chr3R	+	1015274610152740	1015347310153470
232	CG9451	chr3L:19493638:19494022:-@chr3L:19492723:19492821:-	ri	0.01	0	0.03	0.09	0.08	0.11	-0.08	1000000000000	'chr3L:19493638:19494022:-@chr3L:19492723:19492821:-.A.withRI','chr3L:19493638:19494022:-@chr3L:19492723:19492821:-.B.dn_chr3L:19493638:19494022:-@chr3L:19492723:19492821:-.B.up'	(0,0):27,(0,1):47,(1,0):3,(1,1):51	0:3,1:98	(0,0):230,(0,1):423,(1,0):268,(1,1):374	0:293,1:772	chr3L	-	1949272319492720	1949402219494020
233	CG8974	chrX:15690035:15690082:-@chrX:15688530:15689134:-	ri	0.04	0.03	0.05	0.12	0.1	0.13	-0.08	1000000000000	'chrX:15690035:15690082:-@chrX:15688530:15689134:-.A.withRI','chrX:15690035:15690082:-@chrX:15688530:15689134:-.B.dn_chrX:15690035:15690082:-@chrX:15688530:15689134:-.B.up'	(0,0):330,(0,1):45,(1,0):90,(1,1):1170	0:142,1:1163	(0,0):628,(0,1):33,(1,0):290,(1,1):1192	0:438,1:1077	chrX	-	1568853015688530	1569008215690080
234	kay	chr3R:25607497:25607565:+@chr3R:25617115:25617442:+	ri	0.05	0.04	0.06	0.13	0.11	0.15	-0.08	1000000000000	'chr3R:25607497:25607565:+@chr3R:25617115:25617442:+.A.withRI','chr3R:25607497:25607565:+@chr3R:25617115:25617442:+.B.up_chr3R:25607497:25607565:+@chr3R:25617115:25617442:+.B.dn'	(0,0):203,(1,0):323,(1,1):128	0:327,1:124	(0,0):675,(0,1):1,(1,0):1651,(1,1):261	0:1685,1:228	chr3R	+	2560749725607490	2561744225617440
235	CG8399	chr2R:11907552:11907620:+@chr2R:11909394:11909881:+	ri	0.01	0	0.02	0.09	0.08	0.11	-0.08	1000000000000	'chr2R:11907552:11907620:+@chr2R:11909394:11909881:+.A.withRI','chr2R:11907552:11907620:+@chr2R:11909394:11909881:+.B.up_chr2R:11907552:11907620:+@chr2R:11909394:11909881:+.B.dn'	(0,0):17,(1,0):5,(1,1):124	0:5,1:124	(0,0):52,(1,0):201,(1,1):451	0:245,1:407	chr2R	+	1190755211907550	1190988111909880
236	CG17508	chr2R:1496109:1496287:+@chr2R:1496518:1496994:+	ri	0.08	0.07	0.09	0.16	0.14	0.17	-0.08	1000000000000	'chr2R:1496109:1496287:+@chr2R:1496518:1496994:+.A.withRI','chr2R:1496109:1496287:+@chr2R:1496518:1496994:+.B.up_chr2R:1496109:1496287:+@chr2R:1496518:1496994:+.B.dn'	(0,0):962,(0,1):351,(1,0):156,(1,1):2680	0:355,1:2832	(0,0):651,(0,1):331,(1,0):302,(1,1):2516	0:670,1:2479	chr2R	+	14961091496109	14969941496994
237	whd	chr2R:6359123:6359461:-@chr2R:6357873:6358254:-	ri	0.03	0.03	0.04	0.11	0.09	0.13	-0.08	1000000000000	'chr2R:6359123:6359461:-@chr2R:6357873:6358254:-.A.withRI','chr2R:6359123:6359461:-@chr2R:6357873:6358254:-.B.dn_chr2R:6359123:6359461:-@chr2R:6357873:6358254:-.B.up'	(0,0):542,(0,1):55,(1,0):48,(1,1):784	0:72,1:815	(0,0):673,(0,1):59,(1,0):134,(1,1):635	0:196,1:632	chr2R	-	63578736357873	63594616359461
238	CG6951, Clc	chr3L:20235590:20235767:+@chr3L:20235885:20236835:+	ri	0.01	0.01	0.01	0.08	0.07	0.1	-0.07	1000000000000	'chr3L:20235590:20235767:+@chr3L:20235885:20236835:+.A.withRI','chr3L:20235590:20235767:+@chr3L:20235885:20236835:+.B.up_chr3L:20235590:20235767:+@chr3L:20235885:20236835:+.B.dn'	(0,0):140,(0,1):639,(1,0):14,(1,1):4414	0:73,1:4994	(0,0):108,(0,1):458,(1,0):112,(1,1):4653	0:463,1:4760	chr3L	+	2023559020235590	2023683520236830
239	CG11876	chr3R:24939716:24939877:+@chr3R:24940816:24941227:+	ri	0.09	0.08	0.1	0.16	0.15	0.17	-0.07	1000000000000	'chr3R:24939716:24939877:+@chr3R:24940816:24941227:+.A.withRI','chr3R:24939716:24939877:+@chr3R:24940816:24941227:+.B.up_chr3R:24939716:24939877:+@chr3R:24940816:24941227:+.B.dn'	(0,0):539,(0,1):528,(1,0):388,(1,1):855	0:464,1:1307	(0,0):897,(0,1):891,(1,0):957,(1,1):873	0:1108,1:1613	chr3R	+	2493971624939710	2494122724941220
240	eIF3ga	chrX:2504279:2504526:-@chrX:2503175:2504215:-	ri	0	0	0.01	0.07	0.06	0.08	-0.07	1000000000000	'chrX:2504279:2504526:-@chrX:2503175:2504215:-.A.withRI','chrX:2504279:2504526:-@chrX:2503175:2504215:-.B.dn_chrX:2504279:2504526:-@chrX:2503175:2504215:-.B.up'	(0,0):77,(0,1):328,(1,0):2,(1,1):4148	0:14,1:4464	(0,0):108,(0,1):802,(1,0):128,(1,1):6574	0:511,1:6993	chrX	-	25031752503175	25045262504526
241	CG8974	chrX:15689909:15690082:-@chrX:15688530:15689134:-	ri	0.03	0.02	0.04	0.1	0.09	0.12	-0.07	1000000000000	'chrX:15689909:15690082:-@chrX:15688530:15689134:-.A.withRI','chrX:15689909:15690082:-@chrX:15688530:15689134:-.B.dn_chrX:15689909:15690082:-@chrX:15688530:15689134:-.B.up'	(0,0):239,(0,1):136,(1,0):61,(1,1):1199	0:105,1:1291	(0,0):480,(0,1):181,(1,0):224,(1,1):1258	0:350,1:1313	chrX	-	1568853015688530	1569008215690080
242	CycG	chr3R:27436603:27436706:-@chr3R:27427138:27427945:-	ri	0.05	0.04	0.05	0.12	0.12	0.12	-0.07	1000000000000	'chr3R:27436603:27436706:-@chr3R:27427138:27427945:-.A.withRI','chr3R:27436603:27436706:-@chr3R:27427138:27427945:-.B.dn_chr3R:27436603:27436706:-@chr3R:27427138:27427945:-.B.up'	(0,0):1135,(0,1):182,(1,0):2153,(1,1):3659	0:2346,1:3648	(0,0):1806,(0,1):384,(1,0):9395,(1,1):5927	0:10109,1:5597	chr3R	-	2742713827427130	2743670627436700
243	CG17124	chr2L:10756296:10755904|10753304:-@chr2L:10745782:10746078:-	a5ss	0.01	0.01	0.02	0.08	0.07	0.1	-0.07	1000000000000	'chr2L:10756296:10755904|10753304:-@chr2L:10745782:10746078:-.A.dn_chr2L:10756296:10755904|10753304:-@chr2L:10745782:10746078:-.A.coreAndExt','chr2L:10756296:10755904|10753304:-@chr2L:10745782:10746078:-.B.dn_chr2L:10756296:10755904|10753304:-@chr2L:10745782:10746078:-.B.core'	(0,0):144,(0,1):221,(1,0):30,(1,1):281	0:31,1:501	(0,0):256,(0,1):92,(1,0):191,(1,1):314	0:218,1:379	chr2L	-	1074578210745780	1075629610756290
244	CycG	chr3R:27436603:27436706:-@chr3R:27427138:27427952:-	ri	0.04	0.04	0.04	0.11	0.11	0.11	-0.07	1000000000000	'chr3R:27436603:27436706:-@chr3R:27427138:27427952:-.A.withRI','chr3R:27436603:27436706:-@chr3R:27427138:27427952:-.B.dn_chr3R:27436603:27436706:-@chr3R:27427138:27427952:-.B.up'	(0,0):840,(0,1):477,(1,0):2140,(1,1):3672	0:2275,1:4014	(0,0):1244,(0,1):946,(1,0):9339,(1,1):5983	0:10050,1:6218	chr3R	-	2742713827427130	2743670627436700
245	CycG, Med	chr3R:27438033:27438078:-@chr3R:27427138:27427952:-	ri	0.04	0.04	0.04	0.11	0.1	0.11	-0.07	1000000000000	'chr3R:27438033:27438078:-@chr3R:27427138:27427952:-.A.withRI','chr3R:27438033:27438078:-@chr3R:27427138:27427952:-.B.dn_chr3R:27438033:27438078:-@chr3R:27427138:27427952:-.B.up'	(0,0):1366,(0,1):1,(1,0):2332,(1,1):3671	0:2475,1:3529	(0,0):2278,(1,0):9680,(1,1):5977	0:10279,1:5378	chr3R	-	2742713827427130	2743807827438070
246	wts	chr3R:26632010:26632317:-@chr3R:26626099:26626685:-	ri	0.04	0.02	0.06	0.11	0.1	0.13	-0.07	4.79153e+11	'chr3R:26632010:26632317:-@chr3R:26626099:26626685:-.A.withRI','chr3R:26632010:26632317:-@chr3R:26626099:26626685:-.B.dn_chr3R:26632010:26632317:-@chr3R:26626099:26626685:-.B.up'	(0,0):10,(0,1):9,(1,0):17,(1,1):57	0:18,1:65	(0,0):27,(0,1):25,(1,0):258,(1,1):268	0:295,1:256	chr3R	-	2662609926626090	2663231726632310
247	CG17746	chr3L:3239422:3239579:-@chr3L:3238612:3238982:-	ri	0.04	0.03	0.06	0.11	0.09	0.14	-0.07	171567	'chr3L:3239422:3239579:-@chr3L:3238612:3238982:-.A.withRI','chr3L:3239422:3239579:-@chr3L:3238612:3238982:-.B.dn_chr3L:3239422:3239579:-@chr3L:3238612:3238982:-.B.up'	(0,0):52,(0,1):108,(1,0):21,(1,1):189	0:29,1:289	(0,0):88,(0,1):192,(1,0):100,(1,1):285	0:125,1:452	chr3L	-	32386123238612	32395793239579
248	CG17124	chr2L:10756296:10755904|10753317:-@chr2L:10745782:10746078:-	a5ss	0.01	0.01	0.02	0.08	0.07	0.1	-0.07	1000000000000	'chr2L:10756296:10755904|10753317:-@chr2L:10745782:10746078:-.A.dn_chr2L:10756296:10755904|10753317:-@chr2L:10745782:10746078:-.A.coreAndExt','chr2L:10756296:10755904|10753317:-@chr2L:10745782:10746078:-.B.dn_chr2L:10756296:10755904|10753317:-@chr2L:10745782:10746078:-.B.core'	(0,0):142,(0,1):221,(1,0):32,(1,1):281	0:33,1:501	(0,0):261,(0,1):92,(1,0):186,(1,1):314	0:211,1:381	chr2L	-	1074578210745780	1075629610756290
249	CG15213	chr3L:5126228:5126503:-@chr3L:5125752:5126168:-	ri	0.01	0	0.03	0.08	0.06	0.09	-0.07	2.80683e+09	'chr3L:5126228:5126503:-@chr3L:5125752:5126168:-.A.withRI','chr3L:5126228:5126503:-@chr3L:5125752:5126168:-.B.dn_chr3L:5126228:5126503:-@chr3L:5125752:5126168:-.B.up'	(0,0):2,(0,1):93,(1,0):1,(1,1):268	0:3,1:359	(0,0):4,(0,1):424,(1,0):72,(1,1):1059	0:145,1:1410	chr3L	-	51257525125752	51265035126503
250	CG8399	chr2R:11905233:11905362:+@chr2R:11909351:11909881:+	ri	0.02	0.01	0.03	0.09	0.08	0.1	-0.07	1000000000000	'chr2R:11905233:11905362:+@chr2R:11909351:11909881:+.A.withRI','chr2R:11905233:11905362:+@chr2R:11909351:11909881:+.B.up_chr2R:11905233:11905362:+@chr2R:11909351:11909881:+.B.dn'	(0,0):36,(0,1):12,(1,0):25,(1,1):127	0:26,1:138	(0,0):133,(0,1):42,(1,0):404,(1,1):490	0:445,1:491	chr2R	+	1190523311905230	1190988111909880
251	AdipoR	chr3R:18372434:18372845:-@chr3R:18370840:18371192:-	ri	0.02	0.02	0.03	0.09	0.08	0.11	-0.07	1000000000000	'chr3R:18372434:18372845:-@chr3R:18370840:18371192:-.A.withRI','chr3R:18372434:18372845:-@chr3R:18370840:18371192:-.B.dn_chr3R:18372434:18372845:-@chr3R:18370840:18371192:-.B.up'	(0,0):1247,(0,1):36,(1,0):58,(1,1):1230	0:83,1:1241	(0,0):1487,(0,1):41,(1,0):327,(1,1):1525	0:477,1:1416	chr3R	-	1837084018370840	1837284518372840
252	RpL10Ab	chr3L:11815955:11815990:+@chr3L:11816300:11816665:+@chr3L:11816758:11817314:+	se	0.26	0.25	0.27	0.33	0.32	0.34	-0.07	1000000000000	'chr3L:11815955:11815990:+@chr3L:11816300:11816665:+@chr3L:11816758:11817314:+.A.up_chr3L:11815955:11815990:+@chr3L:11816300:11816665:+@chr3L:11816758:11817314:+.A.se_chr3L:11815955:11815990:+@chr3L:11816300:11816665:+@chr3L:11816758:11817314:+.A.dn','chr3L:11815955:11815990:+@chr3L:11816300:11816665:+@chr3L:11816758:11817314:+.B.up_chr3L:11815955:11815990:+@chr3L:11816300:11816665:+@chr3L:118167…	(0,0):15384,(0,1):2,(1,0):7064,(1,1):29315	0:14599,1:21782	(0,0):8459,(1,0):7530,(1,1):24406	0:15446,1:16490	chr3L	+	1181595511815950	1181731411817310
253	Pax	chr2L:19403999:19404682:-@chr2L:19400758:19401372:-	ri	0.22	0.21	0.23	0.28	0.27	0.3	-0.06	1000000000000	'chr2L:19403999:19404682:-@chr2L:19400758:19401372:-.A.withRI','chr2L:19403999:19404682:-@chr2L:19400758:19401372:-.B.dn_chr2L:19403999:19404682:-@chr2L:19400758:19401372:-.B.up'	(0,0):1681,(0,1):235,(1,0):2048,(1,1):3495	0:2811,1:2967	(0,0):2688,(0,1):302,(1,0):3793,(1,1):4987	0:5158,1:3924	chr2L	-	1940075819400750	1940468219404680
254	Ect4	chr3L:8094426:8094593:+@chr3L:8095993:8097918:+	ri	0.03	0.02	0.04	0.09	0.08	0.11	-0.06	1000000000000	'chr3L:8094426:8094593:+@chr3L:8095993:8097918:+.A.withRI','chr3L:8094426:8094593:+@chr3L:8095993:8097918:+.B.up_chr3L:8094426:8094593:+@chr3L:8095993:8097918:+.B.dn'	(0,0):133,(1,0):45,(1,1):1820	0:104,1:1761	(0,0):369,(1,0):346,(1,1):4952	0:835,1:4463	chr3L	+	80944268094426	80979188097918
255	ATPsynE	chr3R:10152746:10152849:+@chr3R:10152975:10153473:+	ri	0.01	0.01	0.02	0.07	0.06	0.07	-0.06	1000000000000	'chr3R:10152746:10152849:+@chr3R:10152975:10153473:+.A.withRI','chr3R:10152746:10152849:+@chr3R:10152975:10153473:+.B.up_chr3R:10152746:10152849:+@chr3R:10152975:10153473:+.B.dn'	(0,0):211,(0,1):1275,(1,0):45,(1,1):5637	0:111,1:6846	(0,0):382,(0,1):2286,(1,0):399,(1,1):9173	0:990,1:10868	chr3R	+	1015274610152740	1015347310153470
256	ND-MNLL	chrX:7787688:7787837:-@chrX:7787086:7787523:-	ri	0.06	0.04	0.08	0.12	0.11	0.14	-0.06	3.07511e+08	'chrX:7787688:7787837:-@chrX:7787086:7787523:-.A.withRI','chrX:7787688:7787837:-@chrX:7787086:7787523:-.B.dn_chrX:7787688:7787837:-@chrX:7787086:7787523:-.B.up'	(0,0):602,(0,1):7,(1,0):55,(1,1):2250	0:215,1:2097	(0,0):1200,(0,1):26,(1,0):200,(1,1):3718	0:654,1:3290	chrX	-	77870867787086	77878377787837
257	Lsd-1	chr3R:19591598:19591788:+@chr3R:19591852:19592029:+	ri	0	0	0.01	0.06	0.05	0.08	-0.06	1000000000000	'chr3R:19591598:19591788:+@chr3R:19591852:19592029:+.A.withRI','chr3R:19591598:19591788:+@chr3R:19591852:19592029:+.B.up_chr3R:19591598:19591788:+@chr3R:19591852:19592029:+.B.dn'	(0,0):633,(0,1):540,(1,0):4,(1,1):795	0:9,1:1330	(0,0):448,(0,1):467,(1,0):75,(1,1):660	0:96,1:1106	chr3R	+	1959159819591590	1959202919592020
258	Hrb27C	chr2L:6924685:6925564:+@chr2L:6927981:6928092:+	ri	0.93	0.91	0.96	0.99	0.99	1	-0.06	3.36668e+08	'chr2L:6924685:6925564:+@chr2L:6927981:6928092:+.A.withRI','chr2L:6924685:6925564:+@chr2L:6927981:6928092:+.B.up_chr2L:6924685:6925564:+@chr2L:6927981:6928092:+.B.dn'	(0,0):831,(0,1):12,(1,0):10480,(1,1):3451	0:13723,1:220	(0,0):1881,(0,1):6,(1,0):17934,(1,1):4031	0:21946,1:25	chr2L	+	69246856924685	69280926928092
259	Ect4	chr3L:8095370:8095430:+@chr3L:8095993:8097918:+	ri	0.02	0.01	0.04	0.08	0.07	0.09	-0.06	1.68084e+06	'chr3L:8095370:8095430:+@chr3L:8095993:8097918:+.A.withRI','chr3L:8095370:8095430:+@chr3L:8095993:8097918:+.B.up_chr3L:8095370:8095430:+@chr3L:8095993:8097918:+.B.dn'	(0,0):131,(1,0):12,(1,1):1820	0:73,1:1759	(0,0):364,(1,0):122,(1,1):4948	0:479,1:4591	chr3L	+	80953708095370	80979188097918
260	CG8399	chr2R:11905233:11905306:+@chr2R:11909394:11909881:+	ri	0.02	0.01	0.03	0.08	0.07	0.09	-0.06	1000000000000	'chr2R:11905233:11905306:+@chr2R:11909394:11909881:+.A.withRI','chr2R:11905233:11905306:+@chr2R:11909394:11909881:+.B.up_chr2R:11905233:11905306:+@chr2R:11909394:11909881:+.B.dn'	(0,0):45,(0,1):3,(1,0):28,(1,1):124	0:28,1:127	(0,0):155,(0,1):20,(1,0):443,(1,1):451	0:483,1:431	chr2R	+	1190523311905230	1190988111909880
261	His4r	chr3R:10451547:10451563:+@chr3R:10451748:10451951:+	ri	0.02	0.02	0.02	0.08	0.06	0.1	-0.06	1000000000000	'chr3R:10451547:10451563:+@chr3R:10451748:10451951:+.A.withRI','chr3R:10451547:10451563:+@chr3R:10451748:10451951:+.B.up_chr3R:10451547:10451563:+@chr3R:10451748:10451951:+.B.dn'	(0,0):3230,(0,1):9,(1,0):105,(1,1):1751	0:136,1:1729	(0,0):1280,(0,1):7,(1,0):97,(1,1):384	0:133,1:355	chr3R	+	1045154710451540	1045195110451950
262	AdipoR	chr3R:18372434:18372845:-@chr3R:18371407:18371505:-	ri	0.01	0.01	0.02	0.07	0.06	0.08	-0.06	1000000000000	'chr3R:18372434:18372845:-@chr3R:18371407:18371505:-.A.withRI','chr3R:18372434:18372845:-@chr3R:18371407:18371505:-.B.dn_chr3R:18372434:18372845:-@chr3R:18371407:18371505:-.B.up'	(0,0):361,(0,1):396,(1,0):37,(1,1):494	0:39,1:888	(0,0):376,(0,1):523,(1,0):262,(1,1):451	0:292,1:944	chr3R	-	1837140718371400	1837284518372840
263	Gs1	chr2L:132060:132255:+@chr2L:132476:133995:+	ri	0.03	0.02	0.03	0.08	0.07	0.09	-0.05	1000000000000	'chr2L:132060:132255:+@chr2L:132476:133995:+.A.withRI','chr2L:132060:132255:+@chr2L:132476:133995:+.B.up_chr2L:132060:132255:+@chr2L:132476:133995:+.B.dn'	(0,0):575,(0,1):2004,(1,0):122,(1,1):12907	0:473,1:14560	(0,0):474,(0,1):2271,(1,0):383,(1,1):13286	0:1362,1:14578	chr2L	+	132060132060	133995133995
264	CG9914	chrX:16202271:16202810:-@chrX:16201823:16202201:-	ri	0.01	0.01	0.01	0.06	0.05	0.07	-0.05	1000000000000	'chrX:16202271:16202810:-@chrX:16201823:16202201:-.A.withRI','chrX:16202271:16202810:-@chrX:16201823:16202201:-.B.dn_chrX:16202271:16202810:-@chrX:16201823:16202201:-.B.up'	(0,0):1161,(0,1):1677,(1,0):31,(1,1):6640	0:96,1:8252	(0,0):2845,(0,1):968,(1,0):121,(1,1):7907	0:557,1:8439	chrX	-	1620182316201820	1620281016202810
265	NTPase	chr2L:2882692:2882833:-@chr2L:2881382:2882511:-	ri	0.02	0.02	0.03	0.07	0.06	0.09	-0.05	6.50889e+11	'chr2L:2882692:2882833:-@chr2L:2881382:2882511:-.A.withRI','chr2L:2882692:2882833:-@chr2L:2881382:2882511:-.B.dn_chr2L:2882692:2882833:-@chr2L:2881382:2882511:-.B.up'	(0,0):505,(0,1):470,(1,0):30,(1,1):3907	0:99,1:4308	(0,0):404,(0,1):338,(1,0):73,(1,1):3225	0:302,1:3334	chr2L	-	28813822881382	28828332882833
266	ATPsynE	chr3R:10152746:10152905|10152810:+@chr3R:10152975:10153473:+	a5ss	0.14	0.12	0.16	0.19	0.17	0.21	-0.05	1086.68	'chr3R:10152746:10152905|10152810:+@chr3R:10152975:10153473:+.A.coreAndExt_chr3R:10152746:10152905|10152810:+@chr3R:10152975:10153473:+.A.dn','chr3R:10152746:10152905|10152810:+@chr3R:10152975:10153473:+.B.core_chr3R:10152746:10152905|10152810:+@chr3R:10152975:10153473:+.B.dn'	(0,0):1384,(0,1):3,(1,0):196,(1,1):5585	0:1001,1:4783	(0,0):2704,(1,0):446,(1,1):9090	0:1977,1:7559	chr3R	+	1015274610152740	1015347310153470
267	Eip63E	chr3L:3600312:3600491:+@chr3L:3607502:3607677:+	ri	0.94	0.92	0.95	0.99	0.99	0.99	-0.05	1000000000000	'chr3L:3600312:3600491:+@chr3L:3607502:3607677:+.A.withRI','chr3L:3600312:3600491:+@chr3L:3607502:3607677:+.B.up_chr3L:3600312:3600491:+@chr3L:3607502:3607677:+.B.dn'	(0,0):1006,(0,1):55,(1,0):38318,(1,1):29	0:38345,1:57	(0,0):7546,(0,1):82,(1,0):453662,(1,1):39	0:453700,1:83	chr3L	+	36003123600312	36076773607677
268	Eip63E	chr3L:3600312:3607166|3600491:+@chr3L:3607502:3607677:+	a5ss	0.94	0.92	0.95	0.99	0.99	0.99	-0.05	1000000000000	'chr3L:3600312:3607166|3600491:+@chr3L:3607502:3607677:+.A.coreAndExt_chr3L:3600312:3607166|3600491:+@chr3L:3607502:3607677:+.A.dn','chr3L:3600312:3607166|3600491:+@chr3L:3607502:3607677:+.B.core_chr3L:3600312:3607166|3600491:+@chr3L:3607502:3607677:+.B.dn'	(0,0):1008,(0,1):55,(1,0):38316,(1,1):29	0:38345,1:55	(0,0):7548,(0,1):82,(1,0):453660,(1,1):39	0:453697,1:84	chr3L	+	36003123600312	36076773607677
269	Eip63E	chr3L:3600312:3607304|3600491:+@chr3L:3607502:3607677:+	a5ss	0.94	0.92	0.95	0.99	0.99	0.99	-0.05	1000000000000	'chr3L:3600312:3607304|3600491:+@chr3L:3607502:3607677:+.A.coreAndExt_chr3L:3600312:3607304|3600491:+@chr3L:3607502:3607677:+.A.dn','chr3L:3600312:3607304|3600491:+@chr3L:3607502:3607677:+.B.core_chr3L:3600312:3607304|3600491:+@chr3L:3607502:3607677:+.B.dn'	(0,0):1008,(0,1):55,(1,0):38316,(1,1):29	0:38344,1:56	(0,0):7548,(0,1):82,(1,0):453660,(1,1):39	0:453699,1:82	chr3L	+	36003123600312	36076773607677
270	Eip63E	chr3L:3600312:3607396|3600491:+@chr3L:3607502:3607677:+	a5ss	0.94	0.92	0.95	0.99	0.99	0.99	-0.05	1000000000000	'chr3L:3600312:3607396|3600491:+@chr3L:3607502:3607677:+.A.coreAndExt_chr3L:3600312:3607396|3600491:+@chr3L:3607502:3607677:+.A.dn','chr3L:3600312:3607396|3600491:+@chr3L:3607502:3607677:+.B.core_chr3L:3600312:3607396|3600491:+@chr3L:3607502:3607677:+.B.dn'	(0,0):1006,(0,1):55,(1,0):38318,(1,1):29	0:38343,1:59	(0,0):7548,(0,1):82,(1,0):453660,(1,1):39	0:453698,1:83	chr3L	+	36003123600312	36076773607677
271	CG9331	chr2L:20824450:20824493:+@chr2L:20825272:20825512:+@chr2L:20825668:20826087:+	se	0.05	0.04	0.06	0.1	0.09	0.11	-0.05	1000000000000	'chr2L:20824450:20824493:+@chr2L:20825272:20825512:+@chr2L:20825668:20826087:+.A.up_chr2L:20824450:20824493:+@chr2L:20825272:20825512:+@chr2L:20825668:20826087:+.A.se_chr2L:20824450:20824493:+@chr2L:20825272:20825512:+@chr2L:20825668:20826087:+.A.dn','chr2L:20824450:20824493:+@chr2L:20825272:20825512:+@chr2L:20825668:20826087:+.B.up_chr2L:20824450:20824493:+@chr2L:20825272:20825512:+@chr2L:208256…	(0,0):1652,(0,1):312,(1,0):142,(1,1):2330	0:257,1:2527	(0,0):4072,(0,1):347,(1,0):343,(1,1):3125	0:610,1:3205	chr2L	+	2082445020824450	2082608720826080
272	Trp1	chr2L:10009916:10009983:+@chr2L:10010737:10011552:+	ri	0.04	0.03	0.05	0.09	0.08	0.1	-0.05	1000000000000	'chr2L:10009916:10009983:+@chr2L:10010737:10011552:+.A.withRI','chr2L:10009916:10009983:+@chr2L:10010737:10011552:+.B.up_chr2L:10009916:10009983:+@chr2L:10010737:10011552:+.B.dn'	(0,0):392,(1,0):84,(1,1):2093	0:150,1:2027	(0,0):705,(1,0):287,(1,1):2916	0:542,1:2661	chr2L	+	1000991610009910	1001155210011550
273	CG2233	chrX:7930933:7931245:-@chrX:7930759:7930835:-@chrX:7930253:7930603:-	se	0.94	0.93	0.95	0.99	0.97	1	-0.05	40.29	'chrX:7930933:7931245:-@chrX:7930759:7930835:-@chrX:7930253:7930603:-.A.dn_chrX:7930933:7931245:-@chrX:7930759:7930835:-@chrX:7930253:7930603:-.A.se_chrX:7930933:7931245:-@chrX:7930759:7930835:-@chrX:7930253:7930603:-.A.up','chrX:7930933:7931245:-@chrX:7930759:7930835:-@chrX:7930253:7930603:-.B.dn_chrX:7930933:7931245:-@chrX:7930759:7930835:-@chrX:7930253:7930603:-.B.up'	(0,0):13187,(0,1):45,(1,0):4092,(1,1):12402	0:15741,1:798	(0,0):773,(0,1):1,(1,0):445,(1,1):738	0:1175,1:9	chrX	-	79302537930253	79312457931245
274	CG8399	chr2R:11905233:11905362:+@chr2R:11909394:11909881:+	ri	0.02	0.01	0.02	0.07	0.06	0.08	-0.05	1000000000000	'chr2R:11905233:11905362:+@chr2R:11909394:11909881:+.A.withRI','chr2R:11905233:11905362:+@chr2R:11909394:11909881:+.B.up_chr2R:11905233:11905362:+@chr2R:11909394:11909881:+.B.dn'	(0,0):9,(0,1):39,(1,0):25,(1,1):127	0:25,1:166	(0,0):53,(0,1):122,(1,0):409,(1,1):485	0:434,1:582	chr2R	+	1190523311905230	1190988111909880
275	RpL22	chrX:657474:657827:-@chrX:656648:657024:-	ri	0.04	0.04	0.05	0.08	0.07	0.09	-0.04	1000000000000	'chrX:657474:657827:-@chrX:656648:657024:-.A.withRI','chrX:657474:657827:-@chrX:656648:657024:-.B.dn_chrX:657474:657827:-@chrX:656648:657024:-.B.up'	(0,0):3432,(0,1):378,(1,0):286,(1,1):6731	0:591,1:6804	(0,0):5391,(0,1):297,(1,0):675,(1,1):9288	0:1477,1:8783	chrX	-	656648656648	657827657827
276	Mlp84B, Alh	chr3R:2942374:2942645:-@chr3R:2939249:2941560:-	ri	0	0	0.01	0.04	0.03	0.04	-0.04	1000000000000	'chr3R:2942374:2942645:-@chr3R:2939249:2941560:-.A.withRI','chr3R:2942374:2942645:-@chr3R:2939249:2941560:-.B.dn_chr3R:2942374:2942645:-@chr3R:2939249:2941560:-.B.up'	(0,0):450,(0,1):46,(1,0):13,(1,1):9726	0:51,1:9734	(0,0):736,(0,1):201,(1,0):195,(1,1):15067	0:807,1:14656	chr3R	-	29392492939249	29426452942645
277	CG4019	chr2R:19496937:19497098:-@chr2R:19495655:19496204:-	ri	0.02	0.02	0.03	0.06	0.06	0.07	-0.04	1000000000000	'chr2R:19496937:19497098:-@chr2R:19495655:19496204:-.A.withRI','chr2R:19496937:19497098:-@chr2R:19495655:19496204:-.B.dn_chr2R:19496937:19497098:-@chr2R:19495655:19496204:-.B.up'	(0,0):588,(0,1):124,(1,0):82,(1,1):2125	0:132,1:2199	(0,0):925,(0,1):184,(1,0):388,(1,1):3941	0:630,1:3883	chr2R	-	1949565519495650	1949709819497090
278	toc	chr2L:3080651:3080887:-@chr2L:3071569:3071764:-	ri	0.96	0.95	0.97	1	0.99	1	-0.04	1000000000000	'chr2L:3080651:3080887:-@chr2L:3071569:3071764:-.A.withRI','chr2L:3080651:3080887:-@chr2L:3071569:3071764:-.B.dn_chr2L:3080651:3080887:-@chr2L:3071569:3071764:-.B.up'	(0,0):1131,(0,1):44,(1,0):41755,(1,1):33	0:41787,1:45	(0,0):7912,(0,1):52,(1,0):511785,(1,1):22	0:511807,1:52	chr2L	-	30715693071569	30808873080887
279	RpS26	chr2L:18443153:18443200:-@chr2L:18442505:18443073:-	ri	0	0	0	0.04	0.03	0.04	-0.04	1000000000000	'chr2L:18443153:18443200:-@chr2L:18442505:18443073:-.A.withRI','chr2L:18443153:18443200:-@chr2L:18442505:18443073:-.B.dn_chr2L:18443153:18443200:-@chr2L:18442505:18443073:-.B.up'	(0,0):13805,(0,1):131,(1,0):17,(1,1):32965	0:107,1:33006	(0,0):11429,(0,1):87,(1,0):264,(1,1):36893	0:1758,1:35486	chr2L	-	1844250518442500	1844320018443200
280	cact	chr2L:16325494:16325740:-@chr2L:16324333:16325054:-	ri	0.02	0.01	0.03	0.06	0.05	0.07	-0.04	5.42891e+06	'chr2L:16325494:16325740:-@chr2L:16324333:16325054:-.A.withRI','chr2L:16325494:16325740:-@chr2L:16324333:16325054:-.B.dn_chr2L:16325494:16325740:-@chr2L:16324333:16325054:-.B.up'	(0,0):44,(0,1):166,(1,0):10,(1,1):771	0:24,1:923	(0,0):110,(0,1):501,(1,0):113,(1,1):1943	0:236,1:2321	chr2L	-	1632433316324330	1632574016325740
281	Hrb27C	chr2L:6924685:6925558:+@chr2L:6927981:6928092:+	ri	0.96	0.93	0.98	1	0.99	1	-0.04	25.1	'chr2L:6924685:6925558:+@chr2L:6927981:6928092:+.A.withRI','chr2L:6924685:6925558:+@chr2L:6927981:6928092:+.B.up_chr2L:6924685:6925558:+@chr2L:6927981:6928092:+.B.dn'	(0,0):837,(0,1):6,(1,0):10543,(1,1):3388	0:13716,1:221	(0,0):1881,(0,1):6,(1,0):18064,(1,1):3901	0:21955,1:16	chr2L	+	69246856924685	69280926928092
282	Fim	chrX:17189086:17189491:-@chrX:17181960:17183070:-	ri	0.04	0.04	0.05	0.08	0.08	0.09	-0.04	1000000000000	'chrX:17189086:17189491:-@chrX:17181960:17183070:-.A.withRI','chrX:17189086:17189491:-@chrX:17181960:17183070:-.B.dn_chrX:17189086:17189491:-@chrX:17181960:17183070:-.B.up'	(0,0):508,(1,0):380,(1,1):2035	0:445,1:1970	(0,0):908,(1,0):1054,(1,1):2763	0:1280,1:2537	chrX	-	1718196017181960	1718949117189490
283	Rfabg	chr4:1093787:1094007:+@chr4:1094065:1096183:+	ri	0.01	0.01	0.01	0.05	0.04	0.05	-0.04	1000000000000	'chr4:1093787:1094007:+@chr4:1094065:1096183:+.A.withRI','chr4:1093787:1094007:+@chr4:1094065:1096183:+.B.up_chr4:1093787:1094007:+@chr4:1094065:1096183:+.B.dn'	(0,0):5164,(0,1):3020,(1,0):56,(1,1):87448	0:935,1:89589	(0,0):5731,(0,1):4070,(1,0):398,(1,1):104836	0:5245,1:104059	chr4	+	10937871093787	10961831096183
284	Zasp66	chr3L:8623370:8623476:+@chr3L:8623617:8623735:+	ri	0.04	0.03	0.04	0.07	0.06	0.07	-0.03	135986	'chr3L:8623370:8623476:+@chr3L:8623617:8623735:+.A.withRI','chr3L:8623370:8623476:+@chr3L:8623617:8623735:+.B.up_chr3L:8623370:8623476:+@chr3L:8623617:8623735:+.B.dn'	(0,0):970,(0,1):415,(1,0):84,(1,1):314	0:88,1:725	(0,0):2190,(0,1):945,(1,0):375,(1,1):810	0:392,1:1738	chr3L	+	86233708623370	86237358623735
285	scaf	chr2R:1579157:1579226:-@chr2R:1575181:1575543:-	ri	0.01	0.01	0.02	0.04	0.04	0.05	-0.03	8.81909e+06	'chr2R:1579157:1579226:-@chr2R:1575181:1575543:-.A.withRI','chr2R:1579157:1579226:-@chr2R:1575181:1575543:-.B.dn_chr2R:1579157:1579226:-@chr2R:1575181:1575543:-.B.up'	(0,0):9,(0,1):17,(1,0):12,(1,1):54	0:12,1:71	(0,0):189,(0,1):187,(1,0):395,(1,1):413	0:414,1:581	chr2R	-	15751811575181	15792261579226
286	CG2082, jagn	chr3R:1605005:1605238:+@chr3R:1605522:1605894:+	ri	0.01	0	0.02	0.04	0.03	0.06	-0.03	328492	'chr3R:1605005:1605238:+@chr3R:1605522:1605894:+.A.withRI','chr3R:1605005:1605238:+@chr3R:1605522:1605894:+.B.up_chr3R:1605005:1605238:+@chr3R:1605522:1605894:+.B.dn'	(0,0):62,(0,1):323,(1,0):6,(1,1):339	0:8,1:660	(0,0):28,(0,1):261,(1,0):26,(1,1):250	0:34,1:503	chr3R	+	16050051605005	16058941605894
287	ChAT, CG7714	chr3R:14552065:14552368:-@chr3R:14551076:14551981:-	ri	0.01	0.01	0.01	0.04	0.03	0.04	-0.03	1000000000000	'chr3R:14552065:14552368:-@chr3R:14551076:14551981:-.A.withRI','chr3R:14552065:14552368:-@chr3R:14551076:14551981:-.B.dn_chr3R:14552065:14552368:-@chr3R:14551076:14551981:-.B.up'	(0,0):277,(0,1):1104,(1,0):24,(1,1):11313	0:127,1:12314	(0,0):813,(0,1):2691,(1,0):216,(1,1):21805	0:1002,1:23710	chr3R	-	1455107614551070	1455236814552360
288	RpL15	chr3LHet:2398050:2398059:+@chr3LHet:2398128:2398454:+	ri	0.07	0.06	0.07	0.1	0.09	0.1	-0.03	1000000000000	'chr3LHet:2398050:2398059:+@chr3LHet:2398128:2398454:+.A.withRI','chr3LHet:2398050:2398059:+@chr3LHet:2398128:2398454:+.B.up_chr3LHet:2398050:2398059:+@chr3LHet:2398128:2398454:+.B.dn'	(0,0):4159,(1,0):759,(1,1):22825	0:2390,1:21194	(0,0):3428,(1,0):1404,(1,1):29663	0:4313,1:26754	chr3LHet	+	23980502398050	23984542398454
289	ATPsynE	chr3R:10152746:10152910|10152810:+@chr3R:10152975:10153473:+	a5ss	0.08	0.06	0.09	0.11	0.1	0.13	-0.03	16.39	'chr3R:10152746:10152910|10152810:+@chr3R:10152975:10153473:+.A.coreAndExt_chr3R:10152746:10152910|10152810:+@chr3R:10152975:10153473:+.A.dn','chr3R:10152746:10152910|10152810:+@chr3R:10152975:10153473:+.B.core_chr3R:10152746:10152910|10152810:+@chr3R:10152975:10153473:+.B.dn'	(0,0):1464,(0,1):3,(1,0):116,(1,1):5585	0:488,1:5216	(0,0):2867,(1,0):283,(1,1):9090	0:1360,1:8013	chr3R	+	1015274610152740	1015347310153470
290	zetaCOP	chr3L:16665554:16665644:-@chr3L:16664764:16664942:-	ri	0.02	0.01	0.02	0.05	0.04	0.06	-0.03	1000000000000	'chr3L:16665554:16665644:-@chr3L:16664764:16664942:-.A.withRI','chr3L:16665554:16665644:-@chr3L:16664764:16664942:-.B.dn_chr3L:16665554:16665644:-@chr3L:16664764:16664942:-.B.up'	(0,0):269,(0,1):367,(1,0):67,(1,1):82	0:68,1:448	(0,0):168,(0,1):237,(1,0):132,(1,1):88	0:137,1:320	chr3L	-	1666476416664760	1666564416665640
291	Ect4	chr3L:8093067:8093135:+@chr3L:8095993:8097918:+	ri	0.02	0.02	0.03	0.05	0.05	0.06	-0.03	1000000000000	'chr3L:8093067:8093135:+@chr3L:8095993:8097918:+.A.withRI','chr3L:8093067:8093135:+@chr3L:8095993:8097918:+.B.up_chr3L:8093067:8093135:+@chr3L:8095993:8097918:+.B.dn'	(0,0):134,(1,0):71,(1,1):1820	0:126,1:1765	(0,0):370,(1,0):419,(1,1):4948	0:672,1:4695	chr3L	+	80930678093067	80979188097918
292	RpS14a	chrX:7827747:7827879:+@chrX:7828042:7828303:+	ri	0.01	0.01	0.01	0.04	0.04	0.05	-0.03	1000000000000	'chrX:7827747:7827879:+@chrX:7828042:7828303:+.A.withRI','chrX:7827747:7827879:+@chrX:7828042:7828303:+.B.up_chrX:7827747:7827879:+@chrX:7828042:7828303:+.B.dn'	(0,0):7574,(0,1):6,(1,0):64,(1,1):9218	0:149,1:9139	(0,0):3743,(0,1):3,(1,0):188,(1,1):5120	0:419,1:4892	chrX	+	78277477827747	78283037828303
293	CG11652	chr3L:11689975:11690086:-@chr3L:11687910:11688678:-	ri	0.02	0.01	0.02	0.05	0.04	0.06	-0.03	4.8546e+09	'chr3L:11689975:11690086:-@chr3L:11687910:11688678:-.A.withRI','chr3L:11689975:11690086:-@chr3L:11687910:11688678:-.B.dn_chr3L:11689975:11690086:-@chr3L:11687910:11688678:-.B.up'	(0,0):271,(0,1):143,(1,0):57,(1,1):1376	0:85,1:1491	(0,0):229,(0,1):108,(1,0):89,(1,1):729	0:134,1:792	chr3L	-	1168791011687910	1169008611690080
294	CG3209	chr2R:19957523:19957765:+@chr2R:19958291:19958291:+@chr2R:19959518:19959518:+@chr2R:19960228:19960484:+	mxe	0.93	0.91	0.94	0.96	0.95	0.97	-0.03	144451	'chr2R:19957523:19957765:+@chr2R:19958291:19958291:+@chr2R:19959518:19959518:+@chr2R:19960228:19960484:+.A.up_chr2R:19957523:19957765:+@chr2R:19958291:19958291:+@chr2R:19959518:19959518:+@chr2R:19960228:19960484:+.A.mxe1_chr2R:19957523:19957765:+@chr2R:19958291:19958291:+@chr2R:19959518:19959518:+@chr2R:19960228:19960484:+.A.dn','chr2R:19957523:19957765:+@chr2R:19958291:19958291:+@chr2R:19959518:…	(0,0):781,(0,1):125,(1,0):1606,(1,1):1086	0:2642,1:175	(0,0):860,(0,1):58,(1,0):1550,(1,1):694	0:2217,1:85	chr2R	+	1995752319957520	1996048419960480
295	CG42336	chr2R:7182999:7183348:-@chr2R:7182047:7182290:-	ri	0.06	0.05	0.07	0.09	0.09	0.1	-0.03	1000000000000	'chr2R:7182999:7183348:-@chr2R:7182047:7182290:-.A.withRI','chr2R:7182999:7183348:-@chr2R:7182047:7182290:-.B.dn_chr2R:7182999:7183348:-@chr2R:7182047:7182290:-.B.up'	(0,0):1151,(0,1):986,(1,0):445,(1,1):2568	0:570,1:3429	(0,0):787,(0,1):817,(1,0):573,(1,1):2003	0:746,1:2647	chr2R	-	71820477182047	71833487183348
296	CG5773	chr2R:13931019:13931311:-@chr2R:13930409:13930926:-	ri	0.01	0	0.01	0.04	0.03	0.05	-0.03	1000000000000	'chr2R:13931019:13931311:-@chr2R:13930409:13930926:-.A.withRI','chr2R:13931019:13931311:-@chr2R:13930409:13930926:-.B.dn_chr2R:13931019:13931311:-@chr2R:13930409:13930926:-.B.up'	(0,0):354,(0,1):2124,(1,0):33,(1,1):7205	0:61,1:9301	(0,0):48,(0,1):567,(1,0):61,(1,1):3480	0:170,1:3938	chr2R	-	1393040913930400	1393131113931310
297	fbp	chr2L:19763426:19763485:-@chr2L:19762488:19762814:-	ri	0.03	0.03	0.04	0.06	0.05	0.06	-0.03	510.88	'chr2L:19763426:19763485:-@chr2L:19762488:19762814:-.A.withRI','chr2L:19763426:19763485:-@chr2L:19762488:19762814:-.B.dn_chr2L:19763426:19763485:-@chr2L:19762488:19762814:-.B.up'	(0,0):945,(0,1):5,(1,0):114,(1,1):1074	0:156,1:1037	(0,0):1512,(0,1):3,(1,0):233,(1,1):1274	0:314,1:1196	chr2L	-	1976248819762480	1976348519763480
298	Atpalpha	chr3R:16783486:16783889:+@chr3R:16786448:16786547:+	ri	0	0	0.01	0.03	0.02	0.03	-0.03	1000000000000	'chr3R:16783486:16783889:+@chr3R:16786448:16786547:+.A.withRI','chr3R:16783486:16783889:+@chr3R:16786448:16786547:+.B.up_chr3R:16783486:16783889:+@chr3R:16786448:16786547:+.B.dn'	(0,0):260,(0,1):10,(1,0):14,(1,1):445	0:15,1:454	(0,0):888,(0,1):37,(1,0):142,(1,1):603	0:159,1:623	chr3R	+	1678348616783480	1678654716786540
299	Mlp84B, Alh	chr3R:2943373:2943496:-@chr3R:2939249:2941560:-	ri	0.01	0	0.01	0.04	0.03	0.04	-0.03	1000000000000	'chr3R:2943373:2943496:-@chr3R:2939249:2941560:-.A.withRI','chr3R:2943373:2943496:-@chr3R:2939249:2941560:-.B.dn_chr3R:2943373:2943496:-@chr3R:2939249:2941560:-.B.up'	(0,0):344,(0,1):407,(1,0):44,(1,1):9727	0:88,1:10090	(0,0):668,(0,1):942,(1,0):496,(1,1):15048	0:994,1:15492	chr3R	-	29392492939249	29434962943496
300	RpL15	chr3LHet:2397802:2397840:+@chr3LHet:2398128:2398454:+	ri	0.02	0.02	0.03	0.05	0.04	0.05	-0.03	1000000000000	'chr3LHet:2397802:2397840:+@chr3LHet:2398128:2398454:+.A.withRI','chr3LHet:2397802:2397840:+@chr3LHet:2398128:2398454:+.B.up_chr3LHet:2397802:2397840:+@chr3LHet:2398128:2398454:+.B.dn'	(0,0):4188,(1,0):969,(1,1):22825	0:1571,1:22223	(0,0):3209,(0,1):8,(1,0):2347,(1,1):29663	0:3756,1:28262	chr3LHet	+	23978022397802	23984542398454
301	Actn	chrX:1936080:1936304:-@chrX:1924476:1924892:-	ri	0.09	0.08	0.1	0.12	0.11	0.13	-0.03	6.55567e+08	'chrX:1936080:1936304:-@chrX:1924476:1924892:-.A.withRI','chrX:1936080:1936304:-@chrX:1924476:1924892:-.B.dn_chrX:1936080:1936304:-@chrX:1924476:1924892:-.B.up'	(0,0):695,(1,0):1460,(1,1):654	0:1516,1:598	(0,0):2119,(0,1):5,(1,0):2791,(1,1):913	0:2898,1:811	chrX	-	19244761924476	19363041936304
302	Hel25E	chr2L:5540972:5541090:-@chr2L:5540169:5540300:-	ri	0.04	0.03	0.05	0.07	0.06	0.08	-0.03	2146.79	'chr2L:5540972:5541090:-@chr2L:5540169:5540300:-.A.withRI','chr2L:5540972:5541090:-@chr2L:5540169:5540300:-.B.dn_chr2L:5540972:5541090:-@chr2L:5540169:5540300:-.B.up'	(0,0):388,(0,1):266,(1,0):123,(1,1):21	0:124,1:286	(0,0):261,(0,1):276,(1,0):235,(1,1):14	0:235,1:290	chr2L	-	55401695540169	55410905541090
303	Argk	chr3L:9057564:9057617:-@chr3L:9055007:9055567:-@chr3L:9043148:9043459:-	se	0.02	0.02	0.02	0.05	0.05	0.05	-0.03	1000000000000	'chr3L:9057564:9057617:-@chr3L:9055007:9055567:-@chr3L:9043148:9043459:-.A.dn_chr3L:9057564:9057617:-@chr3L:9055007:9055567:-@chr3L:9043148:9043459:-.A.se_chr3L:9057564:9057617:-@chr3L:9055007:9055567:-@chr3L:9043148:9043459:-.A.up','chr3L:9057564:9057617:-@chr3L:9055007:9055567:-@chr3L:9043148:9043459:-.B.dn_chr3L:9057564:9057617:-@chr3L:9055007:9055567:-@chr3L:9043148:9043459:-.B.up'	(0,0):12047,(0,1):5,(1,0):857,(1,1):12958	0:1072,1:12748	(0,0):16439,(0,1):12,(1,0):2100,(1,1):12882	0:2707,1:12287	chr3L	-	90431489043148	90576179057617
304	Atpalpha	chr3R:16783486:16783889:+@chr3R:16787937:16788017:+	ri	0	0	0.01	0.03	0.02	0.03	-0.03	1000000000000	'chr3R:16783486:16783889:+@chr3R:16787937:16788017:+.A.withRI','chr3R:16783486:16783889:+@chr3R:16787937:16788017:+.B.up_chr3R:16783486:16783889:+@chr3R:16787937:16788017:+.B.dn'	(0,0):349,(0,1):1,(1,0):22,(1,1):445	0:23,1:445	(0,0):1002,(0,1):2,(1,0):235,(1,1):602	0:254,1:585	chr3R	+	1678348616783480	1678801716788010
305	Atpalpha	chr3R:16783486:16783889:+@chr3R:16784959:16785012:+	ri	0	0	0.01	0.03	0.02	0.03	-0.03	1000000000000	'chr3R:16783486:16783889:+@chr3R:16784959:16785012:+.A.withRI','chr3R:16783486:16783889:+@chr3R:16784959:16785012:+.B.up_chr3R:16783486:16783889:+@chr3R:16784959:16785012:+.B.dn'	(0,0):216,(0,1):8,(1,0):5,(1,1):445	0:9,1:449	(0,0):775,(0,1):14,(1,0):64,(1,1):602	0:88,1:592	chr3R	+	1678348616783480	1678501216785010
306	hts	chr2R:15312328:15312395:-@chr2R:15311099:15311302:-	ri	0.01	0.01	0.02	0.04	0.03	0.05	-0.03	1000000000000	'chr2R:15312328:15312395:-@chr2R:15311099:15311302:-.A.withRI','chr2R:15312328:15312395:-@chr2R:15311099:15311302:-.B.dn_chr2R:15312328:15312395:-@chr2R:15311099:15311302:-.B.up'	(0,0):88,(0,1):92,(1,0):22,(1,1):76	0:24,1:166	(0,0):267,(0,1):124,(1,0):96,(1,1):64	0:98,1:186	chr2R	-	1531109915311090	1531239515312390
307	PRL-1	chr2L:16248768:16248602|16247504:-@chr2L:16247253:16247384:-	a5ss	0.01	0.01	0.02	0.04	0.04	0.05	-0.03	1000000000000	'chr2L:16248768:16248602|16247504:-@chr2L:16247253:16247384:-.A.dn_chr2L:16248768:16248602|16247504:-@chr2L:16247253:16247384:-.A.coreAndExt','chr2L:16248768:16248602|16247504:-@chr2L:16247253:16247384:-.B.dn_chr2L:16248768:16248602|16247504:-@chr2L:16247253:16247384:-.B.core'	(0,0):346,(0,1):246,(1,0):49,(1,1):62	0:49,1:308	(0,0):502,(0,1):195,(1,0):116,(1,1):34	0:116,1:229	chr2L	-	1624725316247250	1624876816248760
308	His4r	chr3R:10451469:10451639|10451537:+@chr3R:10451748:10451951:+	a5ss	0.03	0.02	0.03	0.06	0.05	0.07	-0.03	1000000000000	'chr3R:10451469:10451639|10451537:+@chr3R:10451748:10451951:+.A.coreAndExt_chr3R:10451469:10451639|10451537:+@chr3R:10451748:10451951:+.A.dn','chr3R:10451469:10451639|10451537:+@chr3R:10451748:10451951:+.B.core_chr3R:10451469:10451639|10451537:+@chr3R:10451748:10451951:+.B.dn'	(0,0):1354,(0,1):1828,(1,0):166,(1,1):1771	0:214,1:3551	(0,0):399,(0,1):848,(1,0):147,(1,1):401	0:172,1:1224	chr3R	+	1045146910451460	1045195110451950
309	RpL15	chr3LHet:2398050:2398052:+@chr3LHet:2398128:2398454:+	ri	0.06	0.06	0.06	0.08	0.08	0.09	-0.02	1000000000000	'chr3LHet:2398050:2398052:+@chr3LHet:2398128:2398454:+.A.withRI','chr3LHet:2398050:2398052:+@chr3LHet:2398128:2398454:+.B.up_chr3LHet:2398050:2398052:+@chr3LHet:2398128:2398454:+.B.dn'	(0,0):4159,(1,0):759,(1,1):22825	0:2214,1:21370	(0,0):3428,(1,0):1404,(1,1):29663	0:3914,1:27153	chr3LHet	+	23980502398050	23984542398454
310	CG10737	chr2R:15052965:15053033:+@chr2R:15058123:15058666:+	ri	0	0	0.01	0.02	0.01	0.02	-0.02	1.29633e+11	'chr2R:15052965:15053033:+@chr2R:15058123:15058666:+.A.withRI','chr2R:15052965:15053033:+@chr2R:15058123:15058666:+.B.up_chr2R:15052965:15053033:+@chr2R:15058123:15058666:+.B.dn'	(0,0):70,(1,0):6,(1,1):187	0:6,1:187	(0,0):243,(0,1):3,(1,0):71,(1,1):353	0:73,1:354	chr2R	+	1505296515052960	1505866615058660
311	Roc2, Tret1-1	chr2R:7558535:7558685:+@chr2R:7560222:7560347:+	ri	0.01	0	0.01	0.03	0.02	0.04	-0.02	1000000000000	'chr2R:7558535:7558685:+@chr2R:7560222:7560347:+.A.withRI','chr2R:7558535:7558685:+@chr2R:7560222:7560347:+.B.up_chr2R:7558535:7558685:+@chr2R:7560222:7560347:+.B.dn'	(0,0):156,(0,1):169,(1,0):22,(1,1):27	0:22,1:196	(0,0):236,(0,1):172,(1,0):120,(1,1):45	0:123,1:214	chr2R	+	75585357558535	75603477560347
312	Ald	chr3R:22082655:22082854:-@chr3R:22080805:22081153:-	ri	0.14	0.14	0.15	0.16	0.15	0.17	-0.02	20.67	'chr3R:22082655:22082854:-@chr3R:22080805:22081153:-.A.withRI','chr3R:22082655:22082854:-@chr3R:22080805:22081153:-.B.dn_chr3R:22082655:22082854:-@chr3R:22080805:22081153:-.B.up'	(0,0):4658,(0,1):2018,(1,0):3776,(1,1):3211	0:4230,1:4775	(0,0):5639,(0,1):1880,(1,0):4700,(1,1):4074	0:5369,1:5285	chr3R	-	2208080522080800	2208285422082850
313	wdb	chr3R:23407716:23407937:-@chr3R:23394001:23394313:-	ri	0.01	0.01	0.02	0.03	0.02	0.03	-0.02	1000000000000	'chr3R:23407716:23407937:-@chr3R:23394001:23394313:-.A.withRI','chr3R:23407716:23407937:-@chr3R:23394001:23394313:-.B.dn_chr3R:23407716:23407937:-@chr3R:23394001:23394313:-.B.up'	(0,0):185,(0,1):33,(1,0):120,(1,1):199	0:123,1:229	(0,0):306,(0,1):34,(1,0):385,(1,1):302	0:390,1:331	chr3R	-	2339400123394000	2340793723407930
314	RpL15	chr3LHet:2397802:2397858:+@chr3LHet:2398128:2398454:+	ri	0.03	0.03	0.03	0.05	0.05	0.06	-0.02	1000000000000	'chr3LHet:2397802:2397858:+@chr3LHet:2398128:2398454:+.A.withRI','chr3LHet:2397802:2397858:+@chr3LHet:2398128:2398454:+.B.up_chr3LHet:2397802:2397858:+@chr3LHet:2398128:2398454:+.B.dn'	(0,0):4176,(0,1):12,(1,0):969,(1,1):22825	0:1624,1:22182	(0,0):3200,(0,1):17,(1,0):2347,(1,1):29663	0:3906,1:28121	chr3LHet	+	23978022397802	23984542398454
315	CG3566	chrX:6170261:6170329:-@chrX:6169003:6169203:-	ri	0.02	0.02	0.03	0.04	0.03	0.05	-0.02	64.15	'chrX:6170261:6170329:-@chrX:6169003:6169203:-.A.withRI','chrX:6170261:6170329:-@chrX:6169003:6169203:-.B.dn_chrX:6170261:6170329:-@chrX:6169003:6169203:-.B.up'	(0,0):163,(0,1):178,(1,0):82,(1,1):125	0:86,1:299	(0,0):119,(0,1):162,(1,0):142,(1,1):112	0:143,1:273	chrX	-	61690036169003	61703296170329
316	SPARC	chr3R:22697767:22697648|22697414:-@chr3R:22695915:22696094:-	a5ss	0	0	0	0.02	0.01	0.02	-0.02	1000000000000	'chr3R:22697767:22697648|22697414:-@chr3R:22695915:22696094:-.A.dn_chr3R:22697767:22697648|22697414:-@chr3R:22695915:22696094:-.A.coreAndExt','chr3R:22697767:22697648|22697414:-@chr3R:22695915:22696094:-.B.dn_chr3R:22697767:22697648|22697414:-@chr3R:22695915:22696094:-.B.core'	(0,0):697,(0,1):813,(1,0):4,(1,1):345	0:4,1:1158	(0,0):2221,(0,1):677,(1,0):49,(1,1):407	0:55,1:1078	chr3R	-	2269591522695910	2269776722697760
317	Mpcp	chr3L:14530782:14530934|14530802:+@chr3L:14531104:14531521:+	a5ss	0.02	0.01	0.02	0.04	0.04	0.05	-0.02	1000000000000	'chr3L:14530782:14530934|14530802:+@chr3L:14531104:14531521:+.A.coreAndExt_chr3L:14530782:14530934|14530802:+@chr3L:14531104:14531521:+.A.dn','chr3L:14530782:14530934|14530802:+@chr3L:14531104:14531521:+.B.core_chr3L:14530782:14530934|14530802:+@chr3L:14531104:14531521:+.B.dn'	(0,0):1721,(0,1):826,(1,0):57,(1,1):4257	0:120,1:5020	(0,0):2686,(0,1):1634,(1,0):226,(1,1):5095	0:422,1:6533	chr3L	+	1453078214530780	1453152114531520
318	ND-MNLL	chrX:7787837:7787783|7787621:-@chrX:7787086:7787449:-	a5ss	0.03	0.02	0.04	0.05	0.04	0.07	-0.02	105.12	'chrX:7787837:7787783|7787621:-@chrX:7787086:7787449:-.A.dn_chrX:7787837:7787783|7787621:-@chrX:7787086:7787449:-.A.coreAndExt','chrX:7787837:7787783|7787621:-@chrX:7787086:7787449:-.B.dn_chrX:7787837:7787783|7787621:-@chrX:7787086:7787449:-.B.core'	(0,0):1357,(0,1):69,(1,0):31,(1,1):1457	0:74,1:1483	(0,0):2419,(0,1):150,(1,0):114,(1,1):2461	0:276,1:2449	chrX	-	77870867787086	77878377787837
319	wal	chr2R:7578044:7578091:-@chr2R:7576305:7577393:-	ri	0.02	0.02	0.02	0.04	0.04	0.05	-0.02	1000000000000	'chr2R:7578044:7578091:-@chr2R:7576305:7577393:-.A.withRI','chr2R:7578044:7578091:-@chr2R:7576305:7577393:-.B.dn_chr2R:7578044:7578091:-@chr2R:7576305:7577393:-.B.up'	(0,0):2296,(1,0):114,(1,1):8218	0:259,1:8073	(0,0):2868,(1,0):321,(1,1):10434	0:746,1:10009	chr2R	-	75763057576305	75780917578091
320	CG8468	chr2R:10107405:10107547:+@chr2R:10114916:10116800:+	ri	0.02	0.02	0.02	0.04	0.04	0.05	-0.02	1000000000000	'chr2R:10107405:10107547:+@chr2R:10114916:10116800:+.A.withRI','chr2R:10107405:10107547:+@chr2R:10114916:10116800:+.B.up_chr2R:10107405:10107547:+@chr2R:10114916:10116800:+.B.dn'	(0,0):797,(0,1):11,(1,0):282,(1,1):3296	0:360,1:3229	(0,0):1836,(0,1):47,(1,0):740,(1,1):4181	0:906,1:4062	chr2R	+	1010740510107400	1011680010116800
321	CG3808, CG18135	chr3L:18991101:18991383:-@chr3L:18983122:18985825:-	ri	0.05	0.04	0.05	0.07	0.06	0.07	-0.02	1000000000000	'chr3L:18991101:18991383:-@chr3L:18983122:18985825:-.A.withRI','chr3L:18991101:18991383:-@chr3L:18983122:18985825:-.B.dn_chr3L:18991101:18991383:-@chr3L:18983122:18985825:-.B.up'	(0,0):613,(0,1):37,(1,0):812,(1,1):9206	0:1312,1:8743	(0,0):457,(0,1):74,(1,0):1005,(1,1):7843	0:1522,1:7400	chr3L	-	1898312218983120	1899138318991380
322	CG1544	chr3R:27022639:27022857:+@chr3R:27024893:27025010:+	ri	0.01	0.01	0.01	0.03	0.02	0.04	-0.02	277.26	'chr3R:27022639:27022857:+@chr3R:27024893:27025010:+.A.withRI','chr3R:27022639:27022857:+@chr3R:27024893:27025010:+.B.up_chr3R:27022639:27022857:+@chr3R:27024893:27025010:+.B.dn'	(0,0):56,(0,1):133,(1,0):33,(1,1):79	0:33,1:212	(0,0):59,(0,1):129,(1,0):71,(1,1):32	0:71,1:161	chr3R	+	2702263927022630	2702501027025010
323	Atpalpha	chr3R:16783486:16783889:+@chr3R:16785071:16785102:+	ri	0	0	0.01	0.02	0.02	0.03	-0.02	1000000000000	'chr3R:16783486:16783889:+@chr3R:16785071:16785102:+.A.withRI','chr3R:16783486:16783889:+@chr3R:16785071:16785102:+.B.up_chr3R:16783486:16783889:+@chr3R:16785071:16785102:+.B.dn'	(0,0):235,(1,0):7,(1,1):445	0:10,1:442	(0,0):829,(1,0):69,(1,1):602	0:86,1:585	chr3R	+	1678348616783480	1678510216785100
324	Fer1HCH	chr3R:26213497:26213534:-@chr3R:26212041:26212318:-	ri	0.04	0.03	0.04	0.06	0.06	0.07	-0.02	1000000000000	'chr3R:26213497:26213534:-@chr3R:26212041:26212318:-.A.withRI','chr3R:26213497:26213534:-@chr3R:26212041:26212318:-.B.dn_chr3R:26213497:26213534:-@chr3R:26212041:26212318:-.B.up'	(0,0):18798,(0,1):2,(1,0):2978,(1,1):8569	0:3272,1:8277	(0,0):9920,(1,0):2687,(1,1):4219	0:2916,1:3990	chr3R	-	2621204126212040	2621353426213530
325	Gclc	chrX:8010025:8010154:-@chrX:7999301:7999927:-	ri	0.01	0.01	0.01	0.03	0.03	0.03	-0.02	1000000000000	'chrX:8010025:8010154:-@chrX:7999301:7999927:-.A.withRI','chrX:8010025:8010154:-@chrX:7999301:7999927:-.B.dn_chrX:8010025:8010154:-@chrX:7999301:7999927:-.B.up'	(0,0):325,(0,1):4,(1,0):119,(1,1):630	0:123,1:630	(0,0):760,(0,1):21,(1,0):502,(1,1):900	0:537,1:886	chrX	-	79993017999301	80101548010154
326	CG6891	chrX:18669142:18669662:+@chrX:18674714:18675037:+	ri	0	0	0	0.02	0.01	0.02	-0.02	1000000000000	'chrX:18669142:18669662:+@chrX:18674714:18675037:+.A.withRI','chrX:18669142:18669662:+@chrX:18674714:18675037:+.B.up_chrX:18669142:18669662:+@chrX:18674714:18675037:+.B.dn'	(0,0):637,(0,1):2177,(1,0):95,(1,1):6776	0:102,1:8946	(0,0):97,(0,1):279,(1,0):176,(1,1):999	0:193,1:1261	chrX	+	1866914218669140	1867503718675030
327	ND-MNLL	chrX:7787783:7787837:-@chrX:7787086:7787523:-	ri	0.02	0.02	0.03	0.04	0.04	0.05	-0.02	82092.5	'chrX:7787783:7787837:-@chrX:7787086:7787523:-.A.withRI','chrX:7787783:7787837:-@chrX:7787086:7787523:-.B.dn_chrX:7787783:7787837:-@chrX:7787086:7787523:-.B.up'	(0,0):178,(0,1):431,(1,0):62,(1,1):2243	0:103,1:2633	(0,0):332,(0,1):894,(1,0):214,(1,1):3704	0:371,1:4441	chrX	-	77870867787086	77878377787837
328	CG44245	chr2R:17089785:17089853:+@chr2R:17092118:17092428:+	ri	0.01	0.01	0.02	0.03	0.02	0.03	-0.02	5.47962e+08	'chr2R:17089785:17089853:+@chr2R:17092118:17092428:+.A.withRI','chr2R:17089785:17089853:+@chr2R:17092118:17092428:+.B.up_chr2R:17089785:17089853:+@chr2R:17092118:17092428:+.B.dn'	(0,0):146,(1,0):39,(1,1):266	0:44,1:261	(0,0):405,(1,0):200,(1,1):549	0:214,1:535	chr2R	+	1708978517089780	1709242817092420
329	Mpcp	chr3L:14530782:14530948|14530802:+@chr3L:14531104:14531521:+	a5ss	0.01	0.01	0.01	0.03	0.02	0.03	-0.02	1000000000000	'chr3L:14530782:14530948|14530802:+@chr3L:14531104:14531521:+.A.coreAndExt_chr3L:14530782:14530948|14530802:+@chr3L:14531104:14531521:+.A.dn','chr3L:14530782:14530948|14530802:+@chr3L:14531104:14531521:+.B.core_chr3L:14530782:14530948|14530802:+@chr3L:14531104:14531521:+.B.dn'	(0,0):1741,(0,1):826,(1,0):37,(1,1):4257	0:73,1:5047	(0,0):2749,(0,1):1634,(1,0):163,(1,1):5095	0:316,1:6576	chr3L	+	1453078214530780	1453152114531520
330	CG4019	chr2R:19501990:19502243:-@chr2R:19495655:19496204:-	ri	0.01	0.01	0.01	0.03	0.03	0.03	-0.02	1000000000000	'chr2R:19501990:19502243:-@chr2R:19495655:19496204:-.A.withRI','chr2R:19501990:19502243:-@chr2R:19495655:19496204:-.B.dn_chr2R:19501990:19502243:-@chr2R:19495655:19496204:-.B.up'	(0,0):716,(0,1):23,(1,0):155,(1,1):2126	0:171,1:2133	(0,0):1128,(0,1):107,(1,0):1092,(1,1):3950	0:1191,1:3958	chr2R	-	1949565519495650	1950224319502240
331	Idh	chr3L:8351950:8351963:-@chr3L:8349503:8351005:-	ri	0.01	0.01	0.02	0.03	0.03	0.04	-0.02	1000000000000	'chr3L:8351950:8351963:-@chr3L:8349503:8351005:-.A.withRI','chr3L:8351950:8351963:-@chr3L:8349503:8351005:-.B.dn_chr3L:8351950:8351963:-@chr3L:8349503:8351005:-.B.up'	(0,0):1607,(1,0):258,(1,1):25085	0:602,1:24741	(0,0):2388,(1,0):670,(1,1):27929	0:1533,1:27066	chr3L	-	83495038349503	83519638351963
332	Mhc	chr2L:16776850:16777439:+@chr2L:16780550:16780813:+	ri	0.01	0.01	0.02	0.03	0.02	0.03	-0.02	1000000000000	'chr2L:16776850:16777439:+@chr2L:16780550:16780813:+.A.withRI','chr2L:16776850:16777439:+@chr2L:16780550:16780813:+.B.up_chr2L:16776850:16777439:+@chr2L:16780550:16780813:+.B.dn'	(0,0):2451,(0,1):65,(1,0):261,(1,1):3810	0:322,1:3814	(0,0):7544,(0,1):301,(1,0):1758,(1,1):13755	0:2134,1:13680	chr2L	+	1677685016776850	1678081316780810
333	RpS26	chr2L:18443153:18443200:-@chr2L:18442505:18443070:-	ri	0	0	0	0.02	0.02	0.02	-0.02	1000000000000	'chr2L:18443153:18443200:-@chr2L:18442505:18443070:-.A.withRI','chr2L:18443153:18443200:-@chr2L:18442505:18443070:-.B.dn_chr2L:18443153:18443200:-@chr2L:18442505:18443070:-.B.up'	(0,0):6119,(0,1):7817,(1,0):22,(1,1):32960	0:64,1:40735	(0,0):6053,(0,1):5463,(1,0):274,(1,1):36883	0:951,1:41669	chr2L	-	1844250518442500	1844320018443200
334	Ald	chr3R:22084709:22084996:-@chr3R:22082947:22083763:-	ri	0.01	0.01	0.01	0.03	0.03	0.03	-0.02	1000000000000	'chr3R:22084709:22084996:-@chr3R:22082947:22083763:-.A.withRI','chr3R:22084709:22084996:-@chr3R:22082947:22083763:-.B.dn_chr3R:22084709:22084996:-@chr3R:22082947:22083763:-.B.up'	(0,0):3287,(0,1):93,(1,0):158,(1,1):21257	0:326,1:21182	(0,0):3821,(0,1):299,(1,0):746,(1,1):23266	0:1427,1:22884	chr3R	-	2208294722082940	2208499622084990
335	Fim	chrX:17195393:17196024:-@chrX:17181960:17183070:-	ri	0.02	0.02	0.02	0.04	0.04	0.05	-0.02	1000000000000	'chrX:17195393:17196024:-@chrX:17181960:17183070:-.A.withRI','chrX:17195393:17196024:-@chrX:17181960:17183070:-.B.dn_chrX:17195393:17196024:-@chrX:17181960:17183070:-.B.up'	(0,0):494,(0,1):60,(1,0):393,(1,1):2214	0:432,1:2235	(0,0):896,(0,1):91,(1,0):1073,(1,1):3061	0:1228,1:2997	chrX	-	1718196017181960	1719602417196020
336	Mhc	chr2L:16779093:16779199:+@chr2L:16780550:16780813:+	ri	0.01	0.01	0.02	0.03	0.02	0.03	-0.02	1000000000000	'chr2L:16779093:16779199:+@chr2L:16780550:16780813:+.A.withRI','chr2L:16779093:16779199:+@chr2L:16780550:16780813:+.B.up_chr2L:16779093:16779199:+@chr2L:16780550:16780813:+.B.dn'	(0,0):1106,(0,1):143,(1,0):118,(1,1):879	0:121,1:1019	(0,0):2725,(0,1):716,(1,0):848,(1,1):3303	0:932,1:3935	chr2L	+	1677909316779090	1678081316780810
337	RpL13A	chr3R:1450096:1450242:+@chr3R:1451236:1451679:+	ri	0.11	0.11	0.11	0.13	0.13	0.14	-0.02	1000000000000	'chr3R:1450096:1450242:+@chr3R:1451236:1451679:+.A.withRI','chr3R:1450096:1450242:+@chr3R:1451236:1451679:+.B.up_chr3R:1450096:1450242:+@chr3R:1451236:1451679:+.B.dn'	(0,0):25142,(0,1):3,(1,0):6850,(1,1):24342	0:9546,1:21649	(0,0):33825,(0,1):5,(1,0):10070,(1,1):29544	0:14002,1:25617	chr3R	+	14500961450096	14516791451679
338	His4r	chr3R:10451469:10451537:+@chr3R:10451748:10451951:+	ri	0.01	0.01	0.01	0.03	0.02	0.03	-0.02	1.81573e+07	'chr3R:10451469:10451537:+@chr3R:10451748:10451951:+.A.withRI','chr3R:10451469:10451537:+@chr3R:10451748:10451951:+.B.up_chr3R:10451469:10451537:+@chr3R:10451748:10451951:+.B.dn'	(0,0):1412,(0,1):1841,(1,0):108,(1,1):1758	0:129,1:3578	(0,0):447,(0,1):855,(1,0):99,(1,1):394	0:113,1:1235	chr3R	+	1045146910451460	1045195110451950
339	CG11357	chr3L:4542643:4542907:+@chr3L:4551002:4551940:+	ri	0.02	0.01	0.02	0.04	0.03	0.05	-0.02	1000000000000	'chr3L:4542643:4542907:+@chr3L:4551002:4551940:+.A.withRI','chr3L:4542643:4542907:+@chr3L:4551002:4551940:+.B.up_chr3L:4542643:4542907:+@chr3L:4551002:4551940:+.B.dn'	(0,0):65,(0,1):58,(1,0):59,(1,1):399	0:69,1:447	(0,0):37,(0,1):36,(1,0):165,(1,1):474	0:182,1:493	chr3L	+	45426434542643	45519404551940
340	wdb	chr3R:23407724:23407937:-@chr3R:23394001:23394313:-	ri	0.01	0.01	0.01	0.02	0.02	0.03	-0.01	1000000000000	'chr3R:23407724:23407937:-@chr3R:23394001:23394313:-.A.withRI','chr3R:23407724:23407937:-@chr3R:23394001:23394313:-.B.dn_chr3R:23407724:23407937:-@chr3R:23394001:23394313:-.B.up'	(0,0):129,(0,1):89,(1,0):121,(1,1):198	0:122,1:286	(0,0):249,(0,1):91,(1,0):386,(1,1):301	0:392,1:386	chr3R	-	2339400123394000	2340793723407930
341	fbp	chr2L:19764070:19764120:-@chr2L:19762488:19762814:-	ri	0.02	0.02	0.02	0.03	0.03	0.04	-0.01	1000000000000	'chr2L:19764070:19764120:-@chr2L:19762488:19762814:-.A.withRI','chr2L:19764070:19764120:-@chr2L:19762488:19762814:-.B.dn_chr2L:19764070:19764120:-@chr2L:19762488:19762814:-.B.up'	(0,0):1032,(0,1):77,(1,0):147,(1,1):1074	0:164,1:1134	(0,0):1636,(0,1):100,(1,0):329,(1,1):1274	0:375,1:1328	chr2L	-	1976248819762480	1976412019764120
342	SclA, SclB	chr2L:16839213:16839355:+@chr2L:16840270:16840578:+	ri	0.03	0.02	0.03	0.04	0.04	0.04	-0.01	122.2	'chr2L:16839213:16839355:+@chr2L:16840270:16840578:+.A.withRI','chr2L:16839213:16839355:+@chr2L:16840270:16840578:+.B.up_chr2L:16839213:16839355:+@chr2L:16840270:16840578:+.B.dn'	(0,0):1005,(0,1):420,(1,0):118,(1,1):719	0:136,1:1121	(0,0):3430,(0,1):1803,(1,0):786,(1,1):3180	0:885,1:4884	chr2L	+	1683921316839210	1684057816840570
343	RpL15	chr3LHet:2397802:2397819:+@chr3LHet:2398128:2398454:+	ri	0.02	0.02	0.02	0.03	0.03	0.03	-0.01	1000000000000	'chr3LHet:2397802:2397819:+@chr3LHet:2398128:2398454:+.A.withRI','chr3LHet:2397802:2397819:+@chr3LHet:2398128:2398454:+.B.up_chr3LHet:2397802:2397819:+@chr3LHet:2398128:2398454:+.B.dn'	(0,0):2798,(0,1):1390,(1,0):969,(1,1):22825	0:1369,1:23815	(0,0):703,(0,1):2514,(1,0):2347,(1,1):29663	0:3305,1:31219	chr3LHet	+	23978022397802	23984542398454
344	CG4019	chr2R:19501907:19501972:-@chr2R:19495655:19496204:-	ri	0.01	0	0.01	0.02	0.02	0.02	-0.01	1000000000000	'chr2R:19501907:19501972:-@chr2R:19495655:19496204:-.A.withRI','chr2R:19501907:19501972:-@chr2R:19495655:19496204:-.B.dn_chr2R:19501907:19501972:-@chr2R:19495655:19496204:-.B.up'	(0,0):715,(1,0):148,(1,1):2120	0:155,1:2113	(0,0):1136,(1,0):1061,(1,1):3927	0:1136,1:3852	chr2R	-	1949565519495650	1950197219501970
345	CG17664	chr2R:19503244:19503381:-@chr2R:19495655:19496204:-	ri	0.01	0	0.01	0.02	0.02	0.02	-0.01	1000000000000	'chr2R:19503244:19503381:-@chr2R:19495655:19496204:-.A.withRI','chr2R:19503244:19503381:-@chr2R:19495655:19496204:-.B.dn_chr2R:19503244:19503381:-@chr2R:19495655:19496204:-.B.up'	(0,0):739,(1,0):167,(1,1):2120	0:181,1:2106	(0,0):1236,(1,0):1120,(1,1):3928	0:1193,1:3855	chr2R	-	1949565519495650	1950338119503380
346	CG4019	chr2R:19501551:19501619:-@chr2R:19495655:19496204:-	ri	0.01	0	0.01	0.02	0.02	0.02	-0.01	1000000000000	'chr2R:19501551:19501619:-@chr2R:19495655:19496204:-.A.withRI','chr2R:19501551:19501619:-@chr2R:19495655:19496204:-.B.dn_chr2R:19501551:19501619:-@chr2R:19495655:19496204:-.B.up'	(0,0):712,(1,0):144,(1,1):2120	0:156,1:2108	(0,0):1130,(0,1):2,(1,0):1008,(1,1):3927	0:1086,1:3851	chr2R	-	1949565519495650	1950161919501610
347	Mhc	chr2L:16776850:16777439:+@chr2L:16779728:16779845:+	ri	0.01	0.01	0.02	0.02	0.02	0.03	-0.01	1000000000000	'chr2L:16776850:16777439:+@chr2L:16779728:16779845:+.A.withRI','chr2L:16776850:16777439:+@chr2L:16779728:16779845:+.B.up_chr2L:16776850:16777439:+@chr2L:16779728:16779845:+.B.dn'	(0,0):1265,(0,1):190,(1,0):192,(1,1):2935	0:232,1:3085	(0,0):3477,(0,1):1151,(1,0):1317,(1,1):10472	0:1563,1:11377	chr2L	+	1677685016776850	1677984516779840
348	Mhc	chr2L:16776850:16777439:+@chr2L:16779093:16779210:+	ri	0.01	0.01	0.01	0.02	0.02	0.02	-0.01	1000000000000	'chr2L:16776850:16777439:+@chr2L:16779093:16779210:+.A.withRI','chr2L:16776850:16777439:+@chr2L:16779093:16779210:+.B.up_chr2L:16776850:16777439:+@chr2L:16779093:16779210:+.B.dn'	(0,0):768,(0,1):494,(1,0):138,(1,1):2939	0:170,1:3401	(0,0):2223,(0,1):1253,(1,0):867,(1,1):10461	0:1141,1:11440	chr2L	+	1677685016776850	1677921016779210
349	Mhc	chr2L:16776850:16777439:+@chr2L:16782344:16782553:+	ri	0.04	0.04	0.05	0.05	0.05	0.05	-0.01	1.8252e+10	'chr2L:16776850:16777439:+@chr2L:16782344:16782553:+.A.withRI','chr2L:16776850:16777439:+@chr2L:16782344:16782553:+.B.up_chr2L:16776850:16777439:+@chr2L:16782344:16782553:+.B.dn'	(0,0):3534,(0,1):1,(1,0):1168,(1,1):3384	0:1312,1:3241	(0,0):11408,(0,1):3,(1,0):5212,(1,1):12152	0:5876,1:11491	chr2L	+	1677685016776850	1678255316782550
350	Sam-S	chr2L:110755:110877:+@chr2L:112690:113369:+	ri	0.04	0.03	0.04	0.05	0.05	0.06	-0.01	1000000000000	'chr2L:110755:110877:+@chr2L:112690:113369:+.A.withRI','chr2L:110755:110877:+@chr2L:112690:113369:+.B.up_chr2L:110755:110877:+@chr2L:112690:113369:+.B.dn'	(0,0):1967,(0,1):78,(1,0):416,(1,1):3796	0:565,1:3725	(0,0):3048,(0,1):45,(1,0):1031,(1,1):6198	0:1376,1:5898	chr2L	+	110755110755	113369113369
351	Nlp	chr3R:25831010:25831143:+@chr3R:25835400:25836074:+	ri	0.01	0	0.01	0.02	0.02	0.02	-0.01	1000000000000	'chr3R:25831010:25831143:+@chr3R:25835400:25836074:+.A.withRI','chr3R:25831010:25831143:+@chr3R:25835400:25836074:+.B.up_chr3R:25831010:25831143:+@chr3R:25835400:25836074:+.B.dn'	(0,0):511,(0,1):1138,(1,0):194,(1,1):3746	0:214,1:4864	(0,0):802,(0,1):1036,(1,0):813,(1,1):4806	0:917,1:5738	chr3R	+	2583101025831010	2583607425836070
352	GlyS	chr3R:10973197:10973329:-@chr3R:10969988:10970961:-	ri	0.01	0.01	0.01	0.02	0.02	0.02	-0.01	5.64167e+07	'chr3R:10973197:10973329:-@chr3R:10969988:10970961:-.A.withRI','chr3R:10973197:10973329:-@chr3R:10969988:10970961:-.B.dn_chr3R:10973197:10973329:-@chr3R:10969988:10970961:-.B.up'	(0,0):124,(0,1):173,(1,0):35,(1,1):1362	0:44,1:1526	(0,0):250,(0,1):324,(1,0):135,(1,1):2217	0:171,1:2505	chr3R	-	1096998810969980	1097332910973320
353	Mhc	chr2L:16779728:16779845:+@chr2L:16780550:16780813:+	ri	0.02	0.01	0.02	0.03	0.02	0.03	-0.01	28.9	'chr2L:16779728:16779845:+@chr2L:16780550:16780813:+.A.withRI','chr2L:16779728:16779845:+@chr2L:16780550:16780813:+.B.up_chr2L:16779728:16779845:+@chr2L:16780550:16780813:+.B.dn'	(0,0):620,(0,1):119,(1,0):64,(1,1):877	0:82,1:978	(0,0):1452,(0,1):234,(1,0):387,(1,1):3319	0:485,1:3455	chr2L	+	1677972816779720	1678081316780810
354	GlyS	chr3R:10972787:10973150:-@chr3R:10969988:10970961:-	ri	0.02	0.01	0.02	0.03	0.03	0.04	-0.01	1113.03	'chr3R:10972787:10973150:-@chr3R:10969988:10970961:-.A.withRI','chr3R:10972787:10973150:-@chr3R:10969988:10970961:-.B.dn_chr3R:10972787:10973150:-@chr3R:10969988:10970961:-.B.up'	(0,0):294,(1,0):33,(1,1):1362	0:64,1:1331	(0,0):576,(0,1):1,(1,0):115,(1,1):2228	0:191,1:2153	chr3R	-	1096998810969980	1097315010973150
355	CG7912, Nlp	chr3R:25831010:25834986|25831143:+@chr3R:25835400:25836074:+	a5ss	0.01	0.01	0.01	0.02	0.02	0.02	-0.01	1000000000000	'chr3R:25831010:25834986|25831143:+@chr3R:25835400:25836074:+.A.coreAndExt_chr3R:25831010:25834986|25831143:+@chr3R:25835400:25836074:+.A.dn','chr3R:25831010:25834986|25831143:+@chr3R:25835400:25836074:+.B.core_chr3R:25831010:25834986|25831143:+@chr3R:25835400:25836074:+.B.dn'	(0,0):517,(0,1):1138,(1,0):188,(1,1):3746	0:214,1:4858	(0,0):813,(0,1):1036,(1,0):802,(1,1):4806	0:919,1:5725	chr3R	+	2583101025831010	2583607425836070
356	Rtnl1	chr2L:4999225:4999339:-@chr2L:4994787:4994994:-	ri	0.03	0.03	0.04	0.02	0.02	0.02	0.01	1000000000000	'chr2L:4999225:4999339:-@chr2L:4994787:4994994:-.A.withRI','chr2L:4999225:4999339:-@chr2L:4994787:4994994:-.B.dn_chr2L:4999225:4999339:-@chr2L:4994787:4994994:-.B.up'	(0,0):2731,(0,1):362,(1,0):1443,(1,1):895	0:1469,1:1231	(0,0):1478,(0,1):359,(1,0):521,(1,1):413	0:530,1:763	chr2L	-	49947874994787	49993394999339
357	RpS3A	chr4:87718:87863:-@chr4:87466:87548:-	ri	0.98	0.98	0.98	0.96	0.95	0.96	0.02	1000000000000	'chr4:87718:87863:-@chr4:87466:87548:-.A.withRI','chr4:87718:87863:-@chr4:87466:87548:-.B.dn_chr4:87718:87863:-@chr4:87466:87548:-.B.up'	(0,0):8543,(0,1):6,(1,0):30323,(1,1):608	0:30758,1:179	(0,0):6874,(0,1):6,(1,0):25661,(1,1):967	0:26312,1:322	chr4	-	8746687466	8786387863
358	psq	chr2R:6449531:6493639|6449695:+@chr2R:6498055:6499020:+	a5ss	0.03	0.03	0.04	0.01	0.01	0.02	0.02	1000000000000	'chr2R:6449531:6493639|6449695:+@chr2R:6498055:6499020:+.A.coreAndExt_chr2R:6449531:6493639|6449695:+@chr2R:6498055:6499020:+.A.dn','chr2R:6449531:6493639|6449695:+@chr2R:6498055:6499020:+.B.core_chr2R:6449531:6493639|6449695:+@chr2R:6498055:6499020:+.B.dn'	(0,0):76,(0,1):23,(1,0):405,(1,1):256	0:415,1:269	(0,0):62,(0,1):35,(1,0):173,(1,1):260	0:177,1:291	chr2R	+	64495316449531	64990206499020
359	psq	chr2R:6449531:6493562|6449695:+@chr2R:6498055:6499020:+	a5ss	0.03	0.03	0.04	0.01	0.01	0.02	0.02	1000000000000	'chr2R:6449531:6493562|6449695:+@chr2R:6498055:6499020:+.A.coreAndExt_chr2R:6449531:6493562|6449695:+@chr2R:6498055:6499020:+.A.dn','chr2R:6449531:6493562|6449695:+@chr2R:6498055:6499020:+.B.core_chr2R:6449531:6493562|6449695:+@chr2R:6498055:6499020:+.B.dn'	(0,0):76,(0,1):23,(1,0):405,(1,1):256	0:411,1:273	(0,0):62,(0,1):35,(1,0):173,(1,1):260	0:176,1:292	chr2R	+	64495316449531	64990206499020
360	Rtnl1	chr2L:5008181:5009744:-@chr2L:4994787:4994994:-	ri	0.04	0.04	0.05	0.02	0.02	0.03	0.02	1000000000000	'chr2L:5008181:5009744:-@chr2L:4994787:4994994:-.A.withRI','chr2L:5008181:5009744:-@chr2L:4994787:4994994:-.B.dn_chr2L:5008181:5009744:-@chr2L:4994787:4994994:-.B.up'	(0,0):3691,(0,1):200,(1,0):1844,(1,1):4837	0:2063,1:4818	(0,0):2507,(0,1):206,(1,0):1227,(1,1):5747	0:1360,1:5820	chr2L	-	49947874994787	50097445009744
361	eIF-5A	chr2R:19946007:19946185:+@chr2R:19946455:19946656:+	ri	0.05	0.04	0.05	0.03	0.02	0.03	0.02	1000000000000	'chr2R:19946007:19946185:+@chr2R:19946455:19946656:+.A.withRI','chr2R:19946007:19946185:+@chr2R:19946455:19946656:+.B.up_chr2R:19946007:19946185:+@chr2R:19946455:19946656:+.B.dn'	(0,0):17795,(0,1):3398,(1,0):1062,(1,1):9736	0:1542,1:12654	(0,0):16613,(0,1):2931,(1,0):745,(1,1):14712	0:1127,1:17261	chr2R	+	1994600719946000	1994665619946650
362	RpS3A	chr4:87718:87863:-@chr4:87466:87532:-	ri	0.99	0.98	0.99	0.96	0.95	0.96	0.03	1000000000000	'chr4:87718:87863:-@chr4:87466:87532:-.A.withRI','chr4:87718:87863:-@chr4:87466:87532:-.B.dn_chr4:87718:87863:-@chr4:87466:87532:-.B.up'	(0,0):8543,(0,1):6,(1,0):30424,(1,1):507	0:30835,1:102	(0,0):6874,(0,1):6,(1,0):25740,(1,1):888	0:26370,1:264	chr4	-	8746687466	8786387863
363	dlt, dlt	chr3L:1795199:1795295:-@chr3L:1789017:1789101:-	ri	0.04	0.03	0.05	0.01	0.01	0.01	0.03	1.81465e+07	'chr3L:1795199:1795295:-@chr3L:1789017:1789101:-.A.withRI','chr3L:1795199:1795295:-@chr3L:1789017:1789101:-.B.dn_chr3L:1795199:1795295:-@chr3L:1789017:1789101:-.B.up'	(0,0):42,(0,1):31,(1,0):240,(1,1):2	0:240,1:33	(0,0):146,(0,1):109,(1,0):200,(1,1):2	0:200,1:111	chr3L	-	17890171789017	17952951795295
364	Nplp2	chr3L:13349827:13349952|13349946:+@chr3L:13350108:13350349:+	a5ss	1	1	1	0.97	0.96	0.97	0.03	1000000000000	'chr3L:13349827:13349952|13349946:+@chr3L:13350108:13350349:+.A.coreAndExt_chr3L:13349827:13349952|13349946:+@chr3L:13350108:13350349:+.A.dn','chr3L:13349827:13349952|13349946:+@chr3L:13350108:13350349:+.B.core_chr3L:13349827:13349952|13349946:+@chr3L:13350108:13350349:+.B.dn'	(0,0):10975,(1,0):13374,(1,1):16753	0:30126,1:1	(0,0):23169,(0,1):551,(1,0):17524,(1,1):33890	0:50242,1:1723	chr3L	+	1334982713349820	1335034913350340
365	emp	chr2R:20870550:20870760:-@chr2R:20867056:20867184:-	ri	0.06	0.05	0.07	0.03	0.02	0.03	0.03	533221	'chr2R:20870550:20870760:-@chr2R:20867056:20867184:-.A.withRI','chr2R:20870550:20870760:-@chr2R:20867056:20867184:-.B.dn_chr2R:20870550:20870760:-@chr2R:20867056:20867184:-.B.up'	(0,0):60,(0,1):79,(1,0):141,(1,1):18	0:143,1:95	(0,0):55,(0,1):254,(1,0):188,(1,1):41	0:188,1:295	chr2R	-	2086705620867050	2087076020870760
366	RpS25	chr3R:7041691:7041557|7041415:-@chr3R:7041145:7041346:-	a5ss	0.96	0.96	0.96	0.92	0.91	0.93	0.04	1000000000000	'chr3R:7041691:7041557|7041415:-@chr3R:7041145:7041346:-.A.dn_chr3R:7041691:7041557|7041415:-@chr3R:7041145:7041346:-.A.coreAndExt','chr3R:7041691:7041557|7041415:-@chr3R:7041145:7041346:-.B.dn_chr3R:7041691:7041557|7041415:-@chr3R:7041145:7041346:-.B.core'	(0,0):11381,(0,1):196,(1,0):38450,(1,1):8875	0:46547,1:974	(0,0):11814,(0,1):104,(1,0):24148,(1,1):8180	0:31084,1:1348	chr3R	-	70411457041145	70416917041691
367	CG45078	chr3R:6602899:6603083:-@chr3R:6598857:6598883:-	ri	0.06	0.05	0.06	0.02	0.02	0.02	0.04	1000000000000	'chr3R:6602899:6603083:-@chr3R:6598857:6598883:-.A.withRI','chr3R:6602899:6603083:-@chr3R:6598857:6598883:-.B.dn_chr3R:6602899:6603083:-@chr3R:6598857:6598883:-.B.up'	(0,0):3688,(0,1):55,(1,0):7020,(1,1):1384	0:7092,1:1367	(0,0):3102,(0,1):15,(1,0):5187,(1,1):2585	0:5251,1:2536	chr3R	-	65988576598857	66030836603083
368	CG17826	chr3L:11943059:11943714:+@chr3L:11944351:11945390:+	ri	0.06	0.05	0.07	0.02	0.01	0.02	0.04	1000000000000	'chr3L:11943059:11943714:+@chr3L:11944351:11945390:+.A.withRI','chr3L:11943059:11943714:+@chr3L:11944351:11945390:+.B.up_chr3L:11943059:11943714:+@chr3L:11944351:11945390:+.B.dn'	(0,0):1133,(1,0):248,(1,1):9886	0:860,1:9274	(0,0):1587,(1,0):99,(1,1):12890	0:312,1:12677	chr3L	+	1194305911943050	1194539011945390
369	RpS5a	chrX:17041105:17041233:-@chrX:17040831:17041052:-	ri	0.96	0.95	0.97	0.92	0.91	0.93	0.04	1000000000000	'chrX:17041105:17041233:-@chrX:17040831:17041052:-.A.withRI','chrX:17041105:17041233:-@chrX:17040831:17041052:-.B.dn_chrX:17041105:17041233:-@chrX:17040831:17041052:-.B.up'	(0,0):11302,(0,1):34,(1,0):9443,(1,1):6992	0:16011,1:458	(0,0):20913,(0,1):32,(1,0):8331,(1,1):9259	0:16561,1:1061	chrX	-	1704083117040830	1704123317041230
370	CG5174	chr2R:14311831:14311991:+@chr2R:14312845:14312913:+	ri	0.1	0.08	0.13	0.06	0.05	0.07	0.04	14.51	'chr2R:14311831:14311991:+@chr2R:14312845:14312913:+.A.withRI','chr2R:14311831:14311991:+@chr2R:14312845:14312913:+.B.up_chr2R:14311831:14311991:+@chr2R:14312845:14312913:+.B.dn'	(0,0):1382,(0,1):9,(1,0):210,(1,1):130	0:223,1:126	(0,0):1132,(0,1):4,(1,0):220,(1,1):240	0:241,1:223	chr2R	+	1431183114311830	1431291314312910
371	CG44251	chr2R:8839836:8839678|8837658:-@chr2R:8835853:8837591:-	a5ss	0.95	0.94	0.96	0.91	0.9	0.92	0.04	5.58088e+11	'chr2R:8839836:8839678|8837658:-@chr2R:8835853:8837591:-.A.dn_chr2R:8839836:8839678|8837658:-@chr2R:8835853:8837591:-.A.coreAndExt','chr2R:8839836:8839678|8837658:-@chr2R:8835853:8837591:-.B.dn_chr2R:8839836:8839678|8837658:-@chr2R:8835853:8837591:-.B.core'	(0,0):1559,(0,1):131,(1,0):7205,(1,1):1372	0:8487,1:221	(0,0):1893,(0,1):225,(1,0):7766,(1,1):2310	0:9933,1:368	chr2R	-	88358538835853	88398368839836
372	eIF-5A	chr2R:19946007:19946185:+@chr2R:19946509:19946656:+	ri	0.21	0.2	0.22	0.16	0.15	0.16	0.05	1000000000000	'chr2R:19946007:19946185:+@chr2R:19946509:19946656:+.A.withRI','chr2R:19946007:19946185:+@chr2R:19946509:19946656:+.B.up_chr2R:19946007:19946185:+@chr2R:19946509:19946656:+.B.dn'	(0,0):19587,(0,1):1606,(1,0):4702,(1,1):6096	0:5971,1:6433	(0,0):17831,(0,1):1713,(1,0):5247,(1,1):10210	0:6832,1:10338	chr2R	+	1994600719946000	1994665619946650
373	GstT4	chrX:13298691:13299117:+@chrX:13302689:13302824:+	ri	0.14	0.13	0.14	0.09	0.09	0.1	0.05	1000000000000	'chrX:13298691:13299117:+@chrX:13302689:13302824:+.A.withRI','chrX:13298691:13299117:+@chrX:13302689:13302824:+.B.up_chrX:13298691:13299117:+@chrX:13302689:13302824:+.B.dn'	(0,0):3343,(0,1):10,(1,0):2654,(1,1):1994	0:2908,1:1750	(0,0):1085,(0,1):9,(1,0):1372,(1,1):1482	0:1525,1:1338	chrX	+	1329869113298690	1330282413302820
374	eIF-5A	chr2R:19946007:19946176:+@chr2R:19946455:19946656:+	ri	0.08	0.08	0.08	0.03	0.03	0.03	0.05	1000000000000	'chr2R:19946007:19946176:+@chr2R:19946455:19946656:+.A.withRI','chr2R:19946007:19946176:+@chr2R:19946455:19946656:+.B.up_chr2R:19946007:19946176:+@chr2R:19946455:19946656:+.B.dn'	(0,0):18148,(0,1):3045,(1,0):1832,(1,1):8966	0:2558,1:11285	(0,0):16890,(0,1):2654,(1,0):874,(1,1):14583	0:1247,1:16864	chr2R	+	1994600719946000	1994665619946650
375	CG32603	chrX:14079613:14079874:-@chrX:14078735:14079303:-	ri	0.99	0.99	1	0.94	0.92	0.95	0.05	1000000000000	'chrX:14079613:14079874:-@chrX:14078735:14079303:-.A.withRI','chrX:14079613:14079874:-@chrX:14078735:14079303:-.B.dn_chrX:14079613:14079874:-@chrX:14078735:14079303:-.B.up'	(0,0):987,(0,1):4,(1,0):2031,(1,1):2317	0:4339,1:13	(0,0):2049,(0,1):63,(1,0):3010,(1,1):3474	0:6213,1:334	chrX	-	1407873514078730	1407987414079870
376	Argk	chr3L:9042496:9043459:-@chr3L:9041923:9042402:-	ri	0.92	0.92	0.93	0.86	0.86	0.87	0.06	1000000000000	'chr3L:9042496:9043459:-@chr3L:9041923:9042402:-.A.withRI','chr3L:9042496:9043459:-@chr3L:9041923:9042402:-.B.dn_chr3L:9042496:9043459:-@chr3L:9041923:9042402:-.B.up'	(0,0):7197,(0,1):365,(1,0):18802,(1,1):87377	0:98686,1:7858	(0,0):6329,(0,1):770,(1,0):15505,(1,1):71855	0:76686,1:11444	chr3L	-	90419239041923	90434599043459
377	CG45078	chr3R:6602899:6603083:-@chr3R:6597059:6597189:-	ri	0.12	0.11	0.12	0.06	0.05	0.06	0.06	1000000000000	'chr3R:6602899:6603083:-@chr3R:6597059:6597189:-.A.withRI','chr3R:6602899:6603083:-@chr3R:6597059:6597189:-.B.dn_chr3R:6602899:6603083:-@chr3R:6597059:6597189:-.B.up'	(0,0):4604,(1,0):7665,(1,1):1393	0:7794,1:1264	(0,0):5159,(1,0):7167,(1,1):2643	0:7317,1:2493	chr3R	-	65970596597059	66030836603083
378	VhaM9.7-b	chr3L:21532856:21533182:+@chr3L:21533253:21533300:+@chr3L:21533369:21534007:+	se	0.93	0.92	0.94	0.87	0.85	0.88	0.06	1000000000000	'chr3L:21532856:21533182:+@chr3L:21533253:21533300:+@chr3L:21533369:21534007:+.A.up_chr3L:21532856:21533182:+@chr3L:21533253:21533300:+@chr3L:21533369:21534007:+.A.se_chr3L:21532856:21533182:+@chr3L:21533253:21533300:+@chr3L:21533369:21534007:+.A.dn','chr3L:21532856:21533182:+@chr3L:21533253:21533300:+@chr3L:21533369:21534007:+.B.up_chr3L:21532856:21533182:+@chr3L:21533253:21533300:+@chr3L:215333…	(0,0):108,(0,1):57,(1,0):3320,(1,1):5406	0:8226,1:557	(0,0):165,(0,1):94,(1,0):2513,(1,1):7456	0:8817,1:1246	chr3L	+	2153285621532850	2153400721534000
379	CycG	chr3R:27424760:27425070:-@chr3R:27424172:27424689:-	ri	0.96	0.95	0.98	0.9	0.89	0.92	0.06	4.85802e+11	'chr3R:27424760:27425070:-@chr3R:27424172:27424689:-.A.withRI','chr3R:27424760:27425070:-@chr3R:27424172:27424689:-.B.dn_chr3R:27424760:27425070:-@chr3R:27424172:27424689:-.B.up'	(0,0):567,(0,1):8,(1,0):1381,(1,1):3347	0:4547,1:189	(0,0):1385,(0,1):39,(1,0):2323,(1,1):7144	0:8578,1:928	chr3R	-	2742417227424170	2742507027425070
380	CG12913, Syb	chr2R:6138384:6138649:-@chr2R:6137874:6138091:-@chr2R:6136949:6137332:-	se	0.33	0.32	0.35	0.27	0.25	0.28	0.06	1000000000000	'chr2R:6138384:6138649:-@chr2R:6137874:6138091:-@chr2R:6136949:6137332:-.A.dn_chr2R:6138384:6138649:-@chr2R:6137874:6138091:-@chr2R:6136949:6137332:-.A.se_chr2R:6138384:6138649:-@chr2R:6137874:6138091:-@chr2R:6136949:6137332:-.A.up','chr2R:6138384:6138649:-@chr2R:6137874:6138091:-@chr2R:6136949:6137332:-.B.dn_chr2R:6138384:6138649:-@chr2R:6137874:6138091:-@chr2R:6136949:6137332:-.B.up'	(0,0):888,(0,1):1101,(1,0):1296,(1,1):2931	0:2233,1:3095	(0,0):1013,(0,1):1041,(1,0):1011,(1,1):3456	0:1897,1:3611	chr2R	-	61369496136949	61386496138649
381	EloC	chr2R:15333644:15333453|15333261:-@chr2R:15332572:15332884:-	a5ss	0.18	0.16	0.21	0.12	0.1	0.14	0.06	130.37	'chr2R:15333644:15333453|15333261:-@chr2R:15332572:15332884:-.A.dn_chr2R:15333644:15333453|15333261:-@chr2R:15332572:15332884:-.A.coreAndExt','chr2R:15333644:15333453|15333261:-@chr2R:15332572:15332884:-.B.dn_chr2R:15333644:15333453|15333261:-@chr2R:15332572:15332884:-.B.core'	(0,0):537,(0,1):202,(1,0):166,(1,1):648	0:273,1:743	(0,0):429,(0,1):242,(1,0):129,(1,1):762	0:205,1:928	chr2R	-	1533257215332570	1533364415333640
382	CG7702	chr3R:14495114:14495284:+@chr3R:14496860:14497096:+	ri	0.1	0.07	0.13	0.04	0.03	0.05	0.06	599.2	'chr3R:14495114:14495284:+@chr3R:14496860:14497096:+.A.withRI','chr3R:14495114:14495284:+@chr3R:14496860:14497096:+.B.up_chr3R:14495114:14495284:+@chr3R:14496860:14497096:+.B.dn'	(0,0):33,(0,1):2,(1,0):71,(1,1):98	0:81,1:90	(0,0):40,(1,0):54,(1,1):202	0:58,1:198	chr3R	+	1449511414495110	1449709614497090
383	RNASEK	chr2R:75451:75648:-@chr2R:75265:75352:-	ri	0.12	0.1	0.13	0.06	0.05	0.08	0.06	420503	'chr2R:75451:75648:-@chr2R:75265:75352:-.A.withRI','chr2R:75451:75648:-@chr2R:75265:75352:-.B.dn_chr2R:75451:75648:-@chr2R:75265:75352:-.B.up'	(0,0):2786,(0,1):5,(1,0):239,(1,1):1489	0:356,1:1377	(0,0):1801,(0,1):2,(1,0):68,(1,1):781	0:115,1:736	chr2R	-	7526575265	7564875648
384	Atf6	chr2R:1032207:1032363:+@chr2R:1040294:1040670:+	ri	0.18	0.16	0.2	0.12	0.1	0.13	0.06	27371.3	'chr2R:1032207:1032363:+@chr2R:1040294:1040670:+.A.withRI','chr2R:1032207:1032363:+@chr2R:1040294:1040670:+.B.up_chr2R:1032207:1032363:+@chr2R:1040294:1040670:+.B.dn'	(0,0):376,(0,1):11,(1,0):1062,(1,1):241	0:1107,1:207	(0,0):305,(0,1):23,(1,0):946,(1,1):317	0:982,1:304	chr2R	+	10322071032207	10406701040670
385	up	chrX:13490544:13490781:-@chrX:13490412:13490489:-	ri	0.99	0.98	0.99	0.92	0.9	0.94	0.07	1000000000000	'chrX:13490544:13490781:-@chrX:13490412:13490489:-.A.withRI','chrX:13490544:13490781:-@chrX:13490412:13490489:-.B.dn_chrX:13490544:13490781:-@chrX:13490412:13490489:-.B.up'	(0,0):4675,(0,1):7,(1,0):5112,(1,1):4574	0:9617,1:76	(0,0):8010,(0,1):1,(1,0):7969,(1,1):14438	0:21076,1:1332	chrX	-	1349041213490410	1349078113490780
386	RpS25	chr3R:7041691:7041557|7041414:-@chr3R:7041145:7041346:-	a5ss	0.94	0.93	0.94	0.87	0.86	0.88	0.07	1000000000000	'chr3R:7041691:7041557|7041414:-@chr3R:7041145:7041346:-.A.dn_chr3R:7041691:7041557|7041414:-@chr3R:7041145:7041346:-.A.coreAndExt','chr3R:7041691:7041557|7041414:-@chr3R:7041145:7041346:-.B.dn_chr3R:7041691:7041557|7041414:-@chr3R:7041145:7041346:-.B.core'	(0,0):21121,(0,1):197,(1,0):28710,(1,1):8874	0:36622,1:1159	(0,0):18429,(0,1):110,(1,0):17533,(1,1):8174	0:24035,1:1782	chr3R	-	70411457041145	70416917041691
387	RFeSP	chr2L:1613044:1613423:-@chr2L:1612495:1612988:-	ri	0.07	0.06	0.08	0	0	0	0.07	1000000000000	'chr2L:1613044:1613423:-@chr2L:1612495:1612988:-.A.withRI','chr2L:1613044:1613423:-@chr2L:1612495:1612988:-.B.dn_chr2L:1613044:1613423:-@chr2L:1612495:1612988:-.B.up'	(0,0):473,(0,1):765,(1,0):109,(1,1):4339	0:393,1:4820	(0,0):592,(0,1):916,(1,0):1,(1,1):8986	0:9,1:9894	chr2L	-	16124951612495	16134231613423
388	Sam-S	chr2L:110755:110877:+@chr2L:111038:111117:+	ri	0.19	0.16	0.24	0.12	0.1	0.14	0.07	53.04	'chr2L:110755:110877:+@chr2L:111038:111117:+.A.withRI','chr2L:110755:110877:+@chr2L:111038:111117:+.B.up_chr2L:110755:110877:+@chr2L:111038:111117:+.B.dn'	(0,0):684,(0,1):2,(1,0):125,(1,1):141	0:135,1:133	(0,0):1180,(0,1):2,(1,0):181,(1,1):346	0:186,1:343	chr2L	+	110755110755	111117111117
389	RNASEK	chr2R:75451:75648:-@chr2R:75265:75347:-	ri	0.14	0.12	0.15	0.07	0.05	0.08	0.07	1000000000000	'chr2R:75451:75648:-@chr2R:75265:75347:-.A.withRI','chr2R:75451:75648:-@chr2R:75265:75347:-.B.dn_chr2R:75451:75648:-@chr2R:75265:75347:-.B.up'	(0,0):2790,(0,1):1,(1,0):289,(1,1):1439	0:408,1:1321	(0,0):1803,(1,0):74,(1,1):775	0:102,1:747	chr2R	-	7526575265	7564875648
390	RpS11	chr2R:8087933:8088055:-@chr2R:8087339:8087544:-	ri	0.33	0.32	0.34	0.26	0.25	0.27	0.07	1000000000000	'chr2R:8087933:8088055:-@chr2R:8087339:8087544:-.A.withRI','chr2R:8087933:8088055:-@chr2R:8087339:8087544:-.B.dn_chr2R:8087933:8088055:-@chr2R:8087339:8087544:-.B.up'	(0,0):14606,(0,1):3,(1,0):6707,(1,1):6993	0:8936,1:4767	(0,0):13966,(0,1):2,(1,0):6133,(1,1):7900	0:8255,1:5780	chr2R	-	80873398087339	80880558088055
391	eIF-5A	chr2R:19946455:19946656:+@chr2R:19946734:19946997:+	ri	0.2	0.19	0.21	0.12	0.11	0.12	0.08	1000000000000	'chr2R:19946455:19946656:+@chr2R:19946734:19946997:+.A.withRI','chr2R:19946455:19946656:+@chr2R:19946734:19946997:+.B.up_chr2R:19946455:19946656:+@chr2R:19946734:19946997:+.B.dn'	(0,0):10192,(0,1):401,(1,0):1662,(1,1):15320	0:4455,1:12928	(0,0):8466,(0,1):111,(1,0):800,(1,1):13738	0:2129,1:12520	chr2R	+	1994645519946450	1994699719946990
392	RpS11	chr2R:8087699:8087746:-@chr2R:8087339:8087544:-	ri	0.45	0.44	0.47	0.37	0.35	0.38	0.08	1000000000000	'chr2R:8087699:8087746:-@chr2R:8087339:8087544:-.A.withRI','chr2R:8087699:8087746:-@chr2R:8087339:8087544:-.B.dn_chr2R:8087699:8087746:-@chr2R:8087339:8087544:-.B.up'	(0,0):14559,(0,1):45,(1,0):6555,(1,1):7112	0:9728,1:3984	(0,0):13873,(0,1):65,(1,0):5920,(1,1):7965	0:8782,1:5168	chr2R	-	80873398087339	80877468087746
393	RpS3A	chr4:87674:87863:-@chr4:87466:87532:-	ri	0.98	0.98	0.98	0.89	0.88	0.9	0.09	1000000000000	'chr4:87674:87863:-@chr4:87466:87532:-.A.withRI','chr4:87674:87863:-@chr4:87466:87532:-.B.dn_chr4:87674:87863:-@chr4:87466:87532:-.B.up'	(0,0):8543,(0,1):6,(1,0):26478,(1,1):4453	0:30740,1:197	(0,0):6874,(0,1):6,(1,0):19172,(1,1):7456	0:25464,1:1170	chr4	-	8746687466	8786387863
394	CG17167	chrXHet:56978:57124:+@chrXHet:58624:59583:+	ri	0.15	0.12	0.18	0.06	0.05	0.07	0.09	4.06276e+08	'chrXHet:56978:57124:+@chrXHet:58624:59583:+.A.withRI','chrXHet:56978:57124:+@chrXHet:58624:59583:+.B.up_chrXHet:56978:57124:+@chrXHet:58624:59583:+.B.dn'	(0,0):254,(1,0):123,(1,1):513	0:230,1:406	(0,0):425,(0,1):6,(1,0):141,(1,1):1349	0:241,1:1255	chrXHet	+	5697856978	5958359583
395	CG10137, CG10165	chr2L:19530090:19530189:-@chr2L:19528088:19528369:-	ri	0.13	0.1	0.18	0.04	0.03	0.05	0.09	7.14917e+07	'chr2L:19530090:19530189:-@chr2L:19528088:19528369:-.A.withRI','chr2L:19530090:19530189:-@chr2L:19528088:19528369:-.B.dn_chr2L:19530090:19530189:-@chr2L:19528088:19528369:-.B.up'	(0,0):70,(0,1):3,(1,0):96,(1,1):75	0:108,1:66	(0,0):88,(0,1):3,(1,0):65,(1,1):185	0:75,1:178	chr2L	-	1952808819528080	1953018919530180
396	CG9119	chr3L:1204587:1204884:-@chr3L:1203243:1204286:-	ri	0.19	0.18	0.21	0.1	0.09	0.11	0.09	1000000000000	'chr3L:1204587:1204884:-@chr3L:1203243:1204286:-.A.withRI','chr3L:1204587:1204884:-@chr3L:1203243:1204286:-.B.dn_chr3L:1204587:1204884:-@chr3L:1203243:1204286:-.B.up'	(0,0):1099,(0,1):508,(1,0):506,(1,1):6993	0:1942,1:6065	(0,0):832,(0,1):287,(1,0):268,(1,1):8581	0:1176,1:7960	chr3L	-	12032431203243	12048841204884
397	CG31789	chr2L:18605928:18606085:+@chr2L:18606178:18606523:+	ri	0.44	0.43	0.45	0.34	0.33	0.35	0.1	1000000000000	'chr2L:18605928:18606085:+@chr2L:18606178:18606523:+.A.withRI','chr2L:18605928:18606085:+@chr2L:18606178:18606523:+.B.up_chr2L:18605928:18606085:+@chr2L:18606178:18606523:+.B.dn'	(0,0):9101,(0,1):868,(1,0):5845,(1,1):17420	0:12151,1:11982	(0,0):4467,(0,1):529,(1,0):3589,(1,1):12101	0:6432,1:9787	chr2L	+	1860592818605920	1860652318606520
398	RpS7	chr3R:26034212:26034379:-@chr3R:26033815:26034117:-	ri	0.42	0.41	0.43	0.32	0.31	0.32	0.1	1000000000000	'chr3R:26034212:26034379:-@chr3R:26033815:26034117:-.A.withRI','chr3R:26034212:26034379:-@chr3R:26033815:26034117:-.B.dn_chr3R:26034212:26034379:-@chr3R:26033815:26034117:-.B.up'	(0,0):21632,(0,1):730,(1,0):5845,(1,1):20504	0:13451,1:13628	(0,0):33165,(0,1):818,(1,0):5477,(1,1):22778	0:11354,1:17719	chr3R	-	2603381526033810	2603437926034370
399	CG32495	chrX:17794649:17794861:+@chrX:17797981:17798114:+@chrX:17798643:17798685:+	se	0.24	0.2	0.27	0.14	0.1	0.18	0.1	34.46	'chrX:17794649:17794861:+@chrX:17797981:17798114:+@chrX:17798643:17798685:+.A.up_chrX:17794649:17794861:+@chrX:17797981:17798114:+@chrX:17798643:17798685:+.A.se_chrX:17794649:17794861:+@chrX:17797981:17798114:+@chrX:17798643:17798685:+.A.dn','chrX:17794649:17794861:+@chrX:17797981:17798114:+@chrX:17798643:17798685:+.B.up_chrX:17794649:17794861:+@chrX:17797981:17798114:+@chrX:17798643:17798685:+.B…	(0,0):2261,(0,1):3,(1,0):258,(1,1):659	0:415,1:505	(0,0):830,(1,0):55,(1,1):247	0:82,1:220	chrX	+	1779464917794640	1779868517798680
400	CG42235	chr3R:21736597:21736648:+@chr3R:21738943:21739165:+	ri	0.12	0.1	0.14	0.02	0.02	0.03	0.1	1000000000000	'chr3R:21736597:21736648:+@chr3R:21738943:21739165:+.A.withRI','chr3R:21736597:21736648:+@chr3R:21738943:21739165:+.B.up_chr3R:21736597:21736648:+@chr3R:21738943:21739165:+.B.dn'	(0,0):531,(0,1):50,(1,0):576,(1,1):127	0:591,1:162	(0,0):224,(0,1):51,(1,0):144,(1,1):176	0:150,1:221	chr3R	+	2173659721736590	2173916521739160
401	CG15279	chr2L:14848674:14848977:-@chr2L:14848005:14848254:-@chr2L:14846790:14847057:-	se	0.16	0.11	0.21	0.06	0.03	0.1	0.1	94.34	'chr2L:14848674:14848977:-@chr2L:14848005:14848254:-@chr2L:14846790:14847057:-.A.dn_chr2L:14848674:14848977:-@chr2L:14848005:14848254:-@chr2L:14846790:14847057:-.A.se_chr2L:14848674:14848977:-@chr2L:14848005:14848254:-@chr2L:14846790:14847057:-.A.up','chr2L:14848674:14848977:-@chr2L:14848005:14848254:-@chr2L:14846790:14847057:-.B.dn_chr2L:14848674:14848977:-@chr2L:14848005:14848254:-@chr2L:148467…	(0,0):120,(0,1):85,(1,0):44,(1,1):174	0:59,1:244	(0,0):116,(0,1):57,(1,0):10,(1,1):117	0:16,1:168	chr2L	-	1484679014846790	1484897714848970
402	lig	chr2R:3963798:3963953:+@chr2R:3964765:3964796:+	ri	0.15	0.09	0.24	0.05	0.04	0.07	0.1	18.31	'chr2R:3963798:3963953:+@chr2R:3964765:3964796:+.A.withRI','chr2R:3963798:3963953:+@chr2R:3964765:3964796:+.B.up_chr2R:3963798:3963953:+@chr2R:3964765:3964796:+.B.dn'	(0,0):112,(0,1):2,(1,0):73,(1,1):20	0:75,1:20	(0,0):131,(0,1):2,(1,0):75,(1,1):63	0:76,1:64	chr2R	+	39637983963798	39647963964796
403	Cys	chr3R:10394753:10395029:+@chr3R:10395152:10395363:+	ri	0.62	0.6	0.63	0.51	0.49	0.54	0.11	1000000000000	'chr3R:10394753:10395029:+@chr3R:10395152:10395363:+.A.withRI','chr3R:10394753:10395029:+@chr3R:10395152:10395363:+.B.up_chr3R:10394753:10395029:+@chr3R:10395152:10395363:+.B.dn'	(0,0):2803,(0,1):182,(1,0):2602,(1,1):3787	0:4621,1:1950	(0,0):1518,(0,1):102,(1,0):1226,(1,1):2177	0:2059,1:1446	chr3R	+	1039475310394750	1039536310395360
404	RpS7	chr3R:26034212:26034379:-@chr3R:26033815:26034114:-	ri	0.46	0.45	0.47	0.35	0.34	0.36	0.11	1000000000000	'chr3R:26034212:26034379:-@chr3R:26033815:26034114:-.A.withRI','chr3R:26034212:26034379:-@chr3R:26033815:26034114:-.B.dn_chr3R:26034212:26034379:-@chr3R:26033815:26034114:-.B.up'	(0,0):21627,(0,1):735,(1,0):6451,(1,1):19898	0:14493,1:12591	(0,0):33159,(0,1):824,(1,0):6239,(1,1):22016	0:12338,1:16741	chr3R	-	2603381526033810	2603437926034370
405	crc	chr2L:21318321:21318419:+@chr2L:21318516:21318584:+	ri	0.21	0.17	0.25	0.1	0.08	0.12	0.11	3.70745e+09	'chr2L:21318321:21318419:+@chr2L:21318516:21318584:+.A.withRI','chr2L:21318321:21318419:+@chr2L:21318516:21318584:+.B.up_chr2L:21318321:21318419:+@chr2L:21318516:21318584:+.B.dn'	(0,0):2127,(1,0):151,(1,1):242	0:181,1:212	(0,0):2566,(1,0):132,(1,1):488	0:153,1:467	chr2L	+	2131832121318320	2131858421318580
406	CG3209, Mlp60A	chr2R:19961391:19961646:-@chr2R:19960551:19960925:-	ri	0.21	0.18	0.24	0.09	0.07	0.1	0.12	1000000000000	'chr2R:19961391:19961646:-@chr2R:19960551:19960925:-.A.withRI','chr2R:19961391:19961646:-@chr2R:19960551:19960925:-.B.dn_chr2R:19961391:19961646:-@chr2R:19960551:19960925:-.B.up'	(0,0):235,(1,0):243,(1,1):1072	0:464,1:851	(0,0):187,(1,0):94,(1,1):1029	0:181,1:942	chr2R	-	1996055119960550	1996164619961640
407	Ptp10D	chrX:11567366:11567494:+@chrX:11569364:11569672:+	ri	0.19	0.14	0.26	0.07	0.05	0.09	0.12	1629.07	'chrX:11567366:11567494:+@chrX:11569364:11569672:+.A.withRI','chrX:11567366:11567494:+@chrX:11569364:11569672:+.B.up_chrX:11567366:11567494:+@chrX:11569364:11569672:+.B.dn'	(0,0):46,(0,1):12,(1,0):75,(1,1):37	0:79,1:45	(0,0):77,(0,1):55,(1,0):82,(1,1):85	0:88,1:134	chrX	+	1156736611567360	1156967211569670
408	CG3609	chr2L:2372830:2373076:-@chr2L:2372448:2372743:-	ri	0.42	0.39	0.46	0.29	0.27	0.31	0.13	1000000000000	'chr2L:2372830:2373076:-@chr2L:2372448:2372743:-.A.withRI','chr2L:2372830:2373076:-@chr2L:2372448:2372743:-.B.dn_chr2L:2372830:2373076:-@chr2L:2372448:2372743:-.B.up'	(0,0):1210,(0,1):99,(1,0):519,(1,1):1964	0:1253,1:1329	(0,0):1766,(0,1):113,(1,0):551,(1,1):2856	0:1248,1:2272	chr2L	-	23724482372448	23730762373076
409	Gfat1	chr3RHet:2480187:2481026|2480985:+@chr3RHet:2481086:2481658:+	a5ss	0.98	0.96	1	0.85	0.8	0.89	0.13	4.52697e+11	'chr3RHet:2480187:2481026|2480985:+@chr3RHet:2481086:2481658:+.A.coreAndExt_chr3RHet:2480187:2481026|2480985:+@chr3RHet:2481086:2481658:+.A.dn','chr3RHet:2480187:2481026|2480985:+@chr3RHet:2481086:2481658:+.B.core_chr3RHet:2480187:2481026|2480985:+@chr3RHet:2481086:2481658:+.B.dn'	(0,0):110,(1,0):240,(1,1):1657	0:1824,1:73	(0,0):193,(0,1):10,(1,0):323,(1,1):3081	0:2940,1:474	chr3RHet	+	24801872480187	24816582481658
410	alph	chr3R:25417632:25417889:+@chr3R:25422963:25423068:+	ri	0.29	0.25	0.35	0.16	0.14	0.18	0.13	2.11168e+08	'chr3R:25417632:25417889:+@chr3R:25422963:25423068:+.A.withRI','chr3R:25417632:25417889:+@chr3R:25422963:25423068:+.B.up_chr3R:25417632:25417889:+@chr3R:25422963:25423068:+.B.dn'	(0,0):749,(0,1):2,(1,0):1231,(1,1):137	0:1269,1:101	(0,0):1232,(0,1):2,(1,0):1445,(1,1):297	0:1498,1:246	chr3R	+	2541763225417630	2542306825423060
411	alph	chr3R:25423141:25423195:+@chr3R:25423498:25423630:+@chr3R:25423886:25424025:+	se	0.25	0.2	0.3	0.12	0.1	0.14	0.13	4.41804e+07	'chr3R:25423141:25423195:+@chr3R:25423498:25423630:+@chr3R:25423886:25424025:+.A.up_chr3R:25423141:25423195:+@chr3R:25423498:25423630:+@chr3R:25423886:25424025:+.A.se_chr3R:25423141:25423195:+@chr3R:25423498:25423630:+@chr3R:25423886:25424025:+.A.dn','chr3R:25423141:25423195:+@chr3R:25423498:25423630:+@chr3R:25423886:25424025:+.B.up_chr3R:25423141:25423195:+@chr3R:25423498:25423630:+@chr3R:254238…	(0,0):203,(0,1):75,(1,0):127,(1,1):49	0:138,1:113	(0,0):331,(0,1):224,(1,0):173,(1,1):190	0:198,1:389	chr3R	+	2542314125423140	2542402525424020
412	up	chrX:13490541:13490781:-@chrX:13489353:13489505:-	ri	0.31	0.3	0.33	0.17	0.17	0.17	0.14	1000000000000	'chrX:13490541:13490781:-@chrX:13489353:13489505:-.A.withRI','chrX:13490541:13490781:-@chrX:13489353:13489505:-.B.dn_chrX:13490541:13490781:-@chrX:13489353:13489505:-.B.up'	(0,0):12108,(0,1):109,(1,0):7853,(1,1):4536	0:9276,1:3222	(0,0):28359,(0,1):184,(1,0):12912,(1,1):13894	0:15308,1:11682	chrX	-	1348935313489350	1349078113490780
413	RFeSP	chr2L:1613040:1613423:-@chr2L:1612495:1612988:-	ri	0.14	0.11	0.16	0	0	0	0.14	1000000000000	'chr2L:1613040:1613423:-@chr2L:1612495:1612988:-.A.withRI','chr2L:1613040:1613423:-@chr2L:1612495:1612988:-.B.dn_chr2L:1613040:1613423:-@chr2L:1612495:1612988:-.B.up'	(0,0):1166,(0,1):72,(1,0):105,(1,1):4343	0:633,1:3887	(0,0):1359,(0,1):149,(1,0):1,(1,1):8986	0:19,1:9117	chr2L	-	16124951612495	16134231613423
414	AnxB9	chr3R:16895035:16895382:+@chr3R:16896000:16896420:+	ri	0.2	0.18	0.23	0.06	0.05	0.07	0.14	1000000000000	'chr3R:16895035:16895382:+@chr3R:16896000:16896420:+.A.withRI','chr3R:16895035:16895382:+@chr3R:16896000:16896420:+.B.up_chr3R:16895035:16895382:+@chr3R:16896000:16896420:+.B.dn'	(0,0):484,(0,1):1,(1,0):254,(1,1):1171	0:486,1:940	(0,0):485,(1,0):104,(1,1):1668	0:203,1:1569	chr3R	+	1689503516895030	1689642016896420
415	Ptp10D	chrX:11567366:11568935|11567494:+@chrX:11569364:11569672:+	a5ss	0.22	0.16	0.3	0.07	0.05	0.09	0.15	423269	'chrX:11567366:11568935|11567494:+@chrX:11569364:11569672:+.A.coreAndExt_chrX:11567366:11568935|11567494:+@chrX:11569364:11569672:+.A.dn','chrX:11567366:11568935|11567494:+@chrX:11569364:11569672:+.B.core_chrX:11567366:11568935|11567494:+@chrX:11569364:11569672:+.B.dn'	(0,0):51,(0,1):12,(1,0):70,(1,1):37	0:79,1:40	(0,0):95,(0,1):55,(1,0):64,(1,1):85	0:70,1:134	chrX	+	1156736611567360	1156967211569670
416	eEF1delta	chr2L:10232278:10232659:+@chr2L:10233481:10233561:+@chr2L:10233757:10234539:+	se	0.69	0.66	0.71	0.54	0.52	0.56	0.15	1000000000000	'chr2L:10232278:10232659:+@chr2L:10233481:10233561:+@chr2L:10233757:10234539:+.A.up_chr2L:10232278:10232659:+@chr2L:10233481:10233561:+@chr2L:10233757:10234539:+.A.se_chr2L:10232278:10232659:+@chr2L:10233481:10233561:+@chr2L:10233757:10234539:+.A.dn','chr2L:10232278:10232659:+@chr2L:10233481:10233561:+@chr2L:10233757:10234539:+.B.up_chr2L:10232278:10232659:+@chr2L:10233481:10233561:+@chr2L:102337…	(0,0):112,(0,1):341,(1,0):1619,(1,1):5182	0:4932,1:2210	(0,0):136,(0,1):527,(1,0):1452,(1,1):7241	0:5207,1:4013	chr2L	+	1023227810232270	1023453910234530
[truncated: 47 more rows]

## Sheet: SMN_only
Supplemental Table S10: SmnX7/D-specific splicing changes.
gene	event_name	type	oregonR_posterior_mean	oregonR_ci_low	oregonR_ci_high	smn_posterior_mean	smn_ci_low	smn_ci_high	diff	bayes_factor	isoforms	oregonR_counts	oregonR_assigned_counts	smn_counts	smn_assigned_counts	chrom	strand	mRNA_starts	mRNA_ends
[truncated: 247 more rows]

## Sheet: Ars2_only
Supplemental Table S11: Ars2C/E-specific splicing changes.
gene	event_name	type	oregonR_posterior_mean	oregonR_ci_low	oregonR_ci_high	smn_posterior_mean	smn_ci_low	smn_ci_high	diff	bayes_factor	isoforms	oregonR_counts	oregonR_assigned_counts	smn_counts	smn_assigned_counts	chrom	strand	mRNA_starts	mRNA_ends
[truncated: 1,296 more rows]
