# Supplementary material
Source: HighWire-hosted journal article supplement (doi:10.1101/rna.057208.116)
Supplement: Supplemental_Tables_S13-S16.xlsx [file Supplemental_Tables_S13-S16.xlsx]

## Sheet: shared
Supplemental Table S13: Overlapping splicing pattern changes in Smn missense mutant lines.
	gene	event_name	type	WT_posterior_mean	WT_ci_low	WT_ci_high	V72G_posterior_mean	V72G_ci_low	V72G_ci_high	diff	bayes_factor	isoforms	WT_counts	WT_assigned_counts	V72G_counts	V72G_assigned_counts	chrom	strand	mRNA_starts	mRNA_ends
1	scaf	chr2R:1572309:1572482:-@chr2R:1567271:1568022:-	ri	0.11	0.09	0.13	0.72	0.66	0.77	-0.61	1000000000000	'chr2R:1572309:1572482:-@chr2R:1567271:1568022:-.A.withRI','chr2R:1572309:1572482:-@chr2R:1567271:1568022:-.B.dn_chr2R:1572309:1572482:-@chr2R:1567271:1568022:-.B.up'	(0,0):77,(0,1):42,(1,0):189,(1,1):249	0:221,1:259	(0,0):195,(0,1):35,(1,0):1978,(1,1):323	0:2224,1:112	chr2R	-	15672711567271	15724821572482
2	PAPLA1, CG43394	chr2L:8157062:8157256:+@chr2L:8157537:8157948:+	ri	0.16	0.08	0.27	0.65	0.47	0.8	-0.49	5.89867e+08	'chr2L:8157062:8157256:+@chr2L:8157537:8157948:+.A.withRI','chr2L:8157062:8157256:+@chr2L:8157537:8157948:+.B.up_chr2L:8157062:8157256:+@chr2L:8157537:8157948:+.B.dn'	(0,0):14,(0,1):16,(1,0):7,(1,1):24	0:11,1:36	(0,0):10,(0,1):6,(1,0):25,(1,1):14	0:34,1:11	chr2L	+	81570628157062	81579488157948
3	Hsc70Cb	chr3L:14030355:14030521:+@chr3L:14030578:14030850:+	ri	0.29	0.11	0.55	0.77	0.58	0.94	-0.48	35.77	'chr3L:14030355:14030521:+@chr3L:14030578:14030850:+.A.withRI','chr3L:14030355:14030521:+@chr3L:14030578:14030850:+.B.up_chr3L:14030355:14030521:+@chr3L:14030578:14030850:+.B.dn'	(0,0):49,(1,0):7,(1,1):114	0:35,1:86	(0,0):57,(1,0):38,(1,1):171	0:166,1:43	chr3L	+	1403035514030350	1403085014030850
4	Dscam1	chr2R:3213657:3213869:-@chr2R:3212087:3212233:-	ri	0.25	0.12	0.45	0.73	0.38	0.98	-0.48	7.53	'chr2R:3213657:3213869:-@chr2R:3212087:3212233:-.A.withRI','chr2R:3213657:3213869:-@chr2R:3212087:3212233:-.B.dn_chr2R:3213657:3213869:-@chr2R:3212087:3212233:-.B.up'	(0,0):10,(0,1):3,(1,0):20,(1,1):7	0:21,1:9	(0,0):12,(1,0):21,(1,1):1	0.0152778	chr2R	-	32120873212087	32138693213869
5	Victoria, sick, TotF	chr2L:19908939:19918585|19910432:+@chr2L:19925383:19925942:+	a5ss	0.27	0.21	0.32	0.72	0.65	0.8	-0.45	1000000000000	'chr2L:19908939:19918585|19910432:+@chr2L:19925383:19925942:+.A.coreAndExt_chr2L:19908939:19918585|19910432:+@chr2L:19925383:19925942:+.A.dn','chr2L:19908939:19918585|19910432:+@chr2L:19925383:19925942:+.B.core_chr2L:19908939:19918585|19910432:+@chr2L:19925383:19925942:+.B.dn'	(0,0):125,(0,1):15,(1,0):179,(1,1):130	0:210,1:114	(0,0):246,(0,1):16,(1,0):857,(1,1):201	0:982,1:92	chr2L	+	1990893919908930	1992594219925940
6	Hsc70Cb	chr3L:14030355:14030512:+@chr3L:14030578:14030850:+	ri	0.26	0.12	0.47	0.7	0.5	0.88	-0.44	25.86	'chr3L:14030355:14030512:+@chr3L:14030578:14030850:+.A.withRI','chr3L:14030355:14030512:+@chr3L:14030578:14030850:+.B.up_chr3L:14030355:14030512:+@chr3L:14030578:14030850:+.B.dn'	(0,0):49,(1,0):7,(1,1):114	0:47,1:74	(0,0):57,(1,0):39,(1,1):170	0:145,1:64	chr3L	+	1403035514030350	1403085014030850
7	Hsc70Cb	chr3L:14030355:14030502:+@chr3L:14030578:14030850:+	ri	0.24	0.11	0.44	0.66	0.45	0.86	-0.42	17.91	'chr3L:14030355:14030502:+@chr3L:14030578:14030850:+.A.withRI','chr3L:14030355:14030502:+@chr3L:14030578:14030850:+.B.up_chr3L:14030355:14030502:+@chr3L:14030578:14030850:+.B.dn'	(0,0):49,(1,0):8,(1,1):113	0:37,1:84	(0,0):57,(1,0):41,(1,1):168	0:132,1:77	chr3L	+	1403035514030350	1403085014030850
8	Oatp30B	chr2L:9521219:9521440|9521246:+@chr2L:9523163:9523343:+	a5ss	0.35	0.24	0.49	0.71	0.49	0.93	-0.36	7.9	'chr2L:9521219:9521440|9521246:+@chr2L:9523163:9523343:+.A.coreAndExt_chr2L:9521219:9521440|9521246:+@chr2L:9523163:9523343:+.A.dn','chr2L:9521219:9521440|9521246:+@chr2L:9523163:9523343:+.B.core_chr2L:9521219:9521440|9521246:+@chr2L:9523163:9523343:+.B.dn'	(0,0):158,(0,1):8,(1,0):64,(1,1):35	0:76,1:31	(0,0):241,(1,0):110,(1,1):42	0:145,1:7	chr2L	+	95212199521219	95233439523343
9	Oatp30B	chr2L:9521219:9521495|9521246:+@chr2L:9523163:9523343:+	a5ss	0.33	0.23	0.45	0.62	0.43	0.83	-0.29	7.62	'chr2L:9521219:9521495|9521246:+@chr2L:9523163:9523343:+.A.coreAndExt_chr2L:9521219:9521495|9521246:+@chr2L:9523163:9523343:+.A.dn','chr2L:9521219:9521495|9521246:+@chr2L:9523163:9523343:+.B.core_chr2L:9521219:9521495|9521246:+@chr2L:9523163:9523343:+.B.dn'	(0,0):146,(0,1):8,(1,0):76,(1,1):35	0:101,1:18	(0,0):229,(1,0):122,(1,1):42	0:155,1:9	chr2L	+	95212199521219	95233439523343
10	PhKgamma	chrX:11589857:11590344|11589972:+@chrX:11590436:11590573:+	a5ss	0.28	0.19	0.38	0.54	0.37	0.73	-0.26	4.12	'chrX:11589857:11590344|11589972:+@chrX:11590436:11590573:+.A.coreAndExt_chrX:11589857:11590344|11589972:+@chrX:11590436:11590573:+.A.dn','chrX:11589857:11590344|11589972:+@chrX:11590436:11590573:+.B.core_chrX:11589857:11590344|11589972:+@chrX:11590436:11590573:+.B.dn'	(0,0):62,(0,1):23,(1,0):52,(1,1):1	0:53,1:23	(0,0):66,(0,1):9,(1,0):60,(1,1):1	0:61,1:9	chrX	+	1158985711589850	1159057311590570
11	PhKgamma	chrX:11589857:11589972:+@chrX:11590436:11590573:+	ri	0.24	0.16	0.33	0.49	0.34	0.67	-0.25	6.22	'chrX:11589857:11589972:+@chrX:11590436:11590573:+.A.withRI','chrX:11589857:11589972:+@chrX:11590436:11590573:+.B.up_chrX:11589857:11589972:+@chrX:11590436:11590573:+.B.dn'	(0,0):61,(0,1):23,(1,0):53,(1,1):1	0:53,1:24	(0,0):61,(0,1):9,(1,0):65,(1,1):1	0:65,1:10	chrX	+	1158985711589850	1159057311590570
12	Sfmbt	chr2L:13175667:13175952:-@chr2L:13174439:13175276:-@chr2L:13172643:13173941:-	se	0.36	0.27	0.48	0.6	0.47	0.75	-0.24	6.57	'chr2L:13175667:13175952:-@chr2L:13174439:13175276:-@chr2L:13172643:13173941:-.A.dn_chr2L:13175667:13175952:-@chr2L:13174439:13175276:-@chr2L:13172643:13173941:-.A.se_chr2L:13175667:13175952:-@chr2L:13174439:13175276:-@chr2L:13172643:13173941:-.A.up','chr2L:13175667:13175952:-@chr2L:13174439:13175276:-@chr2L:13172643:13173941:-.B.dn_chr2L:13175667:13175952:-@chr2L:13174439:13175276:-@chr2L:131726…	(0,0):28,(0,1):3,(1,0):48,(1,1):209	0:123,1:137	(0,0):32,(0,1):5,(1,0):82,(1,1):197	0:207,1:77	chr2L	-	1317264313172640	1317595213175950
13	CG31323	chr3R:21996570:21997177|21996760:+@chr3R:22009522:22009686:+	a5ss	0.62	0.46	0.77	0.84	0.74	0.94	-0.22	3.78	'chr3R:21996570:21997177|21996760:+@chr3R:22009522:22009686:+.A.coreAndExt_chr3R:21996570:21997177|21996760:+@chr3R:22009522:22009686:+.A.dn','chr3R:21996570:21997177|21996760:+@chr3R:22009522:22009686:+.B.core_chr3R:21996570:21997177|21996760:+@chr3R:22009522:22009686:+.B.dn'	(0,0):190,(0,1):8,(1,0):55,(1,1):5	0:57,1:11	(0,0):402,(0,1):6,(1,0):133,(1,1):7	0:138,1:8	chr3R	+	2199657021996570	2200968622009680
14	CG44253	chr2R:18944932:18945156:+@chr2R:18946578:18946816:+	ri	0.05	0.04	0.08	0.27	0.18	0.38	-0.22	9.64887e+06	'chr2R:18944932:18945156:+@chr2R:18946578:18946816:+.A.withRI','chr2R:18944932:18945156:+@chr2R:18946578:18946816:+.B.up_chr2R:18944932:18945156:+@chr2R:18946578:18946816:+.B.dn'	(0,0):39,(0,1):37,(1,0):26,(1,1):47	0:27,1:83	(0,0):46,(0,1):13,(1,0):67,(1,1):29	0:76,1:33	chr2R	+	1894493218944930	1894681618946810
15	Oatp30B	chr2L:9521219:9521395|9521246:+@chr2L:9523163:9523343:+	a5ss	0.14	0.07	0.22	0.32	0.21	0.47	-0.18	4.95	'chr2L:9521219:9521395|9521246:+@chr2L:9523163:9523343:+.A.coreAndExt_chr2L:9521219:9521395|9521246:+@chr2L:9523163:9523343:+.A.dn','chr2L:9521219:9521395|9521246:+@chr2L:9523163:9523343:+.B.core_chr2L:9521219:9521395|9521246:+@chr2L:9523163:9523343:+.B.dn'	(0,0):206,(0,1):8,(1,0):16,(1,1):35	0:22,1:37	(0,0):317,(1,0):34,(1,1):42	0:52,1:24	chr2L	+	95212199521219	95233439523343
16	Sirup	chr2L:7998934:7999169|7998997:+@chr2L:7999249:7999743:+	a5ss	0.81	0.74	0.87	0.99	0.98	1	-0.18	1000000000000	'chr2L:7998934:7999169|7998997:+@chr2L:7999249:7999743:+.A.coreAndExt_chr2L:7998934:7999169|7998997:+@chr2L:7999249:7999743:+.A.dn','chr2L:7998934:7999169|7998997:+@chr2L:7999249:7999743:+.B.core_chr2L:7998934:7999169|7998997:+@chr2L:7999249:7999743:+.B.dn'	(0,0):455,(1,0):673,(1,1):1749	0:2111,1:311	(0,0):534,(1,0):1201,(1,1):2047	0:3234,1:14	chr2L	+	79989347998934	79997437999743
17	CG18659	chr2R:5018988:5019477:-@chr2R:5018669:5018863:-	ri	0.08	0.02	0.17	0.26	0.17	0.37	-0.18	6.09	'chr2R:5018988:5019477:-@chr2R:5018669:5018863:-.A.withRI','chr2R:5018988:5019477:-@chr2R:5018669:5018863:-.B.dn_chr2R:5018988:5019477:-@chr2R:5018669:5018863:-.B.up'	(0,0):14,(0,1):14,(1,0):3,(1,1):68	0:5,1:80	(0,0):21,(0,1):27,(1,0):23,(1,1):121	0:50,1:121	chr2R	-	50186695018669	50194775019477
18	RpL36A	chr2L:8042469:8042613:-@chr2L:8041771:8042125:-	ri	0.24	0.23	0.25	0.36	0.34	0.37	-0.12	1000000000000	'chr2L:8042469:8042613:-@chr2L:8041771:8042125:-.A.withRI','chr2L:8042469:8042613:-@chr2L:8041771:8042125:-.B.dn_chr2L:8042469:8042613:-@chr2L:8041771:8042125:-.B.up'	(0,0):5272,(0,1):1515,(1,0):1344,(1,1):1194	0:1607,1:2446	(0,0):5641,(0,1):1342,(1,0):2087,(1,1):1232	0:2558,1:2103	chr2L	-	80417718041771	80426138042613
19	CG13377	chrX:157701:158061:-@chrX:152926:153704:-	ri	0.22	0.2	0.25	0.3	0.26	0.34	-0.08	5.02	'chrX:157701:158061:-@chrX:152926:153704:-.A.withRI','chrX:157701:158061:-@chrX:152926:153704:-.B.dn_chrX:157701:158061:-@chrX:152926:153704:-.B.up'	(0,0):64,(0,1):52,(1,0):461,(1,1):404	0:568,1:349	(0,0):55,(0,1):28,(1,0):441,(1,1):299	0:534,1:234	chrX	-	152926152926	158061158061
20	Osi14	chr3R:2125681:2125886:+@chr3R:2125941:2126730:+	ri	0.06	0.04	0.08	0.14	0.11	0.16	-0.08	2.69653e+10	'chr3R:2125681:2125886:+@chr3R:2125941:2126730:+.A.withRI','chr3R:2125681:2125886:+@chr3R:2125941:2126730:+.B.up_chr3R:2125681:2125886:+@chr3R:2125941:2126730:+.B.dn'	(0,0):360,(0,1):405,(1,0):50,(1,1):2724	0:223,1:2956	(0,0):344,(0,1):336,(1,0):102,(1,1):2301	0:397,1:2342	chr3R	+	21256812125681	21267302126730
21	RpL36A	chr2L:8042440:8042613:-@chr2L:8041771:8042125:-	ri	0.07	0.07	0.08	0.13	0.13	0.14	-0.06	1000000000000	'chr2L:8042440:8042613:-@chr2L:8041771:8042125:-.A.withRI','chr2L:8042440:8042613:-@chr2L:8041771:8042125:-.B.dn_chr2L:8042440:8042613:-@chr2L:8041771:8042125:-.B.up'	(0,0):2460,(0,1):4327,(1,0):768,(1,1):1770	0:883,1:5982	(0,0):2734,(0,1):4249,(1,0):1482,(1,1):1837	0:1729,1:5839	chr2L	-	80417718041771	80426138042613
22	CG5080	chr2L:1163000:1163149:-@chr2L:1161927:1162146:-	ri	0.03	0.03	0.04	0.07	0.05	0.08	-0.04	2783.65	'chr2L:1163000:1163149:-@chr2L:1161927:1162146:-.A.withRI','chr2L:1163000:1163149:-@chr2L:1161927:1162146:-.B.dn_chr2L:1163000:1163149:-@chr2L:1161927:1162146:-.B.up'	(0,0):281,(0,1):350,(1,0):93,(1,1):124	0:101,1:466	(0,0):196,(0,1):188,(1,0):111,(1,1):104	0:119,1:284	chr2L	-	11619271161927	11631491163149
23	RpS26	chr2L:18443153:18443200:-@chr2L:18442505:18443070:-	ri	0	0	0.01	0.02	0.02	0.03	-0.02	9.1204e+07	'chr2L:18443153:18443200:-@chr2L:18442505:18443070:-.A.withRI','chr2L:18443153:18443200:-@chr2L:18442505:18443070:-.B.dn_chr2L:18443153:18443200:-@chr2L:18442505:18443070:-.B.up'	(0,0):704,(0,1):605,(1,0):6,(1,1):4212	0:26,1:4797	(0,0):697,(0,1):598,(1,0):39,(1,1):4738	0:135,1:5240	chr2L	-	1844250518442500	1844320018443200
24	Hsp83	chr3L:3192969:3193367:+@chr3L:3194499:3197061:+	ri	0.03	0.03	0.04	0.02	0.02	0.02	0.01	1805.64	'chr3L:3192969:3193367:+@chr3L:3194499:3197061:+.A.withRI','chr3L:3192969:3193367:+@chr3L:3194499:3197061:+.B.up_chr3L:3192969:3193367:+@chr3L:3194499:3197061:+.B.dn'	(0,0):191,(0,1):1420,(1,0):293,(1,1):17134	0:844,1:18003	(0,0):255,(0,1):2058,(1,0):247,(1,1):21995	0:721,1:23579	chr3L	+	31929693192969	31970613197061
25	CG34401	chrX:18758872:18759752:+@chrX:18765667:18765906:+	ri	0.11	0.09	0.14	0.05	0.04	0.06	0.06	6213.55	'chrX:18758872:18759752:+@chrX:18765667:18765906:+.A.withRI','chrX:18758872:18759752:+@chrX:18765667:18765906:+.B.up_chrX:18758872:18759752:+@chrX:18765667:18765906:+.B.dn'	(0,0):33,(0,1):12,(1,0):143,(1,1):188	0:161,1:182	(0,0):32,(0,1):8,(1,0):73,(1,1):228	0:82,1:227	chrX	+	1875887218758870	1876590618765900
26	RpS20	chr3R:16648524:16648581:+@chr3R:16648854:16649080:+	ri	0.42	0.39	0.45	0.34	0.32	0.37	0.08	67.69	'chr3R:16648524:16648581:+@chr3R:16648854:16649080:+.A.withRI','chr3R:16648524:16648581:+@chr3R:16648854:16649080:+.B.up_chr3R:16648524:16648581:+@chr3R:16648854:16649080:+.B.dn'	(0,0):1919,(0,1):198,(1,0):1115,(1,1):468	0:1305,1:476	(0,0):2200,(0,1):219,(1,0):985,(1,1):576	0:1193,1:587	chr3R	+	1664852416648520	1664908016649080
27	scaf	chr2R:1579157:1579226:-@chr2R:1575181:1575543:-	ri	0.13	0.1	0.15	0.04	0.04	0.05	0.09	1000000000000	'chr2R:1579157:1579226:-@chr2R:1575181:1575543:-.A.withRI','chr2R:1579157:1579226:-@chr2R:1575181:1575543:-.B.dn_chr2R:1579157:1579226:-@chr2R:1575181:1575543:-.B.up'	(0,0):32,(0,1):44,(1,0):232,(1,1):67	0:244,1:99	(0,0):109,(0,1):102,(1,0):218,(1,1):227	0:228,1:319	chr2R	-	15751811575181	15792261579226
28	kermit	chr2R:4043560:4044232:-@chr2R:4034422:4035900:-	ri	0.19	0.16	0.22	0.07	0.06	0.08	0.12	1000000000000	'chr2R:4043560:4044232:-@chr2R:4034422:4035900:-.A.withRI','chr2R:4043560:4044232:-@chr2R:4034422:4035900:-.B.dn_chr2R:4043560:4044232:-@chr2R:4034422:4035900:-.B.up'	(0,0):39,(0,1):14,(1,0):299,(1,1):379	0:371,1:321	(0,0):55,(0,1):29,(1,0):175,(1,1):606	0:220,1:590	chr2R	-	40344224034422	40442324044232
29	CG34396	chr2R:16981261:16981417:+@chr2R:16987720:16988996:+	ri	0.23	0.18	0.3	0.09	0.07	0.1	0.14	3.11408e+09	'chr2R:16981261:16981417:+@chr2R:16987720:16988996:+.A.withRI','chr2R:16981261:16981417:+@chr2R:16987720:16988996:+.B.up_chr2R:16981261:16981417:+@chr2R:16987720:16988996:+.B.dn'	(0,0):15,(0,1):7,(1,0):127,(1,1):98	0:161,1:71	(0,0):51,(0,1):57,(1,0):175,(1,1):333	0:200,1:365	chr2R	+	1698126116981260	1698899616988990
30	CG4038, CG34396	chr2R:16981261:16987570|16981417:+@chr2R:16987720:16988996:+	a5ss	0.25	0.19	0.32	0.09	0.07	0.1	0.16	1.12569e+10	'chr2R:16981261:16987570|16981417:+@chr2R:16987720:16988996:+.A.coreAndExt_chr2R:16981261:16987570|16981417:+@chr2R:16987720:16988996:+.A.dn','chr2R:16981261:16987570|16981417:+@chr2R:16987720:16988996:+.B.core_chr2R:16981261:16987570|16981417:+@chr2R:16987720:16988996:+.B.dn'	(0,0):11,(0,1):7,(1,0):131,(1,1):98	0:156,1:80	(0,0):50,(0,1):57,(1,0):176,(1,1):333	0:200,1:366	chr2R	+	1698126116981260	1698899616988990
31	fry	chr3L:9660802:9660984:-@chr3L:9657177:9657344:-	ri	0.24	0.18	0.32	0.06	0.04	0.09	0.18	146971	'chr3L:9660802:9660984:-@chr3L:9657177:9657344:-.A.withRI','chr3L:9660802:9660984:-@chr3L:9657177:9657344:-.B.dn_chr3L:9660802:9660984:-@chr3L:9657177:9657344:-.B.up'	(0,0):58,(0,1):20,(1,0):215,(1,1):13	0:219,1:29	(0,0):57,(0,1):32,(1,0):58,(1,1):10	0:59,1:41	chr3L	-	96571779657177	96609849660984
32	dl	chr2L:17437419:17438017:-@chr2L:17436830:17437323:-	ri	0.36	0.23	0.52	0.13	0.07	0.2	0.23	15.89	'chr2L:17437419:17438017:-@chr2L:17436830:17437323:-.A.withRI','chr2L:17437419:17438017:-@chr2L:17436830:17437323:-.B.dn_chr2L:17437419:17438017:-@chr2L:17436830:17437323:-.B.up'	(0,0):5,(0,1):9,(1,0):15,(1,1):148	0:51,1:121	(0,0):20,(0,1):41,(1,0):13,(1,1):329	0:29,1:354	chr2L	-	1743683017436830	1743801717438010
33	Tif-IA	chr2L:22250545:22250853:+@chr2L:22253746:22253921:+	ri	0.48	0.33	0.68	0.24	0.19	0.3	0.24	11.86	'chr2L:22250545:22250853:+@chr2L:22253746:22253921:+.A.withRI','chr2L:22250545:22250853:+@chr2L:22253746:22253921:+.B.up_chr2L:22250545:22250853:+@chr2L:22253746:22253921:+.B.dn'	(0,0):111,(1,0):156,(1,1):33	0:168,1:21	(0,0):141,(0,1):1,(1,0):215,(1,1):89	0:246,1:59	chr2L	+	2225054522250540	2225392122253920
34	Axn	chr3R:25857145:25857834:+@chr3R:25858653:25858749:+	ri	0.37	0.2	0.6	0.12	0.05	0.2	0.25	6.49	'chr3R:25857145:25857834:+@chr3R:25858653:25858749:+.A.withRI','chr3R:25857145:25857834:+@chr3R:25858653:25858749:+.B.up_chr3R:25857145:25857834:+@chr3R:25858653:25858749:+.B.dn'	(0,0):26,(0,1):1,(1,0):18,(1,1):35	0:37,1:17	(0,0):40,(1,0):8,(1,1):60	0:15,1:53	chr3R	+	2585714525857140	2585874925858740
35	CG31224	chr3R:14485019:14484976|14484482:-@chr3R:14481887:14482907:-	a5ss	0.77	0.6	0.91	0.51	0.42	0.61	0.26	4.78	'chr3R:14485019:14484976|14484482:-@chr3R:14481887:14482907:-.A.dn_chr3R:14485019:14484976|14484482:-@chr3R:14481887:14482907:-.A.coreAndExt','chr3R:14485019:14484976|14484482:-@chr3R:14481887:14482907:-.B.dn_chr3R:14485019:14484976|14484482:-@chr3R:14481887:14482907:-.B.core'	(0,0):80,(1,0):80,(1,1):183	0:215,1:48	(0,0):96,(0,1):23,(1,0):94,(1,1):195	0:193,1:119	chr3R	-	1448188714481880	1448501914485010
36	mura	chr3R:5375381:5375532:-@chr3R:5372520:5373092:-	ri	0.87	0.69	0.99	0.59	0.47	0.73	0.28	5.37	'chr3R:5375381:5375532:-@chr3R:5372520:5373092:-.A.withRI','chr3R:5375381:5375532:-@chr3R:5372520:5373092:-.B.dn_chr3R:5375381:5375532:-@chr3R:5372520:5373092:-.B.up'	(0,0):64,(1,0):322,(1,1):86	0:399,1:9	(0,0):68,(1,0):296,(1,1):121	0:356,1:61	chr3R	-	53725205372520	53755325375532
37	Dg	chr2R:11974436:11975230:-@chr2R:11973732:11973798:-	ri	0.48	0.32	0.68	0.18	0.1	0.29	0.3	15.6	'chr2R:11974436:11975230:-@chr2R:11973732:11973798:-.A.withRI','chr2R:11974436:11975230:-@chr2R:11973732:11973798:-.B.dn_chr2R:11974436:11975230:-@chr2R:11973732:11973798:-.B.up'	(0,0):22,(0,1):3,(1,0):28,(1,1):54	0:51,1:34	(0,0):31,(0,1):2,(1,0):16,(1,1):92	0:25,1:85	chr2R	-	1197373211973730	1197523011975230
38	wech	chr2R:3375961:3376252:-@chr2R:3373390:3373672:-	ri	0.52	0.38	0.66	0.21	0.14	0.32	0.31	35.44	'chr2R:3375961:3376252:-@chr2R:3373390:3373672:-.A.withRI','chr2R:3375961:3376252:-@chr2R:3373390:3373672:-.B.dn_chr2R:3375961:3376252:-@chr2R:3373390:3373672:-.B.up'	(0,0):10,(0,1):7,(1,0):142,(1,1):28	0:157,1:20	(0,0):8,(0,1):5,(1,0):44,(1,1):30	0:52,1:27	chr2R	-	33733903373390	33762523376252
39	lt	chr2L:22820170:22820497:+@chr2L:22831506:22831574:+@chr2L:22832086:22832272:+	se	0.8	0.56	0.97	0.43	0.27	0.61	0.37	6.44	'chr2L:22820170:22820497:+@chr2L:22831506:22831574:+@chr2L:22832086:22832272:+.A.up_chr2L:22820170:22820497:+@chr2L:22831506:22831574:+@chr2L:22832086:22832272:+.A.se_chr2L:22820170:22820497:+@chr2L:22831506:22831574:+@chr2L:22832086:22832272:+.A.dn','chr2L:22820170:22820497:+@chr2L:22831506:22831574:+@chr2L:22832086:22832272:+.B.up_chr2L:22820170:22820497:+@chr2L:22831506:22831574:+@chr2L:228320…	(0,0):500,(1,0):24,(1,1):127	0:108,1:43	(0,0):597,(0,1):4,(1,0):20,(1,1):157	0:101,1:80	chr2L	+	2282017022820170	2283227222832270
40	yin	chrX:3760545:3760750:-@chrX:3759391:3759472:-	ri	0.76	0.48	0.95	0.32	0.16	0.54	0.44	16.1	'chrX:3760545:3760750:-@chrX:3759391:3759472:-.A.withRI','chrX:3760545:3760750:-@chrX:3759391:3759472:-.B.dn_chrX:3760545:3760750:-@chrX:3759391:3759472:-.B.up'	(0,0):21,(1,0):75,(1,1):6	0:80,1:1	(0,0):8,(0,1):3,(1,0):27,(1,1):5	0:29,1:6	chrX	-	37593913759391	37607503760750
41	RhoGEF2	chr2R:12914830:12914844:+@chr2R:12916178:12916526:+	ri	0.84	0.73	0.94	0.13	0.1	0.17	0.71	1000000000000	'chr2R:12914830:12914844:+@chr2R:12916178:12916526:+.A.withRI','chr2R:12914830:12914844:+@chr2R:12916178:12916526:+.B.up_chr2R:12914830:12914844:+@chr2R:12916178:12916526:+.B.dn'	(0,0):58,(0,1):5,(1,0):803,(1,1):81	0:872,1:17	(0,0):68,(0,1):9,(1,0):103,(1,1):88	0:113,1:87	chr2R	+	1291483012914830	1291652612916520
42	RhoGEF2	chr2R:12914830:12914940:+@chr2R:12916178:12916526:+	ri	0.97	0.93	1	0.26	0.19	0.34	0.71	1000000000000	'chr2R:12914830:12914940:+@chr2R:12916178:12916526:+.A.withRI','chr2R:12914830:12914940:+@chr2R:12916178:12916526:+.B.up_chr2R:12914830:12914940:+@chr2R:12916178:12916526:+.B.dn'	(0,0):62,(0,1):1,(1,0):802,(1,1):82	0:883,1:2	(0,0):77,(1,0):103,(1,1):88	0:130,1:61	chr2R	+	1291483012914830	1291652612916520
	gene	event_name	type	WT_posterior_mean	WT_ci_low	WT_ci_high	Y107C_posterior_mean	Y107C_ci_low	Y107C_ci_high	diff	bayes_factor	isoforms	WT_counts	WT_assigned_counts	Y107C_counts	Y107C_assigned_counts	chrom	strand	mRNA_starts	mRNA_ends
1	Victoria, sick, TotF	chr2L:19908939:19918585|19910432:+@chr2L:19925383:19925942:+	a5ss	0.27	0.21	0.32	0.79	0.71	0.87	-0.52	1000000000000	'chr2L:19908939:19918585|19910432:+@chr2L:19925383:19925942:+.A.coreAndExt_chr2L:19908939:19918585|19910432:+@chr2L:19925383:19925942:+.A.dn','chr2L:19908939:19918585|19910432:+@chr2L:19925383:19925942:+.B.core_chr2L:19908939:19918585|19910432:+@chr2L:19925383:19925942:+.B.dn'	(0,0):125,(0,1):15,(1,0):179,(1,1):130	0:210,1:114	(0,0):219,(0,1):11,(1,0):586,(1,1):103	0:669,1:31	chr2L	+	1990893919908930	1992594219925940
2	Hsc70Cb	chr3L:14030355:14030521:+@chr3L:14030578:14030850:+	ri	0.29	0.11	0.55	0.78	0.56	0.95	-0.49	89.03	'chr3L:14030355:14030521:+@chr3L:14030578:14030850:+.A.withRI','chr3L:14030355:14030521:+@chr3L:14030578:14030850:+.B.up_chr3L:14030355:14030521:+@chr3L:14030578:14030850:+.B.dn'	(0,0):49,(1,0):7,(1,1):114	0:35,1:86	(0,0):52,(1,0):26,(1,1):119	0:91,1:54	chr3L	+	1403035514030350	1403085014030850
3	Dscam1	chr2R:3213657:3213869:-@chr2R:3212087:3212233:-	ri	0.25	0.12	0.45	0.71	0.35	0.98	-0.46	4.8	'chr2R:3213657:3213869:-@chr2R:3212087:3212233:-.A.withRI','chr2R:3213657:3213869:-@chr2R:3212087:3212233:-.B.dn_chr2R:3213657:3213869:-@chr2R:3212087:3212233:-.B.up'	(0,0):10,(0,1):3,(1,0):20,(1,1):7	0:21,1:9	(0,0):5,(1,0):25,(1,1):3	0:27,1:1	chr2R	-	32120873212087	32138693213869
4	Oatp30B	chr2L:9521219:9521495|9521246:+@chr2L:9523163:9523343:+	a5ss	0.33	0.23	0.45	0.79	0.56	0.95	-0.46	41.77	'chr2L:9521219:9521495|9521246:+@chr2L:9523163:9523343:+.A.coreAndExt_chr2L:9521219:9521495|9521246:+@chr2L:9523163:9523343:+.A.dn','chr2L:9521219:9521495|9521246:+@chr2L:9523163:9523343:+.B.core_chr2L:9521219:9521495|9521246:+@chr2L:9523163:9523343:+.B.dn'	(0,0):146,(0,1):8,(1,0):76,(1,1):35	0:101,1:18	(0,0):124,(1,0):77,(1,1):16	0:85,1:8	chr2L	+	95212199521219	95233439523343
5	Oatp30B	chr2L:9521219:9521395|9521246:+@chr2L:9523163:9523343:+	a5ss	0.14	0.07	0.22	0.59	0.31	0.93	-0.45	57.03	'chr2L:9521219:9521395|9521246:+@chr2L:9523163:9523343:+.A.coreAndExt_chr2L:9521219:9521395|9521246:+@chr2L:9523163:9523343:+.A.dn','chr2L:9521219:9521395|9521246:+@chr2L:9523163:9523343:+.B.core_chr2L:9521219:9521395|9521246:+@chr2L:9523163:9523343:+.B.dn'	(0,0):206,(0,1):8,(1,0):16,(1,1):35	0:22,1:37	(0,0):179,(1,0):22,(1,1):16	0:32,1:6	chr2L	+	95212199521219	95233439523343
6	Hsc70Cb	chr3L:14030355:14030512:+@chr3L:14030578:14030850:+	ri	0.26	0.12	0.47	0.69	0.45	0.89	-0.43	22.61	'chr3L:14030355:14030512:+@chr3L:14030578:14030850:+.A.withRI','chr3L:14030355:14030512:+@chr3L:14030578:14030850:+.B.up_chr3L:14030355:14030512:+@chr3L:14030578:14030850:+.B.dn'	(0,0):49,(1,0):7,(1,1):114	0:47,1:74	(0,0):52,(1,0):26,(1,1):119	0:115,1:30	chr3L	+	1403035514030350	1403085014030850
7	Hsc70Cb	chr3L:14030355:14030502:+@chr3L:14030578:14030850:+	ri	0.24	0.11	0.44	0.67	0.45	0.91	-0.43	24.29	'chr3L:14030355:14030502:+@chr3L:14030578:14030850:+.A.withRI','chr3L:14030355:14030502:+@chr3L:14030578:14030850:+.B.up_chr3L:14030355:14030502:+@chr3L:14030578:14030850:+.B.dn'	(0,0):49,(1,0):8,(1,1):113	0:37,1:84	(0,0):52,(1,0):28,(1,1):117	0:100,1:45	chr3L	+	1403035514030350	1403085014030850
8	Oatp30B	chr2L:9521219:9521440|9521246:+@chr2L:9523163:9523343:+	a5ss	0.35	0.24	0.49	0.78	0.53	0.97	-0.43	41	'chr2L:9521219:9521440|9521246:+@chr2L:9523163:9523343:+.A.coreAndExt_chr2L:9521219:9521440|9521246:+@chr2L:9523163:9523343:+.A.dn','chr2L:9521219:9521440|9521246:+@chr2L:9523163:9523343:+.B.core_chr2L:9521219:9521440|9521246:+@chr2L:9523163:9523343:+.B.dn'	(0,0):158,(0,1):8,(1,0):64,(1,1):35	0:76,1:31	(0,0):147,(1,0):54,(1,1):16	0:68,1:2	chr2L	+	95212199521219	95233439523343
9	PAPLA1, CG43394	chr2L:8157062:8157256:+@chr2L:8157537:8157948:+	ri	0.16	0.08	0.27	0.55	0.35	0.77	-0.39	63.57	'chr2L:8157062:8157256:+@chr2L:8157537:8157948:+.A.withRI','chr2L:8157062:8157256:+@chr2L:8157537:8157948:+.B.up_chr2L:8157062:8157256:+@chr2L:8157537:8157948:+.B.dn'	(0,0):14,(0,1):16,(1,0):7,(1,1):24	0:11,1:36	(0,0):3,(0,1):5,(1,0):18,(1,1):22	0:25,1:20	chr2L	+	81570628157062	81579488157948
10	PhKgamma	chrX:11589857:11589972:+@chrX:11590436:11590573:+	ri	0.24	0.16	0.33	0.57	0.39	0.77	-0.33	31.53	'chrX:11589857:11589972:+@chrX:11590436:11590573:+.A.withRI','chrX:11589857:11589972:+@chrX:11590436:11590573:+.B.up_chrX:11589857:11589972:+@chrX:11590436:11590573:+.B.dn'	(0,0):61,(0,1):23,(1,0):53,(1,1):1	0:53,1:24	(0,0):27,(0,1):6,(1,0):60,(1,1):1	0:61,1:6	chrX	+	1158985711589850	1159057311590570
11	PhKgamma	chrX:11589857:11590344|11589972:+@chrX:11590436:11590573:+	a5ss	0.28	0.19	0.38	0.58	0.39	0.76	-0.3	10.88	'chrX:11589857:11590344|11589972:+@chrX:11590436:11590573:+.A.coreAndExt_chrX:11589857:11590344|11589972:+@chrX:11590436:11590573:+.A.dn','chrX:11589857:11590344|11589972:+@chrX:11590436:11590573:+.B.core_chrX:11589857:11590344|11589972:+@chrX:11590436:11590573:+.B.dn'	(0,0):62,(0,1):23,(1,0):52,(1,1):1	0:53,1:23	(0,0):34,(0,1):6,(1,0):53,(1,1):1	0:54,1:6	chrX	+	1158985711589850	1159057311590570
12	CG31323	chr3R:21996570:21997177|21996760:+@chr3R:22009522:22009686:+	a5ss	0.62	0.46	0.77	0.89	0.76	0.97	-0.27	23.59	'chr3R:21996570:21997177|21996760:+@chr3R:22009522:22009686:+.A.coreAndExt_chr3R:21996570:21997177|21996760:+@chr3R:22009522:22009686:+.A.dn','chr3R:21996570:21997177|21996760:+@chr3R:22009522:22009686:+.B.core_chr3R:21996570:21997177|21996760:+@chr3R:22009522:22009686:+.B.dn'	(0,0):190,(0,1):8,(1,0):55,(1,1):5	0:57,1:11	(0,0):180,(0,1):1,(1,0):65,(1,1):5	0:70,1:1	chr3R	+	2199657021996570	2200968622009680
13	scaf	chr2R:1572309:1572482:-@chr2R:1567271:1568022:-	ri	0.11	0.09	0.13	0.34	0.3	0.39	-0.23	1000000000000	'chr2R:1572309:1572482:-@chr2R:1567271:1568022:-.A.withRI','chr2R:1572309:1572482:-@chr2R:1567271:1568022:-.B.dn_chr2R:1572309:1572482:-@chr2R:1567271:1568022:-.B.up'	(0,0):77,(0,1):42,(1,0):189,(1,1):249	0:221,1:259	(0,0):68,(0,1):28,(1,0):469,(1,1):187	0:531,1:153	chr2R	-	15672711567271	15724821572482
14	Sfmbt	chr2L:13175667:13175952:-@chr2L:13174439:13175276:-@chr2L:13172643:13173941:-	se	0.36	0.27	0.48	0.56	0.44	0.69	-0.2	3.69	'chr2L:13175667:13175952:-@chr2L:13174439:13175276:-@chr2L:13172643:13173941:-.A.dn_chr2L:13175667:13175952:-@chr2L:13174439:13175276:-@chr2L:13172643:13173941:-.A.se_chr2L:13175667:13175952:-@chr2L:13174439:13175276:-@chr2L:13172643:13173941:-.A.up','chr2L:13175667:13175952:-@chr2L:13174439:13175276:-@chr2L:13172643:13173941:-.B.dn_chr2L:13175667:13175952:-@chr2L:13174439:13175276:-@chr2L:131726…	(0,0):28,(0,1):3,(1,0):48,(1,1):209	0:123,1:137	(0,0):32,(0,1):10,(1,0):67,(1,1):141	0:153,1:65	chr2L	-	1317264313172640	1317595213175950
15	CG18659	chr2R:5018988:5019477:-@chr2R:5018669:5018863:-	ri	0.08	0.02	0.17	0.28	0.16	0.45	-0.2	4.16	'chr2R:5018988:5019477:-@chr2R:5018669:5018863:-.A.withRI','chr2R:5018988:5019477:-@chr2R:5018669:5018863:-.B.dn_chr2R:5018988:5019477:-@chr2R:5018669:5018863:-.B.up'	(0,0):14,(0,1):14,(1,0):3,(1,1):68	0:5,1:80	(0,0):21,(0,1):9,(1,0):12,(1,1):79	0:30,1:70	chr2R	-	50186695018669	50194775019477
16	Sirup	chr2L:7998934:7999169|7998997:+@chr2L:7999249:7999743:+	a5ss	0.81	0.74	0.87	0.98	0.95	1	-0.17	1.01049e+09	'chr2L:7998934:7999169|7998997:+@chr2L:7999249:7999743:+.A.coreAndExt_chr2L:7998934:7999169|7998997:+@chr2L:7999249:7999743:+.A.dn','chr2L:7998934:7999169|7998997:+@chr2L:7999249:7999743:+.B.core_chr2L:7998934:7999169|7998997:+@chr2L:7999249:7999743:+.B.dn'	(0,0):455,(1,0):673,(1,1):1749	0:2111,1:311	(0,0):462,(1,0):817,(1,1):1555	0:2297,1:75	chr2L	+	79989347998934	79997437999743
17	CG44253	chr2R:18944932:18945156:+@chr2R:18946578:18946816:+	ri	0.05	0.04	0.08	0.15	0.09	0.25	-0.1	3.18	'chr2R:18944932:18945156:+@chr2R:18946578:18946816:+.A.withRI','chr2R:18944932:18945156:+@chr2R:18946578:18946816:+.B.up_chr2R:18944932:18945156:+@chr2R:18946578:18946816:+.B.dn'	(0,0):39,(0,1):37,(1,0):26,(1,1):47	0:27,1:83	(0,0):25,(0,1):7,(1,0):26,(1,1):25	0:31,1:27	chr2R	+	1894493218944930	1894681618946810
18	CG13377	chrX:157701:158061:-@chrX:152926:153704:-	ri	0.22	0.2	0.25	0.3	0.26	0.35	-0.08	3.15	'chrX:157701:158061:-@chrX:152926:153704:-.A.withRI','chrX:157701:158061:-@chrX:152926:153704:-.B.dn_chrX:157701:158061:-@chrX:152926:153704:-.B.up'	(0,0):64,(0,1):52,(1,0):461,(1,1):404	0:568,1:349	(0,0):43,(0,1):28,(1,0):353,(1,1):233	0:412,1:202	chrX	-	152926152926	158061158061
19	Osi14	chr3R:2125681:2125886:+@chr3R:2125941:2126730:+	ri	0.06	0.04	0.08	0.12	0.09	0.15	-0.06	256.5	'chr3R:2125681:2125886:+@chr3R:2125941:2126730:+.A.withRI','chr3R:2125681:2125886:+@chr3R:2125941:2126730:+.B.up_chr3R:2125681:2125886:+@chr3R:2125941:2126730:+.B.dn'	(0,0):360,(0,1):405,(1,0):50,(1,1):2724	0:223,1:2956	(0,0):244,(0,1):273,(1,0):66,(1,1):1733	0:307,1:1765	chr3R	+	21256812125681	21267302126730
20	RpL36A	chr2L:8042469:8042613:-@chr2L:8041771:8042125:-	ri	0.24	0.23	0.25	0.29	0.27	0.31	-0.05	1662.53	'chr2L:8042469:8042613:-@chr2L:8041771:8042125:-.A.withRI','chr2L:8042469:8042613:-@chr2L:8041771:8042125:-.B.dn_chr2L:8042469:8042613:-@chr2L:8041771:8042125:-.B.up'	(0,0):5272,(0,1):1515,(1,0):1344,(1,1):1194	0:1607,1:2446	(0,0):3946,(0,1):1005,(1,0):1150,(1,1):883	0:1383,1:1655	chr2L	-	80417718041771	80426138042613
21	CG5080	chr2L:1163000:1163149:-@chr2L:1161927:1162146:-	ri	0.03	0.03	0.04	0.06	0.05	0.07	-0.03	5.6	'chr2L:1163000:1163149:-@chr2L:1161927:1162146:-.A.withRI','chr2L:1163000:1163149:-@chr2L:1161927:1162146:-.B.dn_chr2L:1163000:1163149:-@chr2L:1161927:1162146:-.B.up'	(0,0):281,(0,1):350,(1,0):93,(1,1):124	0:101,1:466	(0,0):174,(0,1):179,(1,0):90,(1,1):85	0:96,1:258	chr2L	-	11619271161927	11631491163149
22	RpS26	chr2L:18443153:18443200:-@chr2L:18442505:18443070:-	ri	0	0	0.01	0.02	0.01	0.03	-0.02	266.75	'chr2L:18443153:18443200:-@chr2L:18442505:18443070:-.A.withRI','chr2L:18443153:18443200:-@chr2L:18442505:18443070:-.B.dn_chr2L:18443153:18443200:-@chr2L:18442505:18443070:-.B.up'	(0,0):704,(0,1):605,(1,0):6,(1,1):4212	0:26,1:4797	(0,0):534,(0,1):432,(1,0):23,(1,1):3598	0:118,1:3935	chr2L	-	1844250518442500	1844320018443200
23	Hsp83	chr3L:3192969:3193367:+@chr3L:3194499:3197061:+	ri	0.03	0.03	0.04	0.05	0.04	0.05	-0.02	1000000000000	'chr3L:3192969:3193367:+@chr3L:3194499:3197061:+.A.withRI','chr3L:3192969:3193367:+@chr3L:3194499:3197061:+.B.up_chr3L:3192969:3193367:+@chr3L:3194499:3197061:+.B.dn'	(0,0):191,(0,1):1420,(1,0):293,(1,1):17134	0:844,1:18003	(0,0):364,(0,1):1951,(1,0):594,(1,1):23435	0:1828,1:24152	chr3L	+	31929693192969	31970613197061
24	RpL36A	chr2L:8042440:8042613:-@chr2L:8041771:8042125:-	ri	0.07	0.07	0.08	0.09	0.08	0.09	-0.02	9	'chr2L:8042440:8042613:-@chr2L:8041771:8042125:-.A.withRI','chr2L:8042440:8042613:-@chr2L:8041771:8042125:-.B.dn_chr2L:8042440:8042613:-@chr2L:8041771:8042125:-.B.up'	(0,0):2460,(0,1):4327,(1,0):768,(1,1):1770	0:883,1:5982	(0,0):1830,(0,1):3121,(1,0):686,(1,1):1347	0:800,1:4354	chr2L	-	80417718041771	80426138042613
25	scaf	chr2R:1579157:1579226:-@chr2R:1575181:1575543:-	ri	0.13	0.1	0.15	0.07	0.06	0.09	0.06	8.42	'chr2R:1579157:1579226:-@chr2R:1575181:1575543:-.A.withRI','chr2R:1579157:1579226:-@chr2R:1575181:1575543:-.B.dn_chr2R:1579157:1579226:-@chr2R:1575181:1575543:-.B.up'	(0,0):32,(0,1):44,(1,0):232,(1,1):67	0:244,1:99	(0,0):27,(0,1):28,(1,0):131,(1,1):89	0:136,1:112	chr2R	-	15751811575181	15792261579226
26	CG34401	chrX:18758872:18759752:+@chrX:18765667:18765906:+	ri	0.11	0.09	0.14	0.05	0.03	0.06	0.06	13922.7	'chrX:18758872:18759752:+@chrX:18765667:18765906:+.A.withRI','chrX:18758872:18759752:+@chrX:18765667:18765906:+.B.up_chrX:18758872:18759752:+@chrX:18765667:18765906:+.B.dn'	(0,0):33,(0,1):12,(1,0):143,(1,1):188	0:161,1:182	(0,0):23,(0,1):7,(1,0):49,(1,1):158	0:60,1:154	chrX	+	1875887218758870	1876590618765900
27	kermit	chr2R:4043560:4044232:-@chr2R:4034422:4035900:-	ri	0.19	0.16	0.22	0.09	0.08	0.12	0.1	9.97711e+09	'chr2R:4043560:4044232:-@chr2R:4034422:4035900:-.A.withRI','chr2R:4043560:4044232:-@chr2R:4034422:4035900:-.B.dn_chr2R:4043560:4044232:-@chr2R:4034422:4035900:-.B.up'	(0,0):39,(0,1):14,(1,0):299,(1,1):379	0:371,1:321	(0,0):19,(0,1):14,(1,0):111,(1,1):289	0:147,1:267	chr2R	-	40344224034422	40442324044232
28	CG34396	chr2R:16981261:16981417:+@chr2R:16987720:16988996:+	ri	0.23	0.18	0.3	0.1	0.08	0.13	0.13	92289	'chr2R:16981261:16981417:+@chr2R:16987720:16988996:+.A.withRI','chr2R:16981261:16981417:+@chr2R:16987720:16988996:+.B.up_chr2R:16981261:16981417:+@chr2R:16987720:16988996:+.B.dn'	(0,0):15,(0,1):7,(1,0):127,(1,1):98	0:161,1:71	(0,0):25,(0,1):19,(1,0):110,(1,1):194	0:129,1:194	chr2R	+	1698126116981260	1698899616988990
29	CG4038, CG34396	chr2R:16981261:16987570|16981417:+@chr2R:16987720:16988996:+	a5ss	0.25	0.19	0.32	0.11	0.08	0.13	0.14	10205.6	'chr2R:16981261:16987570|16981417:+@chr2R:16987720:16988996:+.A.coreAndExt_chr2R:16981261:16987570|16981417:+@chr2R:16987720:16988996:+.A.dn','chr2R:16981261:16987570|16981417:+@chr2R:16987720:16988996:+.B.core_chr2R:16981261:16987570|16981417:+@chr2R:16987720:16988996:+.B.dn'	(0,0):11,(0,1):7,(1,0):131,(1,1):98	0:156,1:80	(0,0):22,(0,1):19,(1,0):113,(1,1):194	0:134,1:192	chr2R	+	1698126116981260	1698899616988990
30	fry	chr3L:9660802:9660984:-@chr3L:9657177:9657344:-	ri	0.24	0.18	0.32	0.09	0.05	0.15	0.15	25.42	'chr3L:9660802:9660984:-@chr3L:9657177:9657344:-.A.withRI','chr3L:9660802:9660984:-@chr3L:9657177:9657344:-.B.dn_chr3L:9660802:9660984:-@chr3L:9657177:9657344:-.B.up'	(0,0):58,(0,1):20,(1,0):215,(1,1):13	0:219,1:29	(0,0):35,(0,1):15,(1,0):39,(1,1):5	0:41,1:18	chr3L	-	96571779657177	96609849660984
31	RpS20	chr3R:16648524:16648581:+@chr3R:16648854:16649080:+	ri	0.42	0.39	0.45	0.25	0.23	0.28	0.17	1000000000000	'chr3R:16648524:16648581:+@chr3R:16648854:16649080:+.A.withRI','chr3R:16648524:16648581:+@chr3R:16648854:16649080:+.B.up_chr3R:16648524:16648581:+@chr3R:16648854:16649080:+.B.dn'	(0,0):1919,(0,1):198,(1,0):1115,(1,1):468	0:1305,1:476	(0,0):1502,(0,1):148,(1,0):475,(1,1):418	0:581,1:460	chr3R	+	1664852416648520	1664908016649080
32	Tif-IA	chr2L:22250545:22250853:+@chr2L:22253746:22253921:+	ri	0.48	0.33	0.68	0.26	0.18	0.36	0.22	3.22	'chr2L:22250545:22250853:+@chr2L:22253746:22253921:+.A.withRI','chr2L:22250545:22250853:+@chr2L:22253746:22253921:+.B.up_chr2L:22250545:22250853:+@chr2L:22253746:22253921:+.B.dn'	(0,0):111,(1,0):156,(1,1):33	0:168,1:21	(0,0):84,(1,0):118,(1,1):48	0:130,1:36	chr2L	+	2225054522250540	2225392122253920
33	dl	chr2L:17437419:17438017:-@chr2L:17436830:17437323:-	ri	0.36	0.23	0.52	0.13	0.05	0.23	0.23	7.96	'chr2L:17437419:17438017:-@chr2L:17436830:17437323:-.A.withRI','chr2L:17437419:17438017:-@chr2L:17436830:17437323:-.B.dn_chr2L:17437419:17438017:-@chr2L:17436830:17437323:-.B.up'	(0,0):5,(0,1):9,(1,0):15,(1,1):148	0:51,1:121	(0,0):11,(0,1):25,(1,0):7,(1,1):170	0:21,1:181	chr2L	-	1743683017436830	1743801717438010
34	Axn	chr3R:25857145:25857834:+@chr3R:25858653:25858749:+	ri	0.37	0.2	0.6	0.11	0.04	0.23	0.26	4.56	'chr3R:25857145:25857834:+@chr3R:25858653:25858749:+.A.withRI','chr3R:25857145:25857834:+@chr3R:25858653:25858749:+.B.up_chr3R:25857145:25857834:+@chr3R:25858653:25858749:+.B.dn'	(0,0):26,(0,1):1,(1,0):18,(1,1):35	0:37,1:17	(0,0):21,(0,1):3,(1,0):5,(1,1):36	0:12,1:32	chr3R	+	2585714525857140	2585874925858740
35	CG31224	chr3R:14485019:14484976|14484482:-@chr3R:14481887:14482907:-	a5ss	0.77	0.6	0.91	0.49	0.37	0.62	0.28	9.46	'chr3R:14485019:14484976|14484482:-@chr3R:14481887:14482907:-.A.dn_chr3R:14485019:14484976|14484482:-@chr3R:14481887:14482907:-.A.coreAndExt','chr3R:14485019:14484976|14484482:-@chr3R:14481887:14482907:-.B.dn_chr3R:14485019:14484976|14484482:-@chr3R:14481887:14482907:-.B.core'	(0,0):80,(1,0):80,(1,1):183	0:215,1:48	(0,0):84,(0,1):12,(1,0):54,(1,1):133	0:111,1:88	chr3R	-	1448188714481880	1448501914485010
36	wech	chr2R:3375961:3376252:-@chr2R:3373390:3373672:-	ri	0.52	0.38	0.66	0.24	0.14	0.39	0.28	9.78	'chr2R:3375961:3376252:-@chr2R:3373390:3373672:-.A.withRI','chr2R:3375961:3376252:-@chr2R:3373390:3373672:-.B.dn_chr2R:3375961:3376252:-@chr2R:3373390:3373672:-.B.up'	(0,0):10,(0,1):7,(1,0):142,(1,1):28	0:157,1:20	(0,0):9,(0,1):6,(1,0):32,(1,1):15	0:41,1:12	chr2R	-	33733903373390	33762523376252
37	Dg	chr2R:11974436:11975230:-@chr2R:11973732:11973798:-	ri	0.48	0.32	0.68	0.19	0.1	0.3	0.29	13.18	'chr2R:11974436:11975230:-@chr2R:11973732:11973798:-.A.withRI','chr2R:11974436:11975230:-@chr2R:11973732:11973798:-.B.dn_chr2R:11974436:11975230:-@chr2R:11973732:11973798:-.B.up'	(0,0):22,(0,1):3,(1,0):28,(1,1):54	0:51,1:34	(0,0):21,(0,1):4,(1,0):13,(1,1):73	0:23,1:67	chr2R	-	1197373211973730	1197523011975230
38	mura	chr3R:5375381:5375532:-@chr3R:5372520:5373092:-	ri	0.87	0.69	0.99	0.5	0.39	0.65	0.37	25	'chr3R:5375381:5375532:-@chr3R:5372520:5373092:-.A.withRI','chr3R:5375381:5375532:-@chr3R:5372520:5373092:-.B.dn_chr3R:5375381:5375532:-@chr3R:5372520:5373092:-.B.up'	(0,0):64,(1,0):322,(1,1):86	0:399,1:9	(0,0):56,(1,0):210,(1,1):101	0:243,1:68	chr3R	-	53725205372520	53755325375532
39	lt	chr2L:22820170:22820497:+@chr2L:22831506:22831574:+@chr2L:22832086:22832272:+	se	0.8	0.56	0.97	0.37	0.21	0.57	0.43	8.05	'chr2L:22820170:22820497:+@chr2L:22831506:22831574:+@chr2L:22832086:22832272:+.A.up_chr2L:22820170:22820497:+@chr2L:22831506:22831574:+@chr2L:22832086:22832272:+.A.se_chr2L:22820170:22820497:+@chr2L:22831506:22831574:+@chr2L:22832086:22832272:+.A.dn','chr2L:22820170:22820497:+@chr2L:22831506:22831574:+@chr2L:22832086:22832272:+.B.up_chr2L:22820170:22820497:+@chr2L:22831506:22831574:+@chr2L:228320…	(0,0):500,(1,0):24,(1,1):127	0:108,1:43	(0,0):382,(0,1):4,(1,0):10,(1,1):97	0:48,1:63	chr2L	+	2282017022820170	2283227222832270
40	yin	chrX:3760545:3760750:-@chrX:3759391:3759472:-	ri	0.76	0.48	0.95	0.31	0.14	0.54	0.45	11.26	'chrX:3760545:3760750:-@chrX:3759391:3759472:-.A.withRI','chrX:3760545:3760750:-@chrX:3759391:3759472:-.B.dn_chrX:3760545:3760750:-@chrX:3759391:3759472:-.B.up'	(0,0):21,(1,0):75,(1,1):6	0:80,1:1	(0,0):12,(0,1):3,(1,0):21,(1,1):3	0:21,1:6	chrX	-	37593913759391	37607503760750
41	RhoGEF2	chr2R:12914830:12914844:+@chr2R:12916178:12916526:+	ri	0.84	0.73	0.94	0.13	0.09	0.18	0.71	1000000000000	'chr2R:12914830:12914844:+@chr2R:12916178:12916526:+.A.withRI','chr2R:12914830:12914844:+@chr2R:12916178:12916526:+.B.up_chr2R:12914830:12914844:+@chr2R:12916178:12916526:+.B.dn'	(0,0):58,(0,1):5,(1,0):803,(1,1):81	0:872,1:17	(0,0):26,(0,1):5,(1,0):68,(1,1):63	0:75,1:61	chr2R	+	1291483012914830	1291652612916520
42	RhoGEF2	chr2R:12914830:12914940:+@chr2R:12916178:12916526:+	ri	0.97	0.93	1	0.23	0.16	0.32	0.74	1000000000000	'chr2R:12914830:12914940:+@chr2R:12916178:12916526:+.A.withRI','chr2R:12914830:12914940:+@chr2R:12916178:12916526:+.B.up_chr2R:12914830:12914940:+@chr2R:12916178:12916526:+.B.dn'	(0,0):62,(0,1):1,(1,0):802,(1,1):82	0:883,1:2	(0,0):29,(0,1):2,(1,0):68,(1,1):63	0:77,1:56	chr2R	+	1291483012914830	1291652612916520
	gene	event_name	type	WT_posterior_mean	WT_ci_low	WT_ci_high	T205I_posterior_mean	T205I_ci_low	T205I_ci_high	diff	bayes_factor	isoforms	WT_counts	WT_assigned_counts	T205I_counts	T205I_assigned_counts	chrom	strand	mRNA_starts	mRNA_ends
1	Victoria, sick, TotF	chr2L:19908939:19918585|19910432:+@chr2L:19925383:19925942:+	a5ss	0.27	0.21	0.32	0.83	0.76	0.89	-0.56	1000000000000	'chr2L:19908939:19918585|19910432:+@chr2L:19925383:19925942:+.A.coreAndExt_chr2L:19908939:19918585|19910432:+@chr2L:19925383:19925942:+.A.dn','chr2L:19908939:19918585|19910432:+@chr2L:19925383:19925942:+.B.core_chr2L:19908939:19918585|19910432:+@chr2L:19925383:19925942:+.B.dn'	(0,0):125,(0,1):15,(1,0):179,(1,1):130	0:210,1:114	(0,0):219,(0,1):15,(1,0):758,(1,1):98	0:845,1:26	chr2L	+	1990893919908930	1992594219925940
2	Hsc70Cb	chr3L:14030355:14030521:+@chr3L:14030578:14030850:+	ri	0.29	0.11	0.55	0.66	0.43	0.84	-0.37	3.88	'chr3L:14030355:14030521:+@chr3L:14030578:14030850:+.A.withRI','chr3L:14030355:14030521:+@chr3L:14030578:14030850:+.B.up_chr3L:14030355:14030521:+@chr3L:14030578:14030850:+.B.dn'	(0,0):49,(1,0):7,(1,1):114	0:35,1:86	(0,0):47,(0,1):1,(1,0):28,(1,1):113	0:101,1:41	chr3L	+	1403035514030350	1403085014030850
3	Hsc70Cb	chr3L:14030355:14030512:+@chr3L:14030578:14030850:+	ri	0.26	0.12	0.47	0.62	0.43	0.86	-0.36	10.92	'chr3L:14030355:14030512:+@chr3L:14030578:14030850:+.A.withRI','chr3L:14030355:14030512:+@chr3L:14030578:14030850:+.B.up_chr3L:14030355:14030512:+@chr3L:14030578:14030850:+.B.dn'	(0,0):49,(1,0):7,(1,1):114	0:47,1:74	(0,0):47,(0,1):1,(1,0):28,(1,1):113	0:92,1:50	chr3L	+	1403035514030350	1403085014030850
4	Hsc70Cb	chr3L:14030355:14030502:+@chr3L:14030578:14030850:+	ri	0.24	0.11	0.44	0.59	0.38	0.82	-0.35	7.97	'chr3L:14030355:14030502:+@chr3L:14030578:14030850:+.A.withRI','chr3L:14030355:14030502:+@chr3L:14030578:14030850:+.B.up_chr3L:14030355:14030502:+@chr3L:14030578:14030850:+.B.dn'	(0,0):49,(1,0):8,(1,1):113	0:37,1:84	(0,0):47,(0,1):1,(1,0):29,(1,1):112	0:93,1:49	chr3L	+	1403035514030350	1403085014030850
5	Dscam1	chr2R:3213657:3213869:-@chr2R:3212087:3212233:-	ri	0.25	0.12	0.45	0.6	0.26	0.85	-0.35	3.66	'chr2R:3213657:3213869:-@chr2R:3212087:3212233:-.A.withRI','chr2R:3213657:3213869:-@chr2R:3212087:3212233:-.B.dn_chr2R:3213657:3213869:-@chr2R:3212087:3212233:-.B.up'	(0,0):10,(0,1):3,(1,0):20,(1,1):7	0:21,1:9	(0,0):13,(0,1):1,(1,0):15	0:15,1:1	chr2R	-	32120873212087	32138693213869
6	PhKgamma	chrX:11589857:11589972:+@chrX:11590436:11590573:+	ri	0.24	0.16	0.33	0.55	0.39	0.74	-0.31	41.87	'chrX:11589857:11589972:+@chrX:11590436:11590573:+.A.withRI','chrX:11589857:11589972:+@chrX:11590436:11590573:+.B.up_chrX:11589857:11589972:+@chrX:11590436:11590573:+.B.dn'	(0,0):61,(0,1):23,(1,0):53,(1,1):1	0:53,1:24	(0,0):47,(0,1):8,(1,0):76,(1,1):1	0:77,1:8	chrX	+	1158985711589850	1159057311590570
7	PhKgamma	chrX:11589857:11590344|11589972:+@chrX:11590436:11590573:+	a5ss	0.28	0.19	0.38	0.58	0.43	0.76	-0.3	19	'chrX:11589857:11590344|11589972:+@chrX:11590436:11590573:+.A.coreAndExt_chrX:11589857:11590344|11589972:+@chrX:11590436:11590573:+.A.dn','chrX:11589857:11590344|11589972:+@chrX:11590436:11590573:+.B.core_chrX:11589857:11590344|11589972:+@chrX:11590436:11590573:+.B.dn'	(0,0):62,(0,1):23,(1,0):52,(1,1):1	0:53,1:23	(0,0):53,(0,1):8,(1,0):70,(1,1):1	0:71,1:8	chrX	+	1158985711589850	1159057311590570
8	CG31323	chr3R:21996570:21997177|21996760:+@chr3R:22009522:22009686:+	a5ss	0.62	0.46	0.77	0.91	0.79	0.99	-0.29	10.04	'chr3R:21996570:21997177|21996760:+@chr3R:22009522:22009686:+.A.coreAndExt_chr3R:21996570:21997177|21996760:+@chr3R:22009522:22009686:+.A.dn','chr3R:21996570:21997177|21996760:+@chr3R:22009522:22009686:+.B.core_chr3R:21996570:21997177|21996760:+@chr3R:22009522:22009686:+.B.dn'	(0,0):190,(0,1):8,(1,0):55,(1,1):5	0:57,1:11	(0,0):296,(0,1):1,(1,0):88,(1,1):4	0:92,1:1	chr3R	+	2199657021996570	2200968622009680
9	Oatp30B	chr2L:9521219:9521440|9521246:+@chr2L:9523163:9523343:+	a5ss	0.35	0.24	0.49	0.63	0.46	0.82	-0.28	4.01	'chr2L:9521219:9521440|9521246:+@chr2L:9523163:9523343:+.A.coreAndExt_chr2L:9521219:9521440|9521246:+@chr2L:9523163:9523343:+.A.dn','chr2L:9521219:9521440|9521246:+@chr2L:9523163:9523343:+.B.core_chr2L:9521219:9521440|9521246:+@chr2L:9523163:9523343:+.B.dn'	(0,0):158,(0,1):8,(1,0):64,(1,1):35	0:76,1:31	(0,0):177,(0,1):4,(1,0):77,(1,1):19	0:87,1:13	chr2L	+	95212199521219	95233439523343
10	PAPLA1, CG43394	chr2L:8157062:8157256:+@chr2L:8157537:8157948:+	ri	0.16	0.08	0.27	0.42	0.23	0.61	-0.26	3.71	'chr2L:8157062:8157256:+@chr2L:8157537:8157948:+.A.withRI','chr2L:8157062:8157256:+@chr2L:8157537:8157948:+.B.up_chr2L:8157062:8157256:+@chr2L:8157537:8157948:+.B.dn'	(0,0):14,(0,1):16,(1,0):7,(1,1):24	0:11,1:36	(0,0):6,(0,1):9,(1,0):17,(1,1):24	0:30,1:20	chr2L	+	81570628157062	81579488157948
11	Oatp30B	chr2L:9521219:9521495|9521246:+@chr2L:9523163:9523343:+	a5ss	0.33	0.23	0.45	0.58	0.41	0.76	-0.25	3.23	'chr2L:9521219:9521495|9521246:+@chr2L:9523163:9523343:+.A.coreAndExt_chr2L:9521219:9521495|9521246:+@chr2L:9523163:9523343:+.A.dn','chr2L:9521219:9521495|9521246:+@chr2L:9523163:9523343:+.B.core_chr2L:9521219:9521495|9521246:+@chr2L:9523163:9523343:+.B.dn'	(0,0):146,(0,1):8,(1,0):76,(1,1):35	0:101,1:18	(0,0):163,(0,1):4,(1,0):91,(1,1):19	0:98,1:16	chr2L	+	95212199521219	95233439523343
12	Oatp30B	chr2L:9521219:9521395|9521246:+@chr2L:9523163:9523343:+	a5ss	0.14	0.07	0.22	0.34	0.2	0.53	-0.2	3.5	'chr2L:9521219:9521395|9521246:+@chr2L:9523163:9523343:+.A.coreAndExt_chr2L:9521219:9521395|9521246:+@chr2L:9523163:9523343:+.A.dn','chr2L:9521219:9521395|9521246:+@chr2L:9523163:9523343:+.B.core_chr2L:9521219:9521395|9521246:+@chr2L:9523163:9523343:+.B.dn'	(0,0):206,(0,1):8,(1,0):16,(1,1):35	0:22,1:37	(0,0):231,(0,1):4,(1,0):23,(1,1):19	0:28,1:18	chr2L	+	95212199521219	95233439523343
13	Sfmbt	chr2L:13175667:13175952:-@chr2L:13174439:13175276:-@chr2L:13172643:13173941:-	se	0.36	0.27	0.48	0.56	0.44	0.68	-0.2	3.22	'chr2L:13175667:13175952:-@chr2L:13174439:13175276:-@chr2L:13172643:13173941:-.A.dn_chr2L:13175667:13175952:-@chr2L:13174439:13175276:-@chr2L:13172643:13173941:-.A.se_chr2L:13175667:13175952:-@chr2L:13174439:13175276:-@chr2L:13172643:13173941:-.A.up','chr2L:13175667:13175952:-@chr2L:13174439:13175276:-@chr2L:13172643:13173941:-.B.dn_chr2L:13175667:13175952:-@chr2L:13174439:13175276:-@chr2L:131726…	(0,0):28,(0,1):3,(1,0):48,(1,1):209	0:123,1:137	(0,0):36,(0,1):10,(1,0):83,(1,1):185	0:209,1:69	chr2L	-	1317264313172640	1317595213175950
14	Sirup	chr2L:7998934:7999169|7998997:+@chr2L:7999249:7999743:+	a5ss	0.81	0.74	0.87	0.99	0.96	1	-0.18	1000000000000	'chr2L:7998934:7999169|7998997:+@chr2L:7999249:7999743:+.A.coreAndExt_chr2L:7998934:7999169|7998997:+@chr2L:7999249:7999743:+.A.dn','chr2L:7998934:7999169|7998997:+@chr2L:7999249:7999743:+.B.core_chr2L:7998934:7999169|7998997:+@chr2L:7999249:7999743:+.B.dn'	(0,0):455,(1,0):673,(1,1):1749	0:2111,1:311	(0,0):562,(1,0):1076,(1,1):1930	0:3002,1:4	chr2L	+	79989347998934	79997437999743
15	CG18659	chr2R:5018988:5019477:-@chr2R:5018669:5018863:-	ri	0.08	0.02	0.17	0.23	0.13	0.34	-0.15	3.4	'chr2R:5018988:5019477:-@chr2R:5018669:5018863:-.A.withRI','chr2R:5018988:5019477:-@chr2R:5018669:5018863:-.B.dn_chr2R:5018988:5019477:-@chr2R:5018669:5018863:-.B.up'	(0,0):14,(0,1):14,(1,0):3,(1,1):68	0:5,1:80	(0,0):15,(0,1):19,(1,0):15,(1,1):121	0:54,1:101	chr2R	-	50186695018669	50194775019477
16	CG13377	chrX:157701:158061:-@chrX:152926:153704:-	ri	0.22	0.2	0.25	0.31	0.27	0.35	-0.09	43	'chrX:157701:158061:-@chrX:152926:153704:-.A.withRI','chrX:157701:158061:-@chrX:152926:153704:-.B.dn_chrX:157701:158061:-@chrX:152926:153704:-.B.up'	(0,0):64,(0,1):52,(1,0):461,(1,1):404	0:568,1:349	(0,0):55,(0,1):50,(1,0):542,(1,1):322	0:646,1:268	chrX	-	152926152926	158061158061
17	CG44253	chr2R:18944932:18945156:+@chr2R:18946578:18946816:+	ri	0.05	0.04	0.08	0.13	0.09	0.19	-0.08	16.74	'chr2R:18944932:18945156:+@chr2R:18946578:18946816:+.A.withRI','chr2R:18944932:18945156:+@chr2R:18946578:18946816:+.B.up_chr2R:18944932:18945156:+@chr2R:18946578:18946816:+.B.dn'	(0,0):39,(0,1):37,(1,0):26,(1,1):47	0:27,1:83	(0,0):31,(0,1):29,(1,0):56,(1,1):40	0:61,1:64	chr2R	+	1894493218944930	1894681618946810
18	scaf	chr2R:1572309:1572482:-@chr2R:1567271:1568022:-	ri	0.11	0.09	0.13	0.18	0.16	0.21	-0.07	2.21518e+06	'chr2R:1572309:1572482:-@chr2R:1567271:1568022:-.A.withRI','chr2R:1572309:1572482:-@chr2R:1567271:1568022:-.B.dn_chr2R:1572309:1572482:-@chr2R:1567271:1568022:-.B.up'	(0,0):77,(0,1):42,(1,0):189,(1,1):249	0:221,1:259	(0,0):98,(0,1):61,(1,0):390,(1,1):278	0:434,1:295	chr2R	-	15672711567271	15724821572482
19	Osi14	chr3R:2125681:2125886:+@chr3R:2125941:2126730:+	ri	0.06	0.04	0.08	0.13	0.1	0.15	-0.07	56610.1	'chr3R:2125681:2125886:+@chr3R:2125941:2126730:+.A.withRI','chr3R:2125681:2125886:+@chr3R:2125941:2126730:+.B.up_chr3R:2125681:2125886:+@chr3R:2125941:2126730:+.B.dn'	(0,0):360,(0,1):405,(1,0):50,(1,1):2724	0:223,1:2956	(0,0):377,(0,1):341,(1,0):92,(1,1):2808	0:403,1:2838	chr3R	+	21256812125681	21267302126730
20	CG5080	chr2L:1163000:1163149:-@chr2L:1161927:1162146:-	ri	0.03	0.03	0.04	0.06	0.05	0.07	-0.03	74.25	'chr2L:1163000:1163149:-@chr2L:1161927:1162146:-.A.withRI','chr2L:1163000:1163149:-@chr2L:1161927:1162146:-.B.dn_chr2L:1163000:1163149:-@chr2L:1161927:1162146:-.B.up'	(0,0):281,(0,1):350,(1,0):93,(1,1):124	0:101,1:466	(0,0):271,(0,1):307,(1,0):142,(1,1):88	0:148,1:389	chr2L	-	11619271161927	11631491163149
21	RpS26	chr2L:18443153:18443200:-@chr2L:18442505:18443070:-	ri	0	0	0.01	0.02	0.01	0.02	-0.02	7.32	'chr2L:18443153:18443200:-@chr2L:18442505:18443070:-.A.withRI','chr2L:18443153:18443200:-@chr2L:18442505:18443070:-.B.dn_chr2L:18443153:18443200:-@chr2L:18442505:18443070:-.B.up'	(0,0):704,(0,1):605,(1,0):6,(1,1):4212	0:26,1:4797	(0,0):615,(0,1):522,(1,0):26,(1,1):4621	0:84,1:5085	chr2L	-	1844250518442500	1844320018443200
22	Hsp83	chr3L:3192969:3193367:+@chr3L:3194499:3197061:+	ri	0.03	0.03	0.04	0.02	0.02	0.02	0.01	1000000000000	'chr3L:3192969:3193367:+@chr3L:3194499:3197061:+.A.withRI','chr3L:3192969:3193367:+@chr3L:3194499:3197061:+.B.up_chr3L:3192969:3193367:+@chr3L:3194499:3197061:+.B.dn'	(0,0):191,(0,1):1420,(1,0):293,(1,1):17134	0:844,1:18003	(0,0):205,(0,1):1567,(1,0):159,(1,1):16131	0:475,1:17382	chr3L	+	31929693192969	31970613197061
23	RpL36A	chr2L:8042440:8042613:-@chr2L:8041771:8042125:-	ri	0.07	0.07	0.08	0.04	0.03	0.04	0.03	1000000000000	'chr2L:8042440:8042613:-@chr2L:8041771:8042125:-.A.withRI','chr2L:8042440:8042613:-@chr2L:8041771:8042125:-.B.dn_chr2L:8042440:8042613:-@chr2L:8041771:8042125:-.B.up'	(0,0):2460,(0,1):4327,(1,0):768,(1,1):1770	0:883,1:5982	(0,0):2884,(0,1):4318,(1,0):372,(1,1):1720	0:423,1:5987	chr2L	-	80417718041771	80426138042613
24	RpL36A	chr2L:8042469:8042613:-@chr2L:8041771:8042125:-	ri	0.24	0.23	0.25	0.19	0.18	0.2	0.05	1.41573e+11	'chr2L:8042469:8042613:-@chr2L:8041771:8042125:-.A.withRI','chr2L:8042469:8042613:-@chr2L:8041771:8042125:-.B.dn_chr2L:8042469:8042613:-@chr2L:8041771:8042125:-.B.up'	(0,0):5272,(0,1):1515,(1,0):1344,(1,1):1194	0:1607,1:2446	(0,0):5645,(0,1):1557,(1,0):1037,(1,1):1055	0:1248,1:2401	chr2L	-	80417718041771	80426138042613
25	scaf	chr2R:1579157:1579226:-@chr2R:1575181:1575543:-	ri	0.13	0.1	0.15	0.07	0.06	0.09	0.06	92.31	'chr2R:1579157:1579226:-@chr2R:1575181:1575543:-.A.withRI','chr2R:1579157:1579226:-@chr2R:1575181:1575543:-.B.dn_chr2R:1579157:1579226:-@chr2R:1575181:1575543:-.B.up'	(0,0):32,(0,1):44,(1,0):232,(1,1):67	0:244,1:99	(0,0):38,(0,1):45,(1,0):156,(1,1):92	0:161,1:132	chr2R	-	15751811575181	15792261579226
26	CG34401	chrX:18758872:18759752:+@chrX:18765667:18765906:+	ri	0.11	0.09	0.14	0.05	0.04	0.07	0.06	671.59	'chrX:18758872:18759752:+@chrX:18765667:18765906:+.A.withRI','chrX:18758872:18759752:+@chrX:18765667:18765906:+.B.up_chrX:18758872:18759752:+@chrX:18765667:18765906:+.B.dn'	(0,0):33,(0,1):12,(1,0):143,(1,1):188	0:161,1:182	(0,0):35,(0,1):9,(1,0):79,(1,1):228	0:90,1:226	chrX	+	1875887218758870	1876590618765900
27	kermit	chr2R:4043560:4044232:-@chr2R:4034422:4035900:-	ri	0.19	0.16	0.22	0.08	0.07	0.1	0.11	1000000000000	'chr2R:4043560:4044232:-@chr2R:4034422:4035900:-.A.withRI','chr2R:4043560:4044232:-@chr2R:4034422:4035900:-.B.dn_chr2R:4043560:4044232:-@chr2R:4034422:4035900:-.B.up'	(0,0):39,(0,1):14,(1,0):299,(1,1):379	0:371,1:321	(0,0):42,(0,1):33,(1,0):136,(1,1):392	0:171,1:390	chr2R	-	40344224034422	40442324044232
28	CG34396	chr2R:16981261:16981417:+@chr2R:16987720:16988996:+	ri	0.23	0.18	0.3	0.11	0.09	0.14	0.12	4514.26	'chr2R:16981261:16981417:+@chr2R:16987720:16988996:+.A.withRI','chr2R:16981261:16981417:+@chr2R:16987720:16988996:+.B.up_chr2R:16981261:16981417:+@chr2R:16987720:16988996:+.B.dn'	(0,0):15,(0,1):7,(1,0):127,(1,1):98	0:161,1:71	(0,0):29,(0,1):24,(1,0):133,(1,1):199	0:153,1:203	chr2R	+	1698126116981260	1698899616988990
29	fry	chr3L:9660802:9660984:-@chr3L:9657177:9657344:-	ri	0.24	0.18	0.32	0.12	0.07	0.18	0.12	3.08	'chr3L:9660802:9660984:-@chr3L:9657177:9657344:-.A.withRI','chr3L:9660802:9660984:-@chr3L:9657177:9657344:-.B.dn_chr3L:9660802:9660984:-@chr3L:9657177:9657344:-.B.up'	(0,0):58,(0,1):20,(1,0):215,(1,1):13	0:219,1:29	(0,0):31,(0,1):13,(1,0):53,(1,1):6	0:55,1:17	chr3L	-	96571779657177	96609849660984
30	CG4038, CG34396	chr2R:16981261:16987570|16981417:+@chr2R:16987720:16988996:+	a5ss	0.25	0.19	0.32	0.12	0.1	0.15	0.13	1565.83	'chr2R:16981261:16987570|16981417:+@chr2R:16987720:16988996:+.A.coreAndExt_chr2R:16981261:16987570|16981417:+@chr2R:16987720:16988996:+.A.dn','chr2R:16981261:16987570|16981417:+@chr2R:16987720:16988996:+.B.core_chr2R:16981261:16987570|16981417:+@chr2R:16987720:16988996:+.B.dn'	(0,0):11,(0,1):7,(1,0):131,(1,1):98	0:156,1:80	(0,0):25,(0,1):24,(1,0):137,(1,1):199	0:161,1:199	chr2R	+	1698126116981260	1698899616988990
31	RpS20	chr3R:16648524:16648581:+@chr3R:16648854:16649080:+	ri	0.42	0.39	0.45	0.21	0.19	0.23	0.21	1000000000000	'chr3R:16648524:16648581:+@chr3R:16648854:16649080:+.A.withRI','chr3R:16648524:16648581:+@chr3R:16648854:16649080:+.B.up_chr3R:16648524:16648581:+@chr3R:16648854:16649080:+.B.dn'	(0,0):1919,(0,1):198,(1,0):1115,(1,1):468	0:1305,1:476	(0,0):1932,(0,1):233,(1,0):499,(1,1):429	0:575,1:586	chr3R	+	1664852416648520	1664908016649080
32	dl	chr2L:17437419:17438017:-@chr2L:17436830:17437323:-	ri	0.36	0.23	0.52	0.15	0.07	0.26	0.21	3.33	'chr2L:17437419:17438017:-@chr2L:17436830:17437323:-.A.withRI','chr2L:17437419:17438017:-@chr2L:17436830:17437323:-.B.dn_chr2L:17437419:17438017:-@chr2L:17436830:17437323:-.B.up'	(0,0):5,(0,1):9,(1,0):15,(1,1):148	0:51,1:121	(0,0):19,(0,1):16,(1,0):8,(1,1):190	0:21,1:193	chr2L	-	1743683017436830	1743801717438010
33	Tif-IA	chr2L:22250545:22250853:+@chr2L:22253746:22253921:+	ri	0.48	0.33	0.68	0.26	0.19	0.34	0.22	3.25	'chr2L:22250545:22250853:+@chr2L:22253746:22253921:+.A.withRI','chr2L:22250545:22250853:+@chr2L:22253746:22253921:+.B.up_chr2L:22250545:22250853:+@chr2L:22253746:22253921:+.B.dn'	(0,0):111,(1,0):156,(1,1):33	0:168,1:21	(0,0):124,(1,0):178,(1,1):69	0:191,1:56	chr2L	+	2225054522250540	2225392122253920
34	CG31224	chr3R:14485019:14484976|14484482:-@chr3R:14481887:14482907:-	a5ss	0.77	0.6	0.91	0.51	0.41	0.61	0.26	6.53	'chr3R:14485019:14484976|14484482:-@chr3R:14481887:14482907:-.A.dn_chr3R:14485019:14484976|14484482:-@chr3R:14481887:14482907:-.A.coreAndExt','chr3R:14485019:14484976|14484482:-@chr3R:14481887:14482907:-.B.dn_chr3R:14485019:14484976|14484482:-@chr3R:14481887:14482907:-.B.core'	(0,0):80,(1,0):80,(1,1):183	0:215,1:48	(0,0):84,(0,1):23,(1,0):89,(1,1):180	0:204,1:88	chr3R	-	1448188714481880	1448501914485010
35	Axn	chr3R:25857145:25857834:+@chr3R:25858653:25858749:+	ri	0.37	0.2	0.6	0.1	0.05	0.18	0.27	9.79	'chr3R:25857145:25857834:+@chr3R:25858653:25858749:+.A.withRI','chr3R:25857145:25857834:+@chr3R:25858653:25858749:+.B.up_chr3R:25857145:25857834:+@chr3R:25858653:25858749:+.B.dn'	(0,0):26,(0,1):1,(1,0):18,(1,1):35	0:37,1:17	(0,0):26,(0,1):2,(1,0):6,(1,1):50	0:9,1:49	chr3R	+	2585714525857140	2585874925858740
36	mura	chr3R:5375381:5375532:-@chr3R:5372520:5373092:-	ri	0.87	0.69	0.99	0.58	0.48	0.7	0.29	8.01	'chr3R:5375381:5375532:-@chr3R:5372520:5373092:-.A.withRI','chr3R:5375381:5375532:-@chr3R:5372520:5373092:-.B.dn_chr3R:5375381:5375532:-@chr3R:5372520:5373092:-.B.up'	(0,0):64,(1,0):322,(1,1):86	0:399,1:9	(0,0):86,(0,1):1,(1,0):350,(1,1):136	0:431,1:56	chr3R	-	53725205372520	53755325375532
37	wech	chr2R:3375961:3376252:-@chr2R:3373390:3373672:-	ri	0.52	0.38	0.66	0.22	0.15	0.32	0.3	352.37	'chr2R:3375961:3376252:-@chr2R:3373390:3373672:-.A.withRI','chr2R:3375961:3376252:-@chr2R:3373390:3373672:-.B.dn_chr2R:3375961:3376252:-@chr2R:3373390:3373672:-.B.up'	(0,0):10,(0,1):7,(1,0):142,(1,1):28	0:157,1:20	(0,0):13,(0,1):7,(1,0):50,(1,1):28	0:60,1:25	chr2R	-	33733903373390	33762523376252
38	Dg	chr2R:11974436:11975230:-@chr2R:11973732:11973798:-	ri	0.48	0.32	0.68	0.18	0.1	0.27	0.3	89.82	'chr2R:11974436:11975230:-@chr2R:11973732:11973798:-.A.withRI','chr2R:11974436:11975230:-@chr2R:11973732:11973798:-.B.dn_chr2R:11974436:11975230:-@chr2R:11973732:11973798:-.B.up'	(0,0):22,(0,1):3,(1,0):28,(1,1):54	0:51,1:34	(0,0):17,(0,1):5,(1,0):14,(1,1):78	0:23,1:74	chr2R	-	1197373211973730	1197523011975230
39	yin	chrX:3760545:3760750:-@chrX:3759391:3759472:-	ri	0.76	0.48	0.95	0.36	0.23	0.55	0.4	13.39	'chrX:3760545:3760750:-@chrX:3759391:3759472:-.A.withRI','chrX:3760545:3760750:-@chrX:3759391:3759472:-.B.dn_chrX:3760545:3760750:-@chrX:3759391:3759472:-.B.up'	(0,0):21,(1,0):75,(1,1):6	0:80,1:1	(0,0):29,(0,1):8,(1,0):81,(1,1):8	0:87,1:10	chrX	-	37593913759391	37607503760750
40	lt	chr2L:22820170:22820497:+@chr2L:22831506:22831574:+@chr2L:22832086:22832272:+	se	0.8	0.56	0.97	0.21	0.09	0.43	0.59	6229.32	'chr2L:22820170:22820497:+@chr2L:22831506:22831574:+@chr2L:22832086:22832272:+.A.up_chr2L:22820170:22820497:+@chr2L:22831506:22831574:+@chr2L:22832086:22832272:+.A.se_chr2L:22820170:22820497:+@chr2L:22831506:22831574:+@chr2L:22832086:22832272:+.A.dn','chr2L:22820170:22820497:+@chr2L:22831506:22831574:+@chr2L:22832086:22832272:+.B.up_chr2L:22820170:22820497:+@chr2L:22831506:22831574:+@chr2L:228320…	(0,0):500,(1,0):24,(1,1):127	0:108,1:43	(0,0):498,(0,1):2,(1,0):6,(1,1):140	0:35,1:113	chr2L	+	2282017022820170	2283227222832270
41	RhoGEF2	chr2R:12914830:12914844:+@chr2R:12916178:12916526:+	ri	0.84	0.73	0.94	0.13	0.09	0.16	0.71	1000000000000	'chr2R:12914830:12914844:+@chr2R:12916178:12916526:+.A.withRI','chr2R:12914830:12914844:+@chr2R:12916178:12916526:+.B.up_chr2R:12914830:12914844:+@chr2R:12916178:12916526:+.B.dn'	(0,0):58,(0,1):5,(1,0):803,(1,1):81	0:872,1:17	(0,0):45,(0,1):6,(1,0):108,(1,1):98	0:114,1:98	chr2R	+	1291483012914830	1291652612916520
42	RhoGEF2	chr2R:12914830:12914940:+@chr2R:12916178:12916526:+	ri	0.97	0.93	1	0.23	0.17	0.3	0.74	1000000000000	'chr2R:12914830:12914940:+@chr2R:12916178:12916526:+.A.withRI','chr2R:12914830:12914940:+@chr2R:12916178:12916526:+.B.up_chr2R:12914830:12914940:+@chr2R:12916178:12916526:+.B.dn'	(0,0):62,(0,1):1,(1,0):802,(1,1):82	0:883,1:2	(0,0):50,(0,1):1,(1,0):108,(1,1):98	0:131,1:76	chr2R	+	1291483012914830	1291652612916520

## Sheet: V72G
Supplemental Table S14: Splicing pattern changes in SmnV72G mutant.
event_name	type	WT_posterior_mean	WT_ci_low	WT_ci_high	V72G_posterior_mean	V72G_ci_low	V72G_ci_high	diff	bayes_factor	isoforms	WT_counts	WT_assigned_counts	V72G_counts	V72G_assigned_counts	chrom	strand	mRNA_starts	mRNA_ends
chrX:1923874:1923959:-@chrX:1921968:1922060:-	ri	0.13	0.06	0.24	0.76	0.38	0.97	-0.63	4101.04	'chrX:1923874:1923959:-@chrX:1921968:1922060:-.A.withRI','chrX:1923874:1923959:-@chrX:1921968:1922060:-.B.dn_chrX:1923874:1923959:-@chrX:1921968:1922060:-.B.up'	(0,0):67,(0,1):9,(1,0):64	0:64,1:9	(0,0):84,(1,0):87	0.0604167	chrX	-	19219681921968	19239591923959
chr2R:1572309:1572482:-@chr2R:1567271:1568022:-	ri	0.11	0.09	0.13	0.72	0.66	0.77	-0.61	1000000000000	'chr2R:1572309:1572482:-@chr2R:1567271:1568022:-.A.withRI','chr2R:1572309:1572482:-@chr2R:1567271:1568022:-.B.dn_chr2R:1572309:1572482:-@chr2R:1567271:1568022:-.B.up'	(0,0):77,(0,1):42,(1,0):189,(1,1):249	0:221,1:259	(0,0):195,(0,1):35,(1,0):1978,(1,1):323	0:2224,1:112	chr2R	-	15672711567271	15724821572482
chr2R:17545730:17545780:+@chr2R:17545851:17545985:+	ri	0.15	0.01	0.48	0.72	0.3	0.98	-0.57	3.11	'chr2R:17545730:17545780:+@chr2R:17545851:17545985:+.A.withRI','chr2R:17545730:17545780:+@chr2R:17545851:17545985:+.B.up_chr2R:17545730:17545780:+@chr2R:17545851:17545985:+.B.dn'	(0,0):25,(0,1):1,(1,1):4	0:1,1:4	(0,0):46,(1,0):2	0.00138889	chr2R	+	1754573017545730	1754598517545980
chrX:6572573:6572649:-@chrX:6572033:6572230:-	ri	0.32	0.13	0.62	0.87	0.52	1	-0.55	7.22	'chrX:6572573:6572649:-@chrX:6572033:6572230:-.A.withRI','chrX:6572573:6572649:-@chrX:6572033:6572230:-.B.dn_chrX:6572573:6572649:-@chrX:6572033:6572230:-.B.up'	(0,0):19,(0,1):1,(1,0):9,(1,1):8	0:10,1:8	(0,0):26,(1,0):22,(1,1):2	0:23,1:1	chrX	-	65720336572033	65726496572649
chr3L:2477185:2477381:-@chr3L:2476142:2477118:-	ri	0.19	0.05	0.42	0.73	0.44	0.97	-0.54	149.17	'chr3L:2477185:2477381:-@chr3L:2476142:2477118:-.A.withRI','chr3L:2477185:2477381:-@chr3L:2476142:2477118:-.B.dn_chr3L:2477185:2477381:-@chr3L:2476142:2477118:-.B.up'	(0,0):8,(0,1):3,(1,0):2,(1,1):42	0:5,1:42	(0,0):1,(0,1):1,(1,0):6,(1,1):23	0:28,1:2	chr3L	-	24761422476142	24773812477381
chr3R:20644133:20644160:+@chr3R:20644308:20644422:+	ri	0.17	0.06	0.36	0.69	0.34	0.98	-0.52	15.38	'chr3R:20644133:20644160:+@chr3R:20644308:20644422:+.A.withRI','chr3R:20644133:20644160:+@chr3R:20644308:20644422:+.B.up_chr3R:20644133:20644160:+@chr3R:20644308:20644422:+.B.dn'	(0,0):12,(0,1):4,(1,0):6,(1,1):2	0:7,1:5	(0,0):14,(1,0):6	0.00416667	chr3R	+	2064413320644130	2064442220644420
chr3R:17704209:17704299:-@chr3R:17704091:17704141:-	ri	0.27	0.04	0.54	0.79	0.47	0.97	-0.52	8.75	'chr3R:17704209:17704299:-@chr3R:17704091:17704141:-.A.withRI','chr3R:17704209:17704299:-@chr3R:17704091:17704141:-.B.dn_chr3R:17704209:17704299:-@chr3R:17704091:17704141:-.B.up'	(0,0):19,(0,1):2,(1,0):2,(1,1):1	0:3,1:2	(0,0):28,(1,0):13,(1,1):2	0:14,1:1	chr3R	-	1770409117704090	1770429917704290
chr3R:254697:254925:-@chr3R:252604:252722:-	ri	0.31	0.23	0.42	0.82	0.69	0.94	-0.51	1000000000000	'chr3R:254697:254925:-@chr3R:252604:252722:-.A.withRI','chr3R:254697:254925:-@chr3R:252604:252722:-.B.dn_chr3R:254697:254925:-@chr3R:252604:252722:-.B.up'	(0,0):16,(0,1):16,(1,0):148,(1,1):12	0:152,1:24	(0,0):12,(0,1):4,(1,0):333,(1,1):5	0:337,1:5	chr3R	-	252604252604	254925254925
chr3R:7028746:7029507:+@chr3R:7030287:7030553:+	ri	0.3	0.18	0.45	0.81	0.54	0.99	-0.51	24.81	'chr3R:7028746:7029507:+@chr3R:7030287:7030553:+.A.withRI','chr3R:7028746:7029507:+@chr3R:7030287:7030553:+.B.up_chr3R:7028746:7029507:+@chr3R:7030287:7030553:+.B.dn'	(0,0):12,(0,1):1,(1,0):23,(1,1):86	0:49,1:61	(0,0):22,(1,0):34,(1,1):41	0:71,1:4	chr3R	+	70287467028746	70305537030553
chr2R:12093215:12093324:-@chr2R:12092825:12093085:-	ri	0.3	0.07	0.67	0.81	0.48	0.99	-0.51	3.67	'chr2R:12093215:12093324:-@chr2R:12092825:12093085:-.A.withRI','chr2R:12093215:12093324:-@chr2R:12092825:12093085:-.B.dn_chr2R:12093215:12093324:-@chr2R:12092825:12093085:-.B.up'	(0,0):31,(0,1):2,(1,0):2,(1,1):4	0:2,1:6	(0,0):42,(1,0):6,(1,1):5	0:10,1:1	chr2R	-	1209282512092820	1209332412093320
chr2R:12533387:12534610:+@chr2R:12538318:12539492:+	ri	0.29	0.17	0.45	0.79	0.52	0.99	-0.5	20.37	'chr2R:12533387:12534610:+@chr2R:12538318:12539492:+.A.withRI','chr2R:12533387:12534610:+@chr2R:12538318:12539492:+.B.up_chr2R:12533387:12534610:+@chr2R:12538318:12539492:+.B.dn'	(0,0):4,(1,0):24,(1,1):51	0:37,1:38	(1,0):28,(1,1):18	0:44,1:2	chr2R	+	1253338712533380	1253949212539490
chrX:21475741:21475810:-@chrX:21475490:21475619:-	ri	0.29	0.09	0.6	0.79	0.48	0.99	-0.5	6.77	'chrX:21475741:21475810:-@chrX:21475490:21475619:-.A.withRI','chrX:21475741:21475810:-@chrX:21475490:21475619:-.B.dn_chrX:21475741:21475810:-@chrX:21475490:21475619:-.B.up'	(0,0):67,(1,0):4,(1,1):9	0:8,1:5	(0,0):79,(1,0):12,(1,1):1	0.00902778	chrX	-	2147549021475490	2147581021475810
chrX:22411731:22412517:-@chrX:22410757:22411193:-	ri	0.25	0.02	0.55	0.75	0.4	0.98	-0.5	5.97	'chrX:22411731:22412517:-@chrX:22410757:22411193:-.A.withRI','chrX:22411731:22412517:-@chrX:22410757:22411193:-.B.dn_chrX:22411731:22412517:-@chrX:22410757:22411193:-.B.up'	(0,0):6,(0,1):2,(1,0):2,(1,1):19	0:3,1:20	(0,0):6,(1,0):11,(1,1):21	0:28,1:4	chrX	-	2241075722410750	2241251722412510
chr2L:8250583:8250678:-@chr2L:8247060:8250128:-	ri	0.28	0.09	0.61	0.78	0.45	0.99	-0.5	5.95	'chr2L:8250583:8250678:-@chr2L:8247060:8250128:-.A.withRI','chr2L:8250583:8250678:-@chr2L:8247060:8250128:-.B.dn_chr2L:8250583:8250678:-@chr2L:8247060:8250128:-.B.up'	(0,0):4,(1,0):1,(1,1):44	0:34,1:11	(0,0):2,(1,0):7,(1,1):28	0:34,1:1	chr2L	-	82470608247060	82506788250678
chr2L:8157062:8157256:+@chr2L:8157537:8157948:+	ri	0.16	0.08	0.27	0.65	0.47	0.8	-0.49	5.89867e+08	'chr2L:8157062:8157256:+@chr2L:8157537:8157948:+.A.withRI','chr2L:8157062:8157256:+@chr2L:8157537:8157948:+.B.up_chr2L:8157062:8157256:+@chr2L:8157537:8157948:+.B.dn'	(0,0):14,(0,1):16,(1,0):7,(1,1):24	0:11,1:36	(0,0):10,(0,1):6,(1,0):25,(1,1):14	0:34,1:11	chr2L	+	81570628157062	81579488157948
chr3R:7028746:7029507:+@chr3R:7032628:7032860:+	ri	0.33	0.25	0.42	0.82	0.58	0.98	-0.49	693.7	'chr3R:7028746:7029507:+@chr3R:7032628:7032860:+.A.withRI','chr3R:7028746:7029507:+@chr3R:7032628:7032860:+.B.up_chr3R:7028746:7029507:+@chr3R:7032628:7032860:+.B.dn'	(0,0):57,(0,1):4,(1,0):105,(1,1):77	0:126,1:60	(0,0):58,(1,0):100,(1,1):32	0:127,1:5	chr3R	+	70287467028746	70328607032860
chrX:21476179:21476209:-@chrX:21475490:21475619:-	ri	0.08	0.04	0.14	0.57	0.29	0.92	-0.49	198.24	'chrX:21476179:21476209:-@chrX:21475490:21475619:-.A.withRI','chrX:21476179:21476209:-@chrX:21475490:21475619:-.B.dn_chrX:21476179:21476209:-@chrX:21475490:21475619:-.B.up'	(0,0):75,(0,1):5,(1,0):22,(1,1):9	0:23,1:13	(0,0):88,(0,1):1,(1,0):39,(1,1):1	0:39,1:2	chrX	-	2147549021475490	2147620921476200
chr2R:6034564:6034917:-@chr2R:6034396:6034499:-	ri	0.13	0.02	0.33	0.62	0.3	0.86	-0.49	16.62	'chr2R:6034564:6034917:-@chr2R:6034396:6034499:-.A.withRI','chr2R:6034564:6034917:-@chr2R:6034396:6034499:-.B.dn_chr2R:6034564:6034917:-@chr2R:6034396:6034499:-.B.up'	(0,0):11,(0,1):5,(1,0):1,(1,1):20	0:1,1:25	(0,0):5,(0,1):2,(1,0):8,(1,1):17	0:20,1:7	chr2R	-	60343966034396	60349176034917
chr3R:107630:107652:+@chr3R:108396:108556:+	ri	0.16	0.03	0.6	0.65	0.3	0.94	-0.49	6.71	'chr3R:107630:107652:+@chr3R:108396:108556:+.A.withRI','chr3R:107630:107652:+@chr3R:108396:108556:+.B.up_chr3R:107630:107652:+@chr3R:108396:108556:+.B.dn'	(0,0):25,(1,0):11,(1,1):5	0:12,1:4	(0,0):17,(1,0):15	0.0104167	chr3R	+	107630107630	108556108556
chr2R:17520470:17520814:+@chr2R:17520872:17521870:+	ri	0.16	0.01	0.46	0.65	0.37	0.88	-0.49	6.05	'chr2R:17520470:17520814:+@chr2R:17520872:17521870:+.A.withRI','chr2R:17520470:17520814:+@chr2R:17520872:17521870:+.B.up_chr2R:17520470:17520814:+@chr2R:17520872:17521870:+.B.dn'	(0,0):4,(0,1):5,(1,1):31	0:1,1:35	(0,0):4,(0,1):1,(1,0):5,(1,1):30	0:25,1:11	chr2R	+	1752047017520470	1752187017521870
chr3R:8285695:8285937:-@chr3R:8284922:8285625:-	ri	0.13	0.01	0.38	0.62	0.24	0.96	-0.49	5.55	'chr3R:8285695:8285937:-@chr3R:8284922:8285625:-.A.withRI','chr3R:8285695:8285937:-@chr3R:8284922:8285625:-.B.dn_chr3R:8285695:8285937:-@chr3R:8284922:8285625:-.B.up'	(0,0):6,(0,1):1,(1,1):38	0:7,1:32	(0,0):10,(1,0):5,(1,1):45	0:36,1:14	chr3R	-	82849228284922	82859378285937
chrX:11589363:11589417:+@chrX:11589857:11589972:+	ri	0.31	0.11	0.58	0.8	0.39	0.99	-0.49	4.84	'chrX:11589363:11589417:+@chrX:11589857:11589972:+.A.withRI','chrX:11589363:11589417:+@chrX:11589857:11589972:+.B.up_chrX:11589363:11589417:+@chrX:11589857:11589972:+.B.dn'	(0,0):24,(0,1):3,(1,0):17	0:17,1:3	(0,0):21,(1,0):25	0.0173611	chrX	+	1158936311589360	1158997211589970
chr2R:17545613:17545614:+@chr2R:17545851:17545985:+	ri	0.12	0.02	0.62	0.61	0.2	0.95	-0.49	3.41	'chr2R:17545613:17545614:+@chr2R:17545851:17545985:+.A.withRI','chr2R:17545613:17545614:+@chr2R:17545851:17545985:+.B.up_chr2R:17545613:17545614:+@chr2R:17545851:17545985:+.B.dn'	(0,0):26,(0,1):1,(1,0):3,(1,1):4	0:3,1:5	(0,0):55,(1,0):5	0.00347222	chr2R	+	1754561317545610	1754598517545980
chr3L:2948479:2948892:+@chr3L:2953012:2953191:+	ri	0.46	0.29	0.67	0.94	0.81	0.99	-0.48	1.28371e+08	'chr3L:2948479:2948892:+@chr3L:2953012:2953191:+.A.withRI','chr3L:2948479:2948892:+@chr3L:2953012:2953191:+.B.up_chr3L:2948479:2948892:+@chr3L:2953012:2953191:+.B.dn'	(0,0):23,(0,1):4,(1,0):91,(1,1):12	0:95,1:12	(0,0):40,(1,0):265,(1,1):10	0.190972	chr3L	+	29484792948479	29531912953191
chr3L:14030355:14030521:+@chr3L:14030578:14030850:+	ri	0.29	0.11	0.55	0.77	0.58	0.94	-0.48	35.77	'chr3L:14030355:14030521:+@chr3L:14030578:14030850:+.A.withRI','chr3L:14030355:14030521:+@chr3L:14030578:14030850:+.B.up_chr3L:14030355:14030521:+@chr3L:14030578:14030850:+.B.dn'	(0,0):49,(1,0):7,(1,1):114	0:35,1:86	(0,0):57,(1,0):38,(1,1):171	0:166,1:43	chr3L	+	1403035514030350	1403085014030850
chr2R:3213657:3213869:-@chr2R:3212087:3212233:-	ri	0.25	0.12	0.45	0.73	0.38	0.98	-0.48	7.53	'chr2R:3213657:3213869:-@chr2R:3212087:3212233:-.A.withRI','chr2R:3213657:3213869:-@chr2R:3212087:3212233:-.B.dn_chr2R:3213657:3213869:-@chr2R:3212087:3212233:-.B.up'	(0,0):10,(0,1):3,(1,0):20,(1,1):7	0:21,1:9	(0,0):12,(1,0):21,(1,1):1	0.0152778	chr2R	-	32120873212087	32138693213869
chr3L:2477690:2478076:-@chr3L:2477444:2477513:-	ri	0.25	0.07	0.46	0.72	0.48	0.94	-0.47	11.92	'chr3L:2477690:2478076:-@chr3L:2477444:2477513:-.A.withRI','chr3L:2477690:2478076:-@chr3L:2477444:2477513:-.B.dn_chr3L:2477690:2478076:-@chr3L:2477444:2477513:-.B.up'	(0,0):8,(0,1):3,(1,0):5,(1,1):20	0:8,1:20	(0,0):1,(1,0):10,(1,1):11	0:17,1:4	chr3L	-	24774442477444	24780762478076
chrX:8145479:8145717:-@chrX:8145234:8145421:-	ri	0.11	0.03	0.23	0.57	0.31	0.83	-0.46	418.5	'chrX:8145479:8145717:-@chrX:8145234:8145421:-.A.withRI','chrX:8145479:8145717:-@chrX:8145234:8145421:-.B.dn_chrX:8145479:8145717:-@chrX:8145234:8145421:-.B.up'	(0,0):49,(0,1):15,(1,0):2,(1,1):19	0:5,1:31	(0,0):75,(0,1):3,(1,0):9,(1,1):20	0:20,1:12	chrX	-	81452348145234	81457178145717
chr3L:6543943:6543969:+@chr3L:6544864:6545049:+	ri	0.2	0.09	0.4	0.66	0.29	0.99	-0.46	5.41	'chr3L:6543943:6543969:+@chr3L:6544864:6545049:+.A.withRI','chr3L:6543943:6543969:+@chr3L:6544864:6545049:+.B.up_chr3L:6543943:6543969:+@chr3L:6544864:6545049:+.B.dn'	(0,0):13,(1,0):29,(1,1):9	0:31,1:7	(0,0):24,(1,0):57,(1,1):5	0:60,1:2	chr3L	+	65439436543943	65450496545049
chr3L:2368621:2370048:-@chr3L:2368013:2368425:-	ri	0.35	0.23	0.49	0.8	0.68	0.89	-0.45	2469.6	'chr3L:2368621:2370048:-@chr3L:2368013:2368425:-.A.withRI','chr3L:2368621:2370048:-@chr3L:2368013:2368425:-.B.dn_chr3L:2368621:2370048:-@chr3L:2368013:2368425:-.B.up'	(0,0):28,(0,1):9,(1,0):23,(1,1):403	0:202,1:233	(0,0):52,(0,1):7,(1,0):92,(1,1):605	0:619,1:85	chr3L	-	23680132368013	23700482370048
chr3R:11124999:11125069:+@chr3R:11126469:11126544:+	ri	0.07	0.03	0.16	0.52	0.19	0.88	-0.45	10.02	'chr3R:11124999:11125069:+@chr3R:11126469:11126544:+.A.withRI','chr3R:11124999:11125069:+@chr3R:11126469:11126544:+.B.up_chr3R:11124999:11125069:+@chr3R:11126469:11126544:+.B.dn'	(0,0):266,(0,1):6,(1,0):27	0:27,1:6	(0,0):308,(0,1):1,(1,0):35	0:35,1:1	chr3R	+	1112499911124990	1112654411126540
chrX:14804657:14804960:-@chrX:14803828:14804350:-	ri	0.15	0.03	0.35	0.6	0.24	0.97	-0.45	5.32	'chrX:14804657:14804960:-@chrX:14803828:14804350:-.A.withRI','chrX:14804657:14804960:-@chrX:14803828:14804350:-.B.dn_chrX:14804657:14804960:-@chrX:14803828:14804350:-.B.up'	(0,0):1,(0,1):8,(1,0):2,(1,1):22	0:5,1:27	(0,0):2,(0,1):1,(1,0):5,(1,1):13	0:17,1:2	chrX	-	1480382814803820	1480496014804960
chr3R:11173789:11174164:+@chr3R:11174224:11175148:+	ri	0.17	0.05	0.39	0.62	0.29	0.95	-0.45	5.18	'chr3R:11173789:11174164:+@chr3R:11174224:11175148:+.A.withRI','chr3R:11173789:11174164:+@chr3R:11174224:11175148:+.B.up_chr3R:11173789:11174164:+@chr3R:11174224:11175148:+.B.dn'	(0,0):7,(0,1):7,(1,0):1,(1,1):65	0:10,1:63	(0,0):5,(0,1):1,(1,0):5,(1,1):57	0:36,1:27	chr3R	+	1117378911173780	1117514811175140
chr3R:11124999:11125069:+@chr3R:11126470:11126544:+	ri	0.16	0.04	0.39	0.61	0.19	0.91	-0.45	3.44	'chr3R:11124999:11125069:+@chr3R:11126470:11126544:+.A.withRI','chr3R:11124999:11125069:+@chr3R:11126470:11126544:+.B.up_chr3R:11124999:11125069:+@chr3R:11126470:11126544:+.B.dn'	(0,0):269,(0,1):3,(1,0):27	0:27,1:3	(0,0):309,(1,0):35	0.0243056	chr3R	+	1112499911124990	1112654411126540
chr3L:14030355:14030512:+@chr3L:14030578:14030850:+	ri	0.26	0.12	0.47	0.7	0.5	0.88	-0.44	25.86	'chr3L:14030355:14030512:+@chr3L:14030578:14030850:+.A.withRI','chr3L:14030355:14030512:+@chr3L:14030578:14030850:+.B.up_chr3L:14030355:14030512:+@chr3L:14030578:14030850:+.B.dn'	(0,0):49,(1,0):7,(1,1):114	0:47,1:74	(0,0):57,(1,0):39,(1,1):170	0:145,1:64	chr3L	+	1403035514030350	1403085014030850
chr3L:19871933:19872579:+@chr3L:19872645:19872802:+	ri	0.16	0.01	0.58	0.6	0.26	0.95	-0.44	3	'chr3L:19871933:19872579:+@chr3L:19872645:19872802:+.A.withRI','chr3L:19871933:19872579:+@chr3L:19872645:19872802:+.B.up_chr3L:19871933:19872579:+@chr3L:19872645:19872802:+.B.dn'	(0,0):17,(1,1):57	0:5,1:52	(0,0):34,(1,0):5,(1,1):65	0:22,1:48	chr3L	+	1987193319871930	1987280219872800
chr2L:5043269:5043383:+@chr2L:5044307:5044689:+	ri	0.28	0.16	0.45	0.71	0.47	0.94	-0.43	16.22	'chr2L:5043269:5043383:+@chr2L:5044307:5044689:+.A.withRI','chr2L:5043269:5043383:+@chr2L:5044307:5044689:+.B.up_chr2L:5043269:5043383:+@chr2L:5044307:5044689:+.B.dn'	(0,0):22,(0,1):2,(1,0):22,(1,1):24	0:29,1:19	(0,0):18,(1,0):34,(1,1):15	0:43,1:6	chr2L	+	50432695043269	50446895044689
chr2L:199960:199983:+@chr2L:200120:200315:+	ri	0.07	0.01	0.19	0.5	0.15	0.98	-0.43	4.38	'chr2L:199960:199983:+@chr2L:200120:200315:+.A.withRI','chr2L:199960:199983:+@chr2L:200120:200315:+.B.up_chr2L:199960:199983:+@chr2L:200120:200315:+.B.dn'	(0,0):31,(0,1):1,(1,0):1,(1,1):14	0:2,1:14	(0,0):29,(1,0):6,(1,1):6	0.00833333	chr2L	+	199960199960	200315200315
chr3R:4630914:4631449:-@chr3R:4629180:4630848:-	ri	0.1	0	0.31	0.53	0.18	0.92	-0.43	3.41	'chr3R:4630914:4631449:-@chr3R:4629180:4630848:-.A.withRI','chr3R:4630914:4631449:-@chr3R:4629180:4630848:-.B.dn_chr3R:4630914:4631449:-@chr3R:4629180:4630848:-.B.up'	(0,0):1,(0,1):3,(1,1):111	0:10,1:104	(0,0):3,(1,0):2,(1,1):99	0:79,1:22	chr3R	-	46291804629180	46314494631449
chr3L:14030355:14030502:+@chr3L:14030578:14030850:+	ri	0.24	0.11	0.44	0.66	0.45	0.86	-0.42	17.91	'chr3L:14030355:14030502:+@chr3L:14030578:14030850:+.A.withRI','chr3L:14030355:14030502:+@chr3L:14030578:14030850:+.B.up_chr3L:14030355:14030502:+@chr3L:14030578:14030850:+.B.dn'	(0,0):49,(1,0):8,(1,1):113	0:37,1:84	(0,0):57,(1,0):41,(1,1):168	0:132,1:77	chr3L	+	1403035514030350	1403085014030850
chr2R:11735983:11736434:+@chr2R:11739893:11740046:+	ri	0.31	0.2	0.44	0.73	0.45	0.94	-0.42	15.2	'chr2R:11735983:11736434:+@chr2R:11739893:11740046:+.A.withRI','chr2R:11735983:11736434:+@chr2R:11739893:11740046:+.B.up_chr2R:11735983:11736434:+@chr2R:11739893:11740046:+.B.dn'	(0,0):9,(1,0):68,(1,1):28	0:76,1:20	(0,0):5,(1,0):79,(1,1):14	0:87,1:6	chr2R	+	1173598311735980	1174004611740040
chr2R:18801702:18801871:+@chr2R:18802043:18802108:+	ri	0.18	0.06	0.38	0.6	0.27	0.92	-0.42	5.45	'chr2R:18801702:18801871:+@chr2R:18802043:18802108:+.A.withRI','chr2R:18801702:18801871:+@chr2R:18802043:18802108:+.B.up_chr2R:18801702:18801871:+@chr2R:18802043:18802108:+.B.dn'	(0,0):47,(1,0):4,(1,1):12	0:8,1:8	(0,0):37,(0,1):1,(1,0):10,(1,1):3	0:11,1:3	chr2R	+	1880170218801700	1880210818802100
chr2L:17480984:17481046:-@chr2L:17480296:17480919:-	ri	0.4	0.16	0.74	0.82	0.59	0.96	-0.42	5.35	'chr2L:17480984:17481046:-@chr2L:17480296:17480919:-.A.withRI','chr2L:17480984:17481046:-@chr2L:17480296:17480919:-.B.dn_chr2L:17480984:17481046:-@chr2L:17480296:17480919:-.B.up'	(0,0):15,(0,1):1,(1,0):5,(1,1):86	0:71,1:21	(0,0):7,(1,0):18,(1,1):105	0:86,1:37	chr2L	-	1748029617480290	1748104617481040
chr3L:16584104:16584490:-@chr3L:16583452:16583855:-	ri	0.44	0.28	0.61	0.85	0.7	0.98	-0.41	444.24	'chr3L:16584104:16584490:-@chr3L:16583452:16583855:-.A.withRI','chr3L:16584104:16584490:-@chr3L:16583452:16583855:-.B.dn_chr3L:16584104:16584490:-@chr3L:16583452:16583855:-.B.up'	(0,0):10,(0,1):10,(1,0):15,(1,1):24	0:23,1:26	(0,0):14,(0,1):2,(1,0):28,(1,1):22	0:47,1:5	chr3L	-	1658345216583450	1658449016584490
chr3L:11788708:11788771:+@chr3L:11788958:11789721:+	ri	0.51	0.34	0.73	0.92	0.74	1	-0.41	32.95	'chr3L:11788708:11788771:+@chr3L:11788958:11789721:+.A.withRI','chr3L:11788708:11788771:+@chr3L:11788958:11789721:+.B.up_chr3L:11788708:11788771:+@chr3L:11788958:11789721:+.B.dn'	(0,0):21,(0,1):1,(1,0):17,(1,1):93	0:90,1:21	(0,0):23,(1,0):49,(1,1):136	0.128472	chr3L	+	1178870811788700	1178972111789720
chr3R:7417717:7417734:-@chr3R:7416894:7417029:-	ri	0.33	0.18	0.59	0.74	0.5	0.95	-0.41	10.05	'chr3R:7417717:7417734:-@chr3R:7416894:7417029:-.A.withRI','chr3R:7417717:7417734:-@chr3R:7416894:7417029:-.B.dn_chr3R:7417717:7417734:-@chr3R:7416894:7417029:-.B.up'	(0,0):212,(0,1):2,(1,0):137,(1,1):11	0:142,1:8	(0,0):460,(1,0):363,(1,1):13	0:369,1:7	chr3R	-	74168947416894	74177347417734
chr3L:9442789:9442915:+@chr3L:9443118:9443168:+	ri	0.33	0.12	0.61	0.74	0.42	0.97	-0.41	5.43	'chr3L:9442789:9442915:+@chr3L:9443118:9443168:+.A.withRI','chr3L:9442789:9442915:+@chr3L:9443118:9443168:+.B.up_chr3L:9442789:9442915:+@chr3L:9443118:9443168:+.B.dn'	(0,0):25,(0,1):2,(1,0):4	0:4,1:2	(0,0):36,(1,0):12	0.00833333	chr3L	+	94427899442789	94431689443168
chr2L:11165585:11165678:-@chr2L:11163661:11163937:-	ri	0.43	0.19	0.81	0.84	0.61	0.97	-0.41	4.69	'chr2L:11165585:11165678:-@chr2L:11163661:11163937:-.A.withRI','chr2L:11165585:11165678:-@chr2L:11163661:11163937:-.B.dn_chr2L:11165585:11165678:-@chr2L:11163661:11163937:-.B.up'	(0,0):4,(1,0):16,(1,1):5	0.0145833	(0,0):10,(1,0):102,(1,1):9	0.0770833	chr2L	-	1116366111163660	1116567811165670
chr3L:15505116:15505184:+@chr3L:15505272:15505453:+	ri	0.15	0.04	0.37	0.56	0.22	0.91	-0.41	3.67	'chr3L:15505116:15505184:+@chr3L:15505272:15505453:+.A.withRI','chr3L:15505116:15505184:+@chr3L:15505272:15505453:+.B.up_chr3L:15505116:15505184:+@chr3L:15505272:15505453:+.B.dn'	(0,0):24,(0,1):1,(1,0):2,(1,1):17	0:4,1:16	(0,0):26,(0,1):1,(1,0):5,(1,1):8	0:13,1:1	chr3L	+	1550511615505110	1550545315505450
chr2R:4973226:4973325:-@chr2R:4972879:4973169:-	ri	0.53	0.26	0.81	0.93	0.8	1	-0.4	52.62	'chr2R:4973226:4973325:-@chr2R:4972879:4973169:-.A.withRI','chr2R:4973226:4973325:-@chr2R:4972879:4973169:-.B.dn_chr2R:4973226:4973325:-@chr2R:4972879:4973169:-.B.up'	(0,0):9,(0,1):1,(1,0):6,(1,1):13	0:11,1:9	(0,0):12,(1,0):35,(1,1):28	0:59,1:4	chr2R	-	49728794972879	49733254973325
chr3L:2940781:2941624:+@chr3L:2951994:2952046:+	ri	0.47	0.29	0.67	0.87	0.68	0.98	-0.4	40.31	'chr3L:2940781:2941624:+@chr3L:2951994:2952046:+.A.withRI','chr3L:2940781:2941624:+@chr3L:2951994:2952046:+.B.up_chr3L:2940781:2941624:+@chr3L:2951994:2952046:+.B.dn'	(0,0):41,(1,0):130,(1,1):20	0:141,1:9	(0,0):51,(1,0):292,(1,1):18	0:306,1:4	chr3L	+	29407812940781	29520462952046
chr3R:16982214:16982282:+@chr3R:16983160:16983379:+	ri	0.45	0.31	0.66	0.85	0.66	0.97	-0.4	27.23	'chr3R:16982214:16982282:+@chr3R:16983160:16983379:+.A.withRI','chr3R:16982214:16982282:+@chr3R:16983160:16983379:+.B.up_chr3R:16982214:16982282:+@chr3R:16983160:16983379:+.B.dn'	(0,0):42,(1,0):134,(1,1):35	0:156,1:13	(0,0):43,(1,0):184,(1,1):16	0:193,1:7	chr3R	+	1698221416982210	1698337916983370
chr4:692216:692242:+@chr4:701066:701220:+	ri	0.04	0.02	0.08	0.44	0.14	0.92	-0.4	8.51	'chr4:692216:692242:+@chr4:701066:701220:+.A.withRI','chr4:692216:692242:+@chr4:701066:701220:+.B.up_chr4:692216:692242:+@chr4:701066:701220:+.B.dn'	(0,0):13,(1,0):111,(1,1):12	0:112,1:11	(0,0):18,(1,0):193,(1,1):3	0:193,1:3	chr4	+	692216692216	701220701220
chr2R:6778492:6778764:+@chr2R:6778916:6778923:+	ri	0.08	0.01	0.2	0.48	0.2	0.94	-0.4	8.21	'chr2R:6778492:6778764:+@chr2R:6778916:6778923:+.A.withRI','chr2R:6778492:6778764:+@chr2R:6778916:6778923:+.B.up_chr2R:6778492:6778764:+@chr2R:6778916:6778923:+.B.dn'	(0,0):26,(1,0):2,(1,1):26	0:5,1:23	(0,0):27,(1,0):11,(1,1):17	0:15,1:13	chr2R	+	67784926778492	67789236778923
chr3R:4182756:4182817:+@chr3R:4184193:4184312:+	ri	0.2	0.07	0.4	0.6	0.25	0.92	-0.4	3.39	'chr3R:4182756:4182817:+@chr3R:4184193:4184312:+.A.withRI','chr3R:4182756:4182817:+@chr3R:4184193:4184312:+.B.up_chr3R:4182756:4182817:+@chr3R:4184193:4184312:+.B.dn'	(0,0):29,(0,1):4,(1,0):38,(1,1):1	0:38,1:5	(0,0):54,(0,1):1,(1,0):63	0:63,1:1	chr3R	+	41827564182756	41843124184312
chr2R:6406706:6406880:-@chr2R:6403340:6403556:-	ri	0.5	0.34	0.73	0.89	0.72	0.99	-0.39	16.07	'chr2R:6406706:6406880:-@chr2R:6403340:6403556:-.A.withRI','chr2R:6406706:6406880:-@chr2R:6403340:6403556:-.B.dn_chr2R:6406706:6406880:-@chr2R:6403340:6403556:-.B.up'	(0,0):22,(1,0):211,(1,1):27	0:229,1:9	(0,0):19,(1,0):234,(1,1):11	0.170139	chr2R	-	64033406403340	64068806406880
chr3R:1096660:1099804:-@chr3R:1095922:1096586:-	ri	0.24	0.11	0.41	0.63	0.41	0.9	-0.39	11.4	'chr3R:1096660:1099804:-@chr3R:1095922:1096586:-.A.withRI','chr3R:1096660:1099804:-@chr3R:1095922:1096586:-.B.dn_chr3R:1096660:1099804:-@chr3R:1095922:1096586:-.B.up'	(0,0):62,(1,0):6,(1,1):1362	0:282,1:1086	(0,0):60,(1,0):17,(1,1):1376	0:1090,1:303	chr3R	-	10959221095922	10998041099804
chr2R:7573564:7574056:-@chr2R:7572845:7573447:-	ri	0.1	0.01	0.28	0.49	0.25	0.73	-0.39	8.23	'chr2R:7573564:7574056:-@chr2R:7572845:7573447:-.A.withRI','chr2R:7573564:7574056:-@chr2R:7572845:7573447:-.B.dn_chr2R:7573564:7574056:-@chr2R:7572845:7573447:-.B.up'	(0,0):3,(0,1):6,(1,1):24	0:2,1:28	(0,0):3,(0,1):1,(1,0):5,(1,1):22	0:16,1:12	chr2R	-	75728457572845	75740567574056
chr3R:191424:191612:+@chr3R:191671:191932:+	ri	0.08	0.01	0.28	0.47	0.25	0.71	-0.39	7.53	'chr3R:191424:191612:+@chr3R:191671:191932:+.A.withRI','chr3R:191424:191612:+@chr3R:191671:191932:+.B.up_chr3R:191424:191612:+@chr3R:191671:191932:+.B.dn'	(0,0):6,(0,1):6,(1,1):12	0:1,1:17	(0,0):7,(0,1):3,(1,0):7,(1,1):11	0:10,1:11	chr3R	+	191424191424	191932191932
chr2R:2942096:2942441:+@chr2R:2943107:2943280:+	ri	0.27	0.13	0.45	0.66	0.38	0.9	-0.39	5.01	'chr2R:2942096:2942441:+@chr2R:2943107:2943280:+.A.withRI','chr2R:2942096:2942441:+@chr2R:2943107:2943280:+.B.up_chr2R:2942096:2942441:+@chr2R:2943107:2943280:+.B.dn'	(0,0):8,(0,1):8,(1,0):11,(1,1):6	0:12,1:13	(0,0):3,(0,1):2,(1,0):15,(1,1):3	0:16,1:4	chr2R	+	29420962942096	29432802943280
chr2R:1250568:1250611:-@chr2R:1250133:1250260:-	ri	0.35	0.18	0.59	0.74	0.42	0.96	-0.39	3.43	'chr2R:1250568:1250611:-@chr2R:1250133:1250260:-.A.withRI','chr2R:1250568:1250611:-@chr2R:1250133:1250260:-.B.dn_chr2R:1250568:1250611:-@chr2R:1250133:1250260:-.B.up'	(0,0):65,(0,1):2,(1,0):33,(1,1):8	0:33,1:10	(0,0):67,(1,0):49,(1,1):4	0:51,1:2	chr2R	-	12501331250133	12506111250611
chr3R:20112003:20112449:+@chr3R:20112514:20112668:+	ri	0.12	0.04	0.25	0.5	0.38	0.62	-0.38	3.44235e+09	'chr3R:20112003:20112449:+@chr3R:20112514:20112668:+.A.withRI','chr3R:20112003:20112449:+@chr3R:20112514:20112668:+.B.up_chr3R:20112003:20112449:+@chr3R:20112514:20112668:+.B.dn'	(0,0):22,(0,1):23,(1,0):6,(1,1):102	0:22,1:109	(0,0):34,(0,1):18,(1,0):38,(1,1):148	0:118,1:86	chr3R	+	2011200320112000	2011266820112660
chr3R:8812510:8813078:+@chr3R:8814328:8815746:+	ri	0.37	0.28	0.47	0.75	0.64	0.86	-0.38	1.89899e+07	'chr3R:8812510:8813078:+@chr3R:8814328:8815746:+.A.withRI','chr3R:8812510:8813078:+@chr3R:8814328:8815746:+.B.up_chr3R:8812510:8813078:+@chr3R:8814328:8815746:+.B.dn'	(0,0):46,(0,1):5,(1,0):70,(1,1):262	0:149,1:188	(0,0):53,(0,1):6,(1,0):173,(1,1):282	0:366,1:95	chr3R	+	88125108812510	88157468815746
chr4:691873:692013:+@chr4:701066:701220:+	ri	0.12	0.07	0.2	0.5	0.25	0.85	-0.38	13.06	'chr4:691873:692013:+@chr4:701066:701220:+.A.withRI','chr4:691873:692013:+@chr4:701066:701220:+.B.up_chr4:691873:692013:+@chr4:701066:701220:+.B.dn'	(0,0):20,(0,1):2,(1,0):134,(1,1):12	0:135,1:13	(0,0):32,(0,1):1,(1,0):217,(1,1):4	0:220,1:2	chr4	+	691873691873	701220701220
chr3L:3903004:3903138:-@chr3L:3902527:3902707:-	ri	0.36	0.19	0.62	0.74	0.56	0.89	-0.38	10.98	'chr3L:3903004:3903138:-@chr3L:3902527:3902707:-.A.withRI','chr3L:3903004:3903138:-@chr3L:3902527:3902707:-.B.dn_chr3L:3903004:3903138:-@chr3L:3902527:3902707:-.B.up'	(0,0):250,(0,1):1,(1,0):19,(1,1):21	0:29,1:12	(0,0):386,(0,1):3,(1,0):66,(1,1):19	0:79,1:9	chr3L	-	39025273902527	39031383903138
chr2R:17151950:17152038:+@chr2R:17158266:17158419:+	ri	0.42	0.21	0.69	0.8	0.57	0.97	-0.38	5.97	'chr2R:17151950:17152038:+@chr2R:17158266:17158419:+.A.withRI','chr2R:17151950:17152038:+@chr2R:17158266:17158419:+.B.up_chr2R:17151950:17152038:+@chr2R:17158266:17158419:+.B.dn'	(0,0):6,(0,1):3,(1,0):227,(1,1):1	0:227,1:4	(0,0):33,(0,1):1,(1,0):719	0:719,1:1	chr2R	+	1715195017151950	1715841917158410
chr3L:4130389:4130643:-@chr3L:4126989:4127162:-	ri	0.4	0.22	0.7	0.78	0.47	0.97	-0.38	3.49	'chr3L:4130389:4130643:-@chr3L:4126989:4127162:-.A.withRI','chr3L:4130389:4130643:-@chr3L:4126989:4127162:-.B.dn_chr3L:4130389:4130643:-@chr3L:4126989:4127162:-.B.up'	(0,0):58,(0,1):2,(1,0):71,(1,1):11	0:75,1:9	(0,0):86,(1,0):81,(1,1):7	0:86,1:2	chr3L	-	41269894126989	41306434130643
chr3R:13523703:13523884:-@chr3R:13523387:13523608:-	ri	0.48	0.17	0.76	0.86	0.59	0.98	-0.38	3.1	'chr3R:13523703:13523884:-@chr3R:13523387:13523608:-.A.withRI','chr3R:13523703:13523884:-@chr3R:13523387:13523608:-.B.dn_chr3R:13523703:13523884:-@chr3R:13523387:13523608:-.B.up'	(0,0):18,(0,1):1,(1,0):6,(1,1):16	0:6,1:17	(0,0):32,(1,0):13,(1,1):13	0:23,1:3	chr3R	-	1352338713523380	1352388413523880
chr2R:5434524:5434554:-@chr2R:5434231:5434457:-	ri	0.25	0.04	0.7	0.63	0.3	0.96	-0.38	3.07	'chr2R:5434524:5434554:-@chr2R:5434231:5434457:-.A.withRI','chr2R:5434524:5434554:-@chr2R:5434231:5434457:-.B.dn_chr2R:5434524:5434554:-@chr2R:5434231:5434457:-.B.up'	(0,0):5,(1,0):2,(1,1):19	0:14,1:7	(0,0):3,(1,0):8,(1,1):18	0:25,1:1	chr2R	-	54342315434231	54345545434554
chr2L:7182707:7182899:+@chr2L:7183503:7183665:+	ri	0.09	0.04	0.18	0.46	0.22	0.8	-0.37	14.18	'chr2L:7182707:7182899:+@chr2L:7183503:7183665:+.A.withRI','chr2L:7182707:7182899:+@chr2L:7183503:7183665:+.B.up_chr2L:7182707:7182899:+@chr2L:7183503:7183665:+.B.dn'	(0,0):32,(0,1):1,(1,0):8,(1,1):24	0:12,1:21	(0,0):53,(1,0):23,(1,1):16	0:32,1:7	chr2L	+	71827077182707	71836657183665
chrX:18303917:18304168:-@chrX:18302551:18302975:-	ri	0.08	0.02	0.22	0.44	0.24	0.69	-0.36	25.38	'chrX:18303917:18304168:-@chrX:18302551:18302975:-.A.withRI','chrX:18303917:18304168:-@chrX:18302551:18302975:-.B.dn_chrX:18303917:18304168:-@chrX:18302551:18302975:-.B.up'	(0,0):12,(0,1):1,(1,0):2,(1,1):21	0:6,1:18	(0,0):14,(0,1):2,(1,0):13,(1,1):12	0:20,1:7	chrX	-	1830255118302550	1830416818304160
chr2R:20235735:20235983:+@chr2R:20262938:20263289:+	ri	0.43	0.3	0.61	0.79	0.65	0.89	-0.36	11.7	'chr2R:20235735:20235983:+@chr2R:20262938:20263289:+.A.withRI','chr2R:20235735:20235983:+@chr2R:20262938:20263289:+.B.up_chr2R:20235735:20235983:+@chr2R:20262938:20263289:+.B.dn'	(0,0):11,(0,1):8,(1,0):707,(1,1):11	0:711,1:15	(0,0):32,(0,1):5,(1,0):1986,(1,1):13	0:1998,1:6	chr2R	+	2023573520235730	2026328920263280
chr3R:16774437:16774551:+@chr3R:16787937:16788017:+	ri	0.27	0.14	0.47	0.63	0.32	0.9	-0.36	3.19	'chr3R:16774437:16774551:+@chr3R:16787937:16788017:+.A.withRI','chr3R:16774437:16774551:+@chr3R:16787937:16788017:+.B.up_chr3R:16774437:16774551:+@chr3R:16787937:16788017:+.B.dn'	(0,0):176,(0,1):4,(1,0):482	0:482,1:4	(0,0):167,(0,1):1,(1,0):518	0:518,1:1	chr3R	+	1677443716774430	1678801716788010
chrX:10227749:10227784:+@chrX:10229839:10230484:+	ri	0.44	0.31	0.59	0.79	0.62	0.92	-0.35	37.7	'chrX:10227749:10227784:+@chrX:10229839:10230484:+.A.withRI','chrX:10227749:10227784:+@chrX:10229839:10230484:+.B.up_chrX:10227749:10227784:+@chrX:10229839:10230484:+.B.dn'	(0,0):24,(0,1):3,(1,0):107,(1,1):52	0:129,1:33	(0,0):33,(0,1):1,(1,0):192,(1,1):50	0:232,1:11	chrX	+	1022774910227740	1023048410230480
chr2L:21643764:21644219:+@chr2L:21646595:21647967:+	ri	0.49	0.31	0.71	0.84	0.7	0.94	-0.35	10.07	'chr2L:21643764:21644219:+@chr2L:21646595:21647967:+.A.withRI','chr2L:21643764:21644219:+@chr2L:21646595:21647967:+.B.up_chr2L:21643764:21644219:+@chr2L:21646595:21647967:+.B.dn'	(0,0):3,(0,1):1,(1,0):38,(1,1):55	0:70,1:24	(0,0):2,(0,1):2,(1,0):108,(1,1):63	0:158,1:15	chr2L	+	2164376421643760	2164796721647960
chr2R:9336724:9336792:-@chr2R:9334637:9334833:-	ri	0.27	0.16	0.45	0.62	0.36	0.87	-0.35	4.74	'chr2R:9336724:9336792:-@chr2R:9334637:9334833:-.A.withRI','chr2R:9336724:9336792:-@chr2R:9334637:9334833:-.B.dn_chr2R:9336724:9336792:-@chr2R:9334637:9334833:-.B.up'	(0,0):59,(1,0):93,(1,1):17	0:95,1:15	(0,0):76,(1,0):171,(1,1):12	0:182,1:1	chr2R	-	93346379334637	93367929336792
chr3R:11895227:11895277:-@chr3R:11894444:11895068:-	ri	0.37	0.2	0.58	0.72	0.5	0.97	-0.35	4.12	'chr3R:11895227:11895277:-@chr3R:11894444:11895068:-.A.withRI','chr3R:11895227:11895277:-@chr3R:11894444:11895068:-.B.dn_chr3R:11895227:11895277:-@chr3R:11894444:11895068:-.B.up'	(0,0):34,(1,0):15,(1,1):133	0:64,1:84	(0,0):31,(1,0):40,(1,1):169	0:145,1:64	chr3R	-	1189444411894440	1189527711895270
chr2L:3466160:3466228:+@chr2L:3466316:3466416:+	ri	0.51	0.3	0.73	0.86	0.67	0.97	-0.35	4.12	'chr2L:3466160:3466228:+@chr2L:3466316:3466416:+.A.withRI','chr2L:3466160:3466228:+@chr2L:3466316:3466416:+.B.up_chr2L:3466160:3466228:+@chr2L:3466316:3466416:+.B.dn'	(0,0):19,(0,1):5,(1,0):14	0:14,1:5	(0,0):19,(0,1):1,(1,0):31	0:31,1:1	chr2L	+	34661603466160	34664163466416
chr3L:18790637:18791905:-@chr3L:18756429:18756962:-	ri	0.53	0.48	0.59	0.87	0.8	0.94	-0.34	1000000000000	'chr3L:18790637:18791905:-@chr3L:18756429:18756962:-.A.withRI','chr3L:18790637:18791905:-@chr3L:18756429:18756962:-.B.dn_chr3L:18790637:18791905:-@chr3L:18756429:18756962:-.B.up'	(0,0):386,(0,1):10,(1,0):4329,(1,1):368	0:4570,1:137	(0,0):194,(0,1):4,(1,0):3889,(1,1):179	0:4051,1:21	chr3L	-	1875642918756420	1879190518791900
chr3L:2368630:2370048:-@chr3L:2368013:2368425:-	ri	0.29	0.19	0.39	0.63	0.55	0.72	-0.34	8.90721e+06	'chr3L:2368630:2370048:-@chr3L:2368013:2368425:-.A.withRI','chr3L:2368630:2370048:-@chr3L:2368013:2368425:-.B.dn_chr3L:2368630:2370048:-@chr3L:2368013:2368425:-.B.up'	(0,0):12,(0,1):25,(1,0):26,(1,1):400	0:129,1:322	(0,0):30,(0,1):29,(1,0):103,(1,1):594	0:532,1:194	chr3L	-	23680132368013	23700482370048
chr2L:9430023:9430429:-@chr2L:9429412:9429589:-	ri	0.56	0.44	0.68	0.9	0.83	0.95	-0.34	3.44718e+06	'chr2L:9430023:9430429:-@chr2L:9429412:9429589:-.A.withRI','chr2L:9430023:9430429:-@chr2L:9429412:9429589:-.B.dn_chr2L:9430023:9430429:-@chr2L:9429412:9429589:-.B.up'	(0,0):13,(0,1):17,(1,0):65,(1,1):30	0:76,1:36	(0,0):36,(0,1):7,(1,0):178,(1,1):32	0:209,1:8	chr2L	-	94294129429412	94304299430429
chr3L:3052634:3052856:+@chr3L:3052934:3053027:+	ri	0.08	0.02	0.18	0.42	0.22	0.65	-0.34	60.94	'chr3L:3052634:3052856:+@chr3L:3052934:3053027:+.A.withRI','chr3L:3052634:3052856:+@chr3L:3052934:3053027:+.B.up_chr3L:3052634:3052856:+@chr3L:3052934:3053027:+.B.dn'	(0,0):11,(0,1):12,(1,0):2,(1,1):18	0:4,1:28	(0,0):10,(0,1):3,(1,0):10,(1,1):12	0:14,1:11	chr3L	+	30526343052634	30530273053027
chr2L:110755:110877:+@chr2L:111038:111117:+	ri	0.14	0.03	0.33	0.48	0.25	0.74	-0.34	7.57	'chr2L:110755:110877:+@chr2L:111038:111117:+.A.withRI','chr2L:110755:110877:+@chr2L:111038:111117:+.B.up_chr2L:110755:110877:+@chr2L:111038:111117:+.B.dn'	(0,0):39,(1,0):4,(1,1):9	0:4,1:9	(0,0):45,(1,0):12,(1,1):4	0:12,1:4	chr2L	+	110755110755	111117111117
chr3R:10971040:10971294:-@chr3R:10969988:10970961:-	ri	0.06	0.02	0.14	0.4	0.17	0.69	-0.34	5.94	'chr3R:10971040:10971294:-@chr3R:10969988:10970961:-.A.withRI','chr3R:10971040:10971294:-@chr3R:10969988:10970961:-.B.dn_chr3R:10971040:10971294:-@chr3R:10969988:10970961:-.B.up'	(0,0):63,(0,1):14,(1,0):2,(1,1):376	0:14,1:378	(0,0):22,(1,0):6,(1,1):180	0:113,1:73	chr3R	-	1096998810969980	1097129410971290
chr2R:4802033:4802512:+@chr2R:4802570:4805741:+	ri	0.13	0.03	0.34	0.47	0.26	0.73	-0.34	5.68	'chr2R:4802033:4802512:+@chr2R:4802570:4805741:+.A.withRI','chr2R:4802033:4802512:+@chr2R:4802570:4805741:+.B.up_chr2R:4802033:4802512:+@chr2R:4802570:4805741:+.B.dn'	(0,0):2,(0,1):9,(1,0):1,(1,1):249	0:25,1:234	(0,0):8,(0,1):3,(1,0):7,(1,1):287	0:127,1:170	chr2R	+	48020334802033	48057414805741
chr3R:19812343:19812668:+@chr3R:19812754:19812932:+	ri	0.33	0.19	0.53	0.67	0.5	0.81	-0.34	5.65	'chr3R:19812343:19812668:+@chr3R:19812754:19812932:+.A.withRI','chr3R:19812343:19812668:+@chr3R:19812754:19812932:+.B.up_chr3R:19812343:19812668:+@chr3R:19812754:19812932:+.B.dn'	(0,0):133,(0,1):6,(1,0):8,(1,1):35	0:16,1:33	(0,0):125,(0,1):5,(1,0):28,(1,1):45	0:62,1:16	chr3R	+	1981234319812340	1981293219812930
chr2R:11749144:11749484:-@chr2R:11748106:11748258:-	ri	0.19	0.08	0.42	0.53	0.26	0.82	-0.34	4.15	'chr2R:11749144:11749484:-@chr2R:11748106:11748258:-.A.withRI','chr2R:11749144:11749484:-@chr2R:11748106:11748258:-.B.dn_chr2R:11749144:11749484:-@chr2R:11748106:11748258:-.B.up'	(0,0):19,(0,1):5,(1,0):10,(1,1):13	0:10,1:18	(0,0):17,(0,1):2,(1,0):17,(1,1):5	0:18,1:6	chr2R	-	1174810611748100	1174948411749480
chr2R:19289150:19289425:-@chr2R:19287882:19288100:-	ri	0.05	0.01	0.2	0.39	0.13	0.85	-0.34	3.74	'chr2R:19289150:19289425:-@chr2R:19287882:19288100:-.A.withRI','chr2R:19289150:19289425:-@chr2R:19287882:19288100:-.B.dn_chr2R:19289150:19289425:-@chr2R:19287882:19288100:-.B.up'	(0,0):10,(0,1):5,(1,0):1,(1,1):7	0:2,1:11	(0,0):11,(0,1):2,(1,0):7,(1,1):5	0:7,1:7	chr2R	-	1928788219287880	1928942519289420
chr2L:3466052:3466111:-@chr2L:3463707:3465918:-	ri	0.23	0.05	0.44	0.57	0.37	0.8	-0.34	3.57	'chr2L:3466052:3466111:-@chr2L:3463707:3465918:-.A.withRI','chr2L:3466052:3466111:-@chr2L:3463707:3465918:-.B.dn_chr2L:3466052:3466111:-@chr2L:3463707:3465918:-.B.up'	(0,0):8,(0,1):3,(1,0):3,(1,1):210	0:52,1:164	(0,0):12,(0,1):3,(1,0):16,(1,1):302	0:136,1:185	chr2L	-	34637073463707	34661113466111
chr4:282200:282350:+@chr4:282403:282688:+	ri	0.3	0.13	0.58	0.64	0.42	0.89	-0.34	3.57	'chr4:282200:282350:+@chr4:282403:282688:+.A.withRI','chr4:282200:282350:+@chr4:282403:282688:+.B.up_chr4:282200:282350:+@chr4:282403:282688:+.B.dn'	(0,0):3,(0,1):6,(1,0):5,(1,1):23	0:12,1:22	(0,0):4,(0,1):2,(1,0):11,(1,1):21	0:29,1:5	chr4	+	282200282200	282688282688
chr3L:19595142:19595160:+@chr3L:19595771:19597220:+	ri	0.16	0.04	0.35	0.49	0.25	0.74	-0.33	3.55	'chr3L:19595142:19595160:+@chr3L:19595771:19597220:+.A.withRI','chr3L:19595142:19595160:+@chr3L:19595771:19597220:+.B.up_chr3L:19595142:19595160:+@chr3L:19595771:19597220:+.B.dn'	(0,0):5,(1,0):3,(1,1):53	0:5,1:51	(0,0):4,(1,0):10,(1,1):52	0:47,1:15	chr3L	+	1959514219595140	1959722019597220
chrX:1760242:1760528:+@chrX:1760596:1760920:+	ri	0.08	0.02	0.23	0.41	0.2	0.68	-0.33	3.18	'chrX:1760242:1760528:+@chrX:1760596:1760920:+.A.withRI','chrX:1760242:1760528:+@chrX:1760596:1760920:+.B.up_chrX:1760242:1760528:+@chrX:1760596:1760920:+.B.dn'	(0,0):5,(0,1):12,(1,0):1,(1,1):38	0:3,1:48	(0,0):9,(0,1):6,(1,0):7,(1,1):28	0:19,1:22	chrX	+	17602421760242	17609201760920
chr3R:1069560:1069976:-@chr3R:1065214:1065341:-	ri	0.28	0.24	0.33	0.6	0.52	0.68	-0.32	1000000000000	'chr3R:1069560:1069976:-@chr3R:1065214:1065341:-.A.withRI','chr3R:1069560:1069976:-@chr3R:1065214:1065341:-.B.dn_chr3R:1069560:1069976:-@chr3R:1065214:1065341:-.B.up'	(0,0):109,(0,1):27,(1,0):651,(1,1):151	0:690,1:139	(0,0):242,(0,1):23,(1,0):1138,(1,1):97	0:1199,1:59	chr3R	-	10652141065214	10699761069976
chr3L:2444499:2446101:+@chr3L:2459591:2460153:+	ri	0.23	0.2	0.26	0.55	0.51	0.6	-0.32	1000000000000	'chr3L:2444499:2446101:+@chr3L:2459591:2460153:+.A.withRI','chr3L:2444499:2446101:+@chr3L:2459591:2460153:+.B.up_chr3L:2444499:2446101:+@chr3L:2459591:2460153:+.B.dn'	(0,0):42,(0,1):24,(1,0):722,(1,1):425	0:819,1:352	(0,0):58,(0,1):27,(1,0):2199,(1,1):515	0:2464,1:277	chr3L	+	24444992444499	24601532460153
chr2R:17986487:17987019:-@chr2R:17979647:17980222:-	ri	0.5	0.4	0.62	0.82	0.61	0.96	-0.32	6.35	'chr2R:17986487:17987019:-@chr2R:17979647:17980222:-.A.withRI','chr2R:17986487:17987019:-@chr2R:17979647:17980222:-.B.dn_chr2R:17986487:17987019:-@chr2R:17979647:17980222:-.B.up'	(0,0):58,(1,0):307,(1,1):90	0:364,1:33	(0,0):17,(1,0):233,(1,1):38	0:261,1:10	chr2R	-	1797964717979640	1798701917987010
chr3L:4490828:4490947:-@chr3L:4490644:4490742:-	ri	0.23	0.15	0.31	0.55	0.31	0.78	-0.32	5.71	'chr3L:4490828:4490947:-@chr3L:4490644:4490742:-.A.withRI','chr3L:4490828:4490947:-@chr3L:4490644:4490742:-.B.dn_chr3L:4490828:4490947:-@chr3L:4490644:4490742:-.B.up'	(0,0):27,(0,1):25,(1,0):30,(1,1):28	0:31,1:52	(0,0):4,(0,1):2,(1,0):11,(1,1):3	0:11,1:5	chr3L	-	44906444490644	44909474490947
chr2R:18802818:18802903:+@chr2R:18802968:18804237:+	ri	0.14	0.04	0.3	0.46	0.23	0.75	-0.32	4.07	'chr2R:18802818:18802903:+@chr2R:18802968:18804237:+.A.withRI','chr2R:18802818:18802903:+@chr2R:18802968:18804237:+.B.up_chr2R:18802818:18802903:+@chr2R:18802968:18804237:+.B.dn'	(0,0):27,(1,0):3,(1,1):493	0:73,1:423	(0,0):29,(1,0):9,(1,1):382	0:130,1:261	chr2R	+	1880281818802810	1880423718804230
chr3L:19595142:19595160:+@chr3L:19595756:19597220:+	ri	0.15	0.04	0.29	0.47	0.22	0.79	-0.32	3.92	'chr3L:19595142:19595160:+@chr3L:19595756:19597220:+.A.withRI','chr3L:19595142:19595160:+@chr3L:19595756:19597220:+.B.up_chr3L:19595142:19595160:+@chr3L:19595756:19597220:+.B.dn'	(0,0):3,(0,1):2,(1,0):3,(1,1):53	0:6,1:52	(0,0):4,(1,0):10,(1,1):52	0:38,1:24	chr3L	+	1959514219595140	1959722019597220
chr3R:1105331:1105660:-@chr3R:1100688:1100809:-	ri	0.66	0.56	0.77	0.97	0.93	0.99	-0.31	1000000000000	'chr3R:1105331:1105660:-@chr3R:1100688:1100809:-.A.withRI','chr3R:1105331:1105660:-@chr3R:1100688:1100809:-.B.dn_chr3R:1105331:1105660:-@chr3R:1100688:1100809:-.B.up'	(0,0):51,(0,1):13,(1,0):917,(1,1):36	0:939,1:27	(0,0):67,(0,1):3,(1,0):2437,(1,1):22	0:2459,1:3	chr3R	-	11006881100688	11056601105660
chr3R:25598998:25599543:+@chr3R:25607413:25607565:+	ri	0.31	0.23	0.41	0.62	0.47	0.77	-0.31	37.26	'chr3R:25598998:25599543:+@chr3R:25607413:25607565:+.A.withRI','chr3R:25598998:25599543:+@chr3R:25607413:25607565:+.B.up_chr3R:25598998:25599543:+@chr3R:25607413:25607565:+.B.dn'	(0,0):20,(0,1):1,(1,0):265,(1,1):55	0:273,1:48	(0,0):33,(1,0):576,(1,1):61	0:616,1:21	chr3R	+	2559899825598990	2560756525607560
chr3L:1798788:1798953:+@chr3L:1799010:1800699:+	ri	0.61	0.41	0.79	0.92	0.79	0.99	-0.31	7.63	'chr3L:1798788:1798953:+@chr3L:1799010:1800699:+.A.withRI','chr3L:1798788:1798953:+@chr3L:1799010:1800699:+.B.up_chr3L:1798788:1798953:+@chr3L:1799010:1800699:+.B.dn'	(0,0):14,(0,1):5,(1,0):18,(1,1):207	0:163,1:67	(0,0):19,(1,0):29,(1,1):267	0:283,1:13	chr3L	+	17987881798788	18006991800699
chrX:18303917:18304168:-@chrX:18302551:18302892:-	ri	0.09	0.03	0.21	0.4	0.2	0.69	-0.31	5.68	'chrX:18303917:18304168:-@chrX:18302551:18302892:-.A.withRI','chrX:18303917:18304168:-@chrX:18302551:18302892:-.B.dn_chrX:18303917:18304168:-@chrX:18302551:18302892:-.B.up'	(0,0):9,(0,1):4,(1,0):5,(1,1):18	0:5,1:22	(0,0):13,(0,1):3,(1,0):14,(1,1):11	0:16,1:12	chrX	-	1830255118302550	1830416818304160
chr2R:15129679:15129900:+@chr2R:15130209:15130364:+	ri	0.21	0.11	0.35	0.52	0.3	0.79	-0.31	3.37	'chr2R:15129679:15129900:+@chr2R:15130209:15130364:+.A.withRI','chr2R:15129679:15129900:+@chr2R:15130209:15130364:+.B.up_chr2R:15129679:15129900:+@chr2R:15130209:15130364:+.B.dn'	(0,0):88,(0,1):7,(1,0):13,(1,1):25	0:20,1:25	(0,0):83,(0,1):2,(1,0):23,(1,1):19	0:34,1:10	chr2R	+	1512967915129670	1513036415130360
chr2R:8824243:8824601:+@chr2R:8825905:8825980:+	ri	0.57	0.47	0.69	0.87	0.8	0.93	-0.3	13464	'chr2R:8824243:8824601:+@chr2R:8825905:8825980:+.A.withRI','chr2R:8824243:8824601:+@chr2R:8825905:8825980:+.B.up_chr2R:8824243:8824601:+@chr2R:8825905:8825980:+.B.dn'	(0,0):29,(0,1):14,(1,0):228,(1,1):34	0:246,1:30	(0,0):22,(0,1):9,(1,0):500,(1,1):21	0:518,1:12	chr2R	+	88242438824243	88259808825980
chrX:15483658:15483964:-@chrX:15481143:15481556:-	ri	0.3	0.22	0.41	0.59	0.45	0.75	-0.29	20.43	'chrX:15483658:15483964:-@chrX:15481143:15481556:-.A.withRI','chrX:15483658:15483964:-@chrX:15481143:15481556:-.B.dn_chrX:15483658:15483964:-@chrX:15481143:15481556:-.B.up'	(0,0):17,(0,1):14,(1,0):71,(1,1):36	0:81,1:40	(0,0):17,(0,1):6,(1,0):97,(1,1):24	0:112,1:15	chrX	-	1548114315481140	1548396415483960
chr3L:8353893:8354031:-@chr3L:8351656:8351815:-	ri	0.34	0.22	0.48	0.63	0.43	0.84	-0.29	5.01	'chr3L:8353893:8354031:-@chr3L:8351656:8351815:-.A.withRI','chr3L:8353893:8354031:-@chr3L:8351656:8351815:-.B.dn_chr3L:8353893:8354031:-@chr3L:8351656:8351815:-.B.up'	(0,0):12,(0,1):8,(1,0):109,(1,1):4	0:110,1:11	(0,0):22,(0,1):4,(1,0):136	0:136,1:4	chr3L	-	83516568351656	83540318354031
chr2R:8671854:8672247:+@chr2R:8686765:8687295:+	ri	0.15	0.13	0.17	0.43	0.38	0.49	-0.28	1000000000000	'chr2R:8671854:8672247:+@chr2R:8686765:8687295:+.A.withRI','chr2R:8671854:8672247:+@chr2R:8686765:8687295:+.B.up_chr2R:8671854:8672247:+@chr2R:8686765:8687295:+.B.dn'	(0,0):37,(0,1):65,(1,0):805,(1,1):191	0:823,1:238	(0,0):71,(0,1):45,(1,0):2145,(1,1):167	0:2215,1:142	chr2R	+	86718548671854	86872958687295
chr2L:19701750:19702034:+@chr2L:19714889:19714989:+	ri	0.36	0.26	0.49	0.64	0.52	0.77	-0.28	72.15	'chr2L:19701750:19702034:+@chr2L:19714889:19714989:+.A.withRI','chr2L:19701750:19702034:+@chr2L:19714889:19714989:+.B.up_chr2L:19701750:19702034:+@chr2L:19714889:19714989:+.B.dn'	(0,0):19,(0,1):10,(1,0):728,(1,1):15	0:732,1:21	(0,0):47,(0,1):8,(1,0):2170,(1,1):28	0:2189,1:17	chr2L	+	1970175019701750	1971498919714980
chr2R:15283370:15283477:-@chr2R:15283192:15283282:-	ri	0.66	0.44	0.89	0.94	0.82	0.99	-0.28	3.12	'chr2R:15283370:15283477:-@chr2R:15283192:15283282:-.A.withRI','chr2R:15283370:15283477:-@chr2R:15283192:15283282:-.B.dn_chr2R:15283370:15283477:-@chr2R:15283192:15283282:-.B.up'	(0,0):27,(0,1):1,(1,0):18,(1,1):3	0:19,1:3	(0,0):63,(0,1):1,(1,0):50	0:50,1:1	chr2R	-	1528319215283190	1528347715283470
chrX:14840304:14840514:-@chrX:14829909:14830451:-	ri	0.19	0.16	0.22	0.46	0.41	0.51	-0.27	1000000000000	'chrX:14840304:14840514:-@chrX:14829909:14830451:-.A.withRI','chrX:14840304:14840514:-@chrX:14829909:14830451:-.B.dn_chrX:14840304:14840514:-@chrX:14829909:14830451:-.B.up'	(0,0):45,(0,1):50,(1,0):678,(1,1):139	0:719,1:148	(0,0):64,(0,1):58,(1,0):2250,(1,1):166	0:2341,1:133	chrX	-	1482990914829900	1484051414840510
chr2R:8824243:8824594:+@chr2R:8825905:8825980:+	ri	0.56	0.45	0.69	0.83	0.75	0.9	-0.27	380.05	'chr2R:8824243:8824594:+@chr2R:8825905:8825980:+.A.withRI','chr2R:8824243:8824594:+@chr2R:8825905:8825980:+.B.up_chr2R:8824243:8824594:+@chr2R:8825905:8825980:+.B.dn'	(0,0):28,(0,1):15,(1,0):229,(1,1):33	0:252,1:25	(0,0):19,(0,1):12,(1,0):500,(1,1):21	0:518,1:15	chr2R	+	88242438824243	88259808825980
chr2R:5094925:5095164:+@chr2R:5095257:5095355:+	ri	0.3	0.18	0.43	0.57	0.43	0.7	-0.27	10.83	'chr2R:5094925:5095164:+@chr2R:5095257:5095355:+.A.withRI','chr2R:5094925:5095164:+@chr2R:5095257:5095355:+.B.up_chr2R:5094925:5095164:+@chr2R:5095257:5095355:+.B.dn'	(0,0):24,(1,0):24,(1,1):78	0:39,1:63	(0,0):24,(1,0):62,(1,1):80	0:97,1:45	chr2R	+	50949255094925	50953555095355
chr3L:19841270:19841498:+@chr3L:19851478:19851592:+	ri	0.13	0.1	0.16	0.39	0.33	0.46	-0.26	1000000000000	'chr3L:19841270:19841498:+@chr3L:19851478:19851592:+.A.withRI','chr3L:19841270:19841498:+@chr3L:19851478:19851592:+.B.up_chr3L:19841270:19841498:+@chr3L:19851478:19851592:+.B.dn'	(0,0):33,(0,1):57,(1,0):795,(1,1):25	0:799,1:78	(0,0):53,(0,1):40,(1,0):2330,(1,1):23	0:2343,1:50	chr3L	+	1984127019841270	1985159219851590
chr3L:3902248:3902316:+@chr3L:3903465:3903911:+	ri	0.23	0.18	0.3	0.49	0.37	0.64	-0.26	2547.02	'chr3L:3902248:3902316:+@chr3L:3903465:3903911:+.A.withRI','chr3L:3902248:3902316:+@chr3L:3903465:3903911:+.B.up_chr3L:3902248:3902316:+@chr3L:3903465:3903911:+.B.dn'	(0,0):282,(1,0):101,(1,1):122	0:128,1:95	(0,0):407,(1,0):165,(1,1):97	0:215,1:47	chr3L	+	39022483902248	39039113903911
chr3L:19540218:19540329:-@chr3L:19538409:19538620:-	ri	0.38	0.29	0.49	0.64	0.55	0.73	-0.26	373.88	'chr3L:19540218:19540329:-@chr3L:19538409:19538620:-.A.withRI','chr3L:19540218:19540329:-@chr3L:19538409:19538620:-.B.dn_chr3L:19540218:19540329:-@chr3L:19538409:19538620:-.B.up'	(0,0):137,(0,1):23,(1,0):227,(1,1):8	0:232,1:26	(0,0):270,(0,1):23,(1,0):692,(1,1):19	0:701,1:33	chr3L	-	1953840919538400	1954032919540320
chr2L:8463627:8463990:-@chr2L:8450794:8451004:-	ri	0.65	0.52	0.79	0.91	0.83	0.97	-0.26	40.01	'chr2L:8463627:8463990:-@chr2L:8450794:8451004:-.A.withRI','chr2L:8463627:8463990:-@chr2L:8450794:8451004:-.B.dn_chr2L:8463627:8463990:-@chr2L:8450794:8451004:-.B.up'	(0,0):18,(0,1):5,(1,0):686,(1,1):16	0:696,1:11	(0,0):39,(0,1):3,(1,0):2098,(1,1):20	0:2117,1:4	chr2L	-	84507948450794	84639908463990
chr2L:2730126:2730469:+@chr2L:2736174:2736430:+	ri	0.14	0.1	0.2	0.4	0.25	0.63	-0.26	15.1	'chr2L:2730126:2730469:+@chr2L:2736174:2736430:+.A.withRI','chr2L:2730126:2730469:+@chr2L:2736174:2736430:+.B.up_chr2L:2730126:2730469:+@chr2L:2736174:2736430:+.B.dn'	(0,0):24,(0,1):9,(1,0):94,(1,1):37	0:101,1:39	(0,0):17,(0,1):2,(1,0):103,(1,1):16	0:106,1:15	chr2L	+	27301262730126	27364302736430
chr2R:6778492:6778764:+@chr2R:6778913:6778923:+	ri	0.07	0.02	0.16	0.33	0.16	0.54	-0.26	9.54	'chr2R:6778492:6778764:+@chr2R:6778913:6778923:+.A.withRI','chr2R:6778492:6778764:+@chr2R:6778913:6778923:+.B.up_chr2R:6778492:6778764:+@chr2R:6778913:6778923:+.B.dn'	(0,0):23,(0,1):3,(1,0):2,(1,1):26	0:3,1:28	(0,0):24,(0,1):3,(1,0):11,(1,1):17	0:19,1:12	chr2R	+	67784926778492	67789236778923
chr2R:1248524:1249054:-@chr2R:1247831:1248451:-	ri	0.35	0.22	0.49	0.61	0.47	0.75	-0.26	7.11	'chr2R:1248524:1249054:-@chr2R:1247831:1248451:-.A.withRI','chr2R:1248524:1249054:-@chr2R:1247831:1248451:-.B.dn_chr2R:1248524:1249054:-@chr2R:1247831:1248451:-.B.up'	(0,0):122,(0,1):5,(1,0):18,(1,1):446	0:194,1:275	(0,0):132,(0,1):2,(1,0):44,(1,1):585	0:484,1:147	chr2R	-	12478311247831	12490541249054
chr3L:8974910:8974992:+@chr3L:8975814:8976312:+	ri	0.14	0.08	0.23	0.4	0.21	0.66	-0.26	3.5	'chr3L:8974910:8974992:+@chr3L:8975814:8976312:+.A.withRI','chr3L:8974910:8974992:+@chr3L:8975814:8976312:+.B.up_chr3L:8974910:8974992:+@chr3L:8975814:8976312:+.B.dn'	(0,0):2,(0,1):9,(1,0):15,(1,1):40	0:20,1:44	(0,0):7,(0,1):2,(1,0):13,(1,1):13	0:15,1:13	chr3L	+	89749108974910	89763128976312
chr3L:9411444:9411824:-@chr3L:9408508:9408566:-	ri	0.63	0.51	0.77	0.88	0.8	0.95	-0.25	25.86	'chr3L:9411444:9411824:-@chr3L:9408508:9408566:-.A.withRI','chr3L:9411444:9411824:-@chr3L:9408508:9408566:-.B.dn_chr3L:9411444:9411824:-@chr3L:9408508:9408566:-.B.up'	(0,0):263,(0,1):4,(1,0):682,(1,1):81	0:739,1:28	(0,0):591,(0,1):4,(1,0):1877,(1,1):140	0:2002,1:19	chr3L	-	94085089408508	94118249411824
chr2L:155366:155429:+@chr2L:155546:155784:+	ri	0.44	0.34	0.54	0.69	0.59	0.79	-0.25	18.88	'chr2L:155366:155429:+@chr2L:155546:155784:+.A.withRI','chr2L:155366:155429:+@chr2L:155546:155784:+.B.up_chr2L:155366:155429:+@chr2L:155546:155784:+.B.dn'	(0,0):135,(0,1):9,(1,0):67,(1,1):74	0:92,1:58	(0,0):126,(0,1):8,(1,0):113,(1,1):67	0:146,1:42	chr2L	+	155366155366	155784155784
chr2L:155366:155429:+@chr2L:155494:155784:+	ri	0.53	0.4	0.67	0.78	0.66	0.89	-0.25	14.47	'chr2L:155366:155429:+@chr2L:155494:155784:+.A.withRI','chr2L:155366:155429:+@chr2L:155494:155784:+.B.up_chr2L:155366:155429:+@chr2L:155494:155784:+.B.dn'	(0,0):143,(0,1):1,(1,0):46,(1,1):95	0:92,1:50	(0,0):132,(0,1):2,(1,0):73,(1,1):107	0:141,1:41	chr2L	+	155366155366	155784155784
chr3L:16849016:16849084:+@chr3L:16849397:16852050:+	ri	0.18	0.07	0.31	0.43	0.27	0.62	-0.25	6.72	'chr3L:16849016:16849084:+@chr3L:16849397:16852050:+.A.withRI','chr3L:16849016:16849084:+@chr3L:16849397:16852050:+.B.up_chr3L:16849016:16849084:+@chr3L:16849397:16852050:+.B.dn'	(0,0):20,(1,0):7,(1,1):381	0:78,1:310	(0,0):19,(0,1):1,(1,0):25,(1,1):475	0:161,1:340	chr3L	+	1684901616849010	1685205016852050
chrX:11589857:11589972:+@chrX:11590436:11590573:+	ri	0.24	0.16	0.33	0.49	0.34	0.67	-0.25	6.22	'chrX:11589857:11589972:+@chrX:11590436:11590573:+.A.withRI','chrX:11589857:11589972:+@chrX:11590436:11590573:+.B.up_chrX:11589857:11589972:+@chrX:11590436:11590573:+.B.dn'	(0,0):61,(0,1):23,(1,0):53,(1,1):1	0:53,1:24	(0,0):61,(0,1):9,(1,0):65,(1,1):1	0:65,1:10	chrX	+	1158985711589850	1159057311590570
chrX:12797111:12797286:-@chrX:12796349:12796999:-	ri	0.09	0.02	0.2	0.34	0.14	0.6	-0.25	4.4	'chrX:12797111:12797286:-@chrX:12796349:12796999:-.A.withRI','chrX:12797111:12797286:-@chrX:12796349:12796999:-.B.dn_chrX:12797111:12797286:-@chrX:12796349:12796999:-.B.up'	(0,0):15,(0,1):5,(1,0):2,(1,1):126	0:13,1:120	(0,0):25,(0,1):2,(1,0):6,(1,1):81	0:81,1:8	chrX	-	1279634912796340	1279728612797280
chr2L:1175047:1175173:+@chr2L:1175287:1175523:+	ri	0.23	0.12	0.37	0.48	0.32	0.63	-0.25	3.05	'chr2L:1175047:1175173:+@chr2L:1175287:1175523:+.A.withRI','chr2L:1175047:1175173:+@chr2L:1175287:1175523:+.B.up_chr2L:1175047:1175173:+@chr2L:1175287:1175523:+.B.dn'	(0,0):19,(0,1):9,(1,0):9,(1,1):18	0:13,1:23	(0,0):18,(0,1):12,(1,0):23,(1,1):9	0:26,1:18	chr2L	+	11750471175047	11755231175523
chr2R:12491634:12491750:-@chr2R:12485409:12485768:-	ri	0.71	0.62	0.8	0.95	0.91	0.97	-0.24	3804.2	'chr2R:12491634:12491750:-@chr2R:12485409:12485768:-.A.withRI','chr2R:12491634:12491750:-@chr2R:12485409:12485768:-.B.dn_chr2R:12491634:12491750:-@chr2R:12485409:12485768:-.B.up'	(0,0):26,(0,1):17,(1,0):1105,(1,1):12	0:1113,1:21	(0,0):25,(0,1):7,(1,0):3143,(1,1):7	0:3150,1:7	chr2R	-	1248540912485400	1249175012491750
chr2R:5094925:5095164:+@chr2R:5095253:5095355:+	ri	0.19	0.12	0.27	0.43	0.32	0.56	-0.24	16.73	'chr2R:5094925:5095164:+@chr2R:5095253:5095355:+.A.withRI','chr2R:5094925:5095164:+@chr2R:5095253:5095355:+.B.up_chr2R:5094925:5095164:+@chr2R:5095253:5095355:+.B.dn'	(0,0):15,(0,1):9,(1,0):19,(1,1):83	0:26,1:85	(0,0):19,(0,1):5,(1,0):51,(1,1):91	0:83,1:64	chr2R	+	50949255094925	50953555095355
chrX:6978632:6978852:-@chrX:6975022:6975087:-	ri	0.31	0.23	0.41	0.55	0.41	0.72	-0.24	5.42	'chrX:6978632:6978852:-@chrX:6975022:6975087:-.A.withRI','chrX:6978632:6978852:-@chrX:6975022:6975087:-.B.dn_chrX:6978632:6978852:-@chrX:6975022:6975087:-.B.up'	(0,0):59,(0,1):12,(1,0):516,(1,1):28	0:528,1:28	(0,0):51,(0,1):5,(1,0):547,(1,1):17	0:553,1:16	chrX	-	69750226975022	69788526978852
chr3R:18994039:18994107:+@chr3R:18995618:18996206:+	ri	0.11	0.07	0.17	0.35	0.18	0.61	-0.24	4.52	'chr3R:18994039:18994107:+@chr3R:18995618:18996206:+.A.withRI','chr3R:18994039:18994107:+@chr3R:18995618:18996206:+.B.up_chr3R:18994039:18994107:+@chr3R:18995618:18996206:+.B.dn'	(0,0):12,(0,1):4,(1,0):22,(1,1):56	0:29,1:53	(0,0):5,(0,1):1,(1,0):19,(1,1):16	0:29,1:7	chr3R	+	1899403918994030	1899620618996200
chr3L:21914003:21914087:+@chr3L:21914193:21914427:+	ri	0.46	0.34	0.58	0.7	0.54	0.92	-0.24	3.06	'chr3L:21914003:21914087:+@chr3L:21914193:21914427:+.A.withRI','chr3L:21914003:21914087:+@chr3L:21914193:21914427:+.B.up_chr3L:21914003:21914087:+@chr3L:21914193:21914427:+.B.dn'	(0,0):77,(0,1):3,(1,0):54,(1,1):85	0:81,1:61	(0,0):60,(1,0):57,(1,1):57	0:91,1:23	chr3L	+	2191400321914000	2191442721914420
chr3R:4646264:4646441:-@chr3R:4643363:4644985:-	ri	0.56	0.5	0.62	0.79	0.7	0.89	-0.23	1350.51	'chr3R:4646264:4646441:-@chr3R:4643363:4644985:-.A.withRI','chr3R:4646264:4646441:-@chr3R:4643363:4644985:-.B.dn_chr3R:4646264:4646441:-@chr3R:4643363:4644985:-.B.up'	(0,0):224,(0,1):3,(1,0):454,(1,1):997	0:999,1:455	(0,0):224,(1,0):534,(1,1):857	0:1238,1:153	chr3R	-	46433634643363	46464414646441
chr3R:11895449:11895758:-@chr3R:11894444:11895068:-	ri	0.53	0.42	0.66	0.76	0.67	0.84	-0.23	8.22	'chr3R:11895449:11895758:-@chr3R:11894444:11895068:-.A.withRI','chr3R:11895449:11895758:-@chr3R:11894444:11895068:-.B.dn_chr3R:11895449:11895758:-@chr3R:11894444:11895068:-.B.up'	(0,0):64,(0,1):13,(1,0):69,(1,1):171	0:156,1:97	(0,0):53,(0,1):16,(1,0):169,(1,1):233	0:336,1:82	chr3R	-	1189444411894440	1189575811895750
chr3R:18917585:18917683:+@chr3R:18917778:18918269:+	ri	0.02	0	0.08	0.25	0.08	0.45	-0.23	6.56	'chr3R:18917585:18917683:+@chr3R:18917778:18918269:+.A.withRI','chr3R:18917585:18917683:+@chr3R:18917778:18918269:+.B.up_chr3R:18917585:18917683:+@chr3R:18917778:18918269:+.B.dn'	(0,0):36,(0,1):8,(1,1):129	0:5,1:132	(0,0):19,(0,1):1,(1,0):4,(1,1):65	0:25,1:45	chr3R	+	1891758518917580	1891826918918260
chr3R:22427636:22428661:+@chr3R:22429282:22429640:+	ri	0.58	0.47	0.73	0.81	0.67	0.94	-0.23	4.27	'chr3R:22427636:22428661:+@chr3R:22429282:22429640:+.A.withRI','chr3R:22427636:22428661:+@chr3R:22429282:22429640:+.B.up_chr3R:22427636:22428661:+@chr3R:22429282:22429640:+.B.dn'	(0,0):42,(1,0):92,(1,1):307	0:286,1:113	(0,0):15,(1,0):142,(1,1):335	0:406,1:71	chr3R	+	2242763622427630	2242964022429640
chrX:19532913:19533109:+@chrX:19533178:19533426:+	ri	0.57	0.43	0.72	0.8	0.67	0.89	-0.23	4.25	'chrX:19532913:19533109:+@chrX:19533178:19533426:+.A.withRI','chrX:19532913:19533109:+@chrX:19533178:19533426:+.B.up_chrX:19532913:19533109:+@chrX:19533178:19533426:+.B.dn'	(0,0):14,(0,1):11,(1,0):37,(1,1):70	0:80,1:38	(0,0):26,(0,1):6,(1,0):69,(1,1):84	0:131,1:28	chrX	+	1953291319532910	1953342619533420
chr2R:17210671:17211056:-@chr2R:17210013:17210574:-	ri	0.69	0.5	0.85	0.92	0.8	0.99	-0.23	4.12	'chr2R:17210671:17211056:-@chr2R:17210013:17210574:-.A.withRI','chr2R:17210671:17211056:-@chr2R:17210013:17210574:-.B.dn_chr2R:17210671:17211056:-@chr2R:17210013:17210574:-.B.up'	(0,0):5,(0,1):1,(1,0):21,(1,1):32	0:38,1:16	(0,0):3,(1,0):24,(1,1):41	0:63,1:2	chr2R	-	1721001317210010	1721105617211050
chr4:631911:632064:+@chr4:634241:634421:+	ri	0.3	0.22	0.41	0.53	0.38	0.73	-0.23	3.88	'chr4:631911:632064:+@chr4:634241:634421:+.A.withRI','chr4:631911:632064:+@chr4:634241:634421:+.B.up_chr4:631911:632064:+@chr4:634241:634421:+.B.dn'	(0,0):126,(1,0):226,(1,1):48	0:237,1:37	(0,0):136,(1,0):272,(1,1):35	0:284,1:23	chr4	+	631911631911	634421634421
chr2L:7275360:7277438:-@chr2L:7256762:7257260:-	ri	0.21	0.17	0.25	0.43	0.37	0.49	-0.22	1000000000000	'chr2L:7275360:7277438:-@chr2L:7256762:7257260:-.A.withRI','chr2L:7275360:7277438:-@chr2L:7256762:7257260:-.B.dn_chr2L:7275360:7277438:-@chr2L:7256762:7257260:-.B.up'	(0,0):26,(0,1):8,(1,0):299,(1,1):178	0:334,1:151	(0,0):82,(0,1):10,(1,0):676,(1,1):190	0:753,1:123	chr2L	-	72567627256762	72774387277438
chr2R:18944932:18945156:+@chr2R:18946578:18946816:+	ri	0.05	0.04	0.08	0.27	0.18	0.38	-0.22	9.64887e+06	'chr2R:18944932:18945156:+@chr2R:18946578:18946816:+.A.withRI','chr2R:18944932:18945156:+@chr2R:18946578:18946816:+.B.up_chr2R:18944932:18945156:+@chr2R:18946578:18946816:+.B.dn'	(0,0):39,(0,1):37,(1,0):26,(1,1):47	0:27,1:83	(0,0):46,(0,1):13,(1,0):67,(1,1):29	0:76,1:33	chr2R	+	1894493218944930	1894681618946810
chr3R:4646265:4646441:-@chr3R:4643363:4644985:-	ri	0.56	0.5	0.63	0.78	0.7	0.88	-0.22	92.59	'chr3R:4646265:4646441:-@chr3R:4643363:4644985:-.A.withRI','chr3R:4646265:4646441:-@chr3R:4643363:4644985:-.B.dn_chr3R:4646265:4646441:-@chr3R:4643363:4644985:-.B.up'	(0,0):224,(0,1):3,(1,0):454,(1,1):997	0:1061,1:393	(0,0):224,(1,0):536,(1,1):855	0:1193,1:198	chr3R	-	46433634643363	46464414646441
chr3L:16567625:16567852:+@chr3L:16567953:16568076:+	ri	0.36	0.26	0.47	0.58	0.49	0.67	-0.22	17.99	'chr3L:16567625:16567852:+@chr3L:16567953:16568076:+.A.withRI','chr3L:16567625:16567852:+@chr3L:16567953:16568076:+.B.up_chr3L:16567625:16567852:+@chr3L:16567953:16568076:+.B.dn'	(0,0):48,(0,1):28,(1,0):39,(1,1):20	0:44,1:43	(0,0):86,(0,1):21,(1,0):93,(1,1):36	0:103,1:47	chr3L	+	1656762516567620	1656807616568070
chrX:13612162:13612316:-@chrX:13601629:13601747:-	ri	0.52	0.41	0.63	0.74	0.63	0.84	-0.22	8.47	'chrX:13612162:13612316:-@chrX:13601629:13601747:-.A.withRI','chrX:13612162:13612316:-@chrX:13601629:13601747:-.B.dn_chrX:13612162:13612316:-@chrX:13601629:13601747:-.B.up'	(0,0):1423,(0,1):19,(1,0):2702,(1,1):3	0:2704,1:20	(0,0):2243,(0,1):12,(1,0):4580,(1,1):5	0:4584,1:13	chrX	-	1360162913601620	1361231613612310
chr3R:1389264:1389342:-@chr3R:1388687:1389094:-	ri	0.08	0.02	0.18	0.3	0.17	0.49	-0.22	4.07	'chr3R:1389264:1389342:-@chr3R:1388687:1389094:-.A.withRI','chr3R:1389264:1389342:-@chr3R:1388687:1389094:-.B.dn_chr3R:1389264:1389342:-@chr3R:1388687:1389094:-.B.up'	(0,0):16,(0,1):4,(1,0):2,(1,1):43	0:5,1:44	(0,0):13,(0,1):4,(1,0):13,(1,1):45	0:19,1:43	chr3R	-	13886871388687	13893421389342
chr3L:19840635:19840703:+@chr3L:19851478:19851592:+	ri	0.2	0.12	0.31	0.42	0.28	0.58	-0.22	3.9	'chr3L:19840635:19840703:+@chr3L:19851478:19851592:+.A.withRI','chr3L:19840635:19840703:+@chr3L:19851478:19851592:+.B.up_chr3L:19840635:19840703:+@chr3L:19851478:19851592:+.B.dn'	(0,0):92,(0,1):10,(1,0):832,(1,1):1	0:832,1:11	(0,0):103,(0,1):10,(1,0):2381	0:2381,1:10	chr3L	+	1984063519840630	1985159219851590
chr2R:20290094:20290245:-@chr2R:20289186:20289331:-	ri	0.32	0.21	0.45	0.54	0.4	0.7	-0.22	3.27	'chr2R:20290094:20290245:-@chr2R:20289186:20289331:-.A.withRI','chr2R:20290094:20290245:-@chr2R:20289186:20289331:-.B.dn_chr2R:20290094:20290245:-@chr2R:20289186:20289331:-.B.up'	(0,0):28,(0,1):13,(1,0):62,(1,1):7	0:65,1:17	(0,0):54,(0,1):10,(1,0):105,(1,1):3	0:105,1:13	chr2R	-	2028918620289180	2029024520290240
chr3R:11895585:11895758:-@chr3R:11894444:11895068:-	ri	0.44	0.35	0.53	0.65	0.57	0.72	-0.21	120.06	'chr3R:11895585:11895758:-@chr3R:11894444:11895068:-.A.withRI','chr3R:11895585:11895758:-@chr3R:11894444:11895068:-.B.dn_chr3R:11895585:11895758:-@chr3R:11894444:11895068:-.B.up'	(0,0):45,(0,1):32,(1,0):99,(1,1):141	0:157,1:115	(0,0):38,(0,1):31,(1,0):211,(1,1):191	0:328,1:105	chr3R	-	1189444411894440	1189575811895750
chr2R:14244597:14244766:-@chr2R:14243036:14243560:-	ri	0.43	0.35	0.51	0.64	0.54	0.75	-0.21	28.63	'chr2R:14244597:14244766:-@chr2R:14243036:14243560:-.A.withRI','chr2R:14244597:14244766:-@chr2R:14243036:14243560:-.B.dn_chr2R:14244597:14244766:-@chr2R:14243036:14243560:-.B.up'	(0,0):78,(0,1):30,(1,0):144,(1,1):84	0:162,1:96	(0,0):66,(0,1):17,(1,0):186,(1,1):73	0:239,1:37	chr2R	-	1424303614243030	1424476614244760
chr2L:11803785:11803898:-@chr2L:11803284:11803674:-	ri	0.25	0.18	0.33	0.46	0.37	0.55	-0.21	26.11	'chr2L:11803785:11803898:-@chr2L:11803284:11803674:-.A.withRI','chr2L:11803785:11803898:-@chr2L:11803284:11803674:-.B.dn_chr2L:11803785:11803898:-@chr2L:11803284:11803674:-.B.up'	(0,0):47,(0,1):32,(1,0):36,(1,1):177	0:55,1:190	(0,0):59,(0,1):17,(1,0):67,(1,1):179	0:150,1:113	chr2L	-	1180328411803280	1180389811803890
chr2L:4333926:4334110:+@chr2L:4336450:4336957:+	ri	0.29	0.21	0.38	0.5	0.36	0.67	-0.21	3.86	'chr2L:4333926:4334110:+@chr2L:4336450:4336957:+.A.withRI','chr2L:4333926:4334110:+@chr2L:4336450:4336957:+.B.up_chr2L:4333926:4334110:+@chr2L:4336450:4336957:+.B.dn'	(0,0):14,(0,1):7,(1,0):83,(1,1):50	0:101,1:39	(0,0):31,(0,1):3,(1,0):128,(1,1):51	0:154,1:28	chr2L	+	43339264333926	43369574336957
chr3L:4150222:4150391:+@chr3L:4150464:4150722:+	ri	0.06	0.01	0.15	0.27	0.12	0.49	-0.21	3.2	'chr3L:4150222:4150391:+@chr3L:4150464:4150722:+.A.withRI','chr3L:4150222:4150391:+@chr3L:4150464:4150722:+.B.up_chr3L:4150222:4150391:+@chr3L:4150464:4150722:+.B.dn'	(0,0):8,(0,1):13,(1,0):1,(1,1):22	0:2,1:34	(0,0):17,(0,1):6,(1,0):5,(1,1):20	0:8,1:23	chr3L	+	41502224150222	41507224150722
chr2L:58081:58182:-@chr2L:39301:39857:-	ri	0.35	0.31	0.39	0.55	0.47	0.63	-0.2	1.06375e+06	'chr2L:58081:58182:-@chr2L:39301:39857:-.A.withRI','chr2L:58081:58182:-@chr2L:39301:39857:-.B.dn_chr2L:58081:58182:-@chr2L:39301:39857:-.B.up'	(0,0):117,(0,1):46,(1,0):3478,(1,1):183	0:3551,1:156	(0,0):75,(0,1):20,(1,0):3009,(1,1):95	0:3054,1:70	chr2L	-	3930139301	5818258182
chr3L:178022:178305:-@chr3L:177382:177873:-	ri	0.72	0.62	0.82	0.92	0.83	0.98	-0.2	13.91	'chr3L:178022:178305:-@chr3L:177382:177873:-.A.withRI','chr3L:178022:178305:-@chr3L:177382:177873:-.B.dn_chr3L:178022:178305:-@chr3L:177382:177873:-.B.up'	(0,0):81,(0,1):9,(1,0):95,(1,1):270	0:267,1:107	(0,0):57,(0,1):2,(1,0):85,(1,1):187	0:254,1:20	chr3L	-	177382177382	178305178305
chr2L:7402905:7402985:+@chr2L:7403229:7403361:+	ri	0.45	0.42	0.48	0.64	0.61	0.67	-0.19	1000000000000	'chr2L:7402905:7402985:+@chr2L:7403229:7403361:+.A.withRI','chr2L:7402905:7402985:+@chr2L:7403229:7403361:+.B.up_chr2L:7402905:7402985:+@chr2L:7403229:7403361:+.B.dn'	(0,0):156,(0,1):312,(1,0):1549,(1,1):44	0:1570,1:335	(0,0):163,(0,1):184,(1,0):1918,(1,1):33	0:1940,1:195	chr2L	+	74029057402905	74033617403361
chr2R:8449361:8449541:+@chr2R:8450189:8450322:+	ri	0.19	0.13	0.27	0.38	0.3	0.48	-0.19	24.74	'chr2R:8449361:8449541:+@chr2R:8450189:8450322:+.A.withRI','chr2R:8449361:8449541:+@chr2R:8450189:8450322:+.B.up_chr2R:8449361:8449541:+@chr2R:8450189:8450322:+.B.dn'	(0,0):33,(0,1):26,(1,0):42,(1,1):3	0:44,1:27	(0,0):37,(0,1):30,(1,0):132,(1,1):8	0:136,1:34	chr2R	+	84493618449361	84503228450322
chrX:13281219:13281436:-@chrX:13280848:13281065:-	ri	0.21	0.14	0.29	0.4	0.3	0.52	-0.19	12.11	'chrX:13281219:13281436:-@chrX:13280848:13281065:-.A.withRI','chrX:13281219:13281436:-@chrX:13280848:13281065:-.B.dn_chrX:13281219:13281436:-@chrX:13280848:13281065:-.B.up'	(0,0):37,(0,1):16,(1,0):26,(1,1):68	0:31,1:79	(0,0):43,(0,1):12,(1,0):40,(1,1):63	0:63,1:52	chrX	-	1328084813280840	1328143613281430
chrX:21497340:21497917:-@chrX:21496181:21497297:-	ri	0.03	0	0.11	0.22	0.11	0.36	-0.19	7.78	'chrX:21497340:21497917:-@chrX:21496181:21497297:-.A.withRI','chrX:21497340:21497917:-@chrX:21496181:21497297:-.B.dn_chrX:21497340:21497917:-@chrX:21496181:21497297:-.B.up'	(0,0):84,(0,1):2,(1,1):500	0:2,1:500	(0,0):95,(0,1):2,(1,0):8,(1,1):642	0:96,1:556	chrX	-	2149618121496180	2149791721497910
chr3R:1112624:1112931:-@chr3R:1100688:1100809:-	ri	0.52	0.41	0.63	0.71	0.62	0.8	-0.19	4.4	'chr3R:1112624:1112931:-@chr3R:1100688:1100809:-.A.withRI','chr3R:1112624:1112931:-@chr3R:1100688:1100809:-.B.dn_chr3R:1112624:1112931:-@chr3R:1100688:1100809:-.B.up'	(0,0):97,(0,1):14,(1,0):1590,(1,1):32	0:1606,1:30	(0,0):97,(0,1):16,(1,0):3005,(1,1):26	0:3025,1:22	chr3R	-	11006881100688	11129311112931
chr2L:13370842:13371110:-@chr2L:13370219:13370564:-	ri	0.6	0.51	0.69	0.79	0.68	0.89	-0.19	4.33	'chr2L:13370842:13371110:-@chr2L:13370219:13370564:-.A.withRI','chr2L:13370842:13371110:-@chr2L:13370219:13370564:-.B.dn_chr2L:13370842:13371110:-@chr2L:13370219:13370564:-.B.up'	(0,0):140,(0,1):25,(1,0):127,(1,1):165	0:233,1:84	(0,0):177,(0,1):6,(1,0):138,(1,1):190	0:287,1:47	chr2L	-	1337021913370210	1337111013371110
chr3R:25703649:25705532:+@chr3R:25722420:25722927:+	ri	0.21	0.19	0.24	0.39	0.36	0.43	-0.18	1000000000000	'chr3R:25703649:25705532:+@chr3R:25722420:25722927:+.A.withRI','chr3R:25703649:25705532:+@chr3R:25722420:25722927:+.B.up_chr3R:25703649:25705532:+@chr3R:25722420:25722927:+.B.dn'	(0,0):55,(0,1):2,(1,0):833,(1,1):505	0:963,1:377	(0,0):76,(1,0):2251,(1,1):744	0:2560,1:435	chr3R	+	2570364925703640	2572292725722920
chr2R:17145469:17145516:+@chr2R:17151570:17152038:+	ri	0.02	0.01	0.05	0.2	0.13	0.29	-0.18	1.28851e+08	'chr2R:17145469:17145516:+@chr2R:17151570:17152038:+.A.withRI','chr2R:17145469:17145516:+@chr2R:17151570:17152038:+.B.up_chr2R:17145469:17145516:+@chr2R:17151570:17152038:+.B.dn'	(0,0):8,(1,0):10,(1,1):26	0:10,1:26	(0,0):26,(1,0):114,(1,1):33	0:118,1:29	chr2R	+	1714546917145460	1715203817152030
chr3R:19554103:19554262:+@chr3R:19554389:19554881:+	ri	0.21	0.16	0.27	0.39	0.32	0.46	-0.18	773.89	'chr3R:19554103:19554262:+@chr3R:19554389:19554881:+.A.withRI','chr3R:19554103:19554262:+@chr3R:19554389:19554881:+.B.up_chr3R:19554103:19554262:+@chr3R:19554389:19554881:+.B.dn'	(0,0):93,(0,1):69,(1,0):55,(1,1):318	0:111,1:331	(0,0):84,(0,1):51,(1,0):90,(1,1):329	0:219,1:251	chr3R	+	1955410319554100	1955488119554880
chr3L:3127653:3127699:-@chr3L:3126867:3127025:-	ri	0.19	0.14	0.25	0.37	0.29	0.45	-0.18	53.49	'chr3L:3127653:3127699:-@chr3L:3126867:3127025:-.A.withRI','chr3L:3127653:3127699:-@chr3L:3126867:3127025:-.B.dn_chr3L:3127653:3127699:-@chr3L:3126867:3127025:-.B.up'	(0,0):98,(0,1):37,(1,0):145,(1,1):6	0:145,1:43	(0,0):158,(0,1):38,(1,0):369,(1,1):10	0:373,1:44	chr3L	-	31268673126867	31276993127699
chr2R:17073474:17074552:+@chr2R:17074617:17075437:+	ri	0.13	0.06	0.21	0.31	0.22	0.42	-0.18	16.25	'chr2R:17073474:17074552:+@chr2R:17074617:17075437:+.A.withRI','chr2R:17073474:17074552:+@chr2R:17074617:17075437:+.B.up_chr2R:17073474:17074552:+@chr2R:17074617:17075437:+.B.dn'	(0,0):168,(0,1):2,(1,0):10,(1,1):1481	0:239,1:1254	(0,0):218,(0,1):2,(1,0):31,(1,1):1693	0:701,1:1025	chr2R	+	1707347417073470	1707543717075430
chr3R:1584484:1584572:-@chr3R:1583871:1584211:-	ri	0.08	0.03	0.15	0.26	0.16	0.37	-0.18	15.9	'chr3R:1584484:1584572:-@chr3R:1583871:1584211:-.A.withRI','chr3R:1584484:1584572:-@chr3R:1583871:1584211:-.B.dn_chr3R:1584484:1584572:-@chr3R:1583871:1584211:-.B.up'	(0,0):24,(0,1):21,(1,0):5,(1,1):26	0:5,1:47	(0,0):28,(0,1):22,(1,0):21,(1,1):20	0:28,1:35	chr3R	-	15838711583871	15845721584572
chr2L:107761:108346:+@chr2L:108588:108809:+	ri	0.09	0.04	0.16	0.27	0.18	0.38	-0.18	15.49	'chr2L:107761:108346:+@chr2L:108588:108809:+.A.withRI','chr2L:107761:108346:+@chr2L:108588:108809:+.B.up_chr2L:107761:108346:+@chr2L:108588:108809:+.B.dn'	(0,0):111,(0,1):31,(1,0):5,(1,1):59	0:8,1:87	(0,0):111,(0,1):31,(1,0):25,(1,1):90	0:49,1:97	chr2L	+	107761107761	108809108809
chr2R:5018988:5019477:-@chr2R:5018669:5018863:-	ri	0.08	0.02	0.17	0.26	0.17	0.37	-0.18	6.09	'chr2R:5018988:5019477:-@chr2R:5018669:5018863:-.A.withRI','chr2R:5018988:5019477:-@chr2R:5018669:5018863:-.B.dn_chr2R:5018988:5019477:-@chr2R:5018669:5018863:-.B.up'	(0,0):14,(0,1):14,(1,0):3,(1,1):68	0:5,1:80	(0,0):21,(0,1):27,(1,0):23,(1,1):121	0:50,1:121	chr2R	-	50186695018669	50194775019477
chr2R:18479829:18480533:-@chr2R:18453200:18454194:-	ri	0.6	0.55	0.64	0.77	0.73	0.81	-0.17	1000000000000	'chr2R:18479829:18480533:-@chr2R:18453200:18454194:-.A.withRI','chr2R:18479829:18480533:-@chr2R:18453200:18454194:-.B.dn_chr2R:18479829:18480533:-@chr2R:18453200:18454194:-.B.up'	(0,0):82,(0,1):49,(1,0):6947,(1,1):556	0:7296,1:256	(0,0):95,(0,1):48,(1,0):8754,(1,1):437	0:9079,1:160	chr2R	-	1845320018453200	1848053318480530
chr2RHet:1291242:1293174:-@chr2RHet:1265611:1265686:-	ri	0.38	0.34	0.43	0.55	0.49	0.61	-0.17	460176	'chr2RHet:1291242:1293174:-@chr2RHet:1265611:1265686:-.A.withRI','chr2RHet:1291242:1293174:-@chr2RHet:1265611:1265686:-.B.dn_chr2RHet:1291242:1293174:-@chr2RHet:1265611:1265686:-.B.up'	(0,0):116,(1,0):1779,(1,1):333	0:1898,1:214	(0,0):122,(1,0):3102,(1,1):405	0:3314,1:193	chr2RHet	-	12656111265611	12931741293174
chr3R:24496658:24496958:+@chr3R:24497009:24497737:+	ri	0.31	0.26	0.37	0.48	0.43	0.53	-0.17	71245.3	'chr3R:24496658:24496958:+@chr3R:24497009:24497737:+.A.withRI','chr3R:24496658:24496958:+@chr3R:24497009:24497737:+.B.up_chr3R:24496658:24496958:+@chr3R:24497009:24497737:+.B.dn'	(0,0):99,(0,1):111,(1,0):82,(1,1):847	0:361,1:679	(0,0):250,(0,1):164,(1,0):251,(1,1):1771	0:1147,1:1039	chr3R	+	2449665824496650	2449773724497730
chr3R:15052203:15052456:-@chr3R:15051737:15051792:-	ri	0.08	0.04	0.13	0.25	0.18	0.34	-0.17	125.41	'chr3R:15052203:15052456:-@chr3R:15051737:15051792:-.A.withRI','chr3R:15052203:15052456:-@chr3R:15051737:15051792:-.B.dn_chr3R:15052203:15052456:-@chr3R:15051737:15051792:-.B.up'	(0,0):17,(0,1):33,(1,0):12,(1,1):2	0:13,1:34	(0,0):35,(0,1):26,(1,0):51,(1,1):16	0:55,1:38	chr3R	-	1505173715051730	1505245615052450
chr2L:5336064:5336222:-@chr2L:5331722:5332850:-	ri	0.11	0.08	0.15	0.28	0.21	0.35	-0.17	46.53	'chr2L:5336064:5336222:-@chr2L:5331722:5332850:-.A.withRI','chr2L:5336064:5336222:-@chr2L:5331722:5332850:-.B.dn_chr2L:5336064:5336222:-@chr2L:5331722:5332850:-.B.up'	(0,0):23,(0,1):1,(1,0):41,(1,1):129	0:54,1:117	(0,0):26,(0,1):2,(1,0):115,(1,1):142	0:142,1:117	chr2L	-	53317225331722	53362225336222
chr2L:17410576:17411618:+@chr2L:17412795:17413503:+	ri	0.34	0.26	0.41	0.51	0.44	0.58	-0.17	40.91	'chr2L:17410576:17411618:+@chr2L:17412795:17413503:+.A.withRI','chr2L:17410576:17411618:+@chr2L:17412795:17413503:+.B.up_chr2L:17410576:17411618:+@chr2L:17412795:17413503:+.B.dn'	(0,0):40,(0,1):30,(1,0):83,(1,1):221	0:146,1:188	(0,0):49,(0,1):53,(1,0):202,(1,1):276	0:346,1:185	chr2L	+	1741057617410570	1741350317413500
chrX:11699574:11699660:-@chrX:11698930:11699075:-	ri	0.12	0.09	0.17	0.29	0.21	0.39	-0.17	38.56	'chrX:11699574:11699660:-@chrX:11698930:11699075:-.A.withRI','chrX:11699574:11699660:-@chrX:11698930:11699075:-.B.dn_chrX:11699574:11699660:-@chrX:11698930:11699075:-.B.up'	(0,0):551,(0,1):1,(1,0):63,(1,1):64	0:70,1:58	(0,0):635,(0,1):1,(1,0):116,(1,1):50	0:129,1:38	chrX	-	1169893011698930	1169966011699660
chrX:11699336:11699420:-@chrX:11698930:11699075:-	ri	0.12	0.08	0.18	0.29	0.21	0.39	-0.17	30.46	'chrX:11699336:11699420:-@chrX:11698930:11699075:-.A.withRI','chrX:11699336:11699420:-@chrX:11698930:11699075:-.B.dn_chrX:11699336:11699420:-@chrX:11698930:11699075:-.B.up'	(0,0):546,(0,1):4,(1,0):34,(1,1):64	0:44,1:58	(0,0):628,(0,1):9,(1,0):77,(1,1):50	0:94,1:42	chrX	-	1169893011698930	1169942011699420
chr2R:3096485:3097073:+@chr2R:3106560:3106673:+	ri	0.8	0.67	0.91	0.97	0.92	0.99	-0.17	11.44	'chr2R:3096485:3097073:+@chr2R:3106560:3106673:+.A.withRI','chr2R:3096485:3097073:+@chr2R:3106560:3106673:+.B.up_chr2R:3096485:3097073:+@chr2R:3106560:3106673:+.B.dn'	(0,0):7,(0,1):5,(1,0):556,(1,1):10	0:564,1:7	(0,0):30,(0,1):2,(1,0):1809,(1,1):11	0:1820,1:2	chr2R	+	30964853096485	31066733106673
chrX:4960106:4961280:+@chrX:4962169:4962831:+	ri	0.05	0.01	0.12	0.22	0.12	0.35	-0.17	4.2	'chrX:4960106:4961280:+@chrX:4962169:4962831:+.A.withRI','chrX:4960106:4961280:+@chrX:4962169:4962831:+.B.up_chrX:4960106:4961280:+@chrX:4962169:4962831:+.B.dn'	(0,0):14,(0,1):14,(1,0):3,(1,1):102	0:5,1:114	(0,0):8,(0,1):6,(1,0):11,(1,1):81	0:38,1:60	chrX	+	49601064960106	49628314962831
chrX:10262023:10262792:+@chrX:10275692:10276142:+	ri	0.09	0.08	0.1	0.25	0.22	0.29	-0.16	1000000000000	'chrX:10262023:10262792:+@chrX:10275692:10276142:+.A.withRI','chrX:10262023:10262792:+@chrX:10275692:10276142:+.B.up_chrX:10262023:10262792:+@chrX:10275692:10276142:+.B.dn'	(0,0):21,(0,1):51,(1,0):344,(1,1):253	0:373,1:275	(0,0):16,(0,1):35,(1,0):691,(1,1):170	0:731,1:165	chrX	+	1026202310262020	1027614210276140
chr2R:20413238:20413525:-@chr2R:20412297:20413174:-	ri	0.09	0.05	0.14	0.25	0.17	0.32	-0.16	10.49	'chr2R:20413238:20413525:-@chr2R:20412297:20413174:-.A.withRI','chr2R:20413238:20413525:-@chr2R:20412297:20413174:-.B.dn_chr2R:20413238:20413525:-@chr2R:20412297:20413174:-.B.up'	(0,0):50,(0,1):35,(1,0):8,(1,1):459	0:40,1:462	(0,0):90,(0,1):47,(1,0):30,(1,1):451	0:152,1:376	chr2R	-	2041229720412290	2041352520413520
chr2R:8757760:8757834:+@chr2R:8757908:8759608:+	ri	0.19	0.15	0.24	0.34	0.28	0.4	-0.15	50.1	'chr2R:8757760:8757834:+@chr2R:8757908:8759608:+.A.withRI','chr2R:8757760:8757834:+@chr2R:8757908:8759608:+.B.up_chr2R:8757760:8757834:+@chr2R:8757908:8759608:+.B.dn'	(0,0):298,(0,1):7,(1,0):57,(1,1):4008	0:907,1:3165	(0,0):369,(0,1):6,(1,0):116,(1,1):4800	0:1820,1:3102	chr2R	+	87577608757760	87596088759608
chr3L:3198993:3199078:-@chr3L:3198752:3198866:-	ri	0.34	0.27	0.42	0.49	0.41	0.57	-0.15	3.7	'chr3L:3198993:3199078:-@chr3L:3198752:3198866:-.A.withRI','chr3L:3198993:3199078:-@chr3L:3198752:3198866:-.B.dn_chr3L:3198993:3199078:-@chr3L:3198752:3198866:-.B.up'	(0,0):353,(0,1):51,(1,0):92,(1,1):8	0:95,1:56	(0,0):418,(0,1):42,(1,0):156,(1,1):16	0:161,1:53	chr3L	-	31987523198752	31990783199078
chr2R:15333723:15333794:-@chr2R:15333433:15333644:-	ri	0.15	0.08	0.22	0.3	0.21	0.4	-0.15	3.6	'chr2R:15333723:15333794:-@chr2R:15333433:15333644:-.A.withRI','chr2R:15333723:15333794:-@chr2R:15333433:15333644:-.B.dn_chr2R:15333723:15333794:-@chr2R:15333433:15333644:-.B.up'	(0,0):22,(0,1):32,(1,0):14,(1,1):46	0:19,1:73	(0,0):19,(0,1):27,(1,0):31,(1,1):50	0:43,1:65	chr2R	-	1533343315333430	1533379415333790
chr2R:3850957:3852831:+@chr2R:3856756:3856981:+	ri	0.79	0.71	0.88	0.94	0.86	0.99	-0.15	3	'chr2R:3850957:3852831:+@chr2R:3856756:3856981:+.A.withRI','chr2R:3850957:3852831:+@chr2R:3856756:3856981:+.B.up_chr2R:3850957:3852831:+@chr2R:3856756:3856981:+.B.dn'	(0,0):116,(0,1):3,(1,0):664,(1,1):386	0:988,1:65	(0,0):212,(1,0):824,(1,1):396	0:1206,1:14	chr2R	+	38509573850957	38569813856981
chr3R:4608008:4608106:-@chr3R:4601040:4603663:-	ri	0.22	0.2	0.24	0.36	0.34	0.39	-0.14	1000000000000	'chr3R:4608008:4608106:-@chr3R:4601040:4603663:-.A.withRI','chr3R:4608008:4608106:-@chr3R:4601040:4603663:-.B.dn_chr3R:4608008:4608106:-@chr3R:4601040:4603663:-.B.up'	(0,0):79,(0,1):70,(1,0):517,(1,1):1250	0:785,1:1052	(0,0):141,(0,1):63,(1,0):1077,(1,1):1580	0:1659,1:1061	chr3R	-	46010404601040	46081064608106
chrX:17751197:17751391:+@chrX:17751506:17751683:+	ri	0.14	0.1	0.18	0.28	0.23	0.33	-0.14	6846.12	'chrX:17751197:17751391:+@chrX:17751506:17751683:+.A.withRI','chrX:17751197:17751391:+@chrX:17751506:17751683:+.B.up_chrX:17751197:17751391:+@chrX:17751506:17751683:+.B.dn'	(0,0):157,(0,1):42,(1,0):45,(1,1):171	0:63,1:195	(0,0):210,(0,1):48,(1,0):122,(1,1):181	0:129,1:222	chrX	+	1775119717751190	1775168317751680
chr3R:10494588:10494717:-@chr3R:10490677:10493377:-	ri	0.33	0.3	0.37	0.47	0.43	0.52	-0.14	2571.66	'chr3R:10494588:10494717:-@chr3R:10490677:10493377:-.A.withRI','chr3R:10494588:10494717:-@chr3R:10490677:10493377:-.B.dn_chr3R:10494588:10494717:-@chr3R:10490677:10493377:-.B.up'	(0,0):66,(0,1):66,(1,0):282,(1,1):1526	0:811,1:1063	(0,0):83,(0,1):70,(1,0):495,(1,1):1854	0:1320,1:1099	chr3R	-	1049067710490670	1049471710494710
chr2L:5335664:5335764:-@chr2L:5331722:5332850:-	ri	0.08	0.05	0.12	0.22	0.17	0.29	-0.14	193.42	'chr2L:5335664:5335764:-@chr2L:5331722:5332850:-.A.withRI','chr2L:5335664:5335764:-@chr2L:5331722:5332850:-.B.dn_chr2L:5335664:5335764:-@chr2L:5331722:5332850:-.B.up'	(0,0):22,(1,0):27,(1,1):129	0:34,1:122	(0,0):26,(1,0):84,(1,1):142	0:116,1:110	chr2L	-	53317225331722	53357645335764
chr3R:25703649:25705532:+@chr3R:25723022:25723367:+	ri	0.15	0.14	0.17	0.28	0.26	0.3	-0.13	1000000000000	'chr3R:25703649:25705532:+@chr3R:25723022:25723367:+.A.withRI','chr3R:25703649:25705532:+@chr3R:25723022:25723367:+.B.up_chr3R:25703649:25705532:+@chr3R:25723022:25723367:+.B.dn'	(0,0):60,(0,1):52,(1,0):860,(1,1):580	0:944,1:548	(0,0):102,(0,1):65,(1,0):2271,(1,1):854	0:2520,1:670	chr3R	+	2570364925703640	2572336725723360
chr2L:5335717:5335764:-@chr2L:5331722:5332850:-	ri	0.07	0.05	0.11	0.2	0.15	0.26	-0.13	3952.84	'chr2L:5335717:5335764:-@chr2L:5331722:5332850:-.A.withRI','chr2L:5335717:5335764:-@chr2L:5331722:5332850:-.B.dn_chr2L:5335717:5335764:-@chr2L:5331722:5332850:-.B.up'	(0,0):20,(0,1):2,(1,0):27,(1,1):129	0:38,1:120	(0,0):24,(0,1):2,(1,0):84,(1,1):142	0:117,1:111	chr2L	-	53317225331722	53357645335764
chr2R:14028820:14028921:+@chr2R:14028997:14029177:+	ri	0.12	0.09	0.15	0.25	0.2	0.3	-0.13	1155.33	'chr2R:14028820:14028921:+@chr2R:14028997:14029177:+.A.withRI','chr2R:14028820:14028921:+@chr2R:14028997:14029177:+.B.up_chr2R:14028820:14028921:+@chr2R:14028997:14029177:+.B.dn'	(0,0):1345,(0,1):21,(1,0):44,(1,1):409	0:86,1:388	(0,0):1457,(0,1):16,(1,0):108,(1,1):481	0:222,1:383	chr2R	+	1402882014028820	1402917714029170
chr4:226367:226552:-@chr4:225266:225418:-	ri	0.12	0.08	0.15	0.25	0.18	0.32	-0.13	97.91	'chr4:226367:226552:-@chr4:225266:225418:-.A.withRI','chr4:226367:226552:-@chr4:225266:225418:-.B.dn_chr4:226367:226552:-@chr4:225266:225418:-.B.up'	(0,0):46,(0,1):54,(1,0):63,(1,1):12	0:64,1:65	(0,0):48,(0,1):35,(1,0):100,(1,1):9	0:101,1:43	chr4	-	225266225266	226552226552
chrX:6981647:6981692:-@chrX:6979652:6980011:-	ri	0.13	0.1	0.17	0.26	0.19	0.35	-0.13	33.31	'chrX:6981647:6981692:-@chrX:6979652:6980011:-.A.withRI','chrX:6981647:6981692:-@chrX:6979652:6980011:-.B.dn_chrX:6981647:6981692:-@chrX:6979652:6980011:-.B.up'	(0,0):60,(0,1):10,(1,0):105,(1,1):92	0:116,1:91	(0,0):47,(0,1):2,(1,0):117,(1,1):58	0:135,1:42	chrX	-	69796526979652	69816926981692
chrX:17751197:17751391:+@chrX:17751525:17751683:+	ri	0.2	0.15	0.25	0.33	0.28	0.38	-0.13	32.06	'chrX:17751197:17751391:+@chrX:17751525:17751683:+.A.withRI','chrX:17751197:17751391:+@chrX:17751525:17751683:+.B.up_chrX:17751197:17751391:+@chrX:17751525:17751683:+.B.dn'	(0,0):183,(0,1):16,(1,0):64,(1,1):152	0:70,1:162	(0,0):236,(0,1):22,(1,0):143,(1,1):160	0:153,1:172	chrX	+	1775119717751190	1775168317751680
chrX:17751197:17751391:+@chrX:17751521:17751683:+	ri	0.22	0.17	0.28	0.35	0.3	0.41	-0.13	20.12	'chrX:17751197:17751391:+@chrX:17751521:17751683:+.A.withRI','chrX:17751197:17751391:+@chrX:17751521:17751683:+.B.up_chrX:17751197:17751391:+@chrX:17751521:17751683:+.B.dn'	(0,0):197,(0,1):2,(1,0):63,(1,1):153	0:78,1:140	(0,0):254,(0,1):4,(1,0):138,(1,1):165	0:155,1:152	chrX	+	1775119717751190	1775168317751680
chr3R:11683052:11683218:-@chr3R:11682360:11682675:-	ri	0.07	0.02	0.13	0.2	0.14	0.28	-0.13	4.21	'chr3R:11683052:11683218:-@chr3R:11682360:11682675:-.A.withRI','chr3R:11683052:11683218:-@chr3R:11682360:11682675:-.B.dn_chr3R:11683052:11683218:-@chr3R:11682360:11682675:-.B.up'	(0,0):9,(0,1):20,(1,0):4,(1,1):18	0:6,1:36	(0,0):14,(0,1):32,(1,0):28,(1,1):37	0:32,1:65	chr3R	-	1168236011682360	1168321811683210
chr3R:7949015:7949100:-@chr3R:7948678:7948761:-	ri	0.11	0.06	0.17	0.24	0.16	0.33	-0.13	3.81	'chr3R:7949015:7949100:-@chr3R:7948678:7948761:-.A.withRI','chr3R:7949015:7949100:-@chr3R:7948678:7948761:-.B.dn_chr3R:7949015:7949100:-@chr3R:7948678:7948761:-.B.up'	(0,0):92,(0,1):27,(1,0):26	0:26,1:27	(0,0):129,(0,1):21,(1,0):55	0:55,1:21	chr3R	-	79486787948678	79491007949100
chr3R:25703649:25705532:+@chr3R:25727906:25728714:+	ri	0.17	0.16	0.19	0.29	0.27	0.31	-0.12	1000000000000	'chr3R:25703649:25705532:+@chr3R:25727906:25728714:+.A.withRI','chr3R:25703649:25705532:+@chr3R:25727906:25728714:+.B.up_chr3R:25703649:25705532:+@chr3R:25727906:25728714:+.B.dn'	(0,0):156,(1,0):1011,(1,1):659	0:1117,1:553	(0,0):232,(0,1):1,(1,0):2452,(1,1):943	0:2715,1:681	chr3R	+	2570364925703640	2572871425728710
chr2L:8042469:8042613:-@chr2L:8041771:8042125:-	ri	0.24	0.23	0.25	0.36	0.34	0.37	-0.12	1000000000000	'chr2L:8042469:8042613:-@chr2L:8041771:8042125:-.A.withRI','chr2L:8042469:8042613:-@chr2L:8041771:8042125:-.B.dn_chr2L:8042469:8042613:-@chr2L:8041771:8042125:-.B.up'	(0,0):5272,(0,1):1515,(1,0):1344,(1,1):1194	0:1607,1:2446	(0,0):5641,(0,1):1342,(1,0):2087,(1,1):1232	0:2558,1:2103	chr2L	-	80417718041771	80426138042613
chr3L:23709002:23709420:+@chr3L:23709473:23709789:+	ri	0.04	0.02	0.08	0.16	0.11	0.22	-0.12	51.9	'chr3L:23709002:23709420:+@chr3L:23709473:23709789:+.A.withRI','chr3L:23709002:23709420:+@chr3L:23709473:23709789:+.B.up_chr3L:23709002:23709420:+@chr3L:23709473:23709789:+.B.dn'	(0,0):38,(0,1):84,(1,0):7,(1,1):509	0:28,1:572	(0,0):44,(0,1):78,(1,0):28,(1,1):540	0:104,1:542	chr3L	+	2370900223709000	2370978923709780
chr2R:19838029:19838092:+@chr2R:19839676:19839984:+	ri	0.16	0.12	0.21	0.28	0.23	0.34	-0.12	21.61	'chr2R:19838029:19838092:+@chr2R:19839676:19839984:+.A.withRI','chr2R:19838029:19838092:+@chr2R:19839676:19839984:+.B.up_chr2R:19838029:19838092:+@chr2R:19839676:19839984:+.B.dn'	(0,0):23,(0,1):16,(1,0):111,(1,1):59	0:122,1:64	(0,0):18,(0,1):25,(1,0):333,(1,1):95	0:363,1:90	chr2R	+	1983802919838020	1983998419839980
chr2R:20402671:20402736:-@chr2R:20402059:20402393:-	ri	0.1	0.06	0.16	0.22	0.17	0.29	-0.12	9.85	'chr2R:20402671:20402736:-@chr2R:20402059:20402393:-.A.withRI','chr2R:20402671:20402736:-@chr2R:20402059:20402393:-.B.dn_chr2R:20402671:20402736:-@chr2R:20402059:20402393:-.B.up'	(0,0):52,(0,1):2,(1,0):19,(1,1):138	0:24,1:135	(0,0):59,(0,1):2,(1,0):62,(1,1):205	0:99,1:170	chr2R	-	2040205920402050	2040273620402730
chr2R:3716072:3716181:-@chr2R:3715915:3716014:-	ri	0.08	0.04	0.13	0.2	0.14	0.28	-0.12	5.95	'chr2R:3716072:3716181:-@chr2R:3715915:3716014:-.A.withRI','chr2R:3716072:3716181:-@chr2R:3715915:3716014:-.B.dn_chr2R:3716072:3716181:-@chr2R:3715915:3716014:-.B.up'	(0,0):81,(0,1):42,(1,0):8,(1,1):72	0:12,1:110	(0,0):85,(0,1):50,(1,0):28,(1,1):81	0:46,1:113	chr2R	-	37159153715915	37161813716181
chr3R:17999969:18000449:+@chr3R:18104074:18104348:+	ri	0.21	0.17	0.26	0.33	0.27	0.39	-0.12	5.85	'chr3R:17999969:18000449:+@chr3R:18104074:18104348:+.A.withRI','chr3R:17999969:18000449:+@chr3R:18104074:18104348:+.B.up_chr3R:17999969:18000449:+@chr3R:18104074:18104348:+.B.dn'	(0,0):177,(0,1):7,(1,0):3239,(1,1):77	0:3262,1:61	(0,0):302,(0,1):5,(1,0):5879,(1,1):92	0:5903,1:73	chr3R	+	1799996917999960	1810434818104340
chrX:16615240:16615440:-@chrX:16614745:16614807:-	ri	0.05	0.02	0.1	0.17	0.1	0.29	-0.12	4.31	'chrX:16615240:16615440:-@chrX:16614745:16614807:-.A.withRI','chrX:16615240:16615440:-@chrX:16614745:16614807:-.B.dn_chrX:16615240:16615440:-@chrX:16614745:16614807:-.B.up'	(0,0):4,(0,1):4,(1,0):5,(1,1):19	0:7,1:21	(0,0):10,(0,1):2,(1,0):22,(1,1):24	0:23,1:25	chrX	-	1661474516614740	1661544016615440
chr3L:14062186:14062496:+@chr3L:14063022:14063722:+	ri	0.08	0.04	0.14	0.2	0.14	0.29	-0.12	3.64	'chr3L:14062186:14062496:+@chr3L:14063022:14063722:+.A.withRI','chr3L:14062186:14062496:+@chr3L:14063022:14063722:+.B.up_chr3L:14062186:14062496:+@chr3L:14063022:14063722:+.B.dn'	(0,0):35,(0,1):1,(1,0):9,(1,1):194	0:21,1:183	(0,0):40,(1,0):29,(1,1):235	0:59,1:205	chr3L	+	1406218614062180	1406372214063720
chr2L:2564171:2564522:-@chr2L:2563700:2564119:-	ri	0.04	0.01	0.09	0.16	0.09	0.25	-0.12	3.08	'chr2L:2564171:2564522:-@chr2L:2563700:2564119:-.A.withRI','chr2L:2564171:2564522:-@chr2L:2563700:2564119:-.B.dn_chr2L:2564171:2564522:-@chr2L:2563700:2564119:-.B.up'	(0,0):89,(0,1):37,(1,0):3,(1,1):300	0:8,1:332	(0,0):72,(0,1):35,(1,0):11,(1,1):233	0:50,1:229	chr2L	-	25637002563700	25645222564522
chr3R:19655900:19656051:+@chr3R:19671073:19671184:+	ri	0.07	0.05	0.08	0.18	0.15	0.23	-0.11	1000000000000	'chr3R:19655900:19656051:+@chr3R:19671073:19671184:+.A.withRI','chr3R:19655900:19656051:+@chr3R:19671073:19671184:+.B.up_chr3R:19655900:19656051:+@chr3R:19671073:19671184:+.B.dn'	(0,0):33,(0,1):55,(1,0):784,(1,1):3	0:784,1:58	(0,0):53,(0,1):52,(1,0):2185	0:2185,1:52	chr3R	+	1965590019655900	1967118419671180
chrX:6673444:6673885:-@chrX:6668594:6668995:-	ri	0.12	0.09	0.15	0.23	0.17	0.31	-0.11	13.01	'chrX:6673444:6673885:-@chrX:6668594:6668995:-.A.withRI','chrX:6673444:6673885:-@chrX:6668594:6668995:-.B.dn_chrX:6673444:6673885:-@chrX:6668594:6668995:-.B.up'	(0,0):28,(0,1):27,(1,0):85,(1,1):73	0:91,1:94	(0,0):21,(0,1):12,(1,0):96,(1,1):44	0:103,1:49	chrX	-	66685946668594	66738856673885
chr3R:23463795:23464027:+@chr3R:23464101:23464261:+	ri	0.04	0.01	0.09	0.15	0.11	0.21	-0.11	9.09	'chr3R:23463795:23464027:+@chr3R:23464101:23464261:+.A.withRI','chr3R:23463795:23464027:+@chr3R:23464101:23464261:+.B.up_chr3R:23463795:23464027:+@chr3R:23464101:23464261:+.B.dn'	(0,0):37,(0,1):30,(1,0):3,(1,1):66	0:5,1:94	(0,0):48,(0,1):61,(1,0):31,(1,1):130	0:46,1:176	chr3R	+	2346379523463790	2346426123464260
chr2R:8841316:8841382:+@chr2R:8841463:8841806:+	ri	0.02	0	0.05	0.13	0.05	0.24	-0.11	3.61	'chr2R:8841316:8841382:+@chr2R:8841463:8841806:+.A.withRI','chr2R:8841316:8841382:+@chr2R:8841463:8841806:+.B.up_chr2R:8841316:8841382:+@chr2R:8841463:8841806:+.B.dn'	(0,0):112,(1,1):146	0:1,1:145	(0,0):143,(1,0):6,(1,1):151	0:17,1:140	chr2R	+	88413168841316	88418068841806
chr2R:9336502:9336659:-@chr2R:9334637:9334833:-	ri	0.13	0.1	0.18	0.24	0.18	0.3	-0.11	3.15	'chr2R:9336502:9336659:-@chr2R:9334637:9334833:-.A.withRI','chr2R:9336502:9336659:-@chr2R:9334637:9334833:-.B.dn_chr2R:9336502:9336659:-@chr2R:9334637:9334833:-.B.up'	(0,0):22,(0,1):31,(1,0):82,(1,1):20	0:85,1:48	(0,0):37,(0,1):34,(1,0):146,(1,1):13	0:151,1:42	chr2R	-	93346379334637	93366599336659
chr3R:9807356:9809083:-@chr3R:9796674:9796824:-	ri	0.18	0.16	0.2	0.28	0.25	0.31	-0.1	2.93056e+06	'chr3R:9807356:9809083:-@chr3R:9796674:9796824:-.A.withRI','chr3R:9807356:9809083:-@chr3R:9796674:9796824:-.B.dn_chr3R:9807356:9809083:-@chr3R:9796674:9796824:-.B.up'	(0,0):102,(0,1):39,(1,0):834,(1,1):679	0:934,1:618	(0,0):80,(0,1):24,(1,0):716,(1,1):376	0:816,1:300	chr3R	-	97966749796674	98090839809083
chr3R:7272841:7274081:-@chr3R:7266845:7266968:-	ri	0.16	0.13	0.19	0.26	0.22	0.31	-0.1	225.04	'chr3R:7272841:7274081:-@chr3R:7266845:7266968:-.A.withRI','chr3R:7272841:7274081:-@chr3R:7266845:7266968:-.B.dn_chr3R:7272841:7274081:-@chr3R:7266845:7266968:-.B.up'	(0,0):30,(0,1):8,(1,0):206,(1,1):252	0:234,1:232	(0,0):54,(0,1):12,(1,0):271,(1,1):190	0:315,1:158	chr3R	-	72668457266845	72740817274081
chr3R:2905686:2906192:-@chr3R:2904976:2905177:-	ri	0.17	0.14	0.2	0.27	0.23	0.31	-0.1	36.25	'chr3R:2905686:2906192:-@chr3R:2904976:2905177:-.A.withRI','chr3R:2905686:2906192:-@chr3R:2904976:2905177:-.B.dn_chr3R:2905686:2906192:-@chr3R:2904976:2905177:-.B.up'	(0,0):57,(0,1):118,(1,0):107,(1,1):355	0:169,1:411	(0,0):76,(0,1):111,(1,0):190,(1,1):407	0:297,1:411	chr3R	-	29049762904976	29061922906192
chr2R:19738080:19738390:-@chr2R:19734610:19736322:-	ri	0.87	0.81	0.92	0.97	0.95	0.99	-0.1	33.67	'chr2R:19738080:19738390:-@chr2R:19734610:19736322:-.A.withRI','chr2R:19738080:19738390:-@chr2R:19734610:19736322:-.B.dn_chr2R:19738080:19738390:-@chr2R:19734610:19736322:-.B.up'	(0,0):35,(0,1):12,(1,0):439,(1,1):326	0:724,1:53	(0,0):46,(0,1):5,(1,0):676,(1,1):324	0:995,1:10	chr2R	-	1973461019734610	1973839019738390
chr2R:2108414:2108781:+@chr2R:2120771:2121812:+	ri	0.25	0.21	0.29	0.35	0.31	0.4	-0.1	24.21	'chr2R:2108414:2108781:+@chr2R:2120771:2121812:+.A.withRI','chr2R:2108414:2108781:+@chr2R:2120771:2121812:+.B.up_chr2R:2108414:2108781:+@chr2R:2120771:2121812:+.B.dn'	(0,0):27,(0,1):24,(1,0):616,(1,1):216	0:677,1:179	(0,0):19,(0,1):27,(1,0):863,(1,1):206	0:927,1:169	chr2R	+	21084142108414	21218122121812
chr2R:20402754:20402822:-@chr2R:20402059:20402393:-	ri	0.07	0.05	0.11	0.17	0.13	0.21	-0.1	13.27	'chr2R:20402754:20402822:-@chr2R:20402059:20402393:-.A.withRI','chr2R:20402754:20402822:-@chr2R:20402059:20402393:-.B.dn_chr2R:20402754:20402822:-@chr2R:20402059:20402393:-.B.up'	(0,0):26,(0,1):26,(1,0):23,(1,1):138	0:42,1:145	(0,0):34,(0,1):24,(1,0):70,(1,1):205	0:115,1:184	chr2R	-	2040205920402050	2040282220402820
chr3R:8508859:8508963:-@chr3R:8507928:8508264:-	ri	0.06	0.04	0.1	0.16	0.12	0.21	-0.1	9.09	'chr3R:8508859:8508963:-@chr3R:8507928:8508264:-.A.withRI','chr3R:8508859:8508963:-@chr3R:8507928:8508264:-.B.dn_chr3R:8508859:8508963:-@chr3R:8507928:8508264:-.B.up'	(0,0):23,(0,1):47,(1,0):20,(1,1):64	0:24,1:107	(0,0):35,(0,1):40,(1,0):64,(1,1):97	0:83,1:118	chr3R	-	85079288507928	85089638508963
chrX:11464900:11465141:+@chrX:11465202:11465510:+	ri	0.05	0.02	0.09	0.15	0.09	0.22	-0.1	7.29	'chrX:11464900:11465141:+@chrX:11465202:11465510:+.A.withRI','chrX:11464900:11465141:+@chrX:11465202:11465510:+.B.up_chrX:11464900:11465141:+@chrX:11465202:11465510:+.B.dn'	(0,0):75,(0,1):50,(1,0):4,(1,1):175	0:12,1:217	(0,0):80,(0,1):49,(1,0):21,(1,1):209	0:46,1:233	chrX	+	1146490011464900	1146551011465510
chr3R:19785178:19785315:+@chr3R:19787773:19788299:+	ri	0.25	0.2	0.3	0.35	0.3	0.41	-0.1	3.18	'chr3R:19785178:19785315:+@chr3R:19787773:19788299:+.A.withRI','chr3R:19785178:19785315:+@chr3R:19787773:19788299:+.B.up_chr3R:19785178:19785315:+@chr3R:19787773:19788299:+.B.dn'	(0,0):41,(0,1):34,(1,0):197,(1,1):100	0:224,1:107	(0,0):72,(0,1):36,(1,0):355,(1,1):127	0:395,1:123	chr3R	+	1978517819785170	1978829919788290
chr2L:5047273:5047479:+@chr2L:5047543:5048366:+	ri	0.09	0.06	0.11	0.18	0.15	0.21	-0.09	407519	'chr2L:5047273:5047479:+@chr2L:5047543:5048366:+.A.withRI','chr2L:5047273:5047479:+@chr2L:5047543:5048366:+.B.up_chr2L:5047273:5047479:+@chr2L:5047543:5048366:+.B.dn'	(0,0):90,(0,1):210,(1,0):42,(1,1):1672	0:181,1:1743	(0,0):145,(0,1):226,(1,0):106,(1,1):2134	0:447,1:2019	chr2L	+	50472735047273	50483665048366
chr2L:2870689:2870932:-@chr2L:2869323:2869550:-	ri	0.12	0.1	0.15	0.21	0.18	0.23	-0.09	505.41	'chr2L:2870689:2870932:-@chr2L:2869323:2869550:-.A.withRI','chr2L:2870689:2870932:-@chr2L:2869323:2869550:-.B.dn_chr2L:2870689:2870932:-@chr2L:2869323:2869550:-.B.up'	(0,0):28,(0,1):128,(1,0):149,(1,1):114	0:163,1:228	(0,0):59,(0,1):185,(1,0):405,(1,1):188	0:448,1:330	chr2L	-	28693232869323	28709322870932
chr2L:18387287:18387317:+@chr2L:18391052:18391364:+	ri	0.09	0.07	0.12	0.18	0.14	0.23	-0.09	44.68	'chr2L:18387287:18387317:+@chr2L:18391052:18391364:+.A.withRI','chr2L:18387287:18387317:+@chr2L:18391052:18391364:+.B.up_chr2L:18387287:18387317:+@chr2L:18391052:18391364:+.B.dn'	(0,0):40,(0,1):13,(1,0):187,(1,1):66	0:191,1:75	(0,0):49,(0,1):13,(1,0):341,(1,1):59	0:353,1:60	chr2L	+	1838728718387280	1839136418391360
chr2R:18817912:18818803:+@chr2R:18819038:18819238:+	ri	0.03	0.01	0.06	0.12	0.07	0.17	-0.09	13.06	'chr2R:18817912:18818803:+@chr2R:18819038:18819238:+.A.withRI','chr2R:18817912:18818803:+@chr2R:18819038:18819238:+.B.up_chr2R:18817912:18818803:+@chr2R:18819038:18819238:+.B.dn'	(0,0):148,(0,1):83,(1,0):7,(1,1):580	0:21,1:649	(0,0):162,(0,1):51,(1,0):22,(1,1):486	0:73,1:486	chr2R	+	1881791218817910	1881923818819230
chr2L:5337841:5338053:-@chr2L:5331722:5332850:-	ri	0.1	0.07	0.13	0.19	0.15	0.24	-0.09	12.46	'chr2L:5337841:5338053:-@chr2L:5331722:5332850:-.A.withRI','chr2L:5337841:5338053:-@chr2L:5331722:5332850:-.B.dn_chr2L:5337841:5338053:-@chr2L:5331722:5332850:-.B.up'	(0,0):17,(0,1):14,(1,0):61,(1,1):130	0:74,1:131	(0,0):27,(0,1):6,(1,0):123,(1,1):144	0:155,1:118	chr2L	-	53317225331722	53380535338053
chr2L:13027345:13027744:-@chr2L:13022941:13025497:-	ri	0.22	0.19	0.26	0.31	0.27	0.35	-0.09	10.17	'chr2L:13027345:13027744:-@chr2L:13022941:13025497:-.A.withRI','chr2L:13027345:13027744:-@chr2L:13022941:13025497:-.B.dn_chr2L:13027345:13027744:-@chr2L:13022941:13025497:-.B.up'	(0,0):150,(0,1):15,(1,0):230,(1,1):1489	0:577,1:1157	(0,0):116,(0,1):5,(1,0):259,(1,1):1234	0:618,1:880	chr2L	-	1302294113022940	1302774413027740
chr2R:125524:125714:-@chr2R:124419:125228:-	ri	0.03	0.01	0.06	0.12	0.07	0.17	-0.09	6.56	'chr2R:125524:125714:-@chr2R:124419:125228:-.A.withRI','chr2R:125524:125714:-@chr2R:124419:125228:-.B.dn_chr2R:125524:125714:-@chr2R:124419:125228:-.B.up'	(0,0):61,(0,1):58,(1,0):4,(1,1):210	0:8,1:264	(0,0):47,(0,1):62,(1,0):20,(1,1):237	0:40,1:279	chr2R	-	124419124419	125714125714
chr3L:12509659:12510159:+@chr3L:12510528:12511057:+	ri	0.06	0.03	0.1	0.15	0.11	0.21	-0.09	3.28	'chr3L:12509659:12510159:+@chr3L:12510528:12511057:+.A.withRI','chr3L:12509659:12510159:+@chr3L:12510528:12511057:+.B.up_chr3L:12509659:12510159:+@chr3L:12510528:12511057:+.B.dn'	(0,0):56,(0,1):44,(1,0):9,(1,1):239	0:30,1:262	(0,0):76,(0,1):45,(1,0):29,(1,1):270	0:84,1:260	chr3L	+	1250965912509650	1251105712511050
chr3L:13037476:13037665:+@chr3L:13038018:13038695:+	ri	0.14	0.1	0.19	0.23	0.19	0.27	-0.09	3.03	'chr3L:13037476:13037665:+@chr3L:13038018:13038695:+.A.withRI','chr3L:13037476:13037665:+@chr3L:13038018:13038695:+.B.up_chr3L:13037476:13037665:+@chr3L:13038018:13038695:+.B.dn'	(0,0):42,(0,1):61,(1,0):38,(1,1):327	0:85,1:341	(0,0):64,(0,1):113,(1,0):117,(1,1):559	0:251,1:538	chr3L	+	1303747613037470	1303869513038690
chr3R:2125681:2125886:+@chr3R:2125941:2126730:+	ri	0.06	0.04	0.08	0.14	0.11	0.16	-0.08	2.69653e+10	'chr3R:2125681:2125886:+@chr3R:2125941:2126730:+.A.withRI','chr3R:2125681:2125886:+@chr3R:2125941:2126730:+.B.up_chr3R:2125681:2125886:+@chr3R:2125941:2126730:+.B.dn'	(0,0):360,(0,1):405,(1,0):50,(1,1):2724	0:223,1:2956	(0,0):344,(0,1):336,(1,0):102,(1,1):2301	0:397,1:2342	chr3R	+	21256812125681	21267302126730
chr4:194737:194790:-@chr4:193458:194362:-	ri	0.11	0.08	0.13	0.19	0.15	0.23	-0.08	43.58	'chr4:194737:194790:-@chr4:193458:194362:-.A.withRI','chr4:194737:194790:-@chr4:193458:194362:-.B.dn_chr4:194737:194790:-@chr4:193458:194362:-.B.up'	(0,0):170,(0,1):89,(1,0):80,(1,1):1246	0:195,1:1220	(0,0):107,(0,1):53,(1,0):107,(1,1):979	0:280,1:859	chr4	-	193458193458	194790194790
chr3R:4645650:4646441:-@chr3R:4643363:4644985:-	ri	0.09	0.07	0.12	0.17	0.13	0.2	-0.08	7.85	'chr3R:4645650:4646441:-@chr3R:4643363:4644985:-.A.withRI','chr3R:4645650:4646441:-@chr3R:4643363:4644985:-.B.dn_chr3R:4645650:4646441:-@chr3R:4643363:4644985:-.B.up'	(0,0):150,(0,1):77,(1,0):49,(1,1):1402	0:179,1:1349	(0,0):153,(0,1):71,(1,0):83,(1,1):1308	0:299,1:1163	chr3R	-	46433634643363	46464414646441
chr2L:13027194:13027744:-@chr2L:13022941:13025497:-	ri	0.2	0.17	0.23	0.28	0.24	0.32	-0.08	7.68	'chr2L:13027194:13027744:-@chr2L:13022941:13025497:-.A.withRI','chr2L:13027194:13027744:-@chr2L:13022941:13025497:-.B.dn_chr2L:13027194:13027744:-@chr2L:13022941:13025497:-.B.up'	(0,0):157,(0,1):8,(1,0):182,(1,1):1537	0:443,1:1284	(0,0):119,(0,1):2,(1,0):210,(1,1):1283	0:546,1:949	chr2L	-	1302294113022940	1302774413027740
chr2L:8352201:8352371:+@chr2L:8353331:8353503:+	ri	0.02	0.01	0.04	0.1	0.05	0.16	-0.08	5.92	'chr2L:8352201:8352371:+@chr2L:8353331:8353503:+.A.withRI','chr2L:8352201:8352371:+@chr2L:8353331:8353503:+.B.up_chr2L:8352201:8352371:+@chr2L:8353331:8353503:+.B.dn'	(0,0):8,(0,1):30,(1,0):5,(1,1):7	0:5,1:37	(0,0):12,(0,1):18,(1,0):17,(1,1):6	0:17,1:24	chr2L	+	83522018352201	83535038353503
chr3R:25598998:25599543:+@chr3R:25617115:25617442:+	ri	0.2	0.17	0.23	0.28	0.24	0.32	-0.08	5.38	'chr3R:25598998:25599543:+@chr3R:25617115:25617442:+.A.withRI','chr3R:25598998:25599543:+@chr3R:25617115:25617442:+.B.up_chr3R:25598998:25599543:+@chr3R:25617115:25617442:+.B.dn'	(0,0):106,(0,1):32,(1,0):772,(1,1):108	0:802,1:110	(0,0):216,(0,1):36,(1,0):1528,(1,1):163	0:1565,1:162	chr3R	+	2559899825598990	2561744225617440
chr2L:6109573:6110224:+@chr2L:6121774:6121943:+	ri	0.18	0.16	0.22	0.26	0.22	0.3	-0.08	5.17	'chr2L:6109573:6110224:+@chr2L:6121774:6121943:+.A.withRI','chr2L:6109573:6110224:+@chr2L:6121774:6121943:+.B.up_chr2L:6109573:6110224:+@chr2L:6121774:6121943:+.B.dn'	(0,0):195,(0,1):4,(1,0):627,(1,1):180	0:663,1:148	(0,0):272,(0,1):3,(1,0):985,(1,1):203	0:1035,1:156	chr2L	+	61095736109573	61219436121943
chrX:157701:158061:-@chrX:152926:153704:-	ri	0.22	0.2	0.25	0.3	0.26	0.34	-0.08	5.02	'chrX:157701:158061:-@chrX:152926:153704:-.A.withRI','chrX:157701:158061:-@chrX:152926:153704:-.B.dn_chrX:157701:158061:-@chrX:152926:153704:-.B.up'	(0,0):64,(0,1):52,(1,0):461,(1,1):404	0:568,1:349	(0,0):55,(0,1):28,(1,0):441,(1,1):299	0:534,1:234	chrX	-	152926152926	158061158061
chr3R:24496451:24496505:+@chr3R:24496560:24496958:+	ri	0.05	0.02	0.09	0.13	0.1	0.18	-0.08	4.93	'chr3R:24496451:24496505:+@chr3R:24496560:24496958:+.A.withRI','chr3R:24496451:24496505:+@chr3R:24496560:24496958:+.B.up_chr3R:24496451:24496505:+@chr3R:24496560:24496958:+.B.dn'	(0,0):130,(0,1):57,(1,0):6,(1,1):280	0:22,1:321	(0,0):275,(0,1):101,(1,0):38,(1,1):575	0:108,1:606	chr3R	+	2449645124496450	2449695824496950
chr2L:13027371:13027744:-@chr2L:13022941:13025497:-	ri	0.24	0.21	0.27	0.32	0.28	0.36	-0.08	4.92	'chr2L:13027371:13027744:-@chr2L:13022941:13025497:-.A.withRI','chr2L:13027371:13027744:-@chr2L:13022941:13025497:-.B.dn_chr2L:13027371:13027744:-@chr2L:13022941:13025497:-.B.up'	(0,0):150,(0,1):15,(1,0):246,(1,1):1473	0:607,1:1127	(0,0):119,(0,1):2,(1,0):269,(1,1):1224	0:676,1:819	chr2L	-	1302294113022940	1302774413027740
chr3R:11104225:11104282:+@chr3R:11110335:11110484:+	ri	0.02	0.01	0.04	0.1	0.05	0.2	-0.08	4.05	'chr3R:11104225:11104282:+@chr3R:11110335:11110484:+.A.withRI','chr3R:11104225:11104282:+@chr3R:11110335:11110484:+.B.up_chr3R:11104225:11104282:+@chr3R:11110335:11110484:+.B.dn'	(0,0):264,(0,1):1,(1,0):48,(1,1):16	0:48,1:17	(0,0):332,(1,0):124,(1,1):11	0:125,1:10	chr3R	+	1110422511104220	1111048411110480
chr3R:17122345:17122866:+@chr3R:17123532:17124246:+	ri	0.75	0.72	0.78	0.83	0.79	0.86	-0.08	3.19	'chr3R:17122345:17122866:+@chr3R:17123532:17124246:+.A.withRI','chr3R:17122345:17122866:+@chr3R:17123532:17124246:+.B.up_chr3R:17122345:17122866:+@chr3R:17123532:17124246:+.B.dn'	(0,0):224,(0,1):32,(1,0):2223,(1,1):4283	0:5400,1:1138	(0,0):225,(0,1):29,(1,0):2410,(1,1):4138	0:5685,1:892	chr3R	+	1712234517122340	1712424617124240
chr3R:22912063:22912341:-@chr3R:22910021:22910223:-	ri	0.04	0.03	0.06	0.12	0.07	0.18	-0.08	3.05	'chr3R:22912063:22912341:-@chr3R:22910021:22910223:-.A.withRI','chr3R:22912063:22912341:-@chr3R:22910021:22910223:-.B.dn_chr3R:22912063:22912341:-@chr3R:22910021:22910223:-.B.up'	(0,0):64,(0,1):32,(1,0):31,(1,1):82	0:32,1:113	(0,0):14,(0,1):5,(1,0):25,(1,1):30	0:27,1:33	chr3R	-	2291002122910020	2291234122912340
chr3R:16628012:16628273:+@chr3R:16631672:16631963:+	ri	0.11	0.1	0.13	0.18	0.16	0.2	-0.07	4.93537e+08	'chr3R:16628012:16628273:+@chr3R:16631672:16631963:+.A.withRI','chr3R:16628012:16628273:+@chr3R:16631672:16631963:+.B.up_chr3R:16628012:16628273:+@chr3R:16631672:16631963:+.B.dn'	(0,0):256,(0,1):29,(1,0):468,(1,1):406	0:516,1:387	(0,0):286,(0,1):40,(1,0):789,(1,1):405	0:868,1:366	chr3R	+	1662801216628010	1663196316631960
chr3R:4647666:4647847:+@chr3R:4648191:4648388:+	ri	0.06	0.05	0.08	0.13	0.1	0.17	-0.07	238196	'chr3R:4647666:4647847:+@chr3R:4648191:4648388:+.A.withRI','chr3R:4647666:4647847:+@chr3R:4648191:4648388:+.B.up_chr3R:4647666:4647847:+@chr3R:4648191:4648388:+.B.dn'	(0,0):366,(0,1):303,(1,0):82,(1,1):217	0:94,1:508	(0,0):160,(0,1):121,(1,0):79,(1,1):113	0:98,1:215	chr3R	+	46476664647666	46483884648388
chr2L:5985026:5985220:+@chr2L:5985290:5985559:+	ri	0.4	0.38	0.42	0.47	0.45	0.49	-0.07	2351.59	'chr2L:5985026:5985220:+@chr2L:5985290:5985559:+.A.withRI','chr2L:5985026:5985220:+@chr2L:5985290:5985559:+.B.up_chr2L:5985026:5985220:+@chr2L:5985290:5985559:+.B.dn'	(0,0):2442,(0,1):159,(1,0):1061,(1,1):3155	0:1902,1:2473	(0,0):2669,(0,1):242,(1,0):1402,(1,1):3427	0:2723,1:2348	chr2L	+	59850265985026	59855595985559
chr3R:26214535:26214655:+@chr3R:26214921:26215050:+	ri	0.06	0.04	0.08	0.13	0.1	0.15	-0.07	158.23	'chr3R:26214535:26214655:+@chr3R:26214921:26215050:+.A.withRI','chr3R:26214535:26214655:+@chr3R:26214921:26215050:+.B.up_chr3R:26214535:26214655:+@chr3R:26214921:26215050:+.B.dn'	(0,0):272,(0,1):126,(1,0):42,(1,1):24	0:44,1:148	(0,0):345,(0,1):154,(1,0):118,(1,1):41	0:128,1:185	chr3R	+	2621453526214530	2621505026215050
chr2L:14349709:14349782:-@chr2L:14349041:14349639:-	ri	0.02	0.01	0.03	0.09	0.05	0.15	-0.07	68.7	'chr2L:14349709:14349782:-@chr2L:14349041:14349639:-.A.withRI','chr2L:14349709:14349782:-@chr2L:14349041:14349639:-.B.dn_chr2L:14349709:14349782:-@chr2L:14349041:14349639:-.B.up'	(0,0):258,(0,1):165,(1,0):5,(1,1):1082	0:25,1:1227	(0,0):91,(0,1):32,(1,0):9,(1,1):318	0:44,1:315	chr2L	-	1434904114349040	1434978214349780
chr2L:1163760:1164237:-@chr2L:1163000:1163149:-	ri	0.16	0.14	0.18	0.23	0.2	0.27	-0.07	52.71	'chr2L:1163760:1164237:-@chr2L:1163000:1163149:-.A.withRI','chr2L:1163760:1164237:-@chr2L:1163000:1163149:-.B.dn_chr2L:1163760:1164237:-@chr2L:1163000:1163149:-.B.up'	(0,0):230,(0,1):433,(1,0):205,(1,1):30	0:215,1:453	(0,0):182,(0,1):271,(1,0):200,(1,1):16	0:203,1:284	chr2L	-	11630001163000	11642371164237
chr3R:17122345:17122819:+@chr3R:17123532:17124246:+	ri	0.68	0.66	0.71	0.75	0.72	0.78	-0.07	6	'chr3R:17122345:17122819:+@chr3R:17123532:17124246:+.A.withRI','chr3R:17122345:17122819:+@chr3R:17123532:17124246:+.B.up_chr3R:17122345:17122819:+@chr3R:17123532:17124246:+.B.dn'	(0,0):164,(0,1):92,(1,0):2378,(1,1):4128	0:5353,1:1245	(0,0):171,(0,1):83,(1,0):2560,(1,1):3988	0:5514,1:1117	chr3R	+	1712234517122340	1712424617124240
chr2R:17073474:17074552:+@chr2R:17074608:17075437:+	ri	0.04	0.01	0.07	0.11	0.07	0.17	-0.07	4.35	'chr2R:17073474:17074552:+@chr2R:17074608:17075437:+.A.withRI','chr2R:17073474:17074552:+@chr2R:17074608:17075437:+.B.up_chr2R:17073474:17074552:+@chr2R:17074608:17075437:+.B.dn'	(0,0):99,(0,1):71,(1,0):5,(1,1):1486	0:64,1:1498	(0,0):133,(0,1):87,(1,0):20,(1,1):1704	0:164,1:1647	chr2R	+	1707347417073470	1707543717075430
chr3R:11107255:11107327:+@chr3R:11110335:11110484:+	ri	0.03	0.02	0.05	0.1	0.06	0.16	-0.07	3.75	'chr3R:11107255:11107327:+@chr3R:11110335:11110484:+.A.withRI','chr3R:11107255:11107327:+@chr3R:11110335:11110484:+.B.up_chr3R:11107255:11107327:+@chr3R:11110335:11110484:+.B.dn'	(0,0):248,(0,1):7,(1,0):41,(1,1):16	0:41,1:23	(0,0):306,(0,1):9,(1,0):108,(1,1):11	0:109,1:19	chr3R	+	1110725511107250	1111048411110480
chr3R:4604973:4605645:-@chr3R:4601040:4603663:-	ri	0.16	0.13	0.2	0.23	0.2	0.27	-0.07	3.72	'chr3R:4604973:4605645:-@chr3R:4601040:4603663:-.A.withRI','chr3R:4604973:4605645:-@chr3R:4601040:4603663:-.B.dn_chr3R:4604973:4605645:-@chr3R:4601040:4603663:-.B.up'	(0,0):74,(0,1):19,(1,0):95,(1,1):1337	0:342,1:1109	(0,0):92,(0,1):59,(1,0):201,(1,1):1777	0:609,1:1428	chr3R	-	46010404601040	46056454605645
chr3R:7418089:7418346:-@chr3R:7416894:7417029:-	ri	0.1	0.08	0.11	0.16	0.15	0.18	-0.06	1000000000000	'chr3R:7418089:7418346:-@chr3R:7416894:7417029:-.A.withRI','chr3R:7418089:7418346:-@chr3R:7416894:7417029:-.B.dn_chr3R:7418089:7418346:-@chr3R:7416894:7417029:-.B.up'	(0,0):272,(0,1):218,(1,0):207,(1,1):105	0:217,1:313	(0,0):524,(0,1):329,(1,0):538,(1,1):154	0:557,1:464	chr3R	-	74168947416894	74183467418346
chr2L:8042440:8042613:-@chr2L:8041771:8042125:-	ri	0.07	0.07	0.08	0.13	0.13	0.14	-0.06	1000000000000	'chr2L:8042440:8042613:-@chr2L:8041771:8042125:-.A.withRI','chr2L:8042440:8042613:-@chr2L:8041771:8042125:-.B.dn_chr2L:8042440:8042613:-@chr2L:8041771:8042125:-.B.up'	(0,0):2460,(0,1):4327,(1,0):768,(1,1):1770	0:883,1:5982	(0,0):2734,(0,1):4249,(1,0):1482,(1,1):1837	0:1729,1:5839	chr2L	-	80417718041771	80426138042613
chr2R:4563977:4564112:+@chr2R:4565935:4566373:+	ri	0.05	0.04	0.07	0.11	0.09	0.13	-0.06	317.14	'chr2R:4563977:4564112:+@chr2R:4565935:4566373:+.A.withRI','chr2R:4563977:4564112:+@chr2R:4565935:4566373:+.B.up_chr2R:4563977:4564112:+@chr2R:4565935:4566373:+.B.dn'	(0,0):83,(0,1):80,(1,0):68,(1,1):160	0:75,1:233	(0,0):110,(0,1):102,(1,0):162,(1,1):166	0:177,1:253	chr2R	+	45639774563977	45663734566373
chr2L:5985026:5985220:+@chr2L:5985343:5985559:+	ri	0.39	0.37	0.41	0.45	0.43	0.47	-0.06	73.43	'chr2L:5985026:5985220:+@chr2L:5985343:5985559:+.A.withRI','chr2L:5985026:5985220:+@chr2L:5985343:5985559:+.B.up_chr2L:5985026:5985220:+@chr2L:5985343:5985559:+.B.dn'	(0,0):2401,(0,1):200,(1,0):1444,(1,1):2772	0:2203,1:2213	(0,0):2633,(0,1):278,(1,0):1834,(1,1):2995	0:2917,1:2190	chr2L	+	59850265985026	59855595985559
chr2L:7698725:7698992:-@chr2L:7696594:7696777:-	ri	0.08	0.06	0.1	0.14	0.12	0.17	-0.06	28.9	'chr2L:7698725:7698992:-@chr2L:7696594:7696777:-.A.withRI','chr2L:7698725:7698992:-@chr2L:7696594:7696777:-.B.dn_chr2L:7698725:7698992:-@chr2L:7696594:7696777:-.B.up'	(0,0):350,(0,1):7,(1,0):120,(1,1):183	0:134,1:176	(0,0):449,(0,1):8,(1,0):249,(1,1):221	0:289,1:189	chr2L	-	76965947696594	76989927698992
chr2R:8757760:8757835:+@chr2R:8757908:8759608:+	ri	0.1	0.07	0.12	0.16	0.14	0.19	-0.06	15.34	'chr2R:8757760:8757835:+@chr2R:8757908:8759608:+.A.withRI','chr2R:8757760:8757835:+@chr2R:8757908:8759608:+.B.up_chr2R:8757760:8757835:+@chr2R:8757908:8759608:+.B.dn'	(0,0):52,(0,1):253,(1,0):54,(1,1):4011	0:499,1:3819	(0,0):67,(0,1):308,(1,0):114,(1,1):4802	0:942,1:4282	chr2R	+	87577608757760	87596088759608
chr3R:22912063:22912341:-@chr3R:22910021:22910205:-	ri	0.03	0.02	0.04	0.09	0.05	0.14	-0.06	14.75	'chr3R:22912063:22912341:-@chr3R:22910021:22910205:-.A.withRI','chr3R:22912063:22912341:-@chr3R:22910021:22910205:-.B.dn_chr3R:22912063:22912341:-@chr3R:22910021:22910205:-.B.up'	(0,0):30,(0,1):66,(1,0):31,(1,1):82	0:35,1:144	(0,0):8,(0,1):11,(1,0):25,(1,1):30	0:26,1:40	chr3R	-	2291002122910020	2291234122912340
chr3LHet:2397802:2398017:+@chr3LHet:2398128:2398454:+	ri	0.16	0.14	0.18	0.22	0.2	0.25	-0.06	14.37	'chr3LHet:2397802:2398017:+@chr3LHet:2398128:2398454:+.A.withRI','chr3LHet:2397802:2398017:+@chr3LHet:2398128:2398454:+.B.up_chr3LHet:2397802:2398017:+@chr3LHet:2398128:2398454:+.B.dn'	(0,0):623,(0,1):1,(1,0):243,(1,1):4750	0:1122,1:3872	(0,0):696,(0,1):4,(1,0):345,(1,1):4858	0:1463,1:3744	chr3LHet	+	23978022397802	23984542398454
chr3R:22084709:22084996:-@chr3R:22082947:22083763:-	ri	0.1	0.08	0.12	0.16	0.13	0.19	-0.06	9.98	'chr3R:22084709:22084996:-@chr3R:22082947:22083763:-.A.withRI','chr3R:22084709:22084996:-@chr3R:22082947:22083763:-.B.dn_chr3R:22084709:22084996:-@chr3R:22082947:22083763:-.B.up'	(0,0):128,(0,1):12,(1,0):92,(1,1):873	0:166,1:811	(0,0):132,(0,1):13,(1,0):151,(1,1):886	0:272,1:778	chr3R	-	2208294722082940	2208499622084990
chr3R:296836:297508:-@chr3R:294186:294321:-	ri	0.12	0.1	0.14	0.18	0.15	0.2	-0.06	7.54	'chr3R:296836:297508:-@chr3R:294186:294321:-.A.withRI','chr3R:296836:297508:-@chr3R:294186:294321:-.B.dn_chr3R:296836:297508:-@chr3R:294186:294321:-.B.up'	(0,0):134,(0,1):130,(1,0):159,(1,1):139	0:178,1:250	(0,0):208,(0,1):174,(1,0):294,(1,1):145	0:319,1:294	chr3R	-	294186294186	297508297508
chr3R:40845:41034:-@chr3R:30207:31507:-	ri	0.9	0.87	0.93	0.96	0.94	0.97	-0.06	5.42	'chr3R:40845:41034:-@chr3R:30207:31507:-.A.withRI','chr3R:40845:41034:-@chr3R:30207:31507:-.B.dn_chr3R:40845:41034:-@chr3R:30207:31507:-.B.up'	(0,0):79,(0,1):29,(1,0):5192,(1,1):462	0:5622,1:61	(0,0):71,(0,1):20,(1,0):6502,(1,1):392	0:6876,1:38	chr3R	-	3020730207	4103441034
chr3R:3498674:3498805:+@chr3R:3501017:3501184:+	ri	0.02	0.01	0.04	0.08	0.04	0.13	-0.06	4.09	'chr3R:3498674:3498805:+@chr3R:3501017:3501184:+.A.withRI','chr3R:3498674:3498805:+@chr3R:3501017:3501184:+.B.up_chr3R:3498674:3498805:+@chr3R:3501017:3501184:+.B.dn'	(0,0):6,(0,1):16,(1,0):10,(1,1):7	0:10,1:23	(0,0):15,(0,1):14,(1,0):27,(1,1):3	0:28,1:16	chr3R	+	34986743498674	35011843501184
chr2R:3963798:3963953:+@chr2R:3965236:3966123:+	ri	0.11	0.09	0.14	0.17	0.14	0.2	-0.06	3.39	'chr2R:3963798:3963953:+@chr2R:3965236:3966123:+.A.withRI','chr2R:3963798:3963953:+@chr2R:3965236:3966123:+.B.up_chr2R:3963798:3963953:+@chr2R:3965236:3966123:+.B.dn'	(0,0):102,(0,1):47,(1,0):90,(1,1):449	0:142,1:444	(0,0):135,(0,1):58,(1,0):174,(1,1):562	0:261,1:533	chr2R	+	39637983963798	39661233966123
chr3L:11814934:11815192:-@chr3L:11811354:11812007:-	ri	0.1	0.08	0.12	0.16	0.13	0.19	-0.06	3	'chr3L:11814934:11815192:-@chr3L:11811354:11812007:-.A.withRI','chr3L:11814934:11815192:-@chr3L:11811354:11812007:-.B.dn_chr3L:11814934:11815192:-@chr3L:11811354:11812007:-.B.up'	(0,0):48,(0,1):24,(1,0):94,(1,1):208	0:113,1:213	(0,0):61,(0,1):30,(1,0):152,(1,1):198	0:180,1:200	chr3L	-	1181135411811350	1181519211815190
chr3R:567574:569904:-@chr3R:563195:563484:-	ri	0.06	0.05	0.07	0.11	0.1	0.12	-0.05	1000000000000	'chr3R:567574:569904:-@chr3R:563195:563484:-.A.withRI','chr3R:567574:569904:-@chr3R:563195:563484:-.B.dn_chr3R:567574:569904:-@chr3R:563195:563484:-.B.up'	(0,0):154,(0,1):23,(1,0):173,(1,1):1577	0:278,1:1495	(0,0):250,(0,1):16,(1,0):307,(1,1):1626	0:447,1:1502	chr3R	-	563195563195	569904569904
chr3R:567574:569904:-@chr3R:563195:563502:-	ri	0.06	0.05	0.07	0.11	0.09	0.12	-0.05	1000000000000	'chr3R:567574:569904:-@chr3R:563195:563502:-.A.withRI','chr3R:567574:569904:-@chr3R:563195:563502:-.B.dn_chr3R:567574:569904:-@chr3R:563195:563502:-.B.up'	(0,0):140,(0,1):37,(1,0):164,(1,1):1586	0:274,1:1513	(0,0):227,(0,1):39,(1,0):301,(1,1):1632	0:466,1:1506	chr3R	-	563195563195	569904569904
chr3L:15940008:15940679:-@chr3L:15921860:15922028:-	ri	0.07	0.06	0.08	0.12	0.11	0.13	-0.05	1000000000000	'chr3L:15940008:15940679:-@chr3L:15921860:15922028:-.A.withRI','chr3L:15940008:15940679:-@chr3L:15921860:15922028:-.B.dn_chr3L:15940008:15940679:-@chr3L:15921860:15922028:-.B.up'	(0,0):93,(0,1):77,(1,0):1253,(1,1):558	0:1291,1:597	(0,0):143,(0,1):110,(1,0):2692,(1,1):662	0:2776,1:688	chr3L	-	1592186015921860	1594067915940670
chr2R:2520500:2520708:-@chr2R:2519532:2519644:-	ri	0.09	0.08	0.1	0.14	0.12	0.16	-0.05	7.89552e+07	'chr2R:2520500:2520708:-@chr2R:2519532:2519644:-.A.withRI','chr2R:2520500:2520708:-@chr2R:2519532:2519644:-.B.dn_chr2R:2520500:2520708:-@chr2R:2519532:2519644:-.B.up'	(0,0):613,(0,1):348,(1,0):290,(1,1):33	0:291,1:380	(0,0):692,(0,1):342,(1,0):446,(1,1):22	0:447,1:363	chr2R	-	25195322519532	25207082520708
chrX:10716425:10716691:-@chrX:10707282:10708126:-	ri	0.03	0.02	0.04	0.08	0.06	0.09	-0.05	140503	'chrX:10716425:10716691:-@chrX:10707282:10708126:-.A.withRI','chrX:10716425:10716691:-@chrX:10707282:10708126:-.B.dn_chrX:10716425:10716691:-@chrX:10707282:10708126:-.B.up'	(0,0):41,(0,1):3,(1,0):41,(1,1):148	0:45,1:147	(0,0):92,(0,1):1,(1,0):107,(1,1):159	0:118,1:149	chrX	-	1070728210707280	1071669110716690
chr3R:565233:565301:-@chr3R:563195:563502:-	ri	0.07	0.05	0.08	0.12	0.1	0.15	-0.05	947.94	'chr3R:565233:565301:-@chr3R:563195:563502:-.A.withRI','chr3R:565233:565301:-@chr3R:563195:563502:-.B.dn_chr3R:565233:565301:-@chr3R:563195:563502:-.B.up'	(0,0):80,(0,1):10,(1,0):123,(1,1):182	0:144,1:171	(0,0):173,(0,1):11,(1,0):241,(1,1):192	0:270,1:174	chr3R	-	563195563195	565301565301
chr3LHet:2397802:2397991:+@chr3LHet:2398128:2398454:+	ri	0.12	0.11	0.14	0.17	0.15	0.19	-0.05	876.1	'chr3LHet:2397802:2397991:+@chr3LHet:2398128:2398454:+.A.withRI','chr3LHet:2397802:2397991:+@chr3LHet:2398128:2398454:+.B.up_chr3LHet:2397802:2397991:+@chr3LHet:2398128:2398454:+.B.dn'	(0,0):618,(0,1):6,(1,0):248,(1,1):4745	0:737,1:4262	(0,0):694,(0,1):6,(1,0):353,(1,1):4850	0:1057,1:4152	chr3LHet	+	23978022397802	23984542398454
chr3LHet:2397802:2398001:+@chr3LHet:2398128:2398454:+	ri	0.14	0.12	0.15	0.19	0.17	0.21	-0.05	252.92	'chr3LHet:2397802:2398001:+@chr3LHet:2398128:2398454:+.A.withRI','chr3LHet:2397802:2398001:+@chr3LHet:2398128:2398454:+.B.up_chr3LHet:2397802:2398001:+@chr3LHet:2398128:2398454:+.B.dn'	(0,0):623,(0,1):1,(1,0):248,(1,1):4745	0:928,1:4066	(0,0):695,(0,1):5,(1,0):353,(1,1):4850	0:1414,1:3794	chr3LHet	+	23978022397802	23984542398454
chr2R:15591208:15591440:-@chr2R:15590560:15591137:-	ri	0.01	0	0.02	0.06	0.03	0.08	-0.05	191.81	'chr2R:15591208:15591440:-@chr2R:15590560:15591137:-.A.withRI','chr2R:15591208:15591440:-@chr2R:15590560:15591137:-.B.dn_chr2R:15591208:15591440:-@chr2R:15590560:15591137:-.B.up'	(0,0):11,(0,1):150,(1,0):4,(1,1):1111	0:16,1:1249	(0,0):13,(0,1):87,(1,0):16,(1,1):647	0:65,1:685	chr2R	-	1559056015590560	1559144015591440
chr3R:19812343:19812437:+@chr3R:19812754:19812932:+	ri	0.04	0.02	0.05	0.09	0.07	0.13	-0.05	12.86	'chr3R:19812343:19812437:+@chr3R:19812754:19812932:+.A.withRI','chr3R:19812343:19812437:+@chr3R:19812754:19812932:+.B.up_chr3R:19812343:19812437:+@chr3R:19812754:19812932:+.B.dn'	(0,0):61,(0,1):78,(1,0):16,(1,1):27	0:16,1:105	(0,0):54,(0,1):76,(1,0):43,(1,1):30	0:50,1:99	chr3R	+	1981234319812340	1981293219812930
chr2R:20815768:20815794:-@chr2R:20811937:20812164:-	ri	0.05	0.04	0.07	0.1	0.08	0.12	-0.05	11.74	'chr2R:20815768:20815794:-@chr2R:20811937:20812164:-.A.withRI','chr2R:20815768:20815794:-@chr2R:20811937:20812164:-.B.dn_chr2R:20815768:20815794:-@chr2R:20811937:20812164:-.B.up'	(0,0):36,(0,1):27,(1,0):202,(1,1):45	0:202,1:72	(0,0):58,(0,1):39,(1,0):559,(1,1):76	0:566,1:108	chr2R	-	2081193720811930	2081579420815790
chr2L:7698725:7698992:-@chr2L:7696594:7696807:-	ri	0.08	0.06	0.1	0.13	0.11	0.15	-0.05	9.73	'chr2L:7698725:7698992:-@chr2L:7696594:7696807:-.A.withRI','chr2L:7698725:7698992:-@chr2L:7696594:7696807:-.B.dn_chr2L:7698725:7698992:-@chr2L:7696594:7696807:-.B.up'	(0,0):334,(0,1):23,(1,0):117,(1,1):186	0:134,1:192	(0,0):418,(0,1):39,(1,0):241,(1,1):229	0:267,1:242	chr2L	-	76965947696594	76989927698992
chrX:11699924:11699938:-@chrX:11698930:11699075:-	ri	0.04	0.03	0.05	0.09	0.06	0.12	-0.05	9.37	'chrX:11699924:11699938:-@chrX:11698930:11699075:-.A.withRI','chrX:11699924:11699938:-@chrX:11698930:11699075:-.B.dn_chrX:11699924:11699938:-@chrX:11698930:11699075:-.B.up'	(0,0):558,(1,0):91,(1,1):64	0:96,1:59	(0,0):640,(1,0):148,(1,1):50	0:150,1:48	chrX	-	1169893011698930	1169993811699930
chr3R:8274800:8275447:+@chr3R:8280366:8280535:+	ri	0.11	0.09	0.12	0.16	0.13	0.18	-0.05	5.54	'chr3R:8274800:8275447:+@chr3R:8280366:8280535:+.A.withRI','chr3R:8274800:8275447:+@chr3R:8280366:8280535:+.B.up_chr3R:8274800:8275447:+@chr3R:8280366:8280535:+.B.dn'	(0,0):17,(0,1):73,(1,0):219,(1,1):171	0:230,1:233	(0,0):28,(0,1):94,(1,0):344,(1,1):157	0:365,1:230	chr3R	+	82748008274800	82805358280535
chr3L:19257928:19258543:+@chr3L:19259694:19259938:+	ri	0.88	0.85	0.9	0.93	0.91	0.95	-0.05	4.17	'chr3L:19257928:19258543:+@chr3L:19259694:19259938:+.A.withRI','chr3L:19257928:19258543:+@chr3L:19259694:19259938:+.B.up_chr3L:19257928:19258543:+@chr3L:19259694:19259938:+.B.dn'	(0,0):24,(0,1):48,(1,0):1170,(1,1):136	0:1290,1:64	(0,0):44,(0,1):35,(1,0):1663,(1,1):164	0:1816,1:46	chr3L	+	1925792819257920	1925993819259930
chr3R:24962204:24962421:+@chr3R:24962804:24963008:+	ri	0.02	0	0.04	0.07	0.04	0.11	-0.05	3.76	'chr3R:24962204:24962421:+@chr3R:24962804:24963008:+.A.withRI','chr3R:24962204:24962421:+@chr3R:24962804:24963008:+.B.up_chr3R:24962204:24962421:+@chr3R:24962804:24963008:+.B.dn'	(0,0):80,(0,1):41,(1,0):2,(1,1):39	0:2,1:80	(0,0):160,(0,1):46,(1,0):16,(1,1):60	0:24,1:98	chr3R	+	2496220424962200	2496300824963000
chr2R:19823348:19823408:-@chr2R:19820190:19820337:-	ri	0.04	0.03	0.05	0.09	0.06	0.13	-0.05	3.65	'chr2R:19823348:19823408:-@chr2R:19820190:19820337:-.A.withRI','chr2R:19823348:19823408:-@chr2R:19820190:19820337:-.B.dn_chr2R:19823348:19823408:-@chr2R:19820190:19820337:-.B.up'	(0,0):164,(0,1):36,(1,0):125,(1,1):15	0:126,1:50	(0,0):120,(0,1):9,(1,0):124,(1,1):13	0:125,1:21	chr2R	-	1982019019820190	1982340819823400
chr2RHet:207045:207155:+@chr2RHet:232563:232695:+	ri	0.06	0.04	0.07	0.11	0.08	0.15	-0.05	3.26	'chr2RHet:207045:207155:+@chr2RHet:232563:232695:+.A.withRI','chr2RHet:207045:207155:+@chr2RHet:232563:232695:+.B.up_chr2RHet:207045:207155:+@chr2RHet:232563:232695:+.B.dn'	(0,0):120,(0,1):46,(1,0):1333,(1,1):12	0:1333,1:58	(0,0):127,(0,1):24,(1,0):1340,(1,1):6	0:1341,1:29	chr2RHet	+	207045207045	232695232695
chr3R:5180647:5180805:+@chr3R:5183706:5183898:+	ri	0.06	0.06	0.07	0.1	0.09	0.11	-0.04	1000000000000	'chr3R:5180647:5180805:+@chr3R:5183706:5183898:+.A.withRI','chr3R:5180647:5180805:+@chr3R:5183706:5183898:+.B.up_chr3R:5180647:5180805:+@chr3R:5183706:5183898:+.B.dn'	(0,0):250,(0,1):327,(1,0):641,(1,1):158	0:650,1:476	(0,0):363,(0,1):386,(1,0):1210,(1,1):196	0:1228,1:564	chr3R	+	51806475180647	51838985183898
chr2L:5985026:5985220:+@chr2L:5985339:5985559:+	ri	0.22	0.2	0.23	0.26	0.25	0.28	-0.04	1000000000000	'chr2L:5985026:5985220:+@chr2L:5985339:5985559:+.A.withRI','chr2L:5985026:5985220:+@chr2L:5985339:5985559:+.B.up_chr2L:5985026:5985220:+@chr2L:5985339:5985559:+.B.dn'	(0,0):765,(0,1):1836,(1,0):1368,(1,1):2848	0:1785,1:4267	(0,0):1039,(0,1):1872,(1,0):1758,(1,1):3071	0:2389,1:4312	chr2L	+	59850265985026	59855595985559
chr3R:567574:569904:-@chr3R:563195:563460:-	ri	0.07	0.06	0.08	0.11	0.1	0.12	-0.04	3.28548e+06	'chr3R:567574:569904:-@chr3R:563195:563460:-.A.withRI','chr3R:567574:569904:-@chr3R:563195:563460:-.B.dn_chr3R:567574:569904:-@chr3R:563195:563460:-.B.up'	(0,0):140,(0,1):37,(1,0):192,(1,1):1558	0:290,1:1497	(0,0):227,(0,1):39,(1,0):319,(1,1):1614	0:501,1:1471	chr3R	-	563195563195	569904569904
chr3R:565294:565301:-@chr3R:563195:563502:-	ri	0.05	0.04	0.06	0.09	0.07	0.1	-0.04	4101.61	'chr3R:565294:565301:-@chr3R:563195:563502:-.A.withRI','chr3R:565294:565301:-@chr3R:563195:563502:-.B.dn_chr3R:565294:565301:-@chr3R:563195:563502:-.B.up'	(0,0):89,(0,1):1,(1,0):123,(1,1):182	0:131,1:175	(0,0):183,(0,1):1,(1,0):241,(1,1):192	0:266,1:168	chr3R	-	563195563195	565301565301
chr2L:1163000:1163149:-@chr2L:1161927:1162146:-	ri	0.03	0.03	0.04	0.07	0.05	0.08	-0.04	2783.65	'chr2L:1163000:1163149:-@chr2L:1161927:1162146:-.A.withRI','chr2L:1163000:1163149:-@chr2L:1161927:1162146:-.B.dn_chr2L:1163000:1163149:-@chr2L:1161927:1162146:-.B.up'	(0,0):281,(0,1):350,(1,0):93,(1,1):124	0:101,1:466	(0,0):196,(0,1):188,(1,0):111,(1,1):104	0:119,1:284	chr2L	-	11619271161927	11631491163149
chr3L:10639963:10640226:-@chr3L:10634632:10634894:-	ri	0.05	0.04	0.06	0.09	0.08	0.1	-0.04	434.91	'chr3L:10639963:10640226:-@chr3L:10634632:10634894:-.A.withRI','chr3L:10639963:10640226:-@chr3L:10634632:10634894:-.B.dn_chr3L:10639963:10640226:-@chr3L:10634632:10634894:-.B.up'	(0,0):96,(0,1):114,(1,0):160,(1,1):83	0:164,1:193	(0,0):131,(0,1):131,(1,0):353,(1,1):108	0:365,1:227	chr3L	-	1063463210634630	1064022610640220
chr2L:7698725:7698992:-@chr2L:7696028:7696206:-	ri	0.06	0.05	0.07	0.1	0.08	0.11	-0.04	244.98	'chr2L:7698725:7698992:-@chr2L:7696028:7696206:-.A.withRI','chr2L:7698725:7698992:-@chr2L:7696028:7696206:-.B.dn_chr2L:7698725:7698992:-@chr2L:7696028:7696206:-.B.up'	(0,0):617,(0,1):3,(1,0):146,(1,1):250	0:158,1:241	(0,0):738,(0,1):3,(1,0):297,(1,1):305	0:319,1:286	chr2L	-	76960287696028	76989927698992
chrX:6985707:6986155:-@chrX:6981647:6981692:-	ri	0.07	0.06	0.09	0.11	0.09	0.13	-0.04	14.83	'chrX:6985707:6986155:-@chrX:6981647:6981692:-.A.withRI','chrX:6985707:6986155:-@chrX:6981647:6981692:-.B.dn_chrX:6985707:6986155:-@chrX:6981647:6981692:-.B.up'	(0,0):188,(0,1):11,(1,0):313,(1,1):304	0:335,1:293	(0,0):144,(0,1):5,(1,0):329,(1,1):214	0:351,1:197	chrX	-	69816476981647	69861556986155
chrX:6991978:6992086:-@chrX:6985707:6986203:-	ri	0.09	0.08	0.1	0.13	0.11	0.15	-0.04	3.58	'chrX:6991978:6992086:-@chrX:6985707:6986203:-.A.withRI','chrX:6991978:6992086:-@chrX:6985707:6986203:-.B.dn_chrX:6991978:6992086:-@chrX:6985707:6986203:-.B.up'	(0,0):210,(0,1):2,(1,0):450,(1,1):359	0:471,1:340	(0,0):135,(0,1):2,(1,0):437,(1,1):247	0:457,1:229	chrX	-	69857076985707	69920866992086
chr2R:15284129:15284275:-@chr2R:15283692:15284067:-	ri	0.01	0.01	0.02	0.04	0.03	0.05	-0.03	1000000000000	'chr2R:15284129:15284275:-@chr2R:15283692:15284067:-.A.withRI','chr2R:15284129:15284275:-@chr2R:15283692:15284067:-.B.dn_chr2R:15284129:15284275:-@chr2R:15283692:15284067:-.B.up'	(0,0):25,(0,1):1010,(1,0):35,(1,1):4640	0:85,1:5600	(0,0):24,(0,1):883,(1,0):95,(1,1):3905	0:216,1:4667	chr2R	-	1528369215283690	1528427515284270
chr2R:18494439:18494553:+@chr2R:18495260:18495544:+	ri	0.16	0.15	0.17	0.19	0.19	0.2	-0.03	1000000000000	'chr2R:18494439:18494553:+@chr2R:18495260:18495544:+.A.withRI','chr2R:18494439:18494553:+@chr2R:18495260:18495544:+.B.up_chr2R:18494439:18494553:+@chr2R:18495260:18495544:+.B.dn'	(0,0):402,(0,1):1421,(1,0):1638,(1,1):793	0:1757,1:2095	(0,0):388,(0,1):1566,(1,0):2241,(1,1):828	0:2381,1:2254	chr2R	+	1849443918494430	1849554418495540
chr3R:26033816:26034147:-@chr3R:26032170:26032443:-	ri	0.17	0.16	0.18	0.2	0.19	0.21	-0.03	8.95e+06	'chr3R:26033816:26034147:-@chr3R:26032170:26032443:-.A.withRI','chr3R:26033816:26034147:-@chr3R:26032170:26032443:-.B.dn_chr3R:26033816:26034147:-@chr3R:26032170:26032443:-.B.up'	(0,0):3199,(0,1):1396,(1,0):3359,(1,1):3631	0:3974,1:4412	(0,0):3403,(0,1):1483,(1,0):4089,(1,1):3738	0:4841,1:4469	chr3R	-	2603217026032170	2603414726034140
chr2R:2520500:2520708:-@chr2R:2519532:2519645:-	ri	0.07	0.06	0.08	0.1	0.09	0.11	-0.03	16059.3	'chr2R:2520500:2520708:-@chr2R:2519532:2519645:-.A.withRI','chr2R:2520500:2520708:-@chr2R:2519532:2519645:-.B.dn_chr2R:2520500:2520708:-@chr2R:2519532:2519645:-.B.up'	(0,0):471,(0,1):490,(1,0):290,(1,1):33	0:294,1:519	(0,0):534,(0,1):500,(1,0):446,(1,1):22	0:447,1:521	chr2R	-	25195322519532	25207082520708
chr2L:1161290:1161869:-@chr2L:1160290:1161219:-	ri	0	0	0.01	0.03	0.01	0.04	-0.03	19.77	'chr2L:1161290:1161869:-@chr2L:1160290:1161219:-.A.withRI','chr2L:1161290:1161869:-@chr2L:1160290:1161219:-.B.dn_chr2L:1161290:1161869:-@chr2L:1160290:1161219:-.B.up'	(0,0):257,(0,1):420,(1,0):1,(1,1):4835	0:13,1:5243	(0,0):159,(0,1):259,(1,0):13,(1,1):3094	0:104,1:3262	chr2L	-	11602901160290	11618691161869
chr3R:1077146:1077338:-@chr3R:1069560:1069976:-	ri	0.08	0.07	0.09	0.11	0.1	0.13	-0.03	14.71	'chr3R:1077146:1077338:-@chr3R:1069560:1069976:-.A.withRI','chr3R:1077146:1077338:-@chr3R:1069560:1069976:-.B.dn_chr3R:1077146:1077338:-@chr3R:1069560:1069976:-.B.up'	(0,0):181,(0,1):73,(1,0):482,(1,1):274	0:498,1:331	(0,0):222,(0,1):66,(1,0):614,(1,1):242	0:651,1:271	chr3R	-	10695601069560	10773381077338
chrX:9682373:9682662:+@chrX:9705821:9706189:+	ri	0.08	0.07	0.09	0.11	0.09	0.13	-0.03	14.29	'chrX:9682373:9682662:+@chrX:9705821:9706189:+.A.withRI','chrX:9682373:9682662:+@chrX:9705821:9706189:+.B.up_chrX:9682373:9682662:+@chrX:9705821:9706189:+.B.dn'	(0,0):78,(0,1):85,(1,0):978,(1,1):164	0:990,1:237	(0,0):58,(0,1):73,(1,0):1064,(1,1):113	0:1081,1:169	chrX	+	96823739682373	97061899706189
chrX:12547659:12548201:+@chrX:12549204:12549349:+	ri	0.04	0.03	0.05	0.07	0.06	0.09	-0.03	8.28	'chrX:12547659:12548201:+@chrX:12549204:12549349:+.A.withRI','chrX:12547659:12548201:+@chrX:12549204:12549349:+.B.up_chrX:12547659:12548201:+@chrX:12549204:12549349:+.B.dn'	(0,0):149,(0,1):293,(1,0):65,(1,1):397	0:80,1:675	(0,0):159,(0,1):230,(1,0):107,(1,1):366	0:137,1:566	chrX	+	1254765912547650	1254934912549340
chr2L:21311193:21311306:+@chr2L:21311753:21312043:+	ri	0.02	0.01	0.03	0.05	0.04	0.06	-0.03	5.81	'chr2L:21311193:21311306:+@chr2L:21311753:21312043:+.A.withRI','chr2L:21311193:21311306:+@chr2L:21311753:21312043:+.B.up_chr2L:21311193:21311306:+@chr2L:21311753:21312043:+.B.dn'	(0,0):535,(0,1):2,(1,0):29,(1,1):605	0:50,1:586	(0,0):573,(0,1):1,(1,0):65,(1,1):617	0:97,1:586	chr2L	+	2131119321311190	2131204321312040
chr2L:21179330:21179729:-@chr2L:21177571:21177678:-	ri	0.03	0.02	0.04	0.06	0.04	0.08	-0.03	5.29	'chr2L:21179330:21179729:-@chr2L:21177571:21177678:-.A.withRI','chr2L:21179330:21179729:-@chr2L:21177571:21177678:-.B.dn_chr2L:21179330:21179729:-@chr2L:21177571:21177678:-.B.up'	(0,0):26,(0,1):49,(1,0):30,(1,1):150	0:35,1:194	(0,0):33,(0,1):42,(1,0):56,(1,1):127	0:66,1:159	chr2L	-	2117757121177570	2117972921179720
chr2L:8088448:8088453:+@chr2L:8089491:8089736:+	ri	0.09	0.09	0.1	0.12	0.11	0.13	-0.03	4.36	'chr2L:8088448:8088453:+@chr2L:8089491:8089736:+.A.withRI','chr2L:8088448:8088453:+@chr2L:8089491:8089736:+.B.up_chr2L:8088448:8088453:+@chr2L:8089491:8089736:+.B.dn'	(0,0):511,(1,0):917,(1,1):652	0:976,1:593	(0,0):491,(1,0):1042,(1,1):599	0:1110,1:531	chr2L	+	80884488088448	80897368089736
chr3LHet:2397802:2397858:+@chr3LHet:2398128:2398454:+	ri	0.04	0.03	0.04	0.06	0.05	0.07	-0.02	518382280	'chr3LHet:2397802:2397858:+@chr3LHet:2398128:2398454:+.A.withRI','chr3LHet:2397802:2397858:+@chr3LHet:2398128:2398454:+.B.up_chr3LHet:2397802:2397858:+@chr3LHet:2398128:2398454:+.B.dn'	(0,0):622,(0,1):2,(1,0):271,(1,1):4722	0:456,1:4539	(0,0):700,(1,0):402,(1,1):4801	0:680,1:4523	chr3LHet	+	23978022397802	23984542398454
chr2L:18443153:18443200:-@chr2L:18442505:18443070:-	ri	0	0	0.01	0.02	0.02	0.03	-0.02	9.1204e+07	'chr2L:18443153:18443200:-@chr2L:18442505:18443070:-.A.withRI','chr2L:18443153:18443200:-@chr2L:18442505:18443070:-.B.dn_chr2L:18443153:18443200:-@chr2L:18442505:18443070:-.B.up'	(0,0):704,(0,1):605,(1,0):6,(1,1):4212	0:26,1:4797	(0,0):697,(0,1):598,(1,0):39,(1,1):4738	0:135,1:5240	chr2L	-	1844250518442500	1844320018443200
chr3R:16699674:16699722:+@chr3R:16699782:16700214:+	ri	0.01	0.01	0.02	0.03	0.03	0.04	-0.02	4.55455e+06	'chr3R:16699674:16699722:+@chr3R:16699782:16700214:+.A.withRI','chr3R:16699674:16699722:+@chr3R:16699782:16700214:+.B.up_chr3R:16699674:16699722:+@chr3R:16699782:16700214:+.B.dn'	(0,0):387,(0,1):721,(1,0):23,(1,1):4134	0:63,1:4815	(0,0):662,(0,1):1046,(1,0):98,(1,1):6889	0:306,1:7727	chr3R	+	1669967416699670	1670021416700210
chr3LHet:2397802:2397840:+@chr3LHet:2398128:2398454:+	ri	0.03	0.03	0.04	0.05	0.04	0.06	-0.02	1.22956e+06	'chr3LHet:2397802:2397840:+@chr3LHet:2398128:2398454:+.A.withRI','chr3LHet:2397802:2397840:+@chr3LHet:2398128:2398454:+.B.up_chr3LHet:2397802:2397840:+@chr3LHet:2398128:2398454:+.B.dn'	(0,0):624,(1,0):271,(1,1):4722	0:417,1:4576	(0,0):700,(1,0):402,(1,1):4801	0:668,1:4535	chr3LHet	+	23978022397802	23984542398454
chr3R:26214535:26214624:+@chr3R:26214921:26215050:+	ri	0.02	0.01	0.02	0.04	0.03	0.05	-0.02	8949.98	'chr3R:26214535:26214624:+@chr3R:26214921:26215050:+.A.withRI','chr3R:26214535:26214624:+@chr3R:26214921:26215050:+.B.up_chr3R:26214535:26214624:+@chr3R:26214921:26215050:+.B.dn'	(0,0):55,(0,1):343,(1,0):42,(1,1):24	0:42,1:367	(0,0):66,(0,1):433,(1,0):118,(1,1):41	0:118,1:474	chr3R	+	2621453526214530	2621505026215050
chr3R:27435042:27435796:-@chr3R:27427138:27427952:-	ri	0.12	0.11	0.12	0.14	0.13	0.15	-0.02	4935.66	'chr3R:27435042:27435796:-@chr3R:27427138:27427952:-.A.withRI','chr3R:27435042:27435796:-@chr3R:27427138:27427952:-.B.dn_chr3R:27435042:27435796:-@chr3R:27427138:27427952:-.B.up'	(0,0):351,(0,1):301,(1,0):1800,(1,1):2573	0:2105,1:2569	(0,0):414,(0,1):264,(1,0):2154,(1,1):2591	0:2505,1:2504	chr3R	-	2742713827427130	2743579627435790
chr3LHet:2397802:2397819:+@chr3LHet:2398128:2398454:+	ri	0.02	0.02	0.03	0.04	0.03	0.04	-0.02	2364.01	'chr3LHet:2397802:2397819:+@chr3LHet:2398128:2398454:+.A.withRI','chr3LHet:2397802:2397819:+@chr3LHet:2398128:2398454:+.B.up_chr3LHet:2397802:2397819:+@chr3LHet:2398128:2398454:+.B.dn'	(0,0):187,(0,1):437,(1,0):271,(1,1):4722	0:393,1:5037	(0,0):216,(0,1):484,(1,0):402,(1,1):4801	0:559,1:5128	chr3LHet	+	23978022397802	23984542398454
chr3R:16624037:16624131:+@chr3R:16631672:16631963:+	ri	0.04	0.04	0.05	0.06	0.06	0.07	-0.02	2165.82	'chr3R:16624037:16624131:+@chr3R:16631672:16631963:+.A.withRI','chr3R:16624037:16624131:+@chr3R:16631672:16631963:+.B.up_chr3R:16624037:16624131:+@chr3R:16631672:16631963:+.B.dn'	(0,0):467,(0,1):22,(1,0):753,(1,1):397	0:766,1:406	(0,0):610,(0,1):18,(1,0):1041,(1,1):398	0:1074,1:383	chr3R	+	1662403716624030	1663196316631960
chr3R:16624037:16624131:+@chr3R:16631669:16631963:+	ri	0.04	0.04	0.05	0.06	0.05	0.07	-0.02	1167.97	'chr3R:16624037:16624131:+@chr3R:16631669:16631963:+.A.withRI','chr3R:16624037:16624131:+@chr3R:16631669:16631963:+.B.up_chr3R:16624037:16624131:+@chr3R:16631669:16631963:+.B.dn'	(0,0):445,(0,1):44,(1,0):752,(1,1):398	0:771,1:423	(0,0):586,(0,1):42,(1,0):1041,(1,1):398	0:1071,1:410	chr3R	+	1662403716624030	1663196316631960
chr2R:14424272:14424574:+@chr2R:14424739:14426924:+	ri	0.01	0	0.01	0.03	0.02	0.04	-0.02	138.19	'chr2R:14424272:14424574:+@chr2R:14424739:14426924:+.A.withRI','chr2R:14424272:14424574:+@chr2R:14424739:14426924:+.B.up_chr2R:14424272:14424574:+@chr2R:14424739:14426924:+.B.dn'	(0,0):117,(0,1):576,(1,0):8,(1,1):6998	0:46,1:7536	(0,0):127,(0,1):563,(1,0):34,(1,1):9244	0:338,1:9503	chr2R	+	1442427214424270	1442692414426920
chr3R:22086876:22087046:-@chr3R:22082947:22083763:-	ri	0.05	0.04	0.05	0.07	0.06	0.08	-0.02	16.22	'chr3R:22086876:22087046:-@chr3R:22082947:22083763:-.A.withRI','chr3R:22086876:22087046:-@chr3R:22082947:22083763:-.B.dn_chr3R:22086876:22087046:-@chr3R:22082947:22083763:-.B.up'	(0,0):137,(0,1):5,(1,0):156,(1,1):862	0:190,1:833	(0,0):147,(0,1):2,(1,0):233,(1,1):876	0:291,1:820	chr3R	-	2208294722082940	2208704622087040
chr3L:271640:271694:+@chr3L:273550:274030:+	ri	0.06	0.05	0.06	0.08	0.07	0.09	-0.02	9.55	'chr3L:271640:271694:+@chr3L:273550:274030:+.A.withRI','chr3L:271640:271694:+@chr3L:273550:274030:+.B.up_chr3L:271640:271694:+@chr3L:273550:274030:+.B.dn'	(0,0):195,(1,0):206,(1,1):678	0:255,1:629	(0,0):260,(0,1):1,(1,0):322,(1,1):741	0:377,1:687	chr3L	+	271640271640	274030274030
chr3R:22086880:22087046:-@chr3R:22082947:22083763:-	ri	0.05	0.04	0.05	0.07	0.06	0.08	-0.02	8.32	'chr3R:22086880:22087046:-@chr3R:22082947:22083763:-.A.withRI','chr3R:22086880:22087046:-@chr3R:22082947:22083763:-.B.dn_chr3R:22086880:22087046:-@chr3R:22082947:22083763:-.B.up'	(0,0):137,(0,1):5,(1,0):156,(1,1):862	0:192,1:831	(0,0):148,(0,1):1,(1,0):233,(1,1):876	0:281,1:829	chr3R	-	2208294722082940	2208704622087040
chr3R:5850737:5850805:-@chr3R:5845427:5847105:-	ri	0.02	0.02	0.02	0.03	0.03	0.04	-0.01	1000000000000	'chr3R:5850737:5850805:-@chr3R:5845427:5847105:-.A.withRI','chr3R:5850737:5850805:-@chr3R:5845427:5847105:-.B.dn_chr3R:5850737:5850805:-@chr3R:5845427:5847105:-.B.up'	(0,0):396,(0,1):97,(1,0):180,(1,1):4069	0:267,1:4079	(0,0):346,(0,1):103,(1,0):381,(1,1):4529	0:543,1:4470	chr3R	-	58454275845427	58508055850805
chr3R:16625361:16625403:+@chr3R:16631669:16631963:+	ri	0.04	0.03	0.04	0.05	0.05	0.06	-0.01	669269	'chr3R:16625361:16625403:+@chr3R:16631669:16631963:+.A.withRI','chr3R:16625361:16625403:+@chr3R:16631669:16631963:+.B.up_chr3R:16625361:16625403:+@chr3R:16631669:16631963:+.B.dn'	(0,0):328,(1,0):639,(1,1):398	0:649,1:388	(0,0):430,(0,1):1,(1,0):958,(1,1):398	0:979,1:378	chr3R	+	1662536116625360	1663196316631960
chr2R:3198898:3199008:+@chr2R:3199437:3199616:+	ri	0.03	0.03	0.03	0.04	0.04	0.05	-0.01	325852	'chr2R:3198898:3199008:+@chr2R:3199437:3199616:+.A.withRI','chr2R:3198898:3199008:+@chr2R:3199437:3199616:+.B.up_chr2R:3198898:3199008:+@chr2R:3199437:3199616:+.B.dn'	(0,0):1086,(0,1):2977,(1,0):590,(1,1):653	0:608,1:3612	(0,0):581,(0,1):1690,(1,0):462,(1,1):382	0:477,1:2057	chr2R	+	31988983198898	31996163199616
chr3R:13508124:13508171:-@chr3R:13502559:13503900:-	ri	0.03	0.02	0.03	0.04	0.04	0.05	-0.01	885.52	'chr3R:13508124:13508171:-@chr3R:13502559:13503900:-.A.withRI','chr3R:13508124:13508171:-@chr3R:13502559:13503900:-.B.dn_chr3R:13508124:13508171:-@chr3R:13502559:13503900:-.B.up'	(0,0):122,(0,1):5,(1,0):130,(1,1):1420	0:170,1:1385	(0,0):176,(0,1):12,(1,0):262,(1,1):1774	0:344,1:1704	chr3R	-	1350255913502550	1350817113508170
chr2L:21311193:21311214:+@chr2L:21311753:21312043:+	ri	0.01	0.01	0.02	0.02	0.02	0.03	-0.01	13.38	'chr2L:21311193:21311214:+@chr2L:21311753:21312043:+.A.withRI','chr2L:21311193:21311214:+@chr2L:21311753:21312043:+.B.up_chr2L:21311193:21311214:+@chr2L:21311753:21312043:+.B.dn'	(0,0):535,(0,1):2,(1,0):29,(1,1):605	0:32,1:604	(0,0):574,(1,0):65,(1,1):617	0:82,1:600	chr2L	+	2131119321311190	2131204321312040
chr4:176391:176668:-@chr4:175653:175773:-	ri	0.02	0.01	0.02	0.03	0.03	0.04	-0.01	8.85	'chr4:176391:176668:-@chr4:175653:175773:-.A.withRI','chr4:176391:176668:-@chr4:175653:175773:-.B.dn_chr4:176391:176668:-@chr4:175653:175773:-.B.up'	(0,0):261,(0,1):728,(1,0):62,(1,1):212	0:64,1:938	(0,0):179,(0,1):441,(1,0):79,(1,1):171	0:86,1:605	chr4	-	175653175653	176668176668
chr4:1093787:1094007:+@chr4:1094065:1096183:+	ri	0.02	0.01	0.02	0.03	0.02	0.03	-0.01	7.56	'chr4:1093787:1094007:+@chr4:1094065:1096183:+.A.withRI','chr4:1093787:1094007:+@chr4:1094065:1096183:+.B.up_chr4:1093787:1094007:+@chr4:1094065:1096183:+.B.dn'	(0,0):2447,(0,1):2308,(1,0):70,(1,1):46528	0:773,1:48133	(0,0):2149,(0,1):2027,(1,0):104,(1,1):42232	0:1128,1:43235	chr4	+	10937871093787	10961831096183
chr3R:26714607:26714809:-@chr3R:26712344:26712626:-	ri	0.05	0.04	0.05	0.06	0.05	0.07	-0.01	3.88	'chr3R:26714607:26714809:-@chr3R:26712344:26712626:-.A.withRI','chr3R:26714607:26714809:-@chr3R:26712344:26712626:-.B.dn_chr3R:26714607:26714809:-@chr3R:26712344:26712626:-.B.up'	(0,0):1719,(0,1):125,(1,0):314,(1,1):840	0:353,1:926	(0,0):1772,(0,1):90,(1,0):480,(1,1):1050	0:547,1:1073	chr3R	-	2671234426712340	2671480926714800
chr2R:7782456:7782601:+@chr2R:7782661:7782844:+	ri	1	1	1	0.99	0.98	0.99	0.01	13265.4	'chr2R:7782456:7782601:+@chr2R:7782661:7782844:+.A.withRI','chr2R:7782456:7782601:+@chr2R:7782661:7782844:+.B.up_chr2R:7782456:7782601:+@chr2R:7782661:7782844:+.B.dn'	(0,0):6952,(0,1):1,(1,0):14672,(1,1):5720	0:20380,1:13	(0,0):8214,(0,1):12,(1,0):16988,(1,1):6497	0:23273,1:224	chr2R	+	77824567782456	77828447782844
chr3L:3192969:3193367:+@chr3L:3194499:3197061:+	ri	0.03	0.03	0.04	0.02	0.02	0.02	0.01	1805.64	'chr3L:3192969:3193367:+@chr3L:3194499:3197061:+.A.withRI','chr3L:3192969:3193367:+@chr3L:3194499:3197061:+.B.up_chr3L:3192969:3193367:+@chr3L:3194499:3197061:+.B.dn'	(0,0):191,(0,1):1420,(1,0):293,(1,1):17134	0:844,1:18003	(0,0):255,(0,1):2058,(1,0):247,(1,1):21995	0:721,1:23579	chr3L	+	31929693192969	31970613197061
chr3L:6712105:6712624:-@chr3L:6711004:6711115:-	ri	0.02	0.01	0.02	0.01	0	0.01	0.01	1189.64	'chr3L:6712105:6712624:-@chr3L:6711004:6711115:-.A.withRI','chr3L:6712105:6712624:-@chr3L:6711004:6711115:-.B.dn_chr3L:6712105:6712624:-@chr3L:6711004:6711115:-.B.up'	(0,0):62,(0,1):114,(1,0):45,(1,1):1073	0:61,1:1171	(0,0):300,(0,1):600,(1,0):76,(1,1):4745	0:103,1:5318	chr3L	-	67110046711004	67126246712624
chr2R:3665980:3667390:-@chr2R:3625267:3629425:-	ri	0.1	0.09	0.1	0.08	0.07	0.08	0.02	236951	'chr2R:3665980:3667390:-@chr2R:3625267:3629425:-.A.withRI','chr2R:3665980:3667390:-@chr2R:3625267:3629425:-.B.dn_chr2R:3665980:3667390:-@chr2R:3625267:3629425:-.B.up'	(0,0):290,(0,1):8,(1,0):1871,(1,1):2838	0:2159,1:2558	(0,0):287,(0,1):12,(1,0):1754,(1,1):3289	0:2007,1:3048	chr2R	-	36252673625267	36673903667390
chr2R:3665980:3667390:-@chr2R:3625267:3629383:-	ri	0.1	0.09	0.1	0.08	0.08	0.09	0.02	2853.1	'chr2R:3665980:3667390:-@chr2R:3625267:3629383:-.A.withRI','chr2R:3665980:3667390:-@chr2R:3625267:3629383:-.B.dn_chr2R:3665980:3667390:-@chr2R:3625267:3629383:-.B.up'	(0,0):297,(0,1):1,(1,0):1899,(1,1):2810	0:2153,1:2557	(0,0):296,(0,1):3,(1,0):1798,(1,1):3245	0:2055,1:2991	chr2R	-	36252673625267	36673903667390
chr2L:12407209:12407466:-@chr2L:12403270:12404177:-	ri	0.09	0.08	0.1	0.07	0.07	0.08	0.02	20.65	'chr2L:12407209:12407466:-@chr2L:12403270:12404177:-.A.withRI','chr2L:12407209:12407466:-@chr2L:12403270:12404177:-.B.dn_chr2L:12407209:12407466:-@chr2L:12403270:12404177:-.B.up'	(0,0):623,(0,1):70,(1,0):752,(1,1):2525	0:1013,1:2334	(0,0):716,(0,1):66,(1,0):700,(1,1):3042	0:907,1:2901	chr2L	-	1240327012403270	1240746612407460
chr2L:13203768:13204272:+@chr2L:13208110:13208360:+	ri	0.03	0.02	0.03	0.01	0.01	0.02	0.02	6.27	'chr2L:13203768:13204272:+@chr2L:13208110:13208360:+.A.withRI','chr2L:13203768:13204272:+@chr2L:13208110:13208360:+.B.up_chr2L:13203768:13204272:+@chr2L:13208110:13208360:+.B.dn'	(0,0):60,(0,1):177,(1,0):79,(1,1):224	0:85,1:395	(0,0):112,(0,1):275,(1,0):70,(1,1):397	0:73,1:669	chr2L	+	1320376813203760	1320836013208360
chr3R:27043462:27043666:-@chr3R:27042432:27042899:-	ri	0.88	0.87	0.89	0.85	0.84	0.86	0.03	177.92	'chr3R:27043462:27043666:-@chr3R:27042432:27042899:-.A.withRI','chr3R:27043462:27043666:-@chr3R:27042432:27042899:-.B.dn_chr3R:27043462:27043666:-@chr3R:27042432:27042899:-.B.up'	(0,0):335,(0,1):434,(1,0):8312,(1,1):1312	0:9465,1:593	(0,0):394,(0,1):473,(1,0):7281,(1,1):1526	0:8528,1:752	chr3R	-	2704243227042430	2704366627043660
chr3L:22753159:22753340:+@chr3L:22770211:22771924:+	ri	0.11	0.1	0.12	0.08	0.07	0.09	0.03	16.99	'chr3L:22753159:22753340:+@chr3L:22770211:22771924:+.A.withRI','chr3L:22753159:22753340:+@chr3L:22770211:22771924:+.B.up_chr3L:22753159:22753340:+@chr3L:22770211:22771924:+.B.dn'	(0,0):58,(0,1):5,(1,0):670,(1,1):605	0:743,1:537	(0,0):77,(0,1):6,(1,0):691,(1,1):842	0:759,1:780	chr3L	+	2275315922753150	2277192422771920
chr3L:7796369:7797810:-@chr3L:7774032:7774150:-	ri	0.14	0.13	0.16	0.11	0.1	0.12	0.03	8.21	'chr3L:7796369:7797810:-@chr3L:7774032:7774150:-.A.withRI','chr3L:7796369:7797810:-@chr3L:7774032:7774150:-.B.dn_chr3L:7796369:7797810:-@chr3L:7774032:7774150:-.B.up'	(0,0):83,(0,1):37,(1,0):1232,(1,1):484	0:1294,1:459	(0,0):91,(0,1):26,(1,0):1297,(1,1):695	0:1375,1:643	chr3L	-	77740327774032	77978107797810
chr4:386486:387388:+@chr4:390133:390364:+	ri	0.07	0.06	0.09	0.04	0.03	0.05	0.03	3.39	'chr4:386486:387388:+@chr4:390133:390364:+.A.withRI','chr4:386486:387388:+@chr4:390133:390364:+.B.up_chr4:386486:387388:+@chr4:390133:390364:+.B.dn'	(0,0):38,(0,1):40,(1,0):81,(1,1):324	0:110,1:335	(0,0):38,(0,1):45,(1,0):49,(1,1):379	0:71,1:402	chr4	+	386486386486	390364390364
chr2R:5291212:5291430:-@chr2R:5290161:5290340:-	ri	0.07	0.05	0.1	0.03	0.02	0.04	0.04	8.37	'chr2R:5291212:5291430:-@chr2R:5290161:5290340:-.A.withRI','chr2R:5291212:5291430:-@chr2R:5290161:5290340:-.B.dn_chr2R:5291212:5291430:-@chr2R:5290161:5290340:-.B.up'	(0,0):39,(0,1):67,(1,0):39,(1,1):44	0:42,1:108	(0,0):42,(0,1):119,(1,0):24,(1,1):54	0:28,1:169	chr2R	-	52901615290161	52914305291430
chr3L:18665731:18666438:-@chr3L:18664590:18664772:-	ri	0.08	0.06	0.11	0.04	0.02	0.05	0.04	8.24	'chr3L:18665731:18666438:-@chr3L:18664590:18664772:-.A.withRI','chr3L:18665731:18666438:-@chr3L:18664590:18664772:-.B.dn_chr3L:18665731:18666438:-@chr3L:18664590:18664772:-.B.up'	(0,0):61,(0,1):93,(1,0):45,(1,1):240	0:58,1:320	(0,0):77,(0,1):99,(1,0):23,(1,1):313	0:30,1:405	chr3L	-	1866459018664590	1866643818666430
chr3R:26653561:26654187:+@chr3R:26659364:26659585:+	ri	0.09	0.07	0.12	0.04	0.03	0.06	0.05	28.09	'chr3R:26653561:26654187:+@chr3R:26659364:26659585:+.A.withRI','chr3R:26653561:26654187:+@chr3R:26659364:26659585:+.B.up_chr3R:26653561:26654187:+@chr3R:26659364:26659585:+.B.dn'	(0,0):7,(0,1):10,(1,0):70,(1,1):89	0:78,1:91	(0,0):8,(0,1):12,(1,0):32,(1,1):97	0:38,1:103	chr3R	+	2665356126653560	2665958526659580
chrX:21247147:21247693:+@chrX:21250615:21250736:+	ri	0.09	0.06	0.12	0.04	0.03	0.05	0.05	23.63	'chrX:21247147:21247693:+@chrX:21250615:21250736:+.A.withRI','chrX:21247147:21247693:+@chrX:21250615:21250736:+.B.up_chrX:21247147:21247693:+@chrX:21250615:21250736:+.B.dn'	(0,0):9,(0,1):25,(1,0):61,(1,1):82	0:67,1:101	(0,0):35,(0,1):51,(1,0):46,(1,1):131	0:50,1:178	chrX	+	2124714721247140	2125073621250730
chrX:7839929:7840252:-@chrX:7836542:7837260:-	ri	0.17	0.15	0.19	0.12	0.11	0.13	0.05	17.57	'chrX:7839929:7840252:-@chrX:7836542:7837260:-.A.withRI','chrX:7839929:7840252:-@chrX:7836542:7837260:-.B.dn_chrX:7839929:7840252:-@chrX:7836542:7837260:-.B.up'	(0,0):153,(0,1):127,(1,0):424,(1,1):613	0:529,1:635	(0,0):252,(0,1):235,(1,0):529,(1,1):1019	0:666,1:1117	chrX	-	78365427836542	78402527840252
chr2L:20760525:20760841:+@chr2L:20763497:20765452:+	ri	0.12	0.1	0.14	0.06	0.04	0.07	0.06	4.14671e+06	'chr2L:20760525:20760841:+@chr2L:20763497:20765452:+.A.withRI','chr2L:20760525:20760841:+@chr2L:20763497:20765452:+.B.up_chr2L:20760525:20760841:+@chr2L:20763497:20765452:+.B.dn'	(0,0):59,(0,1):71,(1,0):152,(1,1):827	0:238,1:812	(0,0):30,(0,1):49,(1,0):41,(1,1):497	0:64,1:523	chr2L	+	2076052520760520	2076545220765450
chrX:18758872:18759752:+@chrX:18765667:18765906:+	ri	0.11	0.09	0.14	0.05	0.04	0.06	0.06	6213.55	'chrX:18758872:18759752:+@chrX:18765667:18765906:+.A.withRI','chrX:18758872:18759752:+@chrX:18765667:18765906:+.B.up_chrX:18758872:18759752:+@chrX:18765667:18765906:+.B.dn'	(0,0):33,(0,1):12,(1,0):143,(1,1):188	0:161,1:182	(0,0):32,(0,1):8,(1,0):73,(1,1):228	0:82,1:227	chrX	+	1875887218758870	1876590618765900
chr2L:7234527:7234997:-@chr2L:7231127:7231183:-	ri	0.12	0.1	0.16	0.06	0.05	0.08	0.06	11.47	'chr2L:7234527:7234997:-@chr2L:7231127:7231183:-.A.withRI','chr2L:7234527:7234997:-@chr2L:7231127:7231183:-.B.dn_chr2L:7234527:7234997:-@chr2L:7231127:7231183:-.B.up'	(0,0):34,(0,1):15,(1,0):126,(1,1):83	0:142,1:82	(0,0):42,(0,1):25,(1,0):67,(1,1):81	0:73,1:100	chr2L	-	72311277231127	72349977234997
chr2L:4515397:4518588:-@chr2L:4513647:4513761:-	ri	0.09	0.06	0.12	0.03	0.01	0.05	0.06	5.44	'chr2L:4515397:4518588:-@chr2L:4513647:4513761:-.A.withRI','chr2L:4515397:4518588:-@chr2L:4513647:4513761:-.B.dn_chr2L:4515397:4518588:-@chr2L:4513647:4513761:-.B.up'	(0,0):40,(0,1):5,(1,0):37,(1,1):825	0:123,1:744	(0,0):30,(0,1):2,(1,0):10,(1,1):628	0:37,1:603	chr2L	-	45136474513647	45185884518588
chrX:21247147:21247693:+@chrX:21251000:21251121:+	ri	0.11	0.08	0.14	0.05	0.04	0.07	0.06	3.29	'chrX:21247147:21247693:+@chrX:21251000:21251121:+.A.withRI','chrX:21247147:21247693:+@chrX:21251000:21251121:+.B.up_chrX:21247147:21247693:+@chrX:21251000:21251121:+.B.dn'	(0,0):35,(0,1):7,(1,0):66,(1,1):82	0:72,1:83	(0,0):86,(0,1):7,(1,0):49,(1,1):131	0:50,1:137	chrX	+	2124714721247140	2125112121251120
chr2L:19571572:19571767:-@chr2L:19567899:19569226:-	ri	0.33	0.3	0.38	0.27	0.24	0.29	0.06	3.03	'chr2L:19571572:19571767:-@chr2L:19567899:19569226:-.A.withRI','chr2L:19571572:19571767:-@chr2L:19567899:19569226:-.B.dn_chr2L:19571572:19571767:-@chr2L:19567899:19569226:-.B.up'	(0,0):83,(0,1):34,(1,0):421,(1,1):635	0:654,1:436	(0,0):118,(0,1):53,(1,0):522,(1,1):1001	0:761,1:815	chr2L	-	1956789919567890	1957176719571760
chr3R:1193643:1194027:-@chr3R:1185701:1187482:-	ri	0.18	0.15	0.21	0.11	0.09	0.13	0.07	13.96	'chr3R:1193643:1194027:-@chr3R:1185701:1187482:-.A.withRI','chr3R:1193643:1194027:-@chr3R:1185701:1187482:-.B.dn_chr3R:1193643:1194027:-@chr3R:1185701:1187482:-.B.up'	(0,0):9,(0,1):47,(1,0):203,(1,1):295	0:256,1:289	(0,0):8,(0,1):39,(1,0):134,(1,1):336	0:173,1:336	chr3R	-	11857011185701	11940271194027
chr2R:6624398:6624500:+@chr2R:6624565:6624796:+	ri	0.09	0.05	0.14	0.02	0.01	0.04	0.07	12.87	'chr2R:6624398:6624500:+@chr2R:6624565:6624796:+.A.withRI','chr2R:6624398:6624500:+@chr2R:6624565:6624796:+.B.up_chr2R:6624398:6624500:+@chr2R:6624565:6624796:+.B.dn'	(0,0):60,(0,1):36,(1,0):12,(1,1):139	0:14,1:173	(0,0):117,(0,1):77,(1,0):3,(1,1):160	0:3,1:237	chr2R	+	66243986624398	66247966624796
chr3R:3727106:3727466:-@chr3R:3715231:3715393:-	ri	0.15	0.12	0.18	0.07	0.06	0.08	0.08	2.84233e+09	'chr3R:3727106:3727466:-@chr3R:3715231:3715393:-.A.withRI','chr3R:3727106:3727466:-@chr3R:3715231:3715393:-.B.dn_chr3R:3727106:3727466:-@chr3R:3715231:3715393:-.B.up'	(0,0):67,(0,1):32,(1,0):606,(1,1):77	0:617,1:98	(0,0):64,(0,1):53,(1,0):452,(1,1):123	0:460,1:168	chr3R	-	37152313715231	37274663727466
chr3R:1193579:1194027:-@chr3R:1185701:1187482:-	ri	0.21	0.17	0.25	0.13	0.1	0.15	0.08	68.8	'chr3R:1193579:1194027:-@chr3R:1185701:1187482:-.A.withRI','chr3R:1193579:1194027:-@chr3R:1185701:1187482:-.B.dn_chr3R:1193579:1194027:-@chr3R:1185701:1187482:-.B.up'	(0,0):38,(0,1):18,(1,0):200,(1,1):298	0:266,1:250	(0,0):34,(0,1):13,(1,0):133,(1,1):337	0:176,1:307	chr3R	-	11857011185701	11940271194027
chr3R:16648524:16648581:+@chr3R:16648854:16649080:+	ri	0.42	0.39	0.45	0.34	0.32	0.37	0.08	67.69	'chr3R:16648524:16648581:+@chr3R:16648854:16649080:+.A.withRI','chr3R:16648524:16648581:+@chr3R:16648854:16649080:+.B.up_chr3R:16648524:16648581:+@chr3R:16648854:16649080:+.B.dn'	(0,0):1919,(0,1):198,(1,0):1115,(1,1):468	0:1305,1:476	(0,0):2200,(0,1):219,(1,0):985,(1,1):576	0:1193,1:587	chr3R	+	1664852416648520	1664908016649080
chr2L:5548168:5548709:+@chr2L:5549017:5549076:+	ri	0.17	0.14	0.19	0.09	0.06	0.12	0.08	64.22	'chr2L:5548168:5548709:+@chr2L:5549017:5549076:+.A.withRI','chr2L:5548168:5548709:+@chr2L:5549017:5549076:+.B.up_chr2L:5548168:5548709:+@chr2L:5549017:5549076:+.B.dn'	(0,0):284,(0,1):19,(1,0):197,(1,1):1503	0:483,1:1236	(0,0):126,(0,1):12,(1,0):41,(1,1):582	0:89,1:546	chr2L	+	55481685548168	55490765549076
chr2L:7234527:7234997:-@chr2L:7230889:7231126:-	ri	0.19	0.15	0.24	0.11	0.08	0.14	0.08	10.22	'chr2L:7234527:7234997:-@chr2L:7230889:7231126:-.A.withRI','chr2L:7234527:7234997:-@chr2L:7230889:7231126:-.B.dn_chr2L:7234527:7234997:-@chr2L:7230889:7231126:-.B.up'	(0,0):72,(0,1):13,(1,0):159,(1,1):110	0:173,1:109	(0,0):81,(0,1):14,(1,0):90,(1,1):112	0:100,1:116	chr2L	-	72308897230889	72349977234997
chrX:10771448:10771840:-@chrX:10765562:10766072:-	ri	0.22	0.18	0.26	0.14	0.12	0.17	0.08	9.44	'chrX:10771448:10771840:-@chrX:10765562:10766072:-.A.withRI','chrX:10771448:10771840:-@chrX:10765562:10766072:-.B.dn_chrX:10771448:10771840:-@chrX:10765562:10766072:-.B.up'	(0,0):65,(0,1):38,(1,0):266,(1,1):107	0:285,1:126	(0,0):60,(0,1):57,(1,0):245,(1,1):157	0:266,1:193	chrX	-	1076556210765560	1077184010771840
chr2R:1579157:1579226:-@chr2R:1575181:1575543:-	ri	0.13	0.1	0.15	0.04	0.04	0.05	0.09	1000000000000	'chr2R:1579157:1579226:-@chr2R:1575181:1575543:-.A.withRI','chr2R:1579157:1579226:-@chr2R:1575181:1575543:-.B.dn_chr2R:1579157:1579226:-@chr2R:1575181:1575543:-.B.up'	(0,0):32,(0,1):44,(1,0):232,(1,1):67	0:244,1:99	(0,0):109,(0,1):102,(1,0):218,(1,1):227	0:228,1:319	chr2R	-	15751811575181	15792261579226
chr2L:15067996:15068031:-@chr2L:15066937:15067689:-	ri	0.1	0.06	0.15	0.01	0	0.03	0.09	373.9	'chr2L:15067996:15068031:-@chr2L:15066937:15067689:-.A.withRI','chr2L:15067996:15068031:-@chr2L:15066937:15067689:-.B.dn_chr2L:15067996:15068031:-@chr2L:15066937:15067689:-.B.up'	(0,0):70,(1,0):16,(1,1):333	0:74,1:275	(0,0):71,(0,1):1,(1,0):2,(1,1):448	0:5,1:446	chr2L	-	1506693715066930	1506803115068030
chr2R:9317261:9317287:-@chr2R:9313018:9313744:-	ri	0.21	0.17	0.26	0.12	0.1	0.15	0.09	119.82	'chr2R:9317261:9317287:-@chr2R:9313018:9313744:-.A.withRI','chr2R:9317261:9317287:-@chr2R:9313018:9313744:-.B.dn_chr2R:9317261:9317287:-@chr2R:9313018:9313744:-.B.up'	(0,0):22,(0,1):1,(1,0):199,(1,1):149	0:224,1:125	(0,0):31,(1,0):165,(1,1):221	0:194,1:192	chr2R	-	93130189313018	93172879317287
chr2L:16697501:16697643:+@chr2L:16698139:16698348:+	ri	0.14	0.1	0.18	0.05	0.03	0.08	0.09	19.86	'chr2L:16697501:16697643:+@chr2L:16698139:16698348:+.A.withRI','chr2L:16697501:16697643:+@chr2L:16698139:16698348:+.B.up_chr2L:16697501:16697643:+@chr2L:16698139:16698348:+.B.dn'	(0,0):34,(0,1):69,(1,0):63,(1,1):42	0:67,1:107	(0,0):40,(0,1):67,(1,0):19,(1,1):33	0:23,1:96	chr2L	+	1669750116697500	1669834816698340
chr2L:7234527:7234997:-@chr2L:7231813:7231980:-	ri	0.16	0.11	0.2	0.07	0.05	0.11	0.09	4.67	'chr2L:7234527:7234997:-@chr2L:7231813:7231980:-.A.withRI','chr2L:7234527:7234997:-@chr2L:7231813:7231980:-.B.dn_chr2L:7234527:7234997:-@chr2L:7231813:7231980:-.B.up'	(0,0):34,(0,1):8,(1,0):85,(1,1):87	0:100,1:80	(0,0):55,(0,1):4,(1,0):37,(1,1):85	0:43,1:83	chr2L	-	72318137231813	72349977234997
chr2L:19572500:19572711:-@chr2L:19567899:19569226:-	ri	0.44	0.4	0.5	0.34	0.31	0.37	0.1	33.4	'chr2L:19572500:19572711:-@chr2L:19567899:19569226:-.A.withRI','chr2L:19572500:19572711:-@chr2L:19567899:19569226:-.B.dn_chr2L:19572500:19572711:-@chr2L:19567899:19569226:-.B.up'	(0,0):109,(0,1):1,(1,0):627,(1,1):579	0:881,1:326	(0,0):171,(1,0):780,(1,1):946	0:1103,1:623	chr2L	-	1956789919567890	1957271119572710
chr2R:19705574:19705849:-@chr2R:19702965:19703124:-	ri	0.16	0.11	0.21	0.06	0.04	0.09	0.1	27.43	'chr2R:19705574:19705849:-@chr2R:19702965:19703124:-.A.withRI','chr2R:19705574:19705849:-@chr2R:19702965:19703124:-.B.dn_chr2R:19705574:19705849:-@chr2R:19702965:19703124:-.B.up'	(0,0):14,(0,1):20,(1,0):87,(1,1):30	0:92,1:45	(0,0):7,(0,1):19,(1,0):27,(1,1):25	0:27,1:44	chr2R	-	1970296519702960	1970584919705840
chr2L:15067953:15068031:-@chr2L:15066937:15067689:-	ri	0.12	0.07	0.19	0.02	0	0.04	0.1	26.56	'chr2L:15067953:15068031:-@chr2L:15066937:15067689:-.A.withRI','chr2L:15067953:15068031:-@chr2L:15066937:15067689:-.B.dn_chr2L:15067953:15068031:-@chr2L:15066937:15067689:-.B.up'	(0,0):68,(0,1):2,(1,0):16,(1,1):333	0:74,1:277	(0,0):71,(0,1):1,(1,0):2,(1,1):448	0:10,1:441	chr2L	-	1506693715066930	1506803115068030
chr2R:19958291:19958527:+@chr2R:19960228:19960484:+	ri	0.2	0.14	0.28	0.1	0.07	0.13	0.1	6.15	'chr2R:19958291:19958527:+@chr2R:19960228:19960484:+.A.withRI','chr2R:19958291:19958527:+@chr2R:19960228:19960484:+.B.up_chr2R:19958291:19958527:+@chr2R:19960228:19960484:+.B.dn'	(0,0):57,(0,1):9,(1,0):71,(1,1):50	0:89,1:41	(0,0):92,(0,1):19,(1,0):64,(1,1):92	0:76,1:99	chr2R	+	1995829119958290	1996048419960480
chr2R:7561395:7561680:+@chr2R:7561749:7562289:+	ri	0.14	0.07	0.22	0.04	0.01	0.08	0.1	3.44	'chr2R:7561395:7561680:+@chr2R:7561749:7562289:+.A.withRI','chr2R:7561395:7561680:+@chr2R:7561749:7562289:+.B.up_chr2R:7561395:7561680:+@chr2R:7561749:7562289:+.B.dn'	(0,0):19,(0,1):29,(1,0):9,(1,1):183	0:32,1:189	(0,0):25,(0,1):42,(1,0):2,(1,1):217	0:11,1:250	chr2R	+	75613957561395	75622897562289
chr2L:6669764:6670513:+@chr2L:6674301:6674525:+	ri	0.94	0.92	0.96	0.83	0.79	0.86	0.11	1000000000000	'chr2L:6669764:6670513:+@chr2L:6674301:6674525:+.A.withRI','chr2L:6669764:6670513:+@chr2L:6674301:6674525:+.B.up_chr2L:6669764:6670513:+@chr2L:6674301:6674525:+.B.dn'	(0,0):101,(0,1):29,(1,0):3646,(1,1):138	0:3777,1:36	(0,0):123,(0,1):73,(1,0):3288,(1,1):313	0:3548,1:126	chr2L	+	66697646669764	66745256674525
chr2R:9317132:9317218:-@chr2R:9313018:9313744:-	ri	0.24	0.19	0.29	0.13	0.11	0.16	0.11	63.39	'chr2R:9317132:9317218:-@chr2R:9313018:9313744:-.A.withRI','chr2R:9317132:9317218:-@chr2R:9313018:9313744:-.B.dn_chr2R:9317132:9317218:-@chr2R:9313018:9313744:-.B.up'	(0,0):27,(1,0):193,(1,1):149	0:231,1:111	(0,0):31,(0,1):1,(1,0):160,(1,1):221	0:207,1:175	chr2R	-	93130189313018	93172189317218
chr2L:19572143:19572236:-@chr2L:19567899:19569226:-	ri	0.43	0.38	0.48	0.32	0.29	0.36	0.11	58.48	'chr2L:19572143:19572236:-@chr2L:19567899:19569226:-.A.withRI','chr2L:19572143:19572236:-@chr2L:19567899:19569226:-.B.dn_chr2L:19572143:19572236:-@chr2L:19567899:19569226:-.B.up'	(0,0):109,(1,0):587,(1,1):577	0:841,1:323	(0,0):172,(1,0):722,(1,1):941	0:1052,1:611	chr2L	-	1956789919567890	1957223619572230
chr2L:21220260:21220765:-@chr2L:21213917:21214647:-	ri	0.79	0.74	0.83	0.68	0.63	0.73	0.11	7.81	'chr2L:21220260:21220765:-@chr2L:21213917:21214647:-.A.withRI','chr2L:21220260:21220765:-@chr2L:21213917:21214647:-.B.dn_chr2L:21220260:21220765:-@chr2L:21213917:21214647:-.B.up'	(0,0):24,(0,1):46,(1,0):2270,(1,1):275	0:2482,1:109	(0,0):28,(0,1):62,(1,0):2183,(1,1):366	0:2413,1:198	chr2L	-	2121391721213910	2122076521220760
chr3L:2078963:2079037:-@chr3L:2047846:2051996:-	ri	0.59	0.53	0.65	0.48	0.42	0.53	0.11	3.01	'chr3L:2078963:2079037:-@chr3L:2047846:2051996:-.A.withRI','chr3L:2078963:2079037:-@chr3L:2047846:2051996:-.B.dn_chr3L:2078963:2079037:-@chr3L:2047846:2051996:-.B.up'	(0,0):142,(1,0):1781,(1,1):455	0:2074,1:162	(0,0):108,(1,0):1291,(1,1):409	0:1499,1:201	chr3L	-	20478462047846	20790372079037
chr3L:12196819:12197320:-@chr3L:12194474:12194596:-	ri	0.14	0.1	0.2	0.02	0.01	0.03	0.12	1000000000000	'chr3L:12196819:12197320:-@chr3L:12194474:12194596:-.A.withRI','chr3L:12196819:12197320:-@chr3L:12194474:12194596:-.B.dn_chr3L:12196819:12197320:-@chr3L:12194474:12194596:-.B.up'	(0,0):48,(0,1):18,(1,0):54,(1,1):52	0:60,1:64	(0,0):22,(0,1):21,(1,0):9,(1,1):88	0:12,1:106	chr3L	-	1219447412194470	1219732012197320
chr2R:4043560:4044232:-@chr2R:4034422:4035900:-	ri	0.19	0.16	0.22	0.07	0.06	0.08	0.12	1000000000000	'chr2R:4043560:4044232:-@chr2R:4034422:4035900:-.A.withRI','chr2R:4043560:4044232:-@chr2R:4034422:4035900:-.B.dn_chr2R:4043560:4044232:-@chr2R:4034422:4035900:-.B.up'	(0,0):39,(0,1):14,(1,0):299,(1,1):379	0:371,1:321	(0,0):55,(0,1):29,(1,0):175,(1,1):606	0:220,1:590	chr2R	-	40344224034422	40442324044232
chr3LHet:2190562:2190622:-@chr3LHet:2190190:2190418:-	ri	0.25	0.18	0.34	0.13	0.09	0.17	0.12	8.35	'chr3LHet:2190562:2190622:-@chr3LHet:2190190:2190418:-.A.withRI','chr3LHet:2190562:2190622:-@chr3LHet:2190190:2190418:-.B.dn_chr3LHet:2190562:2190622:-@chr3LHet:2190190:2190418:-.B.up'	(0,0):222,(0,1):21,(1,0):49,(1,1):75	0:64,1:81	(0,0):237,(0,1):24,(1,0):37,(1,1):137	0:49,1:149	chr3LHet	-	21901902190190	21906222190622
chr2R:7789863:7790055:-@chr2R:7786424:7786567:-	ri	0.23	0.16	0.32	0.11	0.08	0.15	0.12	7.63	'chr2R:7789863:7790055:-@chr2R:7786424:7786567:-.A.withRI','chr2R:7789863:7790055:-@chr2R:7786424:7786567:-.B.dn_chr2R:7789863:7790055:-@chr2R:7786424:7786567:-.B.up'	(0,0):22,(0,1):19,(1,0):151,(1,1):3	0:152,1:21	(0,0):58,(0,1):36,(1,0):160,(1,1):20	0:160,1:56	chr2R	-	77864247786424	77900557790055
chr3R:7263496:7263821:+@chr3R:7289749:7291360:+	ri	0.37	0.33	0.41	0.24	0.22	0.27	0.13	2.32859e+11	'chr3R:7263496:7263821:+@chr3R:7289749:7291360:+.A.withRI','chr3R:7263496:7263821:+@chr3R:7289749:7291360:+.B.up_chr3R:7263496:7263821:+@chr3R:7289749:7291360:+.B.dn'	(0,0):963,(0,1):10,(1,0):2154,(1,1):377	0:2290,1:251	(0,0):956,(0,1):10,(1,0):2003,(1,1):542	0:2127,1:428	chr3R	+	72634967263496	72913607291360
chr3L:12196819:12197320:-@chr3L:12194879:12194962:-	ri	0.15	0.1	0.21	0.02	0.01	0.04	0.13	37937.8	'chr3L:12196819:12197320:-@chr3L:12194879:12194962:-.A.withRI','chr3L:12196819:12197320:-@chr3L:12194879:12194962:-.B.dn_chr3L:12196819:12197320:-@chr3L:12194879:12194962:-.B.up'	(0,0):19,(0,1):14,(1,0):50,(1,1):52	0:56,1:60	(0,0):14,(0,1):4,(1,0):9,(1,1):87	0:11,1:89	chr3L	-	1219487912194870	1219732012197320
chr3R:28098:28519:+@chr3R:29504:29884:+	ri	0.27	0.21	0.33	0.14	0.1	0.18	0.13	23.89	'chr3R:28098:28519:+@chr3R:29504:29884:+.A.withRI','chr3R:28098:28519:+@chr3R:29504:29884:+.B.up_chr3R:28098:28519:+@chr3R:29504:29884:+.B.dn'	(0,0):38,(0,1):28,(1,0):92,(1,1):151	0:141,1:130	(0,0):40,(0,1):40,(1,0):50,(1,1):152	0:78,1:164	chr3R	+	2809828098	2988429884
chr3R:4767623:4767792:+@chr3R:4768400:4768670:+	ri	0.76	0.69	0.81	0.63	0.58	0.68	0.13	15.29	'chr3R:4767623:4767792:+@chr3R:4768400:4768670:+.A.withRI','chr3R:4767623:4767792:+@chr3R:4768400:4768670:+.B.up_chr3R:4767623:4767792:+@chr3R:4768400:4768670:+.B.dn'	(0,0):80,(0,1):38,(1,0):552,(1,1):71	0:609,1:52	(0,0):107,(0,1):77,(1,0):634,(1,1):112	0:712,1:111	chr3R	+	47676234767623	47686704768670
chr2R:9281400:9281591:+@chr2R:9281655:9282172:+	ri	0.14	0.06	0.27	0.01	0	0.03	0.13	6.43	'chr2R:9281400:9281591:+@chr2R:9281655:9282172:+.A.withRI','chr2R:9281400:9281591:+@chr2R:9281655:9282172:+.B.up_chr2R:9281400:9281591:+@chr2R:9281655:9282172:+.B.dn'	(0,0):5,(0,1):13,(1,0):3,(1,1):36	0:12,1:40	(0,0):62,(0,1):136,(1,0):3,(1,1):564	0:8,1:695	chr2R	+	92814009281400	92821729282172
chr3R:8234977:8235161:+@chr3R:8235997:8236078:+	ri	0.16	0.07	0.28	0.03	0.01	0.06	0.13	4.66	'chr3R:8234977:8235161:+@chr3R:8235997:8236078:+.A.withRI','chr3R:8234977:8235161:+@chr3R:8235997:8236078:+.B.up_chr3R:8234977:8235161:+@chr3R:8235997:8236078:+.B.dn'	(0,0):28,(0,1):10,(1,0):20,(1,1):1	0:20,1:11	(0,0):24,(0,1):23,(1,0):8,(1,1):6	0:8,1:29	chr3R	+	82349778234977	82360788236078
chr3R:1493415:1493672:-@chr3R:1492820:1493027:-	ri	0.32	0.25	0.4	0.19	0.14	0.25	0.13	4.31	'chr3R:1493415:1493672:-@chr3R:1492820:1493027:-.A.withRI','chr3R:1493415:1493672:-@chr3R:1492820:1493027:-.B.dn_chr3R:1493415:1493672:-@chr3R:1492820:1493027:-.B.up'	(0,0):38,(0,1):41,(1,0):71,(1,1):50	0:89,1:73	(0,0):46,(0,1):58,(1,0):52,(1,1):73	0:71,1:112	chr3R	-	14928201492820	14936721493672
chr3L:16057327:16057417:+@chr3L:16058148:16058534:+	ri	0.14	0.05	0.28	0.01	0	0.05	0.13	3.95	'chr3L:16057327:16057417:+@chr3L:16058148:16058534:+.A.withRI','chr3L:16057327:16057417:+@chr3L:16058148:16058534:+.B.up_chr3L:16057327:16057417:+@chr3L:16058148:16058534:+.B.dn'	(0,0):8,(0,1):3,(1,0):6,(1,1):16	0:9,1:16	(0,0):24,(0,1):4,(1,1):34	0:0,1:38	chr3L	+	1605732716057320	1605853416058530
chrX:11504235:11504446:-@chrX:11502736:11503340:-	ri	0.29	0.21	0.39	0.16	0.11	0.22	0.13	3.18	'chrX:11504235:11504446:-@chrX:11502736:11503340:-.A.withRI','chrX:11504235:11504446:-@chrX:11502736:11503340:-.B.dn_chrX:11504235:11504446:-@chrX:11502736:11503340:-.B.up'	(0,0):61,(0,1):8,(1,0):52,(1,1):108	0:85,1:83	(0,0):81,(0,1):20,(1,0):39,(1,1):134	0:71,1:122	chrX	-	1150273611502730	1150444611504440
chr3LHet:2190564:2190622:-@chr3LHet:2190190:2190418:-	ri	0.28	0.2	0.37	0.15	0.11	0.21	0.13	3.18	'chr3LHet:2190564:2190622:-@chr3LHet:2190190:2190418:-.A.withRI','chr3LHet:2190564:2190622:-@chr3LHet:2190190:2190418:-.B.dn_chr3LHet:2190564:2190622:-@chr3LHet:2190190:2190418:-.B.up'	(0,0):231,(0,1):12,(1,0):49,(1,1):75	0:65,1:71	(0,0):251,(0,1):10,(1,0):39,(1,1):135	0:60,1:124	chr3LHet	-	21901902190190	21906222190622
chr2R:16981261:16981417:+@chr2R:16987720:16988996:+	ri	0.23	0.18	0.3	0.09	0.07	0.1	0.14	3.11408e+09	'chr2R:16981261:16981417:+@chr2R:16987720:16988996:+.A.withRI','chr2R:16981261:16981417:+@chr2R:16987720:16988996:+.B.up_chr2R:16981261:16981417:+@chr2R:16987720:16988996:+.B.dn'	(0,0):15,(0,1):7,(1,0):127,(1,1):98	0:161,1:71	(0,0):51,(0,1):57,(1,0):175,(1,1):333	0:200,1:365	chr2R	+	1698126116981260	1698899616988990
chrX:15796223:15796365:+@chrX:15799807:15800285:+	ri	0.32	0.25	0.4	0.18	0.14	0.22	0.14	63.68	'chrX:15796223:15796365:+@chrX:15799807:15800285:+.A.withRI','chrX:15796223:15796365:+@chrX:15799807:15800285:+.B.up_chrX:15796223:15796365:+@chrX:15799807:15800285:+.B.dn'	(0,0):36,(0,1):23,(1,0):232,(1,1):53	0:248,1:60	(0,0):54,(0,1):40,(1,0):230,(1,1):108	0:252,1:126	chrX	+	1579622315796220	1580028515800280
chr3L:16673912:16674047:-@chr3L:16671908:16672573:-	ri	0.29	0.22	0.35	0.15	0.13	0.18	0.14	60.41	'chr3L:16673912:16674047:-@chr3L:16671908:16672573:-.A.withRI','chr3L:16673912:16674047:-@chr3L:16671908:16672573:-.B.dn_chr3L:16673912:16674047:-@chr3L:16671908:16672573:-.B.up'	(0,0):59,(0,1):16,(1,0):130,(1,1):174	0:186,1:134	(0,0):82,(0,1):67,(1,0):143,(1,1):313	0:188,1:335	chr3L	-	1667190816671900	1667404716674040
chrX:14967374:14967424:-@chrX:14965489:14966681:-	ri	0.22	0.16	0.3	0.08	0.05	0.13	0.14	22.41	'chrX:14967374:14967424:-@chrX:14965489:14966681:-.A.withRI','chrX:14967374:14967424:-@chrX:14965489:14966681:-.B.dn_chrX:14967374:14967424:-@chrX:14965489:14966681:-.B.up'	(0,0):36,(0,1):12,(1,0):40,(1,1):245	0:85,1:212	(0,0):29,(0,1):11,(1,0):18,(1,1):312	0:42,1:299	chrX	-	1496548914965480	1496742414967420
chr2R:9788942:9789077:-@chr2R:9787871:9787954:-	ri	0.23	0.14	0.4	0.09	0.06	0.13	0.14	3.87	'chr2R:9788942:9789077:-@chr2R:9787871:9787954:-.A.withRI','chr2R:9788942:9789077:-@chr2R:9787871:9787954:-.B.dn_chr2R:9788942:9789077:-@chr2R:9787871:9787954:-.B.up'	(0,0):39,(0,1):10,(1,0):67,(1,1):3	0:68,1:12	(0,0):52,(0,1):28,(1,0):56,(1,1):3	0:57,1:30	chr2R	-	97878719787871	97890779789077
chr2R:16506786:16506932:+@chr2R:16506985:16507524:+	ri	0.19	0.09	0.32	0.05	0.01	0.12	0.14	3.85	'chr2R:16506786:16506932:+@chr2R:16506985:16507524:+.A.withRI','chr2R:16506786:16506932:+@chr2R:16506985:16507524:+.B.up_chr2R:16506786:16506932:+@chr2R:16506985:16507524:+.B.dn'	(0,0):22,(0,1):18,(1,0):6,(1,1):80	0:14,1:90	(0,0):40,(0,1):30,(1,0):2,(1,1):158	0:4,1:186	chr2R	+	1650678616506780	1650752416507520
chr2R:4043919:4044232:-@chr2R:4034422:4035900:-	ri	0.26	0.23	0.3	0.11	0.1	0.13	0.15	1000000000000	'chr2R:4043919:4044232:-@chr2R:4034422:4035900:-.A.withRI','chr2R:4043919:4044232:-@chr2R:4034422:4035900:-.B.dn_chr2R:4043919:4044232:-@chr2R:4034422:4035900:-.B.up'	(0,0):52,(0,1):1,(1,0):385,(1,1):293	0:476,1:203	(0,0):84,(1,0):279,(1,1):502	0:343,1:438	chr2R	-	40344224034422	40442324044232
chrX:6448942:6449292:+@chrX:6454408:6455583:+	ri	0.9	0.82	0.96	0.75	0.68	0.83	0.15	4.33	'chrX:6448942:6449292:+@chrX:6454408:6455583:+.A.withRI','chrX:6448942:6449292:+@chrX:6454408:6455583:+.B.up_chrX:6448942:6449292:+@chrX:6454408:6455583:+.B.dn'	(0,0):75,(1,0):1896,(1,1):549	0:2419,1:26	(0,0):85,(1,0):1709,(1,1):595	0:2156,1:148	chrX	+	64489426448942	64555836455583
chr2L:12729252:12729405:+@chr2L:12737959:12738176:+	ri	0.31	0.21	0.45	0.16	0.13	0.21	0.15	3.31	'chr2L:12729252:12729405:+@chr2L:12737959:12738176:+.A.withRI','chr2L:12729252:12729405:+@chr2L:12737959:12738176:+.B.up_chr2L:12729252:12729405:+@chr2L:12737959:12738176:+.B.dn'	(0,0):114,(0,1):1,(1,0):394,(1,1):26	0:400,1:21	(0,0):170,(0,1):6,(1,0):536,(1,1):63	0:547,1:58	chr2L	+	1272925212729250	1273817612738170
chr3L:19812312:19813110:+@chr3L:19821417:19822045:+	ri	0.7	0.62	0.78	0.54	0.48	0.61	0.16	12.25	'chr3L:19812312:19813110:+@chr3L:19821417:19822045:+.A.withRI','chr3L:19812312:19813110:+@chr3L:19821417:19822045:+.B.up_chr3L:19812312:19813110:+@chr3L:19821417:19822045:+.B.dn'	(0,0):24,(0,1):19,(1,0):972,(1,1):132	0:1067,1:56	(0,0):25,(0,1):31,(1,0):933,(1,1):177	0:1018,1:123	chr3L	+	1981231219812310	1982204519822040
chr3L:5749597:5750221:+@chr3L:5750276:5751248:+	ri	0.88	0.8	0.96	0.72	0.62	0.8	0.16	5.95	'chr3L:5749597:5750221:+@chr3L:5750276:5751248:+.A.withRI','chr3L:5749597:5750221:+@chr3L:5750276:5751248:+.B.up_chr3L:5749597:5750221:+@chr3L:5750276:5751248:+.B.dn'	(0,0):66,(0,1):1,(1,0):99,(1,1):929	0:991,1:38	(0,0):103,(0,1):12,(1,0):107,(1,1):1247	0:1081,1:285	chr3L	+	57495975749597	57512485751248
chr2R:6700456:6700885:-@chr2R:6699585:6700401:-	ri	0.2	0.1	0.34	0.04	0	0.12	0.16	3.73	'chr2R:6700456:6700885:-@chr2R:6699585:6700401:-.A.withRI','chr2R:6700456:6700885:-@chr2R:6699585:6700401:-.B.dn_chr2R:6700456:6700885:-@chr2R:6699585:6700401:-.B.up'	(0,0):3,(0,1):24,(1,0):10,(1,1):151	0:45,1:140	(0,0):3,(0,1):23,(1,0):1,(1,1):148	0:6,1:166	chr2R	-	66995856699585	67008856700885
chr3R:20356400:20356636:+@chr3R:20356714:20358323:+	ri	0.19	0.08	0.36	0.03	0	0.08	0.16	3.44	'chr3R:20356400:20356636:+@chr3R:20356714:20358323:+.A.withRI','chr3R:20356400:20356636:+@chr3R:20356714:20358323:+.B.up_chr3R:20356400:20356636:+@chr3R:20356714:20358323:+.B.dn'	(0,0):10,(0,1):10,(1,0):5,(1,1):141	0:42,1:114	(0,0):14,(0,1):18,(1,1):309	0:8,1:319	chr3R	+	2035640020356400	2035832320358320
chr2R:10401658:10401720:+@chr2R:10401788:10401961:+	ri	0.45	0.4	0.52	0.28	0.2	0.37	0.17	13.97	'chr2R:10401658:10401720:+@chr2R:10401788:10401961:+.A.withRI','chr2R:10401658:10401720:+@chr2R:10401788:10401961:+.B.up_chr2R:10401658:10401720:+@chr2R:10401788:10401961:+.B.dn'	(0,0):339,(0,1):76,(1,0):195,(1,1):145	0:262,1:154	(0,0):148,(0,1):32,(1,0):40,(1,1):61	0:53,1:80	chr2R	+	1040165810401650	1040196110401960
chrX:1744653:1746854:+@chrX:1747475:1747660:+	ri	0.8	0.71	0.89	0.63	0.56	0.71	0.17	4.51	'chrX:1744653:1746854:+@chrX:1747475:1747660:+.A.withRI','chrX:1744653:1746854:+@chrX:1747475:1747660:+.B.up_chrX:1744653:1746854:+@chrX:1747475:1747660:+.B.dn'	(0,0):52,(0,1):1,(1,0):246,(1,1):1063	0:1116,1:194	(0,0):81,(0,1):1,(1,0):296,(1,1):1659	0:1402,1:554	chrX	+	17446531744653	17476601747660
chr2RHet:391804:391926:+@chr2RHet:392825:392979:+	ri	0.94	0.85	0.98	0.77	0.67	0.86	0.17	4.39	'chr2RHet:391804:391926:+@chr2RHet:392825:392979:+.A.withRI','chr2RHet:391804:391926:+@chr2RHet:392825:392979:+.B.up_chr2RHet:391804:391926:+@chr2RHet:392825:392979:+.B.dn'	(0,0):68,(0,1):2,(1,0):501,(1,1):6	0:506,1:3	(0,0):77,(0,1):12,(1,0):502,(1,1):7	0:507,1:14	chr2RHet	+	391804391804	392979392979
chrX:6479881:6479983:+@chrX:6480990:6481137:+	ri	0.21	0.09	0.37	0.04	0.02	0.08	0.17	4.21	'chrX:6479881:6479983:+@chrX:6480990:6481137:+.A.withRI','chrX:6479881:6479983:+@chrX:6480990:6481137:+.B.up_chrX:6479881:6479983:+@chrX:6480990:6481137:+.B.dn'	(0,0):37,(0,1):5,(1,0):19,(1,1):1	0:19,1:6	(0,0):50,(0,1):16,(1,0):10,(1,1):2	0:10,1:18	chrX	+	64798816479881	64811376481137
chr2RHet:391976:392685:+@chr2RHet:392825:392979:+	ri	0.45	0.35	0.54	0.28	0.21	0.37	0.17	3.68	'chr2RHet:391976:392685:+@chr2RHet:392825:392979:+.A.withRI','chr2RHet:391976:392685:+@chr2RHet:392825:392979:+.B.up_chr2RHet:391976:392685:+@chr2RHet:392825:392979:+.B.dn'	(0,0):27,(0,1):11,(1,0):62,(1,1):408	0:235,1:246	(0,0):35,(0,1):14,(1,0):42,(1,1):433	0:174,1:315	chr2RHet	+	391976391976	392979392979
chr2R:5997737:5998052:+@chr2R:6000122:6000463:+	ri	0.45	0.33	0.61	0.28	0.22	0.35	0.17	3.24	'chr2R:5997737:5998052:+@chr2R:6000122:6000463:+.A.withRI','chr2R:5997737:5998052:+@chr2R:6000122:6000463:+.B.up_chr2R:5997737:5998052:+@chr2R:6000122:6000463:+.B.dn'	(0,0):67,(0,1):1,(1,0):151,(1,1):76	0:184,1:44	(0,0):101,(0,1):5,(1,0):166,(1,1):125	0:201,1:95	chr2R	+	59977375997737	60004636000463
chr3L:9660802:9660984:-@chr3L:9657177:9657344:-	ri	0.24	0.18	0.32	0.06	0.04	0.09	0.18	146971	'chr3L:9660802:9660984:-@chr3L:9657177:9657344:-.A.withRI','chr3L:9660802:9660984:-@chr3L:9657177:9657344:-.B.dn_chr3L:9660802:9660984:-@chr3L:9657177:9657344:-.B.up'	(0,0):58,(0,1):20,(1,0):215,(1,1):13	0:219,1:29	(0,0):57,(0,1):32,(1,0):58,(1,1):10	0:59,1:41	chr3L	-	96571779657177	96609849660984
chr3L:19812312:19813101:+@chr3L:19821417:19822045:+	ri	0.75	0.67	0.83	0.57	0.5	0.64	0.18	26.51	'chr3L:19812312:19813101:+@chr3L:19821417:19822045:+.A.withRI','chr3L:19812312:19813101:+@chr3L:19821417:19822045:+.B.up_chr3L:19812312:19813101:+@chr3L:19821417:19822045:+.B.dn'	(0,0):30,(0,1):13,(1,0):972,(1,1):132	0:1048,1:69	(0,0):31,(0,1):25,(1,0):933,(1,1):177	0:1046,1:89	chr3L	+	1981231219812310	1982204519822040
chr2L:337016:337198:+@chr2L:337938:338118:+	ri	0.23	0.13	0.39	0.05	0.01	0.1	0.18	16.92	'chr2L:337016:337198:+@chr2L:337938:338118:+.A.withRI','chr2L:337016:337198:+@chr2L:337938:338118:+.B.up_chr2L:337016:337198:+@chr2L:337938:338118:+.B.dn'	(0,0):7,(0,1):6,(1,0):17,(1,1):8	0:18,1:13	(0,0):5,(0,1):12,(1,0):4,(1,1):11	0:5,1:22	chr2L	+	337016337016	338118338118
chr2R:17054235:17054339:-@chr2R:17052157:17052548:-	ri	0.35	0.23	0.51	0.17	0.12	0.24	0.18	3.02	'chr2R:17054235:17054339:-@chr2R:17052157:17052548:-.A.withRI','chr2R:17054235:17054339:-@chr2R:17052157:17052548:-.B.dn_chr2R:17054235:17054339:-@chr2R:17052157:17052548:-.B.up'	(0,0):47,(0,1):1,(1,0):71,(1,1):37	0:91,1:18	(0,0):50,(0,1):7,(1,0):52,(1,1):47	0:61,1:45	chr2R	-	1705215717052150	1705433917054330
chr2L:13386488:13386687:-@chr2L:13386099:13386257:-	ri	0.23	0.12	0.38	0.04	0.01	0.08	0.19	134.67	'chr2L:13386488:13386687:-@chr2L:13386099:13386257:-.A.withRI','chr2L:13386488:13386687:-@chr2L:13386099:13386257:-.B.dn_chr2L:13386488:13386687:-@chr2L:13386099:13386257:-.B.up'	(0,0):25,(0,1):12,(1,0):11,(1,1):10	0:13,1:20	(0,0):43,(0,1):25,(1,0):2,(1,1):21	0:2,1:46	chr2L	-	1338609913386090	1338668713386680
chr2R:4783037:4783149:+@chr2R:4783709:4785135:+	ri	0.4	0.31	0.51	0.21	0.15	0.3	0.19	16.52	'chr2R:4783037:4783149:+@chr2R:4783709:4785135:+.A.withRI','chr2R:4783037:4783149:+@chr2R:4783709:4785135:+.B.up_chr2R:4783037:4783149:+@chr2R:4783709:4785135:+.B.dn'	(0,0):90,(0,1):6,(1,0):63,(1,1):346	0:205,1:210	(0,0):118,(0,1):3,(1,0):39,(1,1):439	0:139,1:342	chr2R	+	47830374783037	47851354785135
chr3R:25857145:25857834:+@chr3R:25858396:25858533:+	ri	0.24	0.13	0.39	0.05	0.01	0.11	0.19	10.19	'chr3R:25857145:25857834:+@chr3R:25858396:25858533:+.A.withRI','chr3R:25857145:25857834:+@chr3R:25858396:25858533:+.B.up_chr3R:25857145:25857834:+@chr3R:25858396:25858533:+.B.dn'	(0,0):12,(0,1):6,(1,0):10,(1,1):35	0:15,1:36	(0,0):17,(0,1):11,(1,0):3,(1,1):60	0:8,1:66	chr3R	+	2585714525857140	2585853325858530
chr3LHet:2190557:2190622:-@chr3LHet:2190190:2190418:-	ri	0.34	0.24	0.46	0.15	0.1	0.21	0.19	8.49	'chr3LHet:2190557:2190622:-@chr3LHet:2190190:2190418:-.A.withRI','chr3LHet:2190557:2190622:-@chr3LHet:2190190:2190418:-.B.dn_chr3LHet:2190557:2190622:-@chr3LHet:2190190:2190418:-.B.up'	(0,0):239,(0,1):4,(1,0):48,(1,1):76	0:58,1:70	(0,0):256,(0,1):5,(1,0):35,(1,1):139	0:54,1:125	chr3LHet	-	21901902190190	21906222190622
chr3L:19287682:19288198:+@chr3L:19289248:19289396:+	ri	0.29	0.17	0.45	0.1	0.05	0.16	0.19	5.43	'chr3L:19287682:19288198:+@chr3L:19289248:19289396:+.A.withRI','chr3L:19287682:19288198:+@chr3L:19289248:19289396:+.B.up_chr3L:19287682:19288198:+@chr3L:19289248:19289396:+.B.dn'	(0,0):11,(0,1):2,(1,0):27,(1,1):40	0:34,1:35	(0,0):16,(0,1):2,(1,0):14,(1,1):66	0:21,1:61	chr3L	+	1928768219287680	1928939619289390
chr3L:10879002:10879273:-@chr3L:10877834:10878890:-	ri	0.22	0.08	0.42	0.03	0	0.09	0.19	3.7	'chr3L:10879002:10879273:-@chr3L:10877834:10878890:-.A.withRI','chr3L:10879002:10879273:-@chr3L:10877834:10878890:-.B.dn_chr3L:10879002:10879273:-@chr3L:10877834:10878890:-.B.up'	(0,0):6,(0,1):8,(1,0):4,(1,1):99	0:27,1:84	(0,0):12,(0,1):11,(1,1):223	0:8,1:226	chr3L	-	1087783410877830	1087927310879270
chr3R:7472510:7472751:-@chr3R:7467998:7468916:-	ri	0.65	0.53	0.78	0.46	0.38	0.54	0.19	3.04	'chr3R:7472510:7472751:-@chr3R:7467998:7468916:-.A.withRI','chr3R:7472510:7472751:-@chr3R:7467998:7468916:-.B.dn_chr3R:7472510:7472751:-@chr3R:7467998:7468916:-.B.up'	(0,0):34,(0,1):5,(1,0):265,(1,1):93	0:330,1:33	(0,0):46,(0,1):6,(1,0):283,(1,1):155	0:354,1:90	chr3R	-	74679987467998	74727517472751
chr2L:2856377:2856572:+@chr2L:2856631:2856672:+	ri	0.97	0.92	1	0.77	0.69	0.85	0.2	7.84	'chr2L:2856377:2856572:+@chr2L:2856631:2856672:+.A.withRI','chr2L:2856377:2856572:+@chr2L:2856631:2856672:+.B.up_chr2L:2856377:2856572:+@chr2L:2856631:2856672:+.B.dn'	(0,0):947,(1,0):828,(1,1):1132	0:1953,1:7	(0,0):1122,(1,0):673,(1,1):1261	0:1588,1:346	chr2L	+	28563772856377	28566722856672
chr3R:2204128:2205676:-@chr3R:2203752:2203901:-	ri	0.99	0.95	1	0.79	0.62	0.94	0.2	4.6	'chr3R:2204128:2205676:-@chr3R:2203752:2203901:-.A.withRI','chr3R:2204128:2205676:-@chr3R:2203752:2203901:-.B.dn_chr3R:2204128:2205676:-@chr3R:2203752:2203901:-.B.up'	(0,0):209,(1,0):137,(1,1):189	0:324,1:2	(0,0):67,(0,1):3,(1,0):32,(1,1):153	0:138,1:50	chr3R	-	22037522203752	22056762205676
chr3R:12122897:12123067:+@chr3R:12123179:12123682:+	ri	0.29	0.16	0.42	0.09	0.05	0.15	0.2	3.89	'chr3R:12122897:12123067:+@chr3R:12123179:12123682:+.A.withRI','chr3R:12122897:12123067:+@chr3R:12123179:12123682:+.B.up_chr3R:12122897:12123067:+@chr3R:12123179:12123682:+.B.dn'	(0,0):134,(0,1):13,(1,0):12,(1,1):88	0:36,1:77	(0,0):177,(0,1):40,(1,0):9,(1,1):221	0:45,1:225	chr3R	+	1212289712122890	1212368212123680
chr2R:14523648:14523776:-@chr2R:14520931:14521790:-	ri	0.49	0.36	0.7	0.29	0.21	0.38	0.2	3.69	'chr2R:14523648:14523776:-@chr2R:14520931:14521790:-.A.withRI','chr2R:14523648:14523776:-@chr2R:14520931:14521790:-.B.dn_chr2R:14523648:14523776:-@chr2R:14520931:14521790:-.B.up'	(0,0):81,(0,1):1,(1,0):87,(1,1):77	0:129,1:36	(0,0):81,(0,1):2,(1,0):65,(1,1):95	0:95,1:67	chr2R	-	1452093114520930	1452377614523770
chr3R:15725336:15725530:-@chr3R:15724875:15725049:-	ri	0.98	0.94	1	0.77	0.7	0.85	0.21	115365	'chr3R:15725336:15725530:-@chr3R:15724875:15725049:-.A.withRI','chr3R:15725336:15725530:-@chr3R:15724875:15725049:-.B.dn_chr3R:15725336:15725530:-@chr3R:15724875:15725049:-.B.up'	(0,0):45,(0,1):1,(1,0):281,(1,1):48	0:328,1:2	(0,0):66,(0,1):20,(1,0):283,(1,1):78	0:342,1:39	chr3R	-	1572487515724870	1572553015725530
chr2R:4036532:4036673:-@chr2R:4034422:4035900:-	ri	0.3	0.2	0.42	0.09	0.06	0.14	0.21	9236.45	'chr2R:4036532:4036673:-@chr2R:4034422:4035900:-.A.withRI','chr2R:4036532:4036673:-@chr2R:4034422:4035900:-.B.dn_chr2R:4036532:4036673:-@chr2R:4034422:4035900:-.B.up'	(0,0):22,(1,0):36,(1,1):283	0:92,1:227	(0,0):46,(1,0):19,(1,1):503	0:63,1:459	chr2R	-	40344224034422	40366734036673
chr3R:7472438:7472751:-@chr3R:7467998:7468927:-	ri	0.63	0.52	0.76	0.42	0.36	0.5	0.21	10.31	'chr3R:7472438:7472751:-@chr3R:7467998:7468927:-.A.withRI','chr3R:7472438:7472751:-@chr3R:7467998:7468927:-.B.dn_chr3R:7472438:7472751:-@chr3R:7467998:7468927:-.B.up'	(0,0):32,(0,1):7,(1,0):258,(1,1):100	0:326,1:39	(0,0):40,(0,1):12,(1,0):272,(1,1):166	0:351,1:99	chr3R	-	74679987467998	74727517472751
chr2L:11262617:11262751:-@chr2L:11262486:11262560:-	ri	0.24	0.09	0.5	0.03	0	0.12	0.21	3.35	'chr2L:11262617:11262751:-@chr2L:11262486:11262560:-.A.withRI','chr2L:11262617:11262751:-@chr2L:11262486:11262560:-.B.dn_chr2L:11262617:11262751:-@chr2L:11262486:11262560:-.B.up'	(0,0):21,(0,1):5,(1,0):3,(1,1):4	0:5,1:7	(0,0):54,(0,1):10,(1,1):12	0:0,1:22	chr2L	-	1126248611262480	1126275111262750
chrX:166455:166916:-@chrX:165521:165646:-	ri	0.45	0.32	0.61	0.24	0.15	0.35	0.21	3.11	'chrX:166455:166916:-@chrX:165521:165646:-.A.withRI','chrX:166455:166916:-@chrX:165521:165646:-.B.dn_chrX:166455:166916:-@chrX:165521:165646:-.B.up'	(0,0):16,(0,1):9,(1,0):44,(1,1):24	0:59,1:18	(0,0):16,(0,1):13,(1,0):27,(1,1):35	0:33,1:42	chrX	-	165521165521	166916166916
chr3R:9543834:9543961:-@chr3R:9543055:9543770:-	ri	0.25	0.12	0.41	0.03	0.01	0.06	0.22	638.12	'chr3R:9543834:9543961:-@chr3R:9543055:9543770:-.A.withRI','chr3R:9543834:9543961:-@chr3R:9543055:9543770:-.B.dn_chr3R:9543834:9543961:-@chr3R:9543055:9543770:-.B.up'	(0,0):4,(0,1):20,(1,0):9,(1,1):106	0:27,1:108	(0,0):1,(0,1):46,(1,0):2,(1,1):305	0:9,1:344	chr3R	-	95430559543055	95439619543961
chr3R:5181236:5181425:+@chr3R:5182146:5182392:+	ri	0.63	0.49	0.79	0.41	0.34	0.48	0.22	10.35	'chr3R:5181236:5181425:+@chr3R:5182146:5182392:+.A.withRI','chr3R:5181236:5181425:+@chr3R:5182146:5182392:+.B.up_chr3R:5181236:5181425:+@chr3R:5182146:5182392:+.B.dn'	(0,0):61,(0,1):8,(1,0):136,(1,1):42	0:157,1:29	(0,0):130,(0,1):41,(1,0):206,(1,1):79	0:240,1:86	chr3R	+	51812365181236	51823925182392
chrX:7995102:7995791:-@chrX:7993384:7993646:-	ri	0.28	0.14	0.51	0.06	0.02	0.14	0.22	3.2	'chrX:7995102:7995791:-@chrX:7993384:7993646:-.A.withRI','chrX:7995102:7995791:-@chrX:7993384:7993646:-.B.dn_chrX:7995102:7995791:-@chrX:7993384:7993646:-.B.up'	(0,0):5,(0,1):2,(1,0):11,(1,1):19	0:21,1:11	(0,0):5,(0,1):4,(1,0):4,(1,1):32	0:4,1:36	chrX	-	79933847993384	79957917995791
chr2R:4036433:4036694:-@chr2R:4034422:4035900:-	ri	0.34	0.23	0.46	0.11	0.06	0.17	0.23	312.49	'chr2R:4036433:4036694:-@chr2R:4034422:4035900:-.A.withRI','chr2R:4036433:4036694:-@chr2R:4034422:4035900:-.B.dn_chr2R:4036433:4036694:-@chr2R:4034422:4035900:-.B.up'	(0,0):19,(0,1):1,(1,0):33,(1,1):288	0:117,1:205	(0,0):45,(0,1):1,(1,0):18,(1,1):504	0:64,1:459	chr2R	-	40344224034422	40366944036694
chr2R:13640041:13640149:+@chr2R:13640212:13640382:+	ri	0.25	0.1	0.48	0.02	0	0.06	0.23	32.68	'chr2R:13640041:13640149:+@chr2R:13640212:13640382:+.A.withRI','chr2R:13640041:13640149:+@chr2R:13640212:13640382:+.B.up_chr2R:13640041:13640149:+@chr2R:13640212:13640382:+.B.dn'	(0,0):31,(0,1):7,(1,0):4,(1,1):9	0:5,1:15	(0,0):34,(0,1):25,(1,1):34	0:0,1:59	chr2R	+	1364004113640040	1364038213640380
chrX:19533178:19533426:+@chrX:19533488:19533853:+	ri	0.28	0.14	0.46	0.05	0.01	0.13	0.23	17.33	'chrX:19533178:19533426:+@chrX:19533488:19533853:+.A.withRI','chrX:19533178:19533426:+@chrX:19533488:19533853:+.B.up_chrX:19533178:19533426:+@chrX:19533488:19533853:+.B.dn'	(0,0):43,(0,1):1,(1,0):7,(1,1):103	0:26,1:85	(0,0):68,(0,1):3,(1,0):1,(1,1):132	0:7,1:129	chrX	+	1953317819533170	1953385319533850
chr2L:17437419:17438017:-@chr2L:17436830:17437323:-	ri	0.36	0.23	0.52	0.13	0.07	0.2	0.23	15.89	'chr2L:17437419:17438017:-@chr2L:17436830:17437323:-.A.withRI','chr2L:17437419:17438017:-@chr2L:17436830:17437323:-.B.dn_chr2L:17437419:17438017:-@chr2L:17436830:17437323:-.B.up'	(0,0):5,(0,1):9,(1,0):15,(1,1):148	0:51,1:121	(0,0):20,(0,1):41,(1,0):13,(1,1):329	0:29,1:354	chr2L	-	1743683017436830	1743801717438010
chr2L:8661359:8661487:+@chr2L:8662439:8662646:+	ri	0.32	0.14	0.61	0.09	0.04	0.17	0.23	3.69	'chr2L:8661359:8661487:+@chr2L:8662439:8662646:+.A.withRI','chr2L:8661359:8661487:+@chr2L:8662439:8662646:+.B.up_chr2L:8661359:8661487:+@chr2L:8662439:8662646:+.B.dn'	(0,0):4,(0,1):4,(1,0):12,(1,1):1	0:12,1:5	(0,0):14,(0,1):11,(1,0):8,(1,1):3	0:8,1:14	chr2L	+	86613598661359	86626468662646
chrX:16329178:16330537:+@chrX:16330621:16330698:+	ri	0.86	0.73	0.95	0.63	0.5	0.78	0.23	3.66	'chrX:16329178:16330537:+@chrX:16330621:16330698:+.A.withRI','chrX:16329178:16330537:+@chrX:16330621:16330698:+.B.up_chrX:16329178:16330537:+@chrX:16330621:16330698:+.B.dn'	(0,0):46,(0,1):3,(1,0):56,(1,1):488	0:448,1:99	(0,0):35,(0,1):8,(1,0):40,(1,1):509	0:339,1:218	chrX	+	1632917816329170	1633069816330690
chr2R:10504933:10505250:-@chr2R:10504551:10504865:-	ri	0.27	0.11	0.48	0.04	0	0.12	0.23	3.51	'chr2R:10504933:10505250:-@chr2R:10504551:10504865:-.A.withRI','chr2R:10504933:10505250:-@chr2R:10504551:10504865:-.B.dn_chr2R:10504933:10505250:-@chr2R:10504551:10504865:-.B.up'	(0,0):14,(0,1):6,(1,0):5,(1,1):56	0:20,1:47	(0,0):29,(0,1):9,(1,1):63	0:7,1:65	chr2R	-	1050455110504550	1050525010505250
chr2L:7024150:7024152:-@chr2L:7019135:7019382:-	ri	0.28	0.24	0.33	0.04	0.03	0.04	0.24	1000000000000	'chr2L:7024150:7024152:-@chr2L:7019135:7019382:-.A.withRI','chr2L:7024150:7024152:-@chr2L:7019135:7019382:-.B.dn_chr2L:7024150:7024152:-@chr2L:7019135:7019382:-.B.up'	(0,0):834,(1,0):3118,(1,1):160	0:3152,1:126	(0,0):400,(1,0):824,(1,1):314	0:841,1:297	chr2L	-	70191357019135	70241527024152
chr2R:9781635:9782097:-@chr2R:9769906:9770052:-	ri	0.87	0.78	0.94	0.63	0.54	0.73	0.24	58.32	'chr2R:9781635:9782097:-@chr2R:9769906:9770052:-.A.withRI','chr2R:9781635:9782097:-@chr2R:9769906:9770052:-.B.dn_chr2R:9781635:9782097:-@chr2R:9769906:9770052:-.B.up'	(0,0):114,(0,1):4,(1,0):2437,(1,1):64	0:2490,1:15	(0,0):106,(0,1):16,(1,0):2194,(1,1):80	0:2249,1:41	chr2R	-	97699069769906	97820979782097
chr3R:2269544:2270032:+@chr3R:2271257:2271735:+	ri	0.34	0.2	0.51	0.1	0.05	0.16	0.24	54.17	'chr3R:2269544:2270032:+@chr3R:2271257:2271735:+.A.withRI','chr3R:2269544:2270032:+@chr3R:2271257:2271735:+.B.up_chr3R:2269544:2270032:+@chr3R:2271257:2271735:+.B.dn'	(0,0):7,(0,1):7,(1,0):29,(1,1):40	0:34,1:42	(0,0):15,(0,1):12,(1,0):13,(1,1):72	0:21,1:76	chr3R	+	22695442269544	22717352271735
chr2L:2882920:2883124:-@chr2L:2882692:2882833:-	ri	0.32	0.18	0.49	0.08	0.03	0.14	0.24	43.74	'chr2L:2882920:2883124:-@chr2L:2882692:2882833:-.A.withRI','chr2L:2882920:2883124:-@chr2L:2882692:2882833:-.B.dn_chr2L:2882920:2883124:-@chr2L:2882692:2882833:-.B.up'	(0,0):33,(0,1):8,(1,0):11,(1,1):14	0:13,1:20	(0,0):30,(0,1):26,(1,0):4,(1,1):31	0:10,1:51	chr2L	-	28826922882692	28831242883124
chr3R:8847142:8847364:+@chr3R:8851111:8851179:+	ri	0.82	0.7	0.93	0.58	0.49	0.67	0.24	26.53	'chr3R:8847142:8847364:+@chr3R:8851111:8851179:+.A.withRI','chr3R:8847142:8847364:+@chr3R:8851111:8851179:+.B.up_chr3R:8847142:8847364:+@chr3R:8851111:8851179:+.B.dn'	(0,0):141,(0,1):7,(1,0):1691,(1,1):12	0:1703,1:7	(0,0):165,(0,1):25,(1,0):1756,(1,1):22	0:1770,1:33	chr3R	+	88471428847142	88511798851179
chr2L:22250545:22250853:+@chr2L:22253746:22253921:+	ri	0.48	0.33	0.68	0.24	0.19	0.3	0.24	11.86	'chr2L:22250545:22250853:+@chr2L:22253746:22253921:+.A.withRI','chr2L:22250545:22250853:+@chr2L:22253746:22253921:+.B.up_chr2L:22250545:22250853:+@chr2L:22253746:22253921:+.B.dn'	(0,0):111,(1,0):156,(1,1):33	0:168,1:21	(0,0):141,(0,1):1,(1,0):215,(1,1):89	0:246,1:59	chr2L	+	2225054522250540	2225392122253920
chr2L:22105386:22105488:-@chr2L:22105116:22105297:-	ri	0.84	0.67	0.97	0.6	0.51	0.69	0.24	5.02	'chr2L:22105386:22105488:-@chr2L:22105116:22105297:-.A.withRI','chr2L:22105386:22105488:-@chr2L:22105116:22105297:-.B.dn_chr2L:22105386:22105488:-@chr2L:22105116:22105297:-.B.up'	(0,0):162,(0,1):1,(1,0):61,(1,1):39	0:97,1:4	(0,0):405,(1,0):151,(1,1):153	0:234,1:70	chr2L	-	2210511622105110	2210548822105480
chr4:158017:158243:+@chr4:158341:158378:+	ri	0.44	0.3	0.64	0.2	0.11	0.33	0.24	3.71	'chr4:158017:158243:+@chr4:158341:158378:+.A.withRI','chr4:158017:158243:+@chr4:158341:158378:+.B.up_chr4:158017:158243:+@chr4:158341:158378:+.B.dn'	(0,0):66,(1,0):36,(1,1):74	0:67,1:43	(0,0):84,(1,0):17,(1,1):83	0:31,1:69	chr4	+	158017158017	158378158378
chr4:263114:263305:+@chr4:263802:264211:+	ri	0.37	0.21	0.56	0.13	0.06	0.25	0.24	3.69	'chr4:263114:263305:+@chr4:263802:264211:+.A.withRI','chr4:263114:263305:+@chr4:263802:264211:+.B.up_chr4:263114:263305:+@chr4:263802:264211:+.B.dn'	(0,0):21,(0,1):1,(1,0):18,(1,1):37	0:29,1:27	(0,0):32,(0,1):2,(1,0):6,(1,1):38	0:11,1:35	chr4	+	263114263114	264211264211
chr3R:25857145:25857834:+@chr3R:25858653:25858749:+	ri	0.37	0.2	0.6	0.12	0.05	0.2	0.25	6.49	'chr3R:25857145:25857834:+@chr3R:25858653:25858749:+.A.withRI','chr3R:25857145:25857834:+@chr3R:25858653:25858749:+.B.up_chr3R:25857145:25857834:+@chr3R:25858653:25858749:+.B.dn'	(0,0):26,(0,1):1,(1,0):18,(1,1):35	0:37,1:17	(0,0):40,(1,0):8,(1,1):60	0:15,1:53	chr3R	+	2585714525857140	2585874925858740
chr3R:5375310:5375532:-@chr3R:5372520:5373092:-	ri	0.85	0.71	0.98	0.6	0.5	0.74	0.25	4.61	'chr3R:5375310:5375532:-@chr3R:5372520:5373092:-.A.withRI','chr3R:5375310:5375532:-@chr3R:5372520:5373092:-.B.dn_chr3R:5375310:5375532:-@chr3R:5372520:5373092:-.B.up'	(0,0):64,(1,0):312,(1,1):96	0:406,1:2	(0,0):68,(1,0):287,(1,1):130	0:370,1:47	chr3R	-	53725205372520	53755325375532
chr3L:17549243:17549380:-@chr3L:17548035:17548630:-	ri	0.46	0.29	0.71	0.21	0.11	0.34	0.25	4.15	'chr3L:17549243:17549380:-@chr3L:17548035:17548630:-.A.withRI','chr3L:17549243:17549380:-@chr3L:17548035:17548630:-.B.dn_chr3L:17549243:17549380:-@chr3L:17548035:17548630:-.B.up'	(0,0):11,(1,0):26,(1,1):53	0:51,1:28	(0,0):27,(1,0):15,(1,1):69	0:29,1:55	chr3L	-	1754803517548030	1754938017549380
chr3L:16785541:16785686:-@chr3L:16784681:16784790:-	ri	0.43	0.23	0.69	0.18	0.1	0.28	0.25	3.71	'chr3L:16785541:16785686:-@chr3L:16784681:16784790:-.A.withRI','chr3L:16785541:16785686:-@chr3L:16784681:16784790:-.B.dn_chr3L:16785541:16785686:-@chr3L:16784681:16784790:-.B.up'	(0,0):8,(0,1):4,(1,0):28	0:28,1:4	(0,0):14,(0,1):14,(1,0):33,(1,1):2	0:33,1:16	chr3L	-	1678468116784680	1678568616785680
chr2R:19441778:19442241:-@chr2R:19437471:19438559:-	ri	0.69	0.6	0.77	0.43	0.37	0.51	0.26	102634	'chr2R:19441778:19442241:-@chr2R:19437471:19438559:-.A.withRI','chr2R:19441778:19442241:-@chr2R:19437471:19438559:-.B.dn_chr2R:19441778:19442241:-@chr2R:19437471:19438559:-.B.up'	(0,0):69,(0,1):17,(1,0):351,(1,1):137	0:434,1:71	(0,0):63,(0,1):30,(1,0):262,(1,1):180	0:350,1:122	chr2R	-	1943747119437470	1944224119442240
chrX:10359176:10359280:-@chrX:10357883:10359088:-	ri	0.46	0.3	0.65	0.2	0.1	0.35	0.26	5.55	'chrX:10359176:10359280:-@chrX:10357883:10359088:-.A.withRI','chrX:10359176:10359280:-@chrX:10357883:10359088:-.B.dn_chrX:10359176:10359280:-@chrX:10357883:10359088:-.B.up'	(0,0):29,(1,0):16,(1,1):406	0:227,1:195	(0,0):41,(0,1):1,(1,0):9,(1,1):439	0:81,1:368	chrX	-	1035788310357880	1035928010359280
chr3L:19634165:19634318:-@chr3L:19633728:19634084:-	ri	0.34	0.15	0.61	0.08	0.02	0.18	0.26	4.3	'chr3L:19634165:19634318:-@chr3L:19633728:19634084:-.A.withRI','chr3L:19634165:19634318:-@chr3L:19633728:19634084:-.B.dn_chr3L:19634165:19634318:-@chr3L:19633728:19634084:-.B.up'	(0,0):10,(0,1):6,(1,0):6,(1,1):23	0:14,1:21	(0,0):15,(0,1):20,(1,0):3,(1,1):52	0:5,1:70	chr3L	-	1963372819633720	1963431819634310
chr3L:9404917:9405082:+@chr3L:9405255:9406417:+	ri	0.55	0.38	0.72	0.28	0.17	0.39	0.27	10.04	'chr3L:9404917:9405082:+@chr3L:9405255:9406417:+.A.withRI','chr3L:9404917:9405082:+@chr3L:9405255:9406417:+.B.up_chr3L:9404917:9405082:+@chr3L:9405255:9406417:+.B.dn'	(0,0):57,(0,1):7,(1,0):24,(1,1):147	0:100,1:78	(0,0):37,(0,1):20,(1,0):17,(1,1):168	0:70,1:135	chr3L	+	94049179404917	94064179406417
chrX:7995120:7995791:-@chrX:7993384:7993646:-	ri	0.34	0.16	0.6	0.07	0.02	0.14	0.27	6.28	'chrX:7995120:7995791:-@chrX:7993384:7993646:-.A.withRI','chrX:7995120:7995791:-@chrX:7993384:7993646:-.B.dn_chrX:7995120:7995791:-@chrX:7993384:7993646:-.B.up'	(0,0):5,(0,1):2,(1,0):12,(1,1):18	0:17,1:15	(0,0):7,(0,1):2,(1,0):4,(1,1):32	0:7,1:31	chrX	-	79933847993384	79957917995791
chr2R:19958291:19958527:+@chr2R:19959514:19959747:+	ri	0.46	0.27	0.7	0.19	0.11	0.29	0.27	4.91	'chr2R:19958291:19958527:+@chr2R:19959514:19959747:+.A.withRI','chr2R:19958291:19958527:+@chr2R:19959514:19959747:+.B.up_chr2R:19958291:19958527:+@chr2R:19959514:19959747:+.B.dn'	(0,0):23,(1,0):42,(1,1):27	0:53,1:16	(0,0):42,(0,1):1,(1,0):27,(1,1):43	0:40,1:31	chr2R	+	1995829119958290	1995974719959740
chr3R:21601345:21601757:-@chr3R:21601010:21601236:-	ri	0.94	0.83	1	0.67	0.49	0.87	0.27	4.57	'chr3R:21601345:21601757:-@chr3R:21601010:21601236:-.A.withRI','chr3R:21601345:21601757:-@chr3R:21601010:21601236:-.B.dn_chr3R:21601345:21601757:-@chr3R:21601010:21601236:-.B.up'	(0,0):4,(1,0):12,(1,1):7	0.0131944	(0,0):4,(0,1):4,(1,0):19,(1,1):39	0:42,1:20	chr3R	-	2160101021601010	2160175721601750
chrX:10742723:10744008:+@chrX:10744067:10745006:+	ri	0.33	0.1	0.6	0.06	0	0.16	0.27	3.4	'chrX:10742723:10744008:+@chrX:10744067:10745006:+.A.withRI','chrX:10742723:10744008:+@chrX:10744067:10745006:+.B.up_chrX:10742723:10744008:+@chrX:10744067:10745006:+.B.dn'	(0,0):8,(0,1):5,(1,0):3,(1,1):154	0:58,1:104	(0,0):14,(0,1):17,(1,0):1,(1,1):213	0:8,1:223	chrX	+	1074272310742720	1074500610745000
chr3R:5375381:5375532:-@chr3R:5372520:5373092:-	ri	0.87	0.69	0.99	0.59	0.47	0.73	0.28	5.37	'chr3R:5375381:5375532:-@chr3R:5372520:5373092:-.A.withRI','chr3R:5375381:5375532:-@chr3R:5372520:5373092:-.B.dn_chr3R:5375381:5375532:-@chr3R:5372520:5373092:-.B.up'	(0,0):64,(1,0):322,(1,1):86	0:399,1:9	(0,0):68,(1,0):296,(1,1):121	0:356,1:61	chr3R	-	53725205372520	53755325375532
chr3L:22281691:22281840:+@chr3L:22281895:22282039:+	ri	0.9	0.74	0.98	0.62	0.44	0.78	0.28	3.71	'chr3L:22281691:22281840:+@chr3L:22281895:22282039:+.A.withRI','chr3L:22281691:22281840:+@chr3L:22281895:22282039:+.B.up_chr3L:22281691:22281840:+@chr3L:22281895:22282039:+.B.dn'	(0,0):6,(1,0):21,(1,1):11	0:31,1:1	(0,0):13,(0,1):6,(1,0):20,(1,1):9	0:27,1:8	chr3L	+	2228169122281690	2228203922282030
chr2R:19557425:19557900:+@chr2R:19559499:19559611:+	ri	0.49	0.3	0.72	0.21	0.12	0.35	0.28	3.31	'chr2R:19557425:19557900:+@chr2R:19559499:19559611:+.A.withRI','chr2R:19557425:19557900:+@chr2R:19559499:19559611:+.B.up_chr2R:19557425:19557900:+@chr2R:19559499:19559611:+.B.dn'	(0,0):10,(0,1):3,(1,0):42,(1,1):15	0:49,1:11	(0,0):8,(0,1):4,(1,0):23,(1,1):24	0:25,1:26	chr2R	+	1955742519557420	1955961119559610
chr2R:5997737:5998052:+@chr2R:5998979:5999080:+	ri	0.66	0.52	0.79	0.37	0.29	0.46	0.29	32.56	'chr2R:5997737:5998052:+@chr2R:5998979:5999080:+.A.withRI','chr2R:5997737:5998052:+@chr2R:5998979:5999080:+.B.up_chr2R:5997737:5998052:+@chr2R:5998979:5999080:+.B.dn'	(0,0):20,(0,1):9,(1,0):127,(1,1):15	0:139,1:12	(0,0):32,(0,1):18,(1,0):138,(1,1):57	0:158,1:55	chr2R	+	59977375997737	59990805999080
chrX:16564090:16564168:-@chrX:16563346:16563475:-	ri	0.34	0.15	0.67	0.05	0.02	0.11	0.29	12.29	'chrX:16564090:16564168:-@chrX:16563346:16563475:-.A.withRI','chrX:16564090:16564168:-@chrX:16563346:16563475:-.B.dn_chrX:16564090:16564168:-@chrX:16563346:16563475:-.B.up'	(0,0):25,(0,1):3,(1,0):22,(1,1):2	0:22,1:5	(0,0):9,(0,1):7,(1,0):6,(1,1):3	0:6,1:10	chrX	-	1656334616563340	1656416816564160
chrX:18377691:18377786:-@chrX:18376588:18376676:-	ri	0.92	0.72	1	0.63	0.4	0.86	0.29	4.12	'chrX:18377691:18377786:-@chrX:18376588:18376676:-.A.withRI','chrX:18377691:18377786:-@chrX:18376588:18376676:-.B.dn_chrX:18377691:18377786:-@chrX:18376588:18376676:-.B.up'	(0,0):129,(1,0):256	0.177778	(0,0):73,(0,1):3,(1,0):166	0:166,1:3	chrX	-	1837658818376580	1837778618377780
chr2R:11974436:11975230:-@chr2R:11973732:11973798:-	ri	0.48	0.32	0.68	0.18	0.1	0.29	0.3	15.6	'chr2R:11974436:11975230:-@chr2R:11973732:11973798:-.A.withRI','chr2R:11974436:11975230:-@chr2R:11973732:11973798:-.B.dn_chr2R:11974436:11975230:-@chr2R:11973732:11973798:-.B.up'	(0,0):22,(0,1):3,(1,0):28,(1,1):54	0:51,1:34	(0,0):31,(0,1):2,(1,0):16,(1,1):92	0:25,1:85	chr2R	-	1197373211973730	1197523011975230
chr2L:3294584:3294685:-@chr2L:3293323:3293949:-	ri	0.83	0.65	0.97	0.53	0.37	0.7	0.3	4.11	'chr2L:3294584:3294685:-@chr2L:3293323:3293949:-.A.withRI','chr2L:3294584:3294685:-@chr2L:3293323:3293949:-.B.dn_chr2L:3294584:3294685:-@chr2L:3293323:3293949:-.B.up'	(0,0):19,(0,1):1,(1,0):93,(1,1):80	0:155,1:19	(0,0):14,(0,1):2,(1,0):49,(1,1):72	0:94,1:29	chr2L	-	32933233293323	32946853294685
chr2R:4844534:4844661:+@chr2R:4846612:4846839:+	ri	0.5	0.33	0.7	0.19	0.12	0.28	0.31	63.37	'chr2R:4844534:4844661:+@chr2R:4846612:4846839:+.A.withRI','chr2R:4844534:4844661:+@chr2R:4846612:4846839:+.B.up_chr2R:4844534:4844661:+@chr2R:4846612:4846839:+.B.dn'	(0,0):13,(0,1):5,(1,0):95,(1,1):5	0:99,1:6	(0,0):11,(0,1):9,(1,0):71,(1,1):21	0:77,1:24	chr2R	+	48445344844534	48468394846839
chr2R:3375961:3376252:-@chr2R:3373390:3373672:-	ri	0.52	0.38	0.66	0.21	0.14	0.32	0.31	35.44	'chr2R:3375961:3376252:-@chr2R:3373390:3373672:-.A.withRI','chr2R:3375961:3376252:-@chr2R:3373390:3373672:-.B.dn_chr2R:3375961:3376252:-@chr2R:3373390:3373672:-.B.up'	(0,0):10,(0,1):7,(1,0):142,(1,1):28	0:157,1:20	(0,0):8,(0,1):5,(1,0):44,(1,1):30	0:52,1:27	chr2R	-	33733903373390	33762523376252
chr3R:2894728:2894910:+@chr3R:2895007:2895660:+	ri	0.53	0.32	0.73	0.22	0.11	0.38	0.31	5.71	'chr3R:2894728:2894910:+@chr3R:2895007:2895660:+.A.withRI','chr3R:2894728:2894910:+@chr3R:2895007:2895660:+.B.up_chr3R:2894728:2894910:+@chr3R:2895007:2895660:+.B.dn'	(0,0):15,(0,1):3,(1,0):12,(1,1):70	0:36,1:49	(0,0):13,(0,1):11,(1,0):7,(1,1):89	0:31,1:76	chr3R	+	28947282894728	28956602895660
chr2R:13685190:13685366:+@chr2R:13685430:13685640:+	ri	0.89	0.71	1	0.58	0.32	0.8	0.31	3.74	'chr2R:13685190:13685366:+@chr2R:13685430:13685640:+.A.withRI','chr2R:13685190:13685366:+@chr2R:13685430:13685640:+.B.up_chr2R:13685190:13685366:+@chr2R:13685430:13685640:+.B.dn'	(0,0):5,(1,0):16,(1,1):8	0:23,1:1	(0,0):6,(0,1):3,(1,0):10,(1,1):6	0:12,1:7	chr2R	+	1368519013685190	1368564013685640
chr2L:16820943:16821110:-@chr2L:16803271:16803675:-	ri	0.5	0.36	0.67	0.18	0.15	0.22	0.32	3480.48	'chr2L:16820943:16821110:-@chr2L:16803271:16803675:-.A.withRI','chr2L:16820943:16821110:-@chr2L:16803271:16803675:-.B.dn_chr2L:16820943:16821110:-@chr2L:16803271:16803675:-.B.up'	(0,0):194,(0,1):8,(1,0):560,(1,1):8	0:563,1:13	(0,0):225,(0,1):49,(1,0):870,(1,1):47	0:878,1:88	chr2L	-	1680327116803270	1682111016821110
chr2L:74253:74572:+@chr2L:75078:75366:+	ri	0.82	0.62	0.99	0.5	0.35	0.68	0.32	3.94	'chr2L:74253:74572:+@chr2L:75078:75366:+.A.withRI','chr2L:74253:74572:+@chr2L:75078:75366:+.B.up_chr2L:74253:74572:+@chr2L:75078:75366:+.B.dn'	(0,0):72,(1,0):57,(1,1):54	0:107,1:4	(0,0):105,(0,1):1,(1,0):43,(1,1):70	0:81,1:33	chr2L	+	7425374253	7536675366
chr3R:16447644:16448220:+@chr3R:16448306:16449020:+	ri	0.72	0.55	0.87	0.39	0.25	0.54	0.33	22.73	'chr3R:16447644:16448220:+@chr3R:16448306:16449020:+.A.withRI','chr3R:16447644:16448220:+@chr3R:16448306:16449020:+.B.up_chr3R:16447644:16448220:+@chr3R:16448306:16449020:+.B.dn'	(0,0):2,(0,1):5,(1,0):26,(1,1):124	0:127,1:28	(0,0):7,(0,1):9,(1,0):14,(1,1):158	0:85,1:96	chr3R	+	1644764416447640	1644902016449020
chr2R:15064096:15064248:+@chr2R:15064808:15064863:+	ri	0.43	0.17	0.82	0.1	0.03	0.24	0.33	3.63	'chr2R:15064096:15064248:+@chr2R:15064808:15064863:+.A.withRI','chr2R:15064096:15064248:+@chr2R:15064808:15064863:+.B.up_chr2R:15064096:15064248:+@chr2R:15064808:15064863:+.B.dn'	(0,0):20,(0,1):1,(1,0):12,(1,1):2	0:12,1:3	(0,0):14,(0,1):3,(1,0):7,(1,1):5	0:8,1:7	chr2R	+	1506409615064090	1506486315064860
chr2L:17717843:17718034:-@chr2L:17715723:17715913:-	ri	0.64	0.39	0.87	0.31	0.22	0.44	0.33	3.57	'chr2L:17717843:17718034:-@chr2L:17715723:17715913:-.A.withRI','chr2L:17717843:17718034:-@chr2L:17715723:17715913:-.B.dn_chr2L:17717843:17718034:-@chr2L:17715723:17715913:-.B.up'	(0,0):37,(0,1):1,(1,0):97,(1,1):12	0:100,1:10	(0,0):40,(0,1):10,(1,0):98,(1,1):16	0:100,1:24	chr2L	-	1771572317715720	1771803417718030
chr3R:25574542:25574564:-@chr3R:25573424:25574491:-	ri	0.92	0.76	0.99	0.58	0.41	0.76	0.34	12.98	'chr3R:25574542:25574564:-@chr3R:25573424:25574491:-.A.withRI','chr3R:25574542:25574564:-@chr3R:25573424:25574491:-.B.dn_chr3R:25574542:25574564:-@chr3R:25573424:25574491:-.B.up'	(0,0):75,(1,0):44,(1,1):779	0:752,1:71	(0,0):62,(1,0):26,(1,1):825	0:412,1:439	chr3R	-	2557342425573420	2557456425574560
chr2R:3371152:3371304:-@chr2R:3370918:3371069:-	ri	0.49	0.31	0.7	0.15	0.03	0.34	0.34	12.08	'chr2R:3371152:3371304:-@chr2R:3370918:3371069:-.A.withRI','chr2R:3371152:3371304:-@chr2R:3370918:3371069:-.B.dn_chr2R:3371152:3371304:-@chr2R:3370918:3371069:-.B.up'	(0,0):13,(0,1):5,(1,0):15,(1,1):6	0:16,1:10	(0,0):8,(0,1):7,(1,0):2,(1,1):7	0:2,1:14	chr2R	-	33709183370918	33713043371304
chr2L:11008911:11009330:+@chr2L:11009443:11009565:+	ri	0.64	0.39	0.86	0.3	0.12	0.51	0.34	6.17	'chr2L:11008911:11009330:+@chr2L:11009443:11009565:+.A.withRI','chr2L:11008911:11009330:+@chr2L:11009443:11009565:+.B.up_chr2L:11008911:11009330:+@chr2L:11009443:11009565:+.B.dn'	(0,0):20,(1,0):12,(1,1):46	0:41,1:17	(0,0):18,(0,1):1,(1,0):5,(1,1):43	0:15,1:34	chr2L	+	1100891111008910	1100956511009560
chrX:16499883:16500041:+@chrX:16501966:16502033:+	ri	0.46	0.17	0.77	0.12	0.06	0.25	0.34	3.33	'chrX:16499883:16500041:+@chrX:16501966:16502033:+.A.withRI','chrX:16499883:16500041:+@chrX:16501966:16502033:+.B.up_chrX:16499883:16500041:+@chrX:16501966:16502033:+.B.dn'	(0,0):18,(0,1):2,(1,0):39	0:39,1:2	(0,0):34,(0,1):4,(1,0):36,(1,1):6	0:38,1:8	chrX	+	1649988316499880	1650203316502030
chr2R:2820629:2821432:-@chr2R:2817754:2817875:-	ri	0.67	0.44	0.98	0.32	0.22	0.43	0.35	7.39	'chr2R:2820629:2821432:-@chr2R:2817754:2817875:-.A.withRI','chr2R:2820629:2821432:-@chr2R:2817754:2817875:-.B.dn_chr2R:2820629:2821432:-@chr2R:2817754:2817875:-.B.up'	(0,0):11,(0,1):1,(1,0):72,(1,1):25	0:93,1:5	(0,0):11,(0,1):1,(1,0):68,(1,1):58	0:84,1:43	chr2R	-	28177542817754	28214322821432
chr3R:8792275:8792442:-@chr3R:8791660:8792198:-	ri	0.47	0.26	0.69	0.11	0.04	0.2	0.36	16.17	'chr3R:8792275:8792442:-@chr3R:8791660:8792198:-.A.withRI','chr3R:8792275:8792442:-@chr3R:8791660:8792198:-.B.dn_chr3R:8792275:8792442:-@chr3R:8791660:8792198:-.B.up'	(0,0):6,(0,1):3,(1,0):8,(1,1):52	0:26,1:37	(0,0):14,(0,1):12,(1,0):4,(1,1):123	0:12,1:127	chr3R	-	87916608791660	87924428792442
chr2R:13320696:13320839:-@chr2R:13320279:13320629:-	ri	0.68	0.42	0.96	0.32	0.13	0.6	0.36	3.34	'chr2R:13320696:13320839:-@chr2R:13320279:13320629:-.A.withRI','chr2R:13320696:13320839:-@chr2R:13320279:13320629:-.B.dn_chr2R:13320696:13320839:-@chr2R:13320279:13320629:-.B.up'	(0,0):19,(1,0):7,(1,1):24	0:18,1:13	(0,0):39,(1,0):4,(1,1):37	0:18,1:23	chr2R	-	1332027913320270	1332083913320830
chrX:712439:712468:-@chrX:705060:705401:-	ri	0.76	0.55	0.93	0.39	0.3	0.51	0.37	47.27	'chrX:712439:712468:-@chrX:705060:705401:-.A.withRI','chrX:712439:712468:-@chrX:705060:705401:-.B.dn_chrX:712439:712468:-@chrX:705060:705401:-.B.up'	(0,0):10,(0,1):1,(1,0):798,(1,1):21	0:818,1:2	(0,0):9,(0,1):7,(1,0):668,(1,1):33	0:678,1:30	chrX	-	705060705060	712468712468
chr2R:8540692:8541563:+@chr2R:8541631:8541757:+	ri	0.49	0.26	0.73	0.12	0.03	0.26	0.37	13.01	'chr2R:8540692:8541563:+@chr2R:8541631:8541757:+.A.withRI','chr2R:8540692:8541563:+@chr2R:8541631:8541757:+.B.up_chr2R:8540692:8541563:+@chr2R:8541631:8541757:+.B.dn'	(0,0):9,(0,1):4,(1,0):8,(1,1):82	0:59,1:35	(0,0):17,(0,1):15,(1,0):2,(1,1):96	0:9,1:104	chr2R	+	85406928540692	85417578541757
chrX:11778356:11778404:-@chrX:11777235:11777654:-	ri	0.54	0.25	0.83	0.16	0.06	0.36	0.38	8.77	'chrX:11778356:11778404:-@chrX:11777235:11777654:-.A.withRI','chrX:11778356:11778404:-@chrX:11777235:11777654:-.B.dn_chrX:11778356:11778404:-@chrX:11777235:11777654:-.B.up'	(0,0):8,(1,0):12,(1,1):10	0:14,1:8	(0,0):5,(1,0):4,(1,1):13	0:9,1:8	chrX	-	1177723511777230	1177840411778400
chr2L:13774837:13775047:-@chr2L:13774343:13774767:-	ri	0.91	0.73	0.99	0.53	0.32	0.76	0.38	5	'chr2L:13774837:13775047:-@chr2L:13774343:13774767:-.A.withRI','chr2L:13774837:13775047:-@chr2L:13774343:13774767:-.B.dn_chr2L:13774837:13775047:-@chr2L:13774343:13774767:-.B.up'	(0,0):9,(1,0):21,(1,1):45	0:58,1:8	(0,0):9,(0,1):4,(1,0):12,(1,1):52	0:28,1:40	chr2L	-	1377434313774340	1377504713775040
chr2L:74253:74572:+@chr2L:74903:75018:+	ri	0.65	0.45	0.82	0.26	0.16	0.39	0.39	84.64	'chr2L:74253:74572:+@chr2L:74903:75018:+.A.withRI','chr2L:74253:74572:+@chr2L:74903:75018:+.B.up_chr2L:74253:74572:+@chr2L:74903:75018:+.B.dn'	(0,0):24,(0,1):4,(1,0):26,(1,1):9	0:32,1:7	(0,0):32,(0,1):19,(1,0):21,(1,1):17	0:23,1:34	chr2L	+	7425374253	7501875018
chr2R:3377046:3377075:-@chr2R:3373390:3373672:-	ri	0.52	0.29	0.91	0.13	0.08	0.22	0.39	74.84	'chr2R:3377046:3377075:-@chr2R:3373390:3373672:-.A.withRI','chr2R:3377046:3377075:-@chr2R:3373390:3373672:-.B.dn_chr2R:3377046:3377075:-@chr2R:3373390:3373672:-.B.up'	(0,0):31,(1,0):190,(1,1):14	0:198,1:6	(0,0):25,(1,0):70,(1,1):21	0:77,1:14	chr2R	-	33733903373390	33770753377075
chr3R:27405675:27406426:-@chr3R:27403026:27405607:-	ri	0.87	0.66	0.99	0.48	0.26	0.69	0.39	9.43	'chr3R:27405675:27406426:-@chr3R:27403026:27405607:-.A.withRI','chr3R:27405675:27406426:-@chr3R:27403026:27405607:-.B.dn_chr3R:27405675:27406426:-@chr3R:27403026:27405607:-.B.up'	(0,0):8,(0,1):1,(1,0):12,(1,1):177	0:174,1:16	(0,0):7,(0,1):7,(1,0):11,(1,1):194	0:88,1:124	chr3R	-	2740302627403020	2740642627406420
chrX:166455:166916:-@chrX:165835:165908:-	ri	0.8	0.55	0.99	0.41	0.21	0.71	0.39	3.28	'chrX:166455:166916:-@chrX:165835:165908:-.A.withRI','chrX:166455:166916:-@chrX:165835:165908:-.B.dn_chrX:166455:166916:-@chrX:165835:165908:-.B.up'	(0,0):12,(1,0):35,(1,1):24	0:56,1:3	(0,0):14,(1,0):20,(1,1):35	0:39,1:16	chrX	-	165835165835	166916166916
chr2R:5731242:5731408:+@chr2R:5731486:5731906:+	ri	0.54	0.27	0.92	0.14	0.05	0.35	0.4	7.02	'chr2R:5731242:5731408:+@chr2R:5731486:5731906:+.A.withRI','chr2R:5731242:5731408:+@chr2R:5731486:5731906:+.B.up_chr2R:5731242:5731408:+@chr2R:5731486:5731906:+.B.dn'	(0,0):30,(1,0):7,(1,1):67	0:48,1:26	(0,0):44,(1,0):3,(1,1):112	0:25,1:90	chr2R	+	57312425731242	57319065731906
chr3L:21399682:21399926:-@chr3L:21399040:21399618:-	ri	0.46	0.14	0.75	0.06	0.01	0.16	0.4	6.8	'chr3L:21399682:21399926:-@chr3L:21399040:21399618:-.A.withRI','chr3L:21399682:21399926:-@chr3L:21399040:21399618:-.B.dn_chr3L:21399682:21399926:-@chr3L:21399040:21399618:-.B.up'	(0,0):2,(0,1):3,(1,0):5,(1,1):41	0:37,1:12	(0,0):11,(0,1):20,(1,0):1,(1,1):78	0:3,1:96	chr3L	-	2139904021399040	2139992621399920
chr3R:1119352:1119483:-@chr3R:1118941:1119092:-	ri	0.85	0.52	0.99	0.45	0.21	0.74	0.4	3.65	'chr3R:1119352:1119483:-@chr3R:1118941:1119092:-.A.withRI','chr3R:1119352:1119483:-@chr3R:1118941:1119092:-.B.dn_chr3R:1119352:1119483:-@chr3R:1118941:1119092:-.B.up'	(0,0):43,(1,0):18,(1,1):1	0.0131944	(0,0):39,(0,1):2,(1,0):10,(1,1):6	0:14,1:4	chr3R	-	11189411118941	11194831119483
chr3R:19333051:19333170:-@chr3R:19332631:19332980:-	ri	0.7	0.4	0.96	0.3	0.1	0.59	0.4	3.63	'chr3R:19333051:19333170:-@chr3R:19332631:19332980:-.A.withRI','chr3R:19333051:19333170:-@chr3R:19332631:19332980:-.B.dn_chr3R:19333051:19333170:-@chr3R:19332631:19332980:-.B.up'	(1,0):10,(1,1):18	0:23,1:5	(0,0):3,(0,1):4,(1,0):4,(1,1):33	0:9,1:32	chr3R	-	1933263119332630	1933317019333170
chr3R:8850546:8850751:+@chr3R:8851111:8851179:+	ri	0.67	0.31	0.94	0.27	0.12	0.51	0.4	3.47	'chr3R:8850546:8850751:+@chr3R:8851111:8851179:+.A.withRI','chr3R:8850546:8850751:+@chr3R:8851111:8851179:+.B.up_chr3R:8850546:8850751:+@chr3R:8851111:8851179:+.B.dn'	(0,0):12,(0,1):1,(1,0):14,(1,1):1	0:15,1:1	(0,0):12,(0,1):5,(1,0):10,(1,1):2	0:10,1:7	chr3R	+	88505468850546	88511798851179
chr3R:9522159:9522490:-@chr3R:9521925:9522068:-	ri	0.49	0.16	0.88	0.08	0	0.23	0.41	5.67	'chr3R:9522159:9522490:-@chr3R:9521925:9522068:-.A.withRI','chr3R:9522159:9522490:-@chr3R:9521925:9522068:-.B.dn_chr3R:9522159:9522490:-@chr3R:9521925:9522068:-.B.up'	(0,0):18,(0,1):1,(1,0):2,(1,1):8	0:6,1:5	(0,0):22,(0,1):1,(1,1):27	0:0,1:28	chr3R	-	95219259521925	95224909522490
chr3R:21570088:21570264:-@chr3R:21568114:21568247:-	ri	0.64	0.31	0.94	0.23	0.1	0.43	0.41	4.42	'chr3R:21570088:21570264:-@chr3R:21568114:21568247:-.A.withRI','chr3R:21570088:21570264:-@chr3R:21568114:21568247:-.B.dn_chr3R:21570088:21570264:-@chr3R:21568114:21568247:-.B.up'	(0,0):13,(0,1):1,(1,0):27	0:27,1:1	(0,0):12,(0,1):2,(1,0):19,(1,1):4	0:20,1:5	chr3R	-	2156811421568110	2157026421570260
chr2L:8661359:8661487:+@chr2L:8662457:8662646:+	ri	0.54	0.23	0.92	0.13	0.05	0.27	0.41	4.03	'chr2L:8661359:8661487:+@chr2L:8662457:8662646:+.A.withRI','chr2L:8661359:8661487:+@chr2L:8662457:8662646:+.B.up_chr2L:8661359:8661487:+@chr2L:8662457:8662646:+.B.dn'	(0,0):7,(0,1):1,(1,0):12,(1,1):1	0:13,1:1	(0,0):18,(0,1):7,(1,0):9,(1,1):2	0:9,1:9	chr2L	+	86613598661359	86626468662646
chr3L:2509364:2509500:-@chr3L:2508876:2508907:-	ri	0.7	0.35	0.96	0.29	0.11	0.55	0.41	3.6	'chr3L:2509364:2509500:-@chr3L:2508876:2508907:-.A.withRI','chr3L:2509364:2509500:-@chr3L:2508876:2508907:-.B.dn_chr3L:2509364:2509500:-@chr3L:2508876:2508907:-.B.up'	(0,0):7,(1,0):17	0.0118056	(0,0):15,(0,1):3,(1,0):18,(1,1):1	0:19,1:3	chr3L	-	25088762508876	25095002509500
chr2L:7023529:7023940:-@chr2L:7019135:7019382:-	ri	0.46	0.43	0.49	0.04	0.03	0.04	0.42	1000000000000	'chr2L:7023529:7023940:-@chr2L:7019135:7019382:-.A.withRI','chr2L:7023529:7023940:-@chr2L:7019135:7019382:-.B.dn_chr2L:7023529:7023940:-@chr2L:7019135:7019382:-.B.up'	(0,0):662,(0,1):171,(1,0):2922,(1,1):356	0:3069,1:380	(0,0):93,(0,1):308,(1,0):360,(1,1):777	0:387,1:1058	chr2L	-	70191357019135	70239407023940
chr2R:9095156:9095698:+@chr2R:9095758:9097974:+	ri	0.6	0.29	0.9	0.18	0.07	0.35	0.42	11.29	'chr2R:9095156:9095698:+@chr2R:9095758:9097974:+.A.withRI','chr2R:9095156:9095698:+@chr2R:9095758:9097974:+.B.up_chr2R:9095156:9095698:+@chr2R:9095758:9097974:+.B.dn'	(0,0):25,(1,0):5,(1,1):175	0:86,1:94	(0,0):75,(0,1):13,(1,0):5,(1,1):258	0:36,1:240	chr2R	+	90951569095156	90979749097974
chrX:20934829:20935070:-@chrX:20933620:20934442:-	ri	0.81	0.57	0.96	0.39	0.17	0.65	0.42	9.89	'chrX:20934829:20935070:-@chrX:20933620:20934442:-.A.withRI','chrX:20934829:20935070:-@chrX:20933620:20934442:-.B.dn_chrX:20934829:20935070:-@chrX:20933620:20934442:-.B.up'	(0,0):4,(1,0):12,(1,1):23	0:31,1:4	(0,0):6,(0,1):5,(1,0):7,(1,1):20	0:11,1:21	chrX	-	2093362020933620	2093507020935070
chr3L:17377121:17377297:+@chr3L:17378969:17378969:+	ri	0.54	0.2	0.93	0.12	0.03	0.5	0.42	3.54	'chr3L:17377121:17377297:+@chr3L:17378969:17378969:+.A.withRI','chr3L:17377121:17377297:+@chr3L:17378969:17378969:+.B.up_chr3L:17377121:17377297:+@chr3L:17378969:17378969:+.B.dn'	(0,0):14,(1,0):81,(1,1):4	0:84,1:1	(0,0):2,(1,0):14,(1,1):5	0:15,1:4	chr3L	+	1737712117377120	1737896917378960
chr3R:21539564:21539632:-@chr3R:21535747:21535869:-	ri	0.7	0.33	0.96	0.28	0.17	0.45	0.42	3.33	'chr3R:21539564:21539632:-@chr3R:21535747:21535869:-.A.withRI','chr3R:21539564:21539632:-@chr3R:21535747:21535869:-.B.dn_chr3R:21539564:21539632:-@chr3R:21535747:21535869:-.B.up'	(0,0):21,(1,0):145	0.100694	(0,0):70,(0,1):9,(1,0):309	0:309,1:9	chr3R	-	2153574721535740	2153963221539630
chr2R:3377325:3377402:-@chr2R:3373390:3373672:-	ri	0.66	0.41	0.92	0.23	0.13	0.37	0.43	40.98	'chr2R:3377325:3377402:-@chr2R:3373390:3373672:-.A.withRI','chr2R:3377325:3377402:-@chr2R:3373390:3373672:-.B.dn_chr2R:3377325:3377402:-@chr2R:3373390:3373672:-.B.up'	(0,0):37,(1,0):207,(1,1):14	0:217,1:4	(0,0):28,(1,0):91,(1,1):21	0:100,1:12	chr2R	-	33733903373390	33774023377402
chr2R:20872173:20872321:-@chr2R:20867056:20867184:-	ri	0.63	0.41	0.85	0.19	0.13	0.27	0.44	4036.78	'chr2R:20872173:20872321:-@chr2R:20867056:20867184:-.A.withRI','chr2R:20872173:20872321:-@chr2R:20867056:20867184:-.B.dn_chr2R:20872173:20872321:-@chr2R:20867056:20867184:-.B.up'	(0,0):129,(0,1):3,(1,0):354,(1,1):2	0:355,1:4	(0,0):99,(0,1):17,(1,0):250,(1,1):5	0:253,1:19	chr2R	-	2086705620867050	2087232120872320
chr2R:18070328:18070443:-@chr2R:18064876:18066001:-	ri	0.85	0.68	0.99	0.41	0.28	0.59	0.44	36.63	'chr2R:18070328:18070443:-@chr2R:18064876:18066001:-.A.withRI','chr2R:18070328:18070443:-@chr2R:18064876:18066001:-.B.dn_chr2R:18070328:18070443:-@chr2R:18064876:18066001:-.B.up'	(0,0):30,(1,0):154,(1,1):40	0:188,1:6	(0,0):17,(1,0):78,(1,1):48	0:101,1:25	chr2R	-	1806487618064870	1807044318070440
chrX:3760545:3760750:-@chrX:3759391:3759472:-	ri	0.76	0.48	0.95	0.32	0.16	0.54	0.44	16.1	'chrX:3760545:3760750:-@chrX:3759391:3759472:-.A.withRI','chrX:3760545:3760750:-@chrX:3759391:3759472:-.B.dn_chrX:3760545:3760750:-@chrX:3759391:3759472:-.B.up'	(0,0):21,(1,0):75,(1,1):6	0:80,1:1	(0,0):8,(0,1):3,(1,0):27,(1,1):5	0:29,1:6	chrX	-	37593913759391	37607503760750
chr2R:3405940:3406483:-@chr2R:3405530:3405883:-	ri	0.55	0.23	0.81	0.11	0.01	0.36	0.44	4.72	'chr2R:3405940:3406483:-@chr2R:3405530:3405883:-.A.withRI','chr2R:3405940:3406483:-@chr2R:3405530:3405883:-.B.dn_chr2R:3405940:3406483:-@chr2R:3405530:3405883:-.B.up'	(0,0):1,(0,1):3,(1,0):4,(1,1):19	0:14,1:12	(0,1):7,(1,1):27	0:0,1:34	chr2R	-	34055303405530	34064833406483
chr3R:16625739:16626022:+@chr3R:16630397:16630465:+	ri	0.66	0.45	0.83	0.21	0.16	0.28	0.45	1286.48	'chr3R:16625739:16626022:+@chr3R:16630397:16630465:+.A.withRI','chr3R:16625739:16626022:+@chr3R:16630397:16630465:+.B.up_chr3R:16625739:16626022:+@chr3R:16630397:16630465:+.B.dn'	(0,0):71,(0,1):4,(1,0):320,(1,1):6	0:321,1:9	(0,0):132,(0,1):23,(1,0):264,(1,1):17	0:268,1:36	chr3R	+	1662573916625730	1663046516630460
chr2R:3183356:3185290:+@chr2R:3185357:3185788:+	ri	0.84	0.65	0.95	0.39	0.16	0.66	0.45	52.46	'chr2R:3183356:3185290:+@chr2R:3185357:3185788:+.A.withRI','chr2R:3183356:3185290:+@chr2R:3185357:3185788:+.B.up_chr2R:3183356:3185290:+@chr2R:3185357:3185788:+.B.dn'	(0,0):17,(0,1):2,(1,0):22,(1,1):264	0:231,1:57	(0,0):14,(0,1):4,(1,0):6,(1,1):324	0:183,1:151	chr2R	+	31833563183356	31857883185788
chr3R:3617393:3618442:+@chr3R:3618601:3619221:+	ri	0.62	0.37	0.92	0.17	0.01	0.4	0.45	13.13	'chr3R:3617393:3618442:+@chr3R:3618601:3619221:+.A.withRI','chr3R:3617393:3618442:+@chr3R:3618601:3619221:+.B.up_chr3R:3617393:3618442:+@chr3R:3618601:3619221:+.B.dn'	(0,0):1,(0,1):2,(1,0):7,(1,1):37	0:35,1:11	(0,0):1,(0,1):7,(1,0):2,(1,1):37	0:7,1:39	chr3R	+	36173933617393	36192213619221
chr3R:24821188:24821262:-@chr3R:24820984:24821096:-	ri	0.52	0.18	0.91	0.07	0	0.23	0.45	10.86	'chr3R:24821188:24821262:-@chr3R:24820984:24821096:-.A.withRI','chr3R:24821188:24821262:-@chr3R:24820984:24821096:-.B.dn_chr3R:24821188:24821262:-@chr3R:24820984:24821096:-.B.up'	(0,0):24,(0,1):1,(1,0):3	0:3,1:1	(0,0):31,(0,1):4,(1,1):1	0:0,1:5	chr3R	-	2482098424820980	2482126224821260
chr4:793029:793085:+@chr4:794643:794743:+	ri	0.63	0.26	0.95	0.18	0.07	0.41	0.45	4.18	'chr4:793029:793085:+@chr4:794643:794743:+.A.withRI','chr4:793029:793085:+@chr4:794643:794743:+.B.up_chr4:793029:793085:+@chr4:794643:794743:+.B.dn'	(0,0):29,(1,0):36	0.025	(0,0):39,(0,1):4,(1,0):43,(1,1):1	0:44,1:4	chr4	+	793029793029	794743794743
chr2R:8744160:8744253:-@chr2R:8737604:8737733:-	ri	0.66	0.26	0.95	0.21	0.1	0.53	0.45	3.35	'chr2R:8744160:8744253:-@chr2R:8737604:8737733:-.A.withRI','chr2R:8744160:8744253:-@chr2R:8737604:8737733:-.B.dn_chr2R:8744160:8744253:-@chr2R:8737604:8737733:-.B.up'	(0,0):48,(1,0):233,(1,1):3	0.163889	(0,0):87,(0,1):1,(1,0):197,(1,1):9	0:197,1:10	chr2R	-	87376048737604	87442538744253
chr2R:20871904:20872025:-@chr2R:20867056:20867184:-	ri	0.8	0.53	0.97	0.34	0.2	0.55	0.46	23.69	'chr2R:20871904:20872025:-@chr2R:20867056:20867184:-.A.withRI','chr2R:20871904:20872025:-@chr2R:20867056:20867184:-.B.dn_chr2R:20871904:20872025:-@chr2R:20867056:20867184:-.B.up'	(0,0):128,(1,0):345,(1,1):2	0.240972	(0,0):93,(0,1):5,(1,0):233,(1,1):4	0:234,1:8	chr2R	-	2086705620867050	2087202520872020
chr3L:8628102:8628181:+@chr3L:8631257:8631295:+	ri	0.53	0.21	0.85	0.07	0.02	0.26	0.46	12.47	'chr3L:8628102:8628181:+@chr3L:8631257:8631295:+.A.withRI','chr3L:8628102:8628181:+@chr3L:8631257:8631295:+.B.up_chr3L:8628102:8628181:+@chr3L:8631257:8631295:+.B.dn'	(0,0):392,(1,0):83	0.0576389	(0,0):432,(0,1):4,(1,0):46	0:46,1:4	chr3L	+	86281028628102	86312958631295
chr3R:13711326:13711669:-@chr3R:13707823:13707905:-	ri	0.69	0.28	0.95	0.23	0.12	0.39	0.46	4.54	'chr3R:13711326:13711669:-@chr3R:13707823:13707905:-.A.withRI','chr3R:13711326:13711669:-@chr3R:13707823:13707905:-.B.dn_chr3R:13711326:13711669:-@chr3R:13707823:13707905:-.B.up'	(0,0):1,(1,0):29,(1,1):2	0.0215278	(0,1):5,(1,0):35,(1,1):5	0:37,1:8	chr3R	-	1370782313707820	1371166913711660
chr3R:260377:261172:+@chr3R:261245:261897:+	ri	0.62	0.26	0.94	0.16	0.03	0.42	0.46	3.7	'chr3R:260377:261172:+@chr3R:261245:261897:+.A.withRI','chr3R:260377:261172:+@chr3R:261245:261897:+.B.up_chr3R:260377:261172:+@chr3R:261245:261897:+.B.dn'	(0,0):7,(1,0):3,(1,1):70	0:15,1:58	(0,0):9,(1,0):1,(1,1):96	0:40,1:57	chr3R	+	260377260377	261897261897
chr3R:19998776:19998834:+@chr3R:20006015:20006174:+	ri	0.61	0.21	0.93	0.15	0.06	0.32	0.46	3.23	'chr3R:19998776:19998834:+@chr3R:20006015:20006174:+.A.withRI','chr3R:19998776:19998834:+@chr3R:20006015:20006174:+.B.up_chr3R:19998776:19998834:+@chr3R:20006015:20006174:+.B.dn'	(0,0):4,(1,0):67	0.0465278	(0,0):9,(0,1):5,(1,0):106,(1,1):1	0:106,1:6	chr3R	+	1999877619998770	2000617420006170
chrX:13721373:13721542:-@chrX:13721076:13721153:-	ri	0.59	0.21	0.94	0.12	0	0.57	0.47	3.83	'chrX:13721373:13721542:-@chrX:13721076:13721153:-.A.withRI','chrX:13721373:13721542:-@chrX:13721076:13721153:-.B.dn_chrX:13721373:13721542:-@chrX:13721076:13721153:-.B.up'	(0,0):20,(1,0):3,(1,1):1	0.00277778	(0,0):19,(1,1):6	0:0,1:6	chrX	-	1372107613721070	1372154213721540
chr3R:1065411:1065568:-@chr3R:1065214:1065341:-	ri	0.69	0.36	0.93	0.21	0.04	0.45	0.48	8.79	'chr3R:1065411:1065568:-@chr3R:1065214:1065341:-.A.withRI','chr3R:1065411:1065568:-@chr3R:1065214:1065341:-.B.dn_chr3R:1065411:1065568:-@chr3R:1065214:1065341:-.B.up'	(0,0):64,(1,0):5,(1,1):6	0:5,1:6	(0,0):118,(0,1):1,(1,0):2,(1,1):14	0:2,1:15	chr3R	-	10652141065214	10655681065568
chr2R:19909756:19909779:-@chr2R:19909313:19909607:-	ri	0.76	0.42	0.99	0.28	0.11	0.55	0.48	6.1	'chr2R:19909756:19909779:-@chr2R:19909313:19909607:-.A.withRI','chr2R:19909756:19909779:-@chr2R:19909313:19909607:-.B.dn_chr2R:19909756:19909779:-@chr2R:19909313:19909607:-.B.up'	(0,0):8,(1,0):17,(1,1):19	0:31,1:5	(0,0):14,(1,0):9,(1,1):34	0:16,1:27	chr2R	-	1990931319909310	1990977919909770
chrX:16637820:16637881:+@chrX:16637965:16638368:+	ri	0.55	0.19	0.9	0.07	0	0.23	0.48	4.05	'chrX:16637820:16637881:+@chrX:16637965:16638368:+.A.withRI','chrX:16637820:16637881:+@chrX:16637965:16638368:+.B.up_chrX:16637820:16637881:+@chrX:16637965:16638368:+.B.dn'	(0,0):9,(1,0):4,(1,1):15	0:18,1:1	(0,0):36,(0,1):6,(1,1):39	0:5,1:40	chrX	+	1663782016637820	1663836816638360
chr2L:20459385:20460390:+@chr2L:20460481:20461050:+	ri	0.6	0.17	0.92	0.12	0.03	0.29	0.48	3.79	'chr2L:20459385:20460390:+@chr2L:20460481:20461050:+.A.withRI','chr2L:20459385:20460390:+@chr2L:20460481:20461050:+.B.up_chr2L:20459385:20460390:+@chr2L:20460481:20461050:+.B.dn'	(0,0):4,(1,0):3,(1,1):100	0:67,1:36	(0,0):15,(1,0):1,(1,1):178	0:9,1:170	chr2L	+	2045938520459380	2046105020461050
chr2R:4842239:4842356:+@chr2R:4846612:4846839:+	ri	0.77	0.51	0.98	0.28	0.18	0.43	0.49	36.73	'chr2R:4842239:4842356:+@chr2R:4846612:4846839:+.A.withRI','chr2R:4842239:4842356:+@chr2R:4846612:4846839:+.B.up_chr2R:4842239:4842356:+@chr2R:4846612:4846839:+.B.dn'	(0,0):61,(1,0):190,(1,1):5	0:193,1:2	(0,0):52,(0,1):1,(1,0):164,(1,1):21	0:176,1:10	chr2R	+	48422394842239	48468394846839
chrX:3723394:3724104:+@chrX:3724187:3724487:+	ri	0.78	0.48	0.95	0.29	0.11	0.51	0.49	8.1	'chrX:3723394:3724104:+@chrX:3724187:3724487:+.A.withRI','chrX:3723394:3724104:+@chrX:3724187:3724487:+.B.up_chrX:3723394:3724104:+@chrX:3724187:3724487:+.B.dn'	(0,0):4,(0,1):1,(1,0):9,(1,1):21	0:26,1:5	(0,0):2,(0,1):6,(1,0):5,(1,1):42	0:15,1:38	chrX	+	37233943723394	37244873724487
chr3R:19333162:19333170:-@chr3R:19332631:19332980:-	ri	0.73	0.42	0.95	0.22	0.07	0.43	0.51	21.71	'chr3R:19333162:19333170:-@chr3R:19332631:19332980:-.A.withRI','chr3R:19333162:19333170:-@chr3R:19332631:19332980:-.B.dn_chr3R:19333162:19333170:-@chr3R:19332631:19332980:-.B.up'	(1,0):14,(1,1):14	0:21,1:7	(0,0):7,(1,0):6,(1,1):31	0:9,1:28	chr3R	-	1933263119332630	1933317019333170
chr2L:19508352:19508760:-@chr2L:19507490:19508265:-	ri	0.6	0.38	0.84	0.08	0.01	0.26	0.52	38.7	'chr2L:19508352:19508760:-@chr2L:19507490:19508265:-.A.withRI','chr2L:19508352:19508760:-@chr2L:19507490:19508265:-.B.dn_chr2L:19508352:19508760:-@chr2L:19507490:19508265:-.B.up'	(0,0):5,(0,1):2,(1,0):11,(1,1):76	0:51,1:38	(0,0):10,(0,1):5,(1,1):102	0:2,1:105	chr2L	-	1950749019507490	1950876019508760
chr3L:836771:837514:-@chr3L:836667:836707:-	ri	0.71	0.4	0.99	0.19	0.03	0.65	0.52	4.9	'chr3L:836771:837514:-@chr3L:836667:836707:-.A.withRI','chr3L:836771:837514:-@chr3L:836667:836707:-.B.dn_chr3L:836771:837514:-@chr3L:836667:836707:-.B.up'	(0,0):7,(1,0):5,(1,1):64	0:57,1:12	(0,0):12,(1,0):2,(1,1):157	0:11,1:148	chr3L	-	836667836667	837514837514
chr2R:4720209:4720375:+@chr2R:4722457:4722606:+	ri	0.77	0.44	0.96	0.24	0.08	0.55	0.53	10.85	'chr2R:4720209:4720375:+@chr2R:4722457:4722606:+.A.withRI','chr2R:4720209:4720375:+@chr2R:4722457:4722606:+.B.up_chr2R:4720209:4720375:+@chr2R:4722457:4722606:+.B.dn'	(0,0):9,(1,0):24	0.0166667	(0,0):5,(0,1):3,(1,0):14,(1,1):1	0:14,1:4	chr2R	+	47202094720209	47226064722606
chr3R:9522164:9522490:-@chr3R:9521925:9522068:-	ri	0.64	0.16	0.99	0.1	0.02	0.29	0.54	3.89	'chr3R:9522164:9522490:-@chr3R:9521925:9522068:-.A.withRI','chr3R:9522164:9522490:-@chr3R:9521925:9522068:-.B.dn_chr3R:9522164:9522490:-@chr3R:9521925:9522068:-.B.up'	(0,0):19,(1,0):2,(1,1):8	0.00694444	(0,0):22,(0,1):1,(1,1):27	0:2,1:26	chr3R	-	95219259521925	95224909522490
chr2R:10064117:10064196:+@chr2R:10065390:10065526:+	ri	0.71	0.3	0.98	0.16	0.09	0.25	0.55	26.09	'chr2R:10064117:10064196:+@chr2R:10065390:10065526:+.A.withRI','chr2R:10064117:10064196:+@chr2R:10065390:10065526:+.B.up_chr2R:10064117:10064196:+@chr2R:10065390:10065526:+.B.dn'	(0,0):67,(1,0):51,(1,1):2	0.0368056	(0,0):79,(0,1):10,(1,0):53,(1,1):4	0:53,1:14	chr2R	+	1006411710064110	1006552610065520
chrX:15241577:15241632:+@chrX:15241688:15242509:+	ri	0.89	0.6	1	0.32	0.06	0.69	0.57	9.94	'chrX:15241577:15241632:+@chrX:15241688:15242509:+.A.withRI','chrX:15241577:15241632:+@chrX:15241688:15242509:+.B.up_chrX:15241577:15241632:+@chrX:15241688:15242509:+.B.dn'	(0,0):7,(1,0):9,(1,1):39	0.0333333	(0,0):9,(1,0):1,(1,1):52	0:9,1:44	chrX	+	1524157715241570	1524250915242500
chr2L:14741521:14741722:-@chr2L:14737510:14737548:-	ri	0.83	0.59	0.98	0.2	0.11	0.37	0.63	40915.8	'chr2L:14741521:14741722:-@chr2L:14737510:14737548:-.A.withRI','chr2L:14741521:14741722:-@chr2L:14737510:14737548:-.B.dn_chr2L:14741521:14741722:-@chr2L:14737510:14737548:-.B.up'	(0,0):310,(0,1):1,(1,0):425	0:425,1:1	(0,0):261,(1,0):144,(1,1):13	0:147,1:10	chr2L	-	1473751014737510	1474172214741720
chr2R:12914830:12914940:+@chr2R:12916178:12916526:+	ri	0.97	0.93	1	0.26	0.19	0.34	0.71	1000000000000	'chr2R:12914830:12914940:+@chr2R:12916178:12916526:+.A.withRI','chr2R:12914830:12914940:+@chr2R:12916178:12916526:+.B.up_chr2R:12914830:12914940:+@chr2R:12916178:12916526:+.B.dn'	(0,0):62,(0,1):1,(1,0):802,(1,1):82	0:883,1:2	(0,0):77,(1,0):103,(1,1):88	0:130,1:61	chr2R	+	1291483012914830	1291652612916520
chr2R:12914830:12914844:+@chr2R:12916178:12916526:+	ri	0.84	0.73	0.94	0.13	0.1	0.17	0.71	1000000000000	'chr2R:12914830:12914844:+@chr2R:12916178:12916526:+.A.withRI','chr2R:12914830:12914844:+@chr2R:12916178:12916526:+.B.up_chr2R:12914830:12914844:+@chr2R:12916178:12916526:+.B.dn'	(0,0):58,(0,1):5,(1,0):803,(1,1):81	0:872,1:17	(0,0):68,(0,1):9,(1,0):103,(1,1):88	0:113,1:87	chr2R	+	1291483012914830	1291652612916520
chrX:3083702:3138887|3083844:+@chrX:3139106:3140228:+	a5ss	0.17	0.14	0.21	0.37	0.31	0.44	-0.2	1000000000000	'chrX:3083702:3138887|3083844:+@chrX:3139106:3140228:+.A.coreAndExt_chrX:3083702:3138887|3083844:+@chrX:3139106:3140228:+.A.dn','chrX:3083702:3138887|3083844:+@chrX:3139106:3140228:+.B.core_chrX:3083702:3138887|3083844:+@chrX:3139106:3140228:+.B.dn'	(0,0):33,(0,1):2,(1,0):866,(1,1):97	0:886,1:79	(0,0):58,(0,1):3,(1,0):2497,(1,1):129	0:2549,1:80	chrX	+	30837023083702	31402283140228
chrX:3083702:3138890|3083844:+@chrX:3139106:3140228:+	a5ss	0.17	0.14	0.21	0.37	0.31	0.43	-0.2	1000000000000	'chrX:3083702:3138890|3083844:+@chrX:3139106:3140228:+.A.coreAndExt_chrX:3083702:3138890|3083844:+@chrX:3139106:3140228:+.A.dn','chrX:3083702:3138890|3083844:+@chrX:3139106:3140228:+.B.core_chrX:3083702:3138890|3083844:+@chrX:3139106:3140228:+.B.dn'	(0,0):35,(0,1):2,(1,0):864,(1,1):97	0:881,1:82	(0,0):66,(0,1):3,(1,0):2489,(1,1):129	0:2537,1:84	chrX	+	30837023083702	31402283140228
chr2L:7998934:7999169|7998997:+@chr2L:7999249:7999743:+	a5ss	0.81	0.74	0.87	0.99	0.98	1	-0.18	1000000000000	'chr2L:7998934:7999169|7998997:+@chr2L:7999249:7999743:+.A.coreAndExt_chr2L:7998934:7999169|7998997:+@chr2L:7999249:7999743:+.A.dn','chr2L:7998934:7999169|7998997:+@chr2L:7999249:7999743:+.B.core_chr2L:7998934:7999169|7998997:+@chr2L:7999249:7999743:+.B.dn'	(0,0):455,(1,0):673,(1,1):1749	0:2111,1:311	(0,0):534,(1,0):1201,(1,1):2047	0:3234,1:14	chr2L	+	79989347998934	79997437999743
chr2L:6669764:6674228|6670513:+@chr2L:6674301:6674525:+	a5ss	0.95	0.93	0.96	0.83	0.8	0.86	0.12	1000000000000	'chr2L:6669764:6674228|6670513:+@chr2L:6674301:6674525:+.A.coreAndExt_chr2L:6669764:6674228|6670513:+@chr2L:6674301:6674525:+.A.dn','chr2L:6669764:6674228|6670513:+@chr2L:6674301:6674525:+.B.core_chr2L:6669764:6674228|6670513:+@chr2L:6674301:6674525:+.B.dn'	(0,0):79,(0,1):29,(1,0):3668,(1,1):138	0:3801,1:34	(0,0):91,(0,1):73,(1,0):3320,(1,1):313	0:3578,1:128	chr2L	+	66697646669764	66745256674525
chr2L:19908939:19918585|19910432:+@chr2L:19925383:19925942:+	a5ss	0.27	0.21	0.32	0.72	0.65	0.8	-0.45	1000000000000	'chr2L:19908939:19918585|19910432:+@chr2L:19925383:19925942:+.A.coreAndExt_chr2L:19908939:19918585|19910432:+@chr2L:19925383:19925942:+.A.dn','chr2L:19908939:19918585|19910432:+@chr2L:19925383:19925942:+.B.core_chr2L:19908939:19918585|19910432:+@chr2L:19925383:19925942:+.B.dn'	(0,0):125,(0,1):15,(1,0):179,(1,1):130	0:210,1:114	(0,0):246,(0,1):16,(1,0):857,(1,1):201	0:982,1:92	chr2L	+	1990893919908930	1992594219925940
chr3R:25703649:25727787|25705532:+@chr3R:25727906:25728714:+	a5ss	0.17	0.15	0.19	0.29	0.27	0.31	-0.12	1000000000000	'chr3R:25703649:25727787|25705532:+@chr3R:25727906:25728714:+.A.coreAndExt_chr3R:25703649:25727787|25705532:+@chr3R:25727906:25728714:+.A.dn','chr3R:25703649:25727787|25705532:+@chr3R:25727906:25728714:+.B.core_chr3R:25703649:25727787|25705532:+@chr3R:25727906:25728714:+.B.dn'	(0,0):160,(1,0):1007,(1,1):659	0:1097,1:569	(0,0):234,(0,1):1,(1,0):2450,(1,1):943	0:2720,1:674	chr3R	+	2570364925703640	2572871425728710
chr3R:5180647:5183457|5180805:+@chr3R:5183706:5183898:+	a5ss	0.07	0.06	0.07	0.11	0.1	0.12	-0.04	1000000000000	'chr3R:5180647:5183457|5180805:+@chr3R:5183706:5183898:+.A.coreAndExt_chr3R:5180647:5183457|5180805:+@chr3R:5183706:5183898:+.A.dn','chr3R:5180647:5183457|5180805:+@chr3R:5183706:5183898:+.B.core_chr3R:5180647:5183457|5180805:+@chr3R:5183706:5183898:+.B.dn'	(0,0):282,(0,1):327,(1,0):609,(1,1):158	0:624,1:470	(0,0):391,(0,1):386,(1,0):1182,(1,1):196	0:1209,1:555	chr3R	+	51806475180647	51838985183898
chr2R:16981261:16987570|16981417:+@chr2R:16987720:16988996:+	a5ss	0.25	0.19	0.32	0.09	0.07	0.1	0.16	1.12569e+10	'chr2R:16981261:16987570|16981417:+@chr2R:16987720:16988996:+.A.coreAndExt_chr2R:16981261:16987570|16981417:+@chr2R:16987720:16988996:+.A.dn','chr2R:16981261:16987570|16981417:+@chr2R:16987720:16988996:+.B.core_chr2R:16981261:16987570|16981417:+@chr2R:16987720:16988996:+.B.dn'	(0,0):11,(0,1):7,(1,0):131,(1,1):98	0:156,1:80	(0,0):50,(0,1):57,(1,0):176,(1,1):333	0:200,1:366	chr2R	+	1698126116981260	1698899616988990
chr3L:9806947:9807061|9807022:+@chr3L:9813380:9813659:+	a5ss	0.71	0.4	0.96	0.05	0.01	0.16	0.66	2.26605e+06	'chr3L:9806947:9807061|9807022:+@chr3L:9813380:9813659:+.A.coreAndExt_chr3L:9806947:9807061|9807022:+@chr3L:9813380:9813659:+.A.dn','chr3L:9806947:9807061|9807022:+@chr3L:9813380:9813659:+.B.core_chr3L:9806947:9807061|9807022:+@chr3L:9813380:9813659:+.B.dn'	(0,0):306,(1,0):10,(1,1):60	0:35,1:35	(0,0):456,(0,1):4,(1,1):98	0:1,1:101	chr3L	+	98069479806947	98136599813659
chr3R:10494717:10494588|10493463:-@chr3R:10490677:10493377:-	a5ss	0.35	0.31	0.39	0.49	0.45	0.54	-0.14	986943	'chr3R:10494717:10494588|10493463:-@chr3R:10490677:10493377:-.A.dn_chr3R:10494717:10494588|10493463:-@chr3R:10490677:10493377:-.A.coreAndExt','chr3R:10494717:10494588|10493463:-@chr3R:10490677:10493377:-.B.dn_chr3R:10494717:10494588|10493463:-@chr3R:10490677:10493377:-.B.core'	(0,0):74,(0,1):66,(1,0):277,(1,1):1523	0:783,1:1083	(0,0):90,(0,1):70,(1,0):488,(1,1):1854	0:1389,1:1023	chr3R	-	1049067710490670	1049471710494710
chr3R:10494717:10494588|10494081:-@chr3R:10490677:10493377:-	a5ss	0.33	0.28	0.39	0.51	0.46	0.57	-0.18	764871	'chr3R:10494717:10494588|10494081:-@chr3R:10490677:10493377:-.A.dn_chr3R:10494717:10494588|10494081:-@chr3R:10490677:10493377:-.A.coreAndExt','chr3R:10494717:10494588|10494081:-@chr3R:10490677:10493377:-.B.dn_chr3R:10494717:10494588|10494081:-@chr3R:10490677:10493377:-.B.core'	(0,0):214,(0,1):66,(1,0):137,(1,1):1523	0:619,1:1107	(0,0):308,(0,1):70,(1,0):270,(1,1):1854	0:1236,1:958	chr3R	-	1049067710490670	1049471710494710
chr3L:20185128:20183758|20178063:-@chr3L:20161792:20162163:-	a5ss	0.75	0.65	0.86	0.48	0.42	0.54	0.27	275518	'chr3L:20185128:20183758|20178063:-@chr3L:20161792:20162163:-.A.dn_chr3L:20185128:20183758|20178063:-@chr3L:20161792:20162163:-.A.coreAndExt','chr3L:20185128:20183758|20178063:-@chr3L:20161792:20162163:-.B.dn_chr3L:20185128:20183758|20178063:-@chr3L:20161792:20162163:-.B.core'	(0,0):465,(0,1):1,(1,0):563,(1,1):201	0:719,1:46	(0,0):531,(0,1):2,(1,0):646,(1,1):366	0:822,1:192	chr3L	-	2016179220161790	2018512820185120
chr2L:14741722:14741521|14741509:-@chr2L:14737445:14737494:-	a5ss	0.8	0.51	0.97	0.04	0	0.11	0.76	267238	'chr2L:14741722:14741521|14741509:-@chr2L:14737445:14737494:-.A.dn_chr2L:14741722:14741521|14741509:-@chr2L:14737445:14737494:-.A.coreAndExt','chr2L:14741722:14741521|14741509:-@chr2L:14737445:14737494:-.B.dn_chr2L:14741722:14741521|14741509:-@chr2L:14737445:14737494:-.B.core'	(0,0):604,(1,0):3,(1,1):13	0:13,1:3	(0,0):327,(0,1):32,(1,1):4	0:0,1:36	chr2L	-	1473744514737440	1474172214741720
chr2L:16821110:16820943|16803957:-@chr2L:16803271:16803675:-	a5ss	0.53	0.38	0.69	0.18	0.15	0.22	0.35	110773	'chr2L:16821110:16820943|16803957:-@chr2L:16803271:16803675:-.A.dn_chr2L:16821110:16820943|16803957:-@chr2L:16803271:16803675:-.A.coreAndExt','chr2L:16821110:16820943|16803957:-@chr2L:16803271:16803675:-.B.dn_chr2L:16821110:16820943|16803957:-@chr2L:16803271:16803675:-.B.core'	(0,0):195,(0,1):8,(1,0):559,(1,1):8	0:564,1:11	(0,0):227,(0,1):49,(1,0):868,(1,1):47	0:875,1:89	chr2L	-	1680327116803270	1682111016821110
chr2R:12037642:12050788|12038570:+@chr2R:12051592:12052618:+	a5ss	0.66	0.57	0.76	0.95	0.91	0.98	-0.29	60483.7	'chr2R:12037642:12050788|12038570:+@chr2R:12051592:12052618:+.A.coreAndExt_chr2R:12037642:12050788|12038570:+@chr2R:12051592:12052618:+.A.dn','chr2R:12037642:12050788|12038570:+@chr2R:12051592:12052618:+.B.core_chr2R:12037642:12050788|12038570:+@chr2R:12051592:12052618:+.B.dn'	(0,0):48,(0,1):6,(1,0):709,(1,1):134	0:812,1:37	(0,0):127,(0,1):5,(1,0):1847,(1,1):151	0:1985,1:18	chr2R	+	1203764212037640	1205261812052610
chr3R:26842569:26841898|26803165:-@chr3R:26794728:26797669:-	a5ss	0.28	0.22	0.35	0.55	0.44	0.65	-0.27	60273.2	'chr3R:26842569:26841898|26803165:-@chr3R:26794728:26797669:-.A.dn_chr3R:26842569:26841898|26803165:-@chr3R:26794728:26797669:-.A.coreAndExt','chr3R:26842569:26841898|26803165:-@chr3R:26794728:26797669:-.B.dn_chr3R:26842569:26841898|26803165:-@chr3R:26794728:26797669:-.B.core'	(0,0):11,(0,1):3,(1,0):273,(1,1):83	0:287,1:72	(0,0):16,(0,1):7,(1,0):605,(1,1):83	0:644,1:51	chr3R	-	2679472826794720	2684256926842560
chr3R:4646441:4646265|4645249:-@chr3R:4643363:4644985:-	a5ss	0.68	0.6	0.76	0.93	0.85	0.99	-0.25	58688.2	'chr3R:4646441:4646265|4645249:-@chr3R:4643363:4644985:-.A.dn_chr3R:4646441:4646265|4645249:-@chr3R:4643363:4644985:-.A.coreAndExt','chr3R:4646441:4646265|4645249:-@chr3R:4643363:4644985:-.B.dn_chr3R:4646441:4646265|4645249:-@chr3R:4643363:4644985:-.B.core'	(0,0):241,(0,1):3,(1,0):437,(1,1):997	0:1119,1:318	(0,0):248,(1,0):512,(1,1):855	0:1331,1:36	chr3R	-	46433634643363	46464414646441
chr3R:41034:40868|31899:-@chr3R:30207:31507:-	a5ss	0.84	0.81	0.87	0.92	0.9	0.94	-0.08	45197.9	'chr3R:41034:40868|31899:-@chr3R:30207:31507:-.A.dn_chr3R:41034:40868|31899:-@chr3R:30207:31507:-.A.coreAndExt','chr3R:41034:40868|31899:-@chr3R:30207:31507:-.B.dn_chr3R:41034:40868|31899:-@chr3R:30207:31507:-.B.core'	(0,0):55,(0,1):60,(1,0):5188,(1,1):459	0:5563,1:144	(0,0):63,(0,1):40,(1,0):6492,(1,1):390	0:6856,1:66	chr3R	-	3020730207	4103441034
chr2L:12027439:12028259|12027821:+@chr2L:12031893:12032071:+	a5ss	0.05	0.04	0.07	0.1	0.08	0.12	-0.05	6176.47	'chr2L:12027439:12028259|12027821:+@chr2L:12031893:12032071:+.A.coreAndExt_chr2L:12027439:12028259|12027821:+@chr2L:12031893:12032071:+.A.dn','chr2L:12027439:12028259|12027821:+@chr2L:12031893:12032071:+.B.core_chr2L:12027439:12028259|12027821:+@chr2L:12031893:12032071:+.B.dn'	(0,0):347,(0,1):389,(1,0):96,(1,1):734	0:132,1:1087	(0,0):214,(0,1):192,(1,0):93,(1,1):381	0:126,1:540	chr2L	+	1202743912027430	1203207112032070
chr2L:6664931:6668134|6665791:+@chr2L:6668342:6668887:+	a5ss	0.22	0.17	0.27	0.11	0.09	0.13	0.11	4394.77	'chr2L:6664931:6668134|6665791:+@chr2L:6668342:6668887:+.A.coreAndExt_chr2L:6664931:6668134|6665791:+@chr2L:6668342:6668887:+.A.dn','chr2L:6664931:6668134|6665791:+@chr2L:6668342:6668887:+.B.core_chr2L:6664931:6668134|6665791:+@chr2L:6668342:6668887:+.B.dn'	(0,0):62,(0,1):23,(1,0):102,(1,1):202	0:146,1:181	(0,0):77,(0,1):59,(1,0):125,(1,1):497	0:182,1:499	chr2L	+	66649316664931	66688876668887
chr3L:12197320:12196819|12195885:-@chr3L:12194879:12194962:-	a5ss	0.15	0.1	0.23	0.03	0.01	0.06	0.12	2188.92	'chr3L:12197320:12196819|12195885:-@chr3L:12194879:12194962:-.A.dn_chr3L:12197320:12196819|12195885:-@chr3L:12194879:12194962:-.A.coreAndExt','chr3L:12197320:12196819|12195885:-@chr3L:12194879:12194962:-.B.dn_chr3L:12197320:12196819|12195885:-@chr3L:12194879:12194962:-.B.core'	(0,0):43,(0,1):14,(1,0):26,(1,1):52	0:38,1:54	(0,0):18,(0,1):4,(1,0):5,(1,1):87	0:6,1:90	chr3L	-	1219487912194870	1219732012197320
chr2R:11228061:11237027|11228108:+@chr2R:11237568:11238099:+	a5ss	0.02	0.02	0.03	0.06	0.05	0.08	-0.04	1583.86	'chr2R:11228061:11237027|11228108:+@chr2R:11237568:11238099:+.A.coreAndExt_chr2R:11228061:11237027|11228108:+@chr2R:11237568:11238099:+.A.dn','chr2R:11228061:11237027|11228108:+@chr2R:11237568:11238099:+.B.core_chr2R:11228061:11237027|11228108:+@chr2R:11237568:11238099:+.B.dn'	(0,0):27,(1,0):76,(1,1):141	0:81,1:136	(0,0):34,(1,0):169,(1,1):124	0:178,1:115	chr2R	+	1122806111228060	1123809911238090
chr3R:26842569:26841898|26803169:-@chr3R:26794728:26797669:-	a5ss	0.29	0.22	0.36	0.55	0.45	0.66	-0.26	853.52	'chr3R:26842569:26841898|26803169:-@chr3R:26794728:26797669:-.A.dn_chr3R:26842569:26841898|26803169:-@chr3R:26794728:26797669:-.A.coreAndExt','chr3R:26842569:26841898|26803169:-@chr3R:26794728:26797669:-.B.dn_chr3R:26842569:26841898|26803169:-@chr3R:26794728:26797669:-.B.core'	(0,0):11,(0,1):3,(1,0):273,(1,1):83	0:296,1:63	(0,0):15,(0,1):7,(1,0):606,(1,1):83	0:657,1:39	chr3R	-	2679472826794720	2684256926842560
chr2RHet:1005109:1004931|989074:-@chr2RHet:862036:862303:-	a5ss	0.16	0.12	0.24	0.53	0.33	0.78	-0.37	320.62	'chr2RHet:1005109:1004931|989074:-@chr2RHet:862036:862303:-.A.dn_chr2RHet:1005109:1004931|989074:-@chr2RHet:862036:862303:-.A.coreAndExt','chr2RHet:1005109:1004931|989074:-@chr2RHet:862036:862303:-.B.dn_chr2RHet:1005109:1004931|989074:-@chr2RHet:862036:862303:-.B.core'	(0,0):2803,(1,0):308,(1,1):32	0:319,1:21	(0,0):3253,(0,1):2,(1,0):464,(1,1):11	0:469,1:8	chr2RHet	-	862036862036	10051091005109
chr2L:8159595:8159219|8143989:-@chr2L:8140500:8140778:-	a5ss	0.55	0.45	0.67	0.28	0.23	0.35	0.27	317.23	'chr2L:8159595:8159219|8143989:-@chr2L:8140500:8140778:-.A.dn_chr2L:8159595:8159219|8143989:-@chr2L:8140500:8140778:-.A.coreAndExt','chr2L:8159595:8159219|8143989:-@chr2L:8140500:8140778:-.B.dn_chr2L:8159595:8159219|8143989:-@chr2L:8140500:8140778:-.B.core'	(0,0):226,(0,1):12,(1,0):947,(1,1):25	0:959,1:25	(0,0):178,(0,1):19,(1,0):791,(1,1):60	0:808,1:62	chr2L	-	81405008140500	81595958159595
chr4:144518:144411|144407:-@chr4:142935:144048:-	a5ss	0.09	0.04	0.14	0.01	0	0.03	0.08	208.21	'chr4:144518:144411|144407:-@chr4:142935:144048:-.A.dn_chr4:144518:144411|144407:-@chr4:142935:144048:-.A.coreAndExt','chr4:144518:144411|144407:-@chr4:142935:144048:-.B.dn_chr4:144518:144411|144407:-@chr4:142935:144048:-.B.core'	(0,0):132,(0,1):98,(1,0):9,(1,1):1290	0:103,1:1294	(0,0):162,(0,1):129,(1,1):1472	0:11,1:1590	chr4	-	142935142935	144518144518
chr3L:14206189:14219830|14206303:+@chr3L:14223276:14223410:+	a5ss	0.11	0.09	0.14	0.23	0.18	0.29	-0.12	185.67	'chr3L:14206189:14219830|14206303:+@chr3L:14223276:14223410:+.A.coreAndExt_chr3L:14206189:14219830|14206303:+@chr3L:14223276:14223410:+.A.dn','chr3L:14206189:14219830|14206303:+@chr3L:14223276:14223410:+.B.core_chr3L:14206189:14219830|14206303:+@chr3L:14223276:14223410:+.B.dn'	(0,0):265,(0,1):52,(1,0):1292,(1,1):3	0:1292,1:55	(0,0):367,(0,1):34,(1,0):2051,(1,1):4	0:2051,1:38	chr3L	+	1420618914206180	1422341014223410
chr2L:13027744:13027371|13026529:-@chr2L:13022941:13025497:-	a5ss	0.45	0.4	0.52	0.66	0.58	0.75	-0.21	155.89	'chr2L:13027744:13027371|13026529:-@chr2L:13022941:13025497:-.A.dn_chr2L:13027744:13027371|13026529:-@chr2L:13022941:13025497:-.A.coreAndExt','chr2L:13027744:13027371|13026529:-@chr2L:13022941:13025497:-.B.dn_chr2L:13027744:13027371|13026529:-@chr2L:13022941:13025497:-.B.core'	(0,0):174,(0,1):15,(1,0):222,(1,1):1473	0:837,1:873	(0,0):133,(0,1):2,(1,0):255,(1,1):1224	0:1080,1:401	chr2L	-	1302294113022940	1302774413027740
chr2R:18070443:18070328|18066123:-@chr2R:18064876:18066001:-	a5ss	0.87	0.65	0.99	0.41	0.28	0.57	0.46	89.75	'chr2R:18070443:18070328|18066123:-@chr2R:18064876:18066001:-.A.dn_chr2R:18070443:18070328|18066123:-@chr2R:18064876:18066001:-.A.coreAndExt','chr2R:18070443:18070328|18066123:-@chr2R:18064876:18066001:-.B.dn_chr2R:18070443:18070328|18066123:-@chr2R:18064876:18066001:-.B.core'	(0,0):31,(1,0):153,(1,1):40	0:191,1:2	(0,0):18,(1,0):77,(1,1):48	0:99,1:26	chr2R	-	1806487618064870	1807044318070440
chr2L:870470:871274|870552:+@chr2L:871341:871576:+	a5ss	0.23	0.19	0.29	0.4	0.34	0.47	-0.17	86.1	'chr2L:870470:871274|870552:+@chr2L:871341:871576:+.A.coreAndExt_chr2L:870470:871274|870552:+@chr2L:871341:871576:+.A.dn','chr2L:870470:871274|870552:+@chr2L:871341:871576:+.B.core_chr2L:870470:871274|870552:+@chr2L:871341:871576:+.B.dn'	(0,0):38,(0,1):46,(1,0):195,(1,1):72	0:220,1:93	(0,0):59,(0,1):36,(1,0):302,(1,1):61	0:325,1:74	chr2L	+	870470870470	871576871576
chr3L:4174726:4191886|4174842:+@chr3L:4192192:4192968:+	a5ss	0.19	0.15	0.25	0.11	0.09	0.13	0.08	83.03	'chr3L:4174726:4191886|4174842:+@chr3L:4192192:4192968:+.A.coreAndExt_chr3L:4174726:4191886|4174842:+@chr3L:4192192:4192968:+.A.dn','chr3L:4174726:4191886|4174842:+@chr3L:4192192:4192968:+.B.core_chr3L:4174726:4191886|4174842:+@chr3L:4192192:4192968:+.B.dn'	(0,0):37,(0,1):6,(1,0):314,(1,1):60	0:321,1:59	(0,0):47,(0,1):12,(1,0):428,(1,1):152	0:446,1:146	chr3L	+	41747264174726	41929684192968
chr3L:14206189:14219503|14206303:+@chr3L:14223276:14223410:+	a5ss	0.11	0.09	0.14	0.23	0.18	0.3	-0.12	75.89	'chr3L:14206189:14219503|14206303:+@chr3L:14223276:14223410:+.A.coreAndExt_chr3L:14206189:14219503|14206303:+@chr3L:14223276:14223410:+.A.dn','chr3L:14206189:14219503|14206303:+@chr3L:14223276:14223410:+.B.core_chr3L:14206189:14219503|14206303:+@chr3L:14223276:14223410:+.B.dn'	(0,0):262,(0,1):52,(1,0):1295,(1,1):3	0:1295,1:55	(0,0):355,(0,1):34,(1,0):2063,(1,1):4	0:2064,1:37	chr3L	+	1420618914206180	1422341014223410
chrX:15885968:15885926|15885855:-@chrX:15885116:15885415:-	a5ss	0.85	0.74	0.95	0.56	0.42	0.69	0.29	54.51	'chrX:15885968:15885926|15885855:-@chrX:15885116:15885415:-.A.dn_chrX:15885968:15885926|15885855:-@chrX:15885116:15885415:-.A.coreAndExt','chrX:15885968:15885926|15885855:-@chrX:15885116:15885415:-.B.dn_chrX:15885968:15885926|15885855:-@chrX:15885116:15885415:-.B.core'	(0,0):138,(0,1):4,(1,0):72,(1,1):72	0:132,1:16	(0,0):154,(0,1):12,(1,0):48,(1,1):92	0:96,1:56	chrX	-	1588511615885110	1588596815885960
chr3L:14206189:14223206|14206303:+@chr3L:14223276:14223410:+	a5ss	0.1	0.07	0.12	0.2	0.15	0.25	-0.1	49.98	'chr3L:14206189:14223206|14206303:+@chr3L:14223276:14223410:+.A.coreAndExt_chr3L:14206189:14223206|14206303:+@chr3L:14223276:14223410:+.A.dn','chr3L:14206189:14223206|14206303:+@chr3L:14223276:14223410:+.B.core_chr3L:14206189:14223206|14206303:+@chr3L:14223276:14223410:+.B.dn'	(0,0):163,(0,1):52,(1,0):1394,(1,1):3	0:1394,1:55	(0,0):272,(0,1):34,(1,0):2146,(1,1):4	0:2147,1:37	chr3L	+	1420618914206180	1422341014223410
chrX:7840252:7839929|7837717:-@chrX:7836542:7837260:-	a5ss	0.21	0.19	0.23	0.15	0.14	0.17	0.06	32.67	'chrX:7840252:7839929|7837717:-@chrX:7836542:7837260:-.A.dn_chrX:7840252:7839929|7837717:-@chrX:7836542:7837260:-.A.coreAndExt','chrX:7840252:7839929|7837717:-@chrX:7836542:7837260:-.B.dn_chrX:7840252:7839929|7837717:-@chrX:7836542:7837260:-.B.core'	(0,0):129,(0,1):125,(1,0):450,(1,1):613	0:560,1:628	(0,0):219,(0,1):235,(1,0):562,(1,1):1019	0:716,1:1100	chrX	-	78365427836542	78402527840252
chr2RHet:1005109:1004931|862915:-@chr2RHet:862036:862303:-	a5ss	0.18	0.12	0.25	0.5	0.32	0.74	-0.32	30.37	'chr2RHet:1005109:1004931|862915:-@chr2RHet:862036:862303:-.A.dn_chr2RHet:1005109:1004931|862915:-@chr2RHet:862036:862303:-.A.coreAndExt','chr2RHet:1005109:1004931|862915:-@chr2RHet:862036:862303:-.B.dn_chr2RHet:1005109:1004931|862915:-@chr2RHet:862036:862303:-.B.core'	(0,0):92,(1,0):3019,(1,1):32	0:3025,1:26	(0,0):61,(0,1):2,(1,0):3656,(1,1):11	0:3662,1:7	chr2RHet	-	862036862036	10051091005109
chr2L:8252377:8252228|8245740:-@chr2L:8244970:8245223:-	a5ss	0.11	0.06	0.17	0.03	0.02	0.04	0.08	28.89	'chr2L:8252377:8252228|8245740:-@chr2L:8244970:8245223:-.A.dn_chr2L:8252377:8252228|8245740:-@chr2L:8244970:8245223:-.A.coreAndExt','chr2L:8252377:8252228|8245740:-@chr2L:8244970:8245223:-.B.dn_chr2L:8252377:8252228|8245740:-@chr2L:8244970:8245223:-.B.core'	(0,0):26,(0,1):9,(1,0):57,(1,1):9	0:59,1:16	(0,0):18,(0,1):29,(1,0):45,(1,1):20	0:47,1:47	chr2L	-	82449708244970	82523778252377
chr2L:5766199:5765961|5764332:-@chr2L:5763460:5764271:-	a5ss	0.05	0.04	0.06	0.11	0.08	0.15	-0.06	21.91	'chr2L:5766199:5765961|5764332:-@chr2L:5763460:5764271:-.A.dn_chr2L:5766199:5765961|5764332:-@chr2L:5763460:5764271:-.A.coreAndExt','chr2L:5766199:5765961|5764332:-@chr2L:5763460:5764271:-.B.dn_chr2L:5766199:5765961|5764332:-@chr2L:5763460:5764271:-.B.core'	(0,0):57,(0,1):186,(1,0):101,(1,1):702	0:137,1:852	(0,0):18,(0,1):40,(1,0):48,(1,1):156	0:66,1:178	chr2L	-	57634605763460	57661995766199
chr3R:254925:254697|254272:-@chr3R:252604:252722:-	a5ss	0.12	0.06	0.21	0.46	0.25	0.69	-0.34	21.84	'chr3R:254925:254697|254272:-@chr3R:252604:252722:-.A.dn_chr3R:254925:254697|254272:-@chr3R:252604:252722:-.A.coreAndExt','chr3R:254925:254697|254272:-@chr3R:252604:252722:-.B.dn_chr3R:254925:254697|254272:-@chr3R:252604:252722:-.B.core'	(0,0):154,(0,1):16,(1,0):10,(1,1):12	0:11,1:27	(0,0):328,(0,1):4,(1,0):17,(1,1):5	0:22,1:4	chr3R	-	252604252604	254925254925
chr2L:12027439:12028580|12027821:+@chr2L:12031893:12032071:+	a5ss	0.05	0.04	0.06	0.08	0.07	0.1	-0.03	20.93	'chr2L:12027439:12028580|12027821:+@chr2L:12031893:12032071:+.A.coreAndExt_chr2L:12027439:12028580|12027821:+@chr2L:12031893:12032071:+.A.dn','chr2L:12027439:12028580|12027821:+@chr2L:12031893:12032071:+.B.core_chr2L:12027439:12028580|12027821:+@chr2L:12031893:12032071:+.B.dn'	(0,0):309,(0,1):389,(1,0):134,(1,1):734	0:172,1:1085	(0,0):192,(0,1):192,(1,0):115,(1,1):381	0:138,1:550	chr2L	+	1202743912027430	1203207112032070
chr2R:9782097:9781635|9771600:-@chr2R:9769906:9770052:-	a5ss	0.9	0.82	0.96	0.69	0.6	0.78	0.21	17.72	'chr2R:9782097:9781635|9771600:-@chr2R:9769906:9770052:-.A.dn_chr2R:9782097:9781635|9771600:-@chr2R:9769906:9770052:-.A.coreAndExt','chr2R:9782097:9781635|9771600:-@chr2R:9769906:9770052:-.B.dn_chr2R:9782097:9781635|9771600:-@chr2R:9769906:9770052:-.B.core'	(0,0):150,(0,1):4,(1,0):2401,(1,1):64	0:2452,1:17	(0,0):135,(0,1):16,(1,0):2165,(1,1):80	0:2214,1:47	chr2R	-	97699069769906	97820979782097
chr2R:9332199:9331933|9331166:-@chr2R:9330439:9330633:-	a5ss	0.07	0.05	0.1	0.15	0.12	0.19	-0.08	16.69	'chr2R:9332199:9331933|9331166:-@chr2R:9330439:9330633:-.A.dn_chr2R:9332199:9331933|9331166:-@chr2R:9330439:9330633:-.A.coreAndExt','chr2R:9332199:9331933|9331166:-@chr2R:9330439:9330633:-.B.dn_chr2R:9332199:9331933|9331166:-@chr2R:9330439:9330633:-.B.core'	(0,0):156,(0,1):82,(1,0):39,(1,1):65	0:41,1:145	(0,0):342,(0,1):100,(1,0):112,(1,1):103	0:126,1:189	chr2R	-	93304399330439	93321999332199
chr3R:8521845:8522391|8522021:+@chr3R:8522446:8522753:+	a5ss	0.22	0.15	0.31	0.07	0.03	0.12	0.15	15.19	'chr3R:8521845:8522391|8522021:+@chr3R:8522446:8522753:+.A.coreAndExt_chr3R:8521845:8522391|8522021:+@chr3R:8522446:8522753:+.A.dn','chr3R:8521845:8522391|8522021:+@chr3R:8522446:8522753:+.B.core_chr3R:8521845:8522391|8522021:+@chr3R:8522446:8522753:+.B.dn'	(0,0):40,(0,1):24,(1,0):31,(1,1):60	0:46,1:69	(0,0):32,(0,1):36,(1,0):10,(1,1):56	0:17,1:85	chr3R	+	85218458521845	85227538522753
chr3R:2988718:2989032|2988762:+@chr3R:2989844:2990077:+	a5ss	0.36	0.2	0.55	0.1	0.04	0.19	0.26	13.51	'chr3R:2988718:2989032|2988762:+@chr3R:2989844:2990077:+.A.coreAndExt_chr3R:2988718:2989032|2988762:+@chr3R:2989844:2990077:+.A.dn','chr3R:2988718:2989032|2988762:+@chr3R:2989844:2990077:+.B.core_chr3R:2988718:2989032|2988762:+@chr3R:2989844:2990077:+.B.dn'	(0,0):127,(0,1):3,(1,0):25,(1,1):20	0:32,1:16	(0,0):128,(0,1):4,(1,0):7,(1,1):24	0:10,1:25	chr3R	+	29887182988718	29900772990077
chr3R:1242427:1262782|1242620:+@chr3R:1262858:1263130:+	a5ss	0.16	0.09	0.25	0.52	0.28	0.84	-0.36	13.48	'chr3R:1242427:1262782|1242620:+@chr3R:1262858:1263130:+.A.coreAndExt_chr3R:1242427:1262782|1242620:+@chr3R:1262858:1263130:+.A.dn','chr3R:1242427:1262782|1242620:+@chr3R:1262858:1263130:+.B.core_chr3R:1242427:1262782|1242620:+@chr3R:1262858:1263130:+.B.dn'	(0,0):2,(0,1):5,(1,0):121,(1,1):6	0:121,1:11	(0,0):9,(0,1):2,(1,0):289,(1,1):4	0:289,1:6	chr3R	+	12424271242427	12631301263130
chr2L:9521219:9521476|9521246:+@chr2L:9523163:9523343:+	a5ss	0.27	0.18	0.38	0.55	0.39	0.76	-0.28	12.79	'chr2L:9521219:9521476|9521246:+@chr2L:9523163:9523343:+.A.coreAndExt_chr2L:9521219:9521476|9521246:+@chr2L:9523163:9523343:+.A.dn','chr2L:9521219:9521476|9521246:+@chr2L:9523163:9523343:+.B.core_chr2L:9521219:9521476|9521246:+@chr2L:9523163:9523343:+.B.dn'	(0,0):166,(0,1):8,(1,0):56,(1,1):35	0:65,1:34	(0,0):253,(1,0):98,(1,1):42	0:118,1:22	chr2L	+	95212199521219	95233439523343
chr3R:6715056:6714795|6714788:-@chr3R:6713288:6714065:-	a5ss	0.74	0.61	0.87	0.95	0.87	0.99	-0.21	11.57	'chr3R:6715056:6714795|6714788:-@chr3R:6713288:6714065:-.A.dn_chr3R:6715056:6714795|6714788:-@chr3R:6713288:6714065:-.A.coreAndExt','chr3R:6715056:6714795|6714788:-@chr3R:6713288:6714065:-.B.dn_chr3R:6715056:6714795|6714788:-@chr3R:6713288:6714065:-.B.core'	(0,0):48,(0,1):8,(1,0):29,(1,1):315	0:283,1:69	(0,0):51,(0,1):2,(1,0):60,(1,1):399	0:423,1:38	chr3R	-	67132886713288	67150566715056
chr3L:9068164:9069895|9068722:+@chr3L:9069958:9070080:+	a5ss	0.28	0.22	0.34	0.17	0.13	0.21	0.11	10.03	'chr3L:9068164:9069895|9068722:+@chr3L:9069958:9070080:+.A.coreAndExt_chr3L:9068164:9069895|9068722:+@chr3L:9069958:9070080:+.A.dn','chr3L:9068164:9069895|9068722:+@chr3L:9069958:9070080:+.B.core_chr3L:9068164:9069895|9068722:+@chr3L:9069958:9070080:+.B.dn'	(0,0):74,(0,1):1,(1,0):131,(1,1):197	0:190,1:139	(0,0):68,(1,0):98,(1,1):248	0:140,1:206	chr3L	+	90681649068164	90700809070080
chr3R:2911079:2910687|2910663:-@chr3R:2910265:2910489:-	a5ss	0.64	0.45	0.83	0.93	0.79	1	-0.29	9.74	'chr3R:2911079:2910687|2910663:-@chr3R:2910265:2910489:-.A.dn_chr3R:2911079:2910687|2910663:-@chr3R:2910265:2910489:-.A.coreAndExt','chr3R:2911079:2910687|2910663:-@chr3R:2910265:2910489:-.B.dn_chr3R:2911079:2910687|2910663:-@chr3R:2910265:2910489:-.B.core'	(0,0):93,(0,1):4,(1,0):19,(1,1):134	0:111,1:46	(0,0):135,(1,0):27,(1,1):151	0.123611	chr3R	-	29102652910265	29110792911079
chr3R:6203494:6203413|6199725:-@chr3R:6198463:6198927:-	a5ss	0.33	0.14	0.62	0.05	0.02	0.1	0.28	9.22	'chr3R:6203494:6203413|6199725:-@chr3R:6198463:6198927:-.A.dn_chr3R:6203494:6203413|6199725:-@chr3R:6198463:6198927:-.A.coreAndExt','chr3R:6203494:6203413|6199725:-@chr3R:6198463:6198927:-.B.dn_chr3R:6203494:6203413|6199725:-@chr3R:6198463:6198927:-.B.core'	(0,0):7,(0,1):1,(1,0):18,(1,1):5	0:23,1:1	(0,0):7,(0,1):1,(1,0):8,(1,1):18	0:9,1:18	chr3R	-	61984636198463	62034946203494
chr3R:4841168:4841439|4841245:+@chr3R:4841506:4841990:+	a5ss	0.76	0.37	0.98	0.23	0.07	0.47	0.53	8.93	'chr3R:4841168:4841439|4841245:+@chr3R:4841506:4841990:+.A.coreAndExt_chr3R:4841168:4841439|4841245:+@chr3R:4841506:4841990:+.A.dn','chr3R:4841168:4841439|4841245:+@chr3R:4841506:4841990:+.B.core_chr3R:4841168:4841439|4841245:+@chr3R:4841506:4841990:+.B.dn'	(0,0):41,(1,0):10,(1,1):19	0:26,1:3	(0,0):50,(1,0):4,(1,1):51	0:11,1:44	chr3R	+	48411684841168	48419904841990
chr2L:8298340:8298071|8296441:-@chr2L:8284125:8284220:-	a5ss	0.23	0.15	0.35	0.1	0.07	0.13	0.13	8.9	'chr2L:8298340:8298071|8296441:-@chr2L:8284125:8284220:-.A.dn_chr2L:8298340:8298071|8296441:-@chr2L:8284125:8284220:-.A.coreAndExt','chr2L:8298340:8298071|8296441:-@chr2L:8284125:8284220:-.B.dn_chr2L:8298340:8298071|8296441:-@chr2L:8284125:8284220:-.B.core'	(0,0):115,(0,1):13,(1,0):55,(1,1):7	0:56,1:19	(0,0):251,(0,1):33,(1,0):59,(1,1):25	0:62,1:55	chr2L	-	82841258284125	82983408298340
chr2L:9521219:9521440|9521246:+@chr2L:9523163:9523343:+	a5ss	0.35	0.24	0.49	0.71	0.49	0.93	-0.36	7.9	'chr2L:9521219:9521440|9521246:+@chr2L:9523163:9523343:+.A.coreAndExt_chr2L:9521219:9521440|9521246:+@chr2L:9523163:9523343:+.A.dn','chr2L:9521219:9521440|9521246:+@chr2L:9523163:9523343:+.B.core_chr2L:9521219:9521440|9521246:+@chr2L:9523163:9523343:+.B.dn'	(0,0):158,(0,1):8,(1,0):64,(1,1):35	0:76,1:31	(0,0):241,(1,0):110,(1,1):42	0:145,1:7	chr2L	+	95212199521219	95233439523343
chr3R:8521845:8522382|8522021:+@chr3R:8522446:8522753:+	a5ss	0.25	0.17	0.34	0.08	0.04	0.14	0.17	7.86	'chr3R:8521845:8522382|8522021:+@chr3R:8522446:8522753:+.A.coreAndExt_chr3R:8521845:8522382|8522021:+@chr3R:8522446:8522753:+.A.dn','chr3R:8521845:8522382|8522021:+@chr3R:8522446:8522753:+.B.core_chr3R:8521845:8522382|8522021:+@chr3R:8522446:8522753:+.B.dn'	(0,0):36,(0,1):24,(1,0):35,(1,1):60	0:49,1:70	(0,0):30,(0,1):36,(1,0):12,(1,1):56	0:15,1:89	chr3R	+	85218458521845	85227538522753
chr2L:9521219:9521495|9521246:+@chr2L:9523163:9523343:+	a5ss	0.33	0.23	0.45	0.62	0.43	0.83	-0.29	7.62	'chr2L:9521219:9521495|9521246:+@chr2L:9523163:9523343:+.A.coreAndExt_chr2L:9521219:9521495|9521246:+@chr2L:9523163:9523343:+.A.dn','chr2L:9521219:9521495|9521246:+@chr2L:9523163:9523343:+.B.core_chr2L:9521219:9521495|9521246:+@chr2L:9523163:9523343:+.B.dn'	(0,0):146,(0,1):8,(1,0):76,(1,1):35	0:101,1:18	(0,0):229,(1,0):122,(1,1):42	0:155,1:9	chr2L	+	95212199521219	95233439523343
chr2RHet:391804:392278|391926:+@chr2RHet:392825:392979:+	a5ss	0.87	0.75	0.97	0.64	0.52	0.75	0.23	7.22	'chr2RHet:391804:392278|391926:+@chr2RHet:392825:392979:+.A.coreAndExt_chr2RHet:391804:392278|391926:+@chr2RHet:392825:392979:+.A.dn','chr2RHet:391804:392278|391926:+@chr2RHet:392825:392979:+.B.core_chr2RHet:391804:392278|391926:+@chr2RHet:392825:392979:+.B.dn'	(0,0):450,(0,1):2,(1,0):119,(1,1):6	0:125,1:2	(0,0):457,(0,1):12,(1,0):122,(1,1):7	0:127,1:14	chr2RHet	+	391804391804	392979392979
chrX:9148146:9148957|9148382:+@chrX:9149661:9149853:+	a5ss	0.62	0.56	0.68	0.76	0.69	0.82	-0.14	7.17	'chrX:9148146:9148957|9148382:+@chrX:9149661:9149853:+.A.coreAndExt_chrX:9148146:9148957|9148382:+@chrX:9149661:9149853:+.A.dn','chrX:9148146:9148957|9148382:+@chrX:9149661:9149853:+.B.core_chrX:9148146:9148957|9148382:+@chrX:9149661:9149853:+.B.dn'	(0,0):877,(0,1):60,(1,0):531,(1,1):124	0:597,1:118	(0,0):750,(0,1):27,(1,0):516,(1,1):120	0:607,1:56	chrX	+	91481469148146	91498539149853
chr3R:6203494:6203413|6200932:-@chr3R:6198463:6198927:-	a5ss	0.38	0.15	0.81	0.06	0.02	0.13	0.32	7.13	'chr3R:6203494:6203413|6200932:-@chr3R:6198463:6198927:-.A.dn_chr3R:6203494:6203413|6200932:-@chr3R:6198463:6198927:-.A.coreAndExt','chr3R:6203494:6203413|6200932:-@chr3R:6198463:6198927:-.B.dn_chr3R:6203494:6203413|6200932:-@chr3R:6198463:6198927:-.B.core'	(0,0):11,(0,1):1,(1,0):14,(1,1):5	0:16,1:4	(0,0):9,(0,1):1,(1,0):6,(1,1):18	0:6,1:19	chr3R	-	61984636198463	62034946203494
chr2R:5257883:5257754|5204798:-@chr2R:5196680:5200250:-	a5ss	0.79	0.67	0.95	0.99	0.96	1	-0.2	6.82	'chr2R:5257883:5257754|5204798:-@chr2R:5196680:5200250:-.A.dn_chr2R:5257883:5257754|5204798:-@chr2R:5196680:5200250:-.A.coreAndExt','chr2R:5257883:5257754|5204798:-@chr2R:5196680:5200250:-.B.dn_chr2R:5257883:5257754|5204798:-@chr2R:5196680:5200250:-.B.core'	(0,0):31,(0,1):1,(1,0):923,(1,1):70	0:982,1:12	(0,0):45,(1,0):2567,(1,1):49	0:2615,1:1	chr2R	-	51966805196680	52578835257883
chrX:11710567:11710459|11710455:-@chrX:11709203:11709572:-	a5ss	0.95	0.85	1	0.72	0.52	0.88	0.23	6.66	'chrX:11710567:11710459|11710455:-@chrX:11709203:11709572:-.A.dn_chrX:11710567:11710459|11710455:-@chrX:11709203:11709572:-.A.coreAndExt','chrX:11710567:11710459|11710455:-@chrX:11709203:11709572:-.B.dn_chrX:11710567:11710459|11710455:-@chrX:11709203:11709572:-.B.core'	(0,0):66,(1,0):26,(1,1):89	0.0798611	(0,0):67,(0,1):5,(1,0):16,(1,1):89	0:91,1:19	chrX	-	1170920311709200	1171056711710560
chrX:6161283:6161037|6155078:-@chrX:6153637:6153757:-	a5ss	0.46	0.31	0.66	0.78	0.58	0.94	-0.32	6.39	'chrX:6161283:6161037|6155078:-@chrX:6153637:6153757:-.A.dn_chrX:6161283:6161037|6155078:-@chrX:6153637:6153757:-.A.coreAndExt','chrX:6161283:6161037|6155078:-@chrX:6153637:6153757:-.B.dn_chrX:6161283:6161037|6155078:-@chrX:6153637:6153757:-.B.core'	(0,0):145,(1,0):421,(1,1):28	0:430,1:19	(0,0):204,(1,0):556,(1,1):21	0:571,1:6	chrX	-	61536376153637	61612836161283
chr3R:12473322:12473463|12473408:+@chr3R:12473558:12473651:+	a5ss	0.1	0	0.47	0.64	0.25	0.94	-0.54	6.04	'chr3R:12473322:12473463|12473408:+@chr3R:12473558:12473651:+.A.coreAndExt_chr3R:12473322:12473463|12473408:+@chr3R:12473558:12473651:+.A.dn','chr3R:12473322:12473463|12473408:+@chr3R:12473558:12473651:+.B.core_chr3R:12473322:12473463|12473408:+@chr3R:12473558:12473651:+.B.dn'	(0,0):50,(1,1):6	0:2,1:4	(0,0):57,(1,0):5,(1,1):11	0:15,1:1	chr3R	+	1247332212473320	1247365112473650
chr2R:10250565:10250626|10250583:+@chr2R:10250750:10251018:+	a5ss	0.08	0	0.34	0.39	0.18	0.7	-0.31	5.82	'chr2R:10250565:10250626|10250583:+@chr2R:10250750:10251018:+.A.coreAndExt_chr2R:10250565:10250626|10250583:+@chr2R:10250750:10251018:+.A.dn','chr2R:10250565:10250626|10250583:+@chr2R:10250750:10251018:+.B.core_chr2R:10250565:10250626|10250583:+@chr2R:10250750:10251018:+.B.dn'	(0,0):9,(0,1):3,(1,1):33	0:1,1:35	(0,0):25,(0,1):2,(1,0):5,(1,1):24	0:15,1:16	chr2R	+	1025056510250560	1025101810251010
chr2R:17375711:17375524|17375512:-@chr2R:17374670:17375350:-	a5ss	0.05	0.03	0.07	0.11	0.08	0.15	-0.06	5.75	'chr2R:17375711:17375524|17375512:-@chr2R:17374670:17375350:-.A.dn_chr2R:17375711:17375524|17375512:-@chr2R:17374670:17375350:-.A.coreAndExt','chr2R:17375711:17375524|17375512:-@chr2R:17374670:17375350:-.B.dn_chr2R:17375711:17375524|17375512:-@chr2R:17374670:17375350:-.B.core'	(0,0):134,(0,1):299,(1,0):18,(1,1):1822	0:87,1:2052	(0,0):117,(0,1):252,(1,0):36,(1,1):1721	0:224,1:1785	chr2R	-	1737467017374670	1737571117375710
chr2R:12003158:12003267|12003263:+@chr2R:12003326:12004041:+	a5ss	0.87	0.59	0.98	0.35	0.05	0.75	0.52	5.67	'chr2R:12003158:12003267|12003263:+@chr2R:12003326:12004041:+.A.coreAndExt_chr2R:12003158:12003267|12003263:+@chr2R:12003326:12004041:+.A.dn','chr2R:12003158:12003267|12003263:+@chr2R:12003326:12004041:+.B.core_chr2R:12003158:12003267|12003263:+@chr2R:12003326:12004041:+.B.dn'	(0,0):84,(1,0):8,(1,1):577	0:443,1:142	(0,0):151,(1,1):559	0:144,1:415	chr2R	+	1200315812003150	1200404112004040
chr2R:5885394:5885209|5884351:-@chr2R:5883325:5884126:-	a5ss	0.04	0.03	0.06	0.08	0.06	0.1	-0.04	5.45	'chr2R:5885394:5885209|5884351:-@chr2R:5883325:5884126:-.A.dn_chr2R:5885394:5885209|5884351:-@chr2R:5883325:5884126:-.A.coreAndExt','chr2R:5885394:5885209|5884351:-@chr2R:5883325:5884126:-.B.dn_chr2R:5885394:5885209|5884351:-@chr2R:5883325:5884126:-.B.core'	(0,0):99,(0,1):102,(1,0):38,(1,1):666	0:58,1:748	(0,0):112,(0,1):110,(1,0):66,(1,1):557	0:112,1:621	chr2R	-	58833255883325	58853945885394
chr2R:12003158:12003267|12003263:+@chr2R:12003323:12004041:+	a5ss	0.84	0.56	0.99	0.25	0.04	0.7	0.59	5.31	'chr2R:12003158:12003267|12003263:+@chr2R:12003323:12004041:+.A.coreAndExt_chr2R:12003158:12003267|12003263:+@chr2R:12003323:12004041:+.A.dn','chr2R:12003158:12003267|12003263:+@chr2R:12003323:12004041:+.B.core_chr2R:12003158:12003267|12003263:+@chr2R:12003323:12004041:+.B.dn'	(0,0):84,(1,0):8,(1,1):577	0:582,1:3	(0,0):150,(1,1):560	0:50,1:510	chr2R	+	1200315812003150	1200404112004040
chr3L:17067376:17067293|17063391:-@chr3L:17061093:17061158:-	a5ss	0.7	0.27	0.98	0.21	0.07	0.47	0.49	5.25	'chr3L:17067376:17067293|17063391:-@chr3L:17061093:17061158:-.A.dn_chr3L:17067376:17067293|17063391:-@chr3L:17061093:17061158:-.A.coreAndExt','chr3L:17067376:17067293|17063391:-@chr3L:17061093:17061158:-.B.dn_chr3L:17067376:17067293|17063391:-@chr3L:17061093:17061158:-.B.core'	(0,0):46,(1,0):83	0.0576389	(0,0):33,(0,1):3,(1,0):103	0:103,1:3	chr3L	-	1706109317061090	1706737617067370
chr3L:14530782:14530934|14530802:+@chr3L:14531104:14531521:+	a5ss	0.03	0.01	0.05	0.08	0.05	0.11	-0.05	5.16	'chr3L:14530782:14530934|14530802:+@chr3L:14531104:14531521:+.A.coreAndExt_chr3L:14530782:14530934|14530802:+@chr3L:14531104:14531521:+.A.dn','chr3L:14530782:14530934|14530802:+@chr3L:14531104:14531521:+.B.core_chr3L:14530782:14530934|14530802:+@chr3L:14531104:14531521:+.B.dn'	(0,0):127,(0,1):79,(1,0):7,(1,1):317	0:16,1:387	(0,0):128,(0,1):73,(1,0):25,(1,1):384	0:59,1:423	chr3L	+	1453078214530780	1453152114531520
chr2L:9521219:9521395|9521246:+@chr2L:9523163:9523343:+	a5ss	0.14	0.07	0.22	0.32	0.21	0.47	-0.18	4.95	'chr2L:9521219:9521395|9521246:+@chr2L:9523163:9523343:+.A.coreAndExt_chr2L:9521219:9521395|9521246:+@chr2L:9523163:9523343:+.A.dn','chr2L:9521219:9521395|9521246:+@chr2L:9523163:9523343:+.B.core_chr2L:9521219:9521395|9521246:+@chr2L:9523163:9523343:+.B.dn'	(0,0):206,(0,1):8,(1,0):16,(1,1):35	0:22,1:37	(0,0):317,(1,0):34,(1,1):42	0:52,1:24	chr2L	+	95212199521219	95233439523343
chr3L:18155649:18155411|18155407:-@chr3L:18152969:18153156:-	a5ss	0.45	0.2	0.76	0.1	0.01	0.33	0.35	4.9	'chr3L:18155649:18155411|18155407:-@chr3L:18152969:18153156:-.A.dn_chr3L:18155649:18155411|18155407:-@chr3L:18152969:18153156:-.A.coreAndExt','chr3L:18155649:18155411|18155407:-@chr3L:18152969:18153156:-.B.dn_chr3L:18155649:18155411|18155407:-@chr3L:18152969:18153156:-.B.core'	(0,0):73,(0,1):5,(1,0):4,(1,1):33	0:16,1:26	(0,0):63,(0,1):8,(1,1):26	0:4,1:30	chr3L	-	1815296918152960	1815564918155640
chr3R:11104225:11108359|11104282:+@chr3R:11110335:11110484:+	a5ss	0.02	0.01	0.03	0.09	0.05	0.19	-0.07	4.9	'chr3R:11104225:11108359|11104282:+@chr3R:11110335:11110484:+.A.coreAndExt_chr3R:11104225:11108359|11104282:+@chr3R:11110335:11110484:+.A.dn','chr3R:11104225:11108359|11104282:+@chr3R:11110335:11110484:+.B.core_chr3R:11104225:11108359|11104282:+@chr3R:11110335:11110484:+.B.dn'	(0,0):289,(0,1):1,(1,0):23,(1,1):16	0:24,1:16	(0,0):382,(1,0):74,(1,1):11	0:75,1:10	chr3R	+	1110422511104220	1111048411110480
chr3R:14485019:14484976|14484482:-@chr3R:14481887:14482907:-	a5ss	0.77	0.6	0.91	0.51	0.42	0.61	0.26	4.78	'chr3R:14485019:14484976|14484482:-@chr3R:14481887:14482907:-.A.dn_chr3R:14485019:14484976|14484482:-@chr3R:14481887:14482907:-.A.coreAndExt','chr3R:14485019:14484976|14484482:-@chr3R:14481887:14482907:-.B.dn_chr3R:14485019:14484976|14484482:-@chr3R:14481887:14482907:-.B.core'	(0,0):80,(1,0):80,(1,1):183	0:215,1:48	(0,0):96,(0,1):23,(1,0):94,(1,1):195	0:193,1:119	chr3R	-	1448188714481880	1448501914485010
chr2L:8159595:8159219|8155773:-@chr2L:8140500:8140778:-	a5ss	0.38	0.28	0.5	0.22	0.17	0.29	0.16	4.74	'chr2L:8159595:8159219|8155773:-@chr2L:8140500:8140778:-.A.dn_chr2L:8159595:8159219|8155773:-@chr2L:8140500:8140778:-.A.coreAndExt','chr2L:8159595:8159219|8155773:-@chr2L:8140500:8140778:-.B.dn_chr2L:8159595:8159219|8155773:-@chr2L:8140500:8140778:-.B.core'	(0,0):1041,(0,1):12,(1,0):132,(1,1):25	0:140,1:29	(0,0):826,(0,1):19,(1,0):143,(1,1):60	0:156,1:66	chr2L	-	81405008140500	81595958159595
chr3L:18666438:18665731|18665234:-@chr3L:18664590:18664772:-	a5ss	0.08	0.06	0.12	0.03	0.02	0.05	0.05	4.59	'chr3L:18666438:18665731|18665234:-@chr3L:18664590:18664772:-.A.dn_chr3L:18666438:18665731|18665234:-@chr3L:18664590:18664772:-.A.coreAndExt','chr3L:18666438:18665731|18665234:-@chr3L:18664590:18664772:-.B.dn_chr3L:18666438:18665731|18665234:-@chr3L:18664590:18664772:-.B.core'	(0,0):78,(0,1):93,(1,0):28,(1,1):240	0:40,1:321	(0,0):89,(0,1):99,(1,0):11,(1,1):313	0:15,1:408	chr3L	-	1866459018664590	1866643818666430
chr2L:12540692:12540516|12540477:-@chr2L:12537746:12539486:-	a5ss	0.68	0.42	0.9	0.3	0.12	0.53	0.38	4.57	'chr2L:12540692:12540516|12540477:-@chr2L:12537746:12539486:-.A.dn_chr2L:12540692:12540516|12540477:-@chr2L:12537746:12539486:-.A.coreAndExt','chr2L:12540692:12540516|12540477:-@chr2L:12537746:12539486:-.B.dn_chr2L:12540692:12540516|12540477:-@chr2L:12537746:12539486:-.B.core'	(0,0):297,(1,0):9,(1,1):474	0:431,1:52	(0,0):368,(0,1):2,(1,0):4,(1,1):574	0:193,1:387	chr2L	-	1253774612537740	1254069212540690
chr3R:2911079:2910687|2910647:-@chr3R:2910265:2910489:-	a5ss	0.84	0.74	0.92	0.98	0.93	1	-0.14	4.53	'chr3R:2911079:2910687|2910647:-@chr3R:2910265:2910489:-.A.dn_chr3R:2911079:2910687|2910647:-@chr3R:2910265:2910489:-.A.coreAndExt','chr3R:2911079:2910687|2910647:-@chr3R:2910265:2910489:-.B.dn_chr3R:2911079:2910687|2910647:-@chr3R:2910265:2910489:-.B.core'	(0,0):46,(0,1):4,(1,0):66,(1,1):134	0:165,1:39	(0,0):63,(1,0):99,(1,1):151	0:243,1:7	chr3R	-	29102652910265	29110792911079
chrX:17739094:17739453|17739393:+@chrX:17739523:17739791:+	a5ss	0.82	0.52	0.99	0.35	0.11	0.69	0.47	4.39	'chrX:17739094:17739453|17739393:+@chrX:17739523:17739791:+.A.coreAndExt_chrX:17739094:17739453|17739393:+@chrX:17739523:17739791:+.A.dn','chrX:17739094:17739453|17739393:+@chrX:17739523:17739791:+.B.core_chrX:17739094:17739453|17739393:+@chrX:17739523:17739791:+.B.dn'	(0,0):19,(1,0):9,(1,1):24	0:32,1:1	(0,0):15,(0,1):1,(1,0):3,(1,1):28	0:12,1:20	chrX	+	1773909417739090	1773979117739790
chr3R:11104225:11107575|11104282:+@chr3R:11110335:11110484:+	a5ss	0.01	0.01	0.03	0.08	0.04	0.17	-0.07	4.38	'chr3R:11104225:11107575|11104282:+@chr3R:11110335:11110484:+.A.coreAndExt_chr3R:11104225:11107575|11104282:+@chr3R:11110335:11110484:+.A.dn','chr3R:11104225:11107575|11104282:+@chr3R:11110335:11110484:+.B.core_chr3R:11104225:11107575|11104282:+@chr3R:11110335:11110484:+.B.dn'	(0,0):298,(0,1):1,(1,0):14,(1,1):16	0:15,1:16	(0,0):404,(1,0):52,(1,1):11	0:52,1:11	chr3R	+	1110422511104220	1111048411110480
chrX:11567366:11569059|11567494:+@chrX:11569364:11569672:+	a5ss	0.16	0.12	0.2	0.26	0.2	0.33	-0.1	4.19	'chrX:11567366:11569059|11567494:+@chrX:11569364:11569672:+.A.coreAndExt_chrX:11567366:11569059|11567494:+@chrX:11569364:11569672:+.A.dn','chrX:11567366:11569059|11567494:+@chrX:11569364:11569672:+.B.core_chrX:11567366:11569059|11567494:+@chrX:11569364:11569672:+.B.dn'	(0,0):51,(0,1):40,(1,0):119,(1,1):64	0:127,1:96	(0,0):65,(0,1):19,(1,0):141,(1,1):58	0:163,1:55	chrX	+	1156736611567360	1156967211569670
chr2L:2730126:2736229|2730372:+@chr2L:2736311:2736430:+	a5ss	0.33	0.16	0.62	0.73	0.41	0.97	-0.4	4.17	'chr2L:2730126:2736229|2730372:+@chr2L:2736311:2736430:+.A.coreAndExt_chr2L:2730126:2736229|2730372:+@chr2L:2736311:2736430:+.A.dn','chr2L:2730126:2736229|2730372:+@chr2L:2736311:2736430:+.B.core_chr2L:2730126:2736229|2730372:+@chr2L:2736311:2736430:+.B.dn'	(0,0):75,(1,0):80,(1,1):9	0:85,1:4	(0,0):42,(1,0):95,(1,1):1	0.0666667	chr2L	+	27301262730126	27364302736430
chr2L:8159595:8159219|8156517:-@chr2L:8140500:8140778:-	a5ss	0.41	0.29	0.54	0.23	0.18	0.3	0.18	4.16	'chr2L:8159595:8159219|8156517:-@chr2L:8140500:8140778:-.A.dn_chr2L:8159595:8159219|8156517:-@chr2L:8140500:8140778:-.A.coreAndExt','chr2L:8159595:8159219|8156517:-@chr2L:8140500:8140778:-.B.dn_chr2L:8159595:8159219|8156517:-@chr2L:8140500:8140778:-.B.core'	(0,0):1064,(0,1):12,(1,0):109,(1,1):25	0:117,1:29	(0,0):853,(0,1):19,(1,0):116,(1,1):60	0:131,1:64	chr2L	-	81405008140500	81595958159595
chr2L:21657659:21657741|21657667:+@chr2L:21657833:21658249:+	a5ss	0.27	0.04	0.59	0.71	0.37	0.95	-0.44	4.15	'chr2L:21657659:21657741|21657667:+@chr2L:21657833:21658249:+.A.coreAndExt_chr2L:21657659:21657741|21657667:+@chr2L:21657833:21658249:+.A.dn','chr2L:21657659:21657741|21657667:+@chr2L:21657833:21658249:+.B.core_chr2L:21657659:21657741|21657667:+@chr2L:21657833:21658249:+.B.dn'	(0,0):9,(1,0):1,(1,1):27	0:12,1:16	(0,0):19,(1,0):9,(1,1):34	0:37,1:6	chr2L	+	2165765921657650	2165824921658240
chrX:11589857:11590344|11589972:+@chrX:11590436:11590573:+	a5ss	0.28	0.19	0.38	0.54	0.37	0.73	-0.26	4.12	'chrX:11589857:11590344|11589972:+@chrX:11590436:11590573:+.A.coreAndExt_chrX:11589857:11590344|11589972:+@chrX:11590436:11590573:+.A.dn','chrX:11589857:11590344|11589972:+@chrX:11590436:11590573:+.B.core_chrX:11589857:11590344|11589972:+@chrX:11590436:11590573:+.B.dn'	(0,0):62,(0,1):23,(1,0):52,(1,1):1	0:53,1:23	(0,0):66,(0,1):9,(1,0):60,(1,1):1	0:61,1:9	chrX	+	1158985711589850	1159057311590570
chr2L:21179729:21179330|21178183:-@chr2L:21177571:21177678:-	a5ss	0.03	0.02	0.04	0.07	0.05	0.09	-0.04	4.11	'chr2L:21179729:21179330|21178183:-@chr2L:21177571:21177678:-.A.dn_chr2L:21179729:21179330|21178183:-@chr2L:21177571:21177678:-.A.coreAndExt','chr2L:21179729:21179330|21178183:-@chr2L:21177571:21177678:-.B.dn_chr2L:21179729:21179330|21178183:-@chr2L:21177571:21177678:-.B.core'	(0,0):36,(0,1):49,(1,0):20,(1,1):150	0:24,1:195	(0,0):46,(0,1):42,(1,0):43,(1,1):127	0:49,1:163	chr2L	-	2117757121177570	2117972921179720
chr2R:3254471:3254310|3250837:-@chr2R:3249223:3249372:-	a5ss	0.54	0.28	0.89	0.2	0.11	0.34	0.34	4.1	'chr2R:3254471:3254310|3250837:-@chr2R:3249223:3249372:-.A.dn_chr2R:3254471:3254310|3250837:-@chr2R:3249223:3249372:-.A.coreAndExt','chr2R:3254471:3254310|3250837:-@chr2R:3249223:3249372:-.B.dn_chr2R:3254471:3254310|3250837:-@chr2R:3249223:3249372:-.B.core'	(0,0):71,(0,1):1,(1,0):72,(1,1):4	0:74,1:3	(0,0):69,(0,1):5,(1,0):62,(1,1):6	0:63,1:10	chr2R	-	32492233249223	32544713254471
chr2L:2730126:2736136|2730372:+@chr2L:2736311:2736430:+	a5ss	0.3	0.15	0.54	0.73	0.41	0.96	-0.43	4.1	'chr2L:2730126:2736136|2730372:+@chr2L:2736311:2736430:+.A.coreAndExt_chr2L:2730126:2736136|2730372:+@chr2L:2736311:2736430:+.A.dn','chr2L:2730126:2736136|2730372:+@chr2L:2736311:2736430:+.B.core_chr2L:2730126:2736136|2730372:+@chr2L:2736311:2736430:+.B.dn'	(0,0):80,(1,0):75,(1,1):9	0:76,1:8	(0,0):45,(1,0):92,(1,1):1	0.0645833	chr2L	+	27301262730126	27364302736430
chrX:6589034:6587144|6586976:-@chrX:6586436:6586897:-	a5ss	0.52	0.35	0.72	0.84	0.68	0.96	-0.32	4.09	'chrX:6589034:6587144|6586976:-@chrX:6586436:6586897:-.A.dn_chrX:6589034:6587144|6586976:-@chrX:6586436:6586897:-.A.coreAndExt','chrX:6589034:6587144|6586976:-@chrX:6586436:6586897:-.B.dn_chrX:6589034:6587144|6586976:-@chrX:6586436:6586897:-.B.core'	(0,0):41,(0,1):4,(1,0):19,(1,1):341	0:192,1:172	(0,0):28,(0,1):2,(1,0):33,(1,1):297	0:278,1:54	chrX	-	65864366586436	65890346589034
chr3R:6203494:6203413|6200967:-@chr3R:6198463:6198927:-	a5ss	0.38	0.14	0.75	0.06	0.02	0.14	0.32	4.08	'chr3R:6203494:6203413|6200967:-@chr3R:6198463:6198927:-.A.dn_chr3R:6203494:6203413|6200967:-@chr3R:6198463:6198927:-.A.coreAndExt','chr3R:6203494:6203413|6200967:-@chr3R:6198463:6198927:-.B.dn_chr3R:6203494:6203413|6200967:-@chr3R:6198463:6198927:-.B.core'	(0,0):12,(0,1):1,(1,0):13,(1,1):5	0:15,1:4	(0,0):9,(0,1):1,(1,0):6,(1,1):18	0:7,1:18	chr3R	-	61984636198463	62034946203494
chr2L:19426322:19426779|19426698:+@chr2L:19427209:19429224:+	a5ss	0.54	0.19	0.92	0.11	0.01	0.32	0.43	3.83	'chr2L:19426322:19426779|19426698:+@chr2L:19427209:19429224:+.A.coreAndExt_chr2L:19426322:19426779|19426698:+@chr2L:19427209:19429224:+.A.dn','chr2L:19426322:19426779|19426698:+@chr2L:19427209:19429224:+.B.core_chr2L:19426322:19426779|19426698:+@chr2L:19427209:19429224:+.B.dn'	(0,0):24,(1,0):3,(1,1):131	0:85,1:49	(0,0):54,(1,1):234	0:106,1:128	chr2L	+	1942632219426320	1942922419429220
chr3R:21996570:21997177|21996760:+@chr3R:22009522:22009686:+	a5ss	0.62	0.46	0.77	0.84	0.74	0.94	-0.22	3.78	'chr3R:21996570:21997177|21996760:+@chr3R:22009522:22009686:+.A.coreAndExt_chr3R:21996570:21997177|21996760:+@chr3R:22009522:22009686:+.A.dn','chr3R:21996570:21997177|21996760:+@chr3R:22009522:22009686:+.B.core_chr3R:21996570:21997177|21996760:+@chr3R:22009522:22009686:+.B.dn'	(0,0):190,(0,1):8,(1,0):55,(1,1):5	0:57,1:11	(0,0):402,(0,1):6,(1,0):133,(1,1):7	0:138,1:8	chr3R	+	2199657021996570	2200968622009680
chrX:15401423:15402290|15401626:+@chrX:15403751:15404026:+	a5ss	0.19	0.13	0.27	0.08	0.05	0.13	0.11	3.75	'chrX:15401423:15402290|15401626:+@chrX:15403751:15404026:+.A.coreAndExt_chrX:15401423:15402290|15401626:+@chrX:15403751:15404026:+.A.dn','chrX:15401423:15402290|15401626:+@chrX:15403751:15404026:+.B.core_chrX:15401423:15402290|15401626:+@chrX:15403751:15404026:+.B.dn'	(0,0):74,(0,1):29,(1,0):35,(1,1):27	0:38,1:53	(0,0):107,(0,1):47,(1,0):22,(1,1):46	0:24,1:91	chrX	+	1540142315401420	1540402615404020
chr2R:5919331:5919094|5919085:-@chr2R:5918789:5918951:-	a5ss	0.25	0.04	0.62	0.77	0.46	0.99	-0.52	3.72	'chr2R:5919331:5919094|5919085:-@chr2R:5918789:5918951:-.A.dn_chr2R:5919331:5919094|5919085:-@chr2R:5918789:5918951:-.A.coreAndExt','chr2R:5919331:5919094|5919085:-@chr2R:5918789:5918951:-.B.dn_chr2R:5919331:5919094|5919085:-@chr2R:5918789:5918951:-.B.core'	(0,0):26,(0,1):2,(1,0):1,(1,1):15	0:5,1:13	(0,0):55,(1,0):5,(1,1):35	0:36,1:4	chr2R	-	59187895918789	59193315919331
chr2R:3254471:3254310|3251386:-@chr2R:3249223:3249372:-	a5ss	0.54	0.27	0.81	0.19	0.1	0.34	0.35	3.71	'chr2R:3254471:3254310|3251386:-@chr2R:3249223:3249372:-.A.dn_chr2R:3254471:3254310|3251386:-@chr2R:3249223:3249372:-.A.coreAndExt','chr2R:3254471:3254310|3251386:-@chr2R:3249223:3249372:-.B.dn_chr2R:3254471:3254310|3251386:-@chr2R:3249223:3249372:-.B.core'	(0,0):76,(0,1):1,(1,0):67,(1,1):4	0:68,1:4	(0,0):78,(0,1):5,(1,0):53,(1,1):6	0:55,1:9	chr2R	-	32492233249223	32544713254471
chr3R:11104225:11107579|11104282:+@chr3R:11110335:11110484:+	a5ss	0.01	0.01	0.03	0.08	0.04	0.16	-0.07	3.64	'chr3R:11104225:11107579|11104282:+@chr3R:11110335:11110484:+.A.coreAndExt_chr3R:11104225:11107579|11104282:+@chr3R:11110335:11110484:+.A.dn','chr3R:11104225:11107579|11104282:+@chr3R:11110335:11110484:+.B.core_chr3R:11104225:11107579|11104282:+@chr3R:11110335:11110484:+.B.dn'	(0,0):298,(0,1):1,(1,0):14,(1,1):16	0:14,1:17	(0,0):401,(1,0):55,(1,1):11	0:56,1:10	chr3R	+	1110422511104220	1111048411110480
chr3L:7362899:7363210|7363168:+@chr3L:7364832:7365172:+	a5ss	0.73	0.61	0.84	0.91	0.83	0.97	-0.18	3.49	'chr3L:7362899:7363210|7363168:+@chr3L:7364832:7365172:+.A.coreAndExt_chr3L:7362899:7363210|7363168:+@chr3L:7364832:7365172:+.A.dn','chr3L:7362899:7363210|7363168:+@chr3L:7364832:7365172:+.B.core_chr3L:7362899:7363210|7363168:+@chr3L:7364832:7365172:+.B.dn'	(0,0):552,(0,1):7,(1,0):64,(1,1):295	0:249,1:117	(0,0):721,(0,1):4,(1,0):112,(1,1):386	0:469,1:33	chr3L	+	73628997362899	73651727365172
chr2L:8159595:8159219|8156521:-@chr2L:8140500:8140778:-	a5ss	0.4	0.29	0.53	0.23	0.17	0.29	0.17	3.45	'chr2L:8159595:8159219|8156521:-@chr2L:8140500:8140778:-.A.dn_chr2L:8159595:8159219|8156521:-@chr2L:8140500:8140778:-.A.coreAndExt','chr2L:8159595:8159219|8156521:-@chr2L:8140500:8140778:-.B.dn_chr2L:8159595:8159219|8156521:-@chr2L:8140500:8140778:-.B.core'	(0,0):1063,(0,1):12,(1,0):110,(1,1):25	0:120,1:27	(0,0):852,(0,1):19,(1,0):117,(1,1):60	0:134,1:62	chr2L	-	81405008140500	81595958159595
chrX:15885968:15885926|15885784:-@chrX:15885116:15885415:-	a5ss	0.38	0.26	0.54	0.19	0.11	0.27	0.19	3.36	'chrX:15885968:15885926|15885784:-@chrX:15885116:15885415:-.A.dn_chrX:15885968:15885926|15885784:-@chrX:15885116:15885415:-.A.coreAndExt','chrX:15885968:15885926|15885784:-@chrX:15885116:15885415:-.B.dn_chrX:15885968:15885926|15885784:-@chrX:15885116:15885415:-.B.core'	(0,0):179,(0,1):4,(1,0):31,(1,1):72	0:68,1:39	(0,0):181,(0,1):12,(1,0):21,(1,1):92	0:52,1:73	chrX	-	1588511615885110	1588596815885960
chr2L:21179729:21179330|21177902:-@chr2L:21177571:21177678:-	a5ss	0.02	0.02	0.04	0.06	0.04	0.08	-0.04	3.33	'chr2L:21179729:21179330|21177902:-@chr2L:21177571:21177678:-.A.dn_chr2L:21179729:21179330|21177902:-@chr2L:21177571:21177678:-.A.coreAndExt','chr2L:21179729:21179330|21177902:-@chr2L:21177571:21177678:-.B.dn_chr2L:21179729:21179330|21177902:-@chr2L:21177571:21177678:-.B.core'	(0,0):33,(0,1):49,(1,0):23,(1,1):150	0:26,1:196	(0,0):42,(0,1):42,(1,0):47,(1,1):127	0:55,1:161	chr2L	-	2117757121177570	2117972921179720
chr3L:9454155:9454659|9454392:+@chr3L:9454988:9457806:+	a5ss	0.86	0.69	0.96	0.51	0.28	0.86	0.35	3.3	'chr3L:9454155:9454659|9454392:+@chr3L:9454988:9457806:+.A.coreAndExt_chr3L:9454155:9454659|9454392:+@chr3L:9454988:9457806:+.A.dn','chr3L:9454155:9454659|9454392:+@chr3L:9454988:9457806:+.B.core_chr3L:9454155:9454659|9454392:+@chr3L:9454988:9457806:+.B.dn'	(0,0):40,(1,0):27,(1,1):261	0:230,1:58	(0,0):26,(1,0):11,(1,1):262	0:167,1:106	chr3L	+	94541559454155	94578069457806
chr3L:9806947:9807071|9807022:+@chr3L:9813380:9813659:+	a5ss	0.26	0.08	0.59	0.03	0	0.13	0.23	3.14	'chr3L:9806947:9807071|9807022:+@chr3L:9813380:9813659:+.A.coreAndExt_chr3L:9806947:9807071|9807022:+@chr3L:9813380:9813659:+.A.dn','chr3L:9806947:9807071|9807022:+@chr3L:9813380:9813659:+.B.core_chr3L:9806947:9807071|9807022:+@chr3L:9813380:9813659:+.B.dn'	(0,0):313,(1,0):3,(1,1):60	0:16,1:47	(0,0):456,(0,1):4,(1,1):98	0:5,1:97	chr3L	+	98069479806947	98136599813659
chr3R:15052456:15052203|15051921:-@chr3R:15051737:15051792:-	a5ss	0.07	0.03	0.14	0.2	0.13	0.29	-0.13	3.05	'chr3R:15052456:15052203|15051921:-@chr3R:15051737:15051792:-.A.dn_chr3R:15052456:15052203|15051921:-@chr3R:15051737:15051792:-.A.coreAndExt','chr3R:15052456:15052203|15051921:-@chr3R:15051737:15051792:-.B.dn_chr3R:15052456:15052203|15051921:-@chr3R:15051737:15051792:-.B.core'	(0,0):21,(0,1):33,(1,0):8,(1,1):2	0:8,1:35	(0,0):57,(0,1):26,(1,0):29,(1,1):16	0:30,1:41	chr3R	-	1505173715051730	1505245615052450
chr3L:980054:980221|980191:+@chr3L:980951:981207:+	a5ss	0.76	0.3	1	0.3	0.06	0.61	0.46	3.02	'chr3L:980054:980221|980191:+@chr3L:980951:981207:+.A.coreAndExt_chr3L:980054:980221|980191:+@chr3L:980951:981207:+.A.dn','chr3L:980054:980221|980191:+@chr3L:980951:981207:+.B.core_chr3L:980054:980221|980191:+@chr3L:980951:981207:+.B.dn'	(0,0):35,(1,0):4,(1,1):15	0:13,1:6	(0,0):42,(0,1):1,(1,0):1,(1,1):16	0:5,1:13	chr3L	+	980054980054	981207981207
chr2L:14741509:14741722:-@chr2L:14737494|14737548:14737445:-	a3ss	0.99	0.97	1	0.28	0.03	0.69	0.71	18515.9	'chr2L:14741509:14741722:-@chr2L:14737494|14737548:14737445:-.A.coreAndExt_chr2L:14741509:14741722:-@chr2L:14737494|14737548:14737445:-.A.up','chr2L:14741509:14741722:-@chr2L:14737494|14737548:14737445:-.B.core_chr2L:14741509:14741722:-@chr2L:14737494|14737548:14737445:-.B.up'	(0,0):353,(0,1):1,(1,0):251,(1,1):15	0:266,1:1	(0,0):359,(1,1):4	0:0,1:4	chr2L	-	1473744514737440	1474172214741720
chrX:10771448:10771840:-@chrX:10766072|10770029:10765562:-	a3ss	0.27	0.23	0.32	0.18	0.15	0.21	0.09	33.72	'chrX:10771448:10771840:-@chrX:10766072|10770029:10765562:-.A.coreAndExt_chrX:10771448:10771840:-@chrX:10766072|10770029:10765562:-.A.up','chrX:10771448:10771840:-@chrX:10766072|10770029:10765562:-.B.core_chrX:10771448:10771840:-@chrX:10766072|10770029:10765562:-.B.up'	(0,0):77,(0,1):38,(1,0):254,(1,1):107	0:290,1:109	(0,0):71,(0,1):57,(1,0):234,(1,1):157	0:259,1:189	chrX	-	1076556210765560	1077184010771840
chr3R:1112624:1112931:-@chr3R:1100809|1108957:1100688:-	a3ss	0.53	0.44	0.65	0.77	0.69	0.86	-0.24	22.4	'chr3R:1112624:1112931:-@chr3R:1100809|1108957:1100688:-.A.coreAndExt_chr3R:1112624:1112931:-@chr3R:1100809|1108957:1100688:-.A.up','chr3R:1112624:1112931:-@chr3R:1100809|1108957:1100688:-.B.core_chr3R:1112624:1112931:-@chr3R:1100809|1108957:1100688:-.B.up'	(0,0):526,(0,1):14,(1,0):1161,(1,1):32	0:1175,1:32	(0,0):447,(0,1):16,(1,0):2655,(1,1):26	0:2677,1:20	chr3R	-	11006881100688	11129311112931
chr2R:12097695:12097877:-@chr2R:12093584|12093732:12093406:-	a3ss	0.04	0.02	0.08	0.14	0.09	0.2	-0.1	17.23	'chr2R:12097695:12097877:-@chr2R:12093584|12093732:12093406:-.A.coreAndExt_chr2R:12097695:12097877:-@chr2R:12093584|12093732:12093406:-.A.up','chr2R:12097695:12097877:-@chr2R:12093584|12093732:12093406:-.B.core_chr2R:12097695:12097877:-@chr2R:12093584|12093732:12093406:-.B.up'	(0,0):228,(0,1):47,(1,0):6,(1,1):58	0:9,1:102	(0,0):349,(0,1):50,(1,0):25,(1,1):53	0:27,1:101	chr2R	-	1209340612093400	1209787712097870
chr3L:16584104:16584490:-@chr3L:16583855|16584030:16583452:-	a3ss	0.58	0.41	0.73	0.89	0.76	0.97	-0.31	12.74	'chr3L:16584104:16584490:-@chr3L:16583855|16584030:16583452:-.A.coreAndExt_chr3L:16584104:16584490:-@chr3L:16583855|16584030:16583452:-.A.up','chr3L:16584104:16584490:-@chr3L:16583855|16584030:16583452:-.B.core_chr3L:16584104:16584490:-@chr3L:16583855|16584030:16583452:-.B.up'	(0,0):4,(0,1):7,(1,0):21,(1,1):27	0:43,1:12	(0,0):7,(0,1):2,(1,0):35,(1,1):22	0:56,1:3	chr3L	-	1658345216583450	1658449016584490
chr3R:1493415:1493672:-@chr3R:1493027|1493063:1492820:-	a3ss	0.31	0.2	0.43	0.09	0.03	0.18	0.22	12.43	'chr3R:1493415:1493672:-@chr3R:1493027|1493063:1492820:-.A.coreAndExt_chr3R:1493415:1493672:-@chr3R:1493027|1493063:1492820:-.A.up','chr3R:1493415:1493672:-@chr3R:1493027|1493063:1492820:-.B.core_chr3R:1493415:1493672:-@chr3R:1493027|1493063:1492820:-.B.up'	(0,0):93,(0,1):20,(1,0):16,(1,1):71	0:38,1:69	(0,0):94,(0,1):25,(1,0):4,(1,1):106	0:17,1:118	chr3R	-	14928201492820	14936721493672
chr2R:16723175:16723706:-@chr2R:16713057|16720094:16712807:-	a3ss	0.82	0.74	0.9	0.65	0.57	0.73	0.17	7.27	'chr2R:16723175:16723706:-@chr2R:16713057|16720094:16712807:-.A.coreAndExt_chr2R:16723175:16723706:-@chr2R:16713057|16720094:16712807:-.A.up','chr2R:16723175:16723706:-@chr2R:16713057|16720094:16712807:-.B.core_chr2R:16723175:16723706:-@chr2R:16713057|16720094:16712807:-.B.up'	(0,0):126,(0,1):11,(1,0):987,(1,1):30	0:1013,1:15	(0,0):180,(0,1):22,(1,0):1110,(1,1):75	0:1163,1:44	chr2R	-	1671280716712800	1672370616723700
chr3R:13216218:13216322:-@chr3R:13202988|13208128:13202839:-	a3ss	0.38	0.16	0.67	0.07	0.04	0.12	0.31	6.59	'chr3R:13216218:13216322:-@chr3R:13202988|13208128:13202839:-.A.coreAndExt_chr3R:13216218:13216322:-@chr3R:13202988|13208128:13202839:-.A.up','chr3R:13216218:13216322:-@chr3R:13202988|13208128:13202839:-.B.core_chr3R:13216218:13216322:-@chr3R:13202988|13208128:13202839:-.B.up'	(0,0):1720,(0,1):3,(1,0):95	0:95,1:3	(0,0):1290,(0,1):11,(1,0):63,(1,1):2	0:63,1:13	chr3R	-	1320283913202830	1321632213216320
chr2R:12108628:12108654:-@chr2R:12093584|12093732:12093406:-	a3ss	0.17	0.05	0.34	0.5	0.29	0.75	-0.33	6.09	'chr2R:12108628:12108654:-@chr2R:12093584|12093732:12093406:-.A.coreAndExt_chr2R:12108628:12108654:-@chr2R:12093584|12093732:12093406:-.A.up','chr2R:12108628:12108654:-@chr2R:12093584|12093732:12093406:-.B.core_chr2R:12108628:12108654:-@chr2R:12093584|12093732:12093406:-.B.up'	(0,0):473,(0,1):2,(1,0):6,(1,1):16	0:12,1:12	(0,0):645,(0,1):1,(1,0):23,(1,1):17	0:32,1:9	chr2R	-	1209340612093400	1210865412108650
chr3R:20655972:20656106:+@chr3R:20656161|20656171:20657187:+	a3ss	0.46	0.21	0.76	0.89	0.62	1	-0.43	5.48	'chr3R:20655972:20656106:+@chr3R:20656161|20656171:20657187:+.A.up_chr3R:20655972:20656106:+@chr3R:20656161|20656171:20657187:+.A.coreAndExt','chr3R:20655972:20656106:+@chr3R:20656161|20656171:20657187:+.B.up_chr3R:20655972:20656106:+@chr3R:20656161|20656171:20657187:+.B.core'	(0,1):5,(1,0):4,(1,1):31	0:16,1:24	(1,0):11,(1,1):47	0:47,1:11	chr3R	+	2065597220655970	2065718720657180
chr3R:15429066:15429134:+@chr3R:15429501|15429556:15429978:+	a3ss	0.12	0.03	0.29	0.58	0.24	0.93	-0.46	4.66	'chr3R:15429066:15429134:+@chr3R:15429501|15429556:15429978:+.A.up_chr3R:15429066:15429134:+@chr3R:15429501|15429556:15429978:+.A.coreAndExt','chr3R:15429066:15429134:+@chr3R:15429501|15429556:15429978:+.B.up_chr3R:15429066:15429134:+@chr3R:15429501|15429556:15429978:+.B.core'	(0,0):6,(0,1):10,(1,0):2,(1,1):44	0:8,1:48	(0,0):3,(1,0):5,(1,1):38	0:30,1:13	chr3R	+	1542906615429060	1542997815429970
chr3L:12809299:12811625:+@chr3L:12811682|12811701:12814907:+	a3ss	0.21	0.01	0.57	0.63	0.37	0.89	-0.42	4.05	'chr3L:12809299:12811625:+@chr3L:12811682|12811701:12814907:+.A.up_chr3L:12809299:12811625:+@chr3L:12811682|12811701:12814907:+.A.coreAndExt','chr3L:12809299:12811625:+@chr3L:12811682|12811701:12814907:+.B.up_chr3L:12809299:12811625:+@chr3L:12811682|12811701:12814907:+.B.core'	(0,0):17,(0,1):4,(1,1):253	0:60,1:197	(0,0):20,(0,1):2,(1,0):5,(1,1):409	0:166,1:250	chr3L	+	1280929912809290	1281490712814900
chr3R:26213186:26213272:-@chr3R:26212440:26212550:-@chr3R:26212041:26212318:-	se	0.01	0.01	0.02	0.05	0.04	0.06	-0.04	1000000000000	'chr3R:26213186:26213272:-@chr3R:26212440:26212550:-@chr3R:26212041:26212318:-.A.dn_chr3R:26213186:26213272:-@chr3R:26212440:26212550:-@chr3R:26212041:26212318:-.A.se_chr3R:26213186:26213272:-@chr3R:26212440:26212550:-@chr3R:26212041:26212318:-.A.up','chr3R:26213186:26213272:-@chr3R:26212440:26212550:-@chr3R:26212041:26212318:-.B.dn_chr3R:26213186:26213272:-@chr3R:26212440:26212550:-@chr3R:262120…	(0,0):430,(0,1):297,(1,0):13,(1,1):700	0:18,1:992	(0,0):548,(0,1):413,(1,0):72,(1,1):874	0:114,1:1245	chr3R	-	2621204126212040	2621327226213270
chr2R:1311255:1311744:+@chr2R:1323157:1323917:+@chr2R:1327075:1327259:+	se	0.61	0.55	0.67	0.41	0.37	0.45	0.2	1000000000000	'chr2R:1311255:1311744:+@chr2R:1323157:1323917:+@chr2R:1327075:1327259:+.A.up_chr2R:1311255:1311744:+@chr2R:1323157:1323917:+@chr2R:1327075:1327259:+.A.se_chr2R:1311255:1311744:+@chr2R:1323157:1323917:+@chr2R:1327075:1327259:+.A.dn','chr2R:1311255:1311744:+@chr2R:1323157:1323917:+@chr2R:1327075:1327259:+.B.up_chr2R:1311255:1311744:+@chr2R:1323157:1323917:+@chr2R:1327075:1327259:+.B.dn'	(0,0):1088,(0,1):1,(1,0):814,(1,1):831	0:1277,1:369	(0,0):896,(0,1):1,(1,0):552,(1,1):859	0:896,1:516	chr2R	+	13112551311255	13272591327259
chr2R:3669232:3670182:-@chr2R:3665980:3667390:-@chr2R:3625267:3629425:-	se	0.28	0.24	0.32	0.42	0.38	0.47	-0.14	2.54263e+07	'chr2R:3669232:3670182:-@chr2R:3665980:3667390:-@chr2R:3625267:3629425:-.A.dn_chr2R:3669232:3670182:-@chr2R:3665980:3667390:-@chr2R:3625267:3629425:-.A.se_chr2R:3669232:3670182:-@chr2R:3665980:3667390:-@chr2R:3625267:3629425:-.A.up','chr2R:3669232:3670182:-@chr2R:3665980:3667390:-@chr2R:3625267:3629425:-.B.dn_chr2R:3669232:3670182:-@chr2R:3665980:3667390:-@chr2R:3625267:3629425:-.B.up'	(0,0):2195,(1,0):217,(1,1):2692	0:885,1:2024	(0,0):2047,(0,1):1,(1,0):362,(1,1):3010	0:1692,1:1681	chr2R	-	36252673625267	36701823670182
chrX:10469423:10470189:-@chrX:10416836:10417597:-@chrX:10413381:10413810:-	se	0.41	0.33	0.49	0.7	0.6	0.8	-0.29	1.11991e+07	'chrX:10469423:10470189:-@chrX:10416836:10417597:-@chrX:10413381:10413810:-.A.dn_chrX:10469423:10470189:-@chrX:10416836:10417597:-@chrX:10413381:10413810:-.A.se_chrX:10469423:10470189:-@chrX:10416836:10417597:-@chrX:10413381:10413810:-.A.up','chrX:10469423:10470189:-@chrX:10416836:10417597:-@chrX:10413381:10413810:-.B.dn_chrX:10469423:10470189:-@chrX:10416836:10417597:-@chrX:10413381:10413810:-.B…	(0,0):2531,(0,1):26,(1,0):114,(1,1):272	0:224,1:188	(0,0):2666,(0,1):7,(1,0):162,(1,1):251	0:330,1:90	chrX	-	1041338110413380	1047018910470180
chr2L:5093445:5093590:-@chr2L:5092875:5092898:-@chr2L:5078462:5079574:-	se	0.9	0.74	0.99	0.43	0.28	0.6	0.47	583158	'chr2L:5093445:5093590:-@chr2L:5092875:5092898:-@chr2L:5078462:5079574:-.A.dn_chr2L:5093445:5093590:-@chr2L:5092875:5092898:-@chr2L:5078462:5079574:-.A.se_chr2L:5093445:5093590:-@chr2L:5092875:5092898:-@chr2L:5078462:5079574:-.A.up','chr2L:5093445:5093590:-@chr2L:5092875:5092898:-@chr2L:5078462:5079574:-.B.dn_chr2L:5093445:5093590:-@chr2L:5092875:5092898:-@chr2L:5078462:5079574:-.B.up'	(0,0):386,(1,0):26,(1,1):617	0:520,1:123	(0,0):463,(0,1):13,(1,0):18,(1,1):803	0:360,1:474	chr2L	-	50784625078462	50935905093590
chr3R:6151983:6152204:-@chr3R:6151454:6151753:-@chr3R:6150964:6151378:-	se	0.04	0.01	0.08	0.21	0.14	0.29	-0.17	133464	'chr3R:6151983:6152204:-@chr3R:6151454:6151753:-@chr3R:6150964:6151378:-.A.dn_chr3R:6151983:6152204:-@chr3R:6151454:6151753:-@chr3R:6150964:6151378:-.A.se_chr3R:6151983:6152204:-@chr3R:6151454:6151753:-@chr3R:6150964:6151378:-.A.up','chr3R:6151983:6152204:-@chr3R:6151454:6151753:-@chr3R:6150964:6151378:-.B.dn_chr3R:6151983:6152204:-@chr3R:6151454:6151753:-@chr3R:6150964:6151378:-.B.up'	(0,0):21,(0,1):27,(1,0):4,(1,1):117	0:13,1:135	(0,0):34,(0,1):25,(1,0):28,(1,1):129	0:55,1:127	chr3R	-	61509646150964	61522046152204
chr3L:4148706:4149025:+@chr3L:4150222:4150391:+@chr3L:4150464:4150722:+	se	0.95	0.81	1	0.53	0.36	0.7	0.42	26703.5	'chr3L:4148706:4149025:+@chr3L:4150222:4150391:+@chr3L:4150464:4150722:+.A.up_chr3L:4148706:4149025:+@chr3L:4150222:4150391:+@chr3L:4150464:4150722:+.A.se_chr3L:4148706:4149025:+@chr3L:4150222:4150391:+@chr3L:4150464:4150722:+.A.dn','chr3L:4148706:4149025:+@chr3L:4150222:4150391:+@chr3L:4150464:4150722:+.B.up_chr3L:4148706:4149025:+@chr3L:4150222:4150391:+@chr3L:4150464:4150722:+.B.dn'	(0,0):19,(1,0):51,(1,1):35	0:85,1:1	(0,0):72,(0,1):7,(1,0):28,(1,1):68	0:73,1:30	chr3L	+	41487064148706	41507224150722
chr3R:22082655:22082854:-@chr3R:22082196:22082345:-@chr3R:22081734:22082029:-	se	0.14	0.09	0.19	0.31	0.25	0.38	-0.17	7534.99	'chr3R:22082655:22082854:-@chr3R:22082196:22082345:-@chr3R:22081734:22082029:-.A.dn_chr3R:22082655:22082854:-@chr3R:22082196:22082345:-@chr3R:22081734:22082029:-.A.se_chr3R:22082655:22082854:-@chr3R:22082196:22082345:-@chr3R:22081734:22082029:-.A.up','chr3R:22082655:22082854:-@chr3R:22082196:22082345:-@chr3R:22081734:22082029:-.B.dn_chr3R:22082655:22082854:-@chr3R:22082196:22082345:-@chr3R:220817…	(0,0):93,(0,1):45,(1,0):27,(1,1):209	0:48,1:233	(0,0):116,(0,1):39,(1,0):71,(1,1):238	0:141,1:207	chr3R	-	2208173422081730	2208285422082850
chr2R:5993211:5993330:+@chr2R:5993446:5993609:+@chr2R:5994972:5995249:+	se	0.64	0.57	0.72	0.44	0.39	0.5	0.2	6777	'chr2R:5993211:5993330:+@chr2R:5993446:5993609:+@chr2R:5994972:5995249:+.A.up_chr2R:5993211:5993330:+@chr2R:5993446:5993609:+@chr2R:5994972:5995249:+.A.se_chr2R:5993211:5993330:+@chr2R:5993446:5993609:+@chr2R:5994972:5995249:+.A.dn','chr2R:5993211:5993330:+@chr2R:5993446:5993609:+@chr2R:5994972:5995249:+.B.up_chr2R:5993211:5993330:+@chr2R:5993446:5993609:+@chr2R:5994972:5995249:+.B.dn'	(0,0):1191,(0,1):8,(1,0):393,(1,1):680	0:860,1:221	(0,0):1270,(0,1):6,(1,0):284,(1,1):761	0:637,1:414	chr2R	+	59932115993211	59952495995249
chr3L:3903004:3903138:-@chr3L:3902527:3902707:-@chr3L:3901256:3901770:-	se	0.45	0.41	0.48	0.35	0.33	0.37	0.1	2721.09	'chr3L:3903004:3903138:-@chr3L:3902527:3902707:-@chr3L:3901256:3901770:-.A.dn_chr3L:3903004:3903138:-@chr3L:3902527:3902707:-@chr3L:3901256:3901770:-.A.se_chr3L:3903004:3903138:-@chr3L:3902527:3902707:-@chr3L:3901256:3901770:-.A.up','chr3L:3903004:3903138:-@chr3L:3902527:3902707:-@chr3L:3901256:3901770:-.B.dn_chr3L:3903004:3903138:-@chr3L:3902527:3902707:-@chr3L:3901256:3901770:-.B.up'	(0,0):377,(0,1):40,(1,0):715,(1,1):3725	0:2270,1:2210	(0,0):562,(0,1):98,(1,0):938,(1,1):6107	0:2978,1:4165	chr3L	-	39012563901256	39031383903138
chr2R:10064117:10064196:+@chr2R:10064680:10064982:+@chr2R:10065390:10065526:+	se	0.83	0.64	0.98	0.37	0.25	0.52	0.46	1440.55	'chr2R:10064117:10064196:+@chr2R:10064680:10064982:+@chr2R:10065390:10065526:+.A.up_chr2R:10064117:10064196:+@chr2R:10064680:10064982:+@chr2R:10065390:10065526:+.A.se_chr2R:10064117:10064196:+@chr2R:10064680:10064982:+@chr2R:10065390:10065526:+.A.dn','chr2R:10064117:10064196:+@chr2R:10064680:10064982:+@chr2R:10065390:10065526:+.B.up_chr2R:10064117:10064196:+@chr2R:10064680:10064982:+@chr2R:100653…	(0,0):70,(1,0):48,(1,1):2	0.0347222	(0,0):86,(0,1):10,(1,0):46,(1,1):4	0:48,1:12	chr2R	+	1006411710064110	1006552610065520
chr3L:830908:831242:-@chr3L:830622:830728:-@chr3L:830034:830341:-	se	0.23	0.15	0.32	0.06	0.02	0.1	0.17	172	'chr3L:830908:831242:-@chr3L:830622:830728:-@chr3L:830034:830341:-.A.dn_chr3L:830908:831242:-@chr3L:830622:830728:-@chr3L:830034:830341:-.A.se_chr3L:830908:831242:-@chr3L:830622:830728:-@chr3L:830034:830341:-.A.up','chr3L:830908:831242:-@chr3L:830622:830728:-@chr3L:830034:830341:-.B.dn_chr3L:830908:831242:-@chr3L:830622:830728:-@chr3L:830034:830341:-.B.up'	(0,0):67,(0,1):36,(1,0):24,(1,1):146	0:53,1:153	(0,0):128,(0,1):61,(1,0):7,(1,1):185	0:18,1:235	chr3L	-	830034830034	831242831242
chr2R:5171333:5171596:-@chr2R:5159490:5159679:-@chr2R:5155160:5155481:-	se	0.17	0.12	0.23	0.36	0.3	0.43	-0.19	114.83	'chr2R:5171333:5171596:-@chr2R:5159490:5159679:-@chr2R:5155160:5155481:-.A.dn_chr2R:5171333:5171596:-@chr2R:5159490:5159679:-@chr2R:5155160:5155481:-.A.se_chr2R:5171333:5171596:-@chr2R:5159490:5159679:-@chr2R:5155160:5155481:-.A.up','chr2R:5171333:5171596:-@chr2R:5159490:5159679:-@chr2R:5155160:5155481:-.B.dn_chr2R:5171333:5171596:-@chr2R:5159490:5159679:-@chr2R:5155160:5155481:-.B.up'	(0,0):384,(0,1):58,(1,0):34,(1,1):182	0:75,1:199	(0,0):545,(0,1):53,(1,0):88,(1,1):218	0:171,1:188	chr2R	-	51551605155160	51715965171596
chr2R:18619171:18619425:-@chr2R:18618649:18618996:-@chr2R:18618320:18618517:-	se	0.23	0.16	0.31	0.51	0.39	0.66	-0.28	114.11	'chr2R:18619171:18619425:-@chr2R:18618649:18618996:-@chr2R:18618320:18618517:-.A.dn_chr2R:18619171:18619425:-@chr2R:18618649:18618996:-@chr2R:18618320:18618517:-.A.se_chr2R:18619171:18619425:-@chr2R:18618649:18618996:-@chr2R:18618320:18618517:-.A.up','chr2R:18619171:18619425:-@chr2R:18618649:18618996:-@chr2R:18618320:18618517:-.B.dn_chr2R:18619171:18619425:-@chr2R:18618649:18618996:-@chr2R:186183…	(0,0):45,(0,1):45,(1,0):40,(1,1):28	0:42,1:71	(0,0):32,(0,1):14,(1,0):49,(1,1):21	0:61,1:23	chr2R	-	1861832018618320	1861942518619420
chrX:15792988:15793107:+@chrX:15793477:15793488:+@chrX:15795577:15795780:+	se	0.69	0.51	0.86	0.2	0.08	0.39	0.49	79.19	'chrX:15792988:15793107:+@chrX:15793477:15793488:+@chrX:15795577:15795780:+.A.up_chrX:15792988:15793107:+@chrX:15793477:15793488:+@chrX:15795577:15795780:+.A.se_chrX:15792988:15793107:+@chrX:15793477:15793488:+@chrX:15795577:15795780:+.A.dn','chrX:15792988:15793107:+@chrX:15793477:15793488:+@chrX:15795577:15795780:+.B.up_chrX:15792988:15793107:+@chrX:15793477:15793488:+@chrX:15795577:15795780:+.B…	(0,0):120,(0,1):6,(1,0):18,(1,1):26	0:31,1:19	(0,0):139,(0,1):15,(1,0):4,(1,1):29	0:10,1:38	chrX	+	1579298815792980	1579578015795780
chr2L:8915661:8916053:+@chr2L:8922938:8923456:+@chr2L:8925204:8925529:+	se	0.82	0.71	0.92	0.58	0.5	0.66	0.24	59.62	'chr2L:8915661:8916053:+@chr2L:8922938:8923456:+@chr2L:8925204:8925529:+.A.up_chr2L:8915661:8916053:+@chr2L:8922938:8923456:+@chr2L:8925204:8925529:+.A.se_chr2L:8915661:8916053:+@chr2L:8922938:8923456:+@chr2L:8925204:8925529:+.A.dn','chr2L:8915661:8916053:+@chr2L:8922938:8923456:+@chr2L:8925204:8925529:+.B.up_chr2L:8915661:8916053:+@chr2L:8922938:8923456:+@chr2L:8925204:8925529:+.B.dn'	(0,0):151,(0,1):5,(1,0):122,(1,1):91	0:196,1:22	(0,0):204,(0,1):33,(1,0):174,(1,1):147	0:270,1:84	chr2L	+	89156618915661	89255298925529
chr2R:6138384:6138649:-@chr2R:6137874:6138091:-@chr2R:6136949:6137332:-	se	0.2	0.18	0.23	0.14	0.12	0.16	0.06	51.68	'chr2R:6138384:6138649:-@chr2R:6137874:6138091:-@chr2R:6136949:6137332:-.A.dn_chr2R:6138384:6138649:-@chr2R:6137874:6138091:-@chr2R:6136949:6137332:-.A.se_chr2R:6138384:6138649:-@chr2R:6137874:6138091:-@chr2R:6136949:6137332:-.A.up','chr2R:6138384:6138649:-@chr2R:6137874:6138091:-@chr2R:6136949:6137332:-.B.dn_chr2R:6138384:6138649:-@chr2R:6137874:6138091:-@chr2R:6136949:6137332:-.B.up'	(0,0):309,(0,1):322,(1,0):226,(1,1):1079	0:453,1:1174	(0,0):428,(0,1):440,(1,0):208,(1,1):1523	0:400,1:1771	chr2R	-	61369496136949	61386496138649
chr2L:13370842:13371110:-@chr2L:13370624:13370763:-@chr2L:13370219:13370564:-	se	0.88	0.83	0.92	0.98	0.95	0.99	-0.1	49.7	'chr2L:13370842:13371110:-@chr2L:13370624:13370763:-@chr2L:13370219:13370564:-.A.dn_chr2L:13370842:13371110:-@chr2L:13370624:13370763:-@chr2L:13370219:13370564:-.A.se_chr2L:13370842:13371110:-@chr2L:13370624:13370763:-@chr2L:13370219:13370564:-.A.up','chr2L:13370842:13371110:-@chr2L:13370624:13370763:-@chr2L:13370219:13370564:-.B.dn_chr2L:13370842:13371110:-@chr2L:13370624:13370763:-@chr2L:133702…	(0,0):4,(0,1):7,(1,0):264,(1,1):182	0:410,1:43	(0,0):10,(1,0):305,(1,1):196	0:498,1:3	chr2L	-	1337021913370210	1337111013371110
chr2R:11998034:11998176:+@chr2R:11999006:11999059:+@chr2R:11999246:11999431:+	se	0.11	0.06	0.16	0.02	0.01	0.04	0.09	42.43	'chr2R:11998034:11998176:+@chr2R:11999006:11999059:+@chr2R:11999246:11999431:+.A.up_chr2R:11998034:11998176:+@chr2R:11999006:11999059:+@chr2R:11999246:11999431:+.A.se_chr2R:11998034:11998176:+@chr2R:11999006:11999059:+@chr2R:11999246:11999431:+.A.dn','chr2R:11998034:11998176:+@chr2R:11999006:11999059:+@chr2R:11999246:11999431:+.B.up_chr2R:11998034:11998176:+@chr2R:11999006:11999059:+@chr2R:119992…	(0,0):87,(0,1):64,(1,0):17,(1,1):97	0:28,1:150	(0,0):57,(0,1):85,(1,0):3,(1,1):112	0:5,1:195	chr2R	+	1199803411998030	1199943111999430
chr3L:12257721:12258010:-@chr3L:12233753:12233774:-@chr3L:12213078:12214382:-	se	0.45	0.29	0.63	0.13	0.03	0.26	0.32	27.55	'chr3L:12257721:12258010:-@chr3L:12233753:12233774:-@chr3L:12213078:12214382:-.A.dn_chr3L:12257721:12258010:-@chr3L:12233753:12233774:-@chr3L:12213078:12214382:-.A.se_chr3L:12257721:12258010:-@chr3L:12233753:12233774:-@chr3L:12213078:12214382:-.A.up','chr3L:12257721:12258010:-@chr3L:12233753:12233774:-@chr3L:12213078:12214382:-.B.dn_chr3L:12257721:12258010:-@chr3L:12233753:12233774:-@chr3L:122130…	(0,0):627,(0,1):14,(1,0):15,(1,1):294	0:128,1:195	(0,0):601,(0,1):18,(1,0):3,(1,1):317	0:51,1:287	chr3L	-	1221307812213070	1225801012258010
chrX:6985707:6986155:-@chrX:6982611:6982800:-@chrX:6981647:6981692:-	se	0.14	0.09	0.19	0.31	0.22	0.41	-0.17	26.56	'chrX:6985707:6986155:-@chrX:6982611:6982800:-@chrX:6981647:6981692:-.A.dn_chrX:6985707:6986155:-@chrX:6982611:6982800:-@chrX:6981647:6981692:-.A.se_chrX:6985707:6986155:-@chrX:6982611:6982800:-@chrX:6981647:6981692:-.A.up','chrX:6985707:6986155:-@chrX:6982611:6982800:-@chrX:6981647:6981692:-.B.dn_chrX:6985707:6986155:-@chrX:6982611:6982800:-@chrX:6981647:6981692:-.B.up'	(0,0):472,(0,1):11,(1,0):29,(1,1):304	0:76,1:268	(0,0):428,(0,1):5,(1,0):45,(1,1):214	0:119,1:145	chrX	-	69816476981647	69861556986155
chr3R:7417717:7417734:-@chr3R:7417223:7417633:-@chr3R:7416894:7417029:-	se	0.57	0.39	0.76	0.92	0.74	0.99	-0.35	24.51	'chr3R:7417717:7417734:-@chr3R:7417223:7417633:-@chr3R:7416894:7417029:-.A.dn_chr3R:7417717:7417734:-@chr3R:7417223:7417633:-@chr3R:7416894:7417029:-.A.se_chr3R:7417717:7417734:-@chr3R:7417223:7417633:-@chr3R:7416894:7417029:-.A.up','chr3R:7417717:7417734:-@chr3R:7417223:7417633:-@chr3R:7416894:7417029:-.B.dn_chr3R:7417717:7417734:-@chr3R:7417223:7417633:-@chr3R:7416894:7417029:-.B.up'	(0,0):183,(0,1):2,(1,0):166,(1,1):11	0:175,1:4	(0,0):372,(1,0):451,(1,1):13	0:463,1:1	chr3R	-	74168947416894	74177347417734
chr3L:7360659:7361084:-@chr3L:7359542:7359616:-@chr3L:7357900:7358061:-	se	0.27	0.2	0.35	0.12	0.08	0.17	0.15	19.72	'chr3L:7360659:7361084:-@chr3L:7359542:7359616:-@chr3L:7357900:7358061:-.A.dn_chr3L:7360659:7361084:-@chr3L:7359542:7359616:-@chr3L:7357900:7358061:-.A.se_chr3L:7360659:7361084:-@chr3L:7359542:7359616:-@chr3L:7357900:7358061:-.A.up','chr3L:7360659:7361084:-@chr3L:7359542:7359616:-@chr3L:7357900:7358061:-.B.dn_chr3L:7360659:7361084:-@chr3L:7359542:7359616:-@chr3L:7357900:7358061:-.B.up'	(0,0):2352,(1,0):46,(1,1):912	0:358,1:600	(0,0):2849,(1,0):30,(1,1):1336	0:227,1:1139	chr3L	-	73579007357900	73610847361084
chr3L:1872582:1872735:-@chr3L:1872354:1872470:-@chr3L:1871528:1871917:-	se	0.62	0.5	0.75	0.36	0.27	0.47	0.26	16.68	'chr3L:1872582:1872735:-@chr3L:1872354:1872470:-@chr3L:1871528:1871917:-.A.dn_chr3L:1872582:1872735:-@chr3L:1872354:1872470:-@chr3L:1871528:1871917:-.A.se_chr3L:1872582:1872735:-@chr3L:1872354:1872470:-@chr3L:1871528:1871917:-.A.up','chr3L:1872582:1872735:-@chr3L:1872354:1872470:-@chr3L:1871528:1871917:-.B.dn_chr3L:1872582:1872735:-@chr3L:1872354:1872470:-@chr3L:1871528:1871917:-.B.up'	(0,0):27,(0,1):9,(1,0):43,(1,1):46	0:66,1:32	(0,0):42,(0,1):15,(1,0):38,(1,1):89	0:63,1:79	chr3L	-	18715281871528	18727351872735
chr3L:12196819:12197320:-@chr3L:12194879:12194962:-@chr3L:12194474:12194596:-	se	0.58	0.42	0.71	0.22	0.12	0.36	0.36	16.65	'chr3L:12196819:12197320:-@chr3L:12194879:12194962:-@chr3L:12194474:12194596:-.A.dn_chr3L:12196819:12197320:-@chr3L:12194879:12194962:-@chr3L:12194474:12194596:-.A.se_chr3L:12196819:12197320:-@chr3L:12194879:12194962:-@chr3L:12194474:12194596:-.A.up','chr3L:12196819:12197320:-@chr3L:12194879:12194962:-@chr3L:12194474:12194596:-.B.dn_chr3L:12196819:12197320:-@chr3L:12194879:12194962:-@chr3L:121944…	(0,0):71,(0,1):12,(1,0):31,(1,1):58	0:69,1:32	(0,0):22,(0,1):12,(1,0):9,(1,1):97	0:35,1:83	chr3L	-	1219447412194470	1219732012197320
chr2R:4842239:4842356:+@chr2R:4842464:4842672:+@chr2R:4846612:4846839:+	se	0.71	0.35	0.99	0.13	0.04	0.32	0.58	14.95	'chr2R:4842239:4842356:+@chr2R:4842464:4842672:+@chr2R:4846612:4846839:+.A.up_chr2R:4842239:4842356:+@chr2R:4842464:4842672:+@chr2R:4846612:4846839:+.A.se_chr2R:4842239:4842356:+@chr2R:4842464:4842672:+@chr2R:4846612:4846839:+.A.dn','chr2R:4842239:4842356:+@chr2R:4842464:4842672:+@chr2R:4846612:4846839:+.B.up_chr2R:4842239:4842356:+@chr2R:4842464:4842672:+@chr2R:4846612:4846839:+.B.dn'	(0,0):244,(1,0):7,(1,1):5	0:9,1:3	(0,0):213,(1,0):3,(1,1):22	0:5,1:20	chr2R	+	48422394842239	48468394846839
chr2L:8927678:8927707:+@chr2L:8928060:8928743:+@chr2L:8928990:8929663:+	se	0.63	0.52	0.77	0.42	0.35	0.51	0.21	13.92	'chr2L:8927678:8927707:+@chr2L:8928060:8928743:+@chr2L:8928990:8929663:+.A.up_chr2L:8927678:8927707:+@chr2L:8928060:8928743:+@chr2L:8928990:8929663:+.A.se_chr2L:8927678:8927707:+@chr2L:8928060:8928743:+@chr2L:8928990:8929663:+.A.dn','chr2L:8927678:8927707:+@chr2L:8928060:8928743:+@chr2L:8928990:8929663:+.B.up_chr2L:8927678:8927707:+@chr2L:8928060:8928743:+@chr2L:8928990:8929663:+.B.dn'	(0,0):30,(0,1):1,(1,0):150,(1,1):173	0:264,1:60	(0,0):37,(0,1):4,(1,0):150,(1,1):255	0:240,1:169	chr2L	+	89276788927678	89296638929663
chr2R:2822928:2823185:-@chr2R:2822720:2822800:-@chr2R:2822311:2822613:-	se	0.7	0.53	0.85	0.38	0.19	0.59	0.32	11.6	'chr2R:2822928:2823185:-@chr2R:2822720:2822800:-@chr2R:2822311:2822613:-.A.dn_chr2R:2822928:2823185:-@chr2R:2822720:2822800:-@chr2R:2822311:2822613:-.A.se_chr2R:2822928:2823185:-@chr2R:2822720:2822800:-@chr2R:2822311:2822613:-.A.up','chr2R:2822928:2823185:-@chr2R:2822720:2822800:-@chr2R:2822311:2822613:-.B.dn_chr2R:2822928:2823185:-@chr2R:2822720:2822800:-@chr2R:2822311:2822613:-.B.up'	(0,0):19,(0,1):4,(1,0):17,(1,1):13	0:24,1:10	(0,0):18,(0,1):8,(1,0):7,(1,1):14	0:11,1:18	chr2R	-	28223112822311	28231852823185
chr3R:8042603:8043268:-@chr3R:8042355:8042408:-@chr3R:8041331:8041675:-	se	0.25	0.11	0.4	0.04	0	0.11	0.21	9.45	'chr3R:8042603:8043268:-@chr3R:8042355:8042408:-@chr3R:8041331:8041675:-.A.dn_chr3R:8042603:8043268:-@chr3R:8042355:8042408:-@chr3R:8041331:8041675:-.A.se_chr3R:8042603:8043268:-@chr3R:8042355:8042408:-@chr3R:8041331:8041675:-.A.up','chr3R:8042603:8043268:-@chr3R:8042355:8042408:-@chr3R:8041331:8041675:-.B.dn_chr3R:8042603:8043268:-@chr3R:8042355:8042408:-@chr3R:8041331:8041675:-.B.up'	(0,0):19,(0,1):13,(1,0):8,(1,1):146	0:42,1:125	(0,0):24,(0,1):28,(1,0):1,(1,1):197	0:2,1:224	chr3R	-	80413318041331	80432688043268
chr3L:1517586:1517755:+@chr3L:1517987:1518052:+@chr3L:1518177:1518796:+	se	0.06	0.02	0.13	0.21	0.13	0.33	-0.15	7.18	'chr3L:1517586:1517755:+@chr3L:1517987:1518052:+@chr3L:1518177:1518796:+.A.up_chr3L:1517586:1517755:+@chr3L:1517987:1518052:+@chr3L:1518177:1518796:+.A.se_chr3L:1517586:1517755:+@chr3L:1517987:1518052:+@chr3L:1518177:1518796:+.A.dn','chr3L:1517586:1517755:+@chr3L:1517987:1518052:+@chr3L:1518177:1518796:+.B.up_chr3L:1517586:1517755:+@chr3L:1517987:1518052:+@chr3L:1518177:1518796:+.B.dn'	(0,0):308,(0,1):2,(1,0):3,(1,1):550	0:31,1:524	(0,0):353,(0,1):7,(1,0):17,(1,1):627	0:151,1:500	chr3L	+	15175861517586	15187961518796
chr2L:19388040:19388313:-@chr2L:19387862:19387936:-@chr2L:19387538:19387769:-	se	0.23	0.11	0.38	0.58	0.36	0.77	-0.35	6.75	'chr2L:19388040:19388313:-@chr2L:19387862:19387936:-@chr2L:19387538:19387769:-.A.dn_chr2L:19388040:19388313:-@chr2L:19387862:19387936:-@chr2L:19387538:19387769:-.A.se_chr2L:19388040:19388313:-@chr2L:19387862:19387936:-@chr2L:19387538:19387769:-.A.up','chr2L:19388040:19388313:-@chr2L:19387862:19387936:-@chr2L:19387538:19387769:-.B.dn_chr2L:19388040:19388313:-@chr2L:19387862:19387936:-@chr2L:193875…	(0,0):27,(0,1):14,(1,0):9,(1,1):31	0:14,1:40	(0,0):14,(0,1):6,(1,0):14,(1,1):13	0:20,1:13	chr2L	-	1938753819387530	1938831319388310
chr2L:13175667:13175952:-@chr2L:13174439:13175276:-@chr2L:13172643:13173941:-	se	0.36	0.27	0.48	0.6	0.47	0.75	-0.24	6.57	'chr2L:13175667:13175952:-@chr2L:13174439:13175276:-@chr2L:13172643:13173941:-.A.dn_chr2L:13175667:13175952:-@chr2L:13174439:13175276:-@chr2L:13172643:13173941:-.A.se_chr2L:13175667:13175952:-@chr2L:13174439:13175276:-@chr2L:13172643:13173941:-.A.up','chr2L:13175667:13175952:-@chr2L:13174439:13175276:-@chr2L:13172643:13173941:-.B.dn_chr2L:13175667:13175952:-@chr2L:13174439:13175276:-@chr2L:131726…	(0,0):28,(0,1):3,(1,0):48,(1,1):209	0:123,1:137	(0,0):32,(0,1):5,(1,0):82,(1,1):197	0:207,1:77	chr2L	-	1317264313172640	1317595213175950
chr2L:13383737:13384022:+@chr2L:13384657:13384794:+@chr2L:13384987:13385674:+	se	0.57	0.4	0.75	0.29	0.2	0.41	0.28	6.47	'chr2L:13383737:13384022:+@chr2L:13384657:13384794:+@chr2L:13384987:13385674:+.A.up_chr2L:13383737:13384022:+@chr2L:13384657:13384794:+@chr2L:13384987:13385674:+.A.se_chr2L:13383737:13384022:+@chr2L:13384657:13384794:+@chr2L:13384987:13385674:+.A.dn','chr2L:13383737:13384022:+@chr2L:13384657:13384794:+@chr2L:13384987:13385674:+.B.up_chr2L:13383737:13384022:+@chr2L:13384657:13384794:+@chr2L:133849…	(0,0):75,(0,1):2,(1,0):29,(1,1):200	0:142,1:89	(0,0):113,(0,1):5,(1,0):24,(1,1):317	0:114,1:232	chr2L	+	1338373713383730	1338567413385670
chr2L:22820170:22820497:+@chr2L:22831506:22831574:+@chr2L:22832086:22832272:+	se	0.8	0.56	0.97	0.43	0.27	0.61	0.37	6.44	'chr2L:22820170:22820497:+@chr2L:22831506:22831574:+@chr2L:22832086:22832272:+.A.up_chr2L:22820170:22820497:+@chr2L:22831506:22831574:+@chr2L:22832086:22832272:+.A.se_chr2L:22820170:22820497:+@chr2L:22831506:22831574:+@chr2L:22832086:22832272:+.A.dn','chr2L:22820170:22820497:+@chr2L:22831506:22831574:+@chr2L:22832086:22832272:+.B.up_chr2L:22820170:22820497:+@chr2L:22831506:22831574:+@chr2L:228320…	(0,0):500,(1,0):24,(1,1):127	0:108,1:43	(0,0):597,(0,1):4,(1,0):20,(1,1):157	0:101,1:80	chr2L	+	2282017022820170	2283227222832270
chr2R:10662474:10662763:-@chr2R:10661685:10662150:-@chr2R:10660155:10661512:-	se	0.9	0.64	1	0.47	0.21	0.78	0.43	6.19	'chr2R:10662474:10662763:-@chr2R:10661685:10662150:-@chr2R:10660155:10661512:-.A.dn_chr2R:10662474:10662763:-@chr2R:10661685:10662150:-@chr2R:10660155:10661512:-.A.se_chr2R:10662474:10662763:-@chr2R:10661685:10662150:-@chr2R:10660155:10661512:-.A.up','chr2R:10662474:10662763:-@chr2R:10661685:10662150:-@chr2R:10660155:10661512:-.B.dn_chr2R:10662474:10662763:-@chr2R:10661685:10662150:-@chr2R:106601…	(0,0):3,(1,0):14,(1,1):21	0.0243056	(0,0):10,(0,1):2,(1,0):7,(1,1):34	0:21,1:22	chr2R	-	1066015510660150	1066276310662760
chr3L:23092680:23092823:+@chr3L:23093320:23093457:+@chr3L:23095222:23096544:+	se	0.43	0.35	0.51	0.28	0.22	0.34	0.15	6.08	'chr3L:23092680:23092823:+@chr3L:23093320:23093457:+@chr3L:23095222:23096544:+.A.up_chr3L:23092680:23092823:+@chr3L:23093320:23093457:+@chr3L:23095222:23096544:+.A.se_chr3L:23092680:23092823:+@chr3L:23093320:23093457:+@chr3L:23095222:23096544:+.A.dn','chr3L:23092680:23092823:+@chr3L:23093320:23093457:+@chr3L:23095222:23096544:+.B.up_chr3L:23092680:23092823:+@chr3L:23093320:23093457:+@chr3L:230952…	(0,0):182,(0,1):27,(1,0):102,(1,1):1503	0:770,1:862	(0,0):204,(0,1):36,(1,0):74,(1,1):1826	0:521,1:1415	chr3L	+	2309268023092680	2309654423096540
chr3R:12376417:12376462:+@chr3R:12376583:12376651:+@chr3R:12377517:12377687:+	se	0.26	0.02	0.59	0.8	0.48	0.99	-0.54	5.89	'chr3R:12376417:12376462:+@chr3R:12376583:12376651:+@chr3R:12377517:12377687:+.A.up_chr3R:12376417:12376462:+@chr3R:12376583:12376651:+@chr3R:12377517:12377687:+.A.se_chr3R:12376417:12376462:+@chr3R:12376583:12376651:+@chr3R:12377517:12377687:+.A.dn','chr3R:12376417:12376462:+@chr3R:12376583:12376651:+@chr3R:12377517:12377687:+.B.up_chr3R:12376417:12376462:+@chr3R:12376583:12376651:+@chr3R:123775…	(0,0):22,(1,1):4	0:3,1:1	(0,0):43,(1,0):9,(1,1):1	0.00694444	chr3R	+	1237641712376410	1237768712377680
chr3L:12364644:12364703:-@chr3L:12363979:12364106:-@chr3L:12363335:12363432:-	se	0.13	0.02	0.4	0.55	0.23	0.9	-0.42	5.85	'chr3L:12364644:12364703:-@chr3L:12363979:12364106:-@chr3L:12363335:12363432:-.A.dn_chr3L:12364644:12364703:-@chr3L:12363979:12364106:-@chr3L:12363335:12363432:-.A.se_chr3L:12364644:12364703:-@chr3L:12363979:12364106:-@chr3L:12363335:12363432:-.A.up','chr3L:12364644:12364703:-@chr3L:12363979:12364106:-@chr3L:12363335:12363432:-.B.dn_chr3L:12364644:12364703:-@chr3L:12363979:12364106:-@chr3L:123633…	(0,0):69,(0,1):3,(1,0):2,(1,1):3	0:2,1:6	(0,0):79,(0,1):1,(1,0):8,(1,1):1	0:8,1:2	chr3L	-	1236333512363330	1236470312364700
chr4:1102753:1103842:-@chr4:1100883:1101070:-@chr4:1099199:1099455:-	se	0.63	0.42	0.86	0.24	0.08	0.5	0.39	5.76	'chr4:1102753:1103842:-@chr4:1100883:1101070:-@chr4:1099199:1099455:-.A.dn_chr4:1102753:1103842:-@chr4:1100883:1101070:-@chr4:1099199:1099455:-.A.se_chr4:1102753:1103842:-@chr4:1100883:1101070:-@chr4:1099199:1099455:-.A.up','chr4:1102753:1103842:-@chr4:1100883:1101070:-@chr4:1099199:1099455:-.B.dn_chr4:1102753:1103842:-@chr4:1100883:1101070:-@chr4:1099199:1099455:-.B.up'	(0,0):87,(0,1):2,(1,0):12,(1,1):67	0:54,1:27	(0,0):135,(0,1):2,(1,0):4,(1,1):100	0:29,1:77	chr4	-	10991991099199	11038421103842
chr2RHet:3199633:3200479:+@chr2RHet:3215267:3215562:+@chr2RHet:3234343:3234607:+	se	0.85	0.73	0.95	0.62	0.48	0.75	0.23	5.64	'chr2RHet:3199633:3200479:+@chr2RHet:3215267:3215562:+@chr2RHet:3234343:3234607:+.A.up_chr2RHet:3199633:3200479:+@chr2RHet:3215267:3215562:+@chr2RHet:3234343:3234607:+.A.se_chr2RHet:3199633:3200479:+@chr2RHet:3215267:3215562:+@chr2RHet:3234343:3234607:+.A.dn','chr2RHet:3199633:3200479:+@chr2RHet:3215267:3215562:+@chr2RHet:3234343:3234607:+.B.up_chr2RHet:3199633:3200479:+@chr2RHet:3215267:3215562:…	(0,0):1160,(0,1):3,(1,0):110,(1,1):313	0:393,1:33	(0,0):1242,(0,1):5,(1,0):86,(1,1):391	0:314,1:168	chr2RHet	+	31996333199633	32346073234607
chr2L:2799909:2799947:-@chr2L:2798486:2798836:-@chr2L:2793648:2793908:-	se	0.12	0.08	0.18	0.05	0.03	0.07	0.07	5.52	'chr2L:2799909:2799947:-@chr2L:2798486:2798836:-@chr2L:2793648:2793908:-.A.dn_chr2L:2799909:2799947:-@chr2L:2798486:2798836:-@chr2L:2793648:2793908:-.A.se_chr2L:2799909:2799947:-@chr2L:2798486:2798836:-@chr2L:2793648:2793908:-.A.up','chr2L:2799909:2799947:-@chr2L:2798486:2798836:-@chr2L:2793648:2793908:-.B.dn_chr2L:2799909:2799947:-@chr2L:2798486:2798836:-@chr2L:2793648:2793908:-.B.up'	(0,0):65,(0,1):3,(1,0):31,(1,1):78	0:36,1:76	(0,0):170,(0,1):8,(1,0):25,(1,1):160	0:38,1:155	chr2L	-	27936482793648	27999472799947
chr3L:7528643:7528744:+@chr3L:7529811:7529869:+@chr3L:7530076:7530479:+	se	0.11	0.06	0.22	0.29	0.2	0.4	-0.18	5.47	'chr3L:7528643:7528744:+@chr3L:7529811:7529869:+@chr3L:7530076:7530479:+.A.up_chr3L:7528643:7528744:+@chr3L:7529811:7529869:+@chr3L:7530076:7530479:+.A.se_chr3L:7528643:7528744:+@chr3L:7529811:7529869:+@chr3L:7530076:7530479:+.A.dn','chr3L:7528643:7528744:+@chr3L:7529811:7529869:+@chr3L:7530076:7530479:+.B.up_chr3L:7528643:7528744:+@chr3L:7529811:7529869:+@chr3L:7530076:7530479:+.B.dn'	(0,0):155,(0,1):17,(1,0):8,(1,1):231	0:21,1:235	(0,0):251,(0,1):16,(1,0):28,(1,1):298	0:118,1:224	chr3L	+	75286437528643	75304797530479
chr3R:5600042:5600141:-@chr3R:5599460:5599700:-@chr3R:5599286:5599357:-	se	0.32	0.11	0.66	0.77	0.36	0.99	-0.45	5.45	'chr3R:5600042:5600141:-@chr3R:5599460:5599700:-@chr3R:5599286:5599357:-.A.dn_chr3R:5600042:5600141:-@chr3R:5599460:5599700:-@chr3R:5599286:5599357:-.A.se_chr3R:5600042:5600141:-@chr3R:5599460:5599700:-@chr3R:5599286:5599357:-.A.up','chr3R:5600042:5600141:-@chr3R:5599460:5599700:-@chr3R:5599286:5599357:-.B.dn_chr3R:5600042:5600141:-@chr3R:5599460:5599700:-@chr3R:5599286:5599357:-.B.up'	(0,0):17,(0,1):3,(1,0):7	0:7,1:3	(0,0):24,(1,0):12	0.00833333	chr3R	-	55992865599286	56001415600141
chr3R:7801821:7802217:-@chr3R:7801650:7801765:-@chr3R:7800878:7801035:-	se	0.41	0.23	0.6	0.11	0.03	0.26	0.3	5.07	'chr3R:7801821:7802217:-@chr3R:7801650:7801765:-@chr3R:7800878:7801035:-.A.dn_chr3R:7801821:7802217:-@chr3R:7801650:7801765:-@chr3R:7800878:7801035:-.A.se_chr3R:7801821:7802217:-@chr3R:7801650:7801765:-@chr3R:7800878:7801035:-.A.up','chr3R:7801821:7802217:-@chr3R:7801650:7801765:-@chr3R:7800878:7801035:-.B.dn_chr3R:7801821:7802217:-@chr3R:7801650:7801765:-@chr3R:7800878:7801035:-.B.up'	(0,0):211,(0,1):1,(1,0):17,(1,1):119	0:65,1:72	(0,0):280,(1,0):3,(1,1):132	0:14,1:121	chr3R	-	78008787800878	78022177802217
chr2R:8191067:8191269:-@chr2R:8190908:8190999:-@chr2R:8190539:8190841:-	se	0.23	0.15	0.33	0.39	0.32	0.46	-0.16	4.72	'chr2R:8191067:8191269:-@chr2R:8190908:8190999:-@chr2R:8190539:8190841:-.A.dn_chr2R:8191067:8191269:-@chr2R:8190908:8190999:-@chr2R:8190539:8190841:-.A.se_chr2R:8191067:8191269:-@chr2R:8190908:8190999:-@chr2R:8190539:8190841:-.A.up','chr2R:8191067:8191269:-@chr2R:8190908:8190999:-@chr2R:8190539:8190841:-.B.dn_chr2R:8191067:8191269:-@chr2R:8190908:8190999:-@chr2R:8190539:8190841:-.B.up'	(0,0):68,(0,1):22,(1,0):23,(1,1):114	0:38,1:121	(0,0):148,(0,1):35,(1,0):97,(1,1):265	0:176,1:221	chr2R	-	81905398190539	81912698191269
chr3L:9442789:9442924:+@chr3L:9443118:9443168:+@chr3L:9443332:9443886:+	se	0.72	0.53	0.92	0.44	0.31	0.58	0.28	4.62	'chr3L:9442789:9442924:+@chr3L:9443118:9443168:+@chr3L:9443332:9443886:+.A.up_chr3L:9442789:9442924:+@chr3L:9443118:9443168:+@chr3L:9443332:9443886:+.A.se_chr3L:9442789:9442924:+@chr3L:9443118:9443168:+@chr3L:9443332:9443886:+.A.dn','chr3L:9442789:9442924:+@chr3L:9443118:9443168:+@chr3L:9443332:9443886:+.B.up_chr3L:9442789:9442924:+@chr3L:9443118:9443168:+@chr3L:9443332:9443886:+.B.dn'	(0,0):31,(1,0):28,(1,1):145	0:114,1:59	(0,0):56,(0,1):15,(1,0):29,(1,1):223	0:140,1:127	chr3L	+	94427899442789	94438869443886
chr2L:14848005:14848254:-@chr2L:14846790:14847057:-@chr2L:14845753:14846494:-	se	0.26	0.13	0.42	0.55	0.37	0.74	-0.29	4.49	'chr2L:14848005:14848254:-@chr2L:14846790:14847057:-@chr2L:14845753:14846494:-.A.dn_chr2L:14848005:14848254:-@chr2L:14846790:14847057:-@chr2L:14845753:14846494:-.A.se_chr2L:14848005:14848254:-@chr2L:14846790:14847057:-@chr2L:14845753:14846494:-.A.up','chr2L:14848005:14848254:-@chr2L:14846790:14847057:-@chr2L:14845753:14846494:-.B.dn_chr2L:14848005:14848254:-@chr2L:14846790:14847057:-@chr2L:148457…	(0,0):39,(0,1):11,(1,0):9,(1,1):63	0:29,1:54	(0,0):21,(0,1):5,(1,0):18,(1,1):53	0:52,1:24	chr2L	-	1484575314845750	1484825414848250
chr2L:6329548:6329697:+@chr2L:6330123:6330563:+@chr2L:6330771:6330810:+	se	0.78	0.42	0.97	0.34	0.12	0.74	0.44	4.41	'chr2L:6329548:6329697:+@chr2L:6330123:6330563:+@chr2L:6330771:6330810:+.A.up_chr2L:6329548:6329697:+@chr2L:6330123:6330563:+@chr2L:6330771:6330810:+.A.se_chr2L:6329548:6329697:+@chr2L:6330123:6330563:+@chr2L:6330771:6330810:+.A.dn','chr2L:6329548:6329697:+@chr2L:6330123:6330563:+@chr2L:6330771:6330810:+.B.up_chr2L:6329548:6329697:+@chr2L:6330123:6330563:+@chr2L:6330771:6330810:+.B.dn'	(0,0):12,(1,0):15	0.0104167	(0,0):15,(0,1):2,(1,0):12,(1,1):2	0:12,1:4	chr2L	+	63295486329548	63308106330810
chr2L:5799118:5799272:-@chr2L:5787965:5787984:-@chr2L:5770951:5771209:-	se	0.88	0.67	0.99	0.61	0.44	0.78	0.27	4.39	'chr2L:5799118:5799272:-@chr2L:5787965:5787984:-@chr2L:5770951:5771209:-.A.dn_chr2L:5799118:5799272:-@chr2L:5787965:5787984:-@chr2L:5770951:5771209:-.A.se_chr2L:5799118:5799272:-@chr2L:5787965:5787984:-@chr2L:5770951:5771209:-.A.up','chr2L:5799118:5799272:-@chr2L:5787965:5787984:-@chr2L:5770951:5771209:-.B.dn_chr2L:5799118:5799272:-@chr2L:5787965:5787984:-@chr2L:5770951:5771209:-.B.up'	(0,0):481,(1,0):12,(1,1):26	0:35,1:3	(0,0):617,(0,1):9,(1,0):18,(1,1):32	0:37,1:22	chr2L	-	57709515770951	57992725799272
chr2R:1861003:1861398:-@chr2R:1857663:1860626:-@chr2R:1857253:1857500:-	se	0.59	0.42	0.79	0.89	0.73	1	-0.3	4.36	'chr2R:1861003:1861398:-@chr2R:1857663:1860626:-@chr2R:1857253:1857500:-.A.dn_chr2R:1861003:1861398:-@chr2R:1857663:1860626:-@chr2R:1857253:1857500:-.A.se_chr2R:1861003:1861398:-@chr2R:1857663:1860626:-@chr2R:1857253:1857500:-.A.up','chr2R:1861003:1861398:-@chr2R:1857663:1860626:-@chr2R:1857253:1857500:-.B.dn_chr2R:1861003:1861398:-@chr2R:1857663:1860626:-@chr2R:1857253:1857500:-.B.up'	(0,0):11,(1,0):202,(1,1):55	0:234,1:23	(0,0):16,(1,0):247,(1,1):34	0:280,1:1	chr2R	-	18572531857253	18613981861398
chr3L:21697648:21699447:-@chr3L:21687416:21687604:-@chr3L:21685903:21686821:-	se	0.27	0.04	0.7	0.81	0.52	0.99	-0.54	4.35	'chr3L:21697648:21699447:-@chr3L:21687416:21687604:-@chr3L:21685903:21686821:-.A.dn_chr3L:21697648:21699447:-@chr3L:21687416:21687604:-@chr3L:21685903:21686821:-.A.se_chr3L:21697648:21699447:-@chr3L:21687416:21687604:-@chr3L:21685903:21686821:-.A.up','chr3L:21697648:21699447:-@chr3L:21687416:21687604:-@chr3L:21685903:21686821:-.B.dn_chr3L:21697648:21699447:-@chr3L:21687416:21687604:-@chr3L:216859…	(0,0):62,(1,0):1,(1,1):71	0:14,1:58	(0,0):56,(1,0):9,(1,1):73	0:78,1:4	chr3L	-	2168590321685900	2169944721699440
chr4:260940:261024:+@chr4:263087:263305:+@chr4:263892:264211:+	se	0.15	0.04	0.3	0.46	0.24	0.75	-0.31	4.32	'chr4:260940:261024:+@chr4:263087:263305:+@chr4:263892:264211:+.A.up_chr4:260940:261024:+@chr4:263087:263305:+@chr4:263892:264211:+.A.se_chr4:260940:261024:+@chr4:263087:263305:+@chr4:263892:264211:+.A.dn','chr4:260940:261024:+@chr4:263087:263305:+@chr4:263892:264211:+.B.up_chr4:260940:261024:+@chr4:263087:263305:+@chr4:263892:264211:+.B.dn'	(0,0):187,(0,1):4,(1,0):5,(1,1):31	0:8,1:32	(0,0):178,(0,1):2,(1,0):13,(1,1):24	0:21,1:18	chr4	+	260940260940	264211264211
chr2L:5093445:5093590:-@chr2L:5092875:5092901:-@chr2L:5078462:5079574:-	se	0.69	0.4	0.97	0.33	0.19	0.47	0.36	4.12	'chr2L:5093445:5093590:-@chr2L:5092875:5092901:-@chr2L:5078462:5079574:-.A.dn_chr2L:5093445:5093590:-@chr2L:5092875:5092901:-@chr2L:5078462:5079574:-.A.se_chr2L:5093445:5093590:-@chr2L:5092875:5092901:-@chr2L:5078462:5079574:-.A.up','chr2L:5093445:5093590:-@chr2L:5092875:5092901:-@chr2L:5078462:5079574:-.B.dn_chr2L:5093445:5093590:-@chr2L:5092875:5092901:-@chr2L:5078462:5079574:-.B.up'	(0,0):400,(1,0):12,(1,1):617	0:467,1:162	(0,0):468,(0,1):13,(1,0):13,(1,1):803	0:228,1:601	chr2L	-	50784625078462	50935905093590
chr2R:13416127:13416357:-@chr2R:13415818:13415880:-@chr2R:13415328:13415610:-	se	0.96	0.87	0.99	0.81	0.7	0.9	0.15	4.07	'chr2R:13416127:13416357:-@chr2R:13415818:13415880:-@chr2R:13415328:13415610:-.A.dn_chr2R:13416127:13416357:-@chr2R:13415818:13415880:-@chr2R:13415328:13415610:-.A.se_chr2R:13416127:13416357:-@chr2R:13415818:13415880:-@chr2R:13415328:13415610:-.A.up','chr2R:13416127:13416357:-@chr2R:13415818:13415880:-@chr2R:13415328:13415610:-.B.dn_chr2R:13416127:13416357:-@chr2R:13415818:13415880:-@chr2R:134153…	(0,0):40,(1,0):43,(1,1):59	0:93,1:9	(0,0):40,(0,1):6,(1,0):55,(1,1):63	0:97,1:27	chr2R	-	1341532813415320	1341635713416350
chr2L:10351715:10352025:-@chr2L:10348660:10348973:-@chr2L:10347843:10348196:-	se	0.4	0.14	0.86	0.84	0.59	0.97	-0.44	3.77	'chr2L:10351715:10352025:-@chr2L:10348660:10348973:-@chr2L:10347843:10348196:-.A.dn_chr2L:10351715:10352025:-@chr2L:10348660:10348973:-@chr2L:10347843:10348196:-.A.se_chr2L:10351715:10352025:-@chr2L:10348660:10348973:-@chr2L:10347843:10348196:-.A.up','chr2L:10351715:10352025:-@chr2L:10348660:10348973:-@chr2L:10347843:10348196:-.B.dn_chr2L:10351715:10352025:-@chr2L:10348660:10348973:-@chr2L:103478…	(0,0):10,(1,0):4,(1,1):20	0:7,1:17	(0,0):24,(1,0):21,(1,1):24	0.03125	chr2L	-	1034784310347840	1035202510352020
chr3L:7921017:7921217:-@chr3L:7920860:7920920:-@chr3L:7919673:7919937:-	se	0.43	0.27	0.63	0.18	0.09	0.3	0.25	3.38	'chr3L:7921017:7921217:-@chr3L:7920860:7920920:-@chr3L:7919673:7919937:-.A.dn_chr3L:7921017:7921217:-@chr3L:7920860:7920920:-@chr3L:7919673:7919937:-.A.se_chr3L:7921017:7921217:-@chr3L:7920860:7920920:-@chr3L:7919673:7919937:-.A.up','chr3L:7921017:7921217:-@chr3L:7920860:7920920:-@chr3L:7919673:7919937:-.B.dn_chr3L:7921017:7921217:-@chr3L:7920860:7920920:-@chr3L:7919673:7919937:-.B.up'	(0,0):66,(0,1):5,(1,0):14,(1,1):48	0:33,1:34	(0,0):81,(0,1):14,(1,0):9,(1,1):74	0:13,1:84	chr3L	-	79196737919673	79212177921217
chr3R:11780809:11780927:+@chr3R:11783313:11783641:+@chr3R:11785042:11785270:+	se	0.65	0.4	0.92	0.31	0.16	0.51	0.34	3.32	'chr3R:11780809:11780927:+@chr3R:11783313:11783641:+@chr3R:11785042:11785270:+.A.up_chr3R:11780809:11780927:+@chr3R:11783313:11783641:+@chr3R:11785042:11785270:+.A.se_chr3R:11780809:11780927:+@chr3R:11783313:11783641:+@chr3R:11785042:11785270:+.A.dn','chr3R:11780809:11780927:+@chr3R:11783313:11783641:+@chr3R:11785042:11785270:+.B.up_chr3R:11780809:11780927:+@chr3R:11783313:11783641:+@chr3R:117850…	(0,0):142,(0,1):1,(1,0):36,(1,1):21	0:49,1:9	(0,0):145,(1,0):21,(1,1):35	0:30,1:26	chr3R	+	1178080911780800	1178527011785270
chr3L:21697648:21699447:-@chr3L:21687416:21687667:-@chr3L:21685903:21686821:-	se	0.43	0.15	0.83	0.86	0.66	0.98	-0.43	3.2	'chr3L:21697648:21699447:-@chr3L:21687416:21687667:-@chr3L:21685903:21686821:-.A.dn_chr3L:21697648:21699447:-@chr3L:21687416:21687667:-@chr3L:21685903:21686821:-.A.se_chr3L:21697648:21699447:-@chr3L:21687416:21687667:-@chr3L:21685903:21686821:-.A.up','chr3L:21697648:21699447:-@chr3L:21687416:21687667:-@chr3L:21685903:21686821:-.B.dn_chr3L:21697648:21699447:-@chr3L:21687416:21687667:-@chr3L:216859…	(0,0):60,(1,0):3,(1,1):71	0:68,1:6	(0,0):52,(1,0):13,(1,1):73	0:84,1:2	chr3L	-	2168590321685900	2169944721699440
chr2R:15105636:15105699:+@chr2R:15108249:15108287:+@chr2R:15111558:15111891:+	se	0.29	0.02	0.74	0.69	0.41	0.98	-0.4	3.06	'chr2R:15105636:15105699:+@chr2R:15108249:15108287:+@chr2R:15111558:15111891:+.A.up_chr2R:15105636:15105699:+@chr2R:15108249:15108287:+@chr2R:15111558:15111891:+.A.se_chr2R:15105636:15105699:+@chr2R:15108249:15108287:+@chr2R:15111558:15111891:+.A.dn','chr2R:15105636:15105699:+@chr2R:15108249:15108287:+@chr2R:15111558:15111891:+.B.up_chr2R:15105636:15105699:+@chr2R:15108249:15108287:+@chr2R:151115…	(0,0):210,(1,0):1,(1,1):28	0:16,1:13	(0,0):283,(0,1):1,(1,0):9,(1,1):30	0:38,1:2	chr2R	+	1510563615105630	1511189115111890
chr3L:6048274:6048519:+@chr3L:6048690:6048763:+@chr3L:6048817:6049942:+	se	0.72	0.52	0.87	0.96	0.86	1	-0.24	3.05	'chr3L:6048274:6048519:+@chr3L:6048690:6048763:+@chr3L:6048817:6049942:+.A.up_chr3L:6048274:6048519:+@chr3L:6048690:6048763:+@chr3L:6048817:6049942:+.A.se_chr3L:6048274:6048519:+@chr3L:6048690:6048763:+@chr3L:6048817:6049942:+.A.dn','chr3L:6048274:6048519:+@chr3L:6048690:6048763:+@chr3L:6048817:6049942:+.B.up_chr3L:6048274:6048519:+@chr3L:6048690:6048763:+@chr3L:6048817:6049942:+.B.dn'	(0,0):35,(0,1):2,(1,0):23,(1,1):249	0:226,1:48	(0,0):53,(1,0):46,(1,1):370	0:412,1:4	chr3L	+	60482746048274	60499426049942
chr2L:6920793:6920861:+@chr2L:6922731:6922826:+@chr2L:6923784:6924400:+	se	0.82	0.78	0.85	0.75	0.71	0.78	0.07	3.04	'chr2L:6920793:6920861:+@chr2L:6922731:6922826:+@chr2L:6923784:6924400:+.A.up_chr2L:6920793:6920861:+@chr2L:6922731:6922826:+@chr2L:6923784:6924400:+.A.se_chr2L:6920793:6920861:+@chr2L:6922731:6922826:+@chr2L:6923784:6924400:+.A.dn','chr2L:6920793:6920861:+@chr2L:6922731:6922826:+@chr2L:6923784:6924400:+.B.up_chr2L:6920793:6920861:+@chr2L:6922731:6922826:+@chr2L:6923784:6924400:+.B.dn'	(0,0):654,(0,1):70,(1,0):572,(1,1):1035	0:1423,1:254	(0,0):749,(0,1):118,(1,0):669,(1,1):1249	0:1595,1:441	chr2L	+	69207936920793	69244006924400
chr3R:7801821:7802217:-@chr3R:7801650:7801650:-@chr3R:7801146:7801146:-@chr3R:7800878:7801035:-	mxe	0.16	0.1	0.22	0.03	0.01	0.06	0.13	2851.9	'chr3R:7801821:7802217:-@chr3R:7801650:7801650:-@chr3R:7801146:7801146:-@chr3R:7800878:7801035:-.A.dn_chr3R:7801821:7802217:-@chr3R:7801650:7801650:-@chr3R:7801146:7801146:-@chr3R:7800878:7801035:-.A.mxe1_chr3R:7801821:7802217:-@chr3R:7801650:7801650:-@chr3R:7801146:7801146:-@chr3R:7800878:7801035:-.A.up','chr3R:7801821:7802217:-@chr3R:7801650:7801650:-@chr3R:7801146:7801146:-@chr3R:7800878:78010…	(0,0):32,(0,1):180,(1,0):19,(1,1):117	0:46,1:270	(0,0):62,(0,1):218,(1,0):3,(1,1):132	0:4,1:349	chr3R	-	78008787800878	78022177802217
chr2L:8228494:8229011:-@chr2L:8228083:8228083:-@chr2L:8227652:8227652:-@chr2L:8226458:8226606:-	mxe	0.42	0.34	0.5	0.24	0.18	0.3	0.18	113.43	'chr2L:8228494:8229011:-@chr2L:8228083:8228083:-@chr2L:8227652:8227652:-@chr2L:8226458:8226606:-.A.dn_chr2L:8228494:8229011:-@chr2L:8228083:8228083:-@chr2L:8227652:8227652:-@chr2L:8226458:8226606:-.A.mxe1_chr2L:8228494:8229011:-@chr2L:8228083:8228083:-@chr2L:8227652:8227652:-@chr2L:8226458:8226606:-.A.up','chr2L:8228494:8229011:-@chr2L:8228083:8228083:-@chr2L:8227652:8227652:-@chr2L:8226458:82266…	(0,0):146,(0,1):79,(1,0):57,(1,1):158	0:123,1:171	(0,0):235,(0,1):146,(1,0):46,(1,1):212	0:96,1:308	chr2L	-	82264588226458	82290118229011
chr2R:19648376:19648518:-@chr2R:19648145:19648145:-@chr2R:19647249:19647249:-@chr2R:19645999:19646125:-	mxe	0.72	0.49	0.9	0.18	0.02	0.4	0.54	23.34	'chr2R:19648376:19648518:-@chr2R:19648145:19648145:-@chr2R:19647249:19647249:-@chr2R:19645999:19646125:-.A.dn_chr2R:19648376:19648518:-@chr2R:19648145:19648145:-@chr2R:19647249:19647249:-@chr2R:19645999:19646125:-.A.mxe1_chr2R:19648376:19648518:-@chr2R:19648145:19648145:-@chr2R:19647249:19647249:-@chr2R:19645999:19646125:-.A.up','chr2R:19648376:19648518:-@chr2R:19648145:19648145:-@chr2R:19647249:…	(0,0):67,(0,1):4,(1,0):12,(1,1):4	0:14,1:6	(0,0):53,(0,1):8,(1,0):1,(1,1):4	0:1,1:12	chr2R	-	1964599919645990	1964851819648510
chr2L:8228494:8229011:-@chr2L:8228083:8228083:-@chr2L:8227670:8227670:-@chr2L:8226458:8226606:-	mxe	0.42	0.33	0.5	0.25	0.19	0.31	0.17	22.97	'chr2L:8228494:8229011:-@chr2L:8228083:8228083:-@chr2L:8227670:8227670:-@chr2L:8226458:8226606:-.A.dn_chr2L:8228494:8229011:-@chr2L:8228083:8228083:-@chr2L:8227670:8227670:-@chr2L:8226458:8226606:-.A.mxe1_chr2L:8228494:8229011:-@chr2L:8228083:8228083:-@chr2L:8227670:8227670:-@chr2L:8226458:8226606:-.A.up','chr2L:8228494:8229011:-@chr2L:8228083:8228083:-@chr2L:8227670:8227670:-@chr2L:8226458:82266…	(0,0):148,(0,1):77,(1,0):57,(1,1):158	0:115,1:177	(0,0):247,(0,1):134,(1,0):46,(1,1):212	0:117,1:275	chr2L	-	82264588226458	82290118229011
chr3R:7801821:7802217:-@chr3R:7801650:7801650:-@chr3R:7801095:7801095:-@chr3R:7800878:7801035:-	mxe	0.23	0.16	0.33	0.06	0.02	0.12	0.17	20.06	'chr3R:7801821:7802217:-@chr3R:7801650:7801650:-@chr3R:7801095:7801095:-@chr3R:7800878:7801035:-.A.dn_chr3R:7801821:7802217:-@chr3R:7801650:7801650:-@chr3R:7801095:7801095:-@chr3R:7800878:7801035:-.A.mxe1_chr3R:7801821:7802217:-@chr3R:7801650:7801650:-@chr3R:7801095:7801095:-@chr3R:7800878:7801035:-.A.up','chr3R:7801821:7802217:-@chr3R:7801650:7801650:-@chr3R:7801095:7801095:-@chr3R:7800878:78010…	(0,0):78,(0,1):134,(1,0):19,(1,1):117	0:54,1:216	(0,0):121,(0,1):159,(1,0):3,(1,1):132	0:12,1:282	chr3R	-	78008787800878	78022177802217
chr2L:8228494:8229011:-@chr2L:8228083:8228083:-@chr2L:8227652:8227652:-@chr2L:8226458:8226603:-	mxe	0.4	0.31	0.5	0.24	0.17	0.31	0.16	6.9	'chr2L:8228494:8229011:-@chr2L:8228083:8228083:-@chr2L:8227652:8227652:-@chr2L:8226458:8226603:-.A.dn_chr2L:8228494:8229011:-@chr2L:8228083:8228083:-@chr2L:8227652:8227652:-@chr2L:8226458:8226603:-.A.mxe1_chr2L:8228494:8229011:-@chr2L:8228083:8228083:-@chr2L:8227652:8227652:-@chr2L:8226458:8226603:-.A.up','chr2L:8228494:8229011:-@chr2L:8228083:8228083:-@chr2L:8227652:8227652:-@chr2L:8226458:82266…	(0,0):173,(0,1):65,(1,0):44,(1,1):158	0:106,1:161	(0,0):277,(0,1):115,(1,0):35,(1,1):212	0:80,1:282	chr2L	-	82264588226458	82290118229011
chr2L:8228494:8229011:-@chr2L:8228083:8228083:-@chr2L:8227670:8227670:-@chr2L:8226458:8226603:-	mxe	0.39	0.3	0.48	0.23	0.17	0.3	0.16	5.02	'chr2L:8228494:8229011:-@chr2L:8228083:8228083:-@chr2L:8227670:8227670:-@chr2L:8226458:8226603:-.A.dn_chr2L:8228494:8229011:-@chr2L:8228083:8228083:-@chr2L:8227670:8227670:-@chr2L:8226458:8226603:-.A.mxe1_chr2L:8228494:8229011:-@chr2L:8228083:8228083:-@chr2L:8227670:8227670:-@chr2L:8226458:8226603:-.A.up','chr2L:8228494:8229011:-@chr2L:8228083:8228083:-@chr2L:8227670:8227670:-@chr2L:8226458:82266…	(0,0):173,(0,1):65,(1,0):44,(1,1):158	0:103,1:164	(0,0):281,(0,1):111,(1,0):35,(1,1):212	0:89,1:269	chr2L	-	82264588226458	82290118229011

## Sheet: Y107C
Supplemental Table S15: Splicing pattern changes in SmnY107C mutant.
event_name	type	WT_posterior_mean	WT_ci_low	WT_ci_high	Y107C_posterior_mean	Y107C_ci_low	Y107C_ci_high	diff	bayes_factor	isoforms	WT_counts	WT_assigned_counts	Y107C_counts	Y107C_assigned_counts	chrom	strand	mRNA_starts	mRNA_ends
chr3R:7049117:7049252:+@chr3R:7049580:7049969:+	ri	0.72	0.71	0.73	0.67	0.66	0.68	0.05	1000000000000	'chr3R:7049117:7049252:+@chr3R:7049580:7049969:+.A.withRI','chr3R:7049117:7049252:+@chr3R:7049580:7049969:+.B.up_chr3R:7049117:7049252:+@chr3R:7049580:7049969:+.B.dn'	(0,0):1426,(0,1):1903,(1,0):10977,(1,1):1706	0:12199,1:2387	(0,0):1122,(0,1):1546,(1,0):7196,(1,1):1330	0:8083,1:1989	chr3R	+	70491177049117	70499697049969
chr3R:16648524:16648581:+@chr3R:16648854:16649080:+	ri	0.42	0.39	0.45	0.25	0.23	0.28	0.17	1000000000000	'chr3R:16648524:16648581:+@chr3R:16648854:16649080:+.A.withRI','chr3R:16648524:16648581:+@chr3R:16648854:16649080:+.B.up_chr3R:16648524:16648581:+@chr3R:16648854:16649080:+.B.dn'	(0,0):1919,(0,1):198,(1,0):1115,(1,1):468	0:1305,1:476	(0,0):1502,(0,1):148,(1,0):475,(1,1):418	0:581,1:460	chr3R	+	1664852416648520	1664908016649080
chr3L:21660045:21660410:-@chr3L:21659436:21659978:-	ri	0.09	0.08	0.11	0.26	0.23	0.3	-0.17	1000000000000	'chr3L:21660045:21660410:-@chr3L:21659436:21659978:-.A.withRI','chr3L:21660045:21660410:-@chr3L:21659436:21659978:-.B.dn_chr3L:21660045:21660410:-@chr3L:21659436:21659978:-.B.up'	(0,0):29,(0,1):914,(1,0):132,(1,1):3742	0:491,1:4297	(0,0):25,(0,1):363,(1,0):185,(1,1):1833	0:651,1:1730	chr3L	-	2165943621659430	2166041021660410
chr3L:3192969:3193367:+@chr3L:3194499:3197061:+	ri	0.03	0.03	0.04	0.05	0.04	0.05	-0.02	1000000000000	'chr3L:3192969:3193367:+@chr3L:3194499:3197061:+.A.withRI','chr3L:3192969:3193367:+@chr3L:3194499:3197061:+.B.up_chr3L:3192969:3193367:+@chr3L:3194499:3197061:+.B.dn'	(0,0):191,(0,1):1420,(1,0):293,(1,1):17134	0:844,1:18003	(0,0):364,(0,1):1951,(1,0):594,(1,1):23435	0:1828,1:24152	chr3L	+	31929693192969	31970613197061
chr3L:21290816:21291053:-@chr3L:21289851:21290741:-	ri	0.08	0.08	0.09	0.15	0.14	0.16	-0.07	1000000000000	'chr3L:21290816:21291053:-@chr3L:21289851:21290741:-.A.withRI','chr3L:21290816:21291053:-@chr3L:21289851:21290741:-.B.dn_chr3L:21290816:21291053:-@chr3L:21289851:21290741:-.B.up'	(0,0):203,(0,1):1286,(1,0):437,(1,1):17422	0:1706,1:17439	(0,0):129,(0,1):801,(1,0):501,(1,1):10264	0:1832,1:9734	chr3L	-	2128985121289850	2129105321291050
chr2L:21680757:21681284:-@chr2L:21679484:21680180:-	ri	0.15	0.15	0.16	0.13	0.12	0.13	0.02	1000000000000	'chr2L:21680757:21681284:-@chr2L:21679484:21680180:-.A.withRI','chr2L:21680757:21681284:-@chr2L:21679484:21680180:-.B.dn_chr2L:21680757:21681284:-@chr2L:21679484:21680180:-.B.up'	(0,0):917,(0,1):3039,(1,0):2075,(1,1):13819	0:4132,1:14801	(0,0):845,(0,1):2616,(1,0):1438,(1,1):11965	0:2898,1:13121	chr2L	-	2167948421679480	2168128421681280
chr2L:5985026:5985220:+@chr2L:5985343:5985559:+	ri	0.39	0.37	0.41	0.48	0.46	0.51	-0.09	1000000000000	'chr2L:5985026:5985220:+@chr2L:5985343:5985559:+.A.withRI','chr2L:5985026:5985220:+@chr2L:5985343:5985559:+.B.up_chr2L:5985026:5985220:+@chr2L:5985343:5985559:+.B.dn'	(0,0):2401,(0,1):200,(1,0):1444,(1,1):2772	0:2203,1:2213	(0,0):1960,(0,1):177,(1,0):1433,(1,1):2147	0:2218,1:1539	chr2L	+	59850265985026	59855595985559
chr2L:5985026:5985220:+@chr2L:5985339:5985559:+	ri	0.22	0.2	0.23	0.28	0.26	0.29	-0.06	1000000000000	'chr2L:5985026:5985220:+@chr2L:5985339:5985559:+.A.withRI','chr2L:5985026:5985220:+@chr2L:5985339:5985559:+.B.up_chr2L:5985026:5985220:+@chr2L:5985339:5985559:+.B.dn'	(0,0):765,(0,1):1836,(1,0):1368,(1,1):2848	0:1785,1:4267	(0,0):742,(0,1):1395,(1,0):1373,(1,1):2207	0:1847,1:3128	chr2L	+	59850265985026	59855595985559
chr2L:7024150:7024152:-@chr2L:7019135:7019382:-	ri	0.28	0.24	0.33	0.11	0.1	0.14	0.17	1000000000000	'chr2L:7024150:7024152:-@chr2L:7019135:7019382:-.A.withRI','chr2L:7024150:7024152:-@chr2L:7019135:7019382:-.B.dn_chr2L:7024150:7024152:-@chr2L:7019135:7019382:-.B.up'	(0,0):834,(1,0):3118,(1,1):160	0:3152,1:126	(0,0):334,(1,0):1241,(1,1):164	0:1249,1:156	chr2L	-	70191357019135	70241527024152
chr2L:7023529:7023940:-@chr2L:7019135:7019382:-	ri	0.46	0.43	0.49	0.22	0.2	0.25	0.24	1000000000000	'chr2L:7023529:7023940:-@chr2L:7019135:7019382:-.A.withRI','chr2L:7023529:7023940:-@chr2L:7019135:7019382:-.B.dn_chr2L:7023529:7023940:-@chr2L:7019135:7019382:-.B.up'	(0,0):662,(0,1):171,(1,0):2922,(1,1):356	0:3069,1:380	(0,0):201,(0,1):135,(1,0):1062,(1,1):339	0:1144,1:392	chr2L	-	70191357019135	70239407023940
chr2R:12914830:12914940:+@chr2R:12916178:12916526:+	ri	0.97	0.93	1	0.23	0.16	0.32	0.74	1000000000000	'chr2R:12914830:12914940:+@chr2R:12916178:12916526:+.A.withRI','chr2R:12914830:12914940:+@chr2R:12916178:12916526:+.B.up_chr2R:12914830:12914940:+@chr2R:12916178:12916526:+.B.dn'	(0,0):62,(0,1):1,(1,0):802,(1,1):82	0:883,1:2	(0,0):29,(0,1):2,(1,0):68,(1,1):63	0:77,1:56	chr2R	+	1291483012914830	1291652612916520
chr2R:12914830:12914844:+@chr2R:12916178:12916526:+	ri	0.84	0.73	0.94	0.13	0.09	0.18	0.71	1000000000000	'chr2R:12914830:12914844:+@chr2R:12916178:12916526:+.A.withRI','chr2R:12914830:12914844:+@chr2R:12916178:12916526:+.B.up_chr2R:12914830:12914844:+@chr2R:12916178:12916526:+.B.dn'	(0,0):58,(0,1):5,(1,0):803,(1,1):81	0:872,1:17	(0,0):26,(0,1):5,(1,0):68,(1,1):63	0:75,1:61	chr2R	+	1291483012914830	1291652612916520
chr2R:7782456:7782601:+@chr2R:7782661:7782844:+	ri	1	1	1	0.98	0.97	0.98	0.02	1000000000000	'chr2R:7782456:7782601:+@chr2R:7782661:7782844:+.A.withRI','chr2R:7782456:7782601:+@chr2R:7782661:7782844:+.B.up_chr2R:7782456:7782601:+@chr2R:7782661:7782844:+.B.dn'	(0,0):6952,(0,1):1,(1,0):14672,(1,1):5720	0:20380,1:13	(0,0):5861,(0,1):15,(1,0):12340,(1,1):4780	0:16915,1:220	chr2R	+	77824567782456	77828447782844
chr2R:1572309:1572482:-@chr2R:1567271:1568022:-	ri	0.11	0.09	0.13	0.34	0.3	0.39	-0.23	1000000000000	'chr2R:1572309:1572482:-@chr2R:1567271:1568022:-.A.withRI','chr2R:1572309:1572482:-@chr2R:1567271:1568022:-.B.dn_chr2R:1572309:1572482:-@chr2R:1567271:1568022:-.B.up'	(0,0):77,(0,1):42,(1,0):189,(1,1):249	0:221,1:259	(0,0):68,(0,1):28,(1,0):469,(1,1):187	0:531,1:153	chr2R	-	15672711567271	15724821572482
chrX:658335:658556:-@chrX:656648:657024:-	ri	0.12	0.12	0.13	0.09	0.09	0.1	0.03	1000000000000	'chrX:658335:658556:-@chrX:656648:657024:-.A.withRI','chrX:658335:658556:-@chrX:656648:657024:-.B.dn_chrX:658335:658556:-@chrX:656648:657024:-.B.up'	(0,0):1532,(0,1):1676,(1,0):1657,(1,1):1614	0:1868,1:3079	(0,0):1166,(0,1):1476,(1,0):1096,(1,1):1451	0:1243,1:2780	chrX	-	656648656648	658556658556
chrX:6637091:6637181:-@chrX:6635570:6636289:-	ri	0.16	0.15	0.17	0.12	0.11	0.13	0.04	1000000000000	'chrX:6637091:6637181:-@chrX:6635570:6636289:-.A.withRI','chrX:6637091:6637181:-@chrX:6635570:6636289:-.B.dn_chrX:6637091:6637181:-@chrX:6635570:6636289:-.B.up'	(0,0):416,(0,1):1357,(1,0):1468,(1,1):4137	0:2146,1:4816	(0,0):325,(0,1):1061,(1,0):852,(1,1):3223	0:1281,1:3855	chrX	-	66355706635570	66371816637181
chrX:17040831:17041233:-@chrX:17037620:17037804:-	ri	0.19	0.18	0.2	0.15	0.14	0.16	0.04	1000000000000	'chrX:17040831:17041233:-@chrX:17037620:17037804:-.A.withRI','chrX:17040831:17041233:-@chrX:17037620:17037804:-.B.dn_chrX:17040831:17041233:-@chrX:17037620:17037804:-.B.up'	(0,0):8258,(0,1):51,(1,0):4611,(1,1):3039	0:5174,1:2527	(0,0):6708,(0,1):32,(1,0):3001,(1,1):2561	0:3413,1:2181	chrX	-	1703762017037620	1704123317041230
chrX:13447125:13447297:-@chrX:13446833:13447033:-	ri	0.03	0.03	0.04	0.1	0.08	0.12	-0.07	1000000000000	'chrX:13447125:13447297:-@chrX:13446833:13447033:-.A.withRI','chrX:13447125:13447297:-@chrX:13446833:13447033:-.B.dn_chrX:13447125:13447297:-@chrX:13446833:13447033:-.B.up'	(0,0):627,(0,1):516,(1,0):64,(1,1):1082	0:81,1:1581	(0,0):396,(0,1):305,(1,0):110,(1,1):675	0:157,1:933	chrX	-	1344683313446830	1344729713447290
chrX:17040831:17041233:-@chrX:17039049:17039165:-	ri	0.1	0.09	0.1	0.08	0.07	0.08	0.02	1000000000000	'chrX:17040831:17041233:-@chrX:17039049:17039165:-.A.withRI','chrX:17040831:17041233:-@chrX:17039049:17039165:-.B.dn_chrX:17040831:17041233:-@chrX:17039049:17039165:-.B.up'	(0,0):2669,(0,1):2013,(1,0):2811,(1,1):2837	0:3063,1:4598	(0,0):2101,(0,1):1736,(1,0):1866,(1,1):2412	0:2054,1:3960	chrX	-	1703904917039040	1704123317041230
chr4:691873:692013:+@chr4:701066:701220:+	ri	0.12	0.07	0.2	0.85	0.59	0.98	-0.73	1000000000000	'chr4:691873:692013:+@chr4:701066:701220:+.A.withRI','chr4:691873:692013:+@chr4:701066:701220:+.B.up_chr4:691873:692013:+@chr4:701066:701220:+.B.dn'	(0,0):20,(0,1):2,(1,0):134,(1,1):12	0:135,1:13	(0,0):24,(1,0):380,(1,1):1	0.264583	chr4	+	691873691873	701220701220
chr3L:11284138:11284209:-@chr3L:11281755:11282754:-	ri	0.11	0.06	0.16	0.46	0.33	0.61	-0.35	7.53661e+10	'chr3L:11284138:11284209:-@chr3L:11281755:11282754:-.A.withRI','chr3L:11284138:11284209:-@chr3L:11281755:11282754:-.B.dn_chr3L:11284138:11284209:-@chr3L:11281755:11282754:-.B.up'	(0,0):8,(0,1):7,(1,0):17,(1,1):93	0:28,1:89	(0,0):4,(0,1):3,(1,0):67,(1,1):87	0:100,1:57	chr3L	-	1128175511281750	1128420911284200
chr3L:3070162:3070939:-@chr3L:3058066:3058124:-	ri	0.09	0.07	0.11	0.21	0.17	0.27	-0.12	4.7092e+10	'chr3L:3070162:3070939:-@chr3L:3058066:3058124:-.A.withRI','chr3L:3070162:3070939:-@chr3L:3058066:3058124:-.B.dn_chr3L:3070162:3070939:-@chr3L:3058066:3058124:-.B.up'	(0,0):27,(0,1):7,(1,0):235,(1,1):130	0:244,1:128	(0,0):23,(0,1):5,(1,0):453,(1,1):108	0:476,1:90	chr3L	-	30580663058066	30709393070939
chr2R:4043560:4044232:-@chr2R:4034422:4035900:-	ri	0.19	0.16	0.22	0.09	0.08	0.12	0.1	9.97711e+09	'chr2R:4043560:4044232:-@chr2R:4034422:4035900:-.A.withRI','chr2R:4043560:4044232:-@chr2R:4034422:4035900:-.B.dn_chr2R:4043560:4044232:-@chr2R:4034422:4035900:-.B.up'	(0,0):39,(0,1):14,(1,0):299,(1,1):379	0:371,1:321	(0,0):19,(0,1):14,(1,0):111,(1,1):289	0:147,1:267	chr2R	-	40344224034422	40442324044232
chr2R:7782456:7782601:+@chr2R:7782658:7782844:+	ri	1	1	1	0.98	0.98	0.99	0.02	1.4224e+08	'chr2R:7782456:7782601:+@chr2R:7782658:7782844:+.A.withRI','chr2R:7782456:7782601:+@chr2R:7782658:7782844:+.B.up_chr2R:7782456:7782601:+@chr2R:7782658:7782844:+.B.dn'	(0,0):6952,(0,1):1,(1,0):14474,(1,1):5918	0:20389,1:4	(0,0):5861,(0,1):15,(1,0):12168,(1,1):4952	0:16957,1:178	chr2R	+	77824567782456	77828447782844
chr2R:2520500:2520708:-@chr2R:2519532:2519644:-	ri	0.09	0.08	0.1	0.15	0.13	0.17	-0.06	1.9178e+07	'chr2R:2520500:2520708:-@chr2R:2519532:2519644:-.A.withRI','chr2R:2520500:2520708:-@chr2R:2519532:2519644:-.B.dn_chr2R:2520500:2520708:-@chr2R:2519532:2519644:-.B.up'	(0,0):613,(0,1):348,(1,0):290,(1,1):33	0:291,1:380	(0,0):470,(0,1):242,(1,0):338,(1,1):18	0:340,1:258	chr2R	-	25195322519532	25207082520708
chr3R:26402901:26403023:+@chr3R:26403084:26403280:+	ri	0.87	0.84	0.9	0.95	0.93	0.98	-0.08	4022498	'chr3R:26402901:26403023:+@chr3R:26403084:26403280:+.A.withRI','chr3R:26402901:26403023:+@chr3R:26403084:26403280:+.B.up_chr3R:26402901:26403023:+@chr3R:26403084:26403280:+.B.dn'	(0,0):339,(0,1):36,(1,0):1170,(1,1):990	0:2005,1:191	(0,0):287,(0,1):8,(1,0):999,(1,1):778	0:1701,1:84	chr3R	+	2640290126402900	2640328026403280
chr2R:6471469:6471628:+@chr2R:6498055:6499020:+	ri	0.05	0.05	0.06	0.08	0.07	0.09	-0.03	3.20444e+06	'chr2R:6471469:6471628:+@chr2R:6498055:6499020:+.A.withRI','chr2R:6471469:6471628:+@chr2R:6498055:6499020:+.B.up_chr2R:6471469:6471628:+@chr2R:6498055:6499020:+.B.dn'	(0,0):74,(0,1):17,(1,0):544,(1,1):352	0:563,1:350	(0,0):54,(0,1):10,(1,0):744,(1,1):310	0:772,1:292	chr2R	+	64714696471469	64990206499020
chr2L:5985026:5985220:+@chr2L:5985290:5985559:+	ri	0.4	0.38	0.42	0.49	0.46	0.51	-0.09	1.66688e+06	'chr2L:5985026:5985220:+@chr2L:5985290:5985559:+.A.withRI','chr2L:5985026:5985220:+@chr2L:5985290:5985559:+.B.up_chr2L:5985026:5985220:+@chr2L:5985290:5985559:+.B.dn'	(0,0):2442,(0,1):159,(1,0):1061,(1,1):3155	0:1902,1:2473	(0,0):1980,(0,1):157,(1,0):1072,(1,1):2508	0:2039,1:1698	chr2L	+	59850265985026	59855595985559
chr2R:16981261:16981417:+@chr2R:16987720:16988996:+	ri	0.23	0.18	0.3	0.1	0.08	0.13	0.13	92289	'chr2R:16981261:16981417:+@chr2R:16987720:16988996:+.A.withRI','chr2R:16981261:16981417:+@chr2R:16987720:16988996:+.B.up_chr2R:16981261:16981417:+@chr2R:16987720:16988996:+.B.dn'	(0,0):15,(0,1):7,(1,0):127,(1,1):98	0:161,1:71	(0,0):25,(0,1):19,(1,0):110,(1,1):194	0:129,1:194	chr2R	+	1698126116981260	1698899616988990
chr2R:6471375:6471453:+@chr2R:6498055:6499020:+	ri	0.05	0.05	0.06	0.08	0.07	0.09	-0.03	84422.8	'chr2R:6471375:6471453:+@chr2R:6498055:6499020:+.A.withRI','chr2R:6471375:6471453:+@chr2R:6498055:6499020:+.B.up_chr2R:6471375:6471453:+@chr2R:6498055:6499020:+.B.dn'	(0,0):82,(0,1):10,(1,0):574,(1,1):346	0:589,1:341	(0,0):71,(0,1):4,(1,0):766,(1,1):303	0:785,1:288	chr2R	+	64713756471375	64990206499020
chr2R:12533387:12534610:+@chr2R:12538318:12539492:+	ri	0.29	0.17	0.45	0.87	0.62	1	-0.58	33061	'chr2R:12533387:12534610:+@chr2R:12538318:12539492:+.A.withRI','chr2R:12533387:12534610:+@chr2R:12538318:12539492:+.B.up_chr2R:12533387:12534610:+@chr2R:12538318:12539492:+.B.dn'	(0,0):4,(1,0):24,(1,1):51	0:37,1:38	(0,0):1,(1,0):20,(1,1):6	0:25,1:1	chr2R	+	1253338712533380	1253949212539490
chr2R:2520500:2520708:-@chr2R:2519532:2519645:-	ri	0.07	0.06	0.08	0.11	0.09	0.12	-0.04	23160.9	'chr2R:2520500:2520708:-@chr2R:2519532:2519645:-.A.withRI','chr2R:2520500:2520708:-@chr2R:2519532:2519645:-.B.dn_chr2R:2520500:2520708:-@chr2R:2519532:2519645:-.B.up'	(0,0):471,(0,1):490,(1,0):290,(1,1):33	0:294,1:519	(0,0):347,(0,1):365,(1,0):338,(1,1):18	0:340,1:381	chr2R	-	25195322519532	25207082520708
chr2L:19572500:19572711:-@chr2L:19567899:19569226:-	ri	0.44	0.4	0.5	0.3	0.27	0.35	0.14	23130.5	'chr2L:19572500:19572711:-@chr2L:19567899:19569226:-.A.withRI','chr2L:19572500:19572711:-@chr2L:19567899:19569226:-.B.dn_chr2L:19572500:19572711:-@chr2L:19567899:19569226:-.B.up'	(0,0):109,(0,1):1,(1,0):627,(1,1):579	0:881,1:326	(0,0):90,(0,1):3,(1,0):406,(1,1):545	0:602,1:352	chr2L	-	1956789919567890	1957271119572710
chrX:18758872:18759752:+@chrX:18765667:18765906:+	ri	0.11	0.09	0.14	0.05	0.03	0.06	0.06	13922.7	'chrX:18758872:18759752:+@chrX:18765667:18765906:+.A.withRI','chrX:18758872:18759752:+@chrX:18765667:18765906:+.B.up_chrX:18758872:18759752:+@chrX:18765667:18765906:+.B.dn'	(0,0):33,(0,1):12,(1,0):143,(1,1):188	0:161,1:182	(0,0):23,(0,1):7,(1,0):49,(1,1):158	0:60,1:154	chrX	+	1875887218758870	1876590618765900
chrX:11700277:11700394:-@chrX:11698930:11699075:-	ri	0.03	0.03	0.04	0.06	0.05	0.07	-0.03	4635.02	'chrX:11700277:11700394:-@chrX:11698930:11699075:-.A.withRI','chrX:11700277:11700394:-@chrX:11698930:11699075:-.B.dn_chrX:11700277:11700394:-@chrX:11698930:11699075:-.B.up'	(0,0):479,(0,1):208,(1,0):152,(1,1):64	0:154,1:270	(0,0):552,(0,1):187,(1,0):244,(1,1):68	0:247,1:252	chrX	-	1169893011698930	1170039411700390
chr2L:1161290:1161869:-@chr2L:1160290:1161219:-	ri	0	0	0.01	0.03	0.02	0.04	-0.03	2671.94	'chr2L:1161290:1161869:-@chr2L:1160290:1161219:-.A.withRI','chr2L:1161290:1161869:-@chr2L:1160290:1161219:-.B.dn_chr2L:1161290:1161869:-@chr2L:1160290:1161219:-.B.up'	(0,0):257,(0,1):420,(1,0):1,(1,1):4835	0:13,1:5243	(0,0):163,(0,1):226,(1,0):12,(1,1):3033	0:55,1:3216	chr2L	-	11602901160290	11618691161869
chr2R:8757760:8757835:+@chr2R:8757908:8759608:+	ri	0.1	0.07	0.12	0.18	0.15	0.22	-0.08	2267.43	'chr2R:8757760:8757835:+@chr2R:8757908:8759608:+.A.withRI','chr2R:8757760:8757835:+@chr2R:8757908:8759608:+.B.up_chr2R:8757760:8757835:+@chr2R:8757908:8759608:+.B.dn'	(0,0):52,(0,1):253,(1,0):54,(1,1):4011	0:499,1:3819	(0,0):58,(0,1):208,(1,0):86,(1,1):3082	0:680,1:2696	chr2R	+	87577608757760	87596088759608
chr2L:19572143:19572236:-@chr2L:19567899:19569226:-	ri	0.43	0.38	0.48	0.29	0.25	0.33	0.14	2034.48	'chr2L:19572143:19572236:-@chr2L:19567899:19569226:-.A.withRI','chr2L:19572143:19572236:-@chr2L:19567899:19569226:-.B.dn_chr2L:19572143:19572236:-@chr2L:19567899:19569226:-.B.up'	(0,0):109,(1,0):587,(1,1):577	0:841,1:323	(0,0):89,(1,0):369,(1,1):542	0:519,1:392	chr2L	-	1956789919567890	1957223619572230
chr2L:8042469:8042613:-@chr2L:8041771:8042125:-	ri	0.24	0.23	0.25	0.29	0.27	0.31	-0.05	1662.53	'chr2L:8042469:8042613:-@chr2L:8041771:8042125:-.A.withRI','chr2L:8042469:8042613:-@chr2L:8041771:8042125:-.B.dn_chr2L:8042469:8042613:-@chr2L:8041771:8042125:-.B.up'	(0,0):5272,(0,1):1515,(1,0):1344,(1,1):1194	0:1607,1:2446	(0,0):3946,(0,1):1005,(1,0):1150,(1,1):883	0:1383,1:1655	chr2L	-	80417718041771	80426138042613
chr2L:58081:58182:-@chr2L:39301:39857:-	ri	0.35	0.31	0.39	0.53	0.46	0.61	-0.18	1465.31	'chr2L:58081:58182:-@chr2L:39301:39857:-.A.withRI','chr2L:58081:58182:-@chr2L:39301:39857:-.B.dn_chr2L:58081:58182:-@chr2L:39301:39857:-.B.up'	(0,0):117,(0,1):46,(1,0):3478,(1,1):183	0:3551,1:156	(0,0):74,(0,1):15,(1,0):2577,(1,1):92	0:2626,1:58	chr2L	-	3930139301	5818258182
chrX:12097865:12098011:+@chrX:12098172:12098442:+	ri	0.92	0.81	0.98	0.57	0.44	0.7	0.35	1125.39	'chrX:12097865:12098011:+@chrX:12098172:12098442:+.A.withRI','chrX:12097865:12098011:+@chrX:12098172:12098442:+.B.up_chrX:12097865:12098011:+@chrX:12098172:12098442:+.B.dn'	(0,0):40,(0,1):1,(1,0):96,(1,1):68	0:153,1:12	(0,0):40,(0,1):5,(1,0):60,(1,1):83	0:105,1:43	chrX	+	1209786512097860	1209844212098440
chrX:17039049:17039165:-@chrX:17038651:17038749:-	ri	0.14	0.13	0.16	0.11	0.09	0.12	0.03	962.28	'chrX:17039049:17039165:-@chrX:17038651:17038749:-.A.withRI','chrX:17039049:17039165:-@chrX:17038651:17038749:-.B.dn_chrX:17039049:17039165:-@chrX:17038651:17038749:-.B.up'	(0,0):797,(0,1):716,(1,0):807,(1,1):2	0:807,1:718	(0,0):672,(0,1):600,(1,0):466,(1,1):5	0:466,1:605	chrX	-	1703865117038650	1703916517039160
chr2R:8757760:8757834:+@chr2R:8757908:8759608:+	ri	0.19	0.15	0.24	0.37	0.3	0.43	-0.18	790.69	'chr2R:8757760:8757834:+@chr2R:8757908:8759608:+.A.withRI','chr2R:8757760:8757834:+@chr2R:8757908:8759608:+.B.up_chr2R:8757760:8757834:+@chr2R:8757908:8759608:+.B.dn'	(0,0):298,(0,1):7,(1,0):57,(1,1):4008	0:907,1:3165	(0,0):259,(0,1):7,(1,0):87,(1,1):3081	0:1007,1:2168	chr2R	+	87577608757760	87596088759608
chr2L:19571572:19571767:-@chr2L:19567899:19569226:-	ri	0.33	0.3	0.38	0.21	0.18	0.25	0.12	450.71	'chr2L:19571572:19571767:-@chr2L:19567899:19569226:-.A.withRI','chr2L:19571572:19571767:-@chr2L:19567899:19569226:-.B.dn_chr2L:19571572:19571767:-@chr2L:19567899:19569226:-.B.up'	(0,0):83,(0,1):34,(1,0):421,(1,1):635	0:654,1:436	(0,0):60,(0,1):29,(1,0):243,(1,1):591	0:388,1:475	chr2L	-	1956789919567890	1957176719571760
chr2L:19577186:19577324:-@chr2L:19567899:19569226:-	ri	0.22	0.2	0.25	0.17	0.15	0.18	0.05	410.63	'chr2L:19577186:19577324:-@chr2L:19567899:19569226:-.A.withRI','chr2L:19577186:19577324:-@chr2L:19567899:19569226:-.B.dn_chr2L:19577186:19577324:-@chr2L:19567899:19569226:-.B.up'	(0,0):149,(0,1):34,(1,0):882,(1,1):579	0:1039,1:456	(0,0):124,(0,1):39,(1,0):616,(1,1):542	0:703,1:494	chr2L	-	1956789919567890	1957732419577320
chr2L:18443153:18443200:-@chr2L:18442505:18443070:-	ri	0	0	0.01	0.02	0.01	0.03	-0.02	266.75	'chr2L:18443153:18443200:-@chr2L:18442505:18443070:-.A.withRI','chr2L:18443153:18443200:-@chr2L:18442505:18443070:-.B.dn_chr2L:18443153:18443200:-@chr2L:18442505:18443070:-.B.up'	(0,0):704,(0,1):605,(1,0):6,(1,1):4212	0:26,1:4797	(0,0):534,(0,1):432,(1,0):23,(1,1):3598	0:118,1:3935	chr2L	-	1844250518442500	1844320018443200
chr3R:2125681:2125886:+@chr3R:2125941:2126730:+	ri	0.06	0.04	0.08	0.12	0.09	0.15	-0.06	256.5	'chr3R:2125681:2125886:+@chr3R:2125941:2126730:+.A.withRI','chr3R:2125681:2125886:+@chr3R:2125941:2126730:+.B.up_chr3R:2125681:2125886:+@chr3R:2125941:2126730:+.B.dn'	(0,0):360,(0,1):405,(1,0):50,(1,1):2724	0:223,1:2956	(0,0):244,(0,1):273,(1,0):66,(1,1):1733	0:307,1:1765	chr3R	+	21256812125681	21267302126730
chr4:692216:692242:+@chr4:701066:701220:+	ri	0.04	0.02	0.08	0.66	0.24	0.94	-0.62	199	'chr4:692216:692242:+@chr4:701066:701220:+.A.withRI','chr4:692216:692242:+@chr4:701066:701220:+.B.up_chr4:692216:692242:+@chr4:701066:701220:+.B.dn'	(0,0):13,(1,0):111,(1,1):12	0:112,1:11	(0,0):17,(1,0):356,(1,1):1	0:356,1:1	chr4	+	692216692216	701220701220
chr2L:7402905:7402985:+@chr2L:7403229:7403361:+	ri	0.45	0.42	0.48	0.55	0.52	0.59	-0.1	180.12	'chr2L:7402905:7402985:+@chr2L:7403229:7403361:+.A.withRI','chr2L:7402905:7402985:+@chr2L:7403229:7403361:+.B.up_chr2L:7402905:7402985:+@chr2L:7403229:7403361:+.B.dn'	(0,0):156,(0,1):312,(1,0):1549,(1,1):44	0:1570,1:335	(0,0):134,(0,1):173,(1,0):1266,(1,1):29	0:1282,1:186	chr2L	+	74029057402905	74033617403361
chrX:19532913:19533109:+@chrX:19533178:19533426:+	ri	0.57	0.43	0.72	0.91	0.82	0.98	-0.34	137.42	'chrX:19532913:19533109:+@chrX:19533178:19533426:+.A.withRI','chrX:19532913:19533109:+@chrX:19533178:19533426:+.B.up_chrX:19532913:19533109:+@chrX:19533178:19533426:+.B.dn'	(0,0):14,(0,1):11,(1,0):37,(1,1):70	0:80,1:38	(0,0):14,(0,1):2,(1,0):55,(1,1):44	0:89,1:12	chrX	+	1953291319532910	1953342619533420
chr3R:5375310:5375532:-@chr3R:5372520:5373092:-	ri	0.85	0.71	0.98	0.53	0.42	0.66	0.32	134.34	'chr3R:5375310:5375532:-@chr3R:5372520:5373092:-.A.withRI','chr3R:5375310:5375532:-@chr3R:5372520:5373092:-.B.dn_chr3R:5375310:5375532:-@chr3R:5372520:5373092:-.B.up'	(0,0):64,(1,0):312,(1,1):96	0:406,1:2	(0,0):56,(1,0):204,(1,1):107	0:269,1:42	chr3R	-	53725205372520	53755325375532
chr2R:14244597:14244766:-@chr2R:14243036:14243560:-	ri	0.43	0.35	0.51	0.74	0.61	0.87	-0.31	109.87	'chr2R:14244597:14244766:-@chr2R:14243036:14243560:-.A.withRI','chr2R:14244597:14244766:-@chr2R:14243036:14243560:-.B.dn_chr2R:14244597:14244766:-@chr2R:14243036:14243560:-.B.up'	(0,0):78,(0,1):30,(1,0):144,(1,1):84	0:162,1:96	(0,0):51,(0,1):6,(1,0):165,(1,1):71	0:218,1:24	chr2R	-	1424303614243030	1424476614244760
chr3L:14030355:14030521:+@chr3L:14030578:14030850:+	ri	0.29	0.11	0.55	0.78	0.56	0.95	-0.49	89.03	'chr3L:14030355:14030521:+@chr3L:14030578:14030850:+.A.withRI','chr3L:14030355:14030521:+@chr3L:14030578:14030850:+.B.up_chr3L:14030355:14030521:+@chr3L:14030578:14030850:+.B.dn'	(0,0):49,(1,0):7,(1,1):114	0:35,1:86	(0,0):52,(1,0):26,(1,1):119	0:91,1:54	chr3L	+	1403035514030350	1403085014030850
chr2L:8157062:8157256:+@chr2L:8157537:8157948:+	ri	0.16	0.08	0.27	0.55	0.35	0.77	-0.39	63.57	'chr2L:8157062:8157256:+@chr2L:8157537:8157948:+.A.withRI','chr2L:8157062:8157256:+@chr2L:8157537:8157948:+.B.up_chr2L:8157062:8157256:+@chr2L:8157537:8157948:+.B.dn'	(0,0):14,(0,1):16,(1,0):7,(1,1):24	0:11,1:36	(0,0):3,(0,1):5,(1,0):18,(1,1):22	0:25,1:20	chr2L	+	81570628157062	81579488157948
chr2R:4720209:4720375:+@chr2R:4722457:4722606:+	ri	0.77	0.44	0.96	0.18	0.07	0.35	0.59	63.36	'chr2R:4720209:4720375:+@chr2R:4722457:4722606:+.A.withRI','chr2R:4720209:4720375:+@chr2R:4722457:4722606:+.B.up_chr2R:4720209:4720375:+@chr2R:4722457:4722606:+.B.dn'	(0,0):9,(1,0):24	0.0166667	(0,0):5,(0,1):6,(1,0):16	0:16,1:6	chr2R	+	47202094720209	47226064722606
chr3R:27435042:27435796:-@chr3R:27427138:27427952:-	ri	0.12	0.11	0.12	0.14	0.13	0.15	-0.02	59.62	'chr3R:27435042:27435796:-@chr3R:27427138:27427952:-.A.withRI','chr3R:27435042:27435796:-@chr3R:27427138:27427952:-.B.dn_chr3R:27435042:27435796:-@chr3R:27427138:27427952:-.B.up'	(0,0):351,(0,1):301,(1,0):1800,(1,1):2573	0:2105,1:2569	(0,0):267,(0,1):211,(1,0):1625,(1,1):1984	0:1899,1:1921	chr3R	-	2742713827427130	2743579627435790
chr3L:5544228:5544251:-@chr3L:5543884:5544011:-	ri	0.36	0.28	0.44	0.61	0.5	0.73	-0.25	58.54	'chr3L:5544228:5544251:-@chr3L:5543884:5544011:-.A.withRI','chr3L:5544228:5544251:-@chr3L:5543884:5544011:-.B.dn_chr3L:5544228:5544251:-@chr3L:5543884:5544011:-.B.up'	(0,0):30,(0,1):34,(1,0):195,(1,1):8	0:200,1:37	(0,0):34,(0,1):13,(1,0):227,(1,1):8	0:227,1:21	chr3L	-	55438845543884	55442515544251
chr3R:5377293:5377368:-@chr3R:5372520:5373092:-	ri	0.55	0.44	0.69	0.3	0.24	0.38	0.25	58.27	'chr3R:5377293:5377368:-@chr3R:5372520:5373092:-.A.withRI','chr3R:5377293:5377368:-@chr3R:5372520:5373092:-.B.dn_chr3R:5377293:5377368:-@chr3R:5372520:5373092:-.B.up'	(0,0):73,(1,0):432,(1,1):85	0:488,1:29	(0,0):61,(0,1):1,(1,0):274,(1,1):99	0:300,1:74	chr3R	-	53725205372520	53773685377368
chr3L:7134465:7134702:+@chr3L:7134827:7134978:+	ri	0.09	0.03	0.21	0.48	0.26	0.71	-0.39	57.84	'chr3L:7134465:7134702:+@chr3L:7134827:7134978:+.A.withRI','chr3L:7134465:7134702:+@chr3L:7134827:7134978:+.B.up_chr3L:7134465:7134702:+@chr3L:7134827:7134978:+.B.dn'	(0,0):29,(0,1):6,(1,0):3,(1,1):30	0:5,1:34	(0,0):33,(0,1):1,(1,0):12,(1,1):16	0:16,1:13	chr3L	+	71344657134465	71349787134978
chr2R:9339433:9339531:+@chr2R:9339827:9340240:+	ri	0.14	0.06	0.28	0.57	0.32	0.84	-0.43	47.11	'chr2R:9339433:9339531:+@chr2R:9339827:9340240:+.A.withRI','chr2R:9339433:9339531:+@chr2R:9339827:9340240:+.B.up_chr2R:9339433:9339531:+@chr2R:9339827:9340240:+.B.dn'	(0,0):9,(0,1):7,(1,0):5,(1,1):30	0:7,1:35	(0,0):2,(1,0):14,(1,1):26	0:28,1:12	chr2R	+	93394339339433	93402409340240
chr2L:21124443:21124521:+@chr2L:21125317:21125439:+	ri	0.58	0.23	0.94	0.06	0.02	0.14	0.52	45.77	'chr2L:21124443:21124521:+@chr2L:21125317:21125439:+.A.withRI','chr2L:21124443:21124521:+@chr2L:21125317:21125439:+.B.up_chr2L:21124443:21124521:+@chr2L:21125317:21125439:+.B.dn'	(0,0):21,(1,0):14	0.00972222	(0,0):18,(0,1):7,(1,0):5	0:5,1:7	chr2L	+	2112444321124440	2112543921125430
chr2L:21311914:21312043:+@chr2L:21312098:21312208:+	ri	0.06	0.04	0.09	0.15	0.11	0.19	-0.09	43.74	'chr2L:21311914:21312043:+@chr2L:21312098:21312208:+.A.withRI','chr2L:21311914:21312043:+@chr2L:21312098:21312208:+.B.up_chr2L:21311914:21312043:+@chr2L:21312098:21312208:+.B.dn'	(0,0):225,(0,1):109,(1,0):23,(1,1):164	0:26,1:270	(0,0):184,(0,1):96,(1,0):49,(1,1):115	0:56,1:204	chr2L	+	2131191421311910	2131220821312200
chr3L:8353893:8354031:-@chr3L:8351656:8351815:-	ri	0.34	0.22	0.48	0.76	0.5	0.95	-0.42	42.9	'chr3L:8353893:8354031:-@chr3L:8351656:8351815:-.A.withRI','chr3L:8353893:8354031:-@chr3L:8351656:8351815:-.B.dn_chr3L:8353893:8354031:-@chr3L:8351656:8351815:-.B.up'	(0,0):12,(0,1):8,(1,0):109,(1,1):4	0:110,1:11	(0,0):18,(0,1):2,(1,0):100	0:100,1:2	chr3L	-	83516568351656	83540318354031
chr3R:11188874:11189037:-@chr3R:11188514:11188805:-	ri	0.6	0.43	0.77	0.95	0.83	1	-0.35	41.13	'chr3R:11188874:11189037:-@chr3R:11188514:11188805:-.A.withRI','chr3R:11188874:11189037:-@chr3R:11188514:11188805:-.B.dn_chr3R:11188874:11189037:-@chr3R:11188514:11188805:-.B.up'	(0,0):14,(0,1):1,(1,0):25,(1,1):44	0:46,1:24	(0,0):11,(1,0):35,(1,1):34	0.0479167	chr3R	-	1118851411188510	1118903711189030
chr3L:19292496:19292650:-@chr3L:19291635:19292237:-	ri	0.03	0.01	0.06	0.15	0.08	0.22	-0.12	40.87	'chr3L:19292496:19292650:-@chr3L:19291635:19292237:-.A.withRI','chr3L:19292496:19292650:-@chr3L:19291635:19292237:-.B.dn_chr3L:19292496:19292650:-@chr3L:19291635:19292237:-.B.up'	(0,0):15,(0,1):58,(1,0):4,(1,1):139	0:4,1:197	(0,0):14,(0,1):29,(1,0):13,(1,1):103	0:31,1:114	chr3L	-	1929163519291630	1929265019292650
[truncated: 390 more rows]

## Sheet: T205I
Supplemental Table S16: Splicing pattern changes in SmnT205I mutant.
[truncated: 491 more rows]
