# Supplementary material
Source: HighWire-hosted journal article supplement (doi:10.1101/rna.057208.116)
Supplement: Supplemental_Tables_S17-S21.xlsx [file Supplemental_Tables_S17-S21.xlsx]

## Sheet: FPKM_heatmat
Supplemental Table S17: FPKMs of differentially expressed mRNAs in Smn missense mutant lines
		WT	V72G	Y107C	T205I
1	Act57B	188.286	92.6338	120.258	121.253
2	Act79B	12.6327	7.59955	15.1098	14.7402
3	Actn3	5.87403	12.64	5.42424	7.1978
4	ACXA,ACXB,ACXC	10.9272	24.4975	10.9521	13.3408
5	ACXD	3.51323	1.29726	2.90982	3.01726
6	Adgf-E	3.13417	6.8813	2.23409	3.93326
7	Adh,Adhr	124.439	53.8982	178.676	108.666
8	Adk2	48.249	25.9621	39.5452	43.8117
9	ALiX	46.0843	86.2052	65.2001	57.2127
10	alpha-Est1	14.4402	7.4552	13.1007	14.4224
11	alpha-Est2	2.59397	0.933548	1.17305	3.40787
12	alpha-Est6	4.40094	9.78005	3.2729	5.45757
13	alpha-Est8	6.52453	1.52613	3.04168	4.24538
14	alphaTub85E	9.66622	19.7771	9.54405	10.6116
15	Amyrel	3.17693	0.671431	0.495503	0.772694
16	Ance-4	269.075	25.6667	220.767	221.452
17	And	21.4193	50.2481	26.5887	27.0478
18	Aph-4	7.30559	23.869	18.4779	12.3844
19	aralar1	12.3308	25.042	21.0346	14.1842
20	Arp53D	16.5863	36.199	15.5404	18.8872
21	Atg8b	17.5621	42.8536	22.4398	23.3537
22	AttA,AttB	112.667	675.266	623.255	275.659
23	AttC	6.22279	81.9062	53.0284	7.17568
24	AttD	19.6849	71.7358	58.0694	21.2105
25	b	21.3641	85.3081	68.2909	48.7476
26	Best2,Mdr65	47.6698	26.4743	38.415	43.3376
27	beta4GalNAcTA	16.6523	8.12161	14.9812	15.135
28	betaTub85D	67.0943	147.399	72.9939	81.4942
29	BicC	3.51949	8.77481	4.63642	4.36588
30	c-cup	13.7016	25.5561	10.6526	13.1399
31	Ca-beta,Vm32E	2.34329	7.65282	3.48591	2.30054
32	CAH2	35.3252	25.7626	48.8531	36.3842
33	cbt	33.89	19.4521	25.8292	33.5539
34	Ccp84Aa	8.69018	3.23917	12.7909	7.49733
35	Ccp84Ae	76.5916	25.1534	74.3086	65.6758
36	Ccp84Ag	14.1811	4.51081	12.7375	8.71139
37	Cct2	10.5748	20.9362	10.3442	10.5747
38	Cda4	165.324	73.2063	133.68	147.516
39	CecA1	290.629	412.013	391.438	201.557
40	CecA2	192.941	244.302	297.453	134.878
41	CecB	101.859	95.6915	137.088	65.3961
42	CecC	138.843	150.829	169.738	89.457
43	CG10014	6.99714	17.7183	10.4644	9.00567
44	CG10064	7.35565	16.7374	7.76725	7.672
45	CG10131	64.2184	19.758	53.5504	57.738
46	CG10164	13.4387	28.9955	13.354	15.0366
47	CG10175	39.9378	18.2033	28.1831	30.9799
48	CG10177	10.8916	23.278	10.2046	12.3747
49	CG10202	3.20725	8.68035	3.77471	3.87284
50	CG10237	99.818	19.4895	70.4166	86.4684
51	CG10252	76.3732	160.055	74.8558	83.1098
52	CG10311	29.8849	12.0091	17.592	26.3033
53	CG10345	11.064	2.42911	9.27235	12.6855
54	CG10396	34.7432	68.0042	32.6962	42.2266
55	CG10459,CG1773	47.0004	34.8484	20.2427	48.1006
56	CG10514	5.83564	1.43534	2.30289	2.69897
57	CG10570	174.848	38.9782	88.298	191.215
58	CG10588	2.01089	4.09995	2.01052	1.98636
59	CG10625	98.4403	52.3173	105.707	119.157
60	CG10630	13.1623	29.1616	12.631	20.1312
61	CG10657	158.227	77.8307	111.964	138.385
62	CG10734	32.5928	72.9294	32.2221	44.4206
63	CG10749	5.93561	14.6607	7.09664	7.45419
64	CG10750	8.44262	16.438	5.89256	9.51288
65	CG10853	208.641	69.0825	172.311	184.422
66	CG10859	17.5964	39.3199	17.7713	19.4052
67	CG10862	12.9143	27.8096	13.4056	15.0568
68	CG10863	86.1791	35.6041	59.8301	78.2889
69	CG10869	23.5887	52.8227	23.4257	26.2105
70	CG10910	1.03223	10.2608	2.92558	2.73331
71	CG10924	15.1886	33.2495	19.5281	19.0297
72	CG10950	6.76045	15.9802	6.18948	8.45229
73	CG10962	93.7851	60.964	119.156	115.641
74	CG11043	18.3632	40.1494	19.3205	20.4749
75	CG11073	8.43616	4.88703	8.50777	9.33511
76	CG11089	203.925	350.516	236.727	203.874
77	CG11106	16.5032	39.8649	15.2028	17.822
78	CG11125	12.1948	28.9139	14.2102	15.186
79	CG11147	27.0954	13.2047	23.0742	23.5717
80	CG11192	80.8349	32.7793	92.42	88.8919
81	CG1124	96.2038	11.961	45.32	84.2267
82	CG11251	4.59302	11.9599	5.19792	6.11701
83	CG11262	5.79399	11.7845	4.59436	6.21824
84	CG11275	9.88558	3.22959	7.73443	6.88197
85	CG11309	31.7233	13.6629	29.2662	31.594
86	CG11321	4.54207	0.457743	0.337297	0.231331
87	CG11322	3.1356	6.52622	1.9692	3.09064
88	CG11353	12.0453	4.42952	8.08023	9.21426
89	CG11370	12.479	5.88109	14.5619	11.6214
90	CG11588	17.0015	39.9185	13.0458	19.0413
91	CG11594	17.1869	6.68694	10.536	12.4188
92	CG11634	3.38777	7.80639	2.09595	3.19644
93	CG11703	6.55409	15.1754	5.74893	6.5421
94	CG11741	13.2299	1.17026	5.69069	6.30553
95	CG11755,CG8043	15.3695	26.2108	12.7805	14.4375
96	CG11816	568.425	249.411	502.851	582.869
97	CG11842	4.30167	0	2.69274	3.73407
98	CG11852	31.6584	6.48516	16.3108	22.8133
99	CG11892	27.6101	11.9224	18.163	19.5209
100	CG11893	17.9495	31.8444	43.3574	33.2282
101	CG11912	62.0648	32.4446	5.24416	15.1434
102	CG11929	7.55528	16.8519	6.99573	8.24647
103	CG11951	0.367025	1.95952	0.828951	1.265
104	CG11983	4.13298	9.0081	4.00955	4.49715
105	CG12027	16.9709	38.7203	13.5917	18.1009
106	CG12030	57.16	37.3514	54.9774	59.3228
107	CG12063	12.7649	24.6622	19.6854	16.5902
108	CG12069,Pka-C2	6.86069	17.4255	6.49656	8.67827
109	CG1208,glob3	12.1175	24.6531	9.94247	11.6718
110	CG1213	26.7091	8.54479	17.2518	17.7297
111	CG12147	4.02913	8.2281	4.90465	3.89574
112	CG12164	1644.14	744.383	1058.01	1507.67
113	CG12209	5.20007	16.3597	6.92338	7.69906
114	CG12229	11.8439	25.9963	11.1331	13.8781
115	CG12268	173.53	54.2019	137.708	147.599
116	CG12307	11.4605	30.8606	15.5298	15.4275
117	CG12309	21.985	48.6761	22.2709	23.7418
118	CG1236	134.288	83.8537	122.309	135.676
119	CG12376	6.31318	13.7255	5.00806	6.76358
120	CG12481	198.811	4.28448	151.824	171.422
121	CG12617	22.7471	61.948	23.8343	35.7368
122	CG12620	6.37911	14.3051	6.14405	6.63511
123	CG12655	18.6481	59.3901	29.0568	25.2612
124	CG12681	6.22573	14.2773	6.08078	6.66349
125	CG12692	6.69286	14.8495	5.70026	6.67571
126	CG12699	140.147	317.243	144.918	171.269
127	CG12811	122.43	53.1879	81.8109	115.075
128	CG12814	31.7054	15.8403	25.5237	25.4712
129	CG12831	5.94489	13.7707	7.43553	6.71637
130	CG12853	50.2569	120.048	43.6559	61.9663
131	CG12860	27.3401	66.2204	30.128	34.6545
132	CG12861	48.1885	116.164	45.1164	56.0108
133	CG1288	23.8853	60.0341	28.2535	33.2412
134	CG12902	36.5458	89.3262	37.5298	44.5097
135	CG12948	31.1746	19.6255	30.4598	33.7566
136	CG1299	17.9214	27.735	48.0087	28.4875
137	CG12998	253.817	46.0995	207.685	281.489
138	CG13008	4.80515	9.63189	4.48137	5.63921
139	CG13023	4.99269	1.10597	3.31729	6.06056
140	CG13027	5.3052	11.5722	4.2335	4.17508
141	CG13041	43.6045	14.906	43.9911	35.9794
142	CG13044	25.9929	8.31399	21.0946	22.7174
143	CG13046	12.9202	3.95985	14.2801	22.3049
144	CG13047	23.2568	8.78676	18.9464	20.061
145	CG13060	12.6185	2.80888	10.7888	6.82023
146	CG13063	23.5993	4.811	17.7358	19.437
147	CG13066	8.23057	1.77582	9.65132	7.17296
148	CG13067	100.004	34.9633	100.185	114.392
149	CG13068	54.1036	15.7929	62.1546	57.7279
150	CG13069	84.5068	30.8639	86.3497	89.5184
151	CG13088	9.15911	18.9065	11.0945	10.9114
152	CG13167	3.65699	8.54431	2.36521	3.77609
153	CG13168	17.131	36.6276	16.8991	19.9314
154	CG13183	31.327	14.9958	36.4701	38.0963
155	CG13188	53.6207	24.7011	47.889	47.3818
156	CG13215	3.60491	11.9921	9.5728	3.1418
157	CG13216	81.6108	33.3365	53.7653	74.4772
158	CG1324	14.616	34.1995	16.2819	18.735
159	CG13243,Tektin-A	10.9286	23.8751	13.5053	12.2228
160	CG13245	35.2785	89.2791	40.8525	47.4646
161	CG13282	74.5083	36.3062	66.6915	72.9095
162	CG13321	72.5231	75.2307	112.358	65.7979
163	CG13326	3.79876	8.53817	3.26027	4.0721
164	CG13333	7.47313	8.1034	5.53831	4.09739
165	CG13335	65.7083	195.836	149.486	136.767
166	CG13340	70.916	167.408	73.4328	84.46
167	CG13385	3.45326	7.42644	3.60669	3.32944
168	CG1340	9.60328	22.2556	9.84298	11.8846
169	CG13405	7.5044	19.7993	6.69476	9.99094
170	CG13422	2.94037	71.3942	44.0827	31.6917
171	CG13430,Cpr57A	36.7207	10.0097	21.2979	27.7281
172	CG13442	8.70473	18.5309	8.4436	10.3427
173	CG13481	10.6098	25.9978	8.33802	13.9507
174	CG13501	3.36022	8.69721	3.30544	4.24242
175	CG13544	8.00864	18.207	9.09419	9.9127
176	CG13577	3.73612	8.06389	3.05034	4.70755
177	CG13597	7.98834	15.9652	8.92444	9.19012
178	CG13611	3.20486	7.4185	2.38723	3.26384
179	CG13618	26.8154	2.27366	11.0167	25.1371
180	CG13641	161.276	41.2747	126.37	171.356
181	CG13674	36.1468	10.5017	40.7244	35.4969
182	CG13676	85.2486	41.9012	76.9089	79.7651
183	CG13678	66.3694	17.8565	59.0831	62.6374
184	CG13679	54.8078	14.8071	51.4422	46.1418
185	CG1368	74.3194	25.0124	84.9547	74.4548
186	CG13700	8.89572	21.9292	9.92906	10.8342
187	CG13722	49.7828	8.1371	27.8572	41.2246
188	CG13725	8.34777	20.6569	8.67607	8.00131
189	CG13731	18.2257	3.80721	17.5681	14.278
190	CG13733	7.93328	16.9062	8.03685	9.29667
191	CG13743,CG8197	4.25503	10.5058	3.11045	4.05787
192	CG13833	12.5583	1.35765	6.09991	10.3629
193	CG13872	3.89249	10.0007	4.10256	4.27819
194	CG13889	1.86989	4.11742	2.05275	2.00179
195	CG13898	37.0905	69.4114	32.0441	38.7851
196	CG13905	22.479	69.0502	64.9321	51.8163
197	CG1394	37.7226	90.0827	37.6849	48.6269
198	CG13978	10.9503	26.076	11.6086	13.8771
199	CG13991	3.81423	8.27814	3.79177	4.14976
200	CG14011	5.8913	10.775	4.98664	5.03046
201	CG14062	109.409	43.439	107.808	90.9575
202	CG14118	172.334	92.2671	175.238	171.611
203	CG14128	12.7676	25.9433	12.1664	15.4258
204	CG14247	0.383799	8.47659	1.13521	1.06157
205	CG14282	4.80678	13.4756	6.93137	6.74903
206	CG14297	16.3811	32.9322	14.7947	21.1724
207	CG14305	17.0861	40.223	16.4659	20.3705
208	CG14316	7.95295	17.4147	7.7194	9.11274
209	CG14354	5.13163	13.1498	6.33571	6.39363
210	CG14355	9.9746	20.6946	10.4224	11.4118
211	CG14375	138.527	54.1369	82.6622	129.624
212	CG14397	52.7498	27.5099	37.9969	49.9552
213	CG14508	5.75105	15.1416	6.61887	6.13792
214	CG14515	0.78116	6.62702	3.5344	2.96996
215	CG14540	20.1158	43.936	18.5096	25.0191
216	CG14546	3.04702	8.06929	3.44462	3.59551
217	CG14564	89.9301	32.6913	91.4422	95.69
218	CG14565	27.4297	6.46762	16.5639	38.478
219	CG14566	28.2578	14.1248	25.7437	34.8636
220	CG14568	29.6609	14.3581	28.464	33.3113
221	CG14569	37.2733	17.0328	33.7936	44.7526
222	CG14572	18.1254	5.10184	18.3165	20.2431
223	CG14573	36.1904	16.673	38.6141	37.3318
224	CG14579	9.38614	22.7459	8.50767	13.1095
225	CG14598	17.0746	1.93216	9.53355	16.2534
226	CG14605	5.27995	14.1807	4.73568	5.93167
227	CG14658	19.1088	41.0076	18.0379	16.6468
228	CG14688	123.055	59.5066	90.5891	104.211
229	CG14717	2.8682	8.72796	3.89213	3.79522
230	CG14718	19.3654	42.9434	18.0356	23.1397
231	CG14739	8.72984	20.9152	9.32351	9.6162
232	CG14740	10.8715	27.0018	10.9494	11.964
233	CG14752	309.524	132.195	224.107	298.859
234	CG14787	27.182	5.00538	17.4502	16.8054
235	CG14830	21.8929	11.8621	17.4745	20.0661
236	CG14840	6.27439	12.8653	5.30189	6.27487
237	CG14926	35.3536	87.946	35.9556	42.781
238	CG14946	77.3338	46.6956	64.2118	81.1367
239	CG14957	4.02087	15.573	5.36359	1.85444
240	CG14995	46.4336	84.4969	50.3607	50.9506
241	CG15035	4.53107	9.86577	3.40234	5.26766
242	CG15040	1.33276	2.08998	0.966407	1.04455
243	CG15043	2.40579	7.05284	2.30844	1.05466
244	CG15065	5.37338	463.209	238.59	235.101
245	CG15086	5.38684	11.7269	5.07556	5.75533
246	CG15109	53.4568	121.636	54.6045	65.4358
247	CG15177	16.9131	38.9939	18.5258	23.4633
248	CG15199	40.2063	8.07224	23.3326	30.4779
249	CG15200	20.2274	52.6278	17.8963	27.2744
250	CG15202	74.4581	16.9213	67.8909	43.9852
251	CG15208	11.4634	26.3956	12.319	13.1763
252	CG15212	1695.23	458.482	1161.94	1511.83
253	CG15213	468.854	65.5672	341.308	485.046
254	CG15219	82.2669	192.136	70.0992	103.503
255	CG15251	121.072	51.4867	89.0939	111.443
256	CG15256	12.8148	33.2145	12.6893	15.6093
257	CG15279	9.02471	5.38581	13.09	10.608
258	CG15286	11.2458	26.1308	12.5434	11.8155
259	CG15306	16.8098	41.3589	18.8255	21.2093
260	CG15369	425.941	160.758	345.194	308.029
261	CG15395	1.08843	6.02903	2.17886	1.52159
262	CG15425	13.0011	31.5523	14.6523	18.0737
263	CG15523	6.80065	11.793	7.45773	6.80523
264	CG15572	4.62251	9.598	4.39394	5.3058
265	CG15576	5.44258	14.4881	4.03137	8.3403
266	CG15580	4.77667	9.30987	4.1589	5.76654
267	CG15615	131.668	58.4812	89.2659	110.552
268	CG15625	8.84493	9.12562	4.01268	4.32163
269	CG15631	6.15732	14.2653	5.86065	6.88451
270	CG15657	16.3232	30.4161	11.288	14.2074
271	CG15708	7.14247	16.1835	6.9808	6.36845
272	CG15711	5.54666	12.9209	5.16349	4.491
273	CG15785,CG15786	48.5144	12.0188	37.6285	37.3634
274	CG15824	2.43051	5.73878	2.41173	2.99791
275	CG15878	5.04012	11.5297	6.11543	6.13024
276	CG15890	6.19174	3.14684	4.69428	6.01795
277	CG15891	12.4317	30.8849	13.7755	15.8122
278	CG16704	1850.15	805.981	1305.16	1500.33
279	CG16713	248.633	674.205	541.229	460.698
280	CG16739	17.8153	38.1147	19.263	19.1373
281	CG16758	57.5176	146.492	83.7195	72.3337
282	CG16782	17.105	36.5147	16.3847	20.7574
283	CG16820	44.2676	16.8028	36.5024	46.0188
284	CG16836	0.81818	101.688	47.4198	55.3078
285	CG16894	15.0623	29.8974	13.4733	15.4079
286	CG16957	9.23125	24.4572	10.8733	12.2746
287	CG16972	11.9999	21.6426	12.5417	11.9763
288	CG17032	21.3165	9.66235	12.6935	14.9076
289	CG17065	16.3396	5.72596	12.5369	12.6136
290	CG17098	9.32142	19.5249	8.64138	10.1174
291	CG17104	28.7583	13.6093	24.1349	29.3045
292	CG17127	1025.89	507.564	638.487	854.967
293	CG17139,CG17140	7.34049	16.2252	7.74003	6.83011
294	CG17150	1.9683	3.68254	1.3947	1.26081
295	CG17154	9.51895	18.4176	7.44335	8.56664
296	CG17237	12.9843	28.922	12.4572	16.4092
297	CG17244	88.8137	76.2226	94.4244	120.781
298	CG17261	32.8117	67.9637	33.5251	34.2336
299	CG17264	27.4219	8.6579	20.1414	23.1351
300	CG17283,CG5860	11.1889	5.37683	6.49955	9.27132
301	CG17300	10.2002	24.6924	8.64716	12.2385
302	CG17325	83.6739	3.75843	15.8764	63.049
303	CG17344	24.5864	62.7715	27.8026	35.2762
304	CG17349	10.0304	24.048	10.5465	10.6473
305	CG17376	133.168	317.363	140.715	166.488
306	CG17377	61.3537	152.877	65.2447	73.6298
307	CG17386	55.4067	20.5101	54.8339	52.2301
308	CG17387	4.38018	8.89649	4.81956	4.10587
309	CG17470	25.4167	54.4121	28.4234	29.5873
310	CG17564	7.98394	20.2616	7.76334	10.2665
311	CG17567	102.157	251.305	104.947	137.832
312	CG17669	4.25254	10.5309	5.55334	5.40199
313	CG17707	16.0085	5.35909	7.96288	11.9868
314	CG1774	3.64831	8.27297	3.6625	4.39109
315	CG17819	7.8367	18.7106	7.03707	8.16316
316	CG17843	4.63069	1.37361	2.53105	3.76042
317	CG17999	0.493903	11.583	1.54296	0.535723
318	CG18067	199.999	543.024	423.582	479.492
319	CG18109	5.61697	12.7465	5.85101	6.04708
320	CG18193	19.879	41.636	16.8351	24.4581
321	CG18266	15.0905	34.8756	15.1744	17
322	CG18369	6.55528	13.2689	6.17698	6.75221
323	CG18418	14.4564	29.7868	12.552	16.7235
324	CG18472	9.28792	18.3893	9.78975	10.4564
325	CG1850	182.168	27.5767	133.516	149.208
326	CG18636	50.9513	30.967	36.1822	51.6401
327	CG18641,CG31948	45.7423	97.6838	45.0627	53.2976
328	CG18662	41.5136	87.713	32.1674	42.5527
329	CG18869	6.75494	14.4422	8.11711	8.14374
330	CG1887	30.9932	12.0432	20.2001	24.484
331	CG1909	203541000	86679300	2613520000	199482000
332	CG1958	7.8892	20.3184	9.24359	11.0959
333	CG1979,Sodh-1	8.57243	18.0603	8.23811	9.07035
334	CG1999	13.6219	30.7582	10.7097	15.9943
335	CG2053	6.63848	14.996	4.6147	8.85727
336	CG2070	13.2889	0.73299	0.795333	2.46734
337	CG2113	10.8369	26.8328	10.2	14.6725
338	CG2145	25.849	9.88679	21.7746	22.4837
339	CG2150	579.187	328.201	444.681	556.398
340	CG2233	106.76	59.0832	267.427	504.444
341	CG2254	8.28062	2.51993	4.40832	5.69431
342	CG2267	15.6599	34.6838	15.5865	20.0386
343	CG2528	5.48806	14.2056	5.8003	7.78865
344	CG2574	4.37888	11.8484	3.91919	6.42335
345	CG2652	4.37267	8.59257	2.11036	5.40547
346	CG2750	5.09616	10.5583	5.06704	5.50634
347	CG2781	27.8043	11.115	20.612	23.4667
348	CG2871	10.1316	21.6992	10.7904	12.574
349	CG2955	30.7155	72.0654	29.1983	38.25
350	CG2964	4.89343	11.1566	3.87457	5.97206
351	CG30026	57.5146	100.341	86.4935	107.25
352	CG30039	32.7712	75.7446	32.4634	36.9756
353	CG30083	11.2683	3.94723	12.0192	8.99343
354	CG30108,CG30109	99.4236	293.51	202.044	197.668
355	CG30152	54.8	44.3881	57.134	71.9494
356	CG30161	5.16557	9.41531	4.70996	3.50312
357	CG30177	6.31555	12.6585	4.4698	6.84776
358	CG30268,CG30275	2.78359	5.75749	2.18446	2.91198
359	CG30271	8.28192	17.326	8.78002	8.01919
360	CG30359	131.495	80.066	113.156	128.017
361	CG30376	20.9974	47.4299	20.093	28.1074
362	CG30377	12.1291	5.41471	9.81842	9.40389
363	CG30430	48.292	100.599	40.0827	52.7712
364	CG30456	22.3197	13.7827	16.643	23.1394
365	CG3085	14.1919	33.6799	15.058	16.4365
366	CG3092	5.80722	14.539	6.16224	6.82032
367	CG31010	5.08846	13.0288	4.57528	6.39012
368	CG31013	4.0291	8.71197	4.01604	4.60642
369	CG31025	16.2182	38.2637	17.3907	19.1332
370	CG31029	17.225	37.1037	18.7799	18.3209
371	CG31075	354.733	161.821	228.034	271.319
372	CG31159,CG31161	4.76965	12.9786	5.0528	6.11906
373	CG31169	9.5376	19.371	9.7544	11.071
374	CG31178,CG31431	28.5328	55.111	24.0864	35.4845
375	CG31206	16.381	34.9525	14.5866	20.0231
376	CG3121	5.94764	11.4525	4.44387	7.25333
377	CG31226	168.637	358.93	156.027	205.585
378	CG3124	48.8684	118.198	50.5324	54.1951
379	CG31259	3.71423	0.363218	1.87956	2.05484
380	CG31294	18.9165	34.3752	16.0075	21.165
381	CG31313	62.8423	13.9095	25.191	40.2634
382	CG31327	4.86749	12.0189	4.54818	6.34217
383	CG31391	9.89913	21.9826	8.89793	10.3893
384	CG31445	3.25143	8.64314	3.74349	3.71727
385	CG31459	8.44764	18.0246	5.63595	8.77554
386	CG31468	82.6919	172.979	77.858	90.7613
387	CG31482	13.5808	27.9497	10.2375	16.6818
388	CG31522	56.202	18.7523	34.9728	46.8015
389	CG31528	9.6907	23.7946	10.3538	14.2848
390	CG31533	4.52387	10.3115	5.4937	5.417
391	CG31547	24.5183	10.7575	18.7098	19.5205
392	CG31639	45.0908	104.304	42.1514	51.939
393	CG31709,gcm	49.9256	107.933	49.8084	62.3796
394	CG31728,CG31851	7.92885	14.8893	12.8052	5.92941
395	CG31735	8.7578	20.8146	7.92563	11.6239
396	CG31740,CG42634	82.3954	176.116	68.5598	92.7898
397	CG31742	7.86794	14.3767	5.09673	6.05154
398	CG31773	5.48042	11.1603	5.79723	5.78473
399	CG31775	507.254	296.323	243.895	492.832
400	CG31784	5.06891	11.0069	4.67809	5.70697
401	CG31787	8.26072	23.1205	7.86985	9.21688
402	CG31788	76.8743	188.062	89.5654	98.6806
403	CG31793	4.6941	9.22604	5.95236	4.60915
404	CG31802	26.7393	52.3307	24.7407	27.1467
405	CG31817	1.89926	3.94173	1.83924	2.3134
406	CG31819	6.97292	15.1046	5.73622	9.12363
407	CG31820	68.8837	186.413	63.881	98.9455
408	CG31882	7.96485	15.4295	6.20755	7.30973
409	CG31910	8.44593	20.2954	8.03348	10.4303
410	CG31988	60.0842	140.344	62.9401	72.7734
411	CG31997	364.043	189.876	202.353	335.63
412	CG32023	2.37229	16.0043	12.2769	8.12848
413	CG32063	54.4474	134.118	56.3553	64.9235
414	CG32064	61.7114	150.431	62.5538	70.1848
415	CG32068	104.458	54.7948	76.5008	102.776
416	CG32081	17.2226	44.7616	16.4638	22.0349
417	CG32091	45.712	14.8732	38.9941	37.0988
418	CG3213	29.5655	60.7688	31.5302	31.5827
419	CG3215	5.84287	13.842	6.14321	5.9426
420	CG32165	9.84109	19.0925	9.87607	9.96252
421	CG32186	1.92158	3.99668	1.71109	2.1681
422	CG3222	12.6465	30.3266	14.1846	15.7394
423	CG32232	1.94656	5.11563	1.90992	2.65072
424	CG32240	16.7332	40.9826	15.0958	18.5381
425	CG32262	9.96098	20.8527	9.216	8.90798
426	CG32351	54.7387	125.94	58.4312	68.2096
427	CG32371	29.6628	66.5209	30.1276	35.1018
428	CG32388	24.3015	54.019	24.9673	33.4898
429	CG32392	10.8068	21.7345	9.79373	11.5965
430	CG32428	25.3258	13.3232	23.754	25.0904
431	CG32436	15.0844	32.7142	15.247	16.007
432	CG32437	7.94193	18.2536	7.57794	9.33218
433	CG3244	210.585	71.0407	136.463	191.351
434	CG32445	8.77278	18.6191	9.50261	8.72313
435	CG32457	16.9424	3.03663	12.5985	8.34357
436	CG32459	7.63511	16.4411	7.3424	8.99017
437	CG32631	1013.26	214.316	673.059	829.92
438	CG32652	51.6232	125.101	53.4765	68.8854
439	CG32687	38.1948	26.475	38.8121	42.3941
440	CG32694	40.7623	17.2796	32.6733	36.0962
441	CG32698	40.065	21.2322	31.5693	43.2106
442	CG32719	3.6339	7.99654	3.31619	4.04434
443	CG32819	5.57084	12.0578	7.37348	6.41867
444	CG32820	4.84968	10.2968	5.85061	4.95579
445	CG33017	2.47165	5.39195	2.05815	2.64425
446	CG3306	8.04708	17.175	7.51257	8.24638
447	CG33125	2.53497	5.59147	2.63379	2.54989
448	CG33235	3.89599	8.22066	3.89836	3.94737
449	CG3330	17.1238	37.1392	16.8045	18.5683
450	CG33309	7.01801	13.822	6.17975	8.75003
451	CG33322	7.52224	16.519	7.86885	10.2157
452	CG33340	27.2716	72.6858	25.4099	37.7055
453	CG33462	32.2793	59.1599	69.9118	61.2496
454	CG33470	61.7334	558.826	317.782	298.661
455	CG33489,CG33490	9.54757	20.5321	8.36307	10.4125
456	CG33664	20.1036	47.2136	18.1896	27.8682
457	CG33667	28.8706	67.0466	24.8326	38.9344
458	CG33964,Cyp6g1	18.2667	6.54563	13.9655	20.2487
459	CG33970	39.6157	12.7411	35.8262	35.5676
460	CG33998	683.836	246.201	561.705	535.958
461	CG34027	4.60212	1.40455	2.35383	3.67897
462	CG34053	29.9317	10.554	23.1667	23.776
463	CG34107,CG34108	27.9086	67.1462	25.2341	39.139
464	CG34110	3.72648	9.14259	4.40453	4.98216
465	CG34124	2.06692	3.9879	2.01255	1.9386
466	CG34136	186.014	86.986	122.974	187.671
467	CG34166	930.125	561.978	745.281	1053.02
468	CG34168	150.197	395.693	146.246	187.215
469	CG34312	7.68297	23.3103	8.25556	12.1058
470	CG34313	23.1734	11.7211	21.5961	23.5017
471	CG34331	11.8611	2.87296	10.5318	11.7548
472	CG34337,CG9657	0.151122	0.118448	5.00127	0.0630045
473	CG34396	11.0551	35.7357	24.8483	24.6971
474	CG34425	6.09364	13.0978	5.58591	6.86183
475	CG34434	17.1552	38.9885	15.9948	21.4745
476	CG34455	87.036	60.028	79.0552	96.6201
477	CG34457	7.10981	16.0342	7.24428	8.07915
478	CG3483	5.57633	13.122	6.48538	6.70925
479	CG3502	17.4217	7.87234	12.6474	14.3237
480	CG3517	17.7287	37.5209	16.0292	20.6422
481	CG3557	6.16922	14.452	5.67835	6.91727
482	CG3604	214.701	118.244	151.156	186.927
483	CG3687	11.3051	28.9255	10.1017	16.4201
484	CG3699	98.1768	48.4734	67.1185	84.8213
485	CG3748	2.65138	5.40331	3.60011	2.47263
486	CG3759	5.02336	1.16676	1.6055	1.90551
487	CG3777	216.216	79.8665	161.239	179.034
488	CG3809	6.59595	16.8373	6.85416	7.9996
489	CG3916	50.5769	7.12157	44.6317	48.4206
490	CG3940	98.2144	68.4273	91.7463	106.849
491	CG3964	8.45805	17.4772	8.71587	9.26335
492	CG4021	13.9116	31.2877	12.4161	21.1849
493	CG40439	46.0252	58.1737	58.3177	32.7447
494	CG4151	1957.85	911.12	1852.92	1695.49
495	CG4161	3.77124	10.465	4.25607	6.24197
496	CG4198	7.70977	16.3983	9.05201	9.63636
497	CG4213	10.7968	18.1183	13.7855	9.92308
498	CG42329	12.0579	14.7006	25.2768	9.943
499	CG42331	6.30045	12.4991	9.61192	8.36085
500	CG4250	66.4088	127.268	84.044	78.9925
501	CG42500	1640.13	111.909	1162.43	907.736
502	CG42523	28.714	62.6743	22.2451	30.7588
503	CG42537	340.65	64.749	463.455	438.249
504	CG42586	507.858	296.022	248.825	492.832
505	CG42659	18.2436	53.3946	23.4952	32.9939
506	CG42680	230.289	1582.99	489.048	548.85
507	CG4323	13.7951	33.6622	14.2947	16.3652
508	CG4408	83.3991	40.069	59.6238	63.357
509	CG4439	51.8525	117.822	51.6042	60.8359
510	CG4546	33.2659	74.3466	34.1263	40.5866
511	CG4580	4.36093	0.391942	1.5239	0.766386
512	CG4681	5.67342	13.8382	5.51473	6.15736
513	CG4683	4.52447	9.91819	4.36764	4.42489
514	CG4691	33.9125	85.2502	32.5259	38.6104
515	CG4701	8.82879	19.0106	8.79404	10.8682
516	CG4706	7.96629	18.4787	7.60073	8.27739
517	CG4712	7.43071	16.9226	8.12622	8.78489
518	CG4714	4.96746	10.9673	5.19539	6.2916
519	CG4744	6.09165	13.9456	6.2499	6.99552
520	CG4757	10.0005	35.4019	23.6299	28.8033
521	CG4793	8.95976	36.052	15.039	11.0242
522	CG4810	5.39692	14.112	5.58099	7.19856
523	CG4836	33.8911	72.5738	34.9676	33.8647
524	CG4892	3.90279	8.08653	3.17058	3.23016
525	CG4907,wge	8.54505	20.475	9.48375	10.4951
526	CG4983	13.2085	28.1792	13.5028	14.6287
527	CG4988	9.31654	17.1039	8.13995	9.36697
528	CG4995	10.6312	24.3443	10.7465	12.3011
529	CG4998	237.752	134.698	201.572	218.458
530	CG5017	34.4109	75.9075	37.6768	41.7352
531	CG5024	12.7957	32.5161	11.8516	14.8964
532	CG5075	7.22912	17.4936	7.35742	8.40733
533	CG5080	244.886	132.387	202.438	225.078
534	CG5089	48.2846	108.678	49.9671	59.3879
535	CG5103	4.45885	10.7281	4.71062	4.85253
536	CG5111	5.30073	11.4503	5.45981	5.93277
537	CG5122	3.09508	7.3084	2.62264	3.13651
538	CG5144	9.04115	20.178	8.56302	11.0806
539	CG5213	7.86816	15.6255	7.51691	7.78604
540	CG5217	18.9383	41.1216	18.5725	21.2311
541	CG5254	57.2598	33.8484	48.8449	55.2392
542	CG5287,CG5458	11.3995	22.017	16.8406	10.826
543	CG5302	7.25266	23.6004	16.5479	13.6117
544	CG5326	36.7478	11.9798	27.6667	32.9946
545	CG5389	4.63741	9.83781	3.90515	5.80584
546	CG5390	214.166	110.781	173.299	194.391
547	CG5397	18.551	8.76642	13.8561	14.5053
548	CG5428	45.7811	23.4458	29.6655	39.859
549	CG5432	7.27874	16.4655	6.72679	7.34978
550	CG5539	12.415	32.0391	12.049	17.9729
551	CG5614	23.9875	55.163	24.9141	28.289
552	CG5618	84.6047	47.1821	69.6254	81.8094
553	CG5681	6.7588	12.8902	4.58813	8.53248
554	CG5718	4.53006	10.3462	3.86418	4.77193
555	CG5755	9.40653	20.37	8.81518	9.46915
556	CG5762	28.2613	58.5008	24.2881	31.2548
557	CG5790	10.1072	23.4434	10.8618	12.5399
558	CG5847	12.8559	2.8577	14.8921	13.2247
559	CG5849	13.2743	7.67082	11.284	13.5773
560	CG5909	3.61703	13.2224	21.135	10.889
561	CG5928	30.5285	11.8385	23.0528	28.1488
562	CG5953	9.33658	18.6635	12.2704	11.1729
563	CG5966	18.3655	26.4621	38.0208	23.6443
564	CG5973	77.6017	22.9989	60.544	80.7151
565	CG5987	11.022	23.4992	11.5698	12.1943
566	CG6083	5.86277	13.8037	6.21542	6.58176
567	CG6125	11.2191	3.60552	12.2996	8.16886
568	CG6140	7.90997	19.2982	8.93207	8.6165
569	CG6142	19.4051	4.15121	17.6589	18.6208
570	CG6262	10.9438	25.0254	12.2736	12.3797
571	CG6304	18.5705	43.1728	17.7127	20.7577
572	CG6330	47.1921	113.282	56.235	66.563
573	CG6332	11.4183	23.205	12.2924	13.1976
574	CG6361	57.2467	29.864	55.723	51.3663
575	CG6372	101.318	231.819	98.9893	114.307
576	CG6380	12.9413	31.222	15.0767	14.7884
577	CG6385	26.6028	8.74885	16.8569	19.999
578	CG6409	382.149	130.03	245.97	308.017
579	CG6426	151.314	21.4242	97.1103	137.13
580	CG6429,CG6435	37.6241	1.89852	48.2088	40.4994
581	CG6472	4.58752	0.894125	2.96416	4.03771
582	CG6485	7.65042	17.4079	8.52378	7.76978
583	CG6497	3.9257	9.15609	3.32633	4.18869
584	CG6569	11.6844	24.1119	11.9628	12.9933
585	CG6602	22.5	4.89558	10.9364	17.3937
586	CG6614	2.8549	6.95868	3.21171	3.96191
587	CG6629	9.8561	23.2416	9.54703	11.2019
588	CG6652	14.4875	28.5253	12.8557	14.8851
589	CG6687	39.466	107.472	52.7151	60.0511
590	CG6752	7.55564	13.8551	7.75014	7.88056
591	CG6761	4.87072	9.93563	5.28537	4.92624
592	CG6770	1305.48	698.891	1044.81	1327.34
593	CG6782,CG6783	559.009	345.456	464.804	565.147
594	CG6788	16.7636	2.68274	6.60816	7.85358
595	CG6790	11.6198	27.5864	10.8402	13.7283
596	CG6836	27.1344	14.1872	19.8023	25.0061
597	CG6865	11.8114	0.960435	7.49049	9.5643
598	CG6870	12.4781	5.80079	10.1396	15.9922
599	CG6888	15.4941	30.4437	11.1819	15.8507
600	CG6893	4.88903	12.2601	2.94484	7.00179
601	CG6904	33.063	11.9031	26.2593	24.6916
602	CG6910	5.45888	2.16774	4.85953	6.70105
603	CG7024	4.92706	10.5046	5.15047	5.55942
604	CG7045	42.8133	94.6618	36.1516	49.1569
605	CG7046	51.6192	111.485	52.6853	59.5442
606	CG7094	8.11969	16.136	7.22898	8.92451
607	CG7140	3.90296	8.45847	4.74416	3.56892
608	CG7191	7.2228	45.8893	17.9218	8.72402
609	CG7196	9.51017	21.5004	9.75772	10.9591
610	CG7202	11.2335	29.3986	10.2479	16.2579
611	CG7229	7.60411	16.4045	6.80845	9.01434
612	CG7251	9.66923	26.0377	11.9251	12.8288
613	CG7300	1.80097	0.173266	1.06075	0.546066
614	CG7309	10.8074	27.4739	10.7838	13.0367
615	CG7311	6.65634	13.1904	7.78836	6.92175
616	CG7349	7.61255	15.5732	7.45667	8.05271
617	CG7366	6.50908	14.1231	5.53716	6.58207
618	CG7402	7.97254	1.10988	5.84507	7.51069
619	CG7432	41.3499	22.4725	33.7081	37.1481
620	CG7441	17.0073	34.2438	16.8363	20.1015
621	CG7461	39.5169	22.4468	40.7801	39.7539
622	CG7470	64.9359	39.8346	52.3569	61.6606
623	CG7510	7.37842	17.0726	10.2198	9.37807
624	CG7589	9.56341	2.90082	8.45621	7.663
625	CG7616	4.90763	9.79455	4.40587	5.71472
626	CG7634	6.81121	15.1888	5.31157	7.29371
627	CG7669	5.23242	11.3665	5.81306	5.53872
628	CG7707	6.66244	19.5109	8.32805	9.84559
629	CG7716	6.87833	15.852	6.3571	8.70813
630	CG7724	27.1351	9.22229	17.1893	17.5843
631	CG7742	9.49812	22.0345	16.721	11.5853
632	CG7755	6.17371	14.9568	6.49474	6.97225
633	CG7778	38.6403	124.262	59.6707	61.7423
634	CG7804	14.6232	30.2356	14.712	18.2247
635	CG7813	16.1865	37.9132	16.5317	20.2743
636	CG7856	3.61844	8.63122	4.02969	3.97928
637	CG7907	6.49024	11.6527	5.75911	6.32881
638	CG7924	737.434	1095.45	718.782	531.195
639	CG8065	12.2747	24.3123	10.7055	11.4649
640	CG8138	3.97305	11.0766	5.4191	5.46312
641	CG8147	0.920719	3.52473	1.00039	1.11253
642	CG8157	11.4912	1.61344	8.05149	7.03467
643	CG8193	1.22514	4.91626	2.66298	1.52934
644	CG8236	3.62554	8.42777	3.20857	4.09932
645	CG8257	10.8468	18.4677	9.8626	10.1891
646	CG8316	3.31995	7.43412	3.66582	3.95762
647	CG8317	126.441	60.9435	98.0707	171.276
648	CG8368	17.5219	33.5372	18.0458	20.8125
649	CG8369	308.648	112.579	155.257	189.319
650	CG8476	9.52601	21.8846	9.49573	10.7457
651	CG8508	5.95181	13.819	8.04982	6.85157
652	CG8539	97.756	19.7541	60.7076	67.6848
653	CG8547	29.9216	16.3791	30.3024	27.8364
654	CG8560	7.77827	16.3638	8.76971	7.786
655	CG8564	20.5459	45.0957	20.0068	21.1915
656	CG8565	17.8834	37.3599	16.962	20.9994
657	CG8630	7.18476	2.8464	7.58812	6.62186
658	CG8646	10.5677	3.43746	8.54088	8.07351
659	CG8654	10.4331	18.3137	7.41088	10.0313
660	CG8665	8.43512	1.27603	3.12245	5.18059
661	CG8736	64.502	9.51278	38.831	51.9339
662	CG8745	14.7594	33.8618	11.9233	13.8494
663	CG8746	8.72639	19.6195	7.6622	10.2432
664	CG8785	69.9844	35.9756	56.5298	59.5691
665	CG8834	8.3035	1.47685	3.68003	5.13412
666	CG8851	6.26507	13.4146	6.39009	7.5204
667	CG8888	73.489	32.2523	52.8931	55.6821
668	CG8927	183.274	106.905	157.947	184.062
669	CG9010	13.2301	31.8482	11.1095	14.4118
670	CG9014	11.6869	25.5474	13.0057	12.9011
671	CG9016	59.0927	121.626	59.8277	75.3234
672	CG9027	126.375	62.2975	111.519	130.813
673	CG9080	0.325801	3.0749	16.0714	1.92833
674	CG9119	9.84484	2.54608	6.85549	8.61554
675	CG9129	22.1392	51.3945	23.8665	28.8828
676	CG9130,CG9133	39.2846	87.8101	42.8516	43.1827
677	CG9134	98.577	28.0531	68.2329	80.4584
678	CG9222	7.14336	17.9448	5.9839	8.13969
679	CG9238	47.0021	18.9065	35.5239	40.0838
680	CG9284	84.2095	176.013	69.9447	117.369
681	CG9313	6.75022	14.1467	6.2385	7.73074
682	CG9314	19.1341	45.5399	20.9822	23.7981
683	CG9331	60.2035	13.3848	29.4996	32.9195
684	CG9392	3.93159	8.28234	4.30657	4.4249
685	CG9416	40.2783	20.9313	31.399	33.5447
686	CG9427	71.4959	34.5576	58.0297	62.235
687	CG9444	38.9594	13.2427	26.888	30.3942
688	CG9458	4.29992	1.3025	3.76464	5.28644
689	CG9483	5.55654	14.5284	4.97451	7.8969
690	CG9570	8.11957	20.3771	9.3643	11.2118
691	CG9624	7.34524	17.9502	7.40411	9.65877
692	CG9632	7.4152	15.7029	8.81311	7.64054
693	CG9701	26.8319	24.4726	54.6304	45.1981
694	CG9722	6.71215	17.112	8.37087	6.3654
695	CG9747	73.4618	44.0818	64.2215	73.573
696	CG9782	41.4346	18.0173	35.0045	36.2071
697	CG9861	9.63971	21.5453	9.36741	11.2283
698	CG9914	95.5742	20.3295	41.6652	60.0215
699	CG9920	97.915	217.39	93.4049	116.085
700	CG9975	21.4372	45.0314	22.713	26.1554
701	CG9990,htt	96.6463	43.2669	80.9869	86.0402
702	Chit	71.7145	38.8705	55.4559	78.2572
703	Cht12	11.4506	22.9134	11.6476	12.5454
704	Cht7	53.2752	27.2805	39.6516	44.1495
705	Cht9	6.32072	2.44335	1.52259	1.16028
706	comm2	44.7297	22.507	39.727	38.2309
707	Cpr100A	107.372	19.2442	76.6354	98.9134
708	Cpr12A	86.3424	34.2314	66.0997	73.5627
709	Cpr31A	23.738	4.141	20.69	18.5332
710	Cpr47Ea	4.40494	2.19603	6.66513	7.11188
711	Cpr47Eb	14.3647	11.8204	49.5813	28.5733
712	Cpr47Ec	192.048	70.2004	158.697	194.051
713	Cpr51A	2860.92	728.009	1744.17	2396.59
714	Cpr65Av	12.5099	1.51774	6.66821	11.6306
715	Cpr65Ax1	194.986	21.4597	122.531	191.982
716	Cpr65Ax2	194.986	21.4597	122.531	191.982
717	Cpr65Ea	57.1636	32.2186	58.1785	64.3126
718	Cpr65Ec	837.645	319.132	707.775	820.922
719	Cpr72Ea	24.4117	1.28582	17.3019	31.9617
720	Cpr72Eb	604.469	185.169	503.57	642.454
721	Cpr78Cc	51.8134	3.6785	20.3968	25.3319
722	Cpr78E	953.139	231.878	631.24	644.501
723	Cpr97Ea	23.3957	5.68348	15.3687	21.8168
724	Cpr97Eb	56.4822	11.9146	43.2788	57.2026
725	CR30068,Ih	13.4179	5.75584	11.2672	12.9014
726	CR32657	65.2193	142.125	64.8878	87.7727
727	CR32658	46.7508	105.754	47.5127	60.8634
728	CR32661	22.4334	54.6335	25.2359	29.8819
729	CR33318	9.63961	24.2539	11.5224	9.90251
730	CR33319	11.4111	33.0947	10.8701	13.854
731	Cralbp	49.9933	19.292	33.2272	37.3283
732	Crtp	5.20253	12.1143	5.19446	6.77237
733	CSN1a	3.32069	9.13464	3.13046	3.68677
734	cv-2	8.01776	22.9906	17.0845	13.2556
735	Cyp18a1	36.4305	16.6961	25.8523	26.8675
736	Cyp28d1	5.67183	4.29302	14.4227	5.80095
737	Cyp303a1	48.8013	31.4198	38.2603	57.6129
738	Cyp4c3	0.20924	1.52218	0.3303	0.219672
739	Cyp4d1	21.6776	8.78882	12.1926	18.3173
740	Cyp4d8	12.6129	2.67734	12.5803	9.86242
741	Cyp4e2	39.1893	23.4875	33.8844	44.2772
742	Cyp4p1,Cyp4p2	38.079	5.70309	5.01858	3.01084
743	Cyp6a13	1.88551	1.90067	2.11563	10.4618
744	Cyp6a17,Cyp6a22,Cyp6a23	28.308	8.22033	38.0731	10.2154
745	Cyp6a20	5.55632	16.6603	16.915	10.1709
746	Cyp6a8	0.947361	20.9575	1.36882	2.61704
747	Cyp9c1	33.9263	19.3967	26.6196	35.2865
748	Dat	45.7824	74.9197	45.3302	47.0534
749	Dhc36C	2.29673	5.00265	2.15608	2.36565
750	Dhc98D	2.29696	4.87649	2.08174	2.29709
751	dia	29.0246	14.3174	25.8174	23.789
752	dj	44.8173	94.6945	45.1852	56.9215
753	djl	15.781	36.7108	15.9278	19.039
754	dpr17	10.2064	22.1317	11.5212	12.8915
755	dpr9	6.5387	3.11822	7.07185	6.49498
756	Dpt	287.887	618.575	1271.46	244.131
757	DptB	147.387	359.287	670.175	177.555
758	Dpy-30L2	48.2672	109.911	47.8952	54.4903
759	Dro	72.6801	332.817	551.344	164.687
760	dro2	668.164	1298.19	790.394	769.232
761	dtr	5.31378	10.811	5.42914	5.8784
762	e	24.1732	34.7347	25.4473	18.6509
763	ea	12.0253	6.04599	12.6497	11.5609
764	Edg78E	1871.2	469.95	1454.8	1827.54
765	Edg84A	613.487	177	548.988	519.759
766	Edg91	181.636	52.6792	174.134	203.946
767	Eh	5.73419	0.965313	0.739738	1.16275
768	eIF4E-3	34.2113	72.0966	29.846	42.3891
769	eIF4E-4	22.4225	45.236	22.9842	27.8955
770	eIF4E-5	21.3549	47.9708	21.1947	26.3393
771	eIF4E-7	5.36784	11.938	6.67666	6.5382
772	Eig71Ea	1269.15	548.684	987.34	1092.59
773	Eig71Eb	947.943	389.519	714.094	719.574
774	Eig71Ec	832	403.553	659.422	658.094
775	Eig71Ed	1383.73	614.027	1026.39	1064.08
776	Eig71Ef	797.687	295.511	639.941	569.873
777	Eig71Eg	676.44	221.944	581.441	553.938
778	Eig71Eh	219.311	124.684	245.038	190.849
779	Eig71Ei	202.471	103.604	227.444	206.097
780	Eig71Ej	402.439	29.143	329.098	338.19
781	Eig71Ek	214.803	14.7626	193.005	195.988
782	Esp	7.64091	9.22836	12.7524	5.15248
783	exu	53.6376	113.779	55.453	61.8811
784	fan	24.6685	54.4644	28.0242	26.3047
785	Fatp	33.1427	16.329	28.6626	30.278
786	fj	17.3054	10.242	18.8916	18.8755
787	fon	1081.06	225.278	779.472	963.865
788	frtz	39.7527	41.5725	27.3602	93.9119
789	Fs	16.324	41.0946	15.8848	18.9331
790	Fst	29.1917	182.033	128.39	77.7553
791	ftz-f1	95.0224	37.6568	72.1248	77.6339
792	fu12	17.1397	30.9936	16.4181	16.2496
793	Gadd45	24.9844	45.2619	50.6149	39.1026
794	Gasp	732.47	279.22	558.836	636.024
795	Gld2	10.3373	21.8113	10.6715	11.1513
796	glob2	8.22819	22.2792	9.6319	10.0146
797	grass	14.6703	8.37825	16.2457	17.3163
798	gskt	10.8916	25.2061	10.603	14.1277
799	GstE1	22.5347	36.379	30.4242	21.0192
800	Gyc-89Da	6.3879	3.24513	6.80363	6.48113
801	Hex-t2	7.88101	17.6799	8.13279	9.842
802	His-Psi:CR31614	42.9489	13.5381	10.3272	22.0668
803	His-Psi:CR33802	35.1449	29.2528	29.4884	63.3859
804	His-Psi:CR33811	29.4343	23.3807	25.0872	53.925
805	His1:CG31617	43.5407	31.0073	25.4064	46.2989
806	HmgZ	134.805	82.587	97.5518	140.784
807	Hn	100.356	68.4471	95.6515	110.058
808	hoe1	20.4353	6.33339	12.2183	17.2306
809	hoe2	4.95582	1.2309	2.76897	3.08263
810	Hr38	1.19023	0.256059	0.720734	0.743223
811	Hsc70-2	13.4303	29.7274	13.9634	14.3092
812	Hsp23	4684.22	2288.69	3784.24	3819.14
813	Hsp60B	17.3486	40.7572	16.8517	20.6766
814	Hsp60C	31.9157	73.7681	35.0009	37.4921
815	Hsp60D	6.8918	13.9355	5.24686	6.38378
816	Hsp68	55.5043	44.1422	83.7414	40.6773
817	Hsp70Aa	38.1482	11.8121	142.77	9.34439
818	Hsp70Ab	45.6906	14.0285	172.559	11.1486
819	Hsp70Ba	13.6501	5.72761	43.423	5.28879
820	Hsp70Bb	22.1925	8.44855	70.0505	9.09616
821	Hsp70Bbb	15.6083	6.05227	49.2468	6.00632
822	Hsp70Bc	16.8494	6.79589	54.5115	6.51437
823	Hsp83	464.495	498.992	785.993	411.644
824	hydra	23.0616	43.5149	20.1136	26.7389
825	I-t	8.64708	19.7757	7.9923	9.38305
826	Idgf4	190.406	92.7867	160.845	172.626
827	Ilp6	63.5275	33.0011	56.1507	66.6751
828	IM1,IM2	13.7186	905.811	394.699	521.356
829	IM10	61.607	558.232	317.547	298.602
830	IM14	12.3745	1648.96	584.377	726.645
831	IM23	0	37.6314	27.0696	27.6496
832	IM3	10.6747	1101.61	394.78	571.074
833	IM4	5.54309	274.379	100.7	151.276
834	ImpL3	48.5162	168.733	182.487	81.8046
835	InR	9.85131	17.9748	13.1872	10.7339
836	Irk2	11.5799	3.94623	7.36775	9.76554
837	Jhe	230.459	19.3938	137.522	157.781
838	Jheh2	45.9289	22.3664	35.9844	43.0629
839	Jon65Ai	29.6192	23.2172	8.74929	16.7948
840	Jon65Aii	3.33248	13.0226	2.1016	5.09591
841	Jon99Cii	14.3138	8.4229	2.94562	4.28205
842	Jon99Ciii	15.3303	9.68471	3.75374	5.64728
843	Klp59C	7.8221	18.093	8.15449	9.71832
844	Klp59D	11.6286	25.2722	11.6346	12.6509
845	l(2)01289	10.4931	1.7832	6.18702	6.82227
846	l(2)01810	167.189	81.686	116.769	161.7
847	l(2)05510	57.3785	30.3025	43.1908	44.6344
848	l(2)34Fc	218.834	49.6296	124.473	156.762
849	lat	7.76685	15.931	8.00558	9.22495
850	Lcp4	117.82	9.81408	26.6355	48.2316
851	Lcp65Ac	11.1359	4.31492	8.6364	13.5319
852	Lcp65Ad	4730.13	1138.96	3617.28	4117.98
853	Lcp65Ag1	118.563	37.9121	101.744	96.9653
854	Lcp65Ag2	919.324	280.065	802.223	882.083
855	Lcp65Ag3	66.8802	19.4049	55.5353	62.2903
856	lectin-24Db	23.0204	12.9085	16.1313	24.3446
857	loopin-1	73.2691	180.921	76.3606	90.9298
858	Lsd-1	219.231	124.798	136.914	237.332
859	Lsp1alpha	798.778	310.616	797.675	885.817
860	Lsp1beta	1445.3	865.135	1221.63	1620.23
861	MESK4	55.2952	33.8255	47.2504	54.165
862	mir-282	20.338	11.0638	14.45	18.2443
863	Mmp1	76.7461	194.874	136.845	106.86
864	mmy	216.352	102.13	171.797	202.98
865	mol	15.1784	6.67969	11.0979	16.9244
866	Mp20	183.23	83.7085	133.275	134.342
867	Mst33A	26.3885	61.8071	28.4985	36.5342
868	Mst35Ba	22.2194	51.1265	22.3296	23.8183
869	Mst35Bb	33.7207	86.6353	34.1179	54.0035
870	Mst77F	81.7446	170.61	80.4319	92.6303
871	Mst84Db	90.7191	223.713	83.8037	114.06
872	Mst84Dc	98.3931	234.489	109.408	119.026
873	Mst84Dd	54.7505	141.688	54.4906	67.7517
874	Mst87F	99.3608	247.977	111.18	119.92
875	Mst98Ca	20.4435	58.4101	26.4025	26.9271
876	Mst98Cb	16.1971	37.8659	17.8024	19.4825
877	MstProx	2.34577	7.11007	2.57822	4.28012
878	Mtk	628.431	1724.91	2555.37	984.227
879	NAAT1	1.99729	7.15501	5.6659	2.79189
880	nimB2	13.3278	9.06039	14.2445	17.6949
881	nimC3	37.0642	17.6814	25.04	29.0427
882	nimC4	143.724	70.3321	120.856	161.442
883	Nmdar2	0.654083	0.690574	5.71258	0.598119
884	Nox	16.9873	7.98455	18.6527	14.8582
885	Obp50b,Obp50c	1.3106	4.8148	1.60246	1.42055
886	Obp83g	301.075	93.4836	196.38	244.727
887	obst-A	815.539	315.379	643.874	665.491
888	obst-B	157.504	66.803	111.029	125.908
889	obst-E	111.99	20.8673	74.8856	89.0146
890	ocn	92.5771	200.728	84.5465	112.854
891	Odc1	13.6398	13.9871	10.3317	21.4701
892	orb	9.38933	19.5639	11.6322	10.4078
893	orb2	29.5491	57.8992	29.0937	33.9522
894	Oscillin	257.36	82.1062	162.107	225.1
895	Osi2	185.932	104.161	173.49	194.765
896	path	22.3486	36.9592	47.8145	34.0667
897	Pcd	107.781	52.3133	93.8069	107.643
898	Pcp	452.248	28.9725	170.012	326.995
899	PebIII	149.257	20.7081	76.5113	101.195
900	pgant8	12.8027	6.27251	10.596	11.1503
901	Pgd	50.6798	29.9965	44.6167	47.8193
902	Pglym87	10.94	21.8668	8.75057	9.75326
903	Pgm	31.3154	17.1704	23.7759	28.1992
904	PGRP-SB1	32.221	48.6079	82.917	30.518
905	PGRP-SC1a	1.67602	8.60215	12.3833	1.41163
906	PGRP-SC1b	2.92036	15.4613	29.7024	3.84002
907	PGRP-SC2	26.1123	76.5528	62.8777	31.2395
908	Phk-3	1489.66	893.185	1279.82	1557.79
909	Pkd2	6.93231	13.2919	6.89636	7.94883
910	ple	83.928	307.19	174.25	140.804
911	pncr002:3R	293.542	168.745	252.98	326.882
912	Porin2	21.1667	45.7581	24.537	24.4592
913	PpD5	5.63844	14.0222	7.2242	6.43284
914	PPYR1	5.02354	10.2585	3.85483	4.77848
915	Prat2	18.037	37.6799	32.1416	21.1886
916	proPO-A1	5.03713	18.7718	8.8219	6.80784
917	Pros28.1B	6.21324	15.3116	6.63518	7.59406
918	Prosalpha6T	10.3065	20.9345	9.28855	9.24651
919	Prosbeta5R	7.52861	18.1734	7.20702	8.58322
920	pyd3	27.7205	7.19691	18.1443	22.4117
921	r-cup	2.48692	6.72657	2.19743	3.38048
922	ran-like	10.2348	23.4206	9.7155	12.3332
923	Reg-2	70.6262	39.7205	64.4876	69.3543
924	regucalcin	871.944	326.505	614.806	812.585
925	rha	7.69423	14.2077	6.95403	7.70337
926	roX2	311.444	433.288	211.425	255.04
927	RpL10Aa	12.3682	31.5768	11.5861	14.7546
928	scarface	44.385	99.1557	56.3024	51.0448
929	schuy	5.4415	12.6698	6.89539	6.41107
930	Scp2	20.4814	2.36643	4.82317	11.0905
931	Sdic1	4.80711	10.434	5.85077	5.30886
932	Sdic2	6.34575	11.8749	7.38393	6.58026
933	Sdic3	7.99699	16.2702	10.8623	9.40747
934	serp	423.349	195.665	370.086	379.473
935	SIFR	0.0946349	2.10933	0.0904032	0.126355
936	SIP3	3.45996	8.47094	4.60379	3.66876
937	slif	45.8974	25.003	34.4239	33.4129
938	snky	1.99764	5.25908	1.67118	2.65862
939	snoRNA:Or-aca4	22346.1	26826.5	20239.2	11178.9
940	snoRNA:Psi18S-176	28680.2	32314.2	22856.9	19770.4
941	snoRNA:Psi28S-2622	32117.8	28961	19911.2	16129.8
942	snoRNA:U3:54Aa	10778.4	12609.4	8652.06	7033.57
943	snoRNA:U3:54Ab	10771.9	12607.7	8649.86	7025.85
944	snRNA:U2:34ABa	24188.5	14506.1	12450.1	9978.55
945	snRNA:U5:63BC	26699	13604.9	11372.6	19672.7
946	snRNA:U6:96Ac	1095.95	1873.29	13.4627	40.046
947	Socs36E	17.0087	45.9655	33.8714	27.278
948	soti	27.0115	62.6814	27.0627	33.7034
949	sowi	30.2942	61.5667	25.3867	33.4435
950	Spat	179.625	11.2312	96.8514	105.464
951	Spn43Aa	428.036	208.194	354.722	362.384
952	spz	30.1574	89.953	82.7903	84.1276
953	ssp5	11.389	28.7809	13.4401	13.6968
954	stv	18.6619	12.3668	25.0325	19.423
955	sut4	13.9702	35.4791	14.0376	16.2101
956	t	22.5417	11.0608	16.0017	18.0982
957	Tdc1	6.22573	21.0163	14.1855	12.2582
958	Tektin-C	5.23412	12.2057	7.03575	6.69613
959	TepI	39.3466	63.2524	41.0753	40.5781
960	TepIII	17.6433	7.45203	13.7215	14.6333
961	Tim17b2	15.5813	39.3129	16.5391	18.445
962	tnc	19.7283	46.2751	39.2273	24.3352
963	tomboy20	14.8318	36.4576	16.3917	19.4135
964	TotA	2686.97	6377.43	3543.99	4021.42
965	TotC	6.60743	42.7662	12.0899	8.61062
966	TotZ	75.4623	323.938	124.439	164.205
967	Tpl94D	16.0185	36.7879	15.1923	22.5722
968	TrxT	24.4839	57.2641	30.8217	32.5948
969	Tsf1	117.383	210.624	224.735	229.938
970	Tsp42Ep	134.234	38.9232	91.1196	92.4308
971	Tsp74F	27.856	9.86294	20.0596	23.1724
972	ttm2	8.71648	18.121	7.92016	10.0718
973	ttm3	5.96951	10.9725	4.20939	5.19529
974	TwdlBeta	95.2049	58.796	85.4372	97.9293
975	TwdlC	9.7208	3.89995	8.41843	7.81426
976	TwdlE	703.565	325.621	524.353	629.422
977	TwdlT	365.482	204.037	320.324	336.775
978	Ucp4C	4.69317	13.707	5.02813	6.58483
979	UGP	44.6928	18.9576	33.4421	32.2575
980	UK114	127.089	65.9607	80.7762	102.721
981	Unc-89	2.58033	1.31909	2.8398	2.08223
982	upd2	1.78427	15.3386	12.2489	8.72657
983	upd3	0.561272	7.16396	5.03026	2.81123
984	Vago	30.7696	77.6309	38.0268	52.5751
985	verm	541.029	283.042	427.547	463.429
986	vis	7.23209	14.4579	7.07313	6.77
987	Vmat	7.925	0.828508	4.5345	5.34066
988	w-cup	22.8887	52.6854	23.9352	27.0628
989	wa-cup	5.64779	12.6646	5.45972	6.25829
990	wmd	50.861	28.6377	50.9632	53.6396
991	xmas-1,xmas-2	6.54339	10.9938	5.86718	5.44585
992	yellow-b	6.35011	15.5962	12.6498	16.0859
993	yellow-h	47.0513	20.551	37.4244	43.3995
994	yin	27.5752	9.49481	17.1135	24.4753

## Sheet: common_all_3
Supplemental Table S18: Shared changes in mRNA expression in Smn missense mutant lines.
	gene_id	gene	locus	sample_1	sample_2	status	value_1	value_2	log2(fold_change)	test_stat	p_value	q_value	significant
1	XLOC_002974	Lcp4	2R:4325161-4325908	wild-type	V72G	OK	117.82	9.81408	-3.58559	10.5192	0	0	yes
2	XLOC_003334	IM10	2R:9294510-9297458	wild-type	V72G	OK	61.607	558.232	3.1797	-10.5776	0	0	yes
3	XLOC_003335	CG33470	2R:9299237-9302112	wild-type	V72G	OK	61.7334	558.826	3.17828	-10.4713	0	0	yes
4	XLOC_003705	IM1,IM2	2R:14271456-14274535	wild-type	V72G	OK	13.7186	905.811	6.04501	-10.2274	0	0	yes
5	XLOC_003707	IM3	2R:14275624-14275995	wild-type	V72G	OK	10.6747	1101.61	6.68928	-11.3275	0	0	yes
6	XLOC_005343	IM4	2R:16756340-16756826	wild-type	V72G	OK	5.54309	274.379	5.62933	-9.36762	0	0	yes
7	XLOC_010872	Fst	3R:5463903-5475982	wild-type	V72G	OK	29.1917	182.033	2.64057	-7.78058	7.32747e-15	4.89696e-12	yes
8	XLOC_000860	b	2L:13821202-13823894	wild-type	V72G	OK	21.3641	85.3081	1.9975	-6.97007	3.16769e-12	1.47724e-09	yes
9	XLOC_005099	IM23	2R:14270208-14270737	wild-type	V72G	OK	0	37.6314	1.79769e+308	1.79769e+308	3.15113e-12	1.47724e-09	yes
10	XLOC_003045	Cyp4p1,Cyp4p2	2R:5115285-5134752	wild-type	V72G	OK	38.079	5.70309	-2.73918	6.8814	5.92681e-12	2.65009e-09	yes
11	XLOC_003840	CG13422	2R:16413831-16414331	wild-type	V72G	OK	2.94037	71.3942	4.60174	-6.87885	6.03384e-12	2.67148e-09	yes
12	XLOC_003709	CG15065	2R:14277462-14277752	wild-type	V72G	OK	5.37338	463.209	6.42969	-6.72715	1.73022e-11	7.33943e-09	yes
13	XLOC_002915	CG2070	2R:3549516-3550764	wild-type	V72G	OK	13.2889	0.73299	-4.18029	6.32897	2.46806e-10	8.16997e-08	yes
14	XLOC_004795	CG13335	2R:9458888-9461734	wild-type	V72G	OK	65.7083	195.836	1.5755	-5.72832	1.01431e-08	2.46075e-06	yes
15	XLOC_009274	CG4757	3R:6986923-6988868	wild-type	V72G	OK	10.0005	35.4019	1.82376	-5.37925	7.47956e-08	1.54927e-05	yes
16	XLOC_003842	CG18067	2R:16422014-16422860	wild-type	V72G	OK	199.999	543.024	1.44102	-5.3691	7.9131e-08	1.62955e-05	yes
17	XLOC_011015	Hsp70Aa	3R:7779884-7782514	wild-type	V72G	OK	38.1482	11.8121	-1.69135	5.33697	9.45142e-08	1.90752e-05	yes
18	XLOC_009329	Hsp70Ab	3R:7784274-7788523	wild-type	V72G	OK	45.6906	14.0285	-1.70354	5.1611	2.45504e-07	4.49393e-05	yes
19	XLOC_001584	CG16713	2L:3695027-3695406	wild-type	V72G	OK	248.633	674.205	1.43917	-5.00512	5.58278e-07	9.07073e-05	yes
20	XLOC_011916	spz	3R:22890712-22895982	wild-type	V72G	OK	30.1574	89.953	1.57666	-4.84117	1.29079e-06	0.000192504	yes
21	XLOC_003708	CG16836	2R:14276599-14276963	wild-type	V72G	OK	0.81818	101.688	6.95752	-4.81042	1.50614e-06	0.000218512	yes
22	XLOC_000572	CG3759	2L:9416592-9426344	wild-type	V72G	OK	5.02336	1.16676	-2.10615	4.6967	2.64394e-06	0.000345566	yes
23	XLOC_005955	CG13905	3L:902897-903614	wild-type	V72G	OK	22.479	69.0502	1.61907	-4.59464	4.33492e-06	0.000523145	yes
24	XLOC_012332	intergenic	3R:25350708-25354289	wild-type	V72G	OK	1.62056	0.171859	-3.23719	4.44146	8.93501e-06	0.000916	yes
25	XLOC_009375	Hsp70Bb	3R:8331514-8334105	wild-type	V72G	OK	22.1925	8.44855	-1.39329	4.42582	9.60787e-06	0.000970396	yes
26	XLOC_003863	IM14	2R:16757929-16758134	wild-type	V72G	OK	12.3745	1648.96	7.05804	-4.39236	1.12129e-05	0.00111249	yes
27	XLOC_014619	upd2	X:18134683-18139210	wild-type	V72G	OK	1.78427	15.3386	3.10376	-4.28242	1.84868e-05	0.00165354	yes
28	XLOC_011341	Eh	3R:13272363-13275250	wild-type	V72G	OK	5.73419	0.965313	-2.57052	4.22575	2.38144e-05	0.00203255	yes
29	XLOC_008708	intergenic	3L:10384384-10386080	wild-type	V72G	OK	3.25788	0.0889109	-5.19543	4.2188	2.45604e-05	0.0020774	yes
30	XLOC_010255	CG5909	3R:22986879-22988633	wild-type	V72G	OK	3.61703	13.2224	1.87011	-4.16341	3.13534e-05	0.00252297	yes
31	XLOC_009374	Hsp70Bbb	3R:8328231-8330822	wild-type	V72G	OK	15.6083	6.05227	-1.36676	4.15759	3.21622e-05	0.0025571	yes
32	XLOC_009376	Hsp70Bc	3R:8334797-8337008	wild-type	V72G	OK	16.8494	6.79589	-1.30996	3.9588	7.53273e-05	0.00502838	yes
33	XLOC_011060	Hsp70Ba	3R:8291025-8293500	wild-type	V72G	OK	13.6501	5.72761	-1.2529	3.74338	0.000181563	0.00993201	yes
1	XLOC_002974	Lcp4	2R:4325161-4325908	wild-type	Y107C	OK	117.82	26.6355	-2.14517	6.17067	6.80013e-10	2.05864e-07	yes
2	XLOC_003334	IM10	2R:9294510-9297458	wild-type	Y107C	OK	61.607	317.547	2.3658	-7.12472	1.04294e-12	5.39286e-10	yes
3	XLOC_003335	CG33470	2R:9299237-9302112	wild-type	Y107C	OK	61.7334	317.782	2.36391	-7.04484	1.85674e-12	8.9477e-10	yes
4	XLOC_003705	IM1,IM2	2R:14271456-14274535	wild-type	Y107C	OK	13.7186	394.699	4.84655	-7.81242	5.55112e-15	3.78116e-12	yes
5	XLOC_003707	IM3	2R:14275624-14275995	wild-type	Y107C	OK	10.6747	394.78	5.20879	-8.51837	0	0	yes
6	XLOC_005343	IM4	2R:16756340-16756826	wild-type	Y107C	OK	5.54309	100.7	4.18323	-6.65609	2.81206e-11	1.13832e-08	yes
7	XLOC_010872	Fst	3R:5463903-5475982	wild-type	Y107C	OK	29.1917	128.39	2.1369	-6.10813	1.00803e-09	2.91464e-07	yes
8	XLOC_000860	b	2L:13821202-13823894	wild-type	Y107C	OK	21.3641	68.2909	1.67651	-5.4758	4.35532e-08	9.46414e-06	yes
9	XLOC_005099	IM23	2R:14270208-14270737	wild-type	Y107C	OK	0	27.0696	1.79769e+308	1.79769e+308	2.06986e-05	0.00181415	yes
10	XLOC_003045	Cyp4p1,Cyp4p2	2R:5115285-5134752	wild-type	Y107C	OK	38.079	5.01858	-2.92364	5.68735	1.29024e-08	3.01652e-06	yes
11	XLOC_003840	CG13422	2R:16413831-16414331	wild-type	Y107C	OK	2.94037	44.0827	3.90614	-5.58963	2.27553e-08	5.13371e-06	yes
12	XLOC_003709	CG15065	2R:14277462-14277752	wild-type	Y107C	OK	5.37338	238.59	5.47256	-5.54425	2.95221e-08	6.5151e-06	yes
13	XLOC_002915	CG2070	2R:3549516-3550764	wild-type	Y107C	OK	13.2889	0.795333	-4.06252	5.0292	4.92541e-07	8.26816e-05	yes
14	XLOC_004795	CG13335	2R:9458888-9461734	wild-type	Y107C	OK	65.7083	149.486	1.18587	-3.95923	7.51911e-05	0.00502504	yes
15	XLOC_009274	CG4757	3R:6986923-6988868	wild-type	Y107C	OK	10.0005	23.6299	1.24054	-3.32188	0.000894141	0.0326837	yes
16	XLOC_003842	CG18067	2R:16422014-16422860	wild-type	Y107C	OK	199.999	423.582	1.08265	-3.65152	0.000260698	0.013107	yes
17	XLOC_011015	Hsp70Aa	3R:7779884-7782514	wild-type	Y107C	OK	38.1482	142.77	1.90401	-5.08336	3.70819e-07	6.48612e-05	yes
18	XLOC_009329	Hsp70Ab	3R:7784274-7788523	wild-type	Y107C	OK	45.6906	172.559	1.91712	-5.03689	4.73149e-07	7.96148e-05	yes
19	XLOC_001584	CG16713	2L:3695027-3695406	wild-type	Y107C	OK	248.633	541.229	1.12222	-3.59955	0.000318765	0.0153034	yes
20	XLOC_011916	spz	3R:22890712-22895982	wild-type	Y107C	OK	30.1574	82.7903	1.45695	-4.13167	3.60141e-05	0.00281283	yes
21	XLOC_003708	CG16836	2R:14276599-14276963	wild-type	Y107C	OK	0.81818	47.4198	5.85693	-3.96527	7.33116e-05	0.00492265	yes
22	XLOC_000572	CG3759	2L:9416592-9426344	wild-type	Y107C	OK	5.02336	1.6055	-1.64563	3.24128	0.00118994	0.040507	yes
23	XLOC_005955	CG13905	3L:902897-903614	wild-type	Y107C	OK	22.479	64.9321	1.53036	-4.05234	5.0708e-05	0.00368805	yes
24	XLOC_012332	intergenic	3R:25350708-25354289	wild-type	Y107C	OK	1.62056	0.304538	-2.4118	3.18696	0.00143778	0.0468717	yes
25	XLOC_009375	Hsp70Bb	3R:8331514-8334105	wild-type	Y107C	OK	22.1925	70.0505	1.65832	-4.59883	4.24864e-06	0.000513607	yes
26	XLOC_003863	IM14	2R:16757929-16758134	wild-type	Y107C	OK	12.3745	584.377	5.56146	-3.39181	0.000694335	0.02716	yes
27	XLOC_014619	upd2	X:18134683-18139210	wild-type	Y107C	OK	1.78427	12.2489	2.77925	-3.66495	0.000247391	0.0125605	yes
28	XLOC_011341	Eh	3R:13272363-13275250	wild-type	Y107C	OK	5.73419	0.739738	-2.9545	3.66594	0.000246428	0.0125229	yes
29	XLOC_008708	intergenic	3L:10384384-10386080	wild-type	Y107C	OK	3.25788	0.189757	-4.10171	3.41415	0.000639822	0.0257413	yes
30	XLOC_010255	CG5909	3R:22986879-22988633	wild-type	Y107C	OK	3.61703	21.135	2.54676	-5.4425	5.25388e-08	1.12442e-05	yes
31	XLOC_009374	Hsp70Bbb	3R:8328231-8330822	wild-type	Y107C	OK	15.6083	49.2468	1.65772	-4.55916	5.13579e-06	0.000595449	yes
32	XLOC_009376	Hsp70Bc	3R:8334797-8337008	wild-type	Y107C	OK	16.8494	54.5115	1.69386	-4.65317	3.26875e-06	0.00041276	yes
33	XLOC_011060	Hsp70Ba	3R:8291025-8293500	wild-type	Y107C	OK	13.6501	43.423	1.66955	-4.56734	4.93951e-06	0.000582222	yes
1	XLOC_002974	Lcp4	2R:4325161-4325908	wild-type	T205I	OK	117.82	48.2316	-1.28854	4.80397	1.55549e-06	0.000223965	yes
2	XLOC_003334	IM10	2R:9294510-9297458	wild-type	T205I	OK	61.607	298.602	2.27706	-8.10781	4.44089e-16	3.24322e-13	yes
3	XLOC_003335	CG33470	2R:9299237-9302112	wild-type	T205I	OK	61.7334	298.661	2.27438	-8.01812	1.11022e-15	7.86482e-13	yes
4	XLOC_003705	IM1,IM2	2R:14271456-14274535	wild-type	T205I	OK	13.7186	521.356	5.24807	-9.0622	0	0	yes
5	XLOC_003707	IM3	2R:14275624-14275995	wild-type	T205I	OK	10.6747	571.074	5.74142	-9.86542	0	0	yes
6	XLOC_005343	IM4	2R:16756340-16756826	wild-type	T205I	OK	5.54309	151.276	4.77035	-8.01283	1.11022e-15	7.86482e-13	yes
7	XLOC_010872	Fst	3R:5463903-5475982	wild-type	T205I	OK	29.1917	77.7553	1.41338	-4.40317	1.06681e-05	0.00106254	yes
8	XLOC_000860	b	2L:13821202-13823894	wild-type	T205I	OK	21.3641	48.7476	1.19014	-4.4454	8.77275e-06	0.000901196	yes
9	XLOC_005099	IM23	2R:14270208-14270737	wild-type	T205I	OK	0	27.6496	1.79769e+308	1.79769e+308	5.94811e-12	2.65009e-09	yes
10	XLOC_003045	Cyp4p1,Cyp4p2	2R:5115285-5134752	wild-type	T205I	OK	38.079	3.01084	-3.66075	8.59414	0	0	yes
11	XLOC_003840	CG13422	2R:16413831-16414331	wild-type	T205I	OK	2.94037	31.6917	3.43003	-5.1145	3.14575e-07	5.59912e-05	yes
12	XLOC_003709	CG15065	2R:14277462-14277752	wild-type	T205I	OK	5.37338	235.101	5.45131	-5.6959	1.22725e-08	2.89794e-06	yes
13	XLOC_002915	CG2070	2R:3549516-3550764	wild-type	T205I	OK	13.2889	2.46734	-2.4292	5.1116	3.19436e-07	5.65721e-05	yes
14	XLOC_004795	CG13335	2R:9458888-9461734	wild-type	T205I	OK	65.7083	136.767	1.05758	-4.1081	3.98927e-05	0.00303545	yes
15	XLOC_009274	CG4757	3R:6986923-6988868	wild-type	T205I	OK	10.0005	28.8033	1.52616	-4.67752	2.9037e-06	0.000374678	yes
16	XLOC_003842	CG18067	2R:16422014-16422860	wild-type	T205I	OK	199.999	479.492	1.26151	-5.06993	3.97965e-07	6.89288e-05	yes
17	XLOC_011015	Hsp70Aa	3R:7779884-7782514	wild-type	T205I	OK	38.1482	9.34439	-2.02944	6.59167	4.34908e-11	1.68354e-08	yes
18	XLOC_009329	Hsp70Ab	3R:7784274-7788523	wild-type	T205I	OK	45.6906	11.1486	-2.03504	6.42368	1.33021e-10	4.66494e-08	yes
19	XLOC_001584	CG16713	2L:3695027-3695406	wild-type	T205I	OK	248.633	460.698	0.889803	-3.27501	0.00105659	0.0370914	yes
20	XLOC_011916	spz	3R:22890712-22895982	wild-type	T205I	OK	30.1574	84.1276	1.48007	-4.80764	1.52722e-06	0.000220342	yes
21	XLOC_003708	CG16836	2R:14276599-14276963	wild-type	T205I	OK	0.81818	55.3078	6.07892	-4.19463	2.73318e-05	0.002254	yes
22	XLOC_000572	CG3759	2L:9416592-9426344	wild-type	T205I	OK	5.02336	1.90551	-1.39848	3.47118	0.000518176	0.0223146	yes
23	XLOC_005955	CG13905	3L:902897-903614	wild-type	T205I	OK	22.479	51.8163	1.20483	-3.51668	0.000436974	0.0195178	yes
24	XLOC_012332	intergenic	3R:25350708-25354289	wild-type	T205I	OK	1.62056	0.17293	-3.22823	4.30773	1.64937e-05	0.00152137	yes
25	XLOC_009375	Hsp70Bb	3R:8331514-8334105	wild-type	T205I	OK	22.1925	9.09616	-1.28674	4.25763	2.0661e-05	0.00181415	yes
26	XLOC_003863	IM14	2R:16757929-16758134	wild-type	T205I	OK	12.3745	726.645	5.87581	-3.64342	0.000269039	0.0134102	yes
27	XLOC_014619	upd2	X:18134683-18139210	wild-type	T205I	OK	1.78427	8.72657	2.29008	-3.17306	0.00150841	0.0486815	yes
28	XLOC_011341	Eh	3R:13272363-13275250	wild-type	T205I	OK	5.73419	1.16275	-2.30204	3.96735	7.26774e-05	0.00489225	yes
29	XLOC_008708	intergenic	3L:10384384-10386080	wild-type	T205I	OK	3.25788	0.124276	-4.71232	4.18536	2.8471e-05	0.00232628	yes
30	XLOC_010255	CG5909	3R:22986879-22988633	wild-type	T205I	OK	3.61703	10.889	1.58999	-3.57909	0.000344789	0.0161754	yes
31	XLOC_009374	Hsp70Bbb	3R:8328231-8330822	wild-type	T205I	OK	15.6083	6.00632	-1.37776	4.32576	1.52006e-05	0.00143002	yes
32	XLOC_009376	Hsp70Bc	3R:8334797-8337008	wild-type	T205I	OK	16.8494	6.51437	-1.371	4.25701	2.07178e-05	0.00181415	yes
33	XLOC_011060	Hsp70Ba	3R:8291025-8293500	wild-type	T205I	OK	13.6501	5.28879	-1.3679	4.1854	2.84667e-05	0.00232628	yes

## Sheet: V72G_only
Supplemental Table S19: Unique mRNA expression changes in SmnV72G transgenic line.
	gene_id	gene	locus	sample_1	sample_2	status	value_1	value_2	log2(fold_change)	test_stat	p_value	q_value	significant
1	XLOC_004473	Ance-4	2R:4927224-4929647	wild-type	V72G	OK	269.075	25.6667	-3.39004	11.939	0	0	yes
2	XLOC_013326	CG12481	X:14081285-14081874	wild-type	V72G	OK	198.811	4.28448	-5.53613	12.6537	0	0	yes
3	XLOC_013494	CG12998	X:17112914-17113527	wild-type	V72G	OK	253.817	46.0995	-2.46097	8.74107	0	0	yes
4	XLOC_004331	CG1850	2R:3146597-3148756	wild-type	V72G	OK	182.168	27.5767	-2.72375	9.64888	0	0	yes
5	XLOC_003571	CG6426	2R:12756896-12759359	wild-type	V72G	OK	151.314	21.4242	-2.82023	9.46142	0	0	yes
6	XLOC_007713	CG8539	3L:7490368-7491771	wild-type	V72G	OK	97.756	19.7541	-2.30703	8.34945	0	0	yes
7	XLOC_010459	Cpr100A	3R:26693244-26694908	wild-type	V72G	OK	107.372	19.2442	-2.48012	8.8085	0	0	yes
8	XLOC_007635	Cpr65Ax1	3L:6140630-6141715	wild-type	V72G	OK	194.986	21.4597	-3.18366	8.85265	0	0	yes
9	XLOC_007636	Cpr65Ax2	3L:6143501-6143955	wild-type	V72G	OK	194.986	21.4597	-3.18366	8.85808	0	0	yes
10	XLOC_008161	Eig71Ej	3L:15653648-15654115	wild-type	V72G	OK	402.439	29.143	-3.78755	11.5592	0	0	yes
11	XLOC_006815	Eig71Ek	3L:15654163-15655381	wild-type	V72G	OK	214.803	14.7626	-3.86299	9.30554	0	0	yes
12	XLOC_003507	Jhe	2R:12007193-12010281	wild-type	V72G	OK	230.459	19.3938	-3.57084	11.5987	0	0	yes
13	XLOC_012937	Spat	X:6422980-6424759	wild-type	V72G	OK	179.625	11.2312	-3.9994	13.7306	0	0	yes
14	XLOC_008295	CG43085	3L:17638618-17639767	wild-type	V72G	OK	22.3362	138.596	2.63343	-8.07659	6.66134e-16	4.8152e-13	yes
15	XLOC_004443	CG8736	2R:4481532-4482506	wild-type	V72G	OK	64.502	9.51278	-2.7614	7.92411	2.22045e-15	1.55739e-12	yes
16	XLOC_002213	l(2)34Fc	2L:14349113-14351510	wild-type	V72G	OK	218.834	49.6296	-2.14057	7.7425	9.76996e-15	6.34958e-12	yes
17	XLOC_006879	Cpr72Ea	3L:16355702-16356780	wild-type	V72G	OK	24.4117	1.28582	-4.24681	7.63627	2.24265e-14	1.41848e-11	yes
18	XLOC_010061	CG13618	3R:20350521-20353261	wild-type	V72G	OK	26.8154	2.27366	-3.55997	7.61032	2.73115e-14	1.69715e-11	yes
19	XLOC_008545	Cpr78E	3L:21659553-21660080	wild-type	V72G	OK	953.139	231.878	-2.03932	7.35033	1.9762e-13	1.11106e-10	yes
20	XLOC_008278	CG13731	3L:17376556-17382998	wild-type	V72G	OK	18.2257	3.80721	-2.25917	7.33589	2.20268e-13	1.22865e-10	yes
21	XLOC_007141	Cpr78Cc	3L:21293687-21294273	wild-type	V72G	OK	51.8134	3.6785	-3.81614	7.32806	2.33591e-13	1.29278e-10	yes
22	XLOC_008994	CG42537	3R:2203518-2206050	wild-type	V72G	OK	340.65	64.749	-2.39536	7.23613	4.61631e-13	2.49633e-10	yes
23	XLOC_004873	Cyp6a8	2R:10774672-10776514	wild-type	V72G	OK	0.947361	20.9575	4.46741	-7.20725	5.70877e-13	3.01798e-10	yes
24	XLOC_013284	CG32631	X:13450504-13451904	wild-type	V72G	OK	1013.26	214.316	-2.2412	7.11739	1.09979e-12	5.64557e-10	yes
25	XLOC_009342	CG3916	3R:8055177-8056041	wild-type	V72G	OK	50.5769	7.12157	-2.82821	7.11581	1.11244e-12	5.66946e-10	yes
26	XLOC_002441	CG10237	2L:19432592-19441278	wild-type	V72G	OK	99.818	19.4895	-2.3566	7.04953	1.79523e-12	8.77063e-10	yes
27	XLOC_001690	obst-E	2L:5762552-5766141	wild-type	V72G	OK	111.99	20.8673	-2.42406	6.96999	3.16969e-12	1.47724e-09	yes
28	XLOC_011918	Cpr97Eb	3R:22915325-22916904	wild-type	V72G	OK	56.4822	11.9146	-2.24506	6.93475	4.06941e-12	1.85985e-09	yes
29	XLOC_002226	CG42680	2L:14587987-14588234	wild-type	V72G	OK	230.289	1582.99	2.78114	-6.9005	5.18208e-12	2.35319e-09	yes
30	XLOC_002437	fon	2L:19383386-19386202	wild-type	V72G	OK	1081.06	225.278	-2.26268	6.72626	1.74081e-11	7.3404e-09	yes
31	XLOC_009054	CG14598	3R:3265487-3267714	wild-type	V72G	OK	17.0746	1.93216	-3.14357	6.71938	1.82498e-11	7.64982e-09	yes
32	XLOC_006217	CG15212	3L:5124649-5125229	wild-type	V72G	OK	1695.23	458.482	-1.88654	6.71176	1.92288e-11	7.9844e-09	yes
33	XLOC_001205	CG9331	2L:20824435-20827746	wild-type	V72G	OK	60.2035	13.3848	-2.16925	6.64792	2.97264e-11	1.18305e-08	yes
34	XLOC_011785	CG13641	3R:20688653-20690502	wild-type	V72G	OK	161.276	41.2747	-1.9662	6.59025	4.3908e-11	1.69046e-08	yes
35	XLOC_009010	Edg84A	3R:2510171-2510855	wild-type	V72G	OK	613.487	177	-1.79328	6.58171	4.65057e-11	1.78079e-08	yes
36	XLOC_004318	Tsp42Ep	2R:2942217-2945040	wild-type	V72G	OK	134.234	38.9232	-1.78604	6.42153	1.34914e-10	4.70804e-08	yes
37	XLOC_000623	Cpr31A	2L:10054214-10055935	wild-type	V72G	OK	23.738	4.141	-2.51915	6.39976	1.55625e-10	5.3517e-08	yes
38	XLOC_000456	CG7191	2L:7767627-7775058	wild-type	V72G	OK	7.2228	45.8893	2.66753	-6.3808	1.76166e-10	5.9998e-08	yes
39	XLOC_006880	Cpr72Eb	3L:16358096-16358750	wild-type	V72G	OK	604.469	185.169	-1.70682	6.25359	4.0112e-10	1.27997e-07	yes
40	XLOC_010646	Obp83g	3R:1937391-1938019	wild-type	V72G	OK	301.075	93.4836	-1.68734	6.24408	4.26305e-10	1.3422e-07	yes
41	XLOC_010129	CG11852	3R:21063346-21064617	wild-type	V72G	OK	31.6584	6.48516	-2.28738	6.22195	4.91006e-10	1.53228e-07	yes
42	XLOC_007629	Lcp65Ag2	3L:6126088-6126700	wild-type	V72G	OK	919.324	280.065	-1.71481	6.18818	6.08628e-10	1.85044e-07	yes
43	XLOC_006268	Lcp65Ad	3L:6136506-6137109	wild-type	V72G	OK	4730.13	1138.96	-2.05416	6.1534	7.58398e-10	2.26687e-07	yes
44	XLOC_013517	CG6788	X:17782209-17783437	wild-type	V72G	OK	16.7636	2.68274	-2.64355	6.14406	8.04369e-10	2.38416e-07	yes
45	XLOC_012318	intergenic	3R:20802532-20809637	wild-type	V72G	OK	0.0906973	2.47677	4.77125	-6.13559	8.48441e-10	2.48362e-07	yes
46	XLOC_008518	Edg78E	3L:21289862-21290903	wild-type	V72G	OK	1871.2	469.95	-1.99339	6.12405	9.1228e-10	2.6486e-07	yes
47	XLOC_011347	Edg91	3R:13436577-13437233	wild-type	V72G	OK	181.636	52.6792	-1.78575	6.07595	1.23257e-09	3.54941e-07	yes
48	XLOC_005341	CG17999	2R:16735484-16737424	wild-type	V72G	OK	0.493903	11.583	4.55164	-6.06534	1.31679e-09	3.77656e-07	yes
49	XLOC_007569	CG15213	3L:5125997-5126245	wild-type	V72G	OK	468.854	65.5672	-2.83809	6.053	1.42177e-09	4.06122e-07	yes
50	XLOC_006813	Eig71Eg	3L:15650727-15651258	wild-type	V72G	OK	676.44	221.944	-1.60776	6.04992	1.44918e-09	4.12289e-07	yes
51	XLOC_010200	CG6142	3R:21958894-21962791	wild-type	V72G	OK	19.4051	4.15121	-2.22484	6.00581	1.90378e-09	5.35173e-07	yes
52	XLOC_005975	CG9134	3L:1256451-1274498	wild-type	V72G	OK	98.577	28.0531	-1.81309	5.95391	2.61817e-09	7.21676e-07	yes
53	XLOC_006589	CG32091	3L:11624494-11636004	wild-type	V72G	OK	45.712	14.8732	-1.61986	5.90587	3.50789e-09	9.52104e-07	yes
54	XLOC_008556	CG14565	3L:21736343-21737364	wild-type	V72G	OK	27.4297	6.46762	-2.08444	5.90306	3.56813e-09	9.6109e-07	yes
55	XLOC_010732	pyd3	3R:3573634-3575798	wild-type	V72G	OK	27.7205	7.19691	-1.9455	5.88632	3.94898e-09	1.05964e-06	yes
56	XLOC_007088	CG5847	3L:20406533-20419213	wild-type	V72G	OK	12.8559	2.8577	-2.1695	5.86512	4.48814e-09	1.18634e-06	yes
57	XLOC_004293	l(2)01289	2R:2608605-2628154	wild-type	V72G	OK	10.4931	1.7832	-2.5569	5.85654	4.72616e-09	1.24e-06	yes
58	XLOC_000501	CG7778	2L:8346620-8350197	wild-type	V72G	OK	38.6403	124.262	1.6852	-5.7952	6.82415e-09	1.76432e-06	yes
59	XLOC_004841	Cpr51A	2R:10400046-10402713	wild-type	V72G	OK	2860.92	728.009	-1.97445	5.78687	7.17083e-09	1.84051e-06	yes
60	XLOC_003424	CG10131	2R:10517417-10518526	wild-type	V72G	OK	64.2184	19.758	-1.70055	5.78405	7.29254e-09	1.86499e-06	yes
61	XLOC_003573	CG6429,CG6435	2R:12760521-12783156	wild-type	V72G	OK	37.6241	1.89852	-4.30871	5.77735	7.58875e-09	1.93377e-06	yes
62	XLOC_001628	CG3244	2L:4796583-4801923	wild-type	V72G	OK	210.585	71.0407	-1.56769	5.7573	8.54708e-09	2.16241e-06	yes
63	XLOC_014231	CG15199	X:11034503-11035868	wild-type	V72G	OK	40.2063	8.07224	-2.31638	5.73486	9.75929e-09	2.40453e-06	yes
64	XLOC_007541	CG13722	3L:4485080-4490953	wild-type	V72G	OK	49.7828	8.1371	-2.61306	5.73348	9.83879e-09	2.4117e-06	yes
65	XLOC_011718	CG12268	3R:19769349-19774141	wild-type	V72G	OK	173.53	54.2019	-1.67877	5.73068	1.0003e-08	2.4351e-06	yes
66	XLOC_006148	CG10853	3L:3947911-3948685	wild-type	V72G	OK	208.641	69.0825	-1.59463	5.70277	1.17874e-08	2.81151e-06	yes
67	XLOC_013753	CG14787	X:1354839-1355700	wild-type	V72G	OK	27.182	5.00538	-2.4411	5.6915	1.25928e-08	2.9637e-06	yes
68	XLOC_006997	CG6865	3L:18856747-18858618	wild-type	V72G	OK	11.8114	0.960435	-3.62035	5.68641	1.29735e-08	3.02317e-06	yes
69	XLOC_011917	Cpr97Ea	3R:22908582-22913487	wild-type	V72G	OK	23.3957	5.68348	-2.0414	5.66765	1.44767e-08	3.3624e-06	yes
70	XLOC_011649	CG13833	3R:18859005-18861285	wild-type	V72G	OK	12.5583	1.35765	-3.20946	5.63388	1.76197e-08	4.05254e-06	yes
71	XLOC_005062	CG6385	2R:13641051-13643923	wild-type	V72G	OK	26.6028	8.74885	-1.60441	5.62877	1.81495e-08	4.14746e-06	yes
72	XLOC_011622	CG5326	3R:18357895-18365639	wild-type	V72G	OK	36.7478	11.9798	-1.61705	5.44713	5.11892e-08	1.09886e-05	yes
73	XLOC_007712	Cyp4d8	3L:7486648-7489279	wild-type	V72G	OK	12.6129	2.67734	-2.23603	5.44051	5.31296e-08	1.13364e-05	yes
74	XLOC_007630	Lcp65Ag1	3L:6127796-6128370	wild-type	V72G	OK	118.563	37.9121	-1.64492	5.39994	6.6664e-08	1.41391e-05	yes
75	XLOC_008159	Eig71Ef	3L:15649754-15650501	wild-type	V72G	OK	797.687	295.511	-1.43261	5.394	6.89045e-08	1.45274e-05	yes
76	XLOC_006262	CG6602	3L:6065243-6068340	wild-type	V72G	OK	22.5	4.89558	-2.20037	5.35228	8.68521e-08	1.77308e-05	yes
77	XLOC_000443	CG5973	2L:7437505-7445269	wild-type	V72G	OK	77.6017	22.9989	-1.75452	5.34582	9.00071e-08	1.83221e-05	yes
78	XLOC_003404	CG17386	2R:10307845-10312099	wild-type	V72G	OK	55.4067	20.5101	-1.43373	5.33031	9.80473e-08	1.95739e-05	yes
79	XLOC_000333	Oscillin	2L:5547062-5549685	wild-type	V72G	OK	257.36	82.1062	-1.64822	5.30435	1.13075e-07	2.24375e-05	yes
80	XLOC_010204	CG33970	3R:22144079-22187711	wild-type	V72G	OK	39.6157	12.7411	-1.63658	5.29646	1.1807e-07	2.32336e-05	yes
81	XLOC_007899	CG6409	3L:10872185-10876588	wild-type	V72G	OK	382.149	130.03	-1.55529	5.27808	1.30545e-07	2.55465e-05	yes
82	XLOC_000946	CR42791	2L:15863224-15863650	wild-type	V72G	OK	63.9569	272.949	2.09346	-5.21906	1.79835e-07	3.40629e-05	yes
83	XLOC_011215	CG6687	3R:11032417-11034484	wild-type	V72G	OK	39.466	107.472	1.44527	-5.21796	1.809e-07	3.40823e-05	yes
84	XLOC_013071	CG15369	X:9110925-9111401	wild-type	V72G	OK	425.941	160.758	-1.40576	5.1963	2.03297e-07	3.78988e-05	yes
85	XLOC_013878	yin	X:3756995-3762359	wild-type	V72G	OK	27.5752	9.49481	-1.53816	5.15713	2.50767e-07	4.56434e-05	yes
86	XLOC_007627	Lcp65Ag3	3L:6123484-6124086	wild-type	V72G	OK	66.8802	19.4049	-1.78516	5.14959	2.61051e-07	4.71757e-05	yes
87	XLOC_003742	CG33998	2R:14605633-14642026	wild-type	V72G	OK	683.836	246.201	-1.47381	5.14878	2.62187e-07	4.72603e-05	yes
88	XLOC_006375	CG13678	3L:8215242-8216051	wild-type	V72G	OK	66.3694	17.8565	-1.89407	5.137	2.79159e-07	5.0192e-05	yes
89	XLOC_010671	Ccp84Ae	3R:2516611-2517480	wild-type	V72G	OK	76.5916	25.1534	-1.60643	5.13313	2.84967e-07	5.09774e-05	yes
90	XLOC_013322	CG1368	X:14068793-14069703	wild-type	V72G	OK	74.3194	25.0124	-1.57109	5.09724	3.44647e-07	6.05826e-05	yes
91	XLOC_006307	Cpr65Ec	3L:7086308-7086943	wild-type	V72G	OK	837.645	319.132	-1.39218	5.07246	3.92706e-07	6.83521e-05	yes
92	XLOC_000425	Pcp	2L:7014860-7023940	wild-type	V72G	OK	452.248	28.9725	-3.96436	5.01244	5.37448e-07	8.83361e-05	yes
93	XLOC_009836	TotC	3R:16698709-16699310	wild-type	V72G	OK	6.60743	42.7662	2.69431	-4.98315	6.25581e-07	0.00010141	yes
94	XLOC_005793	intergenic	2R:5378125-5381354	wild-type	V72G	OK	0.169265	4.10201	4.59897	-4.95595	7.19762e-07	0.000115357	yes
95	XLOC_011984	CG14062	3R:24467305-24468613	wild-type	V72G	OK	109.409	43.439	-1.33267	4.95329	7.29677e-07	0.000116158	yes
96	XLOC_011557	SIFR	3R:17102385-17119720	wild-type	V72G	OK	0.0946349	2.10933	4.47827	-4.94897	7.46083e-07	0.000117974	yes
97	XLOC_011109	CG14375	3R:9214778-9220912	wild-type	V72G	OK	138.527	54.1369	-1.35548	4.9328	8.10579e-07	0.000126758	yes
98	XLOC_010724	alpha-Est8	3R:3335064-3341391	wild-type	V72G	OK	6.52453	1.52613	-2.09599	4.9226	8.5403e-07	0.000132966	yes
99	XLOC_007394	CG1887	3L:1893415-1910197	wild-type	V72G	OK	30.9932	12.0432	-1.36374	4.90948	9.13202e-07	0.000141556	yes
100	XLOC_001636	hoe1	2L:4908744-4932296	wild-type	V72G	OK	20.4353	6.33339	-1.69001	4.90409	9.38605e-07	0.000145176	yes
101	XLOC_011211	CG6904	3R:10967561-10973329	wild-type	V72G	OK	33.063	11.9031	-1.47388	4.89341	9.91061e-07	0.000152292	yes
102	XLOC_013151	CG15202	X:11036712-11037412	wild-type	V72G	OK	74.4581	16.9213	-2.13759	4.86459	1.14693e-06	0.000173237	yes
103	XLOC_000821	CG16820	2L:13246230-13250193	wild-type	V72G	OK	44.2676	16.8028	-1.39755	4.83677	1.31968e-06	0.000196156	yes
104	XLOC_006928	CG7724	3L:17048717-17051633	wild-type	V72G	OK	27.1351	9.22229	-1.55696	4.81904	1.44249e-06	0.000210692	yes
105	XLOC_004791	Vmat	2R:9400631-9421913	wild-type	V72G	OK	7.925	0.828508	-3.25782	4.80307	1.56254e-06	0.000224524	yes
106	XLOC_010303	Mst98Ca	3R:24117054-24118385	wild-type	V72G	OK	20.4435	58.4101	1.51458	-4.78512	1.70888e-06	0.000241631	yes
107	XLOC_006859	CG13067	3L:16264408-16265019	wild-type	V72G	OK	100.004	34.9633	-1.51614	4.78004	1.75263e-06	0.000246874	yes
108	XLOC_006811	Eig71Eb	3L:15643060-15643641	wild-type	V72G	OK	947.943	389.519	-1.28311	4.78	1.75293e-06	0.000246874	yes
109	XLOC_006525	CG32063	3L:10458286-10461580	wild-type	V72G	OK	54.4474	134.118	1.30057	-4.77562	1.79157e-06	0.00025082	yes
110	XLOC_006960	CG7402	3L:17880803-17884504	wild-type	V72G	OK	7.97254	1.10988	-2.84464	4.77298	1.81524e-06	0.000253133	yes
111	XLOC_002291	CG34168	2L:16134706-16135710	wild-type	V72G	OK	150.197	395.693	1.39752	-4.7706	1.83675e-06	0.000255629	yes
112	XLOC_013140	CG2145	X:10821431-10823745	wild-type	V72G	OK	25.849	9.88679	-1.38653	4.74622	2.07253e-06	0.000283433	yes
113	XLOC_011301	CG10345	3R:12420819-12430571	wild-type	V72G	OK	11.064	2.42911	-2.18738	4.73432	2.19789e-06	0.000296568	yes
114	XLOC_010535	CG31522	3R:267056-288794	wild-type	V72G	OK	56.202	18.7523	-1.58355	4.68637	2.78093e-06	0.00036147	yes
115	XLOC_007496	CG10863	3L:3941007-3942461	wild-type	V72G	OK	86.1791	35.6041	-1.2753	4.6607	3.15139e-06	0.000402242	yes
116	XLOC_000621	obst-B	2L:10032693-10038954	wild-type	V72G	OK	157.504	66.803	-1.2374	4.65828	3.18857e-06	0.000405526	yes
117	XLOC_013283	Cpr12A	X:13437675-13438952	wild-type	V72G	OK	86.3424	34.2314	-1.33475	4.65701	3.20837e-06	0.000407314	yes
118	XLOC_006526	CG32064	3L:10483960-10486035	wild-type	V72G	OK	61.7114	150.431	1.2855	-4.65258	3.27805e-06	0.000413197	yes
119	XLOC_007178	CG14564	3L:21738458-21764426	wild-type	V72G	OK	89.9301	32.6913	-1.4599	4.64331	3.42864e-06	0.000429885	yes
120	XLOC_009140	CG8369	3R:4647553-4648563	wild-type	V72G	OK	308.648	112.579	-1.45502	4.63599	3.55231e-06	0.000441483	yes
121	XLOC_005384	cv-2	2R:17242343-17266967	wild-type	V72G	OK	8.01776	22.9906	1.51978	-4.63205	3.62055e-06	0.000449177	yes
122	XLOC_008099	CG9238	3L:14534030-14544198	wild-type	V72G	OK	47.0021	18.9065	-1.31385	4.61322	3.96471e-06	0.000485917	yes
123	XLOC_009119	CG31259	3R:4349667-4351846	wild-type	V72G	OK	3.71423	0.363218	-3.35415	4.60792	4.06726e-06	0.000495911	yes
124	XLOC_000951	CG4793	2L:15905133-15962432	wild-type	V72G	OK	8.95976	36.052	2.00854	-4.60278	4.16894e-06	0.000505889	yes
125	XLOC_010050	CG33340	3R:20188868-20192071	wild-type	V72G	OK	27.2716	72.6858	1.41428	-4.57821	4.6898e-06	0.000559302	yes
126	XLOC_002984	CG14752	2R:4478000-4479452	wild-type	V72G	OK	309.524	132.195	-1.22739	4.56805	4.92291e-06	0.000581231	yes
127	XLOC_000183	CG17264	2L:3018507-3023169	wild-type	V72G	OK	27.4219	8.6579	-1.66324	4.56667	4.9554e-06	0.000582314	yes
128	XLOC_004607	Cpr47Ec	2R:7143771-7147344	wild-type	V72G	OK	192.048	70.2004	-1.45191	4.56554	4.98204e-06	0.000582389	yes
129	XLOC_004801	CG13340	2R:9657419-9675310	wild-type	V72G	OK	70.916	167.408	1.23918	-4.56362	5.0279e-06	0.00058498	yes
130	XLOC_005312	CG11192	2R:16241609-16242558	wild-type	V72G	OK	80.8349	32.7793	-1.3022	4.54766	5.42448e-06	0.000624829	yes
131	XLOC_013204	regucalcin	X:11906466-11911091	wild-type	V72G	OK	871.944	326.505	-1.41713	4.5333	5.80679e-06	0.000663473	yes
132	XLOC_000451	TepIII	2L:7702806-7710697	wild-type	V72G	OK	17.6433	7.45203	-1.24341	4.53281	5.82043e-06	0.00066396	yes
133	XLOC_005525	CG3124	2R:19170264-19171636	wild-type	V72G	OK	48.8684	118.198	1.27423	-4.51741	6.25997e-06	0.000703898	yes
134	XLOC_011803	CG34027	3R:20928225-20934776	wild-type	V72G	OK	4.60212	1.40455	-1.71219	4.5162	6.29596e-06	0.000706824	yes
135	XLOC_001771	CG17377	2L:6801362-6802830	wild-type	V72G	OK	61.3537	152.877	1.31715	-4.51115	6.44775e-06	0.000717047	yes
136	XLOC_010749	CG2781	3R:3807538-3821568	wild-type	V72G	OK	27.8043	11.115	-1.3228	4.50807	6.54196e-06	0.000724113	yes
137	XLOC_000902	CG4691	2L:14760766-14761933	wild-type	V72G	OK	33.9125	85.2502	1.32988	-4.49327	7.01365e-06	0.000759679	yes
138	XLOC_008156	Eig71Ea	3L:15642219-15642755	wild-type	V72G	OK	1269.15	548.684	-1.20982	4.47692	7.5728e-06	0.000809136	yes
139	XLOC_004603	CG13216	2R:7125612-7126499	wild-type	V72G	OK	81.6108	33.3365	-1.29166	4.4664	7.95453e-06	0.000834813	yes
140	XLOC_011903	CG6330	3R:22775414-22784209	wild-type	V72G	OK	47.1921	113.282	1.2633	-4.44864	8.64141e-06	0.000891059	yes
141	XLOC_004851	CG12861	2R:10551750-10552856	wild-type	V72G	OK	48.1885	116.164	1.2694	-4.44528	8.77789e-06	0.000901196	yes
142	XLOC_004676	CG8888	2R:7952067-7967046	wild-type	V72G	OK	73.489	32.2523	-1.18812	4.43179	9.3454e-06	0.000950431	yes
143	XLOC_010644	Gasp	3R:1914950-1926609	wild-type	V72G	OK	732.47	279.22	-1.39137	4.43067	9.39411e-06	0.000952044	yes
144	XLOC_007633	Cpr65Av	3L:6132322-6133073	wild-type	V72G	OK	12.5099	1.51774	-3.04307	4.42563	9.61629e-06	0.000970396	yes
145	XLOC_006939	CG7589	3L:17463525-17467617	wild-type	V72G	OK	9.56341	2.90082	-1.72107	4.41975	9.88141e-06	0.000994317	yes
146	XLOC_010228	CG14247	3R:22563347-22564315	wild-type	V72G	OK	0.383799	8.47659	4.46506	-4.41485	1.01082e-05	0.0010157	yes
147	XLOC_004994	CG15615	2R:12680620-12683912	wild-type	V72G	OK	131.668	58.4812	-1.17085	4.41124	1.02781e-05	0.00102839	yes
148	XLOC_001580	CG16704	2L:3692126-3692588	wild-type	V72G	OK	1850.15	805.981	-1.19882	4.38547	1.15733e-05	0.00114345	yes
149	XLOC_005072	proPO-A1	2R:13761429-13813769	wild-type	V72G	OK	5.03713	18.7718	1.89789	-4.38035	1.1849e-05	0.00116905	yes
150	XLOC_000251	CG2955	2L:4149278-4151203	wild-type	V72G	OK	30.7155	72.0654	1.23034	-4.37899	1.19232e-05	0.00117311	yes
151	XLOC_003541	CG4439	2R:12378604-12380738	wild-type	V72G	OK	51.8525	117.822	1.18413	-4.37515	1.21351e-05	0.00118728	yes
152	XLOC_014818	Cda4	X:21985465-22034545	wild-type	V72G	OK	165.324	73.2063	-1.17526	4.36733	1.25773e-05	0.00121884	yes
153	XLOC_008352	ftz-f1	3L:18743593-18791831	wild-type	V72G	OK	95.0224	37.6568	-1.33536	4.36235	1.28671e-05	0.00124352	yes
154	XLOC_004708	CG8834	2R:8307315-8309988	wild-type	V72G	OK	8.3035	1.47685	-2.4912	4.35955	1.30328e-05	0.00125782	yes
155	XLOC_005022	CG12699	2R:13134034-13134888	wild-type	V72G	OK	140.147	317.243	1.17864	-4.34727	1.3784e-05	0.00132205	yes
156	XLOC_007177	CG14572	3L:21734638-21735542	wild-type	V72G	OK	18.1254	5.10184	-1.82892	4.34614	1.38555e-05	0.00132638	yes
157	XLOC_002546	CG31988	2L:21201534-21202742	wild-type	V72G	OK	60.0842	140.344	1.22391	-4.33875	1.43297e-05	0.00136808	yes
158	XLOC_005319	CG13430,Cpr57A	2R:16435871-16439591	wild-type	V72G	OK	36.7207	10.0097	-1.8752	4.33676	1.44601e-05	0.00137566	yes
159	XLOC_009335	ssp5	3R:7858863-7861247	wild-type	V72G	OK	11.389	28.7809	1.33748	-4.33437	1.46175e-05	0.00138756	yes
160	XLOC_006408	CG6372	3L:8610334-8612574	wild-type	V72G	OK	101.318	231.819	1.19411	-4.33155	1.48065e-05	0.00139666	yes
161	XLOC_003543	loopin-1	2R:12422454-12424591	wild-type	V72G	OK	73.2691	180.921	1.30409	-4.32197	1.54646e-05	0.00144909	yes
162	XLOC_006812	Eig71Ed	3L:15645643-15646204	wild-type	V72G	OK	1383.73	614.027	-1.17219	4.31733	1.5793e-05	0.00147208	yes
163	XLOC_006549	CG32081	3L:11020678-11022545	wild-type	V72G	OK	17.2226	44.7616	1.37796	-4.31526	1.59414e-05	0.00147995	yes
164	XLOC_011137	Mst87F	3R:9652866-9653432	wild-type	V72G	OK	99.3608	247.977	1.31946	-4.3131	1.60981e-05	0.00148876	yes
165	XLOC_006372	CG13679	3L:8195739-8196446	wild-type	V72G	OK	54.8078	14.8071	-1.88809	4.30494	1.67034e-05	0.00153273	yes
166	XLOC_003760	CG15109	2R:14946925-14948575	wild-type	V72G	OK	53.4568	121.636	1.18613	-4.30516	1.66865e-05	0.00153273	yes
167	XLOC_007333	CG9119	3L:1203305-1204792	wild-type	V72G	OK	9.84484	2.54608	-1.95109	4.29422	1.75308e-05	0.0015879	yes
168	XLOC_014723	CG12655	X:19852421-19853421	wild-type	V72G	OK	18.6481	59.3901	1.6712	-4.27034	1.95176e-05	0.00173479	yes
169	XLOC_004975	CG7813	2R:12384393-12386934	wild-type	V72G	OK	16.1865	37.9132	1.22791	-4.26725	1.97897e-05	0.00175019	yes
170	XLOC_014745	CG17065	X:20125717-20128157	wild-type	V72G	OK	16.3396	5.72596	-1.51278	4.26296	2.01738e-05	0.00177971	yes
171	XLOC_002999	PGRP-SC2	2R:4604471-4605026	wild-type	V72G	OK	26.1123	76.5528	1.55172	-4.2478	2.15883e-05	0.00187877	yes
172	XLOC_004852	CG12860	2R:10553145-10554322	wild-type	V72G	OK	27.3401	66.2204	1.27626	-4.24119	2.2234e-05	0.00192358	yes
173	XLOC_014917	CG43229	X:18032635-18033181	wild-type	V72G	OK	16.9643	2.82331	-2.58704	4.23225	2.3136e-05	0.00197941	yes
174	XLOC_010848	betaTub85D	3R:5234074-5236004	wild-type	V72G	OK	67.0943	147.399	1.13546	-4.21867	2.45746e-05	0.0020774	yes
175	XLOC_014186	CG15306	X:10224188-10225814	wild-type	V72G	OK	16.8098	41.3589	1.2989	-4.21141	2.53778e-05	0.00213511	yes
176	XLOC_002431	CG42688	2L:19182181-19182820	wild-type	V72G	OK	49.851	127.735	1.35746	-4.20903	2.56466e-05	0.00215261	yes
177	XLOC_008955	CG1213	3R:1666794-1672290	wild-type	V72G	OK	26.7091	8.54479	-1.64422	4.20804	2.57598e-05	0.00215955	yes
178	XLOC_010592	CG31547	3R:1315226-1328424	wild-type	V72G	OK	24.5183	10.7575	-1.18852	4.19656	2.71003e-05	0.00224412	yes
179	XLOC_010701	CG1288	3R:3033094-3034137	wild-type	V72G	OK	23.8853	60.0341	1.32966	-4.19071	2.78084e-05	0.00228532	yes
180	XLOC_014650	Cyp18a1	X:18582569-18586778	wild-type	V72G	OK	36.4305	16.6961	-1.12564	4.18272	2.88044e-05	0.00234271	yes
181	XLOC_000041	Hsp60B	2L:728411-730564	wild-type	V72G	OK	17.3486	40.7572	1.23223	-4.16627	3.09623e-05	0.00250099	yes
182	XLOC_008255	CG13023	3L:16917437-16920534	wild-type	V72G	OK	4.99269	1.10597	-2.17451	4.16324	3.13769e-05	0.00252297	yes
183	XLOC_000339	Hsp60C	2L:5662848-5670842	wild-type	V72G	OK	31.9157	73.7681	1.20873	-4.15862	3.20176e-05	0.00255132	yes
184	XLOC_006409	CG32351	3L:8612987-8616990	wild-type	V72G	OK	54.7387	125.94	1.20211	-4.15379	3.27009e-05	0.0025941	yes
185	XLOC_003456	Fs	2R:11105885-11129084	wild-type	V72G	OK	16.324	41.0946	1.33195	-4.15216	3.29351e-05	0.00260976	yes
186	XLOC_002241	Mst35Bb	2L:14882100-14883715	wild-type	V72G	OK	33.7207	86.6353	1.36132	-4.14362	3.41859e-05	0.00269081	yes
187	XLOC_013629	obst-A	X:20110933-20114254	wild-type	V72G	OK	815.539	315.379	-1.37067	4.11074	3.94402e-05	0.00300747	yes
188	XLOC_003549	CG5089	2R:12482532-12492716	wild-type	V72G	OK	48.2846	108.678	1.17042	-4.10109	4.1121e-05	0.00310556	yes
189	XLOC_002028	CG7300	2L:10695208-10698024	wild-type	V72G	OK	1.80097	0.173266	-3.37772	4.0951	4.21986e-05	0.00317004	yes
190	XLOC_002073	CG14926	2L:11342312-11343263	wild-type	V72G	OK	35.3536	87.946	1.31476	-4.09077	4.29935e-05	0.00322634	yes
191	XLOC_002047	CG7309	2L:10906269-10908812	wild-type	V72G	OK	10.8074	27.4739	1.34605	-4.08114	4.48161e-05	0.00334892	yes
192	XLOC_011150	CG9920	3R:9923014-9923802	wild-type	V72G	OK	97.915	217.39	1.15068	-4.06967	4.70801e-05	0.00346774	yes
193	XLOC_014236	CG1394	X:11063854-11064681	wild-type	V72G	OK	37.7226	90.0827	1.25582	-4.06724	4.75734e-05	0.00349595	yes
194	XLOC_002619	CG15219	2L:22104879-22105506	wild-type	V72G	OK	82.2669	192.136	1.22374	-4.06479	4.8075e-05	0.00352915	yes
195	XLOC_004287	Tdc1	2R:2561113-2580186	wild-type	V72G	OK	6.22573	21.0163	1.75519	-4.04343	5.26754e-05	0.00379644	yes
196	XLOC_009534	CG5302	3R:11458604-11464977	wild-type	V72G	OK	7.25266	23.6004	1.70223	-4.03823	5.38564e-05	0.00386826	yes
197	XLOC_003727	CG10924	2R:14414936-14423263	wild-type	V72G	OK	15.1886	33.2495	1.13034	-4.03653	5.42484e-05	0.0038857	yes
198	XLOC_010268	CG13978	3R:23289910-23292725	wild-type	V72G	OK	10.9503	26.076	1.25176	-4.03657	5.4238e-05	0.0038857	yes
199	XLOC_010714	Mst84Db	3R:3190879-3191349	wild-type	V72G	OK	90.7191	223.713	1.30217	-4.02848	5.61382e-05	0.0039928	yes
200	XLOC_012082	CG31025	3R:25951354-25954841	wild-type	V72G	OK	16.2182	38.2637	1.23836	-4.02114	5.79177e-05	0.00410335	yes
201	XLOC_011634	CG4907,wge	3R:18533507-18546878	wild-type	V72G	OK	8.54505	20.475	1.26071	-4.0051	6.1992e-05	0.00431811	yes
202	XLOC_009545	CG5614	3R:11605526-11606814	wild-type	V72G	OK	23.9875	55.163	1.20142	-4.00261	6.26473e-05	0.00433163	yes
203	XLOC_014527	CG9782	X:16509004-16515619	wild-type	V72G	OK	41.4346	18.0173	-1.20145	4.00251	6.26753e-05	0.00433163	yes
204	XLOC_014172	CG15251	X:9861325-9871423	wild-type	V72G	OK	121.072	51.4867	-1.23359	3.99858	6.37245e-05	0.00438702	yes
205	XLOC_010874	CG9444	3R:5505662-5509745	wild-type	V72G	OK	38.9594	13.2427	-1.55678	3.97978	6.89804e-05	0.00469411	yes
206	XLOC_011672	CG4408	3R:19187610-19189760	wild-type	V72G	OK	83.3991	40.069	-1.05755	3.96885	7.22214e-05	0.00487661	yes
207	XLOC_000338	CG18266	2L:5596832-5598636	wild-type	V72G	OK	15.0905	34.8756	1.20858	-3.96761	7.25957e-05	0.00489225	yes
208	XLOC_011906	CG31075	3R:22804265-22814237	wild-type	V72G	OK	354.733	161.821	-1.13233	3.96328	7.39266e-05	0.00495924	yes
209	XLOC_007145	CG32436	3L:21337132-21348149	wild-type	V72G	OK	15.0844	32.7142	1.11686	-3.95852	7.54141e-05	0.00502838	yes
210	XLOC_009316	CG14718	3R:7526335-7528442	wild-type	V72G	OK	19.3654	42.9434	1.14895	-3.95607	7.61929e-05	0.00507285	yes
211	XLOC_012083	CG31029	3R:25955010-25958117	wild-type	V72G	OK	17.225	37.1037	1.10706	-3.95064	7.79441e-05	0.00516848	yes
212	XLOC_013929	TrxT	X:5204613-5205921	wild-type	V72G	OK	24.4839	57.2641	1.2258	-3.95026	7.80672e-05	0.00516848	yes
213	XLOC_000944	CG18109	2L:15784107-15790050	wild-type	V72G	OK	5.61697	12.7465	1.18224	-3.94678	7.92096e-05	0.00521973	yes
214	XLOC_002172	CG10859	2L:13396391-13398664	wild-type	V72G	OK	17.5964	39.3199	1.15998	-3.94308	8.04425e-05	0.00526668	yes
215	XLOC_006858	CG13068	3L:16262490-16262934	wild-type	V72G	OK	54.1036	15.7929	-1.77645	3.93828	8.2069e-05	0.00535338	yes
216	XLOC_013933	NAAT1	X:5299264-5304878	wild-type	V72G	OK	1.99729	7.15501	1.84091	-3.93721	8.24353e-05	0.00537233	yes
217	XLOC_005656	Mmp1	2R:20556900-20575695	wild-type	V72G	OK	76.7461	194.874	1.34437	-3.93076	8.46788e-05	0.00548322	yes
218	XLOC_007606	Cralbp	3L:5773144-5779741	wild-type	V72G	OK	49.9933	19.292	-1.37373	3.92615	8.63176e-05	0.00555886	yes
219	XLOC_007244	CG32457	3L:22980741-22981362	wild-type	V72G	OK	16.9424	3.03663	-2.48009	3.9225	8.76344e-05	0.00561812	yes
220	XLOC_010712	Mst84Dd	3R:3189016-3189495	wild-type	V72G	OK	54.7505	141.688	1.37178	-3.92158	8.79687e-05	0.00563445	yes
221	XLOC_006857	CG13069	3L:16258490-16258868	wild-type	V72G	OK	84.5068	30.8639	-1.45315	3.91734	8.95313e-05	0.00571902	yes
222	XLOC_003777	CG9975	2R:15229313-15233067	wild-type	V72G	OK	21.4372	45.0314	1.07082	-3.91564	9.0163e-05	0.00575419	yes
223	XLOC_012075	ocn	3R:25862716-25863452	wild-type	V72G	OK	92.5771	200.728	1.11652	-3.90832	9.29389e-05	0.00589945	yes
224	XLOC_009835	TotA	3R:16696757-16697427	wild-type	V72G	OK	2686.97	6377.43	1.247	-3.90376	9.47098e-05	0.0059697	yes
225	XLOC_012379	yellow-h	4:248549-251054	wild-type	V72G	OK	47.0513	20.551	-1.19502	3.89965	9.63332e-05	0.00604986	yes
226	XLOC_010182	CG14540	3R:21785197-21787163	wild-type	V72G	OK	20.1158	43.936	1.12707	-3.89894	9.66149e-05	0.00606218	yes
227	XLOC_002432	CG17567	2L:19183090-19183613	wild-type	V72G	OK	102.157	251.305	1.29865	-3.89849	9.67959e-05	0.00606816	yes
228	XLOC_003882	CG34396	2R:16979739-16988961	wild-type	V72G	OK	11.0551	35.7357	1.69266	-3.88246	0.000103404	0.00641431	yes
229	XLOC_001682	CG7251	2L:5587142-5588414	wild-type	V72G	OK	9.66923	26.0377	1.42913	-3.88154	0.000103798	0.00642752	yes
230	XLOC_011029	CG14740	3R:7886791-7888666	wild-type	V72G	OK	10.8715	27.0018	1.3125	-3.86374	0.000111662	0.00680736	yes
231	XLOC_003328	Mp20	2R:9134156-9135278	wild-type	V72G	OK	183.23	83.7085	-1.13021	3.86228	0.000112334	0.00683652	yes
232	XLOC_001053	CG5790	2L:18294903-18297277	wild-type	V72G	OK	10.1072	23.4434	1.2138	-3.86152	0.000112684	0.00684287	yes
233	XLOC_006948	CG7510	3L:17614925-17623791	wild-type	V72G	OK	7.37842	17.0726	1.2103	-3.86152	0.000112686	0.00684287	yes
234	XLOC_007763	CG13674	3L:8211538-8212083	wild-type	V72G	OK	36.1468	10.5017	-1.78325	3.85715	0.000114718	0.00693993	yes
235	XLOC_011034	CG4810	3R:8018424-8020733	wild-type	V72G	OK	5.39692	14.112	1.38671	-3.85221	0.000117057	0.00703934	yes
236	XLOC_013144	Vago	X:10983322-10984138	wild-type	V72G	OK	30.7696	77.6309	1.33512	-3.85095	0.000117663	0.00706376	yes
237	XLOC_013796	Cyp4d1	X:2053174-2056160	wild-type	V72G	OK	21.6776	8.78882	-1.30246	3.8492	0.000118503	0.00709616	yes
238	XLOC_012639	CG3777	X:173735-364670	wild-type	V72G	OK	216.216	79.8665	-1.43681	3.84266	0.000121709	0.00725349	yes
239	XLOC_013220	Lsp1alpha	X:12384336-12387034	wild-type	V72G	OK	798.778	310.616	-1.36266	3.84259	0.000121745	0.00725349	yes
240	XLOC_000759	l(2)01810	2L:12027439-12034123	wild-type	V72G	OK	167.189	81.686	-1.03332	3.83311	0.000126534	0.00749472	yes
241	XLOC_004665	CG13183	2R:7791827-7800280	wild-type	V72G	OK	31.327	14.9958	-1.06285	3.83161	0.000127305	0.00752964	yes
242	XLOC_008012	CG10657	3L:12484924-12490298	wild-type	V72G	OK	158.227	77.8307	-1.02359	3.82998	0.000128155	0.0075654	yes
243	XLOC_010789	CG11741	3R:4354141-4354599	wild-type	V72G	OK	13.2299	1.17026	-3.49891	3.82184	0.000132462	0.0077515	yes
244	XLOC_007705	CG8564	3L:7378747-7380499	wild-type	V72G	OK	20.5459	45.0957	1.13414	-3.82145	0.000132671	0.00775446	yes
245	XLOC_014168	Idgf4	X:9822298-9825012	wild-type	V72G	OK	190.406	92.7867	-1.03709	3.81978	0.000133572	0.00778788	yes
246	XLOC_009011	Ccp84Ag	3R:2512449-2513762	wild-type	V72G	OK	14.1811	4.51081	-1.65251	3.81418	0.000136637	0.0079339	yes
247	XLOC_011692	CG10252	3R:19520935-19522000	wild-type	V72G	OK	76.3732	160.055	1.06743	-3.81146	0.000138146	0.00799533	yes
248	XLOC_008157	Eig71Ec	3L:15644571-15645351	wild-type	V72G	OK	832	403.553	-1.04382	3.81064	0.000138607	0.00801543	yes
249	XLOC_001569	CG3213	2L:3517272-3519697	wild-type	V72G	OK	29.5655	60.7688	1.03942	-3.80826	0.00013995	0.0080865	yes
250	XLOC_002903	CG11125	2R:3333693-3339056	wild-type	V72G	OK	12.1948	28.9139	1.24549	-3.8074	0.000140434	0.00810787	yes
251	XLOC_006200	CG11353	3L:4533171-4539281	wild-type	V72G	OK	12.0453	4.42952	-1.44325	3.80378	0.000142505	0.00820857	yes
252	XLOC_000800	CG5075	2L:12978785-12981301	wild-type	V72G	OK	7.22912	17.4936	1.27493	-3.80186	0.000143612	0.00826439	yes
253	XLOC_008073	CG8745	3L:13839153-13859985	wild-type	V72G	OK	14.7594	33.8618	1.19803	-3.79366	0.000148445	0.00851487	yes
254	XLOC_013940	CG34434	X:5508586-5510403	wild-type	V72G	OK	17.1552	38.9885	1.1844	-3.78808	0.000151817	0.00866622	yes
255	XLOC_008319	Tsp74F	3L:17884919-17888954	wild-type	V72G	OK	27.856	9.86294	-1.4979	3.78808	0.000151818	0.00866622	yes
256	XLOC_004242	scarface	2R:1564253-1579215	wild-type	V72G	OK	44.385	99.1557	1.15963	-3.78464	0.000153932	0.00874463	yes
257	XLOC_001931	CG31709,gcm	2L:9578535-9581742	wild-type	V72G	OK	49.9256	107.933	1.11229	-3.78312	0.000154877	0.00879126	yes
258	XLOC_007820	UGP	3L:9342710-9352031	wild-type	V72G	OK	44.6928	18.9576	-1.23726	3.77912	0.000157384	0.00891924	yes
259	XLOC_008213	CG13041	3L:16312051-16312620	wild-type	V72G	OK	43.6045	14.906	-1.54858	3.77611	0.000159295	0.00900593	yes
260	XLOC_004041	CG3085	2R:18962591-18966559	wild-type	V72G	OK	14.1919	33.6799	1.24683	-3.77456	0.000160293	0.00904075	yes
261	XLOC_005336	exu	2R:16554923-16558379	wild-type	V72G	OK	53.6376	113.779	1.08491	-3.7737	0.000160843	0.00905734	yes
262	XLOC_003946	CG9284	2R:17690928-17691846	wild-type	V72G	OK	84.2095	176.013	1.06362	-3.77306	0.000161258	0.00906873	yes
263	XLOC_002324	CG13282	2L:16832064-16834486	wild-type	V72G	OK	74.5083	36.3062	-1.03718	3.76832	0.000164352	0.00920359	yes
264	XLOC_004052	CG9861	2R:19211181-19215104	wild-type	V72G	OK	9.63971	21.5453	1.16031	-3.76812	0.00016448	0.00920359	yes
265	XLOC_009406	Hsc70-2	3R:8870480-8873112	wild-type	V72G	OK	13.4303	29.7274	1.1463	-3.76527	0.000166366	0.00928713	yes
266	XLOC_005973	CG9129	3L:1250695-1251782	wild-type	V72G	OK	22.1392	51.3945	1.21501	-3.75817	0.000171162	0.00949507	yes
267	XLOC_004675	CG30039	2R:7938479-7939260	wild-type	V72G	OK	32.7712	75.7446	1.20872	-3.75663	0.000172219	0.00954613	yes
268	XLOC_011680	CG10175	3R:19348422-19356704	wild-type	V72G	OK	39.9378	18.2033	-1.13356	3.75376	0.000174202	0.00962594	yes
269	XLOC_000878	nimC4	2L:14039842-14089726	wild-type	V72G	OK	143.724	70.3321	-1.03104	3.75011	0.000176757	0.00972921	yes
270	XLOC_003293	CG8646	2R:8543460-8546985	wild-type	V72G	OK	10.5677	3.43746	-1.62025	3.74707	0.000178911	0.00984011	yes
271	XLOC_001831	TwdlE	2L:7857956-7860838	wild-type	V72G	OK	703.565	325.621	-1.11149	3.7453	0.000180177	0.00988672	yes
272	XLOC_009668	CG43175	3R:13470186-13470970	wild-type	V72G	OK	1.33603	14.3372	3.42373	-3.74457	0.000180706	0.00990041	yes
273	XLOC_011338	CG34053	3R:13230197-13232233	wild-type	V72G	OK	29.9317	10.554	-1.50389	3.74419	0.000180974	0.0099074	yes
274	XLOC_012347	intergenic	3R:26718252-26718979	wild-type	V72G	OK	0	2.95227	1.79769e+308	1.79769e+308	0.000185205	0.0100767	yes
275	XLOC_003869	Act57B	2R:16831532-16833945	wild-type	V72G	OK	188.286	92.6338	-1.02332	3.73735	0.00018597	0.0101106	yes
276	XLOC_012126	CG2267	3R:26452961-26454750	wild-type	V72G	OK	15.6599	34.6838	1.14718	-3.73424	0.000188283	0.0101851	yes
277	XLOC_002613	CG2528	2L:21981571-21992933	wild-type	V72G	OK	5.48806	14.2056	1.37209	-3.73415	0.000188348	0.0101851	yes
278	XLOC_004046	Klp59D	2R:19029521-19032022	wild-type	V72G	OK	11.6286	25.2722	1.11987	-3.72964	0.000191757	0.0103065	yes
279	XLOC_001637	hoe2	2L:4933046-4936582	wild-type	V72G	OK	4.95582	1.2309	-2.00942	3.72925	0.000192051	0.0103145	yes
280	XLOC_007728	CG32371	3L:7756369-7768703	wild-type	V72G	OK	29.6628	66.5209	1.16515	-3.72752	0.000193371	0.0103758	yes
281	XLOC_009271	CG4706	3R:6962898-6965467	wild-type	V72G	OK	7.96629	18.4787	1.21388	-3.72015	0.000199102	0.0106048	yes
282	XLOC_002374	CG31788	2L:18257492-18257892	wild-type	V72G	OK	76.8743	188.062	1.29064	-3.71952	0.000199603	0.0106235	yes
283	XLOC_010480	gskt	3R:27198148-27199920	wild-type	V72G	OK	10.8916	25.2061	1.21056	-3.71489	0.000203291	0.0107874	yes
284	XLOC_005135	Jheh2	2R:14743271-14745443	wild-type	V72G	OK	45.9289	22.3664	-1.03807	3.71408	0.000203948	0.010813	yes
285	XLOC_002890	Spn43Aa	2R:3035202-3036757	wild-type	V72G	OK	428.036	208.194	-1.0398	3.71371	0.000204246	0.010813	yes
286	XLOC_006929	CG7707	3L:17236535-17237854	wild-type	V72G	OK	6.66244	19.5109	1.55016	-3.71274	0.000205025	0.0108388	yes
287	XLOC_006481	CG3222	3L:9592087-9593441	wild-type	V72G	OK	12.6465	30.3266	1.26185	-3.70583	0.000210699	0.0111221	yes
288	XLOC_001100	CG17344	2L:19079233-19108108	wild-type	V72G	OK	24.5864	62.7715	1.35225	-3.70266	0.000213347	0.0112284	yes
289	XLOC_007799	CG32023	3L:8796701-8797282	wild-type	V72G	OK	2.37229	16.0043	2.75411	-3.70001	0.000215592	0.0113126	yes
290	XLOC_004092	CG5539	2R:19691837-19693772	wild-type	V72G	OK	12.415	32.0391	1.36775	-3.69482	0.000220045	0.0114746	yes
291	XLOC_005531	CG3502	2R:19230927-19235300	wild-type	V72G	OK	17.4217	7.87234	-1.14602	3.6929	0.000221713	0.0115317	yes
292	XLOC_009793	CG4836	3R:15839593-15843976	wild-type	V72G	OK	33.8911	72.5738	1.09854	-3.69141	0.000223015	0.0115754	yes
293	XLOC_000274	CG11929	2L:4682630-4687235	wild-type	V72G	OK	7.55528	16.8519	1.15736	-3.6903	0.000223994	0.0116106	yes
294	XLOC_014074	CG2254	X:7972381-7975635	wild-type	V72G	OK	8.28062	2.51993	-1.71635	3.68712	0.000226804	0.0117105	yes
295	XLOC_010713	Mst84Dc	3R:3189974-3190395	wild-type	V72G	OK	98.3931	234.489	1.25289	-3.68638	0.000227464	0.0117275	yes
296	XLOC_014348	CG11816	X:13446650-13448355	wild-type	V72G	OK	568.425	249.411	-1.18845	3.67974	0.000233473	0.0120003	yes
297	XLOC_000694	CG17127	2L:10770866-10771370	wild-type	V72G	OK	1025.89	507.564	-1.01522	3.67912	0.000234044	0.0120143	yes
298	XLOC_004542	sut4	2R:5972944-5974632	wild-type	V72G	OK	13.9702	35.4791	1.34462	-3.67743	0.000235594	0.0120634	yes
299	XLOC_007676	CG32388	3L:6976571-6977672	wild-type	V72G	OK	24.3015	54.019	1.15242	-3.64905	0.000263208	0.0132104	yes
300	XLOC_013733	CG3699	X:840685-841517	wild-type	V72G	OK	98.1768	48.4734	-1.01819	3.6431	0.000269377	0.0134102	yes
301	XLOC_009022	djl	3R:2886488-2887641	wild-type	V72G	OK	15.781	36.7108	1.21802	-3.64346	0.000269001	0.0134102	yes
302	XLOC_010869	CG9427	3R:5450874-5452187	wild-type	V72G	OK	71.4959	34.5576	-1.04886	3.63543	0.00027752	0.0137865	yes
303	XLOC_003968	CG11275	2R:18064945-18070337	wild-type	V72G	OK	9.88558	3.22959	-1.61397	3.63243	0.000280765	0.0138989	yes
304	XLOC_005002	CG9010	2R:12846447-12847652	wild-type	V72G	OK	13.2301	31.8482	1.26738	-3.63095	0.000282385	0.0139402	yes
305	XLOC_008210	CG13044	3L:16295590-16296260	wild-type	V72G	OK	25.9929	8.31399	-1.64451	3.62825	0.000285351	0.0140572	yes
306	XLOC_009917	CG31169	3R:18207057-18214194	wild-type	V72G	OK	9.5376	19.371	1.0222	-3.62242	0.000291857	0.0143378	yes
307	XLOC_011237	CG6125	3R:11228525-11232789	wild-type	V72G	OK	11.2191	3.60552	-1.63767	3.62094	0.000293536	0.0143817	yes
308	XLOC_010452	CG1340	3R:26551808-26553719	wild-type	V72G	OK	9.60328	22.2556	1.21257	-3.61974	0.000294899	0.0144272	yes
309	XLOC_011163	CG31327	3R:9983281-9985904	wild-type	V72G	OK	4.86749	12.0189	1.30405	-3.61841	0.000296422	0.0144917	yes
310	XLOC_012018	CG31445	3R:25066300-25070387	wild-type	V72G	OK	3.25143	8.64314	1.41048	-3.61812	0.000296756	0.0144981	yes
311	XLOC_001041	CG31740,CG42634	2L:18007934-18011475	wild-type	V72G	OK	82.3954	176.116	1.09589	-3.61491	0.000300448	0.0146381	yes
312	XLOC_001221	CG34136	2L:21094960-21102392	wild-type	V72G	OK	186.014	86.986	-1.09655	3.61467	0.00030073	0.0146417	yes
313	XLOC_008530	CG7202	3L:21484547-21485873	wild-type	V72G	OK	11.2335	29.3986	1.38794	-3.6115	0.000304432	0.0147808	yes
314	XLOC_007500	CG11594	3L:4021438-4026009	wild-type	V72G	OK	17.1869	6.68694	-1.36189	3.6037	0.000313714	0.0151078	yes
315	XLOC_001159	CG12617	2L:20294706-20295320	wild-type	V72G	OK	22.7471	61.948	1.44537	-3.60183	0.000315991	0.0151967	yes
316	XLOC_003132	CG12309	2R:6608832-6616695	wild-type	V72G	OK	21.985	48.6761	1.14669	-3.5993	0.000319073	0.0153034	yes
317	XLOC_002338	CG6380	2L:17291133-17292202	wild-type	V72G	OK	12.9413	31.222	1.27058	-3.59908	0.00031934	0.0153058	yes
318	XLOC_013988	CG15891	X:6185382-6189148	wild-type	V72G	OK	12.4317	30.8849	1.31288	-3.59884	0.000319641	0.0153099	yes
319	XLOC_006354	eIF4E-5	3L:7887979-7889114	wild-type	V72G	OK	21.3549	47.9708	1.16759	-3.59091	0.000329528	0.015688	yes
320	XLOC_000152	CG15395	2L:2610145-2611285	wild-type	V72G	OK	1.08843	6.02903	2.46968	-3.58912	0.000331801	0.0157645	yes
321	XLOC_011817	CG10514	3R:21104145-21105541	wild-type	V72G	OK	5.83564	1.43534	-2.0235	3.58525	0.000336756	0.0159255	yes
322	XLOC_003230	CG33964,Cyp6g1	2R:8070090-8077882	wild-type	V72G	OK	18.2667	6.54563	-1.48061	3.58537	0.000336595	0.0159255	yes
323	XLOC_014277	CR32661	X:11811838-11812711	wild-type	V72G	OK	22.4334	54.6335	1.28414	-3.58518	0.000336841	0.0159255	yes
324	XLOC_011931	CG5987	3R:23073948-23076729	wild-type	V72G	OK	11.022	23.4992	1.09222	-3.58488	0.000337237	0.0159266	yes
325	XLOC_006864	CG13063	3L:16299746-16300198	wild-type	V72G	OK	23.5993	4.811	-2.29433	3.58451	0.000337716	0.015928	yes
326	XLOC_014761	CG1324	X:20605770-20606987	wild-type	V72G	OK	14.616	34.1995	1.22643	-3.58304	0.000339613	0.0159961	yes
327	XLOC_004474	CG8193	2R:4929764-4932213	wild-type	V72G	OK	1.22514	4.91626	2.00461	-3.58153	0.000341582	0.0160627	yes
328	XLOC_007446	Cht7	3L:3090984-3106956	wild-type	V72G	OK	53.2752	27.2805	-0.965595	3.58127	0.000341933	0.0160627	yes
329	XLOC_008413	serp	3L:19694076-19701109	wild-type	V72G	OK	423.349	195.665	-1.11346	3.5814	0.000341763	0.0160627	yes
330	XLOC_005515	Klp59C	2R:19011516-19013565	wild-type	V72G	OK	7.8221	18.093	1.2098	-3.58109	0.00034217	0.0160632	yes
331	XLOC_011180	soti	3R:10206104-10207421	wild-type	V72G	OK	27.0115	62.6814	1.21446	-3.57195	0.000354327	0.016579	yes
332	XLOC_008165	comm2	3L:15690690-15692949	wild-type	V72G	OK	44.7297	22.507	-0.990859	3.57137	0.000355117	0.016605	yes
333	XLOC_007146	CG32437	3L:21350782-21352967	wild-type	V72G	OK	7.94193	18.2536	1.20062	-3.56962	0.000357504	0.0166953	yes
334	XLOC_002334	CG6304	2L:17011503-17014690	wild-type	V72G	OK	18.5705	43.1728	1.21711	-3.56592	0.000362582	0.0168871	yes
335	XLOC_010343	CG11842	3R:24878401-24879635	wild-type	V72G	OK	4.30167	0	-1.79769e+308	-1.79769e+308	0.000364358	0.0169476	yes
336	XLOC_011159	CG14355	3R:9974229-9977721	wild-type	V72G	OK	9.9746	20.6946	1.05292	-3.56225	0.000367696	0.0170804	yes
337	XLOC_007935	CG6140	3L:11456664-11458407	wild-type	V72G	OK	7.90997	19.2982	1.28672	-3.55764	0.000374204	0.0173599	yes
338	XLOC_006826	CG17032	3L:15951942-15953709	wild-type	V72G	OK	21.3165	9.66235	-1.14153	3.55684	0.000375339	0.0174012	yes
339	XLOC_001996	CG5390	2L:10304062-10306594	wild-type	V72G	OK	214.166	110.781	-0.951017	3.55158	0.000382932	0.0176838	yes
340	XLOC_002041	Porin2	2L:10845782-10847044	wild-type	V72G	OK	21.1667	45.7581	1.11223	-3.55187	0.000382501	0.0176838	yes
341	XLOC_006376	eIF4E-3	3L:8222332-8223668	wild-type	V72G	OK	34.2113	72.0966	1.07546	-3.54974	0.000385611	0.0177496	yes
342	XLOC_004760	CG34312	2R:9094260-9099680	wild-type	V72G	OK	7.68297	23.3103	1.60123	-3.54898	0.000386728	0.0177895	yes
343	XLOC_009644	CG17283,CG5860	3R:13232289-13236489	wild-type	V72G	OK	11.1889	5.37683	-1.05723	3.54832	0.000387692	0.0178107	yes
344	XLOC_010139	CG11892	3R:21107269-21108964	wild-type	V72G	OK	27.6101	11.9224	-1.21152	3.54577	0.000391468	0.0179355	yes
345	XLOC_000377	CG13991	2L:6139460-6145011	wild-type	V72G	OK	3.81423	8.27814	1.11791	-3.5447	0.000393063	0.0179758	yes
346	XLOC_000082	CG5397	2L:1240037-1242205	wild-type	V72G	OK	18.551	8.76642	-1.08144	3.543	0.000395601	0.0180686	yes
347	XLOC_001740	mmy	2L:6468537-6473919	wild-type	V72G	OK	216.352	102.13	-1.08298	3.53754	0.00040388	0.0184111	yes
348	XLOC_010304	Mst98Cb	3R:24118524-24119589	wild-type	V72G	OK	16.1971	37.8659	1.22516	-3.53627	0.000405824	0.0184574	yes
349	XLOC_008878	CG31528	3R:242152-243389	wild-type	V72G	OK	9.6907	23.7946	1.29596	-3.5318	0.000412748	0.0186712	yes
350	XLOC_005156	CG9416	2R:15251149-15260747	wild-type	V72G	OK	40.2783	20.9313	-0.944337	3.53147	0.000413251	0.018682	yes
351	XLOC_007672	CG10064	3L:6958359-6961061	wild-type	V72G	OK	7.35565	16.7374	1.18615	-3.53061	0.000414597	0.0187103	yes
352	XLOC_006117	dro2	3L:3314348-3314682	wild-type	V72G	OK	668.164	1298.19	0.958226	-3.53087	0.000414196	0.0187103	yes
353	XLOC_006363	fan	3L:8102268-8103148	wild-type	V72G	OK	24.6685	54.4644	1.14265	-3.52913	0.000416931	0.0188004	yes
354	XLOC_001409	CG15824	2L:877292-885052	wild-type	V72G	OK	2.43051	5.73878	1.23949	-3.52586	0.000422106	0.0189854	yes
355	XLOC_011158	intergenic	3R:9958242-9958984	wild-type	V72G	OK	6.19685	0.384623	-4.01002	3.52542	0.000422807	0.0189928	yes
356	XLOC_009955	Tpl94D	3R:18792022-18793183	wild-type	V72G	OK	16.0185	36.7879	1.19949	-3.52544	0.000422775	0.0189928	yes
357	XLOC_004724	CG8785	2R:8528194-8535718	wild-type	V72G	OK	69.9844	35.9756	-0.960014	3.52304	0.000426619	0.0191519	yes
358	XLOC_004896	CG8157	2R:11213337-11213888	wild-type	V72G	OK	11.4912	1.61344	-2.83231	3.52269	0.000427184	0.0191651	yes
359	XLOC_004778	CG4744	2R:9281209-9286873	wild-type	V72G	OK	6.09165	13.9456	1.1949	-3.52237	0.000427708	0.0191765	yes
360	XLOC_002435	CG17564	2L:19298344-19299851	wild-type	V72G	OK	7.98394	20.2616	1.34358	-3.51287	0.000443291	0.0197006	yes
361	XLOC_012881	CG4151	X:5395864-5396608	wild-type	V72G	OK	1957.85	911.12	-1.10356	3.51201	0.000444739	0.0197361	yes
362	XLOC_001699	CG9016	2L:5922903-5923646	wild-type	V72G	OK	59.0927	121.626	1.0414	-3.51189	0.000444925	0.0197361	yes
363	XLOC_014299	CG32652	X:12305051-12306220	wild-type	V72G	OK	51.6232	125.101	1.277	-3.51117	0.000446137	0.0197527	yes
364	XLOC_001770	CG17376	2L:6799945-6800834	wild-type	V72G	OK	133.168	317.363	1.25288	-3.50974	0.000448551	0.0198224	yes
365	XLOC_013696	CG17707	X:36905-45382	wild-type	V72G	OK	16.0085	5.35909	-1.57878	3.50759	0.000452179	0.0199703	yes
366	XLOC_006957	CG7441	3L:17842794-17845554	wild-type	V72G	OK	17.0073	34.2438	1.00969	-3.50328	0.000459567	0.0202713	yes
367	XLOC_004549	CG12209	2R:6128373-6134977	wild-type	V72G	OK	5.20007	16.3597	1.65355	-3.50054	0.000464315	0.0204241	yes
368	XLOC_003235	CG13168	2R:8141496-8143197	wild-type	V72G	OK	17.131	36.6276	1.09632	-3.50045	0.000464473	0.0204241	yes
369	XLOC_000957	BicC	2L:16042031-16048626	wild-type	V72G	OK	3.51949	8.77481	1.318	-3.49027	0.000482524	0.021072	yes
370	XLOC_005974	CG9130,CG9133	3L:1252011-1255988	wild-type	V72G	OK	39.2846	87.8101	1.16042	-3.48866	0.000485456	0.0211629	yes
371	XLOC_000804	CG5122	2L:13130612-13134805	wild-type	V72G	OK	3.09508	7.3084	1.23958	-3.48785	0.000486919	0.021206	yes
372	XLOC_011940	CG3330	3R:23155406-23156604	wild-type	V72G	OK	17.1238	37.1392	1.11694	-3.48236	0.000497021	0.0215873	yes
373	XLOC_010907	CG12811	3R:5871297-5874562	wild-type	V72G	OK	122.43	53.1879	-1.20279	3.48081	0.000499907	0.0216861	yes
374	XLOC_010933	CG14688	3R:6503489-6506499	wild-type	V72G	OK	123.055	59.5066	-1.04818	3.48031	0.000500825	0.0216994	yes
375	XLOC_004162	Crtp	2R:20382040-20384550	wild-type	V72G	OK	5.20253	12.1143	1.21942	-3.47563	0.000509646	0.0220411	yes
376	XLOC_002020	Fatp	2L:10511251-10517216	wild-type	V72G	OK	33.1427	16.329	-1.02126	3.47461	0.000511605	0.0221123	yes
377	XLOC_007752	CG13676	3L:8130913-8144973	wild-type	V72G	OK	85.2486	41.9012	-1.02468	3.47298	0.000514723	0.02222	yes
378	XLOC_013212	CG2750	X:12001232-12007390	wild-type	V72G	OK	5.09616	10.5583	1.05089	-3.4703	0.000519879	0.022339	yes
379	XLOC_012423	CG31997	4:175334-176714	wild-type	V72G	OK	364.043	189.876	-0.939051	3.47027	0.000519942	0.022339	yes
380	XLOC_013211	CR32658	X:11985296-11986302	wild-type	V72G	OK	46.7508	105.754	1.17765	-3.46864	0.000523102	0.0224125	yes
381	XLOC_007668	Prat2	3L:6905092-6907958	wild-type	V72G	OK	18.037	37.6799	1.06284	-3.46719	0.000525926	0.0224844	yes
382	XLOC_009341	CG10014	3R:8047991-8050741	wild-type	V72G	OK	6.99714	17.7183	1.34041	-3.465	0.000530223	0.0226271	yes
383	XLOC_005119	CG15086	2R:14566156-14574320	wild-type	V72G	OK	5.38684	11.7269	1.12231	-3.46436	0.000531499	0.0226679	yes
384	XLOC_002070	Ca-beta,Vm32E	2L:11156035-11173722	wild-type	V72G	OK	2.34329	7.65282	1.70746	-3.46361	0.000532981	0.0227038	yes
385	XLOC_001201	dia	2L:20758146-20767575	wild-type	V72G	OK	29.0246	14.3174	-1.0195	3.46176	0.000536653	0.0228053	yes
386	XLOC_004420	CG30376	2R:4151117-4151931	wild-type	V72G	OK	20.9974	47.4299	1.17559	-3.45942	0.000541341	0.022977	yes
387	XLOC_013155	CG15200	X:11076963-11077520	wild-type	V72G	OK	20.2274	52.6278	1.37952	-3.4592	0.000541773	0.0229816	yes
388	XLOC_012346	intergenic	3R:26715633-26716492	wild-type	V72G	OK	0	1.92883	1.79769e+308	1.79769e+308	0.00055235	0.0232497	yes
389	XLOC_011694	CG31468	3R:19525542-19526076	wild-type	V72G	OK	82.6919	172.979	1.06478	-3.45276	0.000554882	0.0233142	yes
390	XLOC_004634	CG9027	2R:7267848-7271613	wild-type	V72G	OK	126.375	62.2975	-1.02047	3.4496	0.000561409	0.023491	yes
391	XLOC_002204	nimC3	2L:14004770-14020446	wild-type	V72G	OK	37.0642	17.6814	-1.0678	3.4403	0.000581078	0.0241287	yes
392	XLOC_007719	CG7716	3L:7581831-7584098	wild-type	V72G	OK	6.87833	15.852	1.20454	-3.44001	0.000581693	0.024129	yes
393	XLOC_010665	CG15177	3R:2453921-2455043	wild-type	V72G	OK	16.9131	38.9939	1.20511	-3.43804	0.000585943	0.0242738	yes
394	XLOC_010990	CG6790	3R:7394971-7404467	wild-type	V72G	OK	11.6198	27.5864	1.24738	-3.43567	0.0005911	0.0243451	yes
395	XLOC_001725	CG31639	2L:6153839-6155088	wild-type	V72G	OK	45.0908	104.304	1.20989	-3.43116	0.000601015	0.0245819	yes
396	XLOC_005321	l(2)05510	2R:16450539-16469633	wild-type	V72G	OK	57.3785	30.3025	-0.921072	3.42274	0.000619937	0.0252248	yes
397	XLOC_000929	CG4161	2L:15433361-15435250	wild-type	V72G	OK	3.77124	10.465	1.47247	-3.42006	0.000626081	0.025431	yes
398	XLOC_010310	Dhc98D	3R:24312669-24345120	wild-type	V72G	OK	2.29696	4.87649	1.08611	-3.41829	0.000630158	0.025538	yes
399	XLOC_013622	CG34331	X:20016489-20017094	wild-type	V72G	OK	11.8611	2.87296	-2.04562	3.41718	0.00063273	0.0255983	yes
400	XLOC_005296	CG43195, CG42690, CG42691	2R:15831669-15834345	wild-type	V72G	OK	2.77571	9.70294	1.80556	-3.41591	0.000635691	0.0256685	yes
401	XLOC_002505	CG17470	2L:20642305-20643244	wild-type	V72G	OK	25.4167	54.4121	1.09815	-3.41516	0.000637455	0.025716	yes
402	XLOC_000241	CG3964	2L:3862680-3867507	wild-type	V72G	OK	8.45805	17.4772	1.04707	-3.41491	0.00063803	0.0257246	yes
403	XLOC_008519	CG11309	3L:21294375-21297811	wild-type	V72G	OK	31.7233	13.6629	-1.21528	3.41239	0.00064395	0.0258602	yes
404	XLOC_014141	t	X:9111687-9117290	wild-type	V72G	OK	22.5417	11.0608	-1.02714	3.41087	0.000647562	0.0259611	yes
405	XLOC_011957	ALiX	3R:23522186-23525967	wild-type	V72G	OK	46.0843	86.2052	0.9035	-3.40896	0.00065212	0.0260995	yes
406	XLOC_007502	Dpy-30L2	3L:4046610-4059665	wild-type	V72G	OK	48.2672	109.911	1.18722	-3.40837	0.000653528	0.0261264	yes
407	XLOC_009892	CG17843	3R:17739470-17741268	wild-type	V72G	OK	4.63069	1.37361	-1.75325	3.40653	0.00065794	0.0262123	yes
408	XLOC_000930	Tim17b2	2L:15484767-15494204	wild-type	V72G	OK	15.5813	39.3129	1.33519	-3.4051	0.000661399	0.0262927	yes
409	XLOC_013137	CG15208	X:10794392-10795771	wild-type	V72G	OK	11.4634	26.3956	1.20326	-3.40399	0.000664102	0.0263558	yes
410	XLOC_009021	dj	3R:2885036-2886238	wild-type	V72G	OK	44.8173	94.6945	1.07923	-3.40031	0.000673086	0.0265931	yes
411	XLOC_001010	CG34313	2L:16879516-16886323	wild-type	V72G	OK	23.1734	11.7211	-0.983361	3.39634	0.000682928	0.0268891	yes
412	XLOC_009339	CG3809	3R:8023662-8025196	wild-type	V72G	OK	6.59595	16.8373	1.35201	-3.39568	0.000684589	0.0269125	yes
413	XLOC_002678	CR42850	2L:5379087-5381095	wild-type	V72G	OK	8.63647	19.071	1.14287	-3.39333	0.000690489	0.0270843	yes
414	XLOC_007582	CG10630	3L:5490622-5492058	wild-type	V72G	OK	13.1623	29.1616	1.14766	-3.3854	0.000710755	0.0276648	yes
415	XLOC_001498	CG18641,CG31948	2L:2400305-2416750	wild-type	V72G	OK	45.7423	97.6838	1.09459	-3.38379	0.000714924	0.0277965	yes
416	XLOC_009416	CG8630	3R:9105444-9110316	wild-type	V72G	OK	7.18476	2.8464	-1.3358	3.38179	0.000720154	0.0279538	yes
417	XLOC_013616	CG9570	X:19945326-19946555	wild-type	V72G	OK	8.11957	20.3771	1.32747	-3.3778	0.000730687	0.0282235	yes
418	XLOC_006671	CG14118	3L:12885812-12887596	wild-type	V72G	OK	172.334	92.2671	-0.901318	3.37629	0.000734691	0.0282473	yes
419	XLOC_009235	CG34107,CG34108	3R:6050471-6051904	wild-type	V72G	OK	27.9086	67.1462	1.26659	-3.3769	0.000733074	0.0282473	yes
420	XLOC_011442	CG5217	3R:15072773-15073867	wild-type	V72G	OK	18.9383	41.1216	1.11859	-3.37707	0.000732615	0.0282473	yes
421	XLOC_010715	MstProx	3R:3191571-3200327	wild-type	V72G	OK	2.34577	7.11007	1.5998	-3.37654	0.000734049	0.0282473	yes
422	XLOC_006610	CG11588	3L:11914665-11915551	wild-type	V72G	OK	17.0015	39.9185	1.2314	-3.37474	0.000738857	0.0283689	yes
423	XLOC_003529	Nox	2R:12196662-12209610	wild-type	V72G	OK	16.9873	7.98455	-1.08918	3.37363	0.00074184	0.0284372	yes
424	XLOC_001689	CG11147	2L:5724657-5762417	wild-type	V72G	OK	27.0954	13.2047	-1.037	3.37337	0.000742548	0.0284489	yes
425	XLOC_010934	CG31391	3R:6529089-6530797	wild-type	V72G	OK	9.89913	21.9826	1.15099	-3.3713	0.000748131	0.0285903	yes
426	XLOC_008138	CG7804	3L:15465296-15467210	wild-type	V72G	OK	14.6232	30.2356	1.04799	-3.37149	0.00074762	0.0285903	yes
427	XLOC_006860	CG13066	3L:16266031-16266972	wild-type	V72G	OK	8.23057	1.77582	-2.2125	3.36935	0.000753467	0.0287429	yes
428	XLOC_004769	CG4712	2R:9136398-9139214	wild-type	V72G	OK	7.43071	16.9226	1.18738	-3.36768	0.000758038	0.0289017	yes
429	XLOC_008552	CG14569	3L:21723823-21724647	wild-type	V72G	OK	37.2733	17.0328	-1.12983	3.36647	0.000761378	0.0289667	yes
430	XLOC_003533	CG6262	2R:12247234-12251029	wild-type	V72G	OK	10.9438	25.0254	1.19328	-3.36504	0.00076532	0.0290534	yes
431	XLOC_011752	CG5762	3R:20186426-20187411	wild-type	V72G	OK	28.2613	58.5008	1.04963	-3.3613	0.000775754	0.0292934	yes
432	XLOC_000357	Ucp4C	2L:5968596-5969761	wild-type	V72G	OK	4.69317	13.707	1.54628	-3.36093	0.000776815	0.0293022	yes
433	XLOC_012979	CG1999	X:7252828-7254101	wild-type	V72G	OK	13.6219	30.7582	1.17505	-3.35793	0.00078529	0.029559	yes
434	XLOC_008698	intergenic	3L:10369649-10371820	wild-type	V72G	OK	1.31247	0.0648283	-4.33952	3.35477	0.000794304	0.0298507	yes
435	XLOC_005098	CG43202	2R:14268910-14269354	wild-type	V72G	OK	0.670742	19.4907	4.86088	-3.35351	0.000797941	0.0299556	yes
436	XLOC_003602	CG10950	2R:13082707-13084669	wild-type	V72G	OK	6.76045	15.9802	1.24109	-3.34732	0.000815968	0.0304986	yes
437	XLOC_008260	CG6652	3L:17013439-17015956	wild-type	V72G	OK	14.4875	28.5253	0.977429	-3.34721	0.00081628	0.0304986	yes
438	XLOC_013814	Ilp6	X:2225438-2227719	wild-type	V72G	OK	63.5275	33.0011	-0.944867	3.34294	0.000828968	0.0308263	yes
439	XLOC_004983	Amyrel	2R:12538596-12540204	wild-type	V72G	OK	3.17693	0.671431	-2.24232	3.34021	0.000837161	0.0310841	yes
440	XLOC_004078	CG5428	2R:19569146-19570475	wild-type	V72G	OK	45.7811	23.4458	-0.965423	3.34019	0.000837217	0.0310841	yes
441	XLOC_004556	CG12902	2R:6209895-6282677	wild-type	V72G	OK	36.5458	89.3262	1.28938	-3.33916	0.000840322	0.0311614	yes
442	XLOC_006258	Jon65Aii	3L:6045449-6046291	wild-type	V72G	OK	3.33248	13.0226	1.96635	-3.33814	0.000843426	0.0312091	yes
443	XLOC_001040	CG42659	2L:18007334-18007843	wild-type	V72G	OK	18.2436	53.3946	1.54931	-3.33274	0.00085994	0.0317447	yes
444	XLOC_002376	CG31787	2L:18284935-18285684	wild-type	V72G	OK	8.26072	23.1205	1.48483	-3.33197	0.000862333	0.0317757	yes
445	XLOC_005295	CG13872	2R:15766332-15768425	wild-type	V72G	OK	3.89249	10.0007	1.36134	-3.33083	0.000865886	0.0318315	yes
446	XLOC_003769	CG7229	2R:15147418-15149744	wild-type	V72G	OK	7.60411	16.4045	1.10924	-3.32975	0.000869235	0.0319215	yes
447	XLOC_001241	dtr	2L:21361215-21367297	wild-type	V72G	OK	5.31378	10.811	1.02469	-3.32127	0.000896073	0.0327205	yes
448	XLOC_004863	CG10202	2R:10705364-10707492	wild-type	V72G	OK	3.20725	8.68035	1.43641	-3.31673	0.000910779	0.0331891	yes
449	XLOC_000254	CG15425	2L:4257571-4258425	wild-type	V72G	OK	13.0011	31.5523	1.27911	-3.31418	0.000919134	0.0334076	yes
450	XLOC_002080	Mst33A	2L:11581862-11626830	wild-type	V72G	OK	26.3885	61.8071	1.22786	-3.31385	0.000920215	0.0334298	yes
451	XLOC_010485	CG12063	3R:27324960-27332716	wild-type	V72G	OK	12.7649	24.6622	0.950119	-3.31345	0.000921529	0.0334603	yes
452	XLOC_002240	Mst35Ba	2L:14879044-14881652	wild-type	V72G	OK	22.2194	51.1265	1.20225	-3.31178	0.000927041	0.033626	yes
453	XLOC_009553	CG4546	3R:11670187-11679301	wild-type	V72G	OK	33.2659	74.3466	1.16022	-3.30949	0.000934653	0.0337983	yes
454	XLOC_001110	CG17349	2L:19370477-19372712	wild-type	V72G	OK	10.0304	24.048	1.26154	-3.30728	0.000942081	0.0340054	yes
455	XLOC_011283	CG10311	3R:12176571-12182733	wild-type	V72G	OK	29.8849	12.0091	-1.31529	3.30634	0.00094524	0.0340777	yes
456	XLOC_010290	CG5017	3R:23738168-23742249	wild-type	V72G	OK	34.4109	75.9075	1.14138	-3.30605	0.000946198	0.0340777	yes
457	XLOC_011678	Irk2	3R:19339633-19345264	wild-type	V72G	OK	11.5799	3.94623	-1.55308	3.30599	0.000946404	0.0340777	yes
458	XLOC_010356	CG14515	3R:25023304-25024933	wild-type	V72G	OK	0.78116	6.62702	3.08467	-3.30552	0.000948013	0.0341073	yes
459	XLOC_004759	lat	2R:9090247-9094027	wild-type	V72G	OK	7.76685	15.931	1.03644	-3.29987	0.000967288	0.0346775	yes
460	XLOC_000376	CG9222	2L:6131022-6132484	wild-type	V72G	OK	7.14336	17.9448	1.32889	-3.2974	0.000975857	0.0348436	yes
461	XLOC_009498	RpL10Aa	3R:10863087-10863872	wild-type	V72G	OK	12.3682	31.5768	1.35223	-3.29659	0.000978659	0.0349261	yes
462	XLOC_009930	CG7045	3R:18317494-18318108	wild-type	V72G	OK	42.8133	94.6618	1.14472	-3.29641	0.000979277	0.0349305	yes
463	XLOC_007058	schuy	3L:19979176-19982047	wild-type	V72G	OK	5.4415	12.6698	1.21932	-3.29283	0.000991855	0.0353224	yes
464	XLOC_002083	CG6614	2L:11645132-11648839	wild-type	V72G	OK	2.8549	6.95868	1.28537	-3.2925	0.000993007	0.0353313	yes
465	XLOC_003211	CG13188	2R:7826966-7856348	wild-type	V72G	OK	53.6207	24.7011	-1.11822	3.28672	0.00101363	0.0359567	yes
466	XLOC_002931	CG30377	2R:3777547-3803968	wild-type	V72G	OK	12.1291	5.41471	-1.16352	3.28489	0.00102022	0.0361183	yes
467	XLOC_008696	intergenic	3L:10365150-10366652	wild-type	V72G	OK	1.81543	0.101752	-4.15718	3.28229	0.00102967	0.0364164	yes
468	XLOC_006535	CG32068	3L:10656488-10657534	wild-type	V72G	OK	104.458	54.7948	-0.930809	3.28031	0.00103693	0.0365454	yes
469	XLOC_000685	CG17104	2L:10677039-10679696	wild-type	V72G	OK	28.7583	13.6093	-1.07939	3.27971	0.00103913	0.0366048	yes
470	XLOC_000735	CG4983	2L:11652447-11653847	wild-type	V72G	OK	13.2085	28.1792	1.09316	-3.27719	0.00104847	0.036842	yes
471	XLOC_012013	CG14508	3R:25028386-25029855	wild-type	V72G	OK	5.75105	15.1416	1.39662	-3.27255	0.00106582	0.0373332	yes
472	XLOC_014248	CG33235	X:11380801-11385556	wild-type	V72G	OK	3.89599	8.22066	1.07727	-3.27014	0.00107493	0.0375854	yes
473	XLOC_011364	Atg8b	3R:13550145-13550766	wild-type	V72G	OK	17.5621	42.8536	1.28695	-3.26531	0.00109345	0.0380638	yes
474	XLOC_011449	CG3517	3R:15238415-15286033	wild-type	V72G	OK	17.7287	37.5209	1.0816	-3.2648	0.00109543	0.0380955	yes
475	XLOC_008333	CG13700	3L:18291840-18294392	wild-type	V72G	OK	8.89572	21.9292	1.30167	-3.26441	0.00109693	0.0381289	yes
476	XLOC_000683	CG17098	2L:10651977-10654499	wild-type	V72G	OK	9.32142	19.5249	1.0667	-3.26331	0.00110118	0.0382577	yes
477	XLOC_009084	CG43060, CG43618, CG43061	3R:3865721-3881724	wild-type	V72G	OK	108.38	49.4902	-1.13089	3.26131	0.00110899	0.0384141	yes
478	XLOC_000884	CG15286	2L:14334159-14345802	wild-type	V72G	OK	11.2458	26.1308	1.21636	-3.25973	0.00111518	0.0385738	yes
479	XLOC_003442	CG12853	2R:10821029-10821431	wild-type	V72G	OK	50.2569	120.048	1.25622	-3.2585	0.00112002	0.0387223	yes
480	XLOC_000536	CG9314	2L:8687218-8709740	wild-type	V72G	OK	19.1341	45.5399	1.25099	-3.25588	0.00113043	0.0389872	yes
481	XLOC_006814	Eig71Ei	3L:15652806-15653312	wild-type	V72G	OK	202.471	103.604	-0.966643	3.25443	0.00113619	0.0391287	yes
482	XLOC_013864	CG16782	X:3353048-3354273	wild-type	V72G	OK	17.105	36.5147	1.09406	-3.24629	0.00116919	0.0400317	yes
483	XLOC_012974	CG1958	X:7160936-7161914	wild-type	V72G	OK	7.8892	20.3184	1.36484	-3.24656	0.00116807	0.0400317	yes
484	XLOC_006042	ACXD	3L:2237609-2243815	wild-type	V72G	OK	3.51323	1.29726	-1.43733	3.24393	0.00117892	0.0402867	yes
485	XLOC_011162	CG31533	3R:9980449-9983153	wild-type	V72G	OK	4.52387	10.3115	1.18862	-3.24278	0.00118371	0.040392	yes
486	XLOC_013406	CG8565	X:15731862-15735194	wild-type	V72G	OK	17.8834	37.3599	1.06287	-3.24226	0.00118587	0.0404463	yes
487	XLOC_013666	CG14579	X:21064279-21065548	wild-type	V72G	OK	9.38614	22.7459	1.277	-3.24191	0.00118733	0.0404767	yes
488	XLOC_002171	CG16957	2L:13395359-13396184	wild-type	V72G	OK	9.23125	24.4572	1.40566	-3.24062	0.00119269	0.0405676	yes
489	XLOC_009772	CG7432	3R:15490817-15496549	wild-type	V72G	OK	41.3499	22.4725	-0.879726	3.24053	0.00119308	0.0405676	yes
490	XLOC_002258	UK114	2L:15274229-15275060	wild-type	V72G	OK	127.089	65.9607	-0.946158	3.24016	0.00119461	0.040588	yes
491	XLOC_013099	CG32694	X:9883727-9900918	wild-type	V72G	OK	40.7623	17.2796	-1.23817	3.23844	0.00120186	0.0407563	yes
492	XLOC_005644	CG4681	2R:20465769-20467304	wild-type	V72G	OK	5.67342	13.8382	1.28637	-3.23621	0.00121127	0.0409969	yes
493	XLOC_010920	CG12814	3R:5996721-6015335	wild-type	V72G	OK	31.7054	15.8403	-1.00113	3.23534	0.001215	0.0410838	yes
494	XLOC_006868	CG13060	3L:16312960-16313567	wild-type	V72G	OK	12.6185	2.80888	-2.16747	3.23293	0.00122526	0.041407	yes
495	XLOC_002084	CG12307	2L:11651390-11652001	wild-type	V72G	OK	11.4605	30.8606	1.4291	-3.23102	0.00123351	0.0416104	yes
496	XLOC_002183	CG9014	2L:13722169-13723642	wild-type	V72G	OK	11.6869	25.5474	1.12828	-3.23015	0.00123727	0.0416977	yes
497	XLOC_001586	CG3604	2L:3697241-3697872	wild-type	V72G	OK	214.701	118.244	-0.860561	3.22862	0.00124391	0.0418415	yes
498	XLOC_000219	CG8851	2L:3520261-3522555	wild-type	V72G	OK	6.26507	13.4146	1.0984	-3.22811	0.00124609	0.0418753	yes
499	XLOC_005950	CG13889	3L:844267-851080	wild-type	V72G	OK	1.86989	4.11742	1.13878	-3.22687	0.0012515	0.0419774	yes
500	XLOC_007161	CG7634	3L:21558525-21560885	wild-type	V72G	OK	6.81121	15.1888	1.15703	-3.22246	0.00127096	0.0424893	yes
501	XLOC_006292	CG8368	3L:6596736-6601860	wild-type	V72G	OK	17.5219	33.5372	0.936601	-3.22086	0.00127805	0.0426859	yes
502	XLOC_002897	CG12164	2R:3198912-3200855	wild-type	V72G	OK	1644.14	744.383	-1.14321	3.2184	0.00128908	0.0429735	yes
503	XLOC_011807	CG34110	3R:20995285-21019498	wild-type	V72G	OK	3.72648	9.14259	1.29479	-3.21804	0.00129068	0.0430065	yes
504	XLOC_002510	Hr38	2L:20682362-20714818	wild-type	V72G	OK	1.19023	0.256059	-2.21669	3.21452	0.00130663	0.0434223	yes
505	XLOC_000641	CG4995	2L:10322475-10324993	wild-type	V72G	OK	10.6312	24.3443	1.19529	-3.21357	0.00131098	0.043519	yes
506	XLOC_000956	CG13245	2L:16000536-16041712	wild-type	V72G	OK	35.2785	89.2791	1.33953	-3.20818	0.00133577	0.0441765	yes
507	XLOC_004770	CG4714	2R:9139350-9141842	wild-type	V72G	OK	4.96746	10.9673	1.14262	-3.20818	0.00133577	0.0441765	yes
508	XLOC_012016	CG11951	3R:25061085-25063870	wild-type	V72G	OK	0.367025	1.95952	2.41655	-3.20597	0.00134609	0.044497	yes
509	XLOC_002243	mol	2L:14975746-14997556	wild-type	V72G	OK	15.1784	6.67969	-1.18417	3.20526	0.00134942	0.0445655	yes
510	XLOC_009317	I-t	3R:7529345-7530662	wild-type	V72G	OK	8.64708	19.7757	1.19345	-3.19979	0.00137528	0.0452928	yes
511	XLOC_010081	CG42331	3R:20601342-20610284	wild-type	V72G	OK	6.30045	12.4991	0.988304	-3.19609	0.00139304	0.04575	yes
512	XLOC_009411	CG8138	3R:9006397-9007825	wild-type	V72G	OK	3.97305	11.0766	1.4792	-3.19588	0.00139406	0.0457622	yes
513	XLOC_003523	CG33017	2R:12159816-12164840	wild-type	V72G	OK	2.47165	5.39195	1.12533	-3.19565	0.00139519	0.0457781	yes
514	XLOC_011494	CG4323	3R:16325709-16327739	wild-type	V72G	OK	13.7951	33.6622	1.28698	-3.19121	0.00141677	0.0463575	yes
515	XLOC_007239	slif	3L:22874145-22886929	wild-type	V72G	OK	45.8974	25.003	-0.876313	3.19079	0.00141885	0.0464043	yes
516	XLOC_002021	w-cup	2L:10544880-10628162	wild-type	V72G	OK	22.8887	52.6854	1.20277	-3.19062	0.0014197	0.0464106	yes
517	XLOC_003388	beta4GalNAcTA	2R:10146536-10148655	wild-type	V72G	OK	16.6523	8.12161	-1.03588	3.18783	0.00143343	0.0467731	yes
518	XLOC_013210	CR32657	X:11981243-11981728	wild-type	V72G	OK	65.2193	142.125	1.12379	-3.18493	0.00144791	0.0471152	yes
519	XLOC_014770	r-cup	X:20894416-20896915	wild-type	V72G	OK	2.48692	6.72657	1.43551	-3.18503	0.00144738	0.0471152	yes
520	XLOC_009939	CG31159,CG31161	3R:18439423-18444020	wild-type	V72G	OK	4.76965	12.9786	1.44418	-3.18419	0.00145161	0.047214	yes
521	XLOC_010664	sowi	3R:2452651-2453622	wild-type	V72G	OK	30.2942	61.5667	1.02311	-3.17118	0.00151821	0.0489086	yes
522	XLOC_004049	CG3092	2R:19120148-19121451	wild-type	V72G	OK	5.80722	14.539	1.324	-3.17077	0.00152037	0.048956	yes
523	XLOC_009748	CG14282	3R:15002721-15003708	wild-type	V72G	OK	4.80678	13.4756	1.4872	-3.16909	0.00152915	0.0491939	yes
524	XLOC_001216	CR33319	2L:20928823-20933700	wild-type	V72G	OK	11.4111	33.0947	1.53616	-3.16874	0.00153099	0.0492024	yes
525	XLOC_010209	Hex-t2	3R:22276373-22278049	wild-type	V72G	OK	7.88101	17.6799	1.16566	-3.16865	0.0015315	0.0492024	yes
526	XLOC_010167	CG5024	3R:21636817-21637497	wild-type	V72G	OK	12.7957	32.5161	1.3455	-3.16779	0.00153603	0.049298	yes
527	XLOC_010241	TwdlC	3R:22820557-22822164	wild-type	V72G	OK	9.7208	3.89995	-1.31762	3.16769	0.00153656	0.049298	yes
528	XLOC_003574	CG6472	2R:12760521-12783156	wild-type	V72G	OK	4.58752	0.894125	-2.35917	3.16446	0.0015537	0.0497354	yes
529	XLOC_012916	CG5928	X:5961992-5968890	wild-type	V72G	OK	30.5285	11.8385	-1.36667	3.16382	0.00155713	0.0498002	yes

## Sheet: Y107C_only
Supplemental Table S20: Unique mRNA expression changes in SmnY107C transgenic line.
	gene_id	gene	locus	sample_1	sample_2	status	value_1	value_2	log2(fold_change)	test_stat	p_value	q_value	significant
1	XLOC_012441	CG1909	4:592382-609976	wild-type	Y107C	OK	203541000	2613520000	3.6826	-7.76002	8.43769e-15	5.5345e-12	yes
2	XLOC_014612	CG43133	X:18023021-18024249	wild-type	Y107C	OK	51.8528	143.235	1.46589	-4.61974	3.84221e-06	0.00047298	yes
3	XLOC_003165	Cpr47Eb	2R:7142673-7143488	wild-type	Y107C	OK	14.3647	49.5813	1.78726	-4.46797	7.89652e-06	0.000829955	yes
4	XLOC_006170	CG1299	3L:4148696-4152477	wild-type	Y107C	OK	17.9214	48.0087	1.42161	-4.3231	1.53855e-05	0.0014455	yes
5	XLOC_013760	Nmdar2	X:1377743-1401842	wild-type	Y107C	OK	0.654083	5.71258	3.1266	-4.31694	1.58206e-05	0.00147271	yes
6	XLOC_012982	CG34337,CG9657	X:7310237-7315673	wild-type	Y107C	OK	0.151122	5.00127	5.04851	-3.94042	8.13398e-05	0.0053156	yes
7	XLOC_010143	CG11893	3R:21115610-21117088	wild-type	Y107C	OK	17.9495	43.3574	1.27233	-3.76711	0.000165148	0.0092337	yes
8	XLOC_007622	Jon65Ai	3L:6046683-6047526	wild-type	Y107C	OK	29.6192	8.74929	-1.75929	3.75299	0.000174739	0.00964059	yes
9	XLOC_007932	intergenic	3L:11400597-11403670	wild-type	Y107C	OK	0.0780005	1.62452	4.38039	-3.67734	0.000235682	0.0120634	yes
10	XLOC_008247	PGRP-SB1	3L:16720398-16721118	wild-type	Y107C	OK	32.221	82.917	1.36366	-3.53619	0.000405938	0.0184574	yes
11	XLOC_007842	path	3L:9487633-9498429	wild-type	Y107C	OK	22.3486	47.8145	1.09726	-3.51011	0.000447929	0.0198197	yes
12	XLOC_002230	CG31775	2L:14737096-14737766	wild-type	Y107C	OK	507.254	243.895	-1.05645	3.46617	0.000527934	0.0225566	yes
13	XLOC_012912	CG5966	X:5882844-5886677	wild-type	Y107C	OK	18.3655	38.0208	1.04979	-3.44665	0.000567578	0.0236791	yes
14	XLOC_001767	CG11321	2L:6759863-6773664	wild-type	Y107C	OK	4.54207	0.337297	-3.75126	3.4357	0.000591028	0.0243451	yes
15	XLOC_002997	PGRP-SC1a	2R:4597267-4597825	wild-type	Y107C	OK	1.67602	12.3833	2.88528	-3.43392	0.000594923	0.0244707	yes
16	XLOC_004605	CG9080	2R:7129249-7129700	wild-type	Y107C	OK	0.325801	16.0714	5.62436	-3.40749	0.000655626	0.0261659	yes
17	XLOC_006903	CG9701	3L:16726673-16732471	wild-type	Y107C	OK	26.8319	54.6304	1.02575	-3.37685	0.000733212	0.0282473	yes
18	XLOC_002231	CG42586	2L:14741167-14741837	wild-type	Y107C	OK	507.858	248.825	-1.02929	3.37444	0.000739674	0.0283695	yes
19	XLOC_005833	intergenic	2R:11284956-11286745	wild-type	Y107C	OK	0.127224	2.02497	3.99246	-3.32559	0.000882306	0.0323345	yes
20	XLOC_002894	Gadd45	2R:3136667-3138160	wild-type	Y107C	OK	24.9844	50.6149	1.01853	-3.29945	0.000968761	0.0347127	yes
21	XLOC_005829	intergenic	2R:11277662-11279772	wild-type	Y107C	OK	0.106285	1.60581	3.9173	-3.23872	0.00120066	0.0407349	yes
22	XLOC_008724	intergenic	3L:11404022-11405277	wild-type	Y107C	OK	0	2.48145	1.79769e+308	1.79769e+308	0.0012591	0.0421526	yes
23	XLOC_002652	CG43402	2L:1442411-1443399	wild-type	Y107C	OK	14.3356	4.45122	-1.68733	3.21287	0.00131417	0.0436044	yes

## Sheet: T205I_only
Supplemental Table S21: Unique mRNA expression changes in SmnT205I transgenic line.
	gene_id	gene	locus	sample_1	sample_2	status	value_1	value_2	log2(fold_change)	test_stat	p_value	q_value	significant
1	XLOC_001440	frtz	2L:1710465-1715861	wild-type	T205I	OK	39.7527	93.9119	1.24025	-4.95353	7.28806e-07	0.000116158	yes
2	XLOC_002983	Cyp6a13	2R:4458006-4459650	wild-type	T205I	OK	1.88551	10.4618	2.47211	-4.71278	2.44359e-06	0.000322633	yes
3	XLOC_002152	snRNA:U2:34ABa	2L:13211924-13212116	wild-type	T205I	OK	24188.5	9978.55	-1.27742	4.35501	1.33059e-05	0.00128069	yes
4	XLOC_005358	Cht9	2R:16955486-16956813	wild-type	T205I	OK	6.32072	1.16028	-2.44562	3.93261	8.40283e-05	0.00546107	yes
5	XLOC_013539	Tsf1	X:18281964-18284377	wild-type	T205I	OK	117.383	229.938	0.97003	-3.87337	0.000107339	0.00660634	yes
6	XLOC_006000	snoRNA:Psi28S-2622	3L:1475428-1489547	wild-type	T205I	OK	32117.8	16129.8	-0.993646	3.68694	0.000226969	0.0117105	yes
7	XLOC_004637	CG30026	2R:7296080-7296936	wild-type	T205I	OK	57.5146	107.25	0.898972	-3.43721	0.000587744	0.0243169	yes
8	XLOC_002708	intergenic	2L:14479235-14480417	wild-type	T205I	OK	0	1.31232	1.79769e+308	1.79769e+308	0.000666913	0.0264021	yes
9	XLOC_012480	transposable_elements	4:1322173-1324474	wild-type	T205I	OK	8.5699	17.3827	1.0203	-3.28117	0.00103378	0.0365	yes
10	XLOC_008704	CR45245	3L:10378510-10380468	wild-type	T205I	OK	2.00193	0.346538	-2.53031	3.27247	0.00106614	0.0373332	yes
11	XLOC_012195	CR44922	3R:201397-203842	wild-type	T205I	OK	0.152716	1.44968	3.24681	-3.24044	0.00119344	0.0405676	yes
